# Supplementary material for: Classification of FinTech Patents by Machine Learning and Deep Learning Reveals Trends of FinTech Development in China
Source: Hindawi journal article supplement (doi:10.1155/2022/1852447), 2022-07-08
Supplement: f1 [file 1852447.f1.txt]

×¨ÀûÃû³Æ	ÉêÇëÈË	ÉêÇëÈÕ	¹«¿ªÈÕ	±àºÅ	Ö÷·ÖÀàºÅ	×´Ì¬	µØÖ·	ÕªÒª	·ÖÀà£¨»ùÓÚÉî¶ÈÑ§Ï°·ÖÀà£©
Ò»ÖÖ½ðÈÚÐÅÏ¢ÏµÍ³²âÊÔ·½·¨ºÍ×°ÖÃ	ÖÐ¹úÒøÁª¹É·ÝÓÐÏÞ¹«Ë¾	2013-10-29	2015-04-29	CN104572433A	Ö÷·ÖÀàºÅ£ºG06F11/36(2006.01)I	ÓÐÐ§-ÊÚÈ¨	200135 ÉÏº£ÊÐÆÖ¶«ÐÂÇøº¬Ð¦Â·36ºÅÒøÁª´óÏÃ	±¾·¢Ã÷¹«¿ªÒ»ÖÖ½ðÈÚÐÅÏ¢ÏµÍ³²âÊÔ·½·¨ºÍ×°ÖÃ¡£¸Ã·½·¨°üÀ¨ÒÔÏÂ²½Öè£ºÕë¶ÔÔ­Ê¼½»Ò×¼ÇÂ¼¼¯ºÏ²úÉú½ö°üº¬ÌØ¶¨½»Ò×²ÎÊýÀàÐÍµÄ¹éÀà½»Ò×¼ÇÂ¼¼¯ºÏ£¬¸Ã¹éÀà½»Ò×¼ÇÂ¼¼¯ºÏ²»¾ßÓÐÖØ¸´µÄ½»Ò×¼ÇÂ¼£¬»ùÓÚËùÊö¹éÀà½»Ò×¼ÇÂ¼¼¯ºÏ¼ìÑé²âÊÔÓÃ½»Ò×¼ÇÂ¼ÖÐµÄ½»Ò×²ÎÊýÏà¶ÔÓÚËùÊö¹éÀà½»Ò×¼ÇÂ¼¼¯ºÏÖÐµÄ½»Ò×²ÎÊýµÄ¸²¸ÇÂÊ£¬»ùÓÚËùÊö¸²¸ÇÂÊµ÷ÕûËùÊö²âÊÔÓÃ½»Ò×¼ÇÂ¼£¬Ê¹ÓÃµ÷ÕûºóµÄ²âÊÔÓÃ½»Ò×¼ÇÂ¼¶ÔËùÊöÏµÍ³½øÐÐ²âÊÔ¡£	Êý¾Ý·ÖÎö
Ò»ÖÖ·À¶ªÊ§ÒøÐÐ¿¨	¶ÅÓêÐù	2014-03-09	2014-05-14	CN103794001A	Ö÷·ÖÀàºÅ£ºG07F9/02(2006.01)I	Ê§Ð§-·¢Ã÷×¨ÀûÉêÇë¹«²¼ºóµÄÊÓÎª³·»Ø	618000 ËÄ´¨Ê¡µÂÑôÊÐìºÑôÇøÌ©É½ÄÏÂ·¶þ¶Î801ºÅËÄ´¨¹¤³ÌÖ°Òµ¼¼ÊõÑ§Ôº¡¢»úµç¹¤³ÌÏµ	Ò»ÖÖ·À¶ªÊ§ÒøÐÐ¿¨Ö÷ÒªÓÉÒøÐÐ¿¨Ö÷¿¨ºÍÊÕÄÉ¿¨×é³É£¬ÔÚÒøÐÐ¿¨Ö÷¿¨ÖÐÉèÖÃÒ»ºìÍâÏß£¨»ò²ÉÓÃÆäËû·½Ê½£¬ÈçÀ¶ÑÀ¡¢³¬Éù²¨·¢Éä×°ÖÃµÈ£©·¢Éä×°ÖÃ£¬Í¬Ê±ÅäÌ×ÉèÓÐÁíÍâÒ»¸ö·ÅÖÃÒøÐÐ¿¨µÄÊÕÄÉ¿¨Æ¬£¬¸Ã¿¨Æ¬ÄÚÉèÓÐºìÍâÏß½ÓÊÕ×°ÖÃ£¬²¢ÊµÊ±¼ì²âÒøÐÐ¿¨ÓëÊÕÄÉ¿¨Æ¬µÄ¾àÀë£¬µ±Á½ÕßµÄ¾àÀë´óÓÚÔ¤ÉèµÄÖµÊ±£¬ÊÕÄÉ¿¨Æ¬·¢³öÓïÒôÌáÊ¾£¬ÌáÊ¾ÒøÐÐ¿¨Ê¹ÓÃÕßÈ¡»ØÒøÐÐ¿¨¡£ÈçÒøÐÐ¿¨ÐèÒªÍâ½è£¬¿É¹Ø±ÕÌáÊ¾¹¦ÄÜ¡£ÊÕÄÉ¿¨Æ¬¿ÉÒÔÊÇ´øÓÐ°¼²ÛµÄ¿¨Æ¬£¬ÒøÐÐ¿¨Ö±½Ó·ÅÔÚÊÕÄÉ¿¨Æ¬µÄ°¼²…	°²È«
Ò»ÖÖÒøÐÐÖ÷»úÏÂ´«×÷ÒµµÄ×Ô¶¯»¯²âÊÔÏµÍ³	ÖÐ¹ú¹¤ÉÌÒøÐÐ¹É·ÝÓÐÏÞ¹«Ë¾	2014-06-04	2014-08-13	CN103984633A	Ö÷·ÖÀàºÅ£ºG06F11/36(2006.01)I	ÓÐÐ§-ÊÚÈ¨	100140 ±±¾©ÊÐÎ÷³ÇÇø¸´ÐËÃÅÄÚ´ó½Ö55ºÅ	±¾·¢Ã÷Ìá¹©Ò»ÖÖÒøÐÐÖ÷»úÏÂ´«×÷ÒµµÄ×Ô¶¯»¯²âÊÔÏµÍ³£¬¸ÃÏµÍ³°üÀ¨£ºÔ´ÎÄ¼þ´æ´¢·þÎñÆ÷¡¢Ä¿±êÎÄ¼þ´æ´¢·þÎñÆ÷¡¢Ô´ÎÄ¼þ´«ÊäÅäÖÃ´æ´¢×°ÖÃ¡¢Ä¿±êÎÄ¼þ´«ÊäÅäÖÃ´æ´¢×°ÖÃ¡¢Ô´ÎÄ¼þ´«Êä×°ÖÃ¡¢Ä¿±êÎÄ¼þ´«Êä×°ÖÃ£»ÒÔ¼°£¬ÒøÐÐÖ÷»ú£¬ÓÃÓÚÆô¶¯ÏÂ´«×÷Òµ£¬Éú³ÉÔ´ÎÄ¼þ£»´¥·¢×°ÖÃ£¬ÓÃÓÚ½«ÏÂ´«×÷ÒµÃüÁî´«Êä¸øÒøÐÐÖ÷»ú£¬´ýÒøÐÐÖ÷»úÆô¶¯ÏÂ´«×÷Òµºó£¬È¡³öÔ´ÎÄ¼þ²¢ÏÂ´«ÖÁÔ´ÎÄ¼þ´æ´¢·þÎñÆ÷ÖÐ£»ÎÄ¼þ´¦Àí×°ÖÃ£¬¶ÔÔ´ÎÄ¼þ½øÐÐÒëÂë´¦ÀíÒÔÉú³ÉÄ¿±êÎÄ¼þ£¬²¢ÏÂ´«ÖÁÄ¿±êÎ…	Êý¾Ý·ÖÎö
Ò»ÖÖÒôÆµ¶Ü¼æÈÝÐÔ²âÊÔ·½·¨¼°ÏµÍ³	ÉîÛÚÊÐÎÄ¶¦´´Êý¾Ý¿Æ¼¼ÓÐÏÞ¹«Ë¾	2014-06-11	2014-09-10	CN104035847A	Ö÷·ÖÀàºÅ£ºG06F11/22(2006.01)I	ÓÐÐ§-ÊÚÈ¨	518057 ¹ã¶«Ê¡ÉîÛÚÊÐÄÏÉ½Çø¿Æ·áÂ·2ºÅÌØ·¢ÐÅÏ¢¸Û´óÏÃA¶°ÆßÂ¥ÄÏ701-709µ¥Ôª	±¾·¢Ã÷ÊôÓÚÉè±¸¼æÈÝÐÔ²âÊÔÁìÓò£¬¹«¿ªÁËÒ»ÖÖÒôÆµ¶Ü¼æÈÝÐÔ²âÊÔ·½·¨¼°ÏµÍ³¡£ÔÚ±¾·¢Ã÷ÊµÊ©ÀýÖÐ£¬Í¨¹ý²âÊÔÒôÆµ¶ÜÊÇ·ñÄÜÓëÒÆ¶¯ÖÕ¶Ë½øÐÐÊý¾ÝÍ¨ÐÅÅÐ¶ÏÒôÆµ¶ÜÊÇ·ñÓë¸ÃÒÆ¶¯ÖÕ¶Ë¼æÈÝ£¬±ãÓÚÒôÆµ¶Ü¿ª·¢ÉÌ½øÐÐ¼æÈÝÐÔÍ³¼Æ£¬¿ª·¢²»Í¬µÄ°æ±¾ÒÔ¶Ô²»¼æÈÝµÄÒÆ¶¯ÖÕ¶Ë½øÐÐ¼æÈÝÐÔÊÊÅä£¬Ê¹ÓÃ»§ÄÜ¹»µÃµ½¸üºÃµÄ°²È«Ö§¸¶±£Ö¤¡£	°²È«
Ò»ÖÖ½ðÈÚÖ§¸¶µÄ²âÊÔÆ½Ì¨¡¢·½·¨¼°ÏµÍ³	¶«ÐÅºÍÆ½¿Æ¼¼¹É·ÝÓÐÏÞ¹«Ë¾	2014-12-23	2015-03-25	CN104461902A	Ö÷·ÖÀàºÅ£ºG06F11/36(2006.01)I	Ê§Ð§-·¢Ã÷×¨ÀûÉêÇë¹«²¼ºóµÄ²µ»Ø	519060 ¹ã¶«Ê¡Öéº£ÊÐÄÏÆÁ¿Æ¼¼¹¤ÒµÔ°ÆÁ¹¤ÖÐÂ·8ºÅ	±¾·¢Ã÷ÊµÊ©Àý¹«¿ªÁËÒ»ÖÖ½ðÈÚÖ§¸¶µÄ²âÊÔÆ½Ì¨¡¢·½·¨¼°ÏµÍ³£¬±¾·¢Ã÷ÊµÊ©Àý°üÀ¨£ºÖ´ÐÐµ¥ÔªºÍ½ðÈÚÖ§¸¶Ó¦ÓÃ²âÊÔ¼¯£»Ö´ÐÐµ¥ÔªºÍ½ðÈÚÖ§¸¶Ó¦ÓÃ²âÊÔ¼¯½¨Á¢ÓÐÊý¾ÝÍ¨ÐÅ¹ØÏµ£»½ðÈÚÖ§¸¶Ó¦ÓÃ²âÊÔ¼¯Ö÷ÒªÓÉÖ÷º¯Êý²âÊÔ½Å±¾ºÍ»ù´¡º¯Êý²âÊÔ½Å±¾×é³É£»Ö´ÐÐµ¥Ôª£¬ÓÃÓÚµ÷ÓÃÓë½ðÈÚ²âÊÔ¶ÔÏóÏà¶ÔÓ¦µÄ¹¤³ÌÎÄ¼þ£¬²¢¸ù¾Ý¹¤³ÌÎÄ¼þ¶¨Î»ÓëÖ®¹ØÁªµÄÖ÷º¯Êý²âÊÔ½Å±¾£»½ðÈÚÖ§¸¶Ó¦ÓÃ²âÊÔ¼¯£¬ÓÃÓÚ½«¸ù¾Ý¹¤³ÌÎÄ¼þ¶¨Î»ºóµÄÖ÷º¯Êý²âÊÔ½Å±¾ÓëÏà¹ØÁªµÄ»ù´¡º¯Êý²âÊÔ½Å±¾ÐÎ³ÉµÄ²…	°²È«
Ò»ÖÖ½ðÈÚÓ¦ÓÃÏµÍ³ºóÌ¨½ø³ÌÒì³£¼ì²â·½·¨¼°×°ÖÃ	ÖÐ¹ú¹¤ÉÌÒøÐÐ¹É·ÝÓÐÏÞ¹«Ë¾	2015-05-12	2015-09-16	CN104915289A	Ö÷·ÖÀàºÅ£ºG06F11/36(2006.01)I	ÓÐÐ§-ÊÚÈ¨	100140 ±±¾©ÊÐÎ÷³ÇÇø¸´ÐËÃÅÄÚ´ó½Ö55ºÅ	±¾·¢Ã÷Éæ¼°Ò»ÖÖ½ðÈÚÓ¦ÓÃÏµÍ³ºóÌ¨½ø³ÌÒì³£¼ì²â·½·¨¼°×°ÖÃ£¬ÆäÖÐ£¬¸Ã·½·¨°üÀ¨£ºÆô¶¯¼àÊÓ´¦Àí×ÓÏµÍ³£¬¼àÊÓ´¦Àí×ÓÏµÍ³Æô¶¯¼àÊÓ½ø³Ì£»¼àÊÓ´¦Àí×ÓÏµÍ³´Ó¼àÊÓ½ø³ÌÖÐ¶ÁÈ¡¼àÊÓ½ø³Ì¿ØÖÆ±í£¬»ñÈ¡¼ì²âÊ±¼ä¼ä¸ô£¬²¢Ë³Ðò¶ÁÈ¡Ó¦ÓÃºóÌ¨½ø³Ì¿ØÖÆ±í£»¼àÊÓ´¦Àí×ÓÏµÍ³´ÓÓ¦ÓÃºóÌ¨½ø³Ì¿ØÖÆ±íÖÐ¶Á³öÓ¦ÓÃºóÌ¨½ø³ÌÐÅÏ¢£»Èç¹ûÓ¦ÓÃºóÌ¨½ø³ÌÖÐÃ»ÓÐÎ´´¦ÀíµÄÓ¦ÓÃºóÌ¨½ø³Ì£¬Ôò¼àÊÓ´¦Àí×ÓÏµÍ³¸ù¾Ý¼ì²âÊ±¼ä¼ä¸ô¶ÔÏÂÒ»ÌõÓ¦ÓÃºóÌ¨½ø³Ì¼ì²â£»Èç¹ûÓ¦ÓÃºóÌ¨½ø³ÌÖÐ´æÔÚÎ´´…	°²È«
½ðÈÚ×ÔÖúÉè±¸¼ì²â·½·¨¼°¼ì²â×°ÖÃ	ÉîÛÚâù»¯µçÄÔ¹É·ÝÓÐÏÞ¹«Ë¾	2015-05-27	2015-09-16	CN104915273A	Ö÷·ÖÀàºÅ£ºG06F11/22(2006.01)I	ÓÐÐ§-ÊÚÈ¨	518000 ¹ã¶«Ê¡ÉîÛÚÊÐ¸£ÌïÇø½ðÌïÂ·4018ºÅ°²Áª´óÏÃ27Â¥A02	±¾·¢Ã÷ÊµÊ©Àý¹«¿ªÁËÒ»ÖÖ½ðÈÚ×ÔÖúÉè±¸¼ì²â·½·¨¼°¼ì²â×°ÖÃ£¬ËùÊö¼ì²â×°ÖÃ°üÀ¨Í¨¹ýÏßÂ·ÒÀ´ÎÁ¬½ÓµÄÖ÷ÒªÓÃÓÚÏÔÊ¾Èí¼þUIµÄ¼ÆËã»ú¡¢CAN¿¨¼°²âÊÔPCB°å£¬ËùÊö²âÊÔPCB°åÍ¨¹ýÏßÂ·Á¬½ÓÓÚ½ðÈÚ×ÔÖúÉè±¸¡£±¾·¢Ã÷ÊµÊ©ÀýÍ¨¹ý¶Ô±»¼ì²âÉè±¸µÄ¸÷¼ì²â¶ÔÏó½øÐÐ¼ì²â£¬ÔÚ¼ì²âµ½´íÎóÊ±£¬µ÷ÓÃÊý¾Ý±í·¢³öÏàÓ¦ÌáÊ¾»ò½øÒ»²½È·¶¨ÎÊÌâËùÔÚ£¬¶Ô´íÎó²»¶Ï½øÐÐ¶¨Î»ºÍ·ÖÎö£¬Öð²½ËõÐ¡´íÎó·¶Î§£¬´íÎó·ÖÎöÈ«ÃæÇÒÕë¶ÔÐÔÇ¿£¬½ðÈÚ×ÔÖúÉè±¸¼ì²â×°ÖÃµÄÔËÐÐÐ§ÂÊ¸ß£¬´ó´ó¼õÉÙÁË¼ì…	Êý¾Ý·ÖÎö
Ò»ÖÖÆÚ»õ½»Ò×Ëù½»Ò×Ç°ÖÃÏµÍ³Ä£ÄâÆ÷	ÄÏ¾©°¬¿ÆÀÊ¿ËÐÅÏ¢¿Æ¼¼ÓÐÏÞ¹«Ë¾	2015-07-08	2017-01-18	CN106339307A	Ö÷·ÖÀàºÅ£ºG06F11/36(2006.01)I	ÔÚÉó-ÊµÖÊÉó²éµÄÉúÐ§	210014 ½­ËÕÊ¡ÄÏ¾©ÊÐÇØ»´ÇøÓÀÖÇÂ·6ºÅÖÐ¹úÔÆ¼ÆËã´´ÐÂ»ùµØB´±216ÊÒ	±¾·¢Ã÷¹«¿ªÁËÒ»ÖÖÆÚ»õ½»Ò×Ëù½»Ò×Ç°ÖÃÏµÍ³Ä£ÄâÆ÷£¬°üÀ¨Á¬½ÓÄ£¿é¡¢ÃüÁî¹ÜÀíÄ£¿é¡¢¹ÜÀíÄ£¿é¡¢±¨ÎÄ×éÖ¯Óë´¦ÀíÄ£¿é£»¹ÜÀíÄ£¿éÖ÷Òª¸ºÔð¸÷Ä£¿é¼äµÄÊý¾Ý½»»¥¡¢´¦ÀíÒÔ¼°×÷ÎªÒµÎñÂß¼­¹¦ÄÜµÄÖ÷ÒªÊµÏÖ²¿·Ö£»µ±ÐèÒª·¢ËÍÊý¾ÝÊ±£¬¹ÜÀíÄ£¿é×éÖ¯²¢»ñÈ¡ÒµÎñÊý¾Ý£¬µ÷ÓÃ±¨ÎÄ×éÖ¯Óë´¦ÀíÄ£¿é¶ÔÊý¾Ý½øÐÐ·â×°£¬ÔÙÍ¨¹ýÁ¬½ÓÄ£¿é½øÐÐÊý¾Ý·¢ËÍ£»ÊÕµ½Êý¾ÝÊ±£¬ÓÉÁ¬½ÓÄ£¿é»ñÈ¡Êý¾Ý±¨ÎÄ²¢¾­±¨ÎÄ×éÖ¯Óë´¦ÀíÄ£¿é½âÎö´¦Àí×îºóÍ¨¹ý¹ÜÀíÄ£¿é×÷ÒµÎñÂß¼­µÄ´¦Àí£»ÃüÁî¹ÜÀíÄ…	Êý¾Ý·ÖÎö
Ò»ÖÖ½ðÈÚ×ÔÖúÉè±¸ÈÝ´í·½·¨	ÉîÛÚâù»¯µçÄÔ¹É·ÝÓÐÏÞ¹«Ë¾	2015-07-29	2015-12-09	CN105138411A	Ö÷·ÖÀàºÅ£ºG06F11/07(2006.01)I	ÔÚÉó-ÊµÖÊÉó²éµÄÉúÐ§	518038 ¹ã¶«Ê¡ÉîÛÚÊÐ¸£ÌïÇø½ðÌïÂ·4018ºÅ°²Áª´óÏÃ27Â¥A02	±¾·¢Ã÷¹«¿ªÒ»ÖÖ½ðÈÚ×ÔÖúÉè±¸ÈÝ´í·½·¨£¬°üÀ¨£ºÏòÓëÓ¦ÓÃÒµÎñÏà¹ØÁªµÄËùÓÐµç»ú·¢ËÍÆô¶¯Ö¸Áî£»°´Ô¤ÉèË³ÐòÖðÒ»¼ì²âËùÊöµç»úÊÇ·ñ³É¹¦Æô¶¯£»Èô¼ì²âµ½Æô¶¯¹ÊÕÏµÄµç»ú£¬ÇÒËùÊöÆô¶¯¹ÊÕÏµÄµç»úÖØÐÂÆô¶¯µÄ´ÎÊýÐ¡ÓÚÔ¤Éè´ÎÊý£¬ÔòÖØÐÂÆô¶¯ËùÊöÆô¶¯¹ÊÕÏµÄµç»ú¡£±¾·¢Ã÷Í¨¹ý¼ì²âµç»úÊÇ·ñÆô¶¯³É¹¦£¬²¢¶ÔÆô¶¯¹ÊÕÏµÄµç»ú½øÐÐÖØÐÂÆô¶¯£¬Ê¹ÓÃÈí¼þÈÝ´íµÄ·½·¨¼õÉÙÁË½ðÈÚ×ÔÖúÉè±¸Ê¹ÓÃ¹ý³ÌÖÐµç»ú³öÏÖ¹ÊÕÏµÄ¸ÅÂÊ£¬¸ø¹Ë¿Í¸üºÃµÄÌåÑéÐ§¹û£»²»ÐèÒªÈÎºÎÍâ²¿µÄ×é¼þÀ…	Êý¾Ý·ÖÎö
Ò»ÖÖÑé³®´ÅÐÔÊý¾ÝµÄ¶¯Ì¬½ÃÕý·½·¨ºÍÏµÍ³	ÉîÛÚâù»¯µçÄÔ¹É·ÝÓÐÏÞ¹«Ë¾	2015-09-16	2016-01-20	CN105260263A	Ö÷·ÖÀàºÅ£ºG06F11/14(2006.01)I	ÔÚÉó-ÊµÖÊÉó²éµÄÉúÐ§	518038 ¹ã¶«Ê¡ÉîÛÚÊÐ¸£ÌïÇø½ðÌïÂ·4018ºÅ°²Áª´óÏÃ27Â¥A02	±¾·¢Ã÷¹«¿ªÁËÒ»ÖÖÑé³®´ÅÐÔÊý¾ÝµÄ¶¯Ì¬½ÃÕý·½·¨£¬¸Ã·½·¨°üÀ¨£º½ÓÊÕµ±Ç°Ñé³®´ÅÐÔÊý¾Ý£»ÅÐ¶Ï³öËùÊöµ±Ç°Ñé³®´ÅÐÔÊý¾ÝµÄÇ°n-1ÐÐÊý¾Ý²»ÕýÈ·£¬n´óÓÚµÈÓÚ1£»½«±£ÁôµÄÕýÈ·Ñé³®´ÅÐÔÊý¾ÝµÄÇ°n-1ÐÐÊý¾ÝÌæ´úËùÊöµ±Ç°Ñé³®´ÅÐÔÊý¾ÝµÄÇ°n-1ÐÐÊý¾Ý£¬´ÓËùÊöµ±Ç°Ñé³®´ÅÐÔÊý¾ÝµÄÕýÈ·Êý¾Ý»ñÈ¡³®Æ±ÕÅÊý£¬½«¸Ã³®Æ±ÕÅÊýÌæ´úÇ°n-1ÐÐÊý¾ÝÏàÓ¦Î»ÖÃµÄ³®Æ±ÕÅÊý¡£±¾·¢Ã÷Í¨¹ý¶¯Ì¬½ÃÕý½ÓÊÕµÄÑé³®´ÅÐÔÊý¾Ý£¬¶Ô³ö´íµÄÑé³®´ÅÐÔÊý¾Ý½øÐÐ¶¯Ì¬½ÃÕý£¬¿ÉÒÔ¶ÔÏÖÓÐµÄ¹¤³Ì½øÐÐÎ…	Êý¾Ý·ÖÎö
Ò»ÖÖ²âÊÔ½ðÈÚ×ÔÖúÉè±¸µÄ·½·¨¼°×°ÖÃ	ÉîÛÚâù»¯µçÄÔ¹É·ÝÓÐÏÞ¹«Ë¾	2015-09-22	2016-01-13	CN105242999A	Ö÷·ÖÀàºÅ£ºG06F11/22(2006.01)I	ÔÚÉó-ÊµÖÊÉó²éµÄÉúÐ§	518038 ¹ã¶«Ê¡ÉîÛÚÊÐ¸£ÌïÇø½ðÌïÂ·4018ºÅ°²Áª´óÏÃ27Â¥A02	±¾·¢Ã÷ÊµÊ©Àý¹«¿ªÁËÒ»ÖÖ²âÊÔ½ðÈÚ×ÔÖúÉè±¸µÄ·½·¨¼°×°ÖÃ£¬Í¨¹ý½«µ¥²½Ö¸Áî¸ù¾ÝÔ¤ÏÈÉèÖÃµÄ²âÊÔ¹æÔò½øÐÐ×éºÏ£¬²¢´æ´¢×éºÏËùÊöµ¥²½Ö¸ºóµÄ¶à²½Ö¸Áî£¬ËùÊö²âÊÔ¹æÔòÎª´ý²âÊÔµÄÖ¸Áî¶ÔÓ¦µÄ²»Í¬Â·¾¶µÄ¹æÔò£»¸ù¾ÝÓÃ»§ÊäÈëµÄ´ý²âÊÔµÄÖ¸Áî£¬»ñÈ¡ÓëËùÊö´ý²âÊÔµÄÖ¸Áî¶ÔÓ¦µÄ¶à²½Ö¸Áî£»¸ù¾ÝËùÊö¶à²½Ö¸Áî¶ÔÒÆ¶¯ÖÕ¶Ë½øÐÐ×Ô¶¯²âÊÔ£¬´Ó¶øÍ¨¹ýÈ«×Ô¶¯»¯²âÊÔµÄ·½·¨£¬¸ÄÉÆÁËÖ»ÄÜÍ¨¹ýÈË¹¤²Ù×÷µÄ·½Ê½£¬Ìá¸ßÁËÐ§ÂÊ£¬½µµÍÁËÈË¹¤³É±¾£»±ÜÃâÁËÈË¹¤²Ù×÷¿ÉÄÜ³öÏÖ´íÎóµ…	Êý¾Ý·ÖÎö
Ò»ÖÖÖ½±ÒÊ¶±ðÄ£¿éµÄÈÕÖ¾´æ´¢·½·¨¼°ÏµÍ³	ÉîÛÚâù»¯µçÄÔ¹É·ÝÓÐÏÞ¹«Ë¾	2015-09-30	2015-12-23	CN105183626A	Ö÷·ÖÀàºÅ£ºG06F11/34(2006.01)I	ÓÐÐ§-ÊÚÈ¨	518038 ¹ã¶«Ê¡ÉîÛÚÊÐ¸£ÌïÇø½ðÌïÂ·4018ºÅ°²Áª´óÏÃ27Â¥A02	±¾·¢Ã÷¹«¿ªÁËÒ»ÖÖÖ½±ÒÊ¶±ðÄ£¿éµÄÈÕÖ¾´æ´¢·½·¨£¬ÆäÌØÕ÷ÔÚÓÚ£¬°üÀ¨£º½ÓÊÕÈÕÖ¾ÏûÏ¢£¬°ÑËùÊöÈÕÖ¾ÏûÏ¢Ð´ÈëÈÕÖ¾»º´æÇø£»»ñÈ¡µ±Ç°Ö½±ÒÊ¶±ðÄ£¿éµÄ×´Ì¬£»ÈôËùÊöµ±Ç°Ö½±ÒÊ¶±ðÄ£¿éÎª¿ÕÏÐ×´Ì¬£¬Ôò´ÓÈÕÖ¾»º´æÇøÖÐ¶ÁÈ¡ÈÕÖ¾ÏûÏ¢Ð´ÈëNand?FlashÖÐ£»ÈôËùÊöµ±Ç°Ö½±ÒÊ¶±ðÄ£¿éÎª¹¤×÷×´Ì¬£¬ÇÒËùÊöÈÕÖ¾»º´æÇøµÄÈÕÖ¾ÏûÏ¢´óÓÚµÈÓÚ×î´óÔ¤ÖÃ×Ö½Ú£¬Ôò´ÓÈÕÖ¾»º´æÇøÖÐ¶ÁÈ¡ÈÕÖ¾ÏûÏ¢Ð´ÈëNand?FlashÖÐ¡£±¾·¢Ã÷Ìá¹©µÄÖ½±ÒÊ¶±ðÄ£¿éµÄÈÕÖ¾´æ´¢·½·¨Í¨¹ý»ñÈ¡µ±Ç°Ö½±ÒÊ¶±…	Êý¾Ý·ÖÎö
º½°à²éÑ¯ÏµÍ³¿É¿¿ÐÔÆÀ¹À·½·¨¼°×°ÖÃ	ÖÐ¹úÃñº½ÐÅÏ¢ÍøÂç¹É·ÝÓÐÏÞ¹«Ë¾	2015-12-28	2016-06-08	CN105653424A	Ö÷·ÖÀàºÅ£ºG06F11/30(2006.01)I	ÓÐÐ§-ÊÚÈ¨	100010 ±±¾©ÊÐ¶«³ÇÇø¶«ËÄÎ÷´ó½Ö157	±¾·¢Ã÷¹«¿ªÁËÒ»ÖÖº½°à²éÑ¯ÏµÍ³¿É¿¿ÐÔÆÀ¹À·½·¨£¬ËùÊö·½·¨°üÀ¨£º½«·Ç½á¹¹»¯µÄÔ­Ê¼±¨¾¯Êý¾Ý°´ÕÕ±¨¾¯Ê±¼äÐÎ³É±¨¾¯ÐòÁÐ£»ÔÚËùÊö±¨¾¯ÐòÁÐÉÏÈ¡Ò»¸ö±¨¾¯×ÓÐòÁÐ£¬ÐÎ³ÉÊ±¼ä´°¿Ú£»Éè¶¨»¬¶¯²½³¤£¬»ùÓÚ¸Ã»¬¶¯²½³¤ÔÚËùÊöÊ±¼ä´°¿ÚÉÏ±éÀúÕû¸öËùÊö±¨¾¯ÐòÁÐ£»ÇåÏ´Ã¿¸öËùÊöÊ±¼ä´°¿ÚµÄ±¨¾¯Êý¾Ý£¬±£Áô±¨¾¯¹Ø¼üÐÅÏ¢£¬Éú³É±¨¾¯Êý¾Ý¿â£»Ñ¹ËõËùÊö±¨¾¯Êý¾Ý¿âÖÐÃ¿¸öÊ±¼ä´°¿ÚÄÚµÄ±¨¾¯Êý¾ÝÒÔÐÎ³É¹ÊÕÏÊý¾Ý£»½«ËùÊö¹ÊÕÏÊý¾ÝÊÊÅäÎª¿É¿¿ÐÔÄ£ÐÍÏàÊÊÓ¦µÄÊý¾Ý£¬½«ËùÊö¿…	Ö§¸¶
²ÆÎñÊý¾Ý³éÈ¡·½·¨¼°ÏµÍ³	ÉÏº£Ð¯³ÌÉÌÎñÓÐÏÞ¹«Ë¾	2016-02-17	2016-07-13	CN105760485A	Ö÷·ÖÀàºÅ£ºG06F17/30(2006.01)I	ÔÚÉó-ÊµÖÊÉó²éµÄÉúÐ§	200335 ÉÏº£ÊÐ³¤ÄþÇø½ðÖÓÂ·968ºÅ16ºÅÂ¥10Â¥	±¾·¢Ã÷Ìá¹©Ò»ÖÖ²ÆÎñÊý¾Ý³éÈ¡·½·¨¼°ÏµÍ³£¬Æä»ùÓÚ¶à¸öÔ´Êý¾Ý¿âÊµÏÖ£¬Ã¿Ò»Ô´Êý¾Ý¿â´æ´¢ÓÐ¶à¸öÊý¾Ý£¬Ã¿Ò»Êý¾Ý°üÀ¨¶©µ¥ºÅ¡¢¶©µ¥×´Ì¬¡¢½ð¶îÐÅÏ¢ÒÔ¼°Ê±¼ä´Á£¬·½·¨°üÀ¨£ºS	Êý¾Ý·ÖÎö
Ò»ÖÖ×ÔÖúÏ´µÓÉè±¸ÐÅÏ¢½»»¥·½·¨¼°×°ÖÃ	Çàµºº£¶ûÏ´ÒÂ»úÓÐÏÞ¹«Ë¾	2016-02-23	2017-08-29	CN107103707A	Ö÷·ÖÀàºÅ£ºG07F17/20(2006.01)I	ÔÚÉó-¹«¿ª	266101 É½¶«Ê¡ÇàµºÊÐáÀÉ½Çø¸ß¿ÆÔ°º£¶ûÂ·1ºÅº£¶û¹¤ÒµÔ°	±¾·¢Ã÷¹«¿ªÁËÒ»ÖÖ×ÔÖúÏ´µÓÉè±¸ÐÅÏ¢½»»¥·½·¨¼°×°ÖÃ£¬ÆäÖÐ£¬ËùÊö·½·¨°üÀ¨£º½ÓÊÕÒÆ¶¯ÖÕ¶Ë·¢ËÍµÄ¶ÔÏ´µÓÉè±¸ÖÐµ±Ç°Ï´µÓÊÂ¼þµÄ¹ØÁªÇëÇó£¬ËùÊö¹ØÁªÇëÇó°üÀ¨£ºµ±Ç°Ï´µÓÊÂ¼þµÄÊÂ¼þ±êÊ¶·ûºÍËùÊöÒÆ¶¯ÖÕ¶Ë±êÊ¶·û£»Èç¹û¸ù¾ÝËùÊöÊÂ¼þ±êÊ¶·ûÈ·¶¨ËùÊöµ±Ç°Ï´µÓÊÂ¼þµÄÖ§¸¶×´Ì¬ÎªÏßÏÂÒÑÖ§¸¶£¬Ôò¸ù¾ÝËùÊöÊÂ¼þ±êÊ¶·ûºÍËùÊöÒÆ¶¯ÖÕ¶Ë±êÊ¶·û½¨Á¢ÒÆ¶¯ÖÕ¶ËÓëËùÊöµ±Ç°Ï´µÓÊÂ¼þµÄ¶ÔÓ¦¹ØÏµ£»ÏòËùÊöÒÆ¶¯ÖÕ¶Ë·¢ËÍµ±Ç°Ï´µÓÊÂ¼þµÄÍê³É½ø¶ÈÐÅÏ¢¡£¿ÉÒÔÊ¹µÃÏßÏÂÖ§¸¶ÓÃ»…	Ö§¸¶
ÍøÂçÒøÐÐÄ£ÄâÏµÍ³¼°·½·¨	ÉÏº£Ð¯³ÌÉÌÎñÓÐÏÞ¹«Ë¾	2016-05-04	2016-10-12	CN106021091A	Ö÷·ÖÀàºÅ£ºG06F11/36(2006.01)I	ÔÚÉó-ÊµÖÊÉó²éµÄÉúÐ§	200335 ÉÏº£ÊÐ³¤ÄþÇø½ðÖÓÂ·968ºÅ16ºÅÂ¥10Â¥	±¾·¢Ã÷¹«¿ªÁËÒ»ÖÖÍøÂçÒøÐÐÄ£ÄâÏµÍ³¼°·½·¨£¬ÏµÍ³°üÀ¨Í¨ÐÅÄ£¿é¡¢Êý¾Ý°ü½âÂëÄ£¿é¡¢Ç©ÃûÑéÖ¤Ä£¿éÒÔ¼°ÒøÐÐÒµÎñÄ£ÄâÄ£¿é£»ËùÊöÍ¨ÐÅÄ£¿é´æ´¢Í¨ÐÅ¶Ë¿ÚÓëÒøÐÐÍ¨µÀµÄ½»Ò×ÀàÐÍµÄ¶ÔÓ¦¹ØÏµ£¬²¢½ÓÊÕÍøÂçÖ§¸¶Ó¦ÓÃ·¢ÆðµÄµ÷ÓÃÇëÇó£¬¸ù¾Ýµ÷ÓÃÇëÇóµÄÒøÐÐÍ¨µÀÆ¥Åä¶ÔÓ¦µÄÍ¨ÐÅ¶Ë¿Ú£¬²¢½«µ÷ÓÃÇëÇóµÄÊý¾Ý°ü·¢ËÍÖÁ¶ÔÓ¦µÄÍ¨ÐÅ¶Ë¿Ú£»ËùÊöÊý¾Ý°ü½âÂëÄ£¿é°´ÕÕÐ­ÒéÀàÐÍ¶ÔËùÊöÊý¾Ý°ü½øÐÐ½â°ü£¬²¢½«½â°üºóµÄÊý¾Ý·¢ËÍÖÁËùÊöÇ©ÃûÑéÖ¤Ä£¿é£»ËùÊöÇ©ÃûÑéÖ¤Ä£¿é¶ÔËùÊö½â°…	°²È«
Ò»ÖÖÖÇ»ÛÒøÐÐÍøµãÊµÌå»úÆ÷ÈË	Õã½­Î¬ÈÚµç×Ó¿Æ¼¼¹É·ÝÓÐÏÞ¹«Ë¾	2016-05-14	2016-07-27	CN105798925A	Ö÷·ÖÀàºÅ£ºB25J11/00(2006.01)I	ÓÐÐ§-ÊÚÈ¨	325800 Õã½­Ê¡ÎÂÖÝÊÐ²ÔÄÏÏØÁéÏªÕòÓ¿½ðÂ·188ºÅ	±¾·¢Ã÷¹«¿ªÁËÒ»ÖÖÖÇ»ÛÒøÐÐÍøµãÊµÌå»úÆ÷ÈË£¬ÆäÄÜÍ¨¹ýÃæ²¿Ê¶±ðÓëÉí·ÝÐÅÏ¢½áºÏÈ·ÈÏ³Ö¿¨ÈËÉí·Ý¡¢¾ßÓÐÓïÒôÊ¶±ðÄÜÁ¦ÇÒ¾ßÓÐÆ±¾ÝÓ¡ÕÂ¡¢É¨ÃèµÈ¹¦ÄÜ£¬°üÀ¨»úÌå¡¢Æ±¾Ý´¦Àí×°ÖÃ¡¢ÓïÒôÊ¶±ðºÍÓïÒôºÏ³É×°ÖÃ¡¢Éí·ÝÖ¤ºÍÈËÁ³Ê¶±ð×°ÖÃ£¬ËùÊöµÄ»úÌåµ×²¿ÉèÓÐÍòÏòÂÖ£¬ËùÊöµÄ»úÌåÓÉÉÏÖÁÏÂ»¹ÉèÓÐÆ±¾Ý³ö¿Ú¡¢U¶Ü³ö¿Ú¡¢¿É´¥ÃþÏÔÊ¾ÆÁ¡¢Éí·ÝÖ¤¶Á¿¨¿Ú¡¢ÒøÐÐ¿¨¶Á¿¨¿Ú¡¢U¶Ü²å¿Ú¡¢ÖÃÎï¼Ü×é¼þ¡£±¾·¢Ã÷¹¦ÄÜÈ«Ãæ£¬ÄÜ¹»´¦Àí´ó²¿·Ö´°¿Ú²ÅÄÜ´¦ÀíµÄÒµÎñ£¬¿ÉÓÐÐ§·Öµ£´°¿ÚÒµÎ…	°²È«
Ò»ÖÖÓÃÓÚ½ðÈÚÉè±¸µÄÊý¾ÝÍ¨Ñ¶·½·¨¡¢½ðÈÚÉè±¸ºÍÒÆ¶¯ÖÕ¶Ë	±±¾©ÐÂ°¶ÏßÊý×ÖÍ¼Ïñ¼¼ÊõÓÐÏÞ¹«Ë¾	2016-05-17	2017-11-24	CN107395383A	Ö÷·ÖÀàºÅ£ºH04L12/24(2006.01)I	ÔÚÉó-¹«¿ª	100084 ±±¾©ÊÐº£µíÇøÖÐ¹Ø´å¶«Â·1ºÅÔºÇå»ª¿Æ¼¼Ô°¿Æ¼¼´óÏÃA×ù16²ã	±¾·¢Ã÷¹«¿ªÁËÒ»ÖÖÓÃÓÚ½ðÈÚÉè±¸µÄÊý¾ÝÍ¨Ñ¶·½·¨£¬°üÀ¨£º¼ì²âÊÇ·ñÓÐÒÆ¶¯ÖÕ¶ËÍ¨¹ýWIFI½ÓÈë£»Èç¹û¼ì²âµ½ÓÐÒÆ¶¯ÖÕ¶Ë½ÓÈë£¬Ôò¶ÔËùÊöÒÆ¶¯ÖÕ¶ËµÄºÏ·¨ÐÔ½øÐÐÑéÖ¤£»Èç¹ûÑéÖ¤½á¹ûÊÇºÏ·¨£¬Ôò´Ó½ðÈÚÉè±¸µÄÊý¾Ý¿âÖÐ¶ÁÈ¡Êý¾Ý£¬½«ËùÊöÊý¾ÝÐ´ÈëËùÊöÒÆ¶¯ÖÕ¶Ë²¢±£´æ£¬»ò£¬½«ËùÊöÊý¾ÝÉÏ±¨·¢ËÍÖÁ·þÎñÆ÷¡£²ÉÓÃ±¾·¢Ã÷Ìá¹©µÄ¼¼Êõ·½°¸£¬ÄÜ¹»°²È«µØ¡¢×Ô¶¯Íê³É½«Êý¾ÝÖÜÆÚÐÔ»ò¶¨Ê±ÉÏ±¨¡£	°²È«
Ò»ÖÖÒøÐÐÖ÷»úÄÚ²¿²âÊÔÏµÍ³¼°·½·¨	ÖÐ¹úÒøÐÐ¹É·ÝÓÐÏÞ¹«Ë¾	2016-07-05	2016-11-23	CN106155906A	Ö÷·ÖÀàºÅ£ºG06F11/36(2006.01)I	ÔÚÉó-ÊµÖÊÉó²éµÄÉúÐ§	100818 ±±¾©ÊÐÎ÷³ÇÇø¸´ÐËÃÅÄÚ´ó½Ö1ºÅ	±¾·¢Ã÷Ìá¹©Ò»ÖÖÒøÐÐÖ÷»úÄÚ²¿²âÊÔÏµÍ³¼°·½·¨£¬°üÀ¨ÒøÐÐÖ÷»úºÍ²âÊÔ»ú£¬ÒøÐÐÖ÷»ú°üÀ¨£º½ÓÊÕ²âÊÔ»ú·¢ËÍµÄ½»Ò×²âÊÔÊý¾ÝµÄ½ÓÊÕÄ£¿é£»¸ù¾Ý½»Ò×²âÊÔÊý¾Ý½øÐÐ½»Ò×Éú³É½»Ò×²âÊÔ½á¹ûµÄ½»Ò×Ä£¿é£»½«½»Ò×²âÊÔ½á¹û·¢ËÍÖÁ²âÊÔ»úµÄ·¢ËÍÄ£¿é£»²âÊÔ»ú°üÀ¨£ºÉú³É½»Ò×²âÊÔÊý¾ÝµÄ²âÊÔÊý¾ÝÉú³ÉÄ£¿é£»½«½»Ò×²âÊÔÊý¾Ý×ªÂë³ÉÒøÐÐÖ÷»úËùÐèµÄÊý¾Ý¸ñÊ½¡¢½«½»Ò×²âÊÔ½á¹û×ªÂë³É²âÊÔ»úËùÐèµÄÊý¾Ý¸ñÊ½µÄ×ªÂëÄ£¿é£»Ê¹ÒøÐÐÖ÷»úºÍ²âÊÔ»úÍ¨¹ýTCP/IPÁ¬½Ó¡¢·¢ËÍ½»Ò×²âÊÔÊ…	Êý¾Ý·ÖÎö
Ò»ÖÖÒøÐÐÊÖ»úÓ¦ÓÃ×Ô¶¯»¯²âÊÔ·½·¨¼°ÏµÍ³	¸£½¨Ê¡Å©´åÐÅÓÃÉçÁªºÏÉç	2016-07-20	2016-12-21	CN106250307A	Ö÷·ÖÀàºÅ£ºG06F11/36(2006.01)I	ÔÚÉó-ÊµÖÊÉó²éµÄÉúÐ§	350000 ¸£½¨Ê¡¸£ÖÝÊÐ¹ÄÂ¥ÇøÎåËÄ±±Â·317ºÅ	±¾·¢Ã÷Ò»ÖÖÒøÐÐÊÖ»úÓ¦ÓÃ×Ô¶¯»¯²âÊÔ·½·¨£¬°üÀ¨¼àÌý»ñÈ¡ÊÖ»úÉè±¸¼¯ÈºµÄÊÖ»úÐÅÏ¢£¬½«ÊÖ»úÐÅÏ¢·¢ËÍ¸ø×Ô¶¯»¯²âÊÔ·þÎñÆ÷£»ÉÏ´«ÒøÐÐÒÆ¶¯Ó¦ÓÃAPP°²×°°üµ½×Ô¶¯»¯²âÊÔ·þÎñÆ÷£¬ÓÉÊÖ»úÊÊÅäÆ÷¼¯Èº¶Ô½ÓÈëµÄÊÖ»úÉè±¸¼¯Èº½øÐÐAPP°²×°£»±àÐ´Python×Ô¶¯»¯²âÊÔ½Å±¾£¬½«±àºÃµÄ²âÊÔ½Å±¾ÉÏ´«¸ø×Ô¶¯»¯²âÊÔ·þÎñÆ÷£»´Ó×Ô¶¯»¯²âÊÔ·þÎñÆ÷ÖÐÑ¡ÔñPython×Ô¶¯»¯²âÊÔ½Å±¾ºÍÒª²âÊÔµÄÊÖ»úÉè±¸¼¯Èº£¬½«²âÊÔÈÎÎñÏÂ·¢¸øÊÖ»úÊÊÅäÆ÷¼¯Èº£¬ÊÖ»úÊÊÅäÆ÷¼¯Èº¸ù¾ÝPython×Ô¶¯»¯²…	°²È«
ÒøÐÐºËÐÄÏµÍ³Êý¾Ý´¦Àí·½·¨	ÖØÇìÅ©´åÉÌÒµÒøÐÐ¹É·ÝÓÐÏÞ¹«Ë¾	2016-07-25	2017-01-04	CN106294125A	Ö÷·ÖÀàºÅ£ºG06F11/36(2006.01)I	ÔÚÉó-ÊµÖÊÉó²éµÄÉúÐ§	400000 ÖØÇìÊÐ½­±±ÇøÑóºÓ¶«Â·10ºÅ	±¾·¢Ã÷Éæ¼°ÒøÐÐÏµÍ³Êý¾Ý´¦Àí¼¼ÊõÁìÓò£¬¹«¿ªÁËÒ»ÖÖÒøÐÐºËÐÄÏµÍ³Êý¾Ý´¦Àí·½·¨£¬°üÀ¨²½Öè£ºS1£º»ñÈ¡ÒøÐÐºËÐÄÏµÍ³µÄ²»Í¬ÒµÎñÀàÐÍµÄÊý¾Ý£¬Éú³ÉÊý¾ÝÃ÷Ï¸±í£¬ËùÊöÊý¾Ý°üÀ¨±¾ÐÐ¹ñÃæÉú³ÉµÄ¹ñÃæ²âÊÔÊý¾Ý»òËûÐÐ²âÊÔÊý¾Ý£»S2£ºÑéÖ¤ËùÊöÊý¾ÝµÄÍêÕûÐÔºÍË³ÐòÐÔ£¬²¢½«ËûÐÐ²âÊÔÊý¾Ý×ª»»³É·ûºÏÒøÐÐºËÐÄÏµÍ³µÄ±ê×¼Êý¾Ý¸ñÊ½£»S3£º¶Ô¹ñÃæ²âÊÔÊý¾Ý»ò×ª»»ºóµÄËûÐÐ²âÊÔÊý¾Ý°´²»Í¬ÒµÎñ½øÐÐ´¦Àí¡£±¾·¢Ã÷µÄÒøÐÐºËÐÄÏµÍ³Êý¾Ý´¦Àí·½·¨ÖÐ£¬¶Ô±¾ÐÐ¹ñÃæ²âÊÔÊý¾ÝºÍË…	Êý¾Ý·ÖÎö
Ö§¸¶Ó¦ÓÃµÄ²âÊÔ·½·¨¼°×°ÖÃ	±±¾©Ð¡Ã×ÒÆ¶¯Èí¼þÓÐÏÞ¹«Ë¾	2016-08-12	2017-01-25	CN106354628A	Ö÷·ÖÀàºÅ£ºG06F11/36(2006.01)I	ÔÚÉó-×¨ÀûÉêÇëÈ¨¡¢×¨ÀûÈ¨µÄ×ªÒÆ	100085 ±±¾©ÊÐº£µíÇøÇåºÓÖÐ½Ö68ºÅ»ªÈóÎå²Ê³Ç¹ºÎïÖÐÐÄ¶þÆÚ9²ã01·¿¼ä	±¾¹«¿ªÊÇ¹ØÓÚÖ§¸¶Ó¦ÓÃµÄ²âÊÔ·½·¨¼°×°ÖÃ¡£¸Ã·½·¨°üÀ¨£º½ÓÊÕÓë´ý²âÊÔÖ§¸¶Ó¦ÓÃÖÐµÄ´ý²âÊÔÖ§¸¶ÇþµÀÏàÓ¦µÄ²âÊÔ»·¾³ÐÅÏ¢£»½ÓÊÕ²âÊÔÖ¸Áî£»Ö´ÐÐËùÊö´ý²âÊÔÖ§¸¶ÇþµÀ¶ÔÓ¦µÄÖ§¸¶²âÊÔÓÃÀý£¬ÒÔÄ£ÄâÓÃ»§¸ù¾ÝËùÊöÔ¤ÉèÕË»§ÐÅÏ¢ÔÚËùÊö´ý²âÊÔÖ§¸¶Ó¦ÓÃÖÐÖ´ÐÐËùÊöËùÓÐ¿É²Ù×÷²½Öè£»¸ù¾Ýµ±Ç°Ö§¸¶½á¹ûºÍËùÊö²âÊÔÓÃÀý¶ÔÓ¦µÄ»ù×¼²âÊÔ½á¹ûÊÇ·ñÒ»ÖÂ£¬È·¶¨ËùÊö´ý²âÊÔÖ§¸¶ÇþµÀÊÇ·ñ´æÔÚ¹ÊÕÏ¡£¸Ã¼¼Êõ·½°¸£¬¿ÉÒÔ×Ô¶¯²âÊÔ´ý²âÊÔÖ§¸¶ÇþµÀÊÇ·ñ´æÔÚ¹ÊÕÏ£¬Ê¹²âÊÔÈËÔ±±ÜÃ…	Ö§¸¶
Ò»ÖÖ½»Ò×´¦Àí·½·¨¼°ÏµÍ³	ÖÐ¹ú½¨ÉèÒøÐÐ¹É·ÝÓÐÏÞ¹«Ë¾	2016-08-30	2017-02-22	CN106445776A	Ö÷·ÖÀàºÅ£ºG06F11/30(2006.01)I	ÔÚÉó-ÊµÖÊÉó²éµÄÉúÐ§	100033 ±±¾©ÊÐÎ÷³ÇÇø½ðÈÚ´ó½Ö25ºÅ	±¾ÉêÇëÌá¹©ÁËÒ»ÖÖ½»Ò×´¦Àí·½·¨£¬ÔÚÒÑ»®·ÖµÄ¶à¸ö¼à¿Ø²ã¼¶ÖÐ£¬Ñ¡È¡ÖÁÉÙÒ»¸ö¼à¿Ø²ã¼¶£¬²¢ÎªÑ¡È¡µÄÃ¿Ò»¸ö¼à¿Ø²ã¼¶·ÖÅäÓëÆä¶ÔÓ¦µÄÍ³¼Æ¹æÔò£»Ó¦ÓÃÑ¡È¡µÄÃ¿Ò»¸ö¼à¿Ø²ã¼¶£¬·Ö±ð¶ÔÍ¨¹ýÔ¤Éè½»Ò×½ÚµãµÄ¸÷¸ö½»Ò×µÄ½»Ò××´Ì¬½øÐÐ¼à¿Ø²¢»ñÈ¡¼à¿Ø½á¹û£¬ÒÀ¾ÝÃ¿Ò»¼à¿Ø²ã¼¶µÄÍ³¼Æ¹æÔò¼°ÆäÏà¶ÔÓ¦µÄ¼à¿Ø½á¹û£¬·Ö±ðÍ³¼ÆËùÊöÃ¿Ò»¸ö¼à¿Ø²ã¼¶¼à¿Øµ½µÄÒì³£½»Ò×µÄÊýÁ¿£¬µ±ÈÎÒâÒ»¸öËùÊö¼à¿Ø²ã¼¶¼à¿Øµ½Òì³£½»Ò×µÄÊýÁ¿³¬¹ýÔ¤ÉèµÄµÚÒ»ÊýÁ¿ãÐÖµ£¬¸ù¾ÝÔ¤ÉèµÄÁ÷¿Ø¹æÔ…	Êý¾Ý·ÖÎö
Ò»ÖÖ±ãÓÚÏÖ³¡¶¨Î»Ö§¸¶ÖÕ¶Ë¹ÊÕÏµÄ·½·¨¼°ÆäÏµÍ³	¸£½¨ÁªµÏÉÌÓÃÉè±¸ÓÐÏÞ¹«Ë¾	2016-08-31	2017-02-15	CN106407029A	Ö÷·ÖÀàºÅ£ºG06F11/07(2006.01)I	ÔÚÉó-ÊµÖÊÉó²éµÄÉúÐ§	350000 ¸£½¨Ê¡¸£ÖÝÊÐ¹ÄÂ¥ÇøÈí¼þ´óµÀ89ºÅ¸£ÖÝÈí¼þÔ°Ò»Çø23ºÅÂ¥	±¾·¢Ã÷Éæ¼°¼ÆËã»ú¼¼ÊõÁìÓò£¬ÌØ±ðÉæ¼°Ò»ÖÖ±ãÓÚÏÖ³¡¶¨Î»Ö§¸¶ÖÕ¶Ë¹ÊÕÏµÄ·½·¨¼°ÆäÏµÍ³¡£°üÀ¨ÒÔÏÂ²½Öè£ºS1£ºÇ¶ÈëÖ§¸¶ÖÕ¶Ë¹ÊÕÏµ÷ÊÔ´úÂëµ½Ö§¸¶ÖÕ¶ËµÄÈí¼þÔ´ÂëÖÐ£»S2£ºÔËÐÐÖ§¸¶ÖÕ¶ËµÄÈí¼þ£¬Éú³ÉÈÕÖ¾£»ËùÊöÈÕÖ¾°üÀ¨³ÌÐòÔËÐÐÐÅÏ¢¡¢¹ÊÕÏÐÅÏ¢ºÍ¹ÊÕÏµ÷ÊÔÐÅÏ¢£»S3£ºÉèÖÃËùÊöÖ§¸¶ÖÕ¶Ë¹ÊÕÏµ÷ÊÔÐÅÏ¢ÈÕÖ¾¼¶±ðÎªµ÷ÊÔ¼¶±ð£»ÉèÖÃÖ§¸¶ÖÕ¶Ë³ÌÐòÔËÐÐÐÅÏ¢ºÍ¹ÊÕÏÐÅÏ¢µÄÈÕÖ¾¼¶±ðÎª¹ÊÕÏ¼¶±ð£»S4£ºµ±Ö§¸¶ÖÕ¶ËÕý³£ÔËÐÐÊ±£¬Ö§¸¶ÖÕ¶ËÊä³öµÄÈÕÖ¾¼¶±ðÎª¹ÊÕÏ¼¶±ð£»µ±Ö…	Ö§¸¶
Ò»ÖÖ±ãÓÚ¸ú×ÙºÍ¶¨Î»Ö§¸¶ÖÕ¶Ë¹ÊÕÏµÄ·½·¨¼°×°ÖÃ	¸£½¨ÁªµÏÉÌÓÃÉè±¸ÓÐÏÞ¹«Ë¾	2016-08-31	2017-02-08	CN106383759A	Ö÷·ÖÀàºÅ£ºG06F11/22(2006.01)I	ÔÚÉó-ÊµÖÊÉó²éµÄÉúÐ§	350000 ¸£½¨Ê¡¸£ÖÝÊÐ¹ÄÂ¥ÇøÈí¼þ´óµÀ89ºÅ¸£ÖÝÈí¼þÔ°Ò»Çø23ºÅÂ¥	±¾·¢Ã÷Éæ¼°Ö§¸¶ÖÕ¶Ë¼¼ÊõÁìÓò£¬¾ßÌåÉæ¼°Ò»ÖÖ±ãÓÚ¸ú×ÙºÍ¶¨Î»Ö§¸¶ÖÕ¶Ë¹ÊÕÏµÄ·½·¨¼°×°ÖÃ£¬ËùÊö·½·¨°üÀ¨ÈçÏÂ²½Öè£ºÔ¤Éè¹ÊÕÏÈÕÖ¾µÄÉú³É¸ñÊ½£»¼ì²âÖ§¸¶ÖÕ¶ËÊä³öµÄÈÕÖ¾ÊÇ·ñº¬ÓÐ¹ÊÕÏÈÕÖ¾µÄ±êÊ¶·û£»Èô¼ì²âµ½ÈÕÖ¾ÖÐº¬ÓÐ¹ÊÕÏÈÕÖ¾µÄ±êÊ¶·û£¬Ôò½«¹ÊÕÏÈÕÖ¾±£´æÔÚ´æ´¢µ¥ÔªÖÐ¡£±¾·¢Ã÷µÄÓÐÒæÐ§¹ûÔÚÓÚ£º±¾·¢Ã÷±ãÓÚ¸ú×ÙºÍ¶¨Î»Ö§¸¶ÖÕ¶Ë¹ÊÕÏµÄ·½·¨¼°×°ÖÃ£¬Í¨¹ý¸ñÊ½»¯Êä³ö¹ÊÕÏÈÕÖ¾£¬²¢ÓÉ×¨ÃÅµÄ¹ÊÕÏÈÕÖ¾ºóÌ¨·þÎñÊÕ¼¯²¢±£´æµ½FLASHÉÏ£¬ÊµÏÖÁË¼°Ê±±£´æ¹ÊÕÏÏÖ…	Ö§¸¶
±£ÏÕÀíÅâµÄ´¦Àí·½·¨¼°×°ÖÃ	Æ½°²¿Æ¼¼£¨ÉîÛÚ£©ÓÐÏÞ¹«Ë¾	2016-09-26	2018-04-03	CN107871283A	Ö÷·ÖÀàºÅ£ºG06Q40/08(2012.01)I	ÔÚÉó-ÊµÖÊÉó²éµÄÉúÐ§	518000 ¹ã¶«Ê¡ÉîÛÚÊÐ¸£ÌïÇø°ËØÔÁë¹¤ÒµÇøÆ½°²´óÏÃÁùÂ¥	±¾·¢Ã÷Éæ¼°Ò»ÖÖ±£ÏÕÀíÅâµÄ´¦Àí·½·¨¼°×°ÖÃ£¬ËùÊö±£ÏÕÀíÅâµÄ´¦Àí·½·¨°üÀ¨£ºÔÚÀíÅâÊý¾Ý¿âÖÐÅäÖÃÀíÅâ¹æÔòÖ´ÐÐµÄÊý¾Ý¿â½Å±¾£¬²¢½¨Á¢ËùÊöÀíÅâ¹æÔòµÄÈÕÖ¾±í£»»ùÓÚËùÊöÊý¾Ý¿â½Å±¾ÔËÐÐËùÊöÀíÅâ¹æÔò£¬»ñÈ¡ËùÊöÀíÅâ¹æÔòÔËÐÐºóµÄÖ´ÐÐ½á¹û£¬²¢½«ËùÊöÖ´ÐÐ½á¹û±£´æÖÁËùÊöÈÕÖ¾±íÖÐ£»°´ÕÕÔ¤ÉèµÄ·ÖÎö¹æÔò·ÖÎöËùÊöÈÕÖ¾±íÖÐ±£´æµÄÖ´ÐÐ½á¹û£¬ÒÔ·ÖÎöËùÊöÀíÅâ¹æÔòÊÇ·ñÔËÐÐÒì³££»ÈôÊÇ£¬ÔòÉú³É¹©ÓÃ»§²é¿´µÄÒì³£ÌáÐÑÐÅÏ¢£¬ºÍ/»ò£¬ÏòÔ¤¶¨ÖÕ¶Ë·¢ËÍËùÊöÒì³£ÌáÐÑ…	±£ÏÕ
Ò»ÖÖÍâ»ãFeedÏµÍ³µÄÈÝÔÖ·½·¨¼°×°ÖÃ	ÉîÛÚ¸£ÂõË¹¿Æ¼¼ÓÐÏÞ¹«Ë¾	2016-11-25	2017-11-24	CN107392759A	Ö÷·ÖÀàºÅ£ºG06Q40/04(2012.01)I	ÔÚÉó-ÊµÖÊÉó²éµÄÉúÐ§	518000 ¹ã¶«Ê¡ÉîÛÚÊÐÇ°º£Éî¸ÛºÏ×÷ÇøÇ°ÍåÒ»Â·1ºÅA¶°201ÊÒ(Èë×¤ÉîÛÚÊÐÇ°º£ÉÌÎñÃØÊéÓÐÏÞ¹«Ë¾)	±¾·¢Ã÷ÊÊÓÃÓÚ¼ÆËã»ú¼¼ÊõÁìÓò£¬Ìá¹©ÁËÒ»ÖÖÍâ»ãFeedÏµÍ³µÄÈÝÔÖ·½·¨¼°×°ÖÃ£¬ËùÊöÍâ»ãFeedÏµÍ³µÄÈÝÔÖ·½·¨°üÀ¨£º»ñÈ¡Íâ»ãÊÐ³¡ÖÐ¶à¸öÁ÷¶¯ÐÔÌá¹©ÉÌµÄ±¨¼Û£»ÔÚ¶à¸öÁ÷¶¯ÐÔÌá¹©ÉÌµÄ±¨¼ÛÖÐ£¬¹ýÂËÒì³£µÄ±¨¼Û£¬µÃµ½ÓàÏÂµÄ±¨¼Û£»ÀûÓÃ±¨¼ÛÈÚºÏËã·¨ÈÚºÏÓàÏÂµÄ±¨¼Û£¬Éú³ÉºÏÀí±¨¼Û¡£±¾·¢Ã÷½â¾öÁËÄ¿Ç°Íâ»ãFeedÏµÍ³Ö»²ÉÓÃÒ»¸ö±¨¼ÛÔ´£¬ÄÑÒÔ±£Ö¤Íâ»ãÏµÍ³µÄ¿É¿¿ÐÔÒÔ¼°ÎÈ¶¨ÐÔµÄÎÊÌâ¡£ÆäÓÐÒæÐ§¹ûÔÚÓÚÁ½·½Ãæ£¬Ò»·½Ãæ£¬Í¨¹ý¶Ô½Ó¶à¸öÁ÷¶¯ÐÔÌá¹©ÉÌ£¬ÓÉÓÚ²ÉÓÃÁË¶…	Í¶×Ê
Ò»ÖÖÖ§¸¶ÖÕ¶ËÇ¶ÈëÊ½Èí¼þ²âÊÔ¹¤×÷Á¿Í³¼ÆÏµÍ³	¸£½¨ÈðÖ®¸¶Î¢µç×ÓÓÐÏÞ¹«Ë¾	2016-12-22	2017-06-13	CN106844196A	Ö÷·ÖÀàºÅ£ºG06F11/36(2006.01)I	ÔÚÉó-ÊµÖÊÉó²éµÄÉúÐ§	350003 ¸£½¨Ê¡¸£ÖÝÊÐ¹ÄÂ¥ÇøÈí¼þ´óµÀ89ºÅ¸£ÖÝÈí¼þÔ°BÇø2ºÅÂ¥¶þ²ãÑÐ·¢Â¥	±¾·¢Ã÷Éæ¼°Ò»ÖÖÖ§¸¶ÖÕ¶ËÇ¶ÈëÊ½Èí¼þ²âÊÔ¹¤×÷Á¿Í³¼ÆÏµÍ³£¬¸ÃÏµÍ³·Ö±ðÓëÈô¸ÉÌ¨´îÔØÓÐ´ý²âÊÔÈí¼þµÄÖ§¸¶ÖÕ¶ËÅäºÏ£¬°üÀ¨£ºÒ»²âÊÔÈÎÎñ»®·ÖÄ£¿é¡¢Ò»µ¥Ôª²âÊÔÓÃÀý¿ØÖÆÄ£¿é¡¢Ò»×ÛºÏ²âÊÔÓÃÀý¿ØÖÆÄ£¿é¡¢Ò»µ¥Ôª²âÊÔÄ£¿é¡¢Ò»×ÛºÏ²âÊÔÄ£¿é¡¢Ò»Ê±¼äÍ³¼ÆÄ£¿é¡¢Ò»ÈÎÎñ´ÎÊýÍ³¼ÆÄ£¿é¡¢Ò»Êý¾ÝÉÏ´«µ¥ÔªÒÔ¼°Ò»×Ü²âÊÔ¹¤×÷Á¿Í³¼Æµ¥Ôª¡£±¾·¢Ã÷ËùÌá¹©µÄÖ§¸¶ÖÕ¶ËÇ¶ÈëÊ½Èí¼þ²âÊÔ¹¤×÷Á¿Í³¼ÆÏµÍ³£¬Ìá¹©ÁËÒ»ÖÖÒ×ÓÃ¿ÉÐÐµÄ¡¢¾«Ï¸»¯µÄ¡¢ÓÐ×ã¹»Êý¾ÝÖ§³ÖµÄÊÊÓÃÓÚÇ¶ÈëÊ½È…	Êý¾Ý·ÖÎö
Ò»ÖÖ½ðÈÚIC¿¨È¦´æÈ¦Ìá²âÊÔÏµÍ³	¹ãÖÝÖÇ»Û³ÇÊÐ·¢Õ¹ÑÐ¾¿Ôº	2016-12-27	2017-06-13	CN106844199A	Ö÷·ÖÀàºÅ£ºG06F11/36(2006.01)I	ÔÚÉó-ÊµÖÊÉó²éµÄÉúÐ§	510800 ¹ã¶«Ê¡¹ãÖÝÊÐ»¨¶¼ÇøÌì¹óÂ·88ºÅA×ù6Â¥	±¾·¢Ã÷Ìá¹©Ò»ÖÖ½ðÈÚIC¿¨È¦´æÈ¦Ìá²âÊÔÏµÍ³£¬°üÀ¨£ºÊ¶±ð×°ÖÃ¸ù¾ÝÔ¤ÉèµÄÐ­ÒéÊ¶±ð½ðÈÚIC¿¨£¬Èç¹ûÊ¶±ð³É¹¦Ôò½øÐÐÏÂÒ»²½£¬Èç¹ûÊ¶±ðÊ§°ÜÔò½áÊø²Ù×÷£»½ðÈÚIC¿¨ÓëPCÖÕ¶ËÍ¨¹ýÊ¶±ð×°ÖÃµçÁ¬½Ó£¬ÖÕ¶ËÓë½ðÈÚIC¿¨Ö®¼ä½øÐÐÍâ²¿ÈÏÖ¤¼°ÄÚ²¿ÈÏÖ¤£¬¼°PINÈÏÖ¤£¬Èç¹ûÈÏÖ¤³É¹¦Ôò½øÐÐÏÂÒ»²½£¬Èç¹ûÈÏÖ¤Ê§°ÜÔò½áÊø²Ù×÷£¬²¢·¢ËÍÌáÊ¾ÐÅÏ¢ÖÁPCÖÕ¶Ë£»¸ùÓÚÓÃ»§Ö¸Áî½øÐÐÈ¦´æ»òÈ¦Ìá£¬ÈôÎªÈ¦´æÔò½øÐÐÈ¦´æ³õÊ¼»¯²Ù×÷£¬³õÊ¼»¯Ê§°ÜÔò½áÊø²Ù×÷£¬Èô³õÊ¼»¯³É¹¦£¬ÔòÏÔÊ¾È¦´æ…	Êý¾Ý·ÖÎö
Ò»ÖÖ»ùÓÚ½ðÈÚÏµÍ³µÄ²âÊÔ·½·¨¼°×°ÖÃ	ÖÐ¹úÒøÁª¹É·ÝÓÐÏÞ¹«Ë¾	2016-12-30	2017-06-06	CN106802864A	Ö÷·ÖÀàºÅ£ºG06F11/36(2006.01)I	ÔÚÉó-ÊµÖÊÉó²éµÄÉúÐ§	200135 ÉÏº£ÊÐÆÖ¶«ÐÂÇøº¬Ð¦Â·36ºÅ	±¾·¢Ã÷Éæ¼°¼ÆËã»ú¼¼ÊõÁìÓò£¬ÓÈÆäÉæ¼°Ò»ÖÖ»ùÓÚ½ðÈÚÏµÍ³µÄ²âÊÔ·½·¨¼°×°ÖÃ£¬ÓÃÒÔÌá¸ßÈí¼þ²âÊÔÊ±Ç°Ì¨ÏµÍ³ÇëÇóÊý¾ÝµÄËÙ¶È¼°¼õÇáºóÌ¨ÏµÍ³Ñ¹Á¦£¬°üÀ¨£ºÔÚÇ°Ì¨ÏµÍ³ºÍºóÌ¨ÏµÍ³Ö®¼äÔö¼ÓÁËÒ»¸öÊý¾ÝÄ£Äâ²ã£¬Ç°Ì¨ÏµÍ³ÏòÊý¾ÝÄ£Äâ²ã·¢ËÍ·þÎñµ÷ÓÃÇëÇó£¬µ±Êý¾ÝÄ£Äâ²ã¸ù¾Ý·þÎñµ÷ÓÃÇëÇóÈ·¶¨Êý¾ÝÄ£Äâ²ã´æ´¢ÓÐ·þÎñµ÷ÓÃÇëÇó¶ÔÓ¦µÄÏìÓ¦ÄÚÈÝ£¬ÔòÖ±½Ó´ÓÊý¾ÝÄ£Äâ²ãÖÐ»ñÈ¡ÏìÓ¦ÄÚÈÝ²¢·´À¡ÖÁÇ°Ì¨ÏµÍ³£¬ÓÉÓÚÊý¾ÝÄ£Äâ²ãÔ¤ÏÈ´æ´¢ÁËÇ°Ì¨ÏµÍ³ÐèÒªÇëÇóµÄÊý¾Ý£¬Òò´ËÊý¾…	Êý¾Ý·ÖÎö
Ò»ÖÖ½»Ò×²âÊÔ·½·¨¼°×°ÖÃ	ÖÐ¹úÒøÁª¹É·ÝÓÐÏÞ¹«Ë¾	2016-12-30	2017-06-09	CN106815148A	Ö÷·ÖÀàºÅ£ºG06F11/36(2006.01)I	ÔÚÉó-ÊµÖÊÉó²éµÄÉúÐ§	200135 ÉÏº£ÊÐÆÖ¶«ÐÂÇøº¬Ð¦Â·36ºÅ	±¾·¢Ã÷¹«¿ªÁËÒ»ÖÖ½»Ò×²âÊÔ·½·¨¼°×°ÖÃ£¬È·¶¨½ÓÊÕµ½µÄ²âÊÔÇëÇó±¨ÎÄµÄÊôÐÔ£¬ËùÊöÊôÐÔ°üÀ¨ËùÊö²âÊÔÇëÇó±¨ÎÄÖÐµÄ¸÷¸öÓòÒÔ¼°Ã¿¸öÓòµÄÖµ£»½«²âÊÔ±¨ÎÄµÄÊôÐÔÓëÔ¤ÉèµÄÖÁÉÙÒ»¸ö½»Ò×ÀàÐÍÄ£°å½øÐÐÆ¥Åä£»ÈôÆ¥Åä³É¹¦£¬Ôò½«Æ¥Åä³É¹¦µÄ½»Ò×ÀàÐÍÄ£°åÈ·¶¨Îª²âÊÔÄ£°å£¬È·¶¨ËùÊö²âÊÔÄ£°å¶ÔÓ¦µÄ²âÊÔÓ¦´ð±¨ÎÄ£¬½«ËùÊö²âÊÔÓ¦´ð±¨ÎÄ×÷Îª²âÊÔ½á¹û£»ÈôÆ¥ÅäÊ§°Ü£¬Ôò½«²âÊÔ½á¹ûÈ·¶¨Îª½»Ò×Ê§°Ü¡£±¾·¢Ã÷ÊµÊ©ÀýÌá¹©µÄ½»Ò×²âÊÔ·½·¨¼°×°ÖÃ£¬½»Ò×ÀàÐÍÄ£°å¸ù¾Ý¶ÔÓ¦µÄ½…	Êý¾Ý·ÖÎö
ÒøÐÐºóÌ¨ÈÎÎñÅÜÅúÊ±¼äµÄÏà¹ØÐÔ·ÖÎö·½·¨¼°×°ÖÃ	Çå»ª´óÑ§	2017-01-17	2017-06-13	CN106844152A	Ö÷·ÖÀàºÅ£ºG06F11/30(2006.01)I	ÔÚÉó-ÊµÖÊÉó²éµÄÉúÐ§	100084 ±±¾©ÊÐº£µíÇøÇå»ªÔ°	±¾·¢Ã÷¹«¿ªÁËÒ»ÖÖÒøÐÐºóÌ¨ÈÎÎñÅÜÅúÊ±¼äµÄÏà¹ØÐÔ·ÖÎö·½·¨¼°×°ÖÃ£¬ÆäÖÐ£¬·½·¨°üÀ¨£º²É¼¯ÒøÐÐÏµÍ³µÄ½»Ò×ÏµÍ³ÐÅÏ¢£¬ÆäÖÐ£¬½»Ò×ÏµÍ³ÐÅÏ¢°üÀ¨ÏµÍ³×´Ì¬Á¿ÐÅÏ¢ºÍÒøÐÐÖÜÆÚÐÔÈÎÎñÅÜÅúÊ±¼ä£»¸ù¾Ý½»Ò×ÏµÍ³ÐÅÏ¢ºÍµ±Ç°½»Ò×Çé¿öµÃµ½ÅÜÅúÊ±¼äÏà¹ØÐÔ·ÖÎöÄ£ÐÍµÄÊý¾Ý¼¯£»¸ù¾ÝÅÜÅúÊ±¼äÏà¹ØÐÔ·ÖÎöÄ£ÐÍµÄÊý¾Ý¼¯½¨Á¢ÅÜÅúÊ±¼äÏà¹ØÐÔ·ÖÎöÄ£ÐÍ£¬ÒÔµÃµ½Ïà¹ØÐÔ·ÖÎö½á¹û¡£¸Ã·½·¨¿ÉÒÔ½¨Á¢ÅÜÅúÊ±¼äÏà¹ØÐÔ·ÖÎöÄ£ÐÍ£¬´Ó¶øÍÆ²â³öÒøÐÐºóÌ¨ÈÎÎñÅÜÅúÊ±¼äÓëÖÚ¶àÏµÍ³×´Ì¬Á…	Êý¾Ý·ÖÎö
Ö§¸¶ÏµÍ³ÏûÏ¢¿ØÖÆºÍ´¦Àí·½·¨¡¢×°ÖÃ	±±¾©³Û²¨ÐÅÏ¢¹¤³ÌÓÐÏÞ¹«Ë¾	2017-03-15	2017-07-21	CN106970846A	Ö÷·ÖÀàºÅ£ºG06F9/54(2006.01)I	ÔÚÉó-ÊµÖÊÉó²éµÄÉúÐ§	100097 ±±¾©ÊÐº£µíÇø×ÏÖñÔºÂ·116ºÅ¼ÎºÀ¹ú¼ÊÖÐÐÄC×ù5²ã510ÊÒ	±¾·¢Ã÷Ìá¹©ÁËÒ»ÖÖÖ§¸¶ÏµÍ³ÏûÏ¢¿ØÖÆºÍ´¦Àí·½·¨¡¢×°ÖÃ£¬Éæ¼°ÒøÐÐÖ§¸¶ÏµÍ³Êý¾Ý´¦Àí¼¼ÊõÁìÓò¡£·½·¨°üÀ¨£º´ÓÖ§¸¶ÏµÍ³µÄÏûÏ¢ÖÐ¼ä¼þÖÐÂÖÑ¯¶ÁÈ¡ÏûÏ¢£¬»ñÈ¡´ý´¦ÀíÒµÎñ±¨ÎÄ£»ÔÚµ±Ç°Ïß³ÌÊýÐ¡ÓÚ×î´óÏß³ÌÊýãÐÖµÊ±£¬¶ÁÈ¡´ý´¦ÀíÒµÎñ±¨ÎÄ£»½«´ý´¦ÀíÒµÎñ±¨ÎÄÐ´ÈëÀ´±¨±í£»ÈôÐ´ÈëÀ´±¨±íÎ´³öÏÖÒì³££¬Æô¶¯ÐÂÏß³Ì£¬¶Ô´ý´¦ÀíÒµÎñ±¨ÎÄ½øÐÐ´¦Àí£»ÈôÐ´ÈëÀ´±¨±í³öÏÖÒì³££¬ÇÒÒì³£´ÎÊý´óÓÚµÈÓÚÔ¤ÏÈÉèÖÃµÄÒì³£´ÎÊýãÐÖµ£¬Ôò½«´ý´¦ÀíÒµÎñ±¨ÎÄ·ÅÈë´íÎó¶ÓÁÐ£»ÈôÐ´ÈëÀ…	Ö§¸¶
»úÆ÷ÈË×ÔÎÒÒâÊ¶¼ÛÖµµÄÉÌÒµÄ£Ê½	ÉÏº£ÔÆ½£ÐÅÏ¢¼¼ÊõÓÐÏÞ¹«Ë¾	2017-04-10	2017-07-28	CN106991574A	Ö÷·ÖÀàºÅ£ºG06Q30/00(2012.01)I	ÔÚÉó-ÊµÖÊÉó²éµÄÉúÐ§	200433 ÉÏº£ÊÐÑîÆÖÇøÓª¿ÚÂ·866Åª1ºÅÂ¥202ÊÒ	±¾·¢Ã÷¹«¿ªÁË»úÆ÷ÈË×ÔÎÒÒâÊ¶¼ÛÖµµÄÉÌÒµÄ£Ê½£¬Ö÷ÒªÓÉ»úÆ÷ÈËÉú²úÉÌ¡¢»úÆ÷ÈË²úÆ·¡¢¸öÈËÓÃ»§¡¢ÔÆ·þÎñÆ½Ì¨ÉÌ¡¢Êý¾ÝÒøÐÐÎå²¿·Ö×é³É¡£ËùÊö»úÆ÷ÈËÉú²úÉÌ¸ºÔðÖÆÔì¾ßÓÐ×ÔÎÒÒâÊ¶ÄÜÁ¦µÄ»úÆ÷ÈË£¬×÷Îª¹«Ë¾µÄ»úÆ÷ÈË²úÆ·ÏúÊÛ¸ø¸öÈËÓÃ»§¡£»úÆ÷ÈËÓë¸öÈËÓÃ»§ÔÚÏà´¦ÖÐ²úÉú×ÔÎÒÒâÊ¶¡£ËùÊöÔÆ·þÎñÆ½Ì¨ÉÌÎª¸öÈËÓÃ»§Ìá¹©»úÆ÷ÈËÏà¹ØµÄÊý¾Ý·þÎñ£¬°üÀ¨£º´æ´¢¡¢±¸·Ý¡¢·ÖÎö¡¢Ô¤²â¡¢¸üÐÂµÈ¡£ËùÊöÊý¾ÝÒøÐÐÓÃÓÚÊÕÈ¡¸öÈËÓÃ»§¹ºÂòÊý¾Ý·þÎñµÄ·ÑÓÃ£¬´ý½»Ò×¾­¸öÈËÓÃ»§È·È…	Ö§¸¶
Ò»ÖÖÒøÐÐ¹¤×÷ÈËÔ±ÓÃÐÂÐÍÊó±êÉè±¸	Ã·æ¼	2017-05-29	2017-08-08	CN107025005A	Ö÷·ÖÀàºÅ£ºG06F3/0354(2013.01)I	ÔÚÉó-ÊµÖÊÉó²éµÄÉúÐ§	225500 ½­ËÕÊ¡Ì©ÖÝÊÐ½ªÑßÇøÄÏÔ·ÐÂ´å18ºÅÂ¥203ÊÒ	±¾·¢Ã÷¹«¿ªÁËÒ»ÖÖÒøÐÐ¹¤×÷ÈËÔ±ÓÃÐÂÐÍÊó±êÉè±¸£¬°üº¬Ò»ÒÆ¶¯Â·¾¶´«¸ÐÆ÷£¬ÒÆ¶¯Â·¾¶´«¸ÐÆ÷ÓëÒ»ÐÅºÅÂË²¨µçÂ·Á¬½Ó£¬ÐÅºÅÂË²¨µçÂ·ÓëÒ»ÐÅºÅ·Å´óÄ£¿éÁ¬½Ó£¬ÐÅºÅ·Å´óÄ£¿éÓëÒ»µ¥Æ¬»ú¿ØÖÆÄ£¿éÁ¬½Ó£¬µ¥Æ¬»ú¿ØÖÆÄ£¿éÓëÒ»Êý¾Ý×ª»»´«ÊäÄ£¿éÁ¬½Ó£¬Êý¾Ý×ª»»´«ÊäÄ£¿éÓëÒ»USB½ÓÍ·Á¬½Ó£¬Éè±¸ÖÐ»¹ÉèÓÐÒ»Êý¾Ý²É¼¯Ä£¿é£¬Êý¾Ý²É¼¯Ä£¿éÓëÒ»¿ØÖÆÄ£¿éÁ¬½Ó£¬¿ØÖÆÄ£¿éÓëµ¥Æ¬»ú¿ØÖÆÄ£¿éÏàÁ¬½Ó£¬Éè±¸ÖÐ»¹ÉèÓÐÒ»µçÑ¹×ª»»Ä£¿é£¬µçÑ¹×ª»»Ä£¿éÓëÉÏÊö²¿¼þÏàÁ¬½Ó¡£±¾·¢Ã÷…	Êý¾Ý·ÖÎö
»ùÓÚ¼ÓÃÜÉè±¸ÌØÕ÷ÐÅÏ¢µÄÅäÖÃÊý¾Ý×Ô¶¯Ð£Ñé·½·¨	¿¨Ë¹¿ÂÐÅºÅÓÐÏÞ¹«Ë¾	2017-06-12	2017-11-17	CN107357670A	Ö÷·ÖÀàºÅ£ºG06F11/07(2006.01)I	ÔÚÉó-ÊµÖÊÉó²éµÄÉúÐ§	200070 ÉÏº£ÊÐÕ¢±±ÇøÌìÄ¿ÖÐÂ·428ºÅ¿­ÐýÃÅ´óÏÃ27²ãC/DÊÒ	±¾·¢Ã÷Éæ¼°Ò»ÖÖ»ùÓÚ¼ÓÃÜÉè±¸ÌØÕ÷ÐÅÏ¢µÄÅäÖÃÊý¾Ý×Ô¶¯Ð£Ñé·½·¨£¬²ÉÓÃÁË°²È«Ëã·¨½«Éè±¸µÄÌØÕ÷ÐÅÏ¢Éú³ÉÐ£ºË×Ö²¢Í¨¹ý±È¶ÔÐ£ºË×ÖµÄÒ»ÖÂÐÔÀ´ÅÐ¶ÏÅäÖÃµ½Éè±¸ÉÏµÄÊý¾ÝÊÇ·ñÕýÈ·£¬ËùÊöµÄ·½·¨¾ßÌå°üÀ¨ÒÔÏÂ²½Öè£º1)Éú³ÉÀëÏßÐ£ºË×Ö£»2)Ìí¼ÓÌØÕ÷ÐÅÏ¢µ½ÐèÅäÖÃµÄÊý¾ÝÖÐ£»3)Éú³ÉÔÚÏßÐ£ºË×Ö£»4)ÔÚÏßÐ£ºË£º½«µ¼ÈëµÄÐ£ºË×ÖÓëÔÚÏßÉú³ÉµÄÐ£ºË×Ö½øÐÐ±È¶Ô£¬Èç¹ûÒ»ÖÂ£¬Ôò³õÊ¼»¯³É¹¦£¬·ñÔò£¬³õÊ¼»¯Ê§°Ü¡£ÓëÏÖÓÐ¼¼ÊõÏà±È£¬±¾·¢Ã÷¾ßÓÐÌá¸ßÁË¹¤×÷Ð§ÂÊÒ²±ÜÃâÁËÈË¹…	°²È«
Ò»ÖÖ½ðÈÚÖÕ¶ËµÄÒì³£×´Ì¬¼à¿Ø·½·¨¼°½ðÈÚÖÕ¶Ë	¹ã¶«Íø½ð¿Ø¹É¹É·ÝÓÐÏÞ¹«Ë¾	2017-07-06	2017-12-22	CN107506289A	Ö÷·ÖÀàºÅ£ºG06F11/32(2006.01)I	ÔÚÉó-ÊµÖÊÉó²éµÄÉúÐ§	510000 ¹ã¶«Ê¡¹ãÖÝÊÐÌìºÓÇøÖé½­¶«Â·28ºÅÔ½Ðã½ðÈÚ´óÏÃ19-20²ã	±¾·¢Ã÷Éæ¼°Ò»ÖÖ½ðÈÚÖÕ¶ËµÄÒì³£×´Ì¬¼à¿Ø·½·¨¼°½ðÈÚÖÕ¶Ë¡£¸Ã·½·¨°üÀ¨£º»ñÈ¡¸÷¸ö¹¦ÄÜÄ£¿éµÄ¹¤×÷×´Ì¬ÐÅÏ¢£»¸ù¾ÝËùÊö¹¤×÷×´Ì¬ÐÅÏ¢Éú³É¶ÔÓ¦µÄÒì³£×´Ì¬ÐÅÏ¢´úÂë£»¸ù¾ÝËùÊöÒì³£×´Ì¬ÐÅÏ¢´úÂë´ÓÔ¤ÉèµÄÒì³£ÐÅÏ¢µÈ¼¶¹æÔòÖÐÆ¥Åä³ö¶ÔÓ¦µÄ¹ÊÕÏµÈ¼¶£»¸ù¾ÝËùÊö¹ÊÕÏµÈ¼¶Æ¥Åä³ö¶ÔÓ¦µÄ´¦Àí·½°¸£¬²¢Ïò´¦ÀíÐ¾Æ¬·¢ËÍËùÊö´¦Àí·½°¸£¬ÒÔÊ¹ËùÊö´¦ÀíÐ¾Æ¬Ö´ÐÐËùÊö´¦Àí·½°¸¡£±¾·¢Ã÷ÔÚ´¦ÀíÐ¾Æ¬Ö÷¿Ø°åÉÏµ¥¶ÀÉèÖÃÒ»¸öÖ÷¿Ø°åµÄ¼à¿Ø¹ÜÀíÐ¾Æ¬£¬¼à¿ØÖ÷¿Ø°åÉÏ¼¯³É/Íâ½ÓµÄ…	Êý¾Ý·ÖÎö
Ò»ÖÖµç×Ó³äÖµÏµÍ³µÄÐéÄâ³äÖµ²âÊÔÏµÍ³¼°·½·¨	Öéº£½ðÉ½ÍøÂçÓÎÏ·¿Æ¼¼ÓÐÏÞ¹«Ë¾	2017-08-11	2017-12-15	CN107480064A	Ö÷·ÖÀàºÅ£ºG06F11/36(2006.01)I	ÔÚÉó-ÊµÖÊÉó²éµÄÉúÐ§	519000 ¹ã¶«Ê¡Öéº£ÊÐ¼ª´ó¾°É½Â·Á«É½Ïï8ºÅ½ðÉ½Èí¼þ´óÏÃ	±¾·¢Ã÷°üÀ¨Ò»ÖÖµç×Ó³äÖµÏµÍ³µÄÐéÄâ³äÖµ²âÊÔÏµÍ³¼°·½·¨£¬ÆäÌØÕ÷ÔÚÓÚ£¬ÓÃÓÚÊµÏÖ£ºÄ£ÄâµÚÈý·½Ö§¸¶µÄÖ§¸¶Æ½Ì¨²¢Ìá¹©»ù´¡ÍøÂçÍ¨ÐÅ·þÎñ£»¶ÔÖ¤Êé½øÐÐ¼ÓÃÜ¡¢½âÃÜ¼°·¢ËÍ£»Ä£Äâ¶à¸ö²»Í¬µÚÈý·½Ö§¸¶Æ½Ì¨µÄÖ§¸¶ÐÐÎª¼°Ö§¸¶¹¦ÄÜ£»±à¼­²¢Éú³É²âÊÔ°¸Àý£¬²¢¿ØÖÆ²âÊÔ°¸ÀýËùÊ¹ÓÃµÄ¶ÔÓ¦Ä£¿é½øÐÐ²âÊÔ£»Ìá¹©½»»¥½çÃæÓÃÓÚ¶Ô²âÊÔ°¸Àý½øÐÐ²é¿´¡¢±à¼­¼°Î¬»¤£»¶ÔÖ§¸¶½á¹û½øÐÐ±àÂë£¬²¢Éú³É²âÊÔµÄ×îÖÕ»Ø¸´Ð§¹û½øÐÐ»ØËÍ¡£±¾·¢Ã÷µÄÓÐÒæÐ§¹ûÎª£º½â¾öÁË¸÷Æ½Ì¨Ö®¼äÍøÂ…	Ö§¸¶
Ò»ÖÖ½ðÈÚÀà²úÆ·µÄ²âÊÔ·ÖÎö·½·¨¼°×°ÖÃ	ÖÐ¹úÒøÐÐ¹É·ÝÓÐÏÞ¹«Ë¾	2017-08-18	2017-12-15	CN107480067A	Ö÷·ÖÀàºÅ£ºG06F11/36(2006.01)I	ÔÚÉó-ÊµÖÊÉó²éµÄÉúÐ§	100818 ±±¾©ÊÐÎ÷³ÇÇø¸´ÐËÃÅÄÚ´ó½Ö1ºÅ	±¾·¢Ã÷¹«¿ªÁËÒ»ÖÖ½ðÈÚÀà²úÆ·µÄ²âÊÔ·ÖÎö·½·¨¼°×°ÖÃ£¬¶Ô²úÆ·½øÐÐ²âÊÔ·ÖÎöÊ±£¬Ê×ÏÈÈ·¶¨³ö´ý²âÊÔÄ£ÐÍµÄ²âÊÔÂß¼­£¬²¢¸ù¾Ý²âÊÔÂß¼­´Ó´ý²âÊÔÄ£ÐÍÖÐ³éÈ¡²âÊÔÒªËØºÍ²âÊÔÒªËØµÄÒªËØÖµ£¬È»ºóÔÙ¸ù¾ÝÔ¤ÉèµÄ³¡¾°¹æÔò¡¢³éÈ¡µ½µÄ²âÊÔÒªËØºÍÃ¿¸ö²âÊÔÒªËØµÄÒªËØÖµ£¬Éú³É²âÊÔ³¡¾°£»ÒÀ¾Ý¸Ã²âÊÔ³¡¾°Éú³É²âÊÔ°¸Àý¡£ÓÉ´Ë£¬ÊµÏÖÁË×Ô¶¯»¯µÄ²âÊÔ·ÖÎö£¬²âÊÔ·ÖÎöµÃµ½µÄ²âÊÔÒªËØÈ«ÃæÍêÕû£¬²âÊÔ·ÖÎö¹ý³ÌºÄÊ±¶Ì¡¢Ð§ÂÊ¸ß£¬²¢ÇÒÍ¨¹ý×Ô¶¯µÄ»°¶Ô²âÊÔÒªËØµÄÒªËØÖµ½øÐÐÅ…	Êý¾Ý·ÖÎö
Ò»ÖÖ¹©Ó¦Á´×Ê½ð¼à¹ÜÏµÍ³¼°·½·¨	ºÌ°ºÐÅÏ¢¿Æ¼¼£¨ÉÏº££©ÓÐÏÞ¹«Ë¾	2017-08-25	2018-01-05	CN107545417A	Ö÷·ÖÀàºÅ£ºG06Q20/08(2012.01)I	ÔÚÉó-ÊµÖÊÉó²éµÄÉúÐ§	200000 ÉÏº£ÊÐ·îÏÍÇøº£ÍåÕòÎåËÄ¹«Â·4399ºÅ38´±2363ÊÒ	±¾·¢Ã÷Ìá³öÁËÒ»ÖÖ¹©Ó¦Á´×Ê½ð¼à¹ÜÏµÍ³¼°·½·¨£¬°üÀ¨ÆóÒµ´úÊÕ¸¶Æ½Ì¨¡¢´úÊÕ¸¶Ö§³ÅÏµÍ³¡¢´úÊÕ¸¶ºóÌ¨¹ÜÀíÏµÍ³¡¢´úÊÕ¸¶Êý¾Ý¿â¡¢´úÊÕ¸¶»º´æÊý¾Ý¿â¡¢ÒøÆóÖ±ÁªÇ°ÖÃ·þÎñÆ÷¡£ÆóÒµ·¢ÆðÈÚ×ÊÉêÇë²¢Ìá½»Ó¦ÊÕÕË¿îÃ÷Ï¸£¬×Ê½ð»ú¹¹·Å¿îºóÏµÍ³ÔÚ»ñÈ¡µ½·Å¿îÍ¨Öª£¬ÏµÍ³¸ù¾ÝÈÚ×ÊÉêÇëÊ±£¬Ìá¹©µÄÓ¦ÊÕÕË¿î£¬·¢Æð¶¨ÏòÖ§¸¶£¬ÏµÍ³Éú³É×ªÕË¶©µ¥£¬µ÷ÓÃÒøÆóÖ±Áª½Ó¿ÚÖ¸Áî£¬Í¬²½Ö§¸¶½á¹û²éÑ¯½Ó¿Ú£¬Í¬²½×ªÕË½á¹û¡£±¾·¢Ã÷ÊµÏÖÁË¶ÔÈÚ×ÊÆóÒµ×Ê½ðÕË»§µÄ¼à¿Ø£¬Í¬Ê±Ò²È·±£ÁËÆ…	°²È«
Ò»ÖÖÓÃÓÚÒøÐÐµÄÊý¾Ý´¦ÀíÏµÍ³	ÖÐ¹ú¹â´óÒøÐÐ¹É·ÝÓÐÏÞ¹«Ë¾ÐÅÓÃ¿¨ÖÐÐÄ	2017-09-07	2018-03-06	CN107766175A	Ö÷·ÖÀàºÅ£ºG06F11/14(2006.01)I	ÔÚÉó-ÊµÖÊÉó²éµÄÉúÐ§	100040 ±±¾©ÊÐÊ¯¾°É½ÇøÕþ´ïÂ·6ºÅÔº1ºÅÂ¥ÖÐ»ÝÎõÔª´óÏÃ	±¾·¢Ã÷ÊµÊ©ÀýÌá¹©Ò»ÖÖÓÃÓÚÒøÐÐµÄÊý¾Ý´¦ÀíÏµÍ³£¬Éæ¼°Êý¾Ý´¦ÀíÁìÓò¡£ÆäÖÐ£¬ËùÊöÏµÍ³°üÀ¨£ºÖ÷Êý¾ÝÖÐÐÄ¡¢ÔÖ±¸Êý¾ÝÖÐÐÄ£¬ÒÔ¼°ÓëËùÊöÖ÷Êý¾ÝÖÐÐÄºÍËùÊöÔÖ±¸Êý¾ÝÖÐÐÄÁ¬½ÓµÄ×ª·¢½Úµã£¬ËùÊö×ª·¢½Úµã£¬ÓÃÓÚÊµÊ±½ÓÊÕ½»Ò×Êý¾Ý£¬²¢½«ËùÊö½»Ò×Êý¾ÝÖÐµÄ¿¨ºÅÓëÔ¤ÉèµÄÍ¨ÐÅÂ·ÓÉ¿ØÖÆ±íÖÐµÄ¿¨ºÅ¶Î½øÐÐÆ¥Åä£¬»ñµÃËùÊö¿¨ºÅËùÊôµÄ¿¨ºÅ¶Î£¬ÔÙ¸ù¾ÝËùÊöÍ¨ÐÅÂ·ÓÉ¿ØÖÆ±íÖÐ¿¨ºÅ¶ÎÓëÂ·ÓÉÐÅÏ¢µÄ¶ÔÓ¦¹ØÏµÈ·¶¨ËùÊö½»Ò×Êý¾Ý×ª·¢µÄÂ·ÓÉÐÅÏ¢£¬ÔÙ¸ù¾ÝËùÊöÂ·ÓÉÐÅÏ¢½«ËùÊö½…	Êý¾Ý·ÖÎö
Ò»ÖÖÓÃÓÚ»¥ÁªÍø½ðÈÚÆ½Ì¨µÄ¸öÈËÊý¾Ý¹²ÏíÏµÍ³ºÍ·½·¨	¹ú¼Ò¼ÆËã»úÍøÂçÓëÐÅÏ¢°²È«¹ÜÀíÖÐÐÄ	2017-11-06	2018-03-27	CN107844575A	Ö÷·ÖÀàºÅ£ºG06F17/30(2006.01)I	ÔÚÉó-ÊµÖÊÉó²éµÄÉúÐ§	100029 ±±¾©ÊÐ³¯ÑôÇøÔ£ÃñÂ·¼×3ºÅ	±¾·¢Ã÷Ìá¹©ÁËÒ»ÖÖÓÃÓÚ»¥ÁªÍø½ðÈÚÆ½Ì¨µÄ¸öÈËÊý¾Ý¹²ÏíÏµÍ³£¬°üÀ¨Êý¾Ý½ÓÊÕÄ£¿é£¬ÓÃÓÚ½ÓÊÕ»¥ÁªÍø½ðÈÚÆ½Ì¨µÄÉÏ±¨Êý¾Ý£»Êý¾Ý´¦ÀíÄ£¿é£¬ÓÃÓÚ¶ÔÉÏ±¨Êý¾Ý½øÐÐ´¦Àí£¬ÀûÓÃÉÏ±¨Êý¾Ý¸üÐÂ²éÑ¯»º´æÄ£¿éºÍÍ¼Êý¾Ý¿â£¬Í¬Ê±½«ÉÏ±¨Êý¾ÝÐ´ÈëÉÏ±¨Êý¾Ý´æ´¢Êý¾Ý¿â£»ÉÏ±¨Êý¾Ý´æ´¢Êý¾Ý¿â£¬ÓÃÓÚ´æ´¢ÉÏ±¨Êý¾Ý£»Êý¾ÝºËÑéÄ£¿é£¬ÓÃÓÚ»ùÓÚÉÏ±¨Êý¾Ý¶¨ÆÚ¶Ô²éÑ¯»º´æÄ£¿éºÍÍ¼Êý¾Ý¿âÄÚµÄÊý¾Ý½øÐÐÊý¾ÝÒ»ÖÂÐÔºËÑé£»Êý¾Ý²éÑ¯Ä£¿é£¬ÓÃÓÚÎª»¥ÁªÍø½ðÈÚÆ½Ì¨Ìá¹©²éÑ¯½Ó¿Ú£¬¸ù¾Ý»…	½è´û
²ÆÎñÊý¾ÝµÄ´¦Àí·½·¨¡¢×°ÖÃ¡¢½éÖÊ¼°µç×ÓÉè±¸	Ì©¿µ±£ÏÕ¼¯ÍÅ¹É·ÝÓÐÏÞ¹«Ë¾	2017-11-07	2018-03-13	CN107798593A	Ö÷·ÖÀàºÅ£ºG06Q40/00(2012.01)I	ÔÚÉó-ÊµÖÊÉó²éµÄÉúÐ§	100031 ±±¾©ÊÐÎ÷³ÇÇø¸´ÐËÃÅÄÚ´ó½Ö156ºÅ	±¾·¢Ã÷µÄÊµÊ©ÀýÌá¹©ÁËÒ»ÖÖ²ÆÎñÊý¾ÝµÄ´¦Àí·½·¨¡¢×°ÖÃ¡¢½éÖÊ¼°µç×ÓÉè±¸£¬¸Ã²ÆÎñÊý¾ÝµÄ´¦Àí·½·¨°üÀ¨£º¼à²âÓë²ÆÎñÊý¾ÝÏà¹ØµÄÒµÎñ±¨±íÊÇ·ñ·¢ÉúÁË¸üÐÂ²Ù×÷£»ÔÚ¼à²âµ½ËùÊöÒµÎñ±¨±íÖÐµÄÈÎÒ»ÒµÎñ¼ÇÂ¼µÄÊý¾Ý·¢ÉúÁË¸üÐÂ²Ù×÷Ê±£¬¸ù¾ÝËùÊöÈÎÒ»ÒµÎñ¼ÇÂ¼¸üÐÂÇ°µÄÊý¾Ý£¬Éú³É³åÕËÊý¾Ý£»¸ù¾ÝËùÊö³åÕËÊý¾Ý£¬Éú³É³åÕËÆ¾Ö¤¡£±¾·¢Ã÷ÊµÊ©ÀýµÄ¼¼Êõ·½°¸ÄÜ¹»±£Ö¤³åÕËÆ¾Ö¤ÓëÒµÎñÊý¾ÝÏàÒ»ÖÂ£¬½â¾öÁËÒµÎñÏµÍ³ÖÐµÄÊý¾ÝÓë²ÆÎñÏµÍ³ÖÐµÄÆ¾Ö¤²»Ò»ÖÂµÄÎÊÌâ¡£	Êý¾Ý·ÖÎö
Ö§¸¶»Øµ÷µÄ»ñÈ¡·½·¨¡¢×°ÖÃ¼°´æ´¢½éÖÊ	¹ãÖÝÎ¨Æ·»áÍøÂç¼¼ÊõÓÐÏÞ¹«Ë¾	2017-11-13	2018-03-13	CN107797932A	Ö÷·ÖÀàºÅ£ºG06F11/36(2006.01)I	ÔÚÉó-ÊµÖÊÉó²éµÄÉúÐ§	510380 ¹ã¶«Ê¡¹ãÖÝÊÐÀóÍåÇø·¼´å´óµÀÖÐÂ·314ºÅ×Ô±àÖ®¶þ	±¾·¢Ã÷¹«¿ªÁËÒ»ÖÖÖ§¸¶»Øµ÷µÄ»ñÈ¡·½·¨¡¢×°ÖÃ¼°´æ´¢½éÖÊ£¬Ö§¸¶Ä£ÄâÖÕ¶Ë½ÓÊÕµ½Ö§¸¶ÇëÇóÊ±£¬»ñÈ¡ËùÊöÖ§¸¶ÇëÇó¶ÔÓ¦µÄ½»Ò×ÐÅÏ¢£¬µ÷È¡ËùÊöÖ§¸¶ÇëÇó¶ÔÓ¦µÄÖ§¸¶Ä£ÐÍ£¬Í¨¹ýËùÊöÖ§¸¶Ä£ÐÍ½áºÏËùÊö½»Ò×ÐÅÏ¢½øÐÐÖ§¸¶Ä£Äâ£¬»ñÈ¡Ö§¸¶Ä£Äâ½á¹û£¬¸ù¾ÝËùÊöÖ§¸¶Ä£Äâ½á¹ûÉú³ÉÖ§¸¶»Øµ÷ÇëÇó£¬·¢ËÍËùÊöÖ§¸¶»Øµ÷ÇëÇóÖÁÖ§¸¶·þÎñ²âÊÔÖÕ¶Ë£¬ÒÔ¹©ËùÊöÖ§¸¶·þÎñ²âÊÔÖÕ¶Ë¸ù¾ÝËùÊöÖ§¸¶»Øµ÷ÇëÇó½øÐÐÖ§¸¶·þÎñ²âÊÔ¡£±¾·¢Ã÷»¹¹«¿ªÁËÒ»ÖÖÖ§¸¶»Øµ÷µÄ»ñÈ¡·½·¨¡¢×°ÖÃ¼°´æ´¢½…	Ö§¸¶
Ò»ÖÖÒøÐÐÓ¦ÓÃ²âÊÔÊý¾ÝµÄÉú³É·½·¨¼°×°ÖÃ	ÖÐ¹úÒøÐÐ¹É·ÝÓÐÏÞ¹«Ë¾	2017-11-21	2018-04-10	CN107894953A	Ö÷·ÖÀàºÅ£ºG06F11/36(2006.01)I	ÔÚÉó-ÊµÖÊÉó²éµÄÉúÐ§	100818 ±±¾©ÊÐÎ÷³ÇÇø¸´ÐËÃÅÄÚ´ó½Ö1ºÅ	±¾ÉêÇëÌá¹©Ò»ÖÖÒøÐÐÓ¦ÓÃ²âÊÔÊý¾ÝµÄÉú³É·½·¨¼°×°ÖÃ¡£ËùÊö·½·¨°üÀ¨£º½ÓÊÕ¸ù¾ÝÐèÇó²ÎÊýÅäÖÃ±íÊäÈëµÄ²âÊÔÊý¾ÝÐèÇóÐÅÏ¢£¬ËùÊö²âÊÔÊý¾ÝÐèÇóÐÅÏ¢°üÀ¨´øÓÐÒµÎñº¬ÒåµÄÊý×ÖºÍ/»ò×Ö·û£»ÔÚÊý¾Ý¿âÖÐ²éÕÒËùÊö²âÊÔÊý¾ÝÐèÇóÐÅÏ¢¶ÔÓ¦µÄÒµÎñ¹æÔò£¬¸ù¾ÝËùÊöÒµÎñ¹æÔò£¬Éú³É¶ÔÓ¦ÓÚËùÊöÒµÎñ¹æÔòµÄ³õÊ¼²âÊÔÊý¾Ý£»ÕûºÏËùÊö³õÊ¼²âÊÔÊý¾Ý£¬Éú³ÉÒøÐÐÓ¦ÓÃµÄ²âÊÔÊý¾Ý¡£ÀûÓÃ±¾ÉêÇëÖÐ¸÷ÊµÊ©Àý£¬ÊµÏÖÁËÒøÐÐÓ¦ÓÃ²âÊÔÊý¾ÝµÄ×Ô¶¯Éú³É£¬Ìá¸ßÁËÒøÐÐÓ¦ÓÃ²âÊÔÊý¾ÝÉú³ÉµÄÐ§…	Êý¾Ý·ÖÎö
ÒøÐÐÏµÍ³×Ô¶¯»¯²âÊÔ±¨ÎÄµÄ¼ÓÃÜ·½·¨¼°×°ÖÃ	ÖÐ¹úÒøÐÐ¹É·ÝÓÐÏÞ¹«Ë¾	2017-11-21	2018-03-30	CN107861877A	Ö÷·ÖÀàºÅ£ºG06F11/36(2006.01)I	ÔÚÉó-ÊµÖÊÉó²éµÄÉúÐ§	100818 ±±¾©ÊÐÎ÷³ÇÇø¸´ÐËÃÅÄÚ´ó½Ö1ºÅ	±¾·¢Ã÷ÊµÊ©ÀýÌá¹©ÁËÒ»ÖÖÒøÐÐÏµÍ³×Ô¶¯»¯²âÊÔ±¨ÎÄµÄ¼ÓÃÜ·½·¨¼°×°ÖÃ£¬¸Ã·½·¨°üÀ¨£º»ñÈ¡´ýÉÏËÍÖÁ±»²âÒøÐÐÏµÍ³µÄ×Ô¶¯»¯²âÊÔ±¨ÎÄ£»ÈôËùÊö×Ô¶¯»¯²âÊÔ±¨ÎÄÐèÒª¼ÓÃÜ£¬ÔòÓë±»²âÒøÐÐÏµÍ³½»»¥£¬»ñÈ¡ËùÊö×Ô¶¯»¯²âÊÔ±¨ÎÄµÄ¼ÓÃÜËã·¨¼°¼ÓÃÜÃÜÔ¿£»¸ù¾ÝËùÊö¼ÓÃÜËã·¨¼°¼ÓÃÜÃÜÔ¿¶ÔËùÊö×Ô¶¯»¯²âÊÔ±¨ÎÄ½øÐÐ¼ÓÃÜ£»½«¼ÓÃÜºóµÄËùÊö×Ô¶¯»¯²âÊÔ±¨ÎÄÉÏËÍÖÁ±»²âÒøÐÐÏµÍ³¡£¸Ã·½·¨¿ÉÒÔÂú×ãÒøÐÐ×Ô¶¯»¯²âÊÔÊ±µÄ±¨ÎÄ¼ÓÃÜÐèÒª£¬ÎÞÐèÔÚÒøÐÐÏµÍ³×Ô¶¯»¯²âÊÔÖÐÆÁ±Î¼ÓÃÜ±¨Î…	Êý¾Ý·ÖÎö
Ò»ÖÖ½ðÈÚÊý¾Ý·þÎñÆ½Ì¨	ÖÐ¹úÒøÐÐ¹É·ÝÓÐÏÞ¹«Ë¾	2017-11-28	2018-03-23	CN107832463A	Ö÷·ÖÀàºÅ£ºG06F17/30(2006.01)I	ÔÚÉó-ÊµÖÊÉó²éµÄÉúÐ§	100818 ±±¾©ÊÐÎ÷³ÇÇø¸´ÐËÃÅÄÚ´ó½Ö1ºÅ	±¾ÉêÇëÌá¹©ÁËÒ»ÖÖ½ðÈÚÊý¾Ý·þÎñÆ½Ì¨£¬°üÀ¨£ºÊý¾Ý·þÎñÄ£¿éºÍÓ¦ÓÃ¹¦ÄÜÄ£¿é¡£ÆäÖÐ£¬Êý¾Ý·þÎñÄ£¿éÓÃÓÚ´Ó½ðÈÚÏµÍ³ÖÐµÄÔ´Êý¾ÝÎÄ¼þÖÐ»ñÈ¡Ô´Êý¾Ý£¬ÎªËùÊöÔ´Êý¾Ý·ÖÅäÀàÐÍ±êÇ©£¬°´ÕÕËùÊöÀàÐÍ±êÇ©´æ´¢ËùÊöÔ´Êý¾Ý£¬²¢¼ÇÂ¼ËùÊöÔ´Êý¾Ý¡¢ËùÊöÀàÐÍ±êÇ©¡¢ÒÔ¼°ËùÊöÔ´Êý¾ÝµÄ´æ´¢Î»ÖÃµÄ¶ÔÓ¦¹ØÏµ¡£Ó¦ÓÃ¹¦ÄÜÄ£¿éÓÃÓÚ»ùÓÚÊý¾Ý·þÎñÐèÇó£¬Ìá¹©Êý¾Ý·þÎñ½á¹û£¬ËùÊöÊý¾Ý·þÎñ½á¹ûÒÀ¾Ý´æ´¢µÄËùÊöÔ´Êý¾ÝµÃµ½¡£ÓëÏÖÓÐµÄÊý¾Ý²Ö¿âÏà±È£¬ÃæÏòÊý¾Ý¶ø·Ç¾ßÌåÒµÎñ£¬½«Ô´Êý¾…	Êý¾Ý·ÖÎö
Ò»ÖÖ·¿Ì¬½áÕËÐÅÏ¢´¦ÀíÏµÍ³	ÎÂÖÝË÷Ò×Èí¼þ¿ª·¢ÓÐÏÞ¹«Ë¾	2018-01-22	2018-06-22	CN108197941A	Ö÷·ÖÀàºÅ£ºG06Q20/38(2012.01)I	ÔÚÉó-ÊµÖÊÉó²éµÄÉúÐ§	325000 Õã½­Ê¡ÎÂÖÝÊÐ¸ßÐÂ¼¼Êõ²úÒµ¿ª·¢ÇøÎÄ²ýÂ·178ºÅ£¨µçÉÌ´óÏÃ£©401BÊÒ	±¾·¢Ã÷Éæ¼°×Ê½ð½áÕË¼¼ÊõÁìÓò£¬ÓÈÆäÊÇÒ»ÖÖ·¿Ì¬½áÕËÐÅÏ¢´¦ÀíÏµÍ³£¬°üÀ¨Ç°Ì¨µÇÂ½Ä£¿é¡¢°²È«ÑéÖ¤Ä£¿é¡¢ÖÐÑë´¦ÀíÆ÷ÒÔ¼°Êý¾Ý¿â£¬Ç°Ì¨µÇÂ½Ä£¿éµçÐÔÁ¬½Ó°²È«ÑéÖ¤Ä£¿é£¬°²È«ÑéÖ¤Ä£¿éµçÐÔÁ¬½ÓÖÐÑë´¦ÀíÆ÷£¬ÖÐÑë´¦ÀíÆ÷µçÐÔÁ¬½ÓÊý¾Ý¿â£¬ÖÐÑë´¦ÀíÆ÷µçÐÔÁ¬½ÓÓÐÉí·ÝÖ¤Ê¶±ðÄ£¿é£¬ÖÐÑë´¦ÀíÆ÷»¹µçÐÔÁ¬½ÓÓÐ¼ÆÊ±Ä£¿é¡¢Ïû·ÑÔ¤ÊÕÄ£¿é¡¢Ñº½ð½áËãÄ£¿é¡¢Ñº½ð·µ»¹Ä£¿éÒÔ¼°Ïû·ÑÓªÊÕÄ£¿é£¬Ïû·ÑÔ¤ÊÕÄ£¿é°üÀ¨·¿·ÑÖ§¸¶Ä£¿éºÍÑº½ðÖ§¸¶Ä£¿é£¬Ïû·ÑÓªÊÕÄ£¿é¸ù¾Ý·¿·ÑÖ§¸…	Ö§¸¶
Ò»ÖÖ»á¼Æ±¨±íµÄ´¦Àí·½·¨¼°´¦ÀíÏµÍ³	³ÂÔÆÑà	2018-01-31	2019-08-23	CN110163732A	Ö÷·ÖÀàºÅ£ºG06Q40/00(20120101)	ÔÚÉó-¹«¿ª	266109 É½¶«Ê¡ÇàµºÊÐ³ÇÑôÇøÐËÑôÂ·417ºÅ28ºÅÂ¥3µ¥Ôª601»§	±¾·¢Ã÷¹«¿ªÁËÒ»ÖÖ»á¼Æ±¨±íµÄ´¦Àí·½·¨£¬°üÀ¨ÈçÏÂ²½Öè£ºS1.Êý¾Ý¼ì²éÄ£¿é¶Ô±¨±íÊý¾Ý½øÐÐÔ¤´¦Àí£¬¶ÔÊý¾ÝµÄ¸ñÊ½½øÐÐ¼ì²é£»S2.S1ÖÐµÄ±¨±íÊý¾Ý¸ñÊ½³öÏÖ´íÎóÊ±£¬Êý¾Ý±ê¼ÇÄ£¿é½«·ÇÕýÈ·¸ñÊ½½øÐÐ±ê¼Ç£¬´íÎóÌáÊ¾Ä£¿é½øÐÐ´íÎóÌáÐÑ£»Ò»ÖÖ»á¼Æ±¨±íµÄ´¦ÀíÏµÍ³£º°üÀ¨£ºÊý¾Ý¼ì²éÄ£¿é£ºÓÃÓÚ¶ÔÊý¾ÝµÄ¸ñÊ½½øÐÐ¼ì²é£¬¼ì²é±¨±íÔ­Ê¼Êý¾ÝµÄ¸ñÊ½¡¢×Ö·ûÊÇ·ñ´íÎó£»Êý¾Ý±ê¼ÇÄ£¿é£ºÓÃÓÚ¶Ô±¨±íÊý¾ÝÖÐµÄ´íÎó½øÐÐ±ê¼Ç£»±¾·¢Ã÷´ó´ó½ÚÊ¡ÁË²ÆÎñÈËÔ±ÔÚ×ö»á¼Æ±¨±íÊ±µÄ¹¤×…	°²È«
Ò»ÖÖÖÇÄÜPOSÖÕ¶ËËÍ¼ìÒøÐÐ¿¨¼ì²âÖÐÐÄÈÏÖ¤µÄÓ¦ÓÃ	Õã½­µÂ¾°µç×Ó¿Æ¼¼ÓÐÏÞ¹«Ë¾	2018-02-02	2018-08-03	CN108363663A	Ö÷·ÖÀàºÅ£ºG06F11/36(2006.01)I	ÔÚÉó-ÊµÖÊÉó²éµÄÉúÐ§	314000 Õã½­Ê¡¼ÎÐËÊÐÄÏºþÇøÑÇÌ«Â·1052ºÅ	±¾·¢Ã÷Éæ¼°²âÊÔÖÕ¶ËÓ¦ÓÃÁìÓò£¬¾ßÌåµØËµÊÇÒ»ÖÖÖÇÄÜPOSÖÕ¶ËËÍ¼ìÒøÐÐ¿¨¼ì²âÖÐÐÄÈÏÖ¤µÄÓ¦ÓÃ£¬ÆäÌØÕ÷ÔÚÓÚ£¬°üÀ¨£º½»Ò×²âÊÔÖ÷½çÃæ¡¢EMV²ÎÊýÅäÖÃ½çÃæ¡¢AID²ÎÊýÅäÖÃ½çÃæ¡¢¹«Ô¿¹ÜÀíÅäÖÃ½çÃæÒÔ¼°ÖÕ¶Ë²ÎÊýÉèÖÃ½çÃæ£»ËùÊö½»Ò×²âÊÔÖ÷½çÃæÓÃÓÚÊµÏÖ½»Ò×²âÊÔµÄÖ÷Òª²Ù×÷ºÍ²âÊÔ½á¹ûµÄÏÔÊ¾£»ËùÊöEMV²ÎÊýÅäÖÃ½çÃæÓÃÓÚÊµÏÖ¶Ô½»Ò×²âÊÔ¹ý³ÌÏà¹Ø²ÎÊýµÄÅäÖÃ£»ËùÊöAID²ÎÊýÅäÖÃ½çÃæÓÃÓÚ¼ÓÔØËùÓÐµÄAID²ÎÊý£¬ÊµÏÖÔö¼ÓÐèÒªµÄAID»òÕß¶ÔÒÑ¾­ÏÂÔØÏÂÀ´µÄAID²ÎÊý½øÐÐÐ…	°²È«
Ò»ÖÖÒøÐÐÖ÷»ú½»Ò×¼à¿Ø·ÖÎö·½·¨	ÉÏº£¶¦Ã¯ÐÅÏ¢¼¼ÊõÓÐÏÞ¹«Ë¾	2018-02-07	2019-08-13	CN110119985A	Ö÷·ÖÀàºÅ£ºG06Q40/04(20120101)	ÔÚÉó-¹«¿ª	201501 ÉÏº£ÊÐ½ðÉ½Çø·ããþÉÌ³ÇÜ½ÈØÒ»´å6ºÅÂ¥206ÊÒ	±¾·¢Ã÷Éæ¼°Ò»ÖÖÒøÐÐÖ÷»ú½»Ò×¼à¿Ø·ÖÎö·½·¨£¬·þÎñÆ÷°üÀ¨Ö÷»úºËÐÄ½»Ò×Á¿»ñÈ¡Ä£¿é¡¢Ö÷»ú³ÌÐòÐÔÄÜÊý¾Ý»ñÈ¡Ä£¿é¡¢Ö÷»ú³ÌÐò·ÖÎöÄ£¿é£¬°üÀ¨²½Öè£º¢ÅÉè¶¨ÒøÐÐÖ÷»ú½»Ò×¶Ô±ÈÈÕÆÚ¡¢Ê±¼ä¶Î£»¢Æ¸ù¾ÝÉè¶¨µÄ½»Ò×¶Ô±ÈÈÕÆÚ¡¢Ê±¼ä¶Î£¬Ö÷»úºËÐÄ½»Ò×Á¿»ñÈ¡Ä£¿é²É¼¯ÒøÐÐÖ÷»úµÄºËÐÄ½»Ò×Á¿£»¢Ç¸ù¾ÝÉè¶¨µÄ½»Ò×¶Ô±ÈÈÕÆÚ¡¢Ê±¼ä¶Î£¬Ö÷»ú³ÌÐòÐÔÄÜÊý¾Ý»ñÈ¡Ä£¿é²É¼¯ÒøÐÐÖ÷»úµÄËùÓÐ³ÌÐòµÄÐÔÄÜÊý¾Ý£»¢È¸ù¾Ý»ñÈ¡µÄÒøÐÐÖ÷»úµÄºËÐÄ½»Ò×Á¿¡¢ÒøÐÐÖ÷»úµÄËùÓÐ³ÌÐòµÄÐÔÄÜÊý¾…	Êý¾Ý·ÖÎö
Ò»ÖÖ²âÊÔÊý¾Ý»ýÀÛ·½·¨¼°×°ÖÃ	ÖÐ¹úÒøÐÐ¹É·ÝÓÐÏÞ¹«Ë¾	2018-02-13	2018-07-20	CN108304569A	Ö÷·ÖÀàºÅ£ºG06F17/30(2006.01)I	ÔÚÉó-ÊµÖÊÉó²éµÄÉúÐ§	100818 ±±¾©ÊÐÎ÷³ÇÇø¸´ÐËÃÅÄÚ´ó½Ö1ºÅ	±¾·¢Ã÷Ìá¹©ÁËÒ»ÖÖ²âÊÔÊý¾Ý»ýÀÛ·½·¨¼°×°ÖÃ£¬¸Ã·½·¨°üÀ¨£ºÔÚÏµÍ³²âÊÔ½ø³ÌÎ´¿ªÆôµÄÇé¿öÏÂ£¬´Ó²âÊÔÊý¾Ý³ØÖÐÌáÈ¡²âÊÔÊý¾Ý£¬²¢°´ÕÕÔ¤Éè²âÊÔ¹æÔò¶Ô²âÊÔÊý¾Ý½øÐÐÔ¤´¦Àí£»ÔÚÏµÍ³²âÊÔ½ø³ÌÖ´ÐÐÍê³ÉÔ¤´¦ÀíºóµÄ²âÊÔÊý¾ÝµÄÇé¿öÏÂ£¬´ÓÖ´ÐÐºóµÄ²âÊÔÊý¾ÝÖÐÑ¡È¡¿ÉÄæÊý¾ÝÒÔ¼°ÐÂ²âÊÔÊý¾Ý£»¶Ô¿ÉÄæÊý¾Ý½øÐÐ»Ö¸´²Ù×÷£¬²¢°´ÕÕ»Ö¸´ºóµÄ¿ÉÄæÊý¾ÝºÍÐÂ²âÊÔÊý¾Ý¸üÐÂ²âÊÔÊý¾Ý³Ø¡£»ùÓÚ±¾·¢Ã÷¹«¿ªµÄ·½·¨£¬¿ÉÒÔ±£Ö¤ÒµÎñ²Ù×÷Ê¼ÖÕÄÜ¹»ÔÚ×îÐÂµÄÏµÍ³²âÊÔ»·¾³ÏÂ±»ÕýÈ·Ö´Ð…	Êý¾Ý·ÖÎö
Ò»ÖÖÓÃ»§Êý¾ÝµÄÉú³É·½·¨¡¢×°ÖÃ¡¢·þÎñÆ÷¼°´æ´¢½éÖÊ	ÉîÛÚÇ°º£½Û×ÓÐÅÏ¢¼¼ÊõÓÐÏÞ¹«Ë¾	2018-02-28	2018-08-14	CN108399128A	Ö÷·ÖÀàºÅ£ºG06F11/36(2006.01)I	ÔÚÉó-ÊµÖÊÉó²éµÄÉúÐ§	518000 ¹ã¶«Ê¡ÉîÛÚÊÐÄÏÉ½ÇøÔÁº£½ÖµÀ¿ÆÔ·ÄÏÂ·3099ºÅÖÐ¹ú´¢ÄÜ´óÏÃµÚ23²ã	±¾·¢Ã÷¹«¿ªÁËÒ»ÖÖÓÃ»§Êý¾ÝµÄÉú³É·½·¨¡¢×°ÖÃ¡¢ÖÕ¶ËÉè±¸¼°´æ´¢½éÖÊ¡£ËùÊö·½·¨°üÀ¨£º½ÓÊÕ¿Í»§¶Ë·¢ËÍµÄÊý¾ÝÉú³ÉÇëÇó£»ÆäÖÐ£¬ËùÊöÊý¾ÝÉú³ÉÇëÇóÖÐÐ¯´øÊý¾ÝÉú³É±êÊ¶£»ËùÊöÊý¾ÝÉú³É±êÊ¶ÖÁÉÙ°üÀ¨£º×¢²áÊý¾ÝÉú³É±êÊ¶¡¢°ó¿¨Êý¾ÝÉú³É±êÊ¶¡¢ÏÂµ¥Êý¾ÝÉú³É±êÊ¶¡¢Õ®È¨Êý¾ÝÉú³É±êÊ¶¡¢Æ¥ÅäÊý¾ÝÉú³É±êÊ¶¡¢¼ÆÏ¢Êý¾ÝÉú³É±êÊ¶»òÕß½áËãÊý¾ÝÉú³É±êÊ¶£»ÏìÓ¦ÓÚËùÊöÊý¾ÝÉú³ÉÇëÇóÉú³ÉËùÊöÊý¾ÝÉú³É±êÊ¶¶ÔÓ¦µÄÄ¿±êÓÃ»§Êý¾Ý¡£²»½öÄÜ¹»Ìá¸ßÓÃ»§Êý¾ÝµÄÉú³ÉÐ§ÂÊ£¬¶øÇ…	Êý¾Ý·ÖÎö
Ò»ÖÖ½ðÈÚÏµÍ³Î¢·þÎñ½»Ò×¼à¿ØÊµÏÖ·½·¨	ÉÏº£°¬ÈÚÈí¼þ¹É·ÝÓÐÏÞ¹«Ë¾	2018-03-21	2018-08-10	CN108389131A	Ö÷·ÖÀàºÅ£ºG06Q40/04(2012.01)I	ÔÚÉó-¹«¿ª	202150 ÉÏº£ÊÐ³çÃ÷Çø³ÇÇÅÕò¹ÙÉ½Â·2ºÅ8´±CÇø2076ÊÒ£¨ÉÏº£³çÃ÷¹¤ÒµÔ°Çø£©	Ò»ÖÖ½ðÈÚÏµÍ³Î¢·þÎñ½»Ò×¼à¿ØÊµÏÖ·½·¨£¬²ÉÓÃ´æ´¢ÏµÍ³¡¢ÊµÊ±·ÖÎöÏµÍ³¡¢¼ìË÷ÏµÍ³¡¢·ÖÎöÍÚ¾òÏµÍ³¡¢Ô¤¾¯ÏµÍ³ºÍÉÏÎ»»ú¶Ô½ðÈÚÏµÍ³Î¢·þÎñ½»Ò×½øÐÐ¼à¿Ø£¬´æ´¢ÏµÍ³¡¢ÊµÊ±·ÖÎöÏµÍ³¡¢¼ìË÷ÏµÍ³¡¢·ÖÎöÍÚ¾òÏµÍ³¡¢Ô¤¾¯ÏµÍ³ÊÇ´¦ÀíÆ÷ÄÚ×°µÄÓ¦ÓÃÈí¼þ£¬´æ´¢ÏµÍ³¡¢ÊµÊ±·ÖÎöÏµÍ³ºÍËùÐè¼à¿ØÈô¸ÉÌ¨Ö÷»úÖ®¼äÍ¨¹ýÊý¾ÝÏßÁ¬½Ó£¬Èô¸ÉÌ¨Ö÷»úºÍ´æ´¢ÏµÍ³¡¢ÊµÊ±·ÖÎöÏµÍ³Ö®¼äÍ¨¹ý¹ÜµÀ½øÐÐÐÅÏ¢½»»¥£¬¼ìË÷ÏµÍ³¡¢·ÖÎöÍÚ¾òÏµÍ³Í¨¹ý´æ´¢ÏµÍ³·Ö±ðÊµÏÖÐÅÏ¢¼ìË÷¡¢·ÖÎö£¬Ô¤¾¯Ï…	Êý¾Ý·ÖÎö
Ò»ÖÖ»ùÓÚÒÆ¶¯Éè±¸ÐÐÎªÊý¾ÝµÄ½ðÈÚÆÛÕ©ÐÐÎªÔ¤²â·½·¨	ÉÏº£ë´ÐÅÐÅÏ¢¼¼ÊõÓÐÏÞ¹«Ë¾	2018-03-23	2018-09-07	CN108510280A	Ö÷·ÖÀàºÅ£ºG06Q20/40(2012.01)I	ÔÚÉó-ÊµÖÊÉó²éµÄÉúÐ§	200002 ÉÏº£ÊÐ³¤ÄþÇø°²»¯Â·492ºÅA×ù(1´±)126ÊÒA004	±¾·¢Ã÷¹«¿ªÁËÒ»ÖÖ»ùÓÚÒÆ¶¯Éè±¸ÐÐÎªÊý¾ÝµÄ½ðÈÚÆÛÕ©ÐÐÎªÔ¤²â·½·¨£¬°üÀ¨ÒÔÏÂ²½Öè£º´ÓÄ¿±êÓ¦ÓÃ³ÌÐòµÄÀúÊ·²Ù×÷Êý¾ÝÖÐÉ¸Ñ¡³öÓÃ»§ÐÐÎªÊý¾Ý£»¶ÔÓÃ»§ÐÐÎªÊý¾Ý½øÐÐ¶ÀÈÈ±àÂë²¢Ìí¼ÓÏàÓ¦µÄÊ±¼ä´Á£»»ñÈ¡ÓÃ»§ÐÐÎªÂ·¾¶ÌØÕ÷£»¸ù¾Ý±àÂëÊý¾ÝºÍÓÃ»§ÐÐÎªÂ·¾¶ÌØÕ÷¹¹½¨Ñ­»·Éñ¾­ÍøÂçÄ£ÐÍ£¬»ñÈ¡ÓÃ»§µÄÆÛÕ©·çÏÕ¸ÅÂÊ¡£±¾·¢Ã÷¶ÔÓÃ»§ÔÚÒÆ¶¯Éè±¸ÉÏµÄÐÐÎªÊý¾Ý½øÐÐÍÚ¾òºÍ½¨Ä££¬¿Í¹Û¡¢Á¿»¯µÄÍÚ¾ò³öÓÃ»§µÄÐÐÎªÏ°¹ß£¬²¢¸ø³öÆÛÕ©·çÏÕµÄÔ¤²â¸ÅÂÊ£¬Ê¹µÃ´ËÇ°ÀûÓÃÂÊ½ÏµÍµÄÐ…	Êý¾Ý·ÖÎö
ÒÆ¶¯Ö§¸¶ÍøÂç	¹ã¶«ÈüÌØË¹ÐÅÏ¢¿Æ¼¼ÓÐÏÞ¹«Ë¾	2018-03-23	2019-10-01	CN110298658A	Ö÷·ÖÀàºÅ£ºG06Q20/38(20120101)	ÔÚÉó-¹«¿ª	510630 ¹ã¶«Ê¡¹ãÖÝÊÐÌìºÓÇø½ðËëÂ·3ºÅ»ãÃÀ´óÏÃ	±¾·¢Ã÷Éæ¼°Ò»ÖÖÒÆ¶¯Ö§¸¶ÍøÂç£¬ÆäÖÐÒµÎñÆ½Ì¨ÒÔÒÔÌ«Íø×÷Îª½¨Á¢»ù´¡£¬ÒµÎñÆ½Ì¨Í¨¹ýÍøÂçÓëÊý¾Ý·þÎñÆ÷Á¬½Ó£¬Êý¾Ý·þÎñÆ÷Í¨¹ýÍøÂçÓëÓÃ»§ÖÇÄÜÖÕ¶ËÁ¬½Ó£¬Êý¾Ý·þÎñÆ÷ÓëÉÌ»§ÖÕ¶ËÁ¬½Ó¡£ÕâÖÖÒÆ¶¯Ö§¸¶ÍøÂçÄÜ¹»ÎªÒÆ¶¯Ö§¸¶Ìá¹©¸üÎª¸ßÐ§µÄÖ§¸¶·þÎñ£¬²¢ÇÒ°²È«ÐÔ¸ß£¬¶¨Ê±µÄ½øÐÐÊý¾Ý±¸·Ý£¬±ÜÃâÊý¾ÝÁ÷Ê§£¬·½±ãºóÐøµÄÐÅÏ¢²éÑ¯£¬Âú×ãÊ¹ÓÃÐèÇó¡£	°²È«
Ò»ÖÖ»ùÓÚÔÆ¼ÆËãµÄÊý¾Ý±¸·Ý·½·¨	³É¶¼»ãÖÇÔ¶¾°¿Æ¼¼ÓÐÏÞ¹«Ë¾	2018-03-28	2018-08-28	CN108459929A	Ö÷·ÖÀàºÅ£ºG06F11/14(2006.01)I	ÔÚÉó-ÊµÖÊÉó²éµÄÉúÐ§	610000 ËÄ´¨Ê¡³É¶¼ÊÐ¸ßÐÂÇø¼ªÌ©Â·666ºÅ2´±13²ã2ºÅ	±¾·¢Ã÷Ìá¹©ÁËÒ»ÖÖ»ùÓÚÔÆ¼ÆËãµÄÊý¾Ý±¸·Ý·½·¨£¬¸Ã·½·¨°üÀ¨£º½ÓÊÕÃ¿¸ö½ðÈÚÊý¾Ý´æ´¢·þÎñÆ÷MSµÄ´æ´¢¿Õ¼äÊ£ÓàÁ¿£»µ±´æ´¢·þÎñÆ÷MSÖÐµÄÖÁÉÙÒ»¸ö½ðÈÚÊý¾Ý´æ´¢·þÎñÆ÷MSµÄ´æ´¢¿Õ¼äÊ£ÓàÁ¿´óÓÚ´æ´¢¿Õ¼äÊ¹ÓÃãÐÖµÊ±£¬Æô¶¯Êý¾Ý±¸·Ý½ø³Ì£»È·¶¨±¸·ÝÔªÊý¾Ý£¬ËùÊö±¸·ÝÔªÊý¾Ý°üÀ¨ÐèÒªÊý¾ÝÒÆ³ýµÄ½ðÈÚÊý¾Ý´æ´¢·þÎñÆ÷MSµÄÎ»ÖÃ¡¢´ý±¸·ÝµÄÊÂ¼þÊý¾ÝE_DATAµÄÉ¢ÁÐÖµ¡¢´ý±¸·ÝµÄÊÂ¼þÊý¾ÝE_DATAµÄ´óÐ¡ºÍÄ¿±ê´æ´¢·þÎñÆ÷MSµÄÎ»ÖÃ£»¸ù¾Ý±¸·ÝÔªÊý¾Ý½«´æ´¢µÄ´ý±¸·ÝµÄÊÂ¼…	°²È«
Ò»ÖÖ»ùÓÚÔÆ¼ÆËãµÄÊý¾ÝÐ£Ñé·½·¨	³É¶¼»ãÖÇÔ¶¾°¿Æ¼¼ÓÐÏÞ¹«Ë¾	2018-03-28	2018-09-04	CN108491295A	Ö÷·ÖÀàºÅ£ºG06F11/14(2006.01)I	ÔÚÉó-ÊµÖÊÉó²éµÄÉúÐ§	610000 ËÄ´¨Ê¡³É¶¼ÊÐ¸ßÐÂÇø¼ªÌ©Â·666ºÅ2´±13²ã2ºÅ	±¾·¢Ã÷Ìá¹©ÁËÒ»ÖÖ»ùÓÚÔÆ¼ÆËãµÄÊý¾ÝÐ£Ñé·½·¨£¬¸Ã·½·¨°üÀ¨£ºÔÆÆ½Ì¨µÄÖ§¸¶Ó¦ÓÃ·þÎñÆ÷PAS½ÓÊÕÇ°Ì¨µÄÊÂ¼þÊý¾ÝE_DATA£»Ö§¸¶Ó¦ÓÃ·þÎñÆ÷PASÔÆÆ½Ì¨µÄÓëÐ­µ÷·þÎñÆ÷CSÏàÍ¨ÐÅ£¬½«ÕâÐ©ÊÂ¼þÊý¾ÝE_DATA±£´æÔÚ»º´æ¶ÓÁÐ£¬Ë³ÐòÒÀ´Î·¢ËÍ¸øÐ­µ÷·þÎñÆ÷CS£»Ö§¸¶Ó¦ÓÃ·þÎñÆ÷PASÏòÐ­µ÷·þÎñÆ÷CS·¢ËÍÊý¾Ý¶ÁÇëÇó£¬´ÓÔÆÆ½Ì¨µÄ½ðÈÚÊý¾Ý´æ´¢·þÎñÆ÷MSÖÐ¶ÁÈ¡ÏàÓ¦µÄ½ðÈÚÊÂ¼þÊý¾Ý¡£±¾·¢Ã÷Ìá³öÁËÒ»ÖÖ»ùÓÚÔÆ¼ÆËãµÄÊý¾ÝÐ£Ñé·½·¨£¬Ìá¸ßÁË½ðÈÚÒµÎñÊý¾Ý¹ÜÀíÏµÍ³µÄ°²È«ÐÔºÍ¿É…	°²È«
Ò»ÖÖ»ùÓÚÔÆ¼ÆËãµÄ°²È«´æ´¢·½·¨	³É¶¼»ãÖÇÔ¶¾°¿Æ¼¼ÓÐÏÞ¹«Ë¾	2018-03-28	2018-09-04	CN108494780A	Ö÷·ÖÀàºÅ£ºH04L29/06(2006.01)I	ÔÚÉó-ÊµÖÊÉó²éµÄÉúÐ§	610000 ËÄ´¨Ê¡³É¶¼ÊÐ¸ßÐÂÇø¼ªÌ©Â·666ºÅ2´±13²ã2ºÅ	±¾·¢Ã÷Ìá¹©ÁËÒ»ÖÖ»ùÓÚÔÆ¼ÆËãµÄ°²È«´æ´¢·½·¨£¬¸Ã·½·¨°üÀ¨£ºÔÆÆ½Ì¨µÄÖ§¸¶Ó¦ÓÃ·þÎñÆ÷PASÓë½ðÈÚ½»Ò×ÖÕ¶ËTUEÍ¨¹ý°²È«Í¨ÐÅ·½·¨À´´«Êä½ðÈÚÊÂ¼þÊý¾ÝE_DATA£»Ö§¸¶Ó¦ÓÃ·þÎñÆ÷PAS½«Ç°Ì¨µÄ½ðÈÚÊÂ¼þÊý¾ÝE_DATA´æ´¢ÖÁÔÆÆ½Ì¨µÄ½ðÈÚÊý¾Ý´æ´¢·þÎñÆ÷MSÖÐ¡£±¾·¢Ã÷Ìá³öÁËÒ»ÖÖ»ùÓÚÔÆ¼ÆËãµÄ°²È«´æ´¢·½·¨£¬Ìá¸ßÁË½ðÈÚÒµÎñÊý¾Ý¹ÜÀíÏµÍ³µÄ°²È«ÐÔºÍ¿É¿¿ÐÔ¡£	°²È«
ÒøÐÐ½»»¥½Ó¿ÚÑéÖ¤·½·¨¡¢×°ÖÃ¡¢¼ÆËã»úÉè±¸¼°´æ´¢½éÖÊ	Æ½°²ÆÕ»ÝÆóÒµ¹ÜÀíÓÐÏÞ¹«Ë¾	2018-05-08	2018-10-16	CN108664396A	Ö÷·ÖÀàºÅ£ºG06F11/36(2006.01)I	ÔÚÉó-¹«¿ª	518000 ¹ã¶«Ê¡ÉîÛÚÊÐÇ°º£Éî¸ÛºÏ×÷ÇøÇ°ÍåÒ»Â·1ºÅA¶°201ÊÒ£¨Èë×¤ÉîÛÚÊÐÇ°º£ÉÌÎñÃØÊéÓÐÏÞ¹«Ë¾£©	±¾·¢Ã÷¹«¿ªÁËÒ»ÖÖÒøÐÐ½»»¥½Ó¿ÚÑéÖ¤·½·¨¡¢×°ÖÃ¡¢¼ÆËã»úÉè±¸¼°´æ´¢½éÖÊ£¬·½·¨°üÀ¨£º¸ù¾Ý±ê×¼²âÊÔÓÃÀý£¬¶ÔÒøÐÐ½»»¥½Ó¿Ú½øÐÐ×Ö¶ÎÑéÖ¤£¬½«µÃµ½µÄ×Ö¶ÎÑéÖ¤½á¹ûºÍ×Ö¶ÎÑéÖ¤·µ»ØÐÅÏ¢¼ÇÂ¼ÔÚ×Ö¶ÎÑéÖ¤ÈÕÖ¾ÖÐ£»¸ù¾Ý±ê×¼²âÊÔÓÃÀý£¬¶ÔÒøÐÐ½»»¥½Ó¿Ú½øÐÐÁ÷³ÌÑéÖ¤£¬½«µÃµ½µÄÁ÷³ÌÑéÖ¤½á¹ûºÍÁ÷³ÌÑéÖ¤·µ»ØÐÅÏ¢¼ÇÂ¼ÔÚÁ÷³ÌÑéÖ¤ÈÕÖ¾ÖÐ£»¶Ô×Ö¶ÎÑéÖ¤ÈÕÖ¾ºÍÁ÷³ÌÑéÖ¤ÈÕÖ¾½øÐÐ×Ô¶¯½âÎöÒÔµÃµ½½âÎö½á¹û£¬²¢¸ù¾Ý½âÎö½á¹ûºÍÑéÖ¤½á¹ûµÃµ½ÑéÖ¤±¨¸æ¡£±¾·¢Ã÷ÖÐ²ÉÓÃµÄÒøÐ…	Êý¾Ý·ÖÎö
Ò»ÖÖ»ùÓÚÕæÊµÒµÎñµÄ½ðÈÚ½»Ò×²âÊÔÏµÍ³¼°²âÊÔ·½·¨	É½¶«ÀË³±Í¨ÈíÐÅÏ¢¿Æ¼¼ÓÐÏÞ¹«Ë¾	2018-05-08	2018-10-02	CN108614777A	Ö÷·ÖÀàºÅ£ºG06F11/36(2006.01)I	ÔÚÉó-ÊµÖÊÉó²éµÄÉúÐ§	250100 É½¶«Ê¡¼ÃÄÏÊÐ¸ßÐÂÇøËï´åÕò¿Æº½Â·2877ºÅ	±¾·¢Ã÷¹«¿ªÁËÒ»ÖÖ»ùÓÚÕæÊµÒµÎñµÄ½ðÈÚ½»Ò×²âÊÔÏµÍ³¼°²âÊÔ·½·¨£¬ÊôÓÚ½ðÈÚ½»Ò×µÄÄ£Äâ²âÊÔÁìÓò£¬±¾·¢Ã÷Òª½â¾öµÄ¼¼ÊõÎÊÌâÎªÈçºÎÄÜ¹»ÔÚ²»¶ÔÆóÒµÓÃ»§×Ê½ð°²È«Ôì³ÉÓ°ÏìµÄÇ°ÌáÏÂÊ¹ERP³§ÉÌµÄÏµÍ³ÐÞ¸ÄµÃµ½ÓÐÐ§³ä·ÖµÄÑéÖ¤£¬²ÉÓÃµÄ¼¼Êõ·½°¸Îª£ºÒ»ÖÖ»ùÓÚÕæÊµÒµÎñµÄ½ðÈÚ½»Ò×²âÊÔÏµÍ³£¬¸ÃÏµÍ³°üÀ¨£ºERPÄ£ÄâÆ÷¡¢ÒøÐÐÄ£ÄâÆ÷¡¢ÒøÆóÖ±ÁªÆ½Ì¨¡¢ÑéÖ¤Æ÷¡¢²âÊÔÓÃÀý±à¼­Æ÷¡¢ÒøÐÐÄ£ÄâÅäÖÃÆ÷ºÍ²âÊÔÓÃÀýÔËÐÐ¿ØÖÆÆ÷¡£±¾·¢Ã÷»¹¹«¿ªÁËÒ»ÖÖ»ùÓÚÕæÊµÒµÎñµÄ½ðÈÚ½»Ò×²…	°²È«
Ò»ÖÖ»ùÓÚ¼¨Ð§¿¼ºËÏµÍ³µÄÊý¾Ý´¦Àí·½·¨ºÍÏµÍ³	¹ãÖÝÌìÎ¬ÐÅÏ¢¼¼Êõ¹É·ÝÓÐÏÞ¹«Ë¾	2018-05-11	2018-10-30	CN108717404A	Ö÷·ÖÀàºÅ£ºG06F17/24(2006.01)I	ÔÚÉó-ÊµÖÊÉó²éµÄÉúÐ§	510000 ¹ã¶«Ê¡¹ãÖÝÊÐÌìºÓÇøÈí¼þÂ·11ºÅD¶°µÚ6²ã	±¾·¢Ã÷Éæ¼°Ò»ÖÖ»ùÓÚ¼¨Ð§¿¼ºËÏµÍ³µÄÊý¾Ý´¦Àí·½·¨ºÍÏµÍ³£¬ËùÊö·½·¨°üÀ¨£º½«¼¨Ð§¿¼ºËÏµÍ³ºÍÒøÐÐµÄËùÓÐÒµÎñÏµÍ³µÄÊý¾Ý¶Ô½Ó£»¸ù¾ÝÒøÐÐµÄ¿¼ºËÐèÒª£¬ÀûÓÃ¶Ô½ÓºóµÄÊý¾Ý½øÐÐÒµÎñÍ³¼Æ£»½«¶Ô½ÓºóµÄÊý¾ÝºÍÍ³¼ÆÊý¾Ý½øÐÐ×Ô¶¯±¸·Ý¡£Í¨¹ýÕâÈý´ó¹ý³Ì½«ÒøÐÐ¸÷¸öÒµÎñÏµÍ³µÄÊý¾Ý£¬Í¨¹ý½Ó¿ÚÎÄ¼þ£¬×ª»»µ½¼¨Ð§¿¼ºËÏµÍ³µÄÊý¾Ý¿âÖÐ£¬ÊµÏÖÔÚ³É¼¨Ð§¿¼ºËÏµÍ³ÖÐ¶ÔÒøÐÐ²»Í¬ÒµÎñÏµÍ³µÄÊý¾Ý¼ÆËã¡¢ÒµÎñÍ³¼ÆºÍÊý¾Ý±¸·Ý¹ý³Ì£¬½«ÒøÐÐ²»Í¬ÒµÎñÏµÍ³µÄÊý¾Ý¾ù×ª»»³ÉÓÐÓÃµÄÐ…	Êý¾Ý·ÖÎö
½ðÈÚÒµÎñµÄÓ¦ÓÃÈí¼þÊý¾Ý´¦Àí·½·¨¡¢·þÎñ¶Ë¼°´æ´¢½éÖÊ	Æ½°²ÆÕ»ÝÆóÒµ¹ÜÀíÓÐÏÞ¹«Ë¾	2018-05-18	2018-11-06	CN108763017A	Ö÷·ÖÀàºÅ£ºG06F11/30(2006.01)I	ÔÚÉó-¹«¿ª	518000 ¹ã¶«Ê¡ÉîÛÚÊÐÇ°º£Éî¸ÛºÏ×÷ÇøÇ°ÍåÒ»Â·1ºÅA¶°201ÊÒ£¨Èë×¤ÉîÛÚÊÐÇ°º£ÉÌÎñÃØÊéÓÐÏÞ¹«Ë¾£©	±¾·¢Ã÷¹«¿ªÁËÒ»ÖÖ½ðÈÚÒµÎñµÄÓ¦ÓÃÈí¼þÊý¾Ý´¦Àí·½·¨¡¢·þÎñ¶Ë¼°´æ´¢½éÖÊ£¬¸Ã·½·¨°üÀ¨²½Öè£º»ñÈ¡µÚÒ»Ô¤ÉèÊ±¼ä¶ÎÄÚÓ¦ÓÃÈí¼þÉÏ±¨µÄÓÃ»§Êý¾Ý£»¸ù¾Ý½ðÈÚÒµÎñÁ÷³ÌµÄ½ÚµãÐÅÏ¢ÓëÓ¦ÓÃÈí¼þÉÏ±¨µÄÓÃ»§Êý¾Ý¼äµÄ¶ÔÓ¦¹ØÏµ£¬»ñÈ¡Ó¦ÓÃÈí¼þÉÏ±¨µÄÓÃ»§Êý¾ÝÖÐ·ûºÏÉ¸Ñ¡Ìõ¼þµÄ½ÚµãÐÅÏ¢¶ÔÓ¦µÄÓÃ»§Êý¾Ý£»¸ù¾ÝÓÃ»§Êý¾Ý£¬ÒÀ´Î»ñÈ¡µÚÒ»Ô¤ÉèÊ±¼ä¶ÎÄÚ´Ó½ðÈÚÒµÎñÁ÷³ÌµÄµÚN?1¸ö½Úµã×ª»¯µ½µÚN¸ö½ÚµãµÄµÚÒ»ÓÃ»§Êý¡¢´ÓµÚN¸ö½Úµã½øÈë½ðÈÚÒµÎñÁ÷³ÌËù¶ÔÓ¦µÄµÚ¶þÓÃ»§ÊýÒÔ¼°…	Êý¾Ý·ÖÎö
Ò»ÖÖ½ðÈÚ½»Ò×¹ÊÕÏ¼ì²âÏµÍ³	ºÏ·Ê»ãÓ¢¿Æ¼¼ÓÐÏÞ¹«Ë¾	2018-05-23	2018-11-20	CN108845887A	Ö÷·ÖÀàºÅ£ºG06F9/52(2006.01)I	ÓÐÐ§-ÊµÖÊÉó²éµÄÉúÐ§	230000 °²»ÕÊ¡ºÏ·ÊÊÐËÞÖÝÂ·72ºÅºêÍ¼´óÏÃ17²ã	±¾·¢Ã÷¹«¿ªÁËÒ»ÖÖ½ðÈÚ½»Ò×¹ÊÕÏ¼ì²âÏµÍ³£¬°üÀ¨ÅäÖÃÓÚ½ðÈÚ½»Ò×Éè±¸ÖÐµÄÊÓÆµ¼à¿Øµ¥Ôª£¬ÓëËùÊöÊÓÆµ¼à¿Øµ¥ÔªÏàÁ¬µÄ¿ØÖÆµ¥Ôª£¬ÒÔ¼°ÏÔÊ¾µ¥Ôª¡¢¹ÊÕÏÉÏ±¨µ¥ÔªºÍ¹ÊÕÏ¼ì²â´¦Àíµ¥Ôª£»ËùÊöÊÓÆµ¼à¿Øµ¥Ôª£¬°²×°ÓÐ¶à¸öÉãÏñ»ú£¬ËùÊö¿ØÖÆµ¥Ôª£¬ÓÃÓÚ»ñÈ¡ÊÓÆµ¼à¿Øµ¥ÔªÅÄÉãµÄ»­ÃæÍ¼Ïñ£¬¸ù¾ÝËùÊö»­ÃæÍ¼ÏñÈ·¶¨Éè±¸¹ÊÕÏÎ»ÖÃ¼°Éè±¸¹ÊÕÏÀàÐÍ£¬ÉãÏñ»úµÄÉèÖÃÓÃÓÚ»ñÈ¡½»Ò×Éè±¸ÖÜÎ§ºÍÄÚ²¿»­ÃæÍ¼Ïñ£»Í¨¹ý×°ÖÃÎïÀíÉÏ¸ôÀëµÄ¼àÊÓ½ø³ÌÊµÏÖ¶ÔÓ¦ÓÃºóÌ¨½ø³ÌµÄ¹ÊÕÏ×Ô¶¯¼ì²…	Êý¾Ý·ÖÎö
Ò»ÖÖ½ðÈÚÆ½Ì¨Êý¾Ý¹²Ïí´¦ÀíÏµÍ³	ËÕÖÝ¹¤ÒµÔ°ÇøÖ°Òµ¼¼ÊõÑ§Ôº	2018-05-23	2018-11-06	CN108769178A	Ö÷·ÖÀàºÅ£ºH04L29/08(2006.01)I	ÔÚÉó-¹«¿ª	215000 ½­ËÕÊ¡ËÕÖÝÊÐ¹¤ÒµÔ°Çø¶ÀÊûºþ¸ßµÈ½ÌÓýÇøÈôË®Â·1ºÅ	±¾·¢Ã÷¹«¿ªÁËÒ»ÖÖ½ðÈÚÆ½Ì¨Êý¾Ý¹²Ïí´¦ÀíÏµÍ³£¬°üÀ¨£º½ÓÈëµãÄ£¿é¡¢Êý¾Ý½»»»Ä£¿é¡¢ÔËÐÐ¼à¿ØÄ£¿éºÍÏµÍ³¹ÜÀíÄ£¿é¡£Í¨¹ýÉÏÊö·½Ê½£¬±¾·¢Ã÷½ðÈÚÆ½Ì¨Êý¾Ý¹²Ïí´¦ÀíÏµÍ³£¬Í¨¹ýÉèÖÃ¶à¸ö²»Í¬ÀàÐÍµÄ½ÓÈëµãÓëÊý¾Ý½»»»Ä£¿éÊµÏÖ²»Í¬ÀàÐÍÊý¾ÝµÄ´«Êä£¬¼õÉÙ×ÊÁÏÊÕ¼¯¡¢Êý¾Ý²É¼¯µÈÖØ¸´ÀÍ¶¯£¬¿ÉÒÔ½ÓÊÕÀ´×Ô²»Í¬Í¾¾¶¡¢²»Í¬¸ñÊ½µÄÊý¾Ý£¬¾ßÓÐ¿É¿¿ÐÔÄÜ¸ß¡¢ËÙ¶È¿ì¡¢ÊµÊ±ÐÔÇ¿¡¢³É±¾µÍµÈÓÅµã¡£	Êý¾Ý·ÖÎö
Ò»ÖÖÊý×Ö»õ±ÒË½Ô¿µÄ±¸·Ý·½·¨¡¢×°ÖÃ¼°ÖÕ¶Ë	º£ÄÏÐÂÈíÈí¼þÓÐÏÞ¹«Ë¾	2018-08-14	2019-01-22	CN109255612A	Ö÷·ÖÀàºÅ£ºG06Q20/38(2012.01)I	ÔÚÉó-ÊµÖÊÉó²éµÄÉúÐ§	571924 º£ÄÏÊ¡º£¿ÚÊÐÀÏ³Ç¸ßÐÂ¼¼Êõ²úÒµÊ¾·¶Ô°Çøº£ÄÏÉúÌ¬Èí¼þÎÖ¿Ë¹«Ô°8830¶°	±¾ÉêÇëÊµÊ©Àý¹«¿ªÒ»ÖÖÊý×Ö»õ±ÒË½Ô¿µÄ±¸·Ý·½·¨¡¢×°ÖÃ¼°ÖÕ¶Ë£¬Í¨¹ý½ÓÊÕË½Ô¿Éú³ÉÇëÇó£¬¸ù¾ÝË½Ô¿Éú³ÉÇëÇóÉú³ÉÔ­Ê¼Ë½Ô¿£¬¶ÔÔ­Ê¼Ë½Ô¿½øÐÐ»ìÏý´¦Àí£¬µÃµ½»ìÏýË½Ô¿£¬½«»ìÏýË½Ô¿ÏÔÊ¾ÖÁÏÔÊ¾½çÃæµÄµÚÒ»ÏÔÊ¾ÇøÓò£¬Í¬Ê±ÔÚÏÔÊ¾½çÃæµÄµÚ¶þÏÔÊ¾ÇøÓòÏÔÊ¾»ìÏýÌáÊ¾ÐÅÏ¢£¬½ÓÊÕ¶Ô»ìÏýË½Ô¿µÄ¸´ÖÆÖ¸Áî£¬½«»ìÏýË½Ô¿¸´ÖÆÖÁ¼ôÇÐ°å£¬½ÓÊÕ¶Ô¼ôÇÐ°åµÄÊý¾ÝµÄÕ³ÌùÖ¸Áî£¬½«»ìÏýË½Ô¿Õ³ÌùÖÁ±¸·ÝÇø£»±¾ÉêÇëÔÚÉú³ÉË½Ô¿Ê±¶ÔË½Ô¿µÄÄÚÈÝ½øÐÐ»ìÏý£¬ÔÚÕ¹Ê¾Ë½Ô¿ÒÔÍâµÄÎ»ÖÃ¶Ô»…	°²È«
Ò»ÖÖ½ðÈÚÊý¾ÝÒ»ÖÂÐÔ¼ì²âÏµÍ³¼°·½·¨	¹ã·¢Ö¤È¯¹É·ÝÓÐÏÞ¹«Ë¾	2018-08-30	2019-01-18	CN109240882A	Ö÷·ÖÀàºÅ£ºG06F11/30(2006.01)I	ÔÚÉó-ÊµÖÊÉó²éµÄÉúÐ§	510663 ¹ã¶«Ê¡¹ãÖÝÊÐ»ÆÆÒÇøÖÐÐÂ¹ãÖÝÖªÊ¶³ÇÌÚ·ÉÒ»½Ö2ºÅ618ÊÒ	±¾·¢Ã÷¹«¿ªÒ»ÖÖ½ðÈÚÊý¾ÝÒ»ÖÂÐÔ¼ì²âÏµÍ³¼°·½·¨£¬¸Ã½ðÈÚÊý¾ÝÒ»ÖÂÐÔ¼ì²âÏµÍ³°üÀ¨Êý¾Ý¶ÁÈ¡ÅäÖÃÄ£¿é¡¢Êý¾Ý¶ÁÈ¡Óë±ê×¼»¯Ä£¿é¡¢´ý¼ì²â×Ö¶Î·¢ÏÖÄ£¿é¡¢Êý¾Ý¼ì²â¹æÔòÅäÖÃÄ£¿é¡¢Êý¾ÝÒ»ÖÂÐÔ¼ì²â¹æÔò×ÔÉú³ÉÓë¸üÐÂÄ£¿é¡¢Êý¾ÝÒ»ÖÂÐÔ¼ì²â¹æÔòÈË¹¤ÅäÖÃÄ£¿é¡¢µ÷¶ÈÄ£¿é¡¢¼ì²â¼ÆËãÄ£¿é¡¢ÏûÏ¢ÍÆËÍÄ£¿é¡¢·´À¡Ä£¿é¡£±¾·¢Ã÷Ìá¹©µÄ½ðÈÚÊý¾ÝÒ»ÖÂÐÔ¼ì²âÏµÍ³¼°·½·¨Í¨¹ýËã·¨×Ô¶¯·¢ÏÖÐèÒª½øÐÐÒ»ÖÂÐÔ¼ì²âµÄÊý¾Ý×Ö¶Î£¬Í¨¹ý»úÆ÷×ÔÑ§Ï°Êý¾ÝÒ»ÖÂÐÔ¼ì²â¹æÔò£¬½µµÍÁËÊý¾…	Êý¾Ý·ÖÎö
²úÆ·Êý¾ÝµÄÐ­Í¬±¸·Ý·½·¨¡¢ÏµÍ³¡¢¼ÆËã»úÉè±¸¼°´æ´¢½éÖÊ	Æ½°²¿Æ¼¼£¨ÉîÛÚ£©ÓÐÏÞ¹«Ë¾	2018-08-31	2019-01-25	CN109272410A	Ö÷·ÖÀàºÅ£ºG06Q40/08(2012.01)I	ÔÚÉó-¹«¿ª	518000 ¹ã¶«Ê¡ÉîÛÚÊÐ¸£ÌïÇø¸£Ìï½ÖµÀ¸£°²ÉçÇøÒæÌïÂ·5033ºÅÆ½°²½ðÈÚÖÐÐÄ23Â¥	±¾·¢Ã÷¹«¿ªÁËÒ»ÖÖ²úÆ·Êý¾ÝµÄÐ­Í¬±¸·Ý·½·¨¡¢ÏµÍ³¡¢¼ÆËã»úÉè±¸¼°´æ´¢½éÖÊ£¬ËùÊö·½·¨°üÀ¨£ºÍË±£·þÎñ¶Ë½ÓÊÕ¿Í»§¶Ë·¢ÆðµÄÍË±£ÇëÇó£¬¸ù¾ÝÍË±£ÇëÇóÖÐµÄ±£µ¥±êÊ¶ÐÅÏ¢²éÑ¯±£µ¥Êý¾Ý¿â£¬»ñÈ¡ÍË±£½áËãÐÅÏ¢ºÍÍË±£¼ÇÂ¼Êý¾Ý£»È»ºó½«ÍË±£½áËãÐÅÏ¢ºÍÍË±£¼ÇÂ¼Êý¾Ý·Ö±ð·¢ËÍ¸ø½áËã·þÎñ¶ËºÍ±¸°¸·þÎñ¶Ë£»½áËã·þÎñ¶Ë½ÓÊÕ¿Í»§¶Ë·¢ÆðµÄÓëÍË±£ÇëÇó¶ÔÓ¦µÄ½áËãÇëÇó£¬ÌáÈ¡½áËãÇëÇóÖÐµÄÍË·ÑÏà¹ØÐÅÏ¢²¢¸ù¾ÝÍË±£½áËãÐÅÏ¢¼ÆËãµÃµ½ÍË·Ñ½ð¶î£»È»ºó½«ÍË·ÑÏà¹ØÐÅÏ¢ºÍÍË·…	±£ÏÕ
Ò»ÖÖÊý¾Ý»Ö¸´·½·¨¡¢×°ÖÃ¡¢Êý×ÖÇ®°üÉè±¸¼°¿É¶Á´æ´¢½éÖÊ	±±¾©½ðÉ½°²È«Èí¼þÓÐÏÞ¹«Ë¾	2018-09-28	2019-01-18	CN109240858A	Ö÷·ÖÀàºÅ£ºG06F11/14(2006.01)I	ÔÚÉó-ÊµÖÊÉó²éµÄÉúÐ§	100123 ±±¾©ÊÐ³¯ÑôÇøÒ¦¼ÒÔ°ÄÏÂ·1ºÅ»ÝÍ¨Ê±´ú¹ã³¡8ºÅÂ¥	±¾·¢Ã÷ÊµÊ©ÀýÌá¹©ÁËÒ»ÖÖÊý¾Ý»Ö¸´·½·¨¡¢×°ÖÃ¡¢Êý×ÖÇ®°üÉè±¸¼°¿É¶Á´æ´¢½éÖÊ¡£¸Ã·½·¨°üÀ¨£ºµ±½ÓÊÕµ½Êý¾Ý»Ö¸´Ö¸ÁîÊ±£¬È·¶¨ÓëÊý×ÖÇ®°üÉè±¸½¨Á¢ÓÐÍ¨ÐÅÁ¬½ÓµÄµÚÒ»´æ´¢Éè±¸µÄµÚÒ»±êÊ¶£¬È·¶¨ÓëµÚÒ»´æ´¢Éè±¸²å°ÎµçÁ¬½ÓµÄµÚ¶þ´æ´¢Éè±¸µÄµÚ¶þ±êÊ¶£»»ùÓÚµÚÒ»±êÊ¶ºÍµÚ¶þ±êÊ¶£¬È·¶¨´ý»Ö¸´Êý¾ÝµÄÄ¿±êÉè±¸£»ÀûÓÃ·ÇÄ¿±êÉè±¸Ëù´æ´¢µÄ×ÓÊý¾Ý»Ö¸´Ä¿±êÉè±¸ËùÐè´æ´¢µÄ×ÓÊý¾Ý£»ÔÚ¶ÔÄ¿±êÉè±¸ËùÐè´æ´¢µÄ×ÓÊý¾Ý½øÐÐ»Ö¸´Ö®ºó£¬Ã¿¸ö·ÇÄ¿±êÉè±¸ºÍÄ¿±êÉè±¸ÖÐ´æ´¢Ó…	°²È«
ÊÊÓÃÓÚÒÆ¶¯Ö§¸¶Éè±¸µÄ¿ª»ú×Ô¼ì·½·¨ºÍ×°ÖÃ	±±¾©ÒâÈñÐÂ´´¿Æ¼¼ÓÐÏÞ¹«Ë¾	2018-10-10	2020-04-17	CN111026587A	Ö÷·ÖÀàºÅ£ºG06F11/22(20060101)	ÔÚÉó-¹«¿ª	100085 ±±¾©ÊÐº£µíÇøÉÏµØÎ÷Â·6ºÅÔº1´±D5(ÁªÏë±±ÑÐ´óÏÃ)	±¾¹«¿ªÌá¹©ÁËÒ»ÖÖÊÊÓÃÓÚÒÆ¶¯Ö§¸¶Éè±¸µÄ¿ª»ú×Ô¼ì·½·¨£¬¶Ô²¼ÉèÔÚ¶à¸ö³¡¾°µÄÒÆ¶¯Ö§¸¶Éè±¸×éÍø£¬¶ÔÒÆ¶¯Ö§¸¶Éè±¸¡¢¿ØÖÆÒÆ¶¯Ö§¸¶Éè±¸µÄÉÏÎ»»úÒÔ¼°·þÎñÆ÷¼¯ÈºÈýÕß½øÐÐÁ¬½Ó£»ÊµÊ±»ñÈ¡·þÎñÆ÷¼¯Èº·¢ËÍµÄÊÊÓÃÓÚÒÆ¶¯Ö§¸¶Éè±¸¿ª»ú×Ô¼ìµÄ¶à¸ö²ÎÊýµÄÊý¾Ý£¬²¢¸ù¾Ý¶à¸ö²ÎÊýµÄÊý¾ÝÍê³ÉÊÊÓÃÓÚÒÆ¶¯Ö§¸¶Éè±¸µÄ¿ª»ú×Ô¼ì²Ù×÷¡£¸Ã·½·¨¶ÔÒÆ¶¯Ö§¸¶Éè±¸×éÍø£¬Õë¶Ô·ÖÉ¢µÄÒÆ¶¯Ö§¸¶Éè±¸Í¨¹ýÔÆ·þÎñÆ÷¼¯ÈºÍ³Ò»ÔÚÔ¤ÉèÊ±¼ä¶ÎÄÚ¿ª»ú×Ô¼ì£¬Íê³ÉÁËÎÞÐèÈË¹¤²ÎÓëµÄÊÊÓÃÓÚÒ…	Ö§¸¶
Ò»ÖÖ½ðÈÚ²úÆ·¹ÀÖµÓë»á¼ÆºËËãÏµÍ³¸ß·ÂÕæ²âÊÔ·½·¨	»ªÌ©Ö¤È¯¹É·ÝÓÐÏÞ¹«Ë¾	2018-10-15	2019-01-08	CN109165166A	Ö÷·ÖÀàºÅ£ºG06F11/36(2006.01)I	ÔÚÉó-ÊµÖÊÉó²éµÄÉúÐ§	210000 ½­ËÕÊ¡ÄÏ¾©ÊÐ½­¶«ÖÐÂ·228ºÅ	±¾·¢Ã÷Ìá¹©Ò»ÖÖ½ðÈÚ²úÆ·¹ÀÖµÓë»á¼ÆºËËãÏµÍ³¸ß·ÂÕæ²âÊÔ·½·¨£¬°üÀ¨ÒÔÏÂ²½Öè£º²âÊÔÊý¾Ý×¼±¸,»ùÏß°æ±¾¹ÀÖµÖ´ÐÐ£¬´ý²â°æ±¾¹ÀÖµÖ´ÐÐ£¬Ö´ÐÐ½á¹û¶Ô±È¼°²îÒì¶¨Î»¡£±¾·¢Ã÷½â¾öÏÖÓÐ¹ÀÖµÏµÍ³²âÊÔ¶ÔÓÚ¹ÀÖµ¡¢»á¼ÆÒµÎñÖªÊ¶ÒÀÀµÑÏÖØ£¬ÒµÎñ¸²¸ÇÂÊ²»×ã¼°²âÊÔÖ´ÐÐÐ§ÂÊ½ÏµÍµÄÏÖ×´£¬Ê¹¹ÀÖµÏµÍ³¾ßÓÐÒ»ÖÖ¸ßÐ§¡¢ÕæÊµ¡¢¿É¿¿µÄ»Ø¹é²âÊÔ·½Ê½£¬ÓÐÐ§·¢ÏÖÏµÍ³È±ÏÝ£¬±£ÕÏ¹ÀÖµÒµÎñÁ¬ÐøÐÔ¡£	Êý¾Ý·ÖÎö
ÐÅ´ûÆ½Ì¨²âÊÔ·½·¨¡¢×°ÖÃ¡¢ÖÕ¶ËÉè±¸¼°¿É¶Á´æ´¢½éÖÊ	ÉîÛÚÊÐ°ÛÇª½ðÈÚ·þÎñÓÐÏÞ¹«Ë¾	2018-11-14	2019-04-05	CN109582569A	Ö÷·ÖÀàºÅ£ºG06F11/36(2006.01)I	ÔÚÉó-¹«¿ª	518000 ¹ã¶«Ê¡ÉîÛÚÊÐ¸£ÌïÇø²ÊÌïÂ·7018ºÅÐÂºÆÒ¼¶¼C×ùÈ¹Â¥3F	±¾·¢Ã÷ÊÊÓÃÓÚÈí¼þ²âÊÔ¼¼ÊõÁìÓò£¬Ìá¹©ÁËÒ»ÖÖÐÅ´ûÆ½Ì¨²âÊÔ·½·¨¡¢×°ÖÃ¡¢ÖÕ¶ËÉè±¸¼°¿É¶Á´æ´¢½éÖÊ£¬ÐÅ´ûÆ½Ì¨²âÊÔ·½·¨°üÀ¨½ÓÊÕÀ´×ÔÐÅ´ûÓ¦ÓÃ¶ÔÓ¦µÄÉè±¸µÄ²âÊÔÇëÇó£¬¸ù¾Ý½Ó¿ÚµØÖ·ÐÅÏ¢È·¶¨ÔÚ×Ê·½µÄÄ£Äâ²âÊÔ»·¾³ÖÐÓë²âÊÔÇëÇó¶ÔÓ¦µÄÄ¿±ê×Ê·½£¬²¢Í¨¹ýÄ¿±ê×Ê·½¶ÔÓ¦µÄÔ¤ÉèÑéÖ¤ÐÅÏ¢¶ÔÑéÖ¤ÐÅÏ¢½øÐÐÑéÖ¤£¬ÈôÑéÖ¤Í¨¹ý£¬ÔòÔÚÄ¿±ê×Ê·½µÄÄ£Äâ²âÊÔ»·¾³ÖÐ¸ù¾Ý²âÊÔÐèÇóÐÅÏ¢½øÐÐ²âÊÔ£¬²¢½«´¦Àí½á¹û·¢ËÍ¸øÉè±¸¡£±¾¼¼Êõ·½°¸ÖÐ£¬½¨Á¢Óë×Ê·½¶ÔÓ¦µÄÄ£Äâ²âÊÔ»·¾³£…	½è´û
Ò»ÖÖÒøÐÐ´óÐÍ²âÊÔ»·¾³¹ÜÀí·½·¨¼°ÏµÍ³	¸£½¨Ê¡Å©´åÐÅÓÃÉçÁªºÏÉç	2018-11-27	2019-04-16	CN109634848A	Ö÷·ÖÀàºÅ£ºG06F11/36(2006.01)I	ÔÚÉó-¹«¿ª	350000 ¸£½¨Ê¡¸£ÖÝÊÐ¹ÄÂ¥ÇøÎåËÄ±±Â·317ºÅ	±¾·¢Ã÷Ìá¹©ÁËÒ»ÖÖÒøÐÐ´óÐÍ²âÊÔ»·¾³¹ÜÀí·½·¨£¬°üÀ¨ÈçÏÂ²½Öè£º²½ÖèS10¡¢ÔÚ¶ÀÁ¢ÓÚ¸÷¿Í»§¶ËµÄ¼à¿ØÉè±¸ÉÏ°²×°¼à¿Ø½Å±¾£¬ÀûÓÃ¼à¿Ø½Å±¾¶Ô²âÊÔ»·¾³½øÐÐ¼à¿Ø²¢»ñÈ¡¼à¿ØÐÅÏ¢£»²½ÖèS20¡¢¼à¿ØÉè±¸½«¼à¿ØÐÅÏ¢·¢ËÍÖÁ·þÎñ¶Ë£»²½ÖèS30¡¢·þÎñ¶Ë»ñÈ¡¸÷¿Í»§¶Ë¼äµÄÁ¬½Ó¹ØÏµ£¬²¢ÒÀ¾Ý¿Í»§¶Ë¼äµÄÁ¬½Ó¹ØÏµ»æÖÆ¿Í»§¶ËÖ®¼äµÄÍØÆËÍ¼²¢Õ¹Ê¾³öÀ´£»²½ÖèS40¡¢·þÎñ¶Ë»ñÈ¡ÏîÄ¿ÐÅÏ¢£¬²¢ÒÀ¾ÝÏîÄ¿ÐÅÏ¢»æÖÆÏîÄ¿Óë¿Í»§¶ËÖ®¼äµÄÍØÆËÍ¼²¢Õ¹Ê¾³öÀ´£»±¾·¢Ã÷»¹Ìá¹©ÁËÒ»ÖÖÒøÐÐ´…	°²È«
±£ÏÕ²úÆ·µÄ²âÊÔ·½·¨¼°×°ÖÃ¡¢´æ´¢½éÖÊ¼°µç×ÓÉè±¸	Ì©¿µ±£ÏÕ¼¯ÍÅ¹É·ÝÓÐÏÞ¹«Ë¾	2018-12-04	2019-02-22	CN109376093A	Ö÷·ÖÀàºÅ£ºG06F11/36(2006.01)I	ÔÚÉó-¹«¿ª	100031 ±±¾©ÊÐÎ÷³ÇÇø¸´ÐËÃÅÄÚ´ó½Ö156ºÅÌ©¿µÈËÊÙ´óÏÃ	±¾·¢Ã÷Ìá¹©ÁËÒ»ÖÖ±£ÏÕ²úÆ·µÄ²âÊÔ·½·¨£¬°üÀ¨£º»ñÈ¡µ±Ç°´ý²âÊÔ±£ÏÕ²úÆ·¶ÔÓ¦µÄ²âÊÔÐèÇóÎÄµµ£¬²¢¶ÁÈ¡ËùÊö²âÊÔÐèÇóÎÄµµÖÐ°üº¬µÄ±£ÏÕ²úÆ·ÐÅÏ¢£»ÒÀ¾ÝËùÊö±£ÏÕ²úÆ·ÐÅÏ¢£¬Éú³É²âÊÔÊý¾Ý±í£»ÔÚËùÊö²âÊÔÊý¾Ý±íÖÐ£¬Ñ¡È¡ËùÊö´ý²âÊÔ±£ÏÕ²úÆ·µÄ¶à¸öÊôÐÔÏî£¬²¢ÒÀ¾ÝÔ¤ÉèµÄÅäÖÃ¹æÔò£¬ÎªÃ¿¸öËùÊöÊôÐÔÏîÅäÖÃÊôÐÔÖµ£»½«ÒÑÅäÖÃÊôÐÔÖµµÄ¸÷¸öÊôÐÔÏî½øÐÐ×éºÏ£¬Éú³ÉËùÊö´ý²âÊÔ²úÆ·¶ÔÓ¦µÄ¶à¸ö²âÊÔÓÃÀý¡£±¾·¢Ã÷Ìá¹©µÄ±£ÏÕ²úÆ·µÄ²âÊÔ·½·¨£¬ÄÜ¹»»ùÓÚÐèÇóÎÄµµ×Ô¶¯É…	±£ÏÕ
¹«¹²½»Í¨×Ô¶¯ÊÛ¼ìÆ±ÏµÍ³ÒÆ¶¯Ö§¸¶µÄ¶þÎ¬Âë	ÄÏ¾©ÐÜÃ¨µç×Ó¹É·ÝÓÐÏÞ¹«Ë¾	2018-12-17	2019-05-17	CN109766973A	Ö÷·ÖÀàºÅ£ºG06K19/06(2006.01)I	ÔÚÉó-¹«¿ª	210002 ½­ËÕÊ¡ÄÏ¾©ÊÐÇØ»´ÇøÖÐÉ½¶«Â·301ºÅ	±¾·¢Ã÷¹«¿ªÁËÒ»ÖÖ¹«¹²½»Í¨×Ô¶¯ÊÛ¼ìÆ±ÏµÍ³ÒÆ¶¯Ö§¸¶µÄ¶þÎ¬Âë£¬°üÀ¨ÈçÏÂ²½Öè£ºÔÚ×Ô¶¯ÊÛ¼ìÆ±ÏµÍ³µÄÒÆ¶¯Ö§¸¶ÏµÍ³ÖÐ¶þÎ¬ÂëÎª»ìºÏÊ½¶þÎ¬Âë£»ÔÚ×Ô¶¯ÊÛ¼ìÆ±ÏµÍ³µÄÒÆ¶¯Ö§¸¶ÏµÍ³ÖÐ¶þÎ¬Âë¾ßÓÐÂëÍ·ºÍÂëÎ²Éè¼Æ£»ÔÚ×Ô¶¯ÊÛ¼ìÆ±ÏµÍ³µÄÒÆ¶¯Ö§¸¶ÏµÍ³ÖÐ¶þÎ¬Âë¾ßÓÐÇø·ÖÐÐÒµÊý¾ÝºÍÓÃ»§Êý¾ÝÉè¼Æ£»ÔÚ×Ô¶¯ÊÛ¼ìÆ±ÏµÍ³µÄÒÆ¶¯Ö§¸¶ÏµÍ³ÖÐ¶þÎ¬Âë¾ßÓÐÐÐÒµÊý¾ÝÇ©ÃûºÍÓÃ»§Êý¾ÝÇ©Ãû¼°½»²æÑéÖ¤µÄÉè¼Æ£»ÔÚ×Ô¶¯ÊÛ¼ìÆ±ÏµÍ³µÄÒÆ¶¯Ö§¸¶ÏµÍ³ÖÐ¶þÎ¬Âë¾ßÓÐÓÃÓÚºÍ±ê×¼Ä£°å±È½Ïµ…	Ö§¸¶
½ðÈÚÊý¾Ý·ÖÎöÏµÍ³×Ô¶¯»¯²âÊÔ½á¹ûµÄ´¦Àí·½·¨¼°×°ÖÃ	Æ½°²¿Æ¼¼£¨ÉîÛÚ£©ÓÐÏÞ¹«Ë¾	2018-12-19	2019-04-16	CN109634868A	Ö÷·ÖÀàºÅ£ºG06F11/36(2006.01)I	ÔÚÉó-¹«¿ª	518000 ¹ã¶«Ê¡ÉîÛÚÊÐ¸£ÌïÇø¸£Ìï½ÖµÀ¸£°²ÉçÇøÒæÌïÂ·5033ºÅÆ½°²½ðÈÚÖÐÐÄ23Â¥	±¾·¢Ã÷Éæ¼°Êý¾Ý´¦Àí¼¼ÊõÁìÓò£¬Ìá¹©ÁËÒ»ÖÖ½ðÈÚÊý¾Ý·ÖÎöÏµÍ³×Ô¶¯»¯²âÊÔ½á¹ûµÄ´¦Àí·½·¨¡¢×°ÖÃ¡¢´æ´¢½éÖÊ¼°µç×ÓÉè±¸£¬¸Ã·½·¨°üÀ¨£º»ñÈ¡½ðÈÚÊý¾Ý·ÖÎöÏµÍ³µÄ¹¹½¨´úÂëÎ´·¢Éú±ä¶¯Ö®Ç°µÄ²âÊÔÖ¸±êÖµ£¬²¢½«²âÊÔÖ¸±êÖµ´æ´¢ÔÚ»º³åÇø£»»ñÈ¡Í¨¹ý½ðÈÚÊý¾Ý·ÖÎöÏµÍ³µÃµ½µÄÒµÎñÊý¾Ý´¦Àí½á¹û£»ÏìÓ¦ÓÚÔÚ½ðÈÚÊý¾Ý·ÖÎöÏµÍ³µÄ¹¹½¨´úÂë·¢Éú±ä¶¯ºóÓÃ»§µÄ²âÊÔÇëÇó£¬¶Ô½ðÈÚÊý¾Ý·ÖÎöÏµÍ³½øÐÐ×Ô¶¯»¯²âÊÔ£¬µÃµ½×Ô¶¯»¯²âÊÔ½á¹û£¬²¢½«×Ô¶¯»¯²âÊÔ½á¹û´æ´¢ÔÚËùÊö»º³åÇ…	Êý¾Ý·ÖÎö
Ö§¸¶µ÷ÓÃ¹ý³ÌÐ£Ñé·½·¨¡¢ÏµÍ³¡¢Éè±¸ÒÔ¼°½éÖÊ	½­ËÕÂúÔËÈí¼þ¿Æ¼¼ÓÐÏÞ¹«Ë¾	2018-12-28	2019-05-03	CN109710446A	Ö÷·ÖÀàºÅ£ºG06F11/07(2006.01)I	ÔÚÉó-¹«¿ª	210012 ½­ËÕÊ¡ÄÏ¾©ÊÐÓê»¨Ì¨ÇøÈí¼þ´óµÀ170-1ºÅ4´±3-5²ã	±¾·¢Ã÷¹«¿ªÁËÒ»ÖÖÖ§¸¶µ÷ÓÃ¹ý³ÌÐ£Ñé·½·¨¡¢ÏµÍ³¡¢Éè±¸ÒÔ¼°½éÖÊ£¬¸Ã·½·¨°üÀ¨£º»ñÈ¡Î»ÓÚ½Ó¿Ú²ãÖÐµÄÖ§¸¶½ÚµãµÄµ÷ÓÃÐÅÏ¢£¬ËùÊöµ÷ÓÃÐÅÏ¢°üÀ¨µ÷ÓÃËùÊö·þÎñ²ãÖÐµÄËùÊö·þÎñ½ÚµãµÄµÚÒ»µ÷ÓÃÐÅÏ¢£¬µ÷ÓÃËùÊöÁìÓò²ãÖÐµÄËùÊöÐÐÎª½ÚµãµÄµÚ¶þµ÷ÓÃÐÅÏ¢£¬ÒÔ¼°µ÷ÓÃËùÊöÊý¾Ý²ãÖÐµÄËùÊöÊý¾Ý½ÚµãµÄµÚÈýµ÷ÓÃÐÅÏ¢£»¸ù¾ÝËùÊöµÚÒ»µ÷ÓÃÐÅÏ¢¡¢ËùÊöµÚ¶þµ÷ÓÃÐÅÏ¢ÒÔ¼°µÚÈýµ÷ÐÅÏ¢³ÉÒ»µ÷ÓÃÍØÆËÍ¼£¬ËùÊöµ÷ÓÃÍØÆËÍ¼ÖÐÍ¨¹ýÁ¬½ÓÂ·¾¶½«µ÷ÓÃ½ÚµãºÍ±»µ÷ÓÃ½ÚµãÏàÁ¬£»¸ù¾ÝÒ»¼ì²…	Ö§¸¶
»ùÓÚ»úÆ÷Ñ§Ï°µÄÏµÍ³Éý¼¶Ê§°ÜµÄÕï¶Ï·½·¨¼°×°ÖÃ	Æ½°²¿Æ¼¼£¨ÉîÛÚ£©ÓÐÏÞ¹«Ë¾	2019-01-03	2019-06-11	CN109871315A	Ö÷·ÖÀàºÅ£ºG06F11/36(2006.01)I	ÔÚÉó-¹«¿ª	518000 ¹ã¶«Ê¡ÉîÛÚÊÐ¸£ÌïÇø¸£Ìï½ÖµÀ¸£°²ÉçÇøÒæÌïÂ·5033ºÅÆ½°²½ðÈÚÖÐÐÄ23Â¥	±¾·¢Ã÷½ÒÊ¾ÁËÒ»ÖÖ»ùÓÚ»úÆ÷Ñ§Ï°µÄÏµÍ³Éý¼¶Ê§°ÜµÄÕï¶Ï·½·¨¡¢×°ÖÃ¡¢¼ÆËã»úÉè±¸¼°´æ´¢½éÖÊ£¬ÊôÓÚ¼ÆËã»ú¼¼ÊõÁìÓò£¬ÆäÖÐ·½·¨°üÀ¨£º»ñÈ¡¶Ô½ðÈÚÊý¾Ý·ÖÎöÏµÍ³²âÊÔµÃµ½µÄ²âÊÔÖ¸±êÖµ£¬ÆäÖÐ£¬ËùÊö²âÊÔÖ¸±êÖµÎª½ðÈÚÊý¾Ý·ÖÎöÏµÍ³ÔÚ±»²âÊÔÎªÉý¼¶Ê§°ÜÊ±£¬¶Ô²âÊÔÊ±ÏòËùÊö½ðÈÚÊý¾Ý·ÖÎöÏµÍ³ÊäÈë½ðÈÚ²úÆ·µÄÔËÐÐÊý¾ÝºóËùÊö½ðÈÚÊý¾Ý·ÖÎöÏµÍ³Õë¶Ô²âÊÔÖ¸±êµÃµ½µÄÊýÖµ£»½«ËùÊö²âÊÔÖ¸±êÖµÊäÈëÖÁÔ¤ÉèµÄµÚÒ»»úÆ÷Ñ§Ï°Ä£ÐÍ½øÐÐ´¦ÀíµÃµ½Éý¼¶Ê§°ÜÀàÐÍ±êÇ©¡£±¾·¢Ã÷Ì…	Êý¾Ý·ÖÎö
ÖÇÄÜÖÕ¶Ë½ðÈÚÍâÉè°²È«¼à¿Ø·½·¨¡¢×°ÖÃ¡¢·þÎñÆ÷¼°ÏµÍ³	ÖÐ¹ú¹¤ÉÌÒøÐÐ¹É·ÝÓÐÏÞ¹«Ë¾	2019-01-07	2019-05-21	CN109783318A	Ö÷·ÖÀàºÅ£ºG06F11/30(2006.01)I	ÔÚÉó-¹«¿ª	100140 ±±¾©ÊÐÎ÷³ÇÇø¸´ÐËÃÅÄÚ´ó½Ö55ºÅ	±¾·¢Ã÷Ìá¹©ÁËÒ»ÖÖÖÇÄÜÖÕ¶Ë½ðÈÚÍâÉè°²È«¼à¿Ø·½·¨¡¢×°ÖÃ¡¢·þÎñÆ÷¼°ÏµÍ³£¬¸Ã·½·¨°üÀ¨£º½ÓÊÕÉÌ»§APP·¢ÆðµÄ°üº¬APPÏà¹ØÐÅÏ¢ºÍ¹¦ÄÜÃû³ÆµÄ½ðÈÚÍâÉèµ÷ÓÃÇëÇó£»¸ù¾ÝËùÊöAPPÏà¹ØÐÅÏ¢È·ÈÏËùÊöÉÌ»§APPµÄ·ÃÎÊÈ¨ÏÞ£¬Èç¹û·ÃÎÊÈ¨ÏÞ±êÊ¶ÎªÔÊÐíÔòÔÊÐíÇëÇó·¢ÆðÕßµ÷ÓÃ½ðÈÚÍâÉè£»¼ÇÂ¼ËùÊö½ðÈÚÍâÉèµ÷ÓÃÇëÇó¼°½ðÈÚÍâÉèµÄÏìÓ¦½á¹û²¢ÐÎ³É¼à¿ØÈÕÖ¾£¬½«ËùÊö¼à¿ØÈÕÖ¾ÉÏ±¨ÖÕ¶ËÐÐÎª¼à¿Ø·þÎñÆ÷£¬ÒÔÅÐ¶ÏËùÊöÉÌ»§APPµ÷ÓÃ½ðÈÚÍâÉèµÄÐÐÎªÊÇ·ñÒì³£¡£±¾·¢Ã÷Í¨¹ýÔÚÉÌ»§AP…	°²È«
Ò»ÖÖ»¥ÁªÍøÒÆ¶¯½ðÈÚÖ§¸¶ÖÕ¶Ë	ÖØÇì¹¤³ÌÖ°Òµ¼¼ÊõÑ§Ôº	2019-01-15	2019-05-14	CN109754239A	Ö÷·ÖÀàºÅ£ºG06Q20/32(2012.01)I	ÔÚÉó-¹«¿ª	402260 ÖØÇìÊÐ½­½òÇø±õ½­ÐÂ³ÇÄÏ±±´óµÀ1ºÅ	±¾·¢Ã÷Éæ¼°Ö§¸¶Éè±¸ÁìÓò£¬¾ßÌåÉæ¼°Ò»ÖÖ»¥ÁªÍøÒÆ¶¯½ðÈÚÖ§¸¶ÖÕ¶Ë£¬°üÀ¨¹Ì¶¨¿ÇÌåºÍ¸ÇºÏ¿ÇÌå£¬ËùÊö¹Ì¶¨¿ÇÌå¹Ì¶¨ÔÚ½ðÈÚÉè±¸ÉÏ£¬ËùÊö¸ÇºÏ¿ÇÌå¿É²ðÐ¶¹Ì¶¨ÔÚ¹Ì¶¨¿ÇÌåÉÏ£¬ËùÊö¸ÇºÏ¿ÇÌåÉÏ¿ªÉèÓÐÓÃÓÚ·ÅÖÃÏÖ½ðµÄ·ÅÖÃ¿ª¿Ú£¬ËùÊö·ÅÖÃ¿ª¿Ú±ßÔµ½Â½ÓÓÐÓÃÓÚ¸²¸Ç·ÅÖÃ¿ª¿ÚµÄ¸Ç°å£¬ËùÊö¸Ç°åºÍ¸ÇºÏ¿ÇÌåÖ®¼äÉèÖÃÓÐÓÃÓÚ¹Ì¶¨¸Ç°åºÍ¸ÇºÏ¿ÇÌåÖ®¼äÏà¶ÔÎ»ÖÃµÄ¹Ì¶¨¼þ£¬ËùÊö¹Ì¶¨¼þÉÏÉèÖÃÓÐÓÃÓÚ¿ØÖÆ¹Ì¶¨¼þ×Ô¶¯¿ªÆôºÍ¹Ø±ÕµÄ¿ØÖÆ»ØÂ·£¬ËùÊö¿ØÖÆ»ØÂ·°üÀ¨¿ØÖÆ¿ª¹ØºÍ²åÈ…	Ö§¸¶
½ðÈÚÊý¾Ý·ÖÎöÏµÍ³µÄ²âÊÔ·½·¨¡¢×°ÖÃ¡¢½éÖÊ¡¢µç×ÓÉè±¸	Æ½°²¿Æ¼¼£¨ÉîÛÚ£©ÓÐÏÞ¹«Ë¾	2019-01-23	2019-06-11	CN109872230A	Ö÷·ÖÀàºÅ£ºG06Q40/00(2012.01)I	ÔÚÉó-¹«¿ª	518000 ¹ã¶«Ê¡ÉîÛÚÊÐ¸£ÌïÇø¸£Ìï½ÖµÀ¸£°²ÉçÇøÒæÌïÂ·5033ºÅÆ½°²½ðÈÚÖÐÐÄ23Â¥	±¾·¢Ã÷Éæ¼°ÔÆ²âÊÔ¼¼ÊõÁìÓò£¬½ÒÊ¾ÁËÒ»ÖÖ½ðÈÚÊý¾Ý·ÖÎöÏµÍ³µÄ²âÊÔ·½·¨¡¢×°ÖÃ¡¢½éÖÊ¼°µç×ÓÉè±¸¡£¸Ã·½·¨°üÀ¨£º»ñÈ¡Ä¿±ê²âÊÔÏî£»´ÓÎÄ¼þ±¸·Ý¿Õ¼äÖÐ»ñÈ¡ÓëËùÊöÄ¿±ê²âÊÔÏîÆ¥ÅäµÄÊý¾ÝÎÄ¼þÒÔ¼°ÓëËùÊöÊý¾ÝÎÄ¼þ¶ÔÓ¦µÄµÚÒ»·ÖÎö½á¹ûÎÄ¼þ£»½«ËùÊöÊý¾ÝÎÄ¼þÊäÈë½ðÈÚÊý¾Ý·ÖÎöÏµÍ³£¬ÒÔ±ãËùÊö½ðÈÚÊý¾Ý·ÖÎöÏµÍ³Êä³öÓëËùÊöÊý¾ÝÎÄ¼þ¶ÔÓ¦µÄµÚ¶þ·ÖÎö½á¹ûÎÄ¼þ£»»ñÈ¡ËùÊöµÚ¶þ·ÖÎö½á¹ûÎÄ¼þ£¬²¢ÓëËùÊöµÚÒ»·ÖÎö½á¹ûÎÄ¼þ½øÐÐ±È¶ÔÒÔµÃ³ö±È¶Ô½á¹û£»¸ù¾ÝËùÊö±È¶Ô½á¹û×…	Êý¾Ý·ÖÎö
½ðÈÚÏµÍ³Éý¼¶·½·¨¼°×°ÖÃ¡¢µç×ÓÉè±¸¡¢´æ´¢½éÖÊ	Æ½°²¿Æ¼¼£¨ÉîÛÚ£©ÓÐÏÞ¹«Ë¾	2019-01-29	2019-06-18	CN109901997A	Ö÷·ÖÀàºÅ£ºG06F11/36(2006.01)I	ÔÚÉó-¹«¿ª	518000 ¹ã¶«Ê¡ÉîÛÚÊÐ¸£ÌïÇø¸£Ìï½ÖµÀ¸£°²ÉçÇøÒæÌïÂ·5033ºÅÆ½°²½ðÈÚÖÐÐÄ23Â¥	±¾¹«¿ªÌá¹©ÁËÒ»ÖÖ½ðÈÚÏµÍ³Éý¼¶·½·¨¡¢½ðÈÚÏµÍ³Éý¼¶×°ÖÃ¡¢µç×ÓÉè±¸¼°¼ÆËã»ú¿É¶Á´æ´¢½éÖÊ£¬ÊôÓÚ¼ÆËã»ú¼¼ÊõÁìÓò¡£¸Ã·½·¨°üÀ¨£º»ñÈ¡³õÊ¼½ðÈÚÏµÍ³£¬²¢»ñÈ¡Õë¶ÔÓÚËùÊö³õÊ¼½ðÈÚÏµÍ³µÄ¶à¸öÐÞ¸Ä½Úµã£»´ÓËùÊö¶à¸öÐÞ¸Ä½ÚµãÖÐÈ·¶¨Ò»ÖÖ»ò¶àÖÖÐÞ¸Ä½Úµã×éºÏ£»¸ù¾Ý¸÷ËùÊöÐÞ¸Ä½Úµã×éºÏÈ·¶¨ËùÊöÐÞ¸Ä½Úµã×éºÏËù¶ÔÓ¦µÄÖÐ¼ä½ðÈÚÏµÍ³£¬·Ö±ð»ñÈ¡¸÷ËùÊöÖÐ¼ä½ðÈÚÏµÍ³µÄ²âÊÔÊý¾Ý£»»ùÓÚËùÊö²âÊÔÊý¾Ý£¬´ÓËùÊöÖÐ¼ä½ðÈÚÏµÍ³ÖÐÈ·¶¨Ä¿±ê½ðÈÚÏµÍ³¡£±¾¹«¿ª¿ÉÒÔÌá¸ß½ðÈ…	Êý¾Ý·ÖÎö
¶ÔÖ§¸¶ÏµÍ³ÒµÎñÁ¿ÊµÊ±¼à¿ØµÄ·½·¨ºÍ×°ÖÃ	ÒøÇå¿Æ¼¼£¨±±¾©£©ÓÐÏÞ¹«Ë¾	2019-03-14	2019-07-02	CN109960629A	Ö÷·ÖÀàºÅ£ºG06F11/30(20060101)	ÔÚÉó-¹«¿ª	100195 ±±¾©ÊÐº£µíÇø±±Îë´åÂ·23ºÅ±±Îë´´ÐÂÔ°ÄÏÇø3ºÅÂ¥Ò»²ã112-113	±¾·¢Ã÷Ìá¹©ÁËÒ»ÖÖ¶ÔÖ§¸¶ÏµÍ³ÒµÎñÁ¿ÊµÊ±¼à¿ØµÄ·½·¨ºÍ×°ÖÃ£¬¸Ã·½·¨°üÀ¨£º½ÓÊÕÖ§¸¶ÏµÍ³½»Ò×Êý¾Ý£¬È·¶¨ÔöÁ¿Êý¾Ý£»¶ÔÔöÁ¿Êý¾Ý½øÐÐ·Ö²¼Ê½´¦Àí£»¶Ô·Ö²¼Ê½´¦ÀíºóµÄÔöÁ¿Êý¾ÝÊµÊ±¼à¿Ø£¬È·¶¨ÐÂÔö¼ÇÂ¼ÇÒ½»Ò×³É¹¦µÄÔöÁ¿Êý¾Ý¡£±¾·¢Ã÷Í¨¹ý¶ÔÐÂÔö¼ÇÂ¼ÇÒ½»Ò×³É¹¦µÄÔöÁ¿Êý¾Ý½øÐÐÊµÊ±¼à¿Ø£¬ÄÜ¹»½â¾öÁËÏÖÓÐÒµÎñ¼à¿ØÏµÍ³Ê±Ð§ÐÔ²îÎÊÌâ£¬Ê¹µÃÊý¾Ý´¦ÀíÏìÓ¦Ê±¼äËõ¶Ì£¬Æ½¾ù´¦ÀíÑÓ³Ù±äÐ¡£¬ÄÜ¹»Âú×ãÉú²úÏµÍ³²¢·¢ÒµÎñ´¦ÀíºÍÊµÊ±Í³¼ÆµÄÐèÇó¡£	Ö§¸¶
Ò»ÖÖÈ·¶¨½ðÈÚ²âÊÔ¶ÔÏóµÄ·½·¨¼°×°ÖÃ	ÉÏº£ÉÏºþÐÅÏ¢¼¼ÊõÓÐÏÞ¹«Ë¾	2019-03-26	2019-06-25	CN109933534A	Ö÷·ÖÀàºÅ£ºG06F11/36(2006.01)I	ÔÚÉó-¹«¿ª	200135 ÉÏº£ÊÐÆÖ¶«ÐÂÇø×ÔÓÉÃ³Ò×ÊÔÑéÇøµ¤¹ðÂ·999Åª20ºÅ8Â¥802ÊÒ	±¾·¢Ã÷Ìá¹©Ò»ÖÖÈ·¶¨½ðÈÚ²âÊÔ¶ÔÏóµÄ·½·¨¼°×°ÖÃ£¬Éæ¼°²âÊÔ¼¼ÊõÁìÓò£¬·½·¨°üÀ¨£ºÔÚÆô¶¯mock²âÊÔºó£¬»ñÈ¡Éú³É½ðÈÚ²âÊÔ¶ÔÏóµÄ²âÊÔÇëÇó£»¸ù¾Ý²âÊÔÇëÇóÈ·¶¨²âÊÔÇëÇó¶ÔÓ¦µÄ²âÊÔ¶ÔÏóÄ£°åÒÔ¼°ËùÊö²âÊÔÇëÇó¶ÔÓ¦µÄÂß¼­Ëã·¨£»¸ù¾ÝËùÊö²âÊÔÇëÇó¡¢ËùÊö²âÊÔ¶ÔÏóÄ£°åÒÔ¼°ËùÊö²âÊÔÇëÇó¶ÔÓ¦µÄÂß¼­Ëã·¨È·¶¨½ðÈÚ²âÊÔ¶ÔÏó¡£±¾·¢Ã÷ÊµÊ©ÀýÖÐ£¬ÔÚ½øÐÐmock²âÊÔÊ±£¬Í¨¹ýÉú³É½ðÈÚ²âÊÔ¶ÔÏóµÄ²âÊÔÇëÇóÀ´È·¶¨²âÊÔÇëÇó¶ÔÓ¦µÄÄ£°åÒÔ¼°¶ÔÓ¦µÄÂß¼­Ëã·¨£¬ÓÉÓÚ½ðÈÚ²âÊÔ¶…	Êý¾Ý·ÖÎö
Ò»ÖÖÒøÐÐÈí¼þÏµÍ³²âÊÔ·½·¨¡¢×°ÖÃ¡¢µç×ÓÉè±¸¼°´æ´¢½éÖÊ	Æ½°²ÆÕ»ÝÆóÒµ¹ÜÀíÓÐÏÞ¹«Ë¾	2019-04-19	2019-08-23	CN110162465A	Ö÷·ÖÀàºÅ£ºG06F11/36(20060101)	ÔÚÉó-¹«¿ª	518000 ¹ã¶«Ê¡ÉîÛÚÊÐÇ°º£Éî¸ÛºÏ×÷ÇøÇ°ÍåÒ»Â·1ºÅA¶°201ÊÒ	±¾·¢Ã÷Éæ¼°Èí¼þ²âÊÔ¼¼ÊõÁìÓò£¬½ÒÊ¾ÁËÒ»ÖÖÒøÐÐÈí¼þÏµÍ³²âÊÔ·½·¨¡¢×°ÖÃ¡¢µç×ÓÉè±¸¼°´æ´¢½éÖÊ¡£ËùÊö·½·¨°üÀ¨£ºÍ¨¹ýµ÷ÓÃÒøÐÐ½Ó¿Ú¶ÔÑù±¾Êý¾Ý½øÐÐ²âÊÔ´¦Àí»ñµÃÑù±¾²âÊÔ½á¹û£¬²¢·ÖÎöÑù±¾Êý¾ÝÓëÑù±¾²âÊÔ½á¹ûµÃµ½ÒøÐÐ½Ó¿Ú¶ÔÓ¦µÄÊý¾Ý´¦Àí¹æÔò£¬´Ó¶ø¸ù¾ÝÊý¾Ý´¦Àí¹æÔò±àÐ´Êý¾Ý´¦Àí½Å±¾£¬ÓÃÓÚ¶Ô´ý²âÊÔÊý¾Ý½øÐÐ²âÊÔ´¦Àí£¬µÃµ½Ä¿±ê²âÊÔ½á¹û¡£´Ó¶øÊµÏÖÁË²âÊÔÁ÷³Ì²»ÒÀÀµÓÚÒøÐÐÏµÍ³»·¾³£¬²âÊÔ½ø¶È²»ÊÜÒøÐÐÏµÍ³´¦ÀíËÙ¶ÈµÄÓ°Ïì£¬Ìá¸ßÁË²âÊÔÐ§ÂÊ¡£	Êý¾Ý·ÖÎö
Ò»ÖÖ»ùÓÚÈÝÆ÷ÔÆµÄÑ¹Á¦²âÊÔ·½·¨¼°ÏµÍ³	ÖÐ¹ú¹¤ÉÌÒøÐÐ¹É·ÝÓÐÏÞ¹«Ë¾	2019-04-28	2019-08-23	CN110162471A	Ö÷·ÖÀàºÅ£ºG06F11/36(20060101)	ÔÚÉó-¹«¿ª	100140 ±±¾©ÊÐÎ÷³ÇÇø¸´ÐËÃÅÄÚ´ó½Ö55ºÅ	±¾·¢Ã÷Ìá¹©ÁËÒ»ÖÖ»ùÓÚÈÝÆ÷ÔÆµÄÑ¹Á¦²âÊÔ·½·¨¼°ÏµÍ³£¬¸Ã·½·¨°üÀ¨£º¸ù¾ÝËù½ÓÊÕÑ¹²âÈÎÎñµÄÑ¹²âÒªËØ×é×°Ñ¹²â½Å±¾£»¶ÔÑ¹²â½Å±¾±¨ÎÄÌåÖÐÔÚÑ¹²â¹ý³ÌÖÐÐèÒª±ä»¯µÄÖµ½øÐÐ²ÎÊý»¯£¬²¢½áºÏÑ¹²âÊý¾Ý½«²ÎÊý»¯µÄÖµÌæ»»³É²»Í¬µÄÊý¾Ý£¬ÒÔÔÚÔËÐÐÑ¹²â½Å±¾Ê±Éú³ÉÓÐÐ§µÄÑ¹²â±¨ÎÄ£»¸ù¾ÝÑ¹²âÈÎÎñµÄ²¢·¢Êý¼ÆËãËùÐèÈÝÆ÷ÊýÁ¿²¢ÔÚDockerÈÝÆ÷ÔÆÉÏÉú³ÉÏàÓ¦ÊýÁ¿µÄÈÝÆ÷£»½«°üº¬Ñ¹²âÊý¾ÝµÄÑ¹²â½Å±¾·Ö·¢¸øËùÉú³ÉµÄÈÝÆ÷½øÐÐÑ¹Á¦²âÊÔ¡£±¾·¢Ã÷ÊµÏÖÁË´«Í³Ñ¹Á¦³ÉÇ§±¶ÉÏÉýµ…	Êý¾Ý·ÖÎö
Ò»ÖÖÈí¼þ²âÊÔ·½·¨¼°×°ÖÃ	ÉîÛÚÇ°º£Î¢ÖÚÒøÐÐ¹É·ÝÓÐÏÞ¹«Ë¾	2019-05-10	2019-08-30	CN110188036A	Ö÷·ÖÀàºÅ£ºG06F11/36(20060101)	ÔÚÉó-¹«¿ª	518027 ¹ã¶«Ê¡ÉîÛÚÊÐÇ°º£Éî¸ÛºÏ×÷ÇøÇ°ÍåÒ»Â·1ºÅA¶°201ÊÒ	±¾·¢Ã÷ÊµÊ©ÀýÉæ¼°½ðÈÚ¿Æ¼¼¼¼ÊõÁìÓò£¬ÓÈÆäÉæ¼°Ò»ÖÖÈí¼þ²âÊÔ·½·¨¼°×°ÖÃ£¬ÓÃÒÔ¼ò»¯²âÊÔ¹ý³Ì£¬Ìá¸ß²âÊÔÐ§ÂÊ¡£±¾·¢Ã÷ÊµÊ©Àý°üÀ¨£º»ñÈ¡ÓÃ»§ÉÏ´«µÄµÚÒ»²âÊÔÊý¾Ý£»¸ù¾ÝËùÊöµÚÒ»²âÊÔÊý¾Ý¼°²âÊÔ°æ±¾µÄ²âÊÔ½Ó¿Ú£¬È·¶¨ËùÊö²âÊÔ½Ó¿ÚÐèÒªµÄµÚ¶þ²âÊÔÊý¾Ý£»¸ù¾ÝËùÊöµÚÒ»²âÊÔÊý¾Ý¼°ËùÊöµÚ¶þ²âÊÔÊý¾Ý£¬Éú³ÉËùÊö²âÊÔ½Ó¿ÚµÄ²âÊÔÇëÇó£»»ñÈ¡ËùÊö²âÊÔ°æ±¾»ùÓÚËùÊö²âÊÔÇëÇó·µ»ØµÄµÚÒ»ÏìÓ¦±¨ÎÄ¼°ËùÊö²âÊÔ½Ó¿Ú¶ÔÓ¦µÄ»ùÏß°æ±¾»ùÓÚËùÊö²âÊÔÇëÇó·µ»ØµÄµÚ¶þÏìÓ¦±…	Êý¾Ý·ÖÎö
·þÎñÆ÷Ó²ÅÌ¹ÜÀí·½·¨¡¢×°ÖÃ¡¢Éè±¸¼°¼ÆËã»ú¿É¶Á´æ´¢½éÖÊ	ÉîÛÚÇ°º£Î¢ÖÚÒøÐÐ¹É·ÝÓÐÏÞ¹«Ë¾	2019-05-13	2019-08-09	CN110109790A	Ö÷·ÖÀàºÅ£ºG06F11/22(20060101)	ÔÚÉó-¹«¿ª	518000 ¹ã¶«Ê¡ÉîÛÚÊÐÇ°º£Éî¸ÛºÏ×÷ÇøÇ°ÍåÒ»Â·1ºÅA¶°201ÊÒ(Èë×¤ÉîÛÚÊÐÇ°º£ÉÌÎñÃØÊéÓÐÏÞ¹«Ë¾)	±¾·¢Ã÷Éæ¼°½ðÈÚ¿Æ¼¼ÁìÓò£¬²¢¹«¿ªÁËÒ»ÖÖ·þÎñÆ÷Ó²ÅÌ¹ÜÀí·½·¨¡¢×°ÖÃ¡¢Éè±¸¼°¼ÆËã»ú¿É¶Á´æ´¢½éÖÊ£¬¸Ã·½·¨°üÀ¨£ºÈô¼ì²âµ½µ±Ç°¹ÜÀí½ÚµãÖÐÐÂÔöÄ¿±ê·þÎñÆ÷£¬»ñÈ¡ÓëËùÊöÄ¿±ê·þÎñÆ÷¶ÔÓ¦µÄ·þÎñÆ÷Ó²ÅÌµÄÓ²ÅÌÐÅÏ¢£¬²¢¶ÔËùÊö·þÎñÆ÷Ó²ÅÌ±ê¼ÇµÚÒ»×´Ì¬£»½ÓÊÕÓÃ»§¶Ë·¢ËÍµÄÕë¶ÔËùÊö·þÎñÆ÷Ó²ÅÌµÄ²Ù×÷ÑéÖ¤ÇëÇó£»»ùÓÚËùÊöÓ²ÅÌÐÅÏ¢£¬¶ÔËùÊö²Ù×÷ÑéÖ¤ÇëÇó½øÐÐÑéÖ¤£»ÈôËùÊö²Ù×÷ÑéÖ¤ÇëÇóÍ¨¹ýÑéÖ¤£¬Ôò·µ»ØÑéÖ¤½á¹ûÖÁËùÊöÓÃ»§¶Ë£¬²¢½«ËùÊöµÚÒ»×´Ì¬ÐÞ¸ÄÎªÓëËùÊö²…	Êý¾Ý·ÖÎö
Ò»ÖÖÕï¶ÏSparkÓ¦ÓÃµÄ·½·¨¼°×°ÖÃ	ÉîÛÚÇ°º£Î¢ÖÚÒøÐÐ¹É·ÝÓÐÏÞ¹«Ë¾	2019-05-23	2019-08-27	CN110175124A	Ö÷·ÖÀàºÅ£ºG06F11/36(20060101)	ÔÚÉó-¹«¿ª	518027 ¹ã¶«Ê¡ÉîÛÚÊÐÇ°º£Éî¸ÛºÏ×÷ÇøÇ°ÍåÒ»Â·1ºÅA¶°201ÊÒ	±¾·¢Ã÷Éæ¼°½ðÈÚ¿Æ¼¼ÁìÓò£¬²¢¹«¿ªÁËÒ»ÖÖÕï¶ÏSparkÓ¦ÓÃµÄ·½·¨¼°×°ÖÃ£¬ÆäÖÐ£¬·½·¨°üÀ¨£º»ñÈ¡SparkÓ¦ÓÃµÄÉÏÏÂÎÄÐÅÏ¢£¬¸ù¾ÝÉÏÏÂÎÄÐÅÏ¢È·¶¨SparkÓ¦ÓÃµÄÕï¶ÏÖ¸±êºÍÕï¶ÏÖ¸±ê¶ÔÓ¦µÄÖ¸±ê¹æÔò£¬¸ù¾ÝSparkÓ¦ÓÃµÄÕï¶ÏÖ¸±ê£¬²É¼¯SparkÓ¦ÓÃÔÚÔËÐÐ¹ý³ÌÖÐÕï¶ÏÖ¸±ê¶ÔÓ¦µÄÔËÐÐÐÅÏ¢£¬²¢¸ù¾ÝÕï¶ÏÖ¸±ê¶ÔÓ¦µÄÖ¸±ê¹æÔò¶ÔÕï¶ÏÖ¸±ê¶ÔÓ¦µÄÔËÐÐÐÅÏ¢½øÐÐÕï¶Ï£¬È·¶¨SparkÓ¦ÓÃµÄÕï¶Ï½á¹û¡£±¾¼¼Êõ·½°¸ÔÚSparkÓ¦ÓÃÔËÐÐ¹ý³ÌÖÐ£¬ÊµÊ±²É¼¯SparkÓ¦ÓÃµÄÔËÐÐÖ¸±ê£¬¶ÔSpark…	Êý¾Ý·ÖÎö
ÐÅÓÃ¿¨ÕË»§×Ô¶¯²âÊÔ·½·¨¡¢×°ÖÃ¡¢µç×ÓÉè±¸¼°´æ´¢½éÖÊ	Æ½°²ÒøÐÐ¹É·ÝÓÐÏÞ¹«Ë¾	2019-05-27	2019-10-25	CN110377498A	Ö÷·ÖÀàºÅ£ºG06F11/36(20060101)	ÔÚÉó-¹«¿ª	518000 ¹ã¶«Ê¡ÉîÛÚÊÐÂÞºþÇøÉîÄÏ¶«Â·5047ºÅ	Ò»ÖÖÐÅÓÃ¿¨ÕË»§×Ô¶¯²âÊÔ·½·¨£¬°üÀ¨£º½«ÓÃ»§ÉÏ´«µÄ²ßÂÔ°üÊäËÍÖÁ»Ò¶È»·¾³ÖÐ£»Ö´ÐÐÆðÅúÈÎÎñ£»µ±ÆðÅú×´Ì¬Îª³É¹¦×´Ì¬Ê±£¬»ñÈ¡·þÎñÆ÷ÈÕÖ¾ÖÐµÄËÍ²ßÂÔ°üµÄ¶à¸ö²ÎÊý£»»ñÈ¡Ë÷ÒýÓëÈÕÖ¾ÖÐµÄËÍ²ßÂÔ°üµÄ¶à¸ö²ÎÊýµÄÐòºÅÏàÍ¬µÄÄ¿±êË÷Òý¶ÔÓ¦µÄÄ¿±êÕæÊµ²ÎÊý£»¼ÆËãÈÕÖ¾ÖÐµÄËÍ²ßÂÔ°üµÄ¶à¸ö²ÎÊýµÄµÚÒ»¹þÏ£Öµ¼°Ä¿±êÕæÊµ²ÎÊýµÄµÚ¶þ¹þÏ£Öµ£»µ±È·¶¨Ä¿±êµÚÒ»¹þÏ£ÖµÓë¶ÔÓ¦µÄÄ¿±êµÚ¶þ¹þÏ£Öµ²»ÏàÍ¬Ê±£¬Êä³ö¶ÔÓ¦µÄËÍ²ßÂÔ°üµÄ²ÎÊýºÍÄ¿±êÕæÊµ²ÎÊý¡£±¾·¢Ã÷»¹Ìá¹©Ò»Ö…	°²È«
Ñ¹Á¦²âÊÔ·½·¨¡¢×°ÖÃ¡¢ÏµÍ³¡¢Éè±¸¼°¼ÆËã»ú¿É¶Á´æ´¢½éÖÊ	ÉîÛÚÇ°º£Î¢ÖÚÒøÐÐ¹É·ÝÓÐÏÞ¹«Ë¾	2019-05-31	2019-08-27	CN110175110A	Ö÷·ÖÀàºÅ£ºG06F11/34(20060101)	ÔÚÉó-¹«¿ª	518000 ¹ã¶«Ê¡ÉîÛÚÊÐÇ°º£Éî¸ÛºÏ×÷ÇøÇ°ÍåÒ»Â·1ºÅA¶°201ÊÒ(Èë×¤ÉîÛÚÊÐÇ°º£ÉÌÎñÃØÊéÓÐÏÞ¹«Ë¾)	±¾·¢Ã÷Éæ¼°½ðÈÚ¿Æ¼¼ÁìÓò£¬²¢¹«¿ªÁËÒ»ÖÖÑ¹Á¦²âÊÔ·½·¨£¬°üÀ¨ÈçÏÂ²½Öè£ºÔÚ½ÓÊÕµ½Ñ¹Á¦²âÊÔÇëÇóÊ±£¬È·¶¨ËùÊöÑ¹Á¦²âÊÔÇëÇó¶ÔÓ¦±»²âµÄÄ¿±ê·þÎñÆ÷£¬¼°ËùÊöÄ¿±ê·þÎñÆ÷¶ÔÓ¦µÄÑ¹Á¦²âÊÔÅäÖÃÐÅÏ¢ºÍ²âÊÔÄ¿±êÖµ£»¸ù¾ÝËùÊöÑ¹Á¦²âÊÔÅäÖÃÐÅÏ¢ºÍËùÊö²âÊÔÄ¿±êÖµÏòËùÊöÄ£Äâ¿Í»§¶Ë·¢ËÍµ÷¶ÈÖ¸Áî£¬ÒÔÊ¹ËùÊöÄ£Äâ¿Í»§¶Ë¸ù¾ÝËùÊöµ÷¶ÈÖ¸Áîµ÷ÕûÏß³ÌÊýÁ¿ÏòËùÊöÄ¿±ê·þÎñÆ÷·¢ËÍ²âÊÔÈÎÎñ£»ÔÚ¼ì²âµ½ËùÊöÄ¿±ê·þÎñÆ÷Ö´ÐÐËùÊö²âÊÔÈÎÎñÊ±£¬»ñÈ¡ËùÊöÄ¿±ê·þÎñÆ÷¶ÔÓ¦µÄÐÄÌøÊ…	Êý¾Ý·ÖÎö
´û¿îÊý¾Ý±¸·Ý·½·¨¼°ÏµÍ³	ÉîÛÚÖÐÐË·É´û½ðÈÚ¿Æ¼¼ÓÐÏÞ¹«Ë¾	2019-06-06	2019-10-01	CN110297727A	Ö÷·ÖÀàºÅ£ºG06F11/14(20060101)	ÔÚÉó-¹«¿ª	518000 ¹ã¶«Ê¡ÉîÛÚÊÐÄÏÉ½ÇøÔÁº£½ÖµÀ¿ÆÔ·Â·11ºÅ½ðÈÚ¿Æ¼¼´óÏÃA×ù¶þÊ®²ãA¡¢B¡¢C¡¢Dµ¥Ôª,¶þÊ®¶þ²ãA¡¢Bµ¥Ôª	±¾ÉêÇëÊµÊ©ÀýÌá¹©Ò»ÖÖ´û¿îÊý¾Ý±¸·Ý·½·¨¼°ÏµÍ³£¬Éæ¼°ÖÕ¶Ë¼¼ÊõÁìÓò£¬ÆäÖÐ·½·¨°üÀ¨£º·þÎñÆ÷Ñ¡Ôñ¶à¸öÒÆ¶¯ÖÕ¶ËÖÐµÄ¿Í»§¶Ë×÷Îª±¸·Ý¿Í»§¶Ë£¬Ã¿¸ö±¸·Ý¿Í»§¶Ë¶ÔÆäËû±¸·Ý¿Í»§¶ËµÄ´û¿îÊý¾Ý½øÐÐ±¸·Ý£¬Ã¿¸ö±¸·Ý¿Í»§¶Ë»ñÈ¡ÆäËû±¸·Ý¿Í»§¶ËµÄÐÐÎªÊý¾Ý£¬²¢¸ù¾ÝÐÐÎªÊý¾ÝÆÀ¹ÀÆäËû±¸·Ý¿Í»§¶ËµÄÐÐÎª·ÖÊý£¬·þÎñÆ÷»ã×Ü¶à¸ö±¸·Ý¿Í»§¶ËÆÀ¹ÀµÄÐÐÎª·ÖÊý£¬²¢¸ù¾ÝÐÐÎª·ÖÊý´¦ÀíÃ¿¸ö±¸·Ý¿Í»§¶Ë¡£±¾ÉêÇë¿É½µµÍ±¸·Ý´û¿îÊý¾ÝµÄ³É±¾¡£	½è´û
Ò»ÖÖÊý¾Ý´¦Àí·½·¨¼°×°ÖÃ	ÉîÛÚÇ°º£Î¢ÖÚÒøÐÐ¹É·ÝÓÐÏÞ¹«Ë¾	2019-06-10	2019-09-24	CN110275917A	Ö÷·ÖÀàºÅ£ºG06F16/25(20190101)	ÔÚÉó-¹«¿ª	518027 ¹ã¶«Ê¡ÉîÛÚÊÐÇ°º£Éî¸ÛºÏ×÷ÇøÇ°ÍåÒ»Â·1ºÅA¶°201ÊÒ	±¾·¢Ã÷¹«¿ªÁËÒ»ÖÖÊý¾Ý´¦Àí·½·¨¼°×°ÖÃ£¬Éæ¼°Êý¾Ý´¦ÀíÁìÓò£¬ÆäÖÐ·½·¨°üÀ¨£º¶ÔÔ´¶Ë·Ö²¼Ê½¼Ü¹¹Êý¾Ý¿â·¢ÆðN¸öÊý¾Ý³éÈ¡¡¢×ª»»ºÍ×°ÔØETL½ø³Ì£»NÎª´óÓÚ0µÄÕûÊý£»ËùÊöN¸öETL½ø³ÌÓÃÓÚÔÚÊý¾Ý²Ö¿âÖÐÉú³ÉµÚÒ»Ä¿±ê±í£»µ±ËùÊöN¸öETL½ø³ÌÔÚÖ´ÐÐ¹ý³ÌÖÐ´æÔÚM¸öÊ§°ÜµÄETL½ø³ÌÊ±£¬ÖØÐÂ·¢ÆðËùÊöN¸öETL½ø³Ì£»µ±ÖØÐÂ·¢ÆðµÄËùÊöN¸öETL½ø³Ì³É¹¦Ö´ÐÐÊ±£¬»ñÈ¡ÖØÐÂ·¢ÆðµÄËùÊöN¸öETL½ø³ÌÔÚËùÊöÊý¾Ý²Ö¿âÖÐÉú³ÉµÄËùÊöµÚÒ»Ä¿±ê±í£¬ÒÔ¼°¶ÔËùÊöµÚÒ»Ä¿±ê±í½øÐÐÍ³¼Æ»ã×…	Êý¾Ý·ÖÎö
Êý¾Ý¿â¸æ¾¯´¦Àí·½·¨¡¢×°ÖÃ¡¢Éè±¸¼°¼ÆËã»ú¿É¶Á´æ´¢½éÖÊ	ÉîÛÚÇ°º£Î¢ÖÚÒøÐÐ¹É·ÝÓÐÏÞ¹«Ë¾	2019-06-12	2019-09-10	CN110221936A	Ö÷·ÖÀàºÅ£ºG06F11/07(20060101)	ÔÚÉó-¹«¿ª	518052 ¹ã¶«Ê¡ÉîÛÚÊÐÄÏÉ½ÇøÉ³ºÓÎ÷Â·1819ºÅÉîÛÚÍå¿Æ¼¼ÉúÌ¬Ô°7¶°A×ù	±¾·¢Ã÷Éæ¼°½ðÈÚ¿Æ¼¼ÁìÓò£¬²¢¹«¿ªÁËÒ»ÖÖÊý¾Ý¿â¸æ¾¯´¦Àí·½·¨£¬¸Ã·½·¨°üÀ¨£ºµ±¼ì²âµ½Ö÷»ú²úÉúÊý¾Ý¿â¸æ¾¯Ê±£¬»ñÈ¡ËùÊöÊý¾Ý¿â¸æ¾¯µÄÊý¾Ý¿âÀàÐÍºÍ¸æ¾¯Ö¸±ê£»¸ù¾ÝËùÊöÊý¾Ý¿âÀàÐÍºÍËùÊö¸æ¾¯Ö¸±ê²éÕÒÔ¤ÉèµÄ¸æ¾¯´¦ÀíÅäÖÃ±í£¬µÃµ½´ý»ñÈ¡µÄÊý¾Ý¿âÏÖ³¡ÐÅÏ¢µÄÖÖÀà£»¸ù¾ÝËùÊö´ý»ñÈ¡µÄÊý¾Ý¿âÏÖ³¡ÐÅÏ¢µÄÖÖÀà£¬²É¼¯¶ÔÓ¦µÄÊý¾Ý¿âÏÖ³¡ÐÅÏ¢£»¸ù¾ÝËùÊöÊý¾Ý¿âÏÖ³¡ÐÅÏ¢È·¶¨ËùÊöÊý¾Ý¿â¸æ¾¯µÄ¸ùÒò¡£±¾·¢Ã÷»¹¹«¿ªÁËÒ»ÖÖÊý¾Ý¿â¸æ¾¯´¦Àí×°ÖÃ¡¢Éè±¸ºÍÒ»ÖÖ¼ÆËã»ú¿…	Êý¾Ý·ÖÎö
Ò»ÖÖSpark×÷ÒµµÄÌá½»·½·¨¼°×°ÖÃ	ÉîÛÚÇ°º£Î¢ÖÚÒøÐÐ¹É·ÝÓÐÏÞ¹«Ë¾	2019-06-12	2019-09-20	CN110262881A	Ö÷·ÖÀàºÅ£ºG06F9/48(20060101)	ÔÚÉó-¹«¿ª	518027 ¹ã¶«Ê¡ÉîÛÚÊÐÇ°º£Éî¸ÛºÏ×÷ÇøÇ°ÍåÒ»Â·1ºÅA¶°201ÊÒ	±¾·¢Ã÷Éæ¼°½ðÈÚ¿Æ¼¼ÁìÓò£¬²¢¹«¿ªÁËÒ»ÖÖSpark×÷ÒµµÄÌá½»·½·¨¼°×°ÖÃ£¬ÆäÖÐ£¬·½·¨°üÀ¨£º½ÓÊÕSpark×÷ÒµµÄÖ´ÐÐÇëÇó£¬¸ù¾ÝÖ´ÐÐÇëÇó£¬»ñÈ¡Yarn¼¯ÈºµÄ½ÚµãºÚÃûµ¥£¬¸ù¾ÝÖ´ÐÐÇëÇóÖÐSpark×÷ÒµµÄ×÷Òµ²ÎÊý¡¢Yarn¼¯ÈºµÄ½ÚµãºÚÃûµ¥£¬´´½¨SparkÒýÇæ£¬Í¨¹ýSparkÒýÇæ½«Spark×÷Òµ·¢ËÍÖÁYarn¼¯Èº¡£¸Ã¼¼Êõ·½°¸Í¨¹ý»ñÈ¡Yarn¼¯ÈºÖÐ¹ÊÕÏ½Úµã£¬±ÜÃâ½«Spark×÷ÒµÌá½»ÖÁ¹ÊÕÏ½Úµã£¬ÒÔÊµÏÖSpark×÷ÒµµÄ¸ßÐ§Ö´ÐÐ¡£	Êý¾Ý·ÖÎö
Êý¾ÝÑø³ÉÎ¬»¤·½·¨¡¢×°ÖÃ¡¢Éè±¸¼°¼ÆËã»ú´æ´¢½éÖÊ	ÉîÛÚÇ°º£Î¢ÖÚÒøÐÐ¹É·ÝÓÐÏÞ¹«Ë¾	2019-06-14	2019-09-20	CN110262973A	Ö÷·ÖÀàºÅ£ºG06F11/36(20060101)	ÔÚÉó-¹«¿ª	518052 ¹ã¶«Ê¡ÉîÛÚÊÐÄÏÉ½ÇøÉ³ºÓÎ÷Â·1819ºÅÉîÛÚÍå¿Æ¼¼ÉúÌ¬Ô°7¶°A×ù	±¾·¢Ã÷Éæ¼°½ðÈÚ¿Æ¼¼(Fintech)¼¼ÊõÁìÓò£¬²¢¹«¿ªÁËÒ»ÖÖÊý¾ÝÑø³ÉÎ¬»¤·½·¨£¬¸Ã·½·¨°üÀ¨£º¶ÔÏßÉÏ²úÆ·µÄ¸÷²úÆ·´æÁ¿Êý¾Ý½øÐÐÊý¾Ý·ÖÎö£¬ÒÔ»ñÈ¡¸÷²úÆ·´æÁ¿Êý¾ÝµÄÊý¾ÝÐÎÌ¬·Ö²¼£»»ùÓÚÊý¾ÝÐÎÌ¬·Ö²¼È·¶¨Êý¾ÝÐÎÌ¬Ä£ÐÍºÍÖ´ÐÐ¶¯×÷Ä£ÐÍ£¬²¢»ùÓÚÊý¾ÝÐÎÌ¬Ä£ÐÍºÍÖ´ÐÐ¶¯×÷Ä£ÐÍÈ·¶¨¸÷²úÆ·´æÁ¿Êý¾Ý¶ÔÓ¦µÄ¶¯×÷Ö´ÐÐÐòÁÐ£»»ñÈ¡¸÷²úÆ·´æÁ¿Êý¾Ý¶ÔÓ¦µÄÉúÃüÖÜÆÚ¹æ»®£¬²¢»ùÓÚÉúÃüÖÜÆÚ¹æÔòºÍ¸÷¶¯×÷Ö´ÐÐÐòÁÐÒÀ´Î»ñÈ¡Êý¾ÝÐÎÌ¬·Ö²¼ÖÐ¸÷Êý¾ÝÐÎÌ¬¶ÔÓ¦µÄÅú´Î¼Æ»®£»»ùÓÚÅú…	Êý¾Ý·ÖÎö
Òì³£Êý¾Ý·ÖÎö·½·¨¡¢×°ÖÃ¡¢Éè±¸Óë¼ÆËã»ú¿É¶Á´æ´¢½éÖÊ	ÉîÛÚÇ°º£Î¢ÖÚÒøÐÐ¹É·ÝÓÐÏÞ¹«Ë¾	2019-06-17	2019-09-20	CN110262919A	Ö÷·ÖÀàºÅ£ºG06F11/07(20060101)	ÔÚÉó-¹«¿ª	518052 ¹ã¶«Ê¡ÉîÛÚÊÐÄÏÉ½ÇøÉ³ºÓÎ÷Â·1819ºÅÉîÛÚÍå¿Æ¼¼ÉúÌ¬Ô°7¶°A×ù	±¾·¢Ã÷Éæ¼°½ðÈÚ¿Æ¼¼ÁìÓò£¬²¢¹«¿ªÁËÒ»ÖÖÒì³£Êý¾Ý·ÖÎö·½·¨£¬°üÀ¨£ºÍ¨¹ýÊý¾Ý²É¼¯×°ÖÃ²É¼¯¼à¿ØÔ´µÄÀúÊ·Êý¾Ý£¬²¢¶ÔËùÊöÀúÊ·Êý¾Ý½øÐÐÇåÏ´£¬ÒÔµÃµ½ËùÊöÀúÊ·Êý¾Ý¶ÔÓ¦µÄÄ¿±êÊý¾Ý¼¯£»»ùÓÚÔ¤ÉèËã·¨£¬¶ÔËùÊöÄ¿±êÊý¾Ý¼¯½øÐÐ¾ÛÀà·ÖÎö£¬ÒÔµÃµ½ËùÊöÄ¿±êÊý¾Ý¼¯¶ÔÓ¦µÄ½á¹û´Ø£»»ùÓÚËùÊö½á¹û´Ø£¬È·¶¨ËùÊö¼à¿ØÔ´µÄÒì³£ÎÊÌâ¡£±¾·¢Ã÷»¹¹«¿ªÁËÒ»ÖÖÒì³£Êý¾Ý·ÖÎö×°ÖÃ¡¢Éè±¸ºÍÒ»ÖÖ¼ÆËã»ú¿É¶Á´æ´¢½éÖÊ¡£±¾·¢Ã÷Í¨¹ý¶Ô¼à¿ØÔ´µÄÀúÊ·Êý¾Ý½øÐÐÇåÏ´¾ÛÀà£¬´Ó¶ø·ÖÎö³öÒ…	Êý¾Ý·ÖÎö
²âÊÔÊý¾Ý¹ÜÀí·½·¨¡¢×°ÖÃ¡¢Éè±¸¼°¼ÆËã»ú¿É¶Á´æ´¢½éÖÊ	ÉîÛÚÇ°º£Î¢ÖÚÒøÐÐ¹É·ÝÓÐÏÞ¹«Ë¾	2019-06-20	2019-09-20	CN110262975A	Ö÷·ÖÀàºÅ£ºG06F11/36(20060101)	ÔÚÉó-¹«¿ª	518052 ¹ã¶«Ê¡ÉîÛÚÊÐÄÏÉ½ÇøÉ³ºÓÎ÷Â·1819ºÅÉîÛÚÍå¿Æ¼¼ÉúÌ¬Ô°7¶°A×ù	±¾·¢Ã÷Éæ¼°½ðÈÚ¿Æ¼¼ÁìÓò£¬²¢¹«¿ªÁËÒ»ÖÖ²âÊÔÊý¾Ý¹ÜÀí·½·¨£¬¸Ã·½·¨°üÀ¨£ºµ±¼ì²âµ½ÒµÎñÏµÍ³µ±Ç°Åú´ÎµÄÅú´ÎÈÎÎñÖ´ÐÐÍê³ÉÊ±£¬´ÓËùÊöÒµÎñÏµÍ³µÄÊý¾Ý¿âÖÐ×¥È¡ËùÊöµ±Ç°Åú´ÎµÄ²âÊÔÊý¾Ý£¬²¢»ñÈ¡ËùÊöµ±Ç°Åú´ÎµÄÅú´Î±êÊ¶£»½«ËùÊö²âÊÔÊý¾ÝÓëËùÊöÅú´Î±êÊ¶Ïà¹ØÁª£¬ÒÔÉú³ÉËùÊöµ±Ç°Åú´ÎµÄÊý¾ÝÇÐÆ¬£»½«ËùÊöÊý¾ÝÇÐÆ¬ÓëÔ¤ÉèµÄ²âÊÔÓÃÀýÏà¹ØÁªºó±£´æ¡£±¾·¢Ã÷»¹¹«¿ªÁËÒ»ÖÖ²âÊÔÊý¾Ý¹ÜÀí×°ÖÃ¡¢Éè±¸ºÍÒ»ÖÖ¼ÆËã»ú¿É¶Á´æ´¢½éÖÊ¡£±¾·¢Ã÷½â¾öÁËÏÖÓÐµÄ°æ±¾µü´ú²âÊ…	Êý¾Ý·ÖÎö
Ò»ÖÖÊý¾Ý¿â½Å±¾ÐÔÄÜ²âÊÔµÄ·½·¨¼°×°ÖÃ	ÉîÛÚÇ°º£Î¢ÖÚÒøÐÐ¹É·ÝÓÐÏÞ¹«Ë¾	2019-06-26	2019-09-27	CN110287114A	Ö÷·ÖÀàºÅ£ºG06F11/36(20060101)	ÔÚÉó-¹«¿ª	518027 ¹ã¶«Ê¡ÉîÛÚÊÐÇ°º£Éî¸ÛºÏ×÷ÇøÇ°ÍåÒ»Â·1ºÅA¶°201ÊÒ	±¾·¢Ã÷Éæ¼°½ðÈÚ¿Æ¼¼(Fintech)ÁìÓò£¬²¢¹«¿ªÁËÒ»ÖÖÊý¾Ý¿â½Å±¾ÐÔÄÜ²âÊÔµÄ·½·¨¼°×°ÖÃ£¬¸Ã·½·¨°üÀ¨»ñÈ¡ÏßÉÏÉú²úÊý¾Ý¿âµÄ±íÐÅÏ¢¡¢²âÊÔÊý¾Ý¿âµÄ±íÐÅÏ¢¡¢²âÊÔ¹ý³ÌÖÐµÄÊý¾Ý¿â½Å±¾ÐÅÏ¢£¬¶ÔÊý¾Ý¿â½Å±¾ÐÅÏ¢ÖÐµÄÓï¾ä½øÐÐÔ¤´¦Àí£¬µÃµ½Êý¾Ý¿â½Å±¾ÐÅÏ¢¶ÔÓ¦µÄ³éÏó»¯Óï¾ä£¬È·¶¨³éÏó»¯Óï¾äµÄÖ´ÐÐÆµ´Î£¬¸ù¾ÝÉú²úÊý¾Ý¿âµÄ±íÐÅÏ¢ºÍ/»ò²âÊÔÊý¾Ý¿âµÄ±íÐÅÏ¢¡¢Êý¾Ý¿â½Å±¾ÐÅÏ¢¶ÔÓ¦µÄ³éÏó»¯Óï¾ä¼°³éÏó»¯Óï¾äµÄÖ´ÐÐ¼Æ»®£¬È·¶¨³éÏó»¯Óï¾äµÄÏûºÄ£¬¸ù¾Ý³éÏó»¯Óï¾äµ…	Êý¾Ý·ÖÎö
¹ÊÕÏÑÝÁ··½·¨¡¢×°ÖÃ¡¢Éè±¸¼°¼ÆËã»ú´æ´¢½éÖÊ	ÉîÛÚÇ°º£Î¢ÖÚÒøÐÐ¹É·ÝÓÐÏÞ¹«Ë¾	2019-06-26	2019-10-08	CN110308969A	Ö÷·ÖÀàºÅ£ºG06F9/455(20060101)	ÔÚÉó-¹«¿ª	518000 ¹ã¶«Ê¡ÉîÛÚÊÐÇ°º£Éî¸ÛºÏ×÷ÇøÇ°ÍåÒ»Â·1ºÅA¶°201ÊÒ(Èë×¤ÉîÛÚÊÐÇ°º£ÉÌÎñÃØÊéÓÐÏÞ¹«Ë¾)	±¾·¢Ã÷Éæ¼°½ðÈÚ¿Æ¼¼(Fintech)¼¼ÊõÁìÓò£¬²¢¹«¿ªÁËÒ»ÖÖ¹ÊÕÏÑÝÁ··½·¨£¬¸Ã·½·¨°üÀ¨£ºÔÚ½ÓÊÕµ½¹ÊÕÏÑÝÁ·³¡¾°Ö¸ÁîÊ±£¬¿ØÖÆÑÝÁ·Æ½Ì¨»ùÓÚ¹ÊÕÏÑÝÁ·³¡¾°Ö¸ÁîÔÚ¸÷VMÖÐ»ñÈ¡Ä¿±êVMµÄÊµÀý£¬½«ÊµÀýºÍ¹ÊÕÏÑÝÁ·³¡¾°Ö¸ÁîÍ¨¹ýÑÝÁ·Æ½Ì¨·¢ËÍÖÁ»ìãç¹¤³Ì¹¤¾ß£»Í¨¹ý»ìãç¹¤³Ì¹¤¾ß¶ÔÊµÀý½øÐÐÑÝÁ·£¬Í¨¹ýIMS¼à²âÊµÀýÊÇ·ñÒÑÑÝÁ·Íê³É£»ÈôÑÝÁ·Íê³É£¬ÔòÍ¨¹ýIMSÏòÑÝÁ·Æ½Ì¨·¢ËÍ¸æ¾¯ÐÅÏ¢£¬¿ØÖÆÑÝÁ·Æ½Ì¨ÔÚSOPÖÐ»ñÈ¡»Ö¸´Á÷³Ì£»Í¨¹ýÑÝÁ·Æ½Ì¨½«»Ö¸´Á÷³Ì·¢ËÍÖÁ»ìãç¹¤³Ì¹¤¾ß£…	Êý¾Ý·ÖÎö
ä¯ÀÀÆ÷ÐÔÄÜÊµÊ±¼à¿Ø·½·¨¡¢×°ÖÃ¡¢Éè±¸¼°¿É¶Á´æ´¢½éÖÊ	ÉîÛÚÇ°º£Î¢ÖÚÒøÐÐ¹É·ÝÓÐÏÞ¹«Ë¾	2019-06-28	2019-10-08	CN110309041A	Ö÷·ÖÀàºÅ£ºG06F11/34(20060101)	ÔÚÉó-¹«¿ª	518000 ¹ã¶«Ê¡ÉîÛÚÊÐÇ°º£Éî¸ÛºÏ×÷ÇøÇ°ÍåÒ»Â·1ºÅA¶°201ÊÒ(Èë×¤ÉîÛÚÊÐÇ°º£ÉÌÎñÃØÊéÓÐÏÞ¹«Ë¾)	±¾·¢Ã÷Éæ¼°½ðÈÚ¿Æ¼¼ÁìÓò£¬²¢¹«¿ªÁËÒ»ÖÖä¯ÀÀÆ÷ÐÔÄÜÊµÊ±¼à¿Ø·½·¨£¬°üÀ¨£ºÔÚ½ÓÊÕµ½ÐÔÄÜÂ¼ÖÆÖ¸ÁîÊ±£¬»ñÈ¡ÐÔÄÜÂ¼ÖÆÖ¸Áî¶ÔÓ¦µÄÄ¿±êÍøÒ³£»Í¨¹ý±¾µØÊý¾Ý¿â¼ì²âä¯ÀÀÆ÷±¾µØÊÇ·ñ´´½¨ÓÐµÚÒ»¼à¿ØÊý¾Ý¿â£¬ÆäÖÐ£¬µÚÒ»¼à¿ØÊý¾Ý¿â´æ´¢ÓÐµÚÒ»¼à¿ØÈÎÎñ±í¼°µÚÒ»ÐÔÄÜÖ¸±ê±í£»ÈôÊÇ£¬Ôò¼àÌýÄ¿±êÍøÒ³¶ÔÓ¦µÄµÚÒ»ÊµÊ±Ö¸±êÊý¾Ý£»Í¨¹ý±¾µØÊý¾Ý¿â½«µÚÒ»ÊµÊ±Ö¸±êÊý¾Ý²åÈëµÚÒ»¼à¿ØÊý¾Ý¿âÖÐ£»»ùÓÚµÚÒ»¼à¿ØÈÎÎñ±í¼°µÚÒ»ÐÔÄÜÖ¸±ê±íÉú³ÉµÚÒ»ÇúÏßÍ¼¡£±¾·¢Ã÷»¹¹«¿ªÒ»ÖÖä…	Êý¾Ý·ÖÎö
Ò»ÖÖ»ùÓÚ¸æ¾¯µÄÔËÎ¬·½·¨¼°×°ÖÃ	ÉîÛÚÇ°º£Î¢ÖÚÒøÐÐ¹É·ÝÓÐÏÞ¹«Ë¾	2019-06-28	2019-09-24	CN110275795A	Ö÷·ÖÀàºÅ£ºG06F11/07(20060101)	ÔÚÉó-¹«¿ª	518027 ¹ã¶«Ê¡ÉîÛÚÊÐÇ°º£Éî¸ÛºÏ×÷ÇøÇ°ÍåÒ»Â·1ºÅA¶°201ÊÒ	±¾·¢Ã÷ÊÊÓÃÓÚ½ðÈÚ¿Æ¼¼ÁìÓò£¬²¢¹«¿ªÁËÒ»ÖÖ»ùÓÚ¸æ¾¯µÄÔËÎ¬·½·¨¼°×°ÖÃ£¬ÆäÖÐ£¬·½·¨°üÀ¨£º½ÓÊÕµÚÒ»·þÎñÆ÷µÄ¸æ¾¯ÐÅÏ¢£¬¸ù¾Ý¸æ¾¯ÐÅÏ¢µÄ¸æ¾¯ÀàÐÍ£¬ÈôÈ·¶¨µÚÒ»·þÎñÆ÷ÊÇ¹ÊÕÏ·þÎñÆ÷£¬Ôò¸ù¾Ý¸Ã¸æ¾¯ÐÅÏ¢Éú³ÉÕë¶ÔµÚÒ»·þÎñÆ÷µÄµÚÒ»´¦Àí´ëÊ©£¬½áºÏµÚÒ»·þÎñÆ÷ËùÊôÏµÍ³µÄÔËÐÐÐÅÏ¢ºÍ×ÊÔ´ÐÅÏ¢ÅÐ¶ÏµÚÒ»´¦Àí´ëÊ©ÊÇ·ñ·ûºÏ¸ß¿ÉÓÃÌõ¼þ£¬ÈôÊÇ£¬Ôò¶ÔµÚÒ»·þÎñÆ÷Ö´ÐÐµÚÒ»´¦Àí´ëÊ©¡£¸Ã¼¼Êõ·½°¸ÓÃÒÔÌá¹©½ðÈÚÒµÎñÏµÍ³Òì³£Ê±µÄ×Ô¶¯»¯´¦Àí·½°¸£¬ÇÒ±£ÕÏ½ðÈÚÒµÎñÏµÍ³µ…	Êý¾Ý·ÖÎö
½ðÈÚ×ÊÑ¶·ÖÊ±Í¼Ê¶±ð²âÊÔ·½·¨¡¢´æ´¢½éÖÊ¼°Éè±¸	ÐËÒµÖ¤È¯¹É·ÝÓÐÏÞ¹«Ë¾	2019-07-10	2019-11-12	CN110443705A	Ö÷·ÖÀàºÅ£ºG06Q40/04(20120101)	ÔÚÉó-¹«¿ª	350001¸£½¨Ê¡¸£ÖÝÊÐ¹ÄÂ¥Çøºþ¶«Â·268ºÅÖ¤È¯´óÏÃ	Ò»ÖÖ½ðÈÚ×ÊÑ¶·ÖÊ±Í¼Ê¶±ð²âÊÔ·½·¨¡¢´æ´¢½éÖÊ¼°Éè±¸£¬ÆäÖÐ·½·¨°üÀ¨ÈçÏÂ²½Öè£¬ÔÚÊ¶±ð²âÊÔ¿ªÊ¼ºó£¬»ñÈ¡ÔËÐÐ½ðÈÚ×ÊÑ¶Èí¼þµÄÉè±¸µÄÆÁÄ»½ØÍ¼£¬»ñÈ¡ÆÁÄ»½ØÍ¼ÖÐµÄºá×Ý×ø±êÏß£¬»ñÈ¡ÆÁÄ»½ØÍ¼ÖÐµÄ·ÖÊ±Í¼×ßÊÆ£¬¸ù¾Ý·ÖÊ±Í¼×ßÊÆÖÐµÄÄ©¶ËÎ»ÖÃÓëºá×ø±ê¶Ô±ÈÅÐ¶Ïµ±Ç°Ê±µã£¬¸ù¾Ý·ÖÊ±Í¼×ßÊÆÖÐµÄÄ©¶ËÎ»ÖÃÓë×Ý×ø±ê¶Ô±ÈÅÐ¶Ïµ±Ç°¼Û¸ñ£¬½«µ±Ç°Ê±µãÓëµ±Ç°¼Û¸ñÓëÖ÷Õ¾µÄÊ±¼ä¼°¼Û¸ñ½øÐÐ±È¶Ô²âÊÔ¡£ÉÏÊö¼¼Êõ·½°¸Í¨¹ý×Ô¶¯Ê¶±ðÉè±¸±¾µØµÄ½ðÈÚ×ÊÑ¶Èí¼þµÄÄÚÈÝµÄÊ¶±ð·ÖÎ…	Êý¾Ý·ÖÎö
´óÊý¾Ý²úÆ·µÄÒì³£ÌáÊ¾·½·¨¡¢×°ÖÃ¡¢ÏµÍ³¡¢Éè±¸¼°½éÖÊ	ÉîÛÚÇ°º£Î¢ÖÚÒøÐÐ¹É·ÝÓÐÏÞ¹«Ë¾	2019-07-19	2019-10-18	CN110347560A	Ö÷·ÖÀàºÅ£ºG06F11/30(20060101)	ÔÚÉó-¹«¿ª	518000 ¹ã¶«Ê¡ÉîÛÚÊÐÇ°º£Éî¸ÛºÏ×÷ÇøÇ°ÍåÒ»Â·1ºÅA¶°201ÊÒ(Èë×¤ÉîÛÚÊÐÇ°º£ÉÌÎñÃØÊéÓÐÏÞ¹«Ë¾)	±¾·¢Ã÷Éæ¼°½ðÈÚ¿Æ¼¼(Fintech)µÄ´óÊý¾Ý¼¼ÊõÁìÓò£¬±¾·¢Ã÷¹«¿ªÁËÒ»ÖÖ´óÊý¾Ý²úÆ·µÄÒì³£ÌáÊ¾·½·¨£¬°üÀ¨£ºÔÚ¼ì²âµ½´óÊý¾Ý²úÆ·³öÏÖÒì³£Ê±£¬»ñÈ¡Òì³£¶ÔÓ¦µÄ´íÎóÐÅÏ¢£»µ÷ÓÃ´íÎóÂë¿Í»§¶ËSDK£¬Í¨¹ý´íÎóÂë¿Í»§¶ËSDKÏò´íÎóÂë·þÎñÆ÷ÇëÇó´óÊý¾Ý²úÆ·¶ÔÓ¦µÄÒì³£Óë´íÎóÂëÓ³Éä¹ØÏµ±í£»ÔÚÒì³£Óë´íÎóÂëÓ³Éä¹ØÏµ±íÇëÇó³É¹¦Ê±£¬Í¨¹ý´íÎóÂë¿Í»§¶ËSDK¸ù¾ÝÒì³£Óë´íÎóÂëÓ³Éä¹ØÏµ±íÊµÀý»¯³ö´íÎóÂë´¦ÀíÆ÷£»Í¨¹ý´íÎóÂë´¦ÀíÆ÷´¦Àí´íÎóÐÅÏ¢£¬µÃµ½Óë´íÎóÐÅÏ¢Æ¥ÅäµÄ´…	Êý¾Ý·ÖÎö
ÓÃÓÚÒøÐÐÏµÍ³µÄÔËÎ¬·½·¨¡¢×°ÖÃ¡¢µç×ÓÉè±¸ÒÔ¼°½éÖÊ	ÖÐ¹ú¹¤ÉÌÒøÐÐ¹É·ÝÓÐÏÞ¹«Ë¾	2019-07-30	2019-11-08	CN110427304A	Ö÷·ÖÀàºÅ£ºG06F11/30(20060101)	ÔÚÉó-¹«¿ª	100140 ±±¾©ÊÐÎ÷³ÇÇø¸´ÐËÃÅÄÚ´ó½Ö55ºÅ	±¾¹«¿ªÌá¹©ÁËÒ»ÖÖÓÃÓÚÒøÐÐÏµÍ³µÄÔËÎ¬·½·¨£¬°üÀ¨Í¨¹ýÀ¹½ØÒµÎñ½Ó¿ÚµÄµ÷ÓÃÇëÇó£¬»ñµÃ½»Ò×Ö´ÐÐ¹ý³ÌÊý¾Ý£¬½»Ò×Ö´ÐÐ¹ý³ÌÊý¾Ý°üÀ¨ÒµÎñ½Ó¿ÚµÄÌØÕ÷ÐÅÏ¢ÒÔ¼°±¾´Îµ÷ÓÃµÄÖ´ÐÐÊ±¼äºÍµ÷ÓÃ½á¹û£¬½«½»Ò×Ö´ÐÐ¹ý³ÌÊý¾Ý´æ´¢µ½Êý¾Ý¿âÖÐ£¬»ùÓÚÊý¾Ý¿âÖÐµÄ½»Ò×Ö´ÐÐ¹ý³ÌÊý¾Ý£¬È·¶¨¶à¸öÒµÎñ½Ó¿ÚÖÐÊÇ·ñ´æÔÚ·¢ÉúÒì³£µÄÒì³£ÒµÎñ½Ó¿Ú£¬ÒÔ¼°Èô´æÔÚÒì³£ÒµÎñ½Ó¿Ú£¬½ûÓÃÒì³£ÒµÎñ½Ó¿Ú¡£±¾¹«¿ª»¹Ìá¹©ÁËÒ»ÖÖÓÃÓÚÒøÐÐÏµÍ³µÄÔËÎ¬×°ÖÃ¡¢Ò»ÖÖµç×ÓÉè±¸ÒÔ¼°Ò»ÖÖ¼ÆËã»ú¿É¶Á´æ´…	Êý¾Ý·ÖÎö
Ò»ÖÖ»ùÓÚÖ§¸¶Òì³£µÄÁªµ÷²âÊÔ·½·¨¼°×°ÖÃ	ÉîÛÚÊÐÌÚÑ¶¼ÆËã»úÏµÍ³ÓÐÏÞ¹«Ë¾	2019-08-08	2019-11-15	CN110457221A	Ö÷·ÖÀàºÅ£ºG06F11/36(20060101)	ÔÚÉó-¹«¿ª	518000¹ã¶«Ê¡ÉîÛÚÊÐÄÏÉ½Çø¸ßÐÂÇø¸ßÐÂÄÏÒ»Â··ÉÑÇ´ï´óÏÃ5-10Â¥	±¾·¢Ã÷ÊµÊ©Àý¹«¿ªÁËÒ»ÖÖ»ùÓÚÖ§¸¶Òì³£µÄÁªµ÷²âÊÔ·½·¨¼°×°ÖÃ£¬°üÀ¨£º½ÓÊÕµÚÒ»³õÊ¼Ö§¸¶²âÊÔÇëÇó£¬²¢¶ÔËùÊöµÚÒ»³õÊ¼Ö§¸¶²âÊÔÇëÇó½øÐÐ´¦ÀíµÃµ½µÚÒ»Ö§¸¶²âÊÔÇëÇó£»»ñÈ¡ËùÊöµÚÒ»Ö§¸¶²âÊÔÇëÇóÐ¯´øµÄ±êÊ¶£¬²¢»ñÈ¡ÓëËùÊö±êÊ¶¶ÔÓ¦µÄµÚÒ»Ö§¸¶Òì³££»»ñÈ¡ÓëµÚÒ»³õÊ¼Ö§¸¶²âÊÔÇëÇó¶ÔÓ¦µÄµÚÒ»ÏìÓ¦£¬²¢¶ÔµÚÒ»ÏìÓ¦½øÐÐÐÞ¸ÄÒÔµÃµ½ÓëµÚÒ»Ö§¸¶Òì³£¶ÔÓ¦µÄµÚÒ»Ö§¸¶Òì³£ÐÅÏ¢£»¶ÔµÚÒ»Ö§¸¶Òì³£ÐÅÏ¢½øÐÐ²âÊÔ²¢·µ»Ø²âÊÔËùµÃµÄ½á¹û¡£Í¨¹ý»ñÈ¡ÓëÉÏÊö±êÊ¶¶ÔÓ¦µÄÖ§¸…	Ö§¸¶
IOSÏµÍ³µÄÓ¦ÓÃ²âÊÔ·½·¨¡¢×°ÖÃ¡¢·þÎñÆ÷ºÍ´æ´¢½éÖÊ	ÉîÛÚÀÖÐÅÈí¼þ¼¼ÊõÓÐÏÞ¹«Ë¾	2019-08-15	2019-11-22	CN110489346A	Ö÷·ÖÀàºÅ£ºG06F11/36(20060101)	ÔÚÉó-¹«¿ª	518000 ¹ã¶«Ê¡ÉîÛÚÊÐÄÏÉ½ÇøÔÁº£½ÖµÀ¿ÆÔ·ÄÏÂ·3099ºÅÖÐ¹ú´¢ÄÜ´óÏÃµÚ24²ã	±¾·¢Ã÷¹«¿ªÁËÒ»ÖÖIOSÏµÍ³µÄÓ¦ÓÃ²âÊÔ·½·¨£¬°üÀ¨£ºIOS¿Í»§¶ËÅÐ¶ÏÐèÒª²âÊÔµÄÇëÇóµÄÀà±ð£»ÈôËùÊöÇëÇóÎªÖ§¸¶ÀàÇëÇó£¬ÔòÑ¡ÓÃÎ´ÆôÓÃ´úÀí·þÎñµÄµÚÒ»ÍøÂçÁ¬½Ó·¢ËÍËùÊöÖ§¸¶ÀàÇëÇó£»ÈôËùÊöÇëÇóÎª·ÇÖ§¸¶ÀàÇëÇó£¬ÔòÑ¡ÓÃÆôÓÃ´úÀí·þÎñµÄµÚ¶þÍøÂçÁ¬½Ó·¢ËÍËùÊö·ÇÖ§¸¶ÀàÇëÇó¡£Í¬Ê±»¹Ìá¹©ÁËÒ»ÖÖIOSÏµÍ³µÄÓ¦ÓÃ²âÊÔµÄ×°ÖÃ¡¢·þÎñÆ÷ºÍ´æ´¢½éÖÊ¡£±¾·¢Ã÷Í¨¹ýÅÐ¶ÏÇëÇóÖÐÊÇ·ñ°üº¬Ö§¸¶ÀàÇëÇó£¬¶ÔÖ§¸¶ÀàÇëÇó·¢ËÍÖÁCDN·þÎñÆ÷½øÐÐ·¢ËÍ£¬ÒÔÈÆ¹ý´úÀí·þÎñÆ÷£¬·ÀÖ¹Òò´…	Ö§¸¶
Ò»ÖÖ´¦ÀíÅúÁ¿ÈÎÎñµÄ·½·¨¡¢×°ÖÃ¡¢¼ÆËãÉè±¸¼°´æ´¢½éÖÊ	ÉîÛÚÇ°º£Î¢ÖÚÒøÐÐ¹É·ÝÓÐÏÞ¹«Ë¾	2019-08-21	2019-11-15	CN110457159A	Ö÷·ÖÀàºÅ£ºG06F11/07(20060101)	ÔÚÉó-¹«¿ª	518027¹ã¶«Ê¡ÉîÛÚÊÐÇ°º£Éî¸ÛºÏ×÷ÇøÇ°ÍåÒ»Â·1ºÅA¶°201ÊÒ	±¾ÉêÇë¹«¿ªÁËÒ»ÖÖ´¦ÀíÅúÁ¿ÈÎÎñµÄ·½·¨¡¢×°ÖÃ¡¢¼ÆËãÉè±¸¼°´æ´¢½éÖÊ£¬ÊôÓÚ½ðÈÚ¿Æ¼¼¼¼ÊõÁìÓò£¬ÓÃÓÚ¶ÔÅúÁ¿ÈÎÎñµÄÒì³£½øÐÐÓÐÐ§¼à¿Ø¡£ËùÊö·½·¨°üÀ¨£ºÔÚÅúÁ¿ÈÎÎñÂú×ãÅúÁ¿´¦Àí´¥·¢Ìõ¼þÊ±£¬È·¶¨ÅúÁ¿ÈÎÎñµÄÊµ¼ÊÊý¾ÝÁ¿£»¸ù¾ÝÅúÁ¿ÈÎÎñ¶ÔÓ¦µÄÀúÊ·ÅúÁ¿´¦ÀíÊý¾Ý£¬È·¶¨¶ÔÅúÁ¿ÈÎÎñ½øÐÐÅúÁ¿´¦ÀíµÄÊý¾ÝÁ¿²Î¿¼·¶Î§£»ÈôÊµ¼ÊÊý¾ÝÁ¿Î´ÔÚÊý¾ÝÁ¿²Î¿¼·¶Î§Ö®ÄÚ£¬Ôò×è¶Ï¶ÔÓÚÅúÁ¿ÈÎÎñµÄ±¾´ÎÅúÁ¿´¦Àí£»ÈôÊµ¼ÊÊý¾ÝÁ¿ÔÚÊý¾ÝÁ¿²Î¿¼·¶Î§Ö®ÄÚ£¬Ôò¸ù¾ÝÊµ¼ÊÊý¾ÝÁ¿¶ÔÄ¿±êÅ…	Êý¾Ý·ÖÎö
µ²°åÉú³É·½·¨¡¢×°ÖÃ¡¢Éè±¸¼°¼ÆËã»ú´æ´¢½éÖÊ	ÉîÛÚÇ°º£Î¢ÖÚÒøÐÐ¹É·ÝÓÐÏÞ¹«Ë¾	2019-09-05	2019-12-13	CN110569159A	Ö÷·ÖÀàºÅ£ºG06F11/22(20060101)	ÔÚÉó-¹«¿ª	518000 ¹ã¶«Ê¡ÉîÛÚÊÐÇ°º£Éî¸ÛºÏ×÷ÇøÇ°ÍåÒ»Â·1ºÅA¶°201ÊÒ(Èë×¤ÉîÛÚÊÐÇ°º£ÉÌÎñÃØÊéÓÐÏÞ¹«Ë¾)	±¾·¢Ã÷Éæ¼°½ðÈÚ¿Æ¼¼(Fintech)¼¼ÊõÁìÓò£¬²¢¹«¿ªÁËÒ»ÖÖµ²°åÉú³É·½·¨£¬¸Ã·½·¨°üÀ¨£º»ñÈ¡ÖÕ¶ËµÄ±ê×¼½Ó¿ÚÎÄµµ£¬²¢Í¨¹ý¹æÔòÒýÇæ¶ÔËùÊö±ê×¼½Ó¿ÚÎÄµµÖÐµÄÇëÇó²ÎÊýºÍ·µ»Ø²ÎÊý·Ö±ð½øÐÐ¹æÔòÅäÖÃ£»Í¨¹ýËùÊö¹æÔòÒýÇæ¶ÔÒÑ½øÐÐ¹æÔòÅäÖÃµÄËùÊöÇëÇó²ÎÊý½øÐÐ½âÎö£¬ÒÔ»ñÈ¡ËùÊöÇëÇó²ÎÊý¶ÔÓ¦µÄÄ¿±êmock´úÂë£¬²¢Í¨¹ýËùÊö¹æÔòÒýÇæ¶ÔÒÑ½øÐÐ¹æÔòÅäÖÃµÄËùÊö·µ»Ø²ÎÊý½øÐÐ½âÎö£¬ÒÔ»ñÈ¡ËùÊö·µ»Ø²ÎÊý¶ÔÓ¦µÄÄ£Äâmock´úÂë£»»ùÓÚËùÊöÄ¿±êmock´úÂëºÍËùÊöÄ£Äâmock´úÂë…	Êý¾Ý·ÖÎö
Òì³£ÈÎÎñ¼ì²â·½·¨¡¢×°ÖÃ¡¢Éè±¸¼°¼ÆËã»ú´æ´¢½éÖÊ	ÉîÛÚÇ°º£Î¢ÖÚÒøÐÐ¹É·ÝÓÐÏÞ¹«Ë¾	2019-09-11	2019-12-06	CN110543356A	Ö÷·ÖÀàºÅ£ºG06F9/48(20060101)	ÔÚÉó-¹«¿ª	518000 ¹ã¶«Ê¡ÉîÛÚÊÐÇ°º£Éî¸ÛºÏ×÷ÇøÇ°ÍåÒ»Â·1ºÅA¶°201ÊÒ(Èë×¤ÉîÛÚÊÐÇ°º£ÉÌÎñÃØÊéÓÐÏÞ¹«Ë¾)	±¾·¢Ã÷Éæ¼°½ðÈÚ¿Æ¼¼(Fintech)¼¼ÊõÁìÓò£¬²¢¹«¿ªÁËÒ»ÖÖÒì³£ÈÎÎñ¼ì²â·½·¨£¬¸Ã·½·¨°üÀ¨£º¶Ôµ÷¶ÈÆ½Ì¨ÖÐµÄ¶à¸öÈÎÎñ½øÐÐ·ÖÎö£¬ÒÔÈ·¶¨¸÷ËùÊöÈÎÎñ·Ö±ðÓëËùÊöµ÷¶ÈÆ½Ì¨ÖÐ¶à¸ö±íÖ®¼äµÄ¹ØÁª¹ØÏµ£»»ùÓÚ¸÷ËùÊö¹ØÁª¹ØÏµÈ·¶¨¸÷ËùÊöÈÎÎñÖ®¼äµÄÒÀÀµ¹ØÏµ£¬²¢»ùÓÚ¸÷ËùÊöÒÀÀµ¹ØÏµ¶Ô¸÷ËùÊöÈÎÎñ½øÐÐ¼ì²â£¬ÒÔÈ·¶¨ÔÚ¸÷ËùÊöÈÎÎñÖÐÊÇ·ñ´æÔÚ¾ßÓÐÒì³£µÄÈÎÎñ£»Èô´æÔÚ£¬Ôò½«¾ßÓÐÒì³£µÄËùÊöÈÎÎñ×÷ÎªÒì³£ÈÎÎñ¡£±¾·¢Ã÷»¹¹«¿ªÁËÒ»ÖÖÒì³£ÈÎÎñ¼ì²â×°ÖÃ¡¢Éè±¸ºÍÒ»ÖÖ¼ÆËã»ú…	Êý¾Ý·ÖÎö
Ò»ÖÖ½ðÈÚÐÅÏ¢Í³¼Æ¹ÜÀíÏµÍ³	¹Ë²©º½	2019-09-17	2020-01-03	CN110647558A	Ö÷·ÖÀàºÅ£ºG06F16/2458(20190101)	ÔÚÉó-¹«¿ª	510535 ¹ã¶«Ê¡¹ãÖÝÊÐ»ÆÆÒÇø¿ªÌ©´óµÀ36ºÅ	±¾·¢Ã÷Éæ¼°½ðÈÚÐÅÏ¢¹ÜÀí¼¼ÊõÁìÓò£¬ÓÈÆäÉæ¼°Ò»ÖÖ½ðÈÚÐÅÏ¢Í³¼Æ¹ÜÀíÏµÍ³£¬°üÀ¨Êý¾Ý²É¼¯Ä£¿é£¬ÓÃÓÚ²É¼¯¸÷Ïî½ðÈÚÐÅÏ¢Êý¾ÝÐÅÏ¢£¬´«ÊäÄ£¿é£¬ÎªÉÏÊöÊý¾Ý²É¼¯Ä£¿éµÃµ½µÄ½ðÈÚÊý¾ÝÐÅÏ¢Ìá¹©´«ÊäÆ½Ì¨½éÖÊ£¬Êý¾Ý´æ´¢Ä£¿é£¬ÓÃÓÚ´æ´¢½ÓÊÕÉÏÊö´«ÊäÄ£¿é´«Êä³öµÄ¸÷Ïî½ðÈÚÐÅÏ¢£¬Êý¾Ý·ÖÎöÄ£¿é£¬¶ÔÉÏÊöÊý¾Ý´æ´¢Ä£¿éµÄÊý¾Ý½øÐÐ½ÓÊÕ£¬²¢¶ÔµÃµ½µÄ½ðÈÚÐÅÏ¢Êý¾Ý½øÐÐ·ÖÎö£¬µÃµ½¸÷ÏîÊý¾Ý£¬±¾·¢Ã÷Í¨¹ýÐéÄâ´«Êäµ¥Ôª¼°ÎïÀí´«Êäµ¥Ôª£¬¿É¿¿µÄ½øÐÐ½ðÈÚÊý¾ÝµÄ´«Êä£¬ÇÒÉ…	°²È«
ÒµÎñÒì³£ÅÅ²é·½·¨¡¢×°ÖÃ¡¢Éè±¸¼°¼ÆËã»ú¿É¶Á´æ´¢½éÖÊ	ÉîÛÚÇ°º£Î¢ÖÚÒøÐÐ¹É·ÝÓÐÏÞ¹«Ë¾	2019-09-18	2019-12-20	CN110597651A	Ö÷·ÖÀàºÅ£ºG06F11/07(20060101)	ÔÚÉó-¹«¿ª	518000 ¹ã¶«Ê¡ÉîÛÚÊÐÇ°º£Éî¸ÛºÏ×÷ÇøÇ°ÍåÒ»Â·1ºÅA¶°201ÊÒ(Èë×¤ÉîÛÚÊÐÇ°º£ÉÌÎñÃØÊéÓÐÏÞ¹«Ë¾)	±¾·¢Ã÷Éæ¼°½ðÈÚ¿Æ¼¼(Fintech)¼¼ÊõÁìÓò£¬±¾·¢Ã÷¹«¿ªÁËÒ»ÖÖÒµÎñÒì³£ÅÅ²é·½·¨£¬¸Ã·½·¨°üÀ¨£ºÔÚ¼ì²âµ½ÒµÎñ³ÌÐòÉú²ú¸üÐÂÊ±£¬Í¨¹ýÔ¤ÉèµÄÊý¾Ý²É¼¯½Ó¿Ú²É¼¯ËùÊöÒµÎñ³ÌÐòµÄ¸üÐÂÐÅÏ¢£»Ê¶±ðËùÊö¸üÐÂÐÅÏ¢£¬µÃµ½ËùÊö¸üÐÂÐÅÏ¢¶ÔÓ¦µÄ¸üÐÂÊÂ¼þ£¬½«ËùÊö¸üÐÂÐÅÏ¢ÓëËùÊö¸üÐÂÊÂ¼þ¹ØÁª±£´æÖÁÔ¤ÉèÊ±Ðò¿â£»ÔÚ½ÓÊÕµ½ÒµÎñÒì³£ÅÅ²éÇëÇóÊ±£¬»ñÈ¡ËùÊöÒµÎñÒì³£ÅÅ²éÇëÇó¶ÔÓ¦µÄÒì³£ÐÅÏ¢£»²éÑ¯ËùÊöÔ¤ÉèÊ±Ðò¿â£¬»ñÈ¡ÓëËùÊöÒì³£ÐÅÏ¢¶ÔÓ¦µÄÄ¿±ê¸üÐÂÐÅÏ¢£¬¼°ËùÊöÄ¿±ê¸ü…	Êý¾Ý·ÖÎö
Ò»ÖÖË½ÓÐÔÆ»·¾³ÏÂµÄÒøÐÐ²ÎÊýÎÄ¼þÊµÊ±Í¬²½·½·¨¼°ÏµÍ³	ÖÐ¹úÒøÐÐ¹É·ÝÓÐÏÞ¹«Ë¾	2019-09-20	2019-12-31	CN110633257A	Ö÷·ÖÀàºÅ£ºG06F16/178(20190101)	ÔÚÉó-¹«¿ª	100818 ±±¾©ÊÐÎ÷³ÇÇø¸´ÐËÃÅÄÚ´ó½Ö1ºÅ	±¾·¢Ã÷Ìá¹©ÁËÒ»ÖÖË½ÓÐÔÆ»·¾³ÏÂµÄÒøÐÐ²ÎÊýÎÄ¼þÊµÊ±Í¬²½·½·¨¼°ÏµÍ³£¬ÆäÖÐ£¬¸Ã·½·¨°üÀ¨£º»ñÈ¡ÒøÐÐ¿Í»§¶Ë·¢ËÍµÄÒøÐÐ²ÎÊýÎÄ¼þ£»»ùÓÚÒøÐÐ²ÎÊýÎÄ¼þµÄÌØÕ÷£¬½øÐÐÊý¾ÝÄÚÈÝ¼ÆËã£¬½«ÒøÐÐ²ÎÊýÎÄ¼þ½øÐÐÇÐ·Ö£¬µÃµ½ÒøÐÐ²ÎÊýÎÄ¼þÊý¾Ý¿éÒÔ¼°¶ÔÓ¦µÄÔªÊý¾Ý£»ÌáÈ¡ÒøÐÐ²ÎÊýÎÄ¼þÊý¾Ý¿éµÄÌØÕ÷Öµ£¬ÔÚÊý¾Ý¿éÌØÕ÷Ë÷ÒýÖÐ½øÐÐ±È¶Ô£¬½«ÈßÓàµÄÒøÐÐ²ÎÊýÎÄ¼þÊý¾Ý¿é½øÐÐÉ¾³ý£¬²¢½«ÐÂÔöµÄÒøÐÐ²ÎÊýÎÄ¼þÊý¾Ý¿éÒÔ¼°ÔªÊý¾Ý´æ´¢ÖÁË½ÓÐÔÆ·þÎñÆ÷£»µ±Ë½ÓÐÔÆ·þÎñÆ÷Íê³ÉÐÂÔöµÄÒ…	Êý¾Ý·ÖÎö
Ò»ÖÖ»ùÓÚÉ³ºÐÏµÍ³µÄ²âÊÔ·½·¨¡¢×°ÖÃ¼°µç×ÓÉè±¸	±±¾©Äã²Æ¸»¼ÆËã»ú¿Æ¼¼ÓÐÏÞ¹«Ë¾	2019-09-26	2020-02-07	CN110765004A	Ö÷·ÖÀàºÅ£ºG06F11/36(20060101)	ÔÚÉó-¹«¿ª	100022 ±±¾©ÊÐ³¯ÑôÇø¶«Èý»·ÄÏÂ·102ºÅ5²ã5042	±¾·¢Ã÷¹«¿ªÁËÒ»ÖÖ»ùÓÚÉ³ºÐÏµÍ³µÄ²âÊÔ·½·¨¡¢×°ÖÃ¼°µç×ÓÉè±¸£¬ËùÊö·½·¨°üÀ¨£ºÉèÖÃ¾µÏñ·þÎñÆ÷ºÍ¾µÏñÊý¾Ý¿â£¬²¢ÔÚËùÊö¾µÏñ·þÎñÆ÷ÉÏ´´½¨É³ºÐÏµÍ³£¬ÔÚÔ¤ÉèÊ±¼äµã½«ÏßÉÏ·þÎñÆ÷µÄÏµÍ³ÎÄ¼þÍ¬²½µ½ËùÊö¾µÏñ·þÎñÆ÷ÉÏ£¬²¢Í¬²½ÏßÉÏÊý¾Ý¿âµ½ËùÊö¾µÏñÊý¾Ý¿â£»¸ù¾Ý²âÊÔÈÎÎñÐÞ¸Ä²âÊÔÕËºÅÔÚËùÊö¾µÏñÊý¾Ý¿âÖÐµÄ²âÊÔÊý¾Ý£»ÔÚËùÊöÉ³ºÐÏµÍ³ÖÐµÇÂ¼ËùÊö²âÊÔÕËºÅ½øÐÐÈ«»Ø¹é²âÊÔ£¬Éú³É²âÊÔ±¨¸æ¡£±¾·¢Ã÷µÄ»ùÓÚÉ³ºÐÏµÍ³µÄ²âÊÔ·½·¨£¬Í¨¹ýÉè¼ÆÓëÏßÉÏÊý¾Ý»·¾³ÍêÈ«Ï…	°²È«
ÓÃ»§ÐÐÎª¼ÇÂ¼Óë×·ËÝ¹ÜÀí·½·¨¡¢×°ÖÃ¡¢µç×ÓÉè±¸¼°ÏµÍ³	Ö£ÖÝ¹ìµÀ½»Í¨ÐÅÏ¢¼¼ÊõÑÐ¾¿Ôº	2019-10-18	2020-02-14	CN110795320A	Ö÷·ÖÀàºÅ£ºG06F11/34(20060101)	ÔÚÉó-¹«¿ª	450001 ºÓÄÏÊ¡Ö£ÖÝÊÐ¸ßÐÂ¼¼Êõ²úÒµ¿ª·¢Çø´äÖñ½Ö6ºÅ11ºÅÂ¥2Â¥	±¾·¢Ã÷Ìá¹©ÁËÒ»ÖÖÓÃ»§ÐÐÎª¼ÇÂ¼Óë×·ËÝ¹ÜÀí·½·¨¡¢×°ÖÃ¡¢µç×ÓÉè±¸¼°ÏµÍ³£¬µç×ÓÉè±¸·Ö±ðÓëÈË»ú½»»¥ÏµÍ³ÖÐµÄÈË»ú½»»¥ÍâÎ§Éè±¸ÒÔ¼°ÈË»ú½»»¥Ö÷»úÍ¨ÐÅÁ¬½Ó£¬ÓÃ»§ÐÐÎª¼ÇÂ¼Óë×·ËÝ¹ÜÀí·½·¨°üÀ¨£º¼ì²âÎ¨Ò»±êÊ¶ÈË»ú½»»¥ÏµÍ³µÄ²Ù×÷ÕßµÄµç×ÓÉí·Ý¿¨ÊÇ·ñ°²²åÔÚµç×ÓÉè±¸ÉÏ£»ÔÚÈ·¶¨µç×ÓÉí·Ý¿¨ÒÑ°²²åÔÚµç×ÓÉè±¸ÉÏÊ±£¬»ñÈ¡²Ù×÷ÕßµÄÉúÎïÌØÕ÷ÐÅÏ¢£»»ùÓÚ²Ù×÷ÕßµÄÉúÎïÌØÕ÷ÐÅÏ¢¶Ô²Ù×÷Õß½øÐÐÉí·ÝÑéÖ¤£¬²¢ÔÚÉí·ÝÑéÖ¤Í¨¹ýÊ±£¬´¥·¢ÈË»ú½»»¥ÍâÎ§Éè±¸ºÍÈË»ú½»»¥Ö÷»…	°²È«
ÍøÂç¹¥»÷ËÝÔ´·½·¨¼°×°ÖÃ	ÐÂ»ªÈýÐÅÏ¢°²È«¼¼ÊõÓÐÏÞ¹«Ë¾	2019-10-25	2020-02-07	CN110764969A	Ö÷·ÖÀàºÅ£ºG06F11/30(20060101)	ÔÚÉó-ÊµÖÊÉó²éµÄÉúÐ§	230001 °²»ÕÊ¡ºÏ·ÊÊÐ¸ßÐÂÇø´´ÐÂ´óµÀ2800ºÅ´´ÐÂ²úÒµÔ°¶þÆÚH2¶°541ÊÒ	±¾ÉêÇëÌá¹©Ò»ÖÖÍøÂç¹¥»÷ËÝÔ´·½·¨¼°×°ÖÃ¡£ÆäÖÐ£¬ËùÊö·½·¨°üÀ¨£¬µ±½ÓÊÕµ½ÍøÂçÖÐ°²È«Éè±¸ÉÏ±¨µÄ¹¥»÷ÊÂ¼þÊ±£¬»ñÈ¡ËùÊö°²È«Éè±¸Éú³ÉµÄÓëËùÊö¹¥»÷ÊÂ¼þ¶ÔÓ¦µÄ¹¥»÷ÈÕÖ¾£¬»ùÓÚÁ÷Ê½¼ÆËã£¬ÌáÈ¡ËùÊö¹¥»÷ÈÕÖ¾ÖÐ¹¥»÷Ô´ºÍ¹¥»÷Ä¿±êµÄÍøÂçµØÖ·ÐÅÏ¢£¬²¢´æ´¢µ½ÄÚ´æÖÐ£¬È»ºó½«ËùÊö¹¥»÷Ô´ºÍ¹¥»÷Ä¿±êµÄÍøÂçµØÖ·ÐÅÏ¢ÓëÔ¤ÏÈ½¨Á¢ÔÚÄÚ´æÖÐµÄ»ù´¡ÐÅÏ¢Êý¾Ý¿â½øÐÐÆ¥Åä£¬µÃµ½ËùÊö¹¥»÷Ô´ºÍ¹¥»÷Ä¿±êµÄÍøÂçÎ»ÖÃÐÅÏ¢¡£×îºó¸ù¾ÝËùÊö¹¥»÷Ô´ºÍ¹¥»÷Ä¿±êµÄÍøÂçÎ»ÖÃÐÅÏ¢¿ÉÒ…	°²È«
Êý×Ö»õ±Ò¿ó»ú²ÎÊýµÄµ÷Õû·½·¨¡¢×°ÖÃ¡¢Éè±¸¼°´æ´¢½éÖÊ	Õ¹Ñ¶°ëµ¼Ìå£¨³É¶¼£©ÓÐÏÞ¹«Ë¾	2019-10-25	2020-02-21	CN110825208A	Ö÷·ÖÀàºÅ£ºG06F1/3234(20190101)	ÔÚÉó-¹«¿ª	610041 ËÄ´¨Ê¡³É¶¼ÊÐ¸ßÐÂÇøÌì»ª¶þÂ·219ºÅ5¶°1µ¥Ôª3¡¢4¡¢5¡¢7²ã	±¾ÉêÇëÌá¹©Ò»ÖÖÊý×Ö»õ±Ò¿ó»ú²ÎÊýµÄµ÷Õû·½·¨¡¢×°ÖÃ¡¢Éè±¸¼°´æ´¢½éÖÊ£¬¸Ã·½·¨°üÀ¨£ºÈ·¶¨Êý×Ö»õ±Ò¿ó»úÖÐËãÁ¦µ¥ÔªµÄ¼ÆËã´íÎóÂÊ£»¸ù¾Ý¼ÆËã´íÎóÂÊ£¬µ÷ÕûËãÁ¦µ¥ÔªµÄµÚÒ»¹¤×÷µçÑ¹¡£ÓÉÓÚÍ¨¹ý¸ù¾ÝÊý×Ö»õ±Ò¿ó»úÖÐËãÁ¦µ¥ÔªµÄ¼ÆËã´íÎóÂÊ£¬¶Ô¸ÃËãÁ¦µ¥ÔªµÄ¹¤×÷µçÑ¹½øÐÐµ÷Õû£¬Ìá¸ßÁËÃ¿¸öËãÁ¦µ¥ÔªµÄÄÜÐ§±È£¬½ø¶øÌá¸ßÁËÊý×Ö»õ±Ò¿ó»úµÄÄÜÐ§±È¡£	°²È«
²ÎÊýÖÊÁ¿Ð£Ñé·½·¨¡¢×°ÖÃ¡¢Éè±¸¼°¼ÆËã»ú¿É¶Á´æ´¢½éÖÊ	ÉîÛÚÇ°º£Î¢ÖÚÒøÐÐ¹É·ÝÓÐÏÞ¹«Ë¾	2019-11-04	2020-02-21	CN110825634A	Ö÷·ÖÀàºÅ£ºG06F11/36(20060101)	ÔÚÉó-¹«¿ª	518000 ¹ã¶«Ê¡ÉîÛÚÊÐÇ°º£Éî¸ÛºÏ×÷ÇøÇ°ÍåÒ»Â·1ºÅA¶°201ÊÒ(Èë×¤ÉîÛÚÊÐÇ°º£ÉÌÎñÃØÊéÓÐÏÞ¹«Ë¾)	±¾·¢Ã÷Éæ¼°½ðÈÚ¿Æ¼¼(Fintech)¼¼ÊõÁìÓò£¬±¾·¢Ã÷¹«¿ªÁËÒ»ÖÖ²ÎÊýÖÊÁ¿Ð£Ñé·½·¨£¬¸Ã·½·¨°üÀ¨£ºÔÚ½ÓÊÕµ½²ÎÊýÐ£ÑéÇëÇóÊ±£¬»ñÈ¡Ô¤ÉèÄ£°å¿âÖÐËùÊö²ÎÊýÐ£ÑéÇëÇó¶ÔÓ¦µÄÐ£ÑéÄ£°å£»»ñÈ¡ËùÊöÐ£ÑéÄ£°å¶ÔÓ¦µÄ²ÎÊýÐÅÏ¢£¬½«ËùÊö²ÎÊýÐÅÏ¢ÖÐµÄ²ÎÊýÌí¼Óµ½ËùÊöÐ£ÑéÄ£°åÖÐ£¬Éú³ÉÐ£Ñé¹æÔò£»ÔËÐÐËùÊöÐ£Ñé¹æÔò£¬¶ÔËùÊöÐ£ÑéÄ£°åÖÐµÄ²ÎÊý½øÐÐÐ£Ñé£¬Êä³ö²ÎÊýÖÊÁ¿Ð£Ñé½á¹û¡£±¾·¢Ã÷»¹¹«¿ªÁËÒ»ÖÖ²ÎÊýÖÊÁ¿Ð£Ñé×°ÖÃ¡¢Éè±¸¼°¼ÆËã»ú¿É¶Á´æ´¢½éÖÊ¡£±¾·¢Ã÷Ìá¸ßÁË²ÎÊýÖÊÁ¿…	Êý¾Ý·ÖÎö
ÒøÐÐ¿¨ÍøÂç½»Ò×µÄ²âÊÔ·½·¨¼°×°ÖÃ	ÖÐ¹úÒøÐÐ¹É·ÝÓÐÏÞ¹«Ë¾	2019-11-06	2020-02-25	CN110837470A	Ö÷·ÖÀàºÅ£ºG06F11/36(20060101)	ÔÚÉó-¹«¿ª	100818 ±±¾©ÊÐÎ÷³ÇÇø¸´ÐËÃÅÄÚ´ó½Ö1ºÅ	±¾·¢Ã÷¹«¿ªÁËÒ»ÖÖÒøÐÐ¿¨ÍøÂç½»Ò×µÄ²âÊÔ·½·¨¼°×°ÖÃ£¬ÄÜ¹»Ä£ÄâÊÕµ¥·½ºÍ·¢¿¨·½£¬»¹ÄÜ¹»Í¨¹ýÅäÖÃÄ£ÄâÄ¿±ê¿¨×éÖ¯µÄ¿¨ÏµÍ³£¬²¢Í¨¹ýÄ£ÄâµÄ¿¨ÏµÍ³ÒÔ¼°Ä£ÄâÊÕµ¥·½»òÄ£Äâ·¢¿¨·½£¬¶Ô½«ÒªÊµ¼Ê½ÓÈëÄ¿±ê¿¨×éÖ¯µÄ¿¨ÏµÍ³µÄ´ý²âÊÔµ¥Ôª½øÐÐÒøÐÐ¿¨ÍøÂç½»Ò×²âÊÔºÍµ÷ÊÔ£¬²âÊÔºÏ¸ñµÄÒøÐÐ¿¨ÍøÂç½»Ò×²âÊÔµÄ´ý²âÊÔµ¥Ôª£¬¿ÉÒÔ´ó·ùÌá¸ß½ÓÈëÄ¿±ê¿¨×éÖ¯µÄ¿¨ÏµÍ³Ê±£¬½øÐÐÓÃ»§ÑéÊÕ²âÊÔµÄ³É¹¦ÂÊºÍ²âÊÔÐ§ÂÊ£¬´ó·ù¼õÉÙÁËÊµ¼Ê½øÐÐÓÃ»§ÑéÊÕ²âÊÔÊ±µÄÈËÁ¦ºÍ²ÆÁ¦»¨·Ñ¡£	°²È«
Ò»ÖÖÊÖ»úÒøÐÐµÄÒ³ÃæÕ¹Ê¾²âÊÔ·½·¨¼°×°ÖÃ	ÖÐ¹úÒøÐÐ¹É·ÝÓÐÏÞ¹«Ë¾	2019-11-25	2020-04-10	CN110990275A	Ö÷·ÖÀàºÅ£ºG06F11/36(20060101)	ÔÚÉó-¹«¿ª	100818 ±±¾©ÊÐÎ÷³ÇÇø¸´ÐËÃÅÄÚ´ó½Ö1ºÅ	±¾ÉêÇëÌá¹©ÁËÒ»ÖÖÊÖ»úÒøÐÐµÄÒ³ÃæÕ¹Ê¾²âÊÔ·½·¨¼°×°ÖÃ£¬Ó¦ÓÃÓÚ¶ÀÁ¢ÓÚÊÖ»úÒøÐÐ·þÎñÆ÷µÄµÚÈý·½ÉÌ»§²âÊÔ¹¤¾ß£¬ÔÚ±¾ÉêÇëÖÐ£¬»ùÓÚ¶ÀÁ¢ÓÚÊÖ»úÒøÐÐ·þÎñÆ÷µÄµÚÈý·½ÉÌ»§²âÊÔ¹¤¾ß£¬½«ÊÖ»úÒøÐÐµÄµÚÈý·½ÉÌ»§webÒ³ÃæµÄÕ¹Ê¾²âÊÔÁ÷³Ì²¿ÊðÔÚµÚÈý·½ÉÌ»§²âÊÔ¹¤¾ßÖÐ£¬Ê¹ÊÖ»úÒøÐÐ·þÎñÆ÷½öÐèÒªÓëµÚÈý·½ÉÌ»§²âÊÔ¹¤¾ß½øÐÐÊý¾Ý½»»¥£¬¼õÉÙÁËÊÖ»úÒøÐÐ·þÎñÆ÷µÄ×ÊÔ´Õ¼ÓÃ£¬´Ó¶ø¿ÉÒÔ½µµÍÊÖ»úÒøÐÐ·þÎñÆ÷µÄ¸ºµ£¡£²¢ÇÒ£¬ÔÚ¶Ô·þÎñµ÷ÓÃÊý¾ÝÐ£ÑéÍ¨¹ýºó·¢ËÍÖÁÊÖ»úÒøÐÐ·þÎñ…	°²È«
Éç±£½É·ÑÄ£Äâ·½·¨¼°×°ÖÃ	ÖÐ¹úÒøÐÐ¹É·ÝÓÐÏÞ¹«Ë¾	2019-11-27	2020-03-31	CN110941557A	Ö÷·ÖÀàºÅ£ºG06F11/36(20060101)	ÔÚÉó-¹«¿ª	100818 ±±¾©ÊÐÎ÷³ÇÇø¸´ÐËÃÅÄÚ´ó½Ö1ºÅ	±¾·¢Ã÷Éæ¼°¼ÆËã»ú¼¼ÊõÁìÓò£¬ÌØ±ðÊÇÉæ¼°Ò»ÖÖÉç±£½É·ÑÄ£Äâ·½·¨¼°×°ÖÃ¡£¸Ã·½·¨°üÀ¨£ºµ±½ÓÊÕµ½ÒøÐÐÈí¼þ·¢ËÍµÄÇëÇó±¨ÎÄÊ±£¬»ñÈ¡·þÎñÆ÷ÖÐµÄ¸÷¸öÆÌµ×Êý¾Ý£»ÔÚ¸÷¸öÆÌµ×Êý¾ÝÖÐ²éÕÒÇëÇó±¨ÎÄ¶ÔÓ¦µÄÄ¿±êÆÌµ×Êý¾Ý£¬²¢ÒÀ¾ÝÄ¿±êÆÌµ×Êý¾ÝÅÐ¶ÏÓÃ»§ÊÇ·ñ´æÔÚ´ý½É·ÑÉç±£ÏîÄ¿£»Èô´æÔÚ£¬ÔòÉú³É½É·Ñ±¨ÎÄ£¬¾­ÓÉÒøÐÐÈí¼þÏòÓÃ»§·¢ËÍ½É·Ñ±¨ÎÄ£»µ±½ÓÊÕµ½ÒøÐÐÈí¼þ·¢ËÍµÄ½É·Ñ±¨ÎÄ¶ÔÓ¦µÄ½É·ÑÐÅÏ¢Ê±£¬ÅÐ¶ÏÓÃ»§ÊÇ·ñ½É·Ñ³É¹¦£»ÈôÓÃ»§½É·Ñ³É¹¦£¬ÔòÉú³É»ØÖ´±¨ÎÄ£¬²¢ÏòÒ…	±£ÏÕ
Ò»ÖÖÒÆ¶¯Ö§¸¶²âÊÔ·½·¨¡¢×°ÖÃÒÔ¼°ÏµÍ³	ÖÐ¹úÒøÐÐ¹É·ÝÓÐÏÞ¹«Ë¾	2019-11-28	2020-04-10	CN110990272A	Ö÷·ÖÀàºÅ£ºG06F11/36(20060101)	ÔÚÉó-¹«¿ª	100818 ±±¾©ÊÐÎ÷³ÇÇø¸´ÐËÃÅÄÚ´ó½Ö1ºÅ	±¾·¢Ã÷Ìá¹©ÁËÒ»ÖÖÒÆ¶¯Ö§¸¶²âÊÔ·½·¨¡¢×°ÖÃÒÔ¼°ÏµÍ³£¬Í¨¹ý½ÓÊÕÒÆ¶¯Ö§¸¶ÖÕ¶Ë·¢ËÍµÄÖ§¸¶ÇëÇóÐÅÏ¢£»¶ÔÖ§¸¶ÇëÇóÐÅÏ¢½øÐÐ½âÎö£¬»ñÈ¡Ö§¸¶ÇëÇóÐÅÏ¢ÖÐµÄÄ¿±êÊÕ¿î·½±êÊ¶ÒÔ¼°Ä¿±ê¸¶¿î·½±êÊ¶£»È·¶¨´æ´¢ÔÚÒÆ¶¯Ö§¸¶²âÊÔÏµÍ³ÄÚÓëÄ¿±êÊÕ¿î·½±êÊ¶¶ÔÓ¦µÄÊÕ¿î·½Ä£ÄâÕË»§£»ÒÀ¾ÝÄ¿±ê¸¶¿î·½±êÊ¶ÒÔ¼°ÊÕ¿î·½Ä£ÄâÕË»§£¬Íê³ÉÄ£ÄâÖ§¸¶²Ù×÷£¬²¢ÏòÒÆ¶¯Ö§¸¶ÖÕ¶Ë·µ»ØÄ£ÄâÖ§¸¶²Ù×÷½á¹û£»ÒÀ¾ÝÄ£ÄâÖ§¸¶²Ù×÷½á¹û£¬µÃµ½ÒÆ¶¯Ö§¸¶²âÊÔ½á¹û¡£½«Ä£ÄâÕË»§Ô¤ÏÈ´æ´¢ÔÚÒÆ¶¯Ö§¸¶²…	Ö§¸¶
Ò»ÖÖ¿ÉÅäÖÃ»¯µÄÍ³Ò»¹ÜÀíÆ½Ì¨¼°·½·¨	±±¾©î£ÖÇÈÚ¿Æ¿Ø¹É¹É·ÝÓÐÏÞ¹«Ë¾	2019-11-28	2020-05-12	CN111145030A	Ö÷·ÖÀàºÅ£ºG06Q40/06(20120101)	ÔÚÉó-¹«¿ª	100086 ±±¾©ÊÐº£µíÇø±±Èý»·Î÷Â·99ºÅÔº3ºÅÂ¥4²ã510	±¾·¢Ã÷¹«¿ªÁËÒ»ÖÖ¿ÉÅäÖÃ»¯µÄÍ³Ò»¹ÜÀíÆ½Ì¨¼°·½·¨£¬°üÀ¨£ºS1£¬»ù½ð³ÉÁ¢£¬ÓÃ»§ÔÚÏµÍ³ÖÐÎ¬»¤»ù½ð»ù´¡ÐÅÏ¢¡¢ºÏÍ¬ÐÅÏ¢¡¢×Ê½ðÕËºÅÐÅÏ¢£»S2£¬»ù½ðÏúÊÛ£¬¶Ô½Ó»ù½ðÏúÊÛÏµÍ³£¬»ñÈ¡µ±ÈÕ»ù½ðÏúÊÛÊý¾Ý£¬¸ù¾ÝÏúÊÛÊý¾Ý¼ÆËãÏà¹ØÍ¶×ÊÕß³ÖÓÐ·Ý¶îºÍ»ù½ðÒµ¼¨±¨³ê£»S3£¬Êý¾Ý¹é¼¯£¬¸ù¾ÝS1ÖÐÌá¹©µÄ»ù±¾ÐÅÏ¢£¬¶Ô½Ó²»Í¬È¯ÉÌÍ¨µÀµÄPBÏµÍ³£¬»ñÈ¡²úÆ·Ïà¹ØµÄ×Ê½ðÊý¾Ý¡¢½»Ò×Êý¾Ý¡¢³Ö²ÖÊý¾Ý£»S4£¬¼¯ÖÐ½»Ò×£¬¸ù¾ÝS3ÖÐ»ñÈ¡µÄ»ù½ð×Ê½ðÍ·´çÐÅÏ¢£¬ÔÚÏµÍ³ÖÐ½øÐÐ¼¯ÖÐÏÂµ¥£…	Êý¾Ý·ÖÎö
Ò»ÖÖ»ùÓÚWebSocketµÄ¿çä¯ÀÀÆ÷½ðÈÚ×ÔÖúÖÕ¶ËÓ²¼þµ÷ÓÃ·½·¨	ÀË³±½ðÈÚÐÅÏ¢¼¼ÊõÓÐÏÞ¹«Ë¾	2019-12-03	2020-04-21	CN111045878A	Ö÷·ÖÀàºÅ£ºG06F11/22(20060101)	ÔÚÉó-¹«¿ª	215100 ½­ËÕÊ¡ËÕÖÝÊÐÎâÖÐ¿ª·¢ÇøÎâäÁ½­¹¤ÒµÔ°ÎâäÁÂ·818ºÅ	±¾·¢Ã÷¹«¿ªÁËÒ»ÖÖ»ùÓÚWebSocketµÄ¿çä¯ÀÀÆ÷½ðÈÚ×ÔÖúÖÕ¶ËÓ²¼þµ÷ÓÃ·½·¨£¬°üÀ¨WebSocket¿Í»§¶Ë¡¢WebSocket·þÎñ¶Ë¡¢ºÍÓ²¼þÇý¶¯£»ËùÊöWebSocket¿Í»§¶ËÊ¹ÓÃJavascriptºÍWebSocket¼¼Êõ·â×°Ó²¼þÖ¸Áî£¬Á¬½ÓºÍ·¢ËÍÓ²¼þÖ¸ÁîÏÂ·¢±¨ÎÄµ½WebSocket·þÎñ¶Ë£»ËùÊöWebSocket·þÎñ¶ËÓÃÓÚÆô¶¯WebSocket·þÎñ£¬²¢¸ù¾ÝÓ²¼þÖ¸ÁîÊµÏÖ¶ÔÓ²¼þÇý¶¯µÄµ÷ÓÃ·â×°£¬½«Ó²¼þÖ´ÐÐ½á¹ûºÍÓ²¼þÊÂ¼þ±¨ÎÄ·µ»Ø¸øWebSocket¿Í»§¶Ë£»±¾·¢Ã÷ÔÚ»ùÓÚÖ÷Á÷ä¯ÀÀÆ÷¾ùÒÑÍêÕûÊµÏÖµÄWebSocke…	Êý¾Ý·ÖÎö
Ò»ÖÖÓÃÓÚ½ðÈÚ½»Ò×Æ½Ì¨µÄ×Ô¶¯»¯²âÊÔ·½·¨ºÍÄ£ÄâÆ÷	ÉÏº£½ðÈÚÆÚ»õÐÅÏ¢¼¼ÊõÓÐÏÞ¹«Ë¾	2019-12-04	2020-06-19	CN111309590A	Ö÷·ÖÀàºÅ£ºG06F11/36(20060101)	ÔÚÉó-¹«¿ª	200120 ÉÏº£ÊÐÆÖ¶«ÐÂÇøÆÖµçÂ·438ºÅË«¸ë´óÏÃ7Â¥	±¾·¢Ã÷¹«¿ªÁËÒ»ÖÖÓÃÓÚ½ðÈÚ½»Ò×Æ½Ì¨µÄ×Ô¶¯»¯²âÊÔ·½·¨ºÍÄ£ÄâÆ÷£¬¿ÉÒÔÌá¹©¿É¿¿µÄ²âÊÔÔ¤ÆÚ½á¹û£¬ÏµÍ³²âÊÔÓÃÀý¿É¸´ÓÃ£¬½ø¶øÌá¸ßÏµÍ³µÄÕýÈ·ÐÔ¡¢¿É¿¿ÐÔ¼°ÑÐ·¢²âÊÔÐ§ÂÊ¡£Æä¼¼Êõ·½°¸Îª£º½ÓÊÕ½ðÈÚ½»Ò×Æ½Ì¨µÄ´ý²â½Ó¿Ú£»×Ô¶¯½âÎö½ÓÊÕµ½µÄ´ý²â½Ó¿Ú²¢´ÓÖÐ»ñÈ¡²ÎÊýÁÐ±í£»¸ù¾Ý»ñÈ¡µ½µÄ²ÎÊýÁÐ±íÉèÖÃ²ÎÊýÅä¶Ô¹ØÏµ£»¸ù¾Ý»ñÈ¡µ½µÄ²ÎÊýÁÐ±íºÍÉèÖÃµÄ²ÎÊýÅä¶Ô¹ØÏµ£¬Í¨¹ýÒÏÈºËã·¨Éú³É²âÊÔÓÃÀýÊý¾Ý£»¸ù¾ÝÉú³ÉµÄ²âÊÔÓÃÀýÊý¾ÝµÄÓÃÀýÊýÁ¿ÒÔ¼°ÀúÊ·ÓÃÀýÖ´ÐÐ»ùÏßÀ…	Êý¾Ý·ÖÎö
»úÎ»×ÊÔ´¹ÜÀí·½·¨¡¢×°ÖÃ¡¢Éè±¸¼°¼ÆËã»ú¿É¶Á´æ´¢½éÖÊ	ÉîÛÚÇ°º£Î¢ÖÚÒøÐÐ¹É·ÝÓÐÏÞ¹«Ë¾	2019-12-05	2020-04-14	CN111008110A	Ö÷·ÖÀàºÅ£ºG06F11/30(20060101)	ÔÚÉó-¹«¿ª	518000 ¹ã¶«Ê¡ÉîÛÚÊÐÇ°º£Éî¸ÛºÏ×÷ÇøÇ°ÍåÒ»Â·1ºÅA¶°201ÊÒ(Èë×¤ÉîÛÚÊÐÇ°º£ÉÌÎñÃØÊéÓÐÏÞ¹«Ë¾)	±¾·¢Ã÷Éæ¼°½ðÈÚ¿Æ¼¼¼¼ÊõÁìÓò£¬¹«¿ªÁËÒ»ÖÖ»úÎ»×ÊÔ´¹ÜÀí·½·¨¡¢×°ÖÃ¡¢Éè±¸¼°¼ÆËã»ú¿É¶Á´æ´¢½éÖÊ¡£¸Ã»úÎ»×ÊÔ´¹ÜÀí·½·¨°üÀ¨£ºÔÚ½ÓÊÕµ½Éè±¸ÉÏ¼ÜÇëÇóÊ±£¬¸ù¾ÝËùÊöÉè±¸ÉÏ¼ÜÇëÇó»ñÈ¡»ú¼ÜÐÅÏ¢ºÍÐÂÔö»úÎ»Éè±¸ÐÅÏ¢£»¸ù¾ÝËùÊö»ú¼ÜÐÅÏ¢»ñÈ¡Ä¿±ê»ú¼ÜµÄ°²È«ÔËÐÐ¹¦ÂÊºÍÊµ¼ÊÔËÐÐ¹¦ÂÊ£¬²¢¸ù¾ÝËùÊöÐÂÔö»úÎ»Éè±¸ÐÅÏ¢¼ÆËãÐÂÔöÉè±¸¹¦ÂÊ£»¸ù¾ÝËùÊö°²È«ÔËÐÐ¹¦ÂÊ¡¢ËùÊöÊµ¼ÊÔËÐÐ¹¦ÂÊºÍËùÊöÐÂÔöÉè±¸¹¦ÂÊ£¬ÅÐ¶ÏÊÇ·ñ»á´æÔÚ»ú¼ÜµçÁ¦³¬±êµÄÇé¿ö£»ÈôÊÇ£¬ÔòÉú³É¶ÔÓ¦µ…	°²È«
Ò»ÖÖ´úÂëÖÊÁ¿µÄÆÀ¹À·½·¨¼°×°ÖÃ	ÉîÛÚÇ°º£Î¢ÖÚÒøÐÐ¹É·ÝÓÐÏÞ¹«Ë¾	2019-12-10	2020-05-15	CN111159013A	Ö÷·ÖÀàºÅ£ºG06F11/36(20060101)	ÔÚÉó-¹«¿ª	518027 ¹ã¶«Ê¡ÉîÛÚÊÐÇ°º£Éî¸ÛºÏ×÷ÇøÇ°ÍåÒ»Â·1ºÅA¶°201ÊÒ	±¾·¢Ã÷Éæ¼°½ðÈÚ¿Æ¼¼(Fintech)ÁìÓò£¬²¢¹«¿ªÁËÒ»ÖÖ´úÂëÖÊÁ¿µÄÆÀ¹À·½·¨¼°×°ÖÃ£¬ÆäÖÐ£¬·½·¨°üÀ¨£º»ñÈ¡±ä¸üÀàÎÄ¼þ£»ÆäÖÐ£¬±ä¸üÀàÎÄ¼þÊÇ¶¨Òå±ä¸üº¯ÊýµÄ´úÂë£¬±ä¸üº¯ÊýÊÇ¸ù¾ÝµÚÒ»ÀàÎÄ¼þºÍµÚ¶þÀàÎÄ¼þÈ·¶¨µÄ´úÂë±ä¸üËù¶ÔÓ¦µÄº¯Êý£»µÚÒ»ÀàÎÄ¼þÊÇ×îÐÂÌá½»µÄ¶¨Òåº¯ÊýµÄ´úÂë£¬µÚ¶þÀàÎÄ¼þÊÇÌá½»µÚÒ»ÀàÎÄ¼þÖ®Ç°Ò»´ÎÌá½»µÄ¶¨Òåº¯ÊýµÄ´úÂë£»µÚÒ»ÀàÎÄ¼þºÍµÚ¶þÀàÎÄ¼þ¶¨ÒåÏàÍ¬ÒµÎñËùÉæ¼°µÄº¯Êý£»¸ù¾Ý±ä¸üÀàÎÄ¼þºÍµÚÒ»ÀàÎÄ¼þ£¬È·¶¨±ä¸üÀàÎÄ¼þµÄÖÊÁ¿¡£¸Ã…	Êý¾Ý·ÖÎö
Ò»ÖÖ½ðÈÚ¼¶»ùÓÚA10µÄ¸ß¿ÉÓÃMySQLÊý¾Ý¿âÊµÏÖ·½·¨	ÁÉÄþÕñÐËÒøÐÐ¹É·ÝÓÐÏÞ¹«Ë¾	2019-12-20	2020-05-01	CN111090637A	Ö÷·ÖÀàºÅ£ºG06F16/21(20190101)	ÔÚÉó-¹«¿ª	110000 ÁÉÄþÊ¡ÉòÑôÊÐÉòºÓÇø±±Õ¾Â·61ºÅ	±¾·¢Ã÷¹«¿ªÁËÒ»ÖÖ½ðÈÚ¼¶»ùÓÚA10µÄ¸ß¿ÉÓÃMySQLÊý¾Ý¿âÊµÏÖ·½·¨£¬Éæ¼°½ðÈÚ¼¼ÊõÁìÓò£¬¸Ã·½·¨ÈçÏÂ£ºÓ¦ÓÃ³ÌÐòÁ¬½ÓA10Éè±¸£»A10Éè±¸´î½¨Ë«»úÈÈ±¸Ä£Ê½¹¤×÷£»A10Éè±¸Á¬½ÓMySQLÊý¾Ý¿â¼¯ÈººÍA10Éè±¸Á¬½ÓÕæÊµ·þÎñÆ÷¡£±¾·¢Ã÷Í¨¹ýÁ½Ì¨A10Éè±¸ÊµÏÖÁË¸ºÔØµÄÖ÷±¸¸ß¿ÉÓÃ£¬·ÀÖ¹³öÏÖµ¥µã¹ÊÕÏ£»A10°ó¶¨MGRÖÐ¶à¸ö½Úµã£¬Í¨¹ý½¡¿µ¼ì²éÀ´×Ô¶¯ÇÐ»»·ÃÎÊÇëÇó£»MGR¼¼Êõ»ùÓÚPaxos·Ö²¼Ê½Ð­ÒéÂú×ã½ðÈÚÐÐÒµ¶ÔÊý¾ÝÒ»ÖÂÐÔÐÐ¡¢ÒµÎñÁ¬ÐøÐÔÒÔ¼°Êý¾Ý¿â¿ªÔ´¿É¿ØµÈÒªÇó£¬¶ÔM…	Êý¾Ý·ÖÎö
»ñÈ¡Ïû·ÑÊý¾ÝµÄ·½·¨¡¢×°ÖÃºÍ·þÎñÆ÷	±±¾©ÊýÑÜ¿Æ¼¼ÓÐÏÞ¹«Ë¾	2019-12-26	2020-05-12	CN111144943A	Ö÷·ÖÀàºÅ£ºG06Q30/02(20120101)	ÔÚÉó-¹«¿ª	100000 ±±¾©ÊÐ³¯ÑôÇøÀûÔóÖÐ¶þÂ·2ºÅB×ùÎå²ã510ÊÒ	±¾·¢Ã÷Ìá¹©ÁËÒ»ÖÖ»ñÈ¡Ïû·ÑÊý¾ÝµÄ·½·¨¡¢×°ÖÃºÍ·þÎñÆ÷£¬ÆäÖÐ£¬¸Ã·½·¨°üÀ¨£º¼àÌýÔ¤ÉèµÄÊÕÒø´òÓ¡ÏµÍ³ÖÐÊÇ·ñ´æÔÚÖ¸¶¨À©Õ¹ÃûµÄÎÄ¼þ£»Èç¹û´æÔÚÖ¸¶¨À©Õ¹ÃûµÄÎÄ¼þ£¬²É¼¯¸ÃÖ¸¶¨À©Õ¹ÃûµÄÎÄ¼þ£»½«¸ÃÖ¸¶¨À©Õ¹ÃûµÄÎÄ¼þ£¬×ª»»³ÉÎÄ±¾ÐÎÊ½µÄÊý¾Ý£»ÌáÈ¡¸ÃÎÄ±¾ÐÎÊ½µÄÊý¾ÝÖÐµÄÏû·ÑÐÅÏ¢£¬µÃµ½Ïû·ÑÊý¾Ý¡£±¾·¢Ã÷¼à¿Øµ½ÊÕÒø´òÓ¡ÏµÍ³ÖÐ´æÔÚÖ¸¶¨À©Õ¹ÃûµÄÎÄ¼þÊ±£¬²É¼¯¸ÃÖ¸¶¨À©Õ¹ÃûµÄÎÄ¼þ£¬²¢½«¸ÃÎÄ¼þ×ª»»³ÉÎÄ±¾ÐÎÊ½µÄÊý¾Ý£¬Ïà¶ÔÓÚ½âÎöÊÕÒø´òÓ¡ÏµÍ³·¢ËÍµÄ´òÓ¡Ö…	Êý¾Ý·ÖÎö
POS»úÖÐË«CPUµÄÍ¨Ñ¶·½·¨ºÍ×°ÖÃ	ÉÏº£ÉÌÃ×¿Æ¼¼¼¯ÍÅ¹É·ÝÓÐÏÞ¹«Ë¾	2019-12-26	2020-05-22	CN111191260A	Ö÷·ÖÀàºÅ£ºG06F21/60(20130101)	ÔÚÉó-¹«¿ª	200433 ÉÏº£ÊÐÑîÆÖÇøäÁ»¦Â·388ºÅ505ÊÒ	±¾·¢Ã÷Ìá¹©Ò»ÖÖPOS»úÖÐË«CPUµÄÍ¨Ñ¶·½·¨ºÍ×°ÖÃ£¬ÆäÖÐ·½·¨°üÀ¨£ºPOS»úÖÐµÄÍ¨ÓÃCPUºÍ°²È«CPUÍ¨¹ýÎÕÊÖ½¨Á¢ÆÕÍ¨Í¨ÐÅ»á»°£»Í¨ÓÃCPUÏò°²È«CPU·¢ËÍÇëÇó°ü£¬°²È«CPUÊÕµ½ÇëÇó°üºóÏòÍ¨ÓÃCPUÏìÓ¦Ó¦´ð°ü£»Èç¹ûÍ¨ÓÃCPU½ÓÊÕµ½µÄÓ¦´ð°üÊÇÏµÍ³¼¶ÃüÁîÓ¦´ð°ü»òÕßÓÃ»§¼¶ÃüÁîÓ¦´ð°ü£¬Ôò½«ËùÊöÓ¦´ð°ü·Ö·¢µ½¶ÔÓ¦µÄ´¦ÀíÈÎÎñÖÐ½øÐÐ¶àÏûÏ¢²¢·¢´¦Àí¡£±¾·¢Ã÷ÄÜ¹»±£Ö¤Ë«CPU¼ä°²È«ÎÈ¶¨µÄÍ¨ÐÅ¡£	°²È«
»ùÓÚË¢Á³Ö§¸¶µÄÊý¾ÝÓµ¶Â´¦Àí·½·¨¼°×°ÖÃ	ÉîÛÚÊÐÎåÁªÔÆ¿Æ¼¼ÓÐÏÞ¹«Ë¾	2020-01-10	2020-06-05	CN111240938A	Ö÷·ÖÀàºÅ£ºG06F11/30(20060101)	ÔÚÉó-¹«¿ª	518000 ¹ã¶«Ê¡ÉîÛÚÊÐ¸£ÌïÇøÉ³Í·½ÖµÀÐÂÖÞÊ®Ò»½Ö128ºÅÏéì÷Í¶×Ê´óÏÃÊ®Áù²ã1602	±¾ÉêÇëÌá¹©ÁËÒ»ÖÖ»ùÓÚË¢Á³Ö§¸¶µÄÊý¾ÝÓµ¶Â´¦Àí·½·¨¼°×°ÖÃ£¬ÔËÓÃÓÚ¿ì½ÝÖ§¸¶¼¼ÊõÁìÓò£¬Æä·½·¨Îª£º½«Ë¢Á³Ö§¸¶Éè±¸ÓëÊý¾Ý¿â½øÐÐÅäÖÃ»¯Ðí¿É¶Ô½Ó£¬ÊµÏÖË¢Á³Ö§¸¶Éè±¸ÓëÊý¾Ý¿âµÄ¶Ô½Ó£¬Ë¢Á³Ö§¸¶Éè±¸Ëù»ñÈ¡µ½µÄ¿Í»§Ãæ²¿Í¼Æ¬ÄÜ¹»ÉÏ´«ÖÁÊý¾Ý¿â£¬ÒÔ½ø¶øÈ·¶¨³ö¶ÔÓ¦µÄIDÕË»§£¬×îÖÕÊµÏÖ¿Û¿î£»»ñÈ¡¿Í»§µÄÃæ²¿Í¼Æ¬£»ÔÚ»ñÈ¡µ½Ãæ²¿Í¼Æ¬ºó£¬¼àÌýËùÊöÊý¾Ý¿âµ±Ç°µÄCPUÕ¼ÓÃ±È£¬²¢¸ù¾ÝËùÊöCPUÕ¼ÓÃ±È²ÉÓÃ¶ÔÓ¦µÄÔ¤Éè¹æÔò´ÓËùÊöÊý¾Ý¿âÖÐÈ·¶¨³öÓëÃæ²¿Í¼Æ¬Ô¤¹ØÁªµ…	Ö§¸¶
Ò»ÖÖ²¢ÕË¹¦ÄÜµÄ²âÊÔ·½·¨¼°×°ÖÃ	ÒËÈËºãÒµ¿Æ¼¼·¢Õ¹£¨±±¾©£©ÓÐÏÞ¹«Ë¾	2020-01-16	2020-06-12	CN111274138A	Ö÷·ÖÀàºÅ£ºG06F11/36(20060101)	ÔÚÉó-¹«¿ª	100022 ±±¾©ÊÐ³¯ÑôÇø½¨¹úÂ·91ºÅÔº9ºÅÂ¥10²ã1018ÊÒ	±¾·¢Ã÷ÎªÒ»ÖÖ²¢ÕË¹¦ÄÜµÄ²âÊÔ·½·¨¼°×°ÖÃ£¬×Ô¶¯»¯ÊµÏÖÔÚÐÅ´ûÏµÍ³ºÍÒøÐÐºËÐÄÏµÍ³µÄ¼¯³É²âÊÔÖÐ¶Ô²¢ÕË¹¦ÄÜµÄ²âÊÔ£¬²âÊÔÖÜÆÚÖÐµÄÃ¿¸ö²âÊÔÈÕÆÚÔÚÐÅ´ûÏµÍ³Ä£ÄâÖ´ÐÐÈÕÇÐ¹ý³ÌÖÐµÄÅú´¦ÀíÈÎÎñ£¬Éú³É²¢ÕËÎÄ¼þ£¬Í¨¹ý½öÔÚÐÅ´ûÏµÍ³ÈÕÇÐµ½ÊµÊ±½»Ò×ÈÕÆÚµÄÇé¿öÏÂ£¬ÔÚÒøÐÐºËÐÄÏµÍ³Ä£ÄâÖ´ÐÐÈÕÇÐ²Ù×÷£¬½ø¶øÔÚÐÅ´ûÏµÍ³ÈÕÇÐµ½»¹¿îÈÕÆÚ´ÎÈÕµÄÇé¿öÏÂ£¬ÔÚÐÅ´ûÏµÍ³¶Ô²âÊÔÖÜÆÚÖÐÃ¿¸ö²âÊÔÈÕÆÚÉú³ÉµÄ²¢ÕËÎÄ¼þ½øÐÐºÏ²¢£¬ÀûÓÃºÏ²¢ºóµÄ²¢ÕËÎÄ¼þ£¬ÔÚÐÅ´ûÏµÍ³ºÍÒøÐÐºËÐ…	½è´û
Ò»ÖÖ¿ª·ÅÒøÐÐÆ½Ì¨µÄÏµÍ³	ÖÐ¿Æ°Ø³Ï¿Æ¼¼£¨±±¾©£©¹É·ÝÓÐÏÞ¹«Ë¾	2020-01-21	2020-06-12	CN111275424A	Ö÷·ÖÀàºÅ£ºG06Q20/10(20120101)	ÔÚÉó-¹«¿ª	100020 ±±¾©ÊÐ³¯ÑôÇø¹â»ªÂ·22ºÅ1µ¥Ôª1101ÊÒ	±¾·¢Ã÷¹«¿ªÁËÒ»ÖÖ¿ª·ÅÒøÐÐÆ½Ì¨µÄÏµÍ³£¬¸ÃÏµÍ³°üÀ¨Í¶×ÊÀí²ÆÄ£¿é°üÀ¨ÒøÐÐÀí²Æ²úÆ·¡¢´úÏú²úÆ·Ä£¿é£»´æ¿î¹ÜÀíÄ£¿éÓÃÓÚÓÃ»§¹ºÂò´æ¿î²úÆ·£»´û¿î¹ÜÀíÄ£¿é°üÀ¨´û¿î²úÆ·¡¢´û¿î¼ÆËãÆ÷¡¢ÎÒµÄ´û¿îÄ£¿é£»µç×ÓÇ®°üÄ£¿é°üÀ¨¿ª»§¡¢Àí²Æ¡¢·ÖÆÚ¸¶¿î¡¢»»¿¨¡¢ÌáÏÖ¡¢³äÖµ¡¢ÉèÖÃ½»Ò×ÃÜÂë¡¢²éÑ¯½»Ò×Ã÷Ï¸Ä£¿é£»±ãÃñ·þÎñÄ£¿éÓÃÓÚÓÃ»§´ú½É·ÑÓÃ£»½ðÈÚ²úÆ·¹ÜÀíÄ£¿éÓÃÓÚÌá¹©²úÆ·ÉúÃüÖÜÆÚ¹ÜÀí£¬´¦Àí¸÷ÖÖ³¡¾°ÒµÎñ£»ºÏ×÷·½·þÎñÄ£¿éÓÃÓÚÌá¹©×¢²áÈÏÖ¤¡¢µÇÂ¼£¬×Ô¶¯Íê³…	½è´û
Í¼Æ¬äÖÈ¾·½·¨¡¢×°ÖÃºÍµç×ÓÉè±¸	Ö§¸¶±¦£¨º¼ÖÝ£©ÐÅÏ¢¼¼ÊõÓÐÏÞ¹«Ë¾	2020-02-06	2020-06-26	CN111338932A	Ö÷·ÖÀàºÅ£ºG06F11/36(20060101)	ÔÚÉó-¹«¿ª	310007 Õã½­Ê¡º¼ÖÝÊÐÎ÷ºþÇøÎ÷ÏªÂ·556ºÅ8²ãB¶Î801-11	±¾ËµÃ÷ÊéÌá³öÁËÒ»ÖÖÍ¼Æ¬äÖÈ¾·½·¨¡¢×°ÖÃºÍµç×ÓÉè±¸£¬ÆäÖÐ£¬ÉÏÊöÍ¼Æ¬äÖÈ¾·½·¨ÖÐ£¬ÔÚÇ°¶Ë´¥·¢ÎÞÏßÖ§¸¶×Ô¶¯»¯²âÊÔÖ®ºó£¬ÎÞÏßÖ§¸¶×é¼þÖ´ÐÐÎÞÏßÖ§¸¶×Ô¶¯»¯²âÊÔµÄ²âÊÔÓÃÀýÖÐµÄÖ§¸¶²½Öè£¬»ñµÃÃ¿¸öÖ§¸¶²½Öè¶ÔÓ¦µÄÖ§¸¶Êý¾Ý£¬²¢»ñÈ¡¶ÔÓ¦µÄÄ£°å£¬È»ºó¸ù¾ÝÃ¿¸öÖ§¸¶²½Öè¶ÔÓ¦µÄÄ£°å¶ÔÉÏÊöÖ§¸¶Êý¾Ý½øÐÐ×é×°£¬»ñµÃÃ¿¸öÖ§¸¶²½Öè¶ÔÓ¦µÄÄ£°åÊý¾Ý£¬²¢½«»ñµÃµÄÄ£°åÊý¾Ý·¢ËÍ¸øÊý¾Ý¿ÉÊÓ»¯×é¼þ¡£Êý¾Ý¿ÉÊÓ»¯×é¼þ½ÓÊÕÄ£°åÊý¾ÝÖ®ºó£¬½«ÉÏÊöÄ£°åÊý¾Ý·¢ËÍ¸øÄ£°åä…	Ö§¸¶
´óÊý¾Ý¼à¿Ø·½·¨¡¢×°ÖÃ¡¢Éè±¸¼°¼ÆËã»ú¿É¶Á´æ´¢½éÖÊ	ÉîÛÚÇ°º£Î¢ÖÚÒøÐÐ¹É·ÝÓÐÏÞ¹«Ë¾	2020-02-18	2020-06-16	CN111290916A	Ö÷·ÖÀàºÅ£ºG06F11/30(20060101)	ÔÚÉó-¹«¿ª	518000 ¹ã¶«Ê¡ÉîÛÚÊÐÇ°º£Éî¸ÛºÏ×÷ÇøÇ°ÍåÒ»Â·1ºÅA¶°201ÊÒ(Èë×¤ÉîÛÚÊÐÇ°º£ÉÌÎñÃØÊéÓÐÏÞ¹«Ë¾)	±¾·¢Ã÷Éæ¼°½ðÈÚ¿Æ¼¼ÁìÓò£¬²¢¹«¿ªÁËÒ»ÖÖ´óÊý¾Ý¼à¿Ø·½·¨£¬°üÀ¨ÈçÏÂ²½Öè£º»ñÈ¡¸üÐÂµÄÔ­Ê¼Êý¾Ý£¬¸ù¾ÝÌØÕ÷ÌáÈ¡¹æÔò´¦ÀíËùÊöÔ­Ê¼Êý¾Ý£¬»ñµÃËùÊöÔ­Ê¼Êý¾ÝµÄÌØÕ÷Ö¸±ê£»ÔÚ½ÓÊÕµ½Êý¾Ý¼à¿ØÖ¸ÁîÊ±£¬»ñÈ¡ËùÊöÊý¾Ý¼à¿ØÖ¸ÁîÖÐµÄÄ¿±ê¼à¿Ø²ÎÊý£»¼à¿ØËùÊöÄ¿±ê¼à¿Ø²ÎÊý¹ØÁªµÄÄ¿±êÌØÕ÷Ö¸±ê£¬½«ËùÊöÄ¿±êÌØÕ÷Ö¸±êÓëËùÊöÄ¿±êÌØÕ÷Ö¸±ê¶ÔÓ¦µÄÌØÕ÷ãÐÖµ½øÐÐ±È¶Ô£»ÔÚËùÊöÄ¿±êÌØÕ÷Ö¸±ê´óÓÚËùÊöÌØÕ÷ãÐÖµÊ±£¬Êä³öÄ¿±ê¼à¿Ø²ÎÊýÒì³£µÄÌáÊ¾ÐÅÏ¢¡£±¾·¢Ã÷»¹¹«¿ªÁËÒ»ÖÖ´…	Êý¾Ý·ÖÎö
½ðÈÚ½»Ò×Èí¼þµÄÖÊÁ¿¼ì²â·½·¨¼°×°ÖÃ	ÖÐ¹ú¹¤ÉÌÒøÐÐ¹É·ÝÓÐÏÞ¹«Ë¾	2020-02-28	2020-06-30	CN111352841A	Ö÷·ÖÀàºÅ£ºG06F11/36(20060101)	ÔÚÉó-¹«¿ª	100140 ±±¾©ÊÐÎ÷³ÇÇø¸´ÐËÃÅÄÚ´ó½Ö55ºÅ	±¾ÉêÇëÌá¹©Ò»ÖÖ½ðÈÚ½»Ò×Èí¼þµÄÖÊÁ¿¼ì²â·½·¨¼°×°ÖÃ£¬¸Ã·½·¨°üÀ¨£º»ùÓÚÔ¤ÉèµÄDevOpsÎÄ¼þ£¬Ó¦ÓÃJenkins¹¤¾ß´¥·¢Ä¿±ê½ðÈÚ½»Ò×Èí¼þµÄÈí¼þ²âÊÔ¹ý³Ì£¬²¢¸ù¾Ý²âÊÔ½á¹û»ñÈ¡Ä¿±ê½ðÈÚ½»Ò×Èí¼þµÄ»ù±¾Èí¼þÖÊÁ¿Êý¾Ý£¬ÒÔ¼°½«»ù±¾ÖÊÁ¿Ö¸±êÊý¾Ý´æ´¢ÔÚJira¹¤¾ßÖÐ£¬Jira¹¤¾ßÖÐ»¹´æ´¢ÓÐÄ¿±ê½ðÈÚ½»Ò×Èí¼þµÄ½ø¶ÈÖ¸±êÊý¾Ý£»ÅÐ¶ÏÄ¿±êÏµÍ³ÖÐÊÇ·ñ´æÔÚÓÃ»§ÆÀ¼ÛÖ¸±êÊý¾Ý£¬ÈôÊÇ£¬½«ÓÉÓÃ»§ÆÀ¼ÛÖ¸±êÊý¾Ý¡¢»ù±¾ÖÊÁ¿Ö¸±êÊý¾ÝºÍ½ø¶ÈÖ¸±êÊý¾Ý×é³ÉµÄÄ¿±êÈí¼þÖÊÁ¿Ö¸±êÊý…	Êý¾Ý·ÖÎö
Ò»ÖÖ²âÊÔ²ÎÊýµÄÉú³É·½·¨¼°×°ÖÃ	ÉîÛÚÇ°º£Î¢ÖÚÒøÐÐ¹É·ÝÓÐÏÞ¹«Ë¾	2020-03-06	2020-07-03	CN111367806A	Ö÷·ÖÀàºÅ£ºG06F11/36(20060101)	ÔÚÉó-¹«¿ª	518027 ¹ã¶«Ê¡ÉîÛÚÊÐÇ°º£Éî¸ÛºÏ×÷ÇøÇ°ÍåÒ»Â·1ºÅA¶°201ÊÒ	±¾·¢Ã÷¹«¿ªÁËÒ»ÖÖ²âÊÔ²ÎÊýµÄÉú³É·½·¨¼°×°ÖÃ£¬ÆäÖÐ·½·¨Îª£º»ñÈ¡±íÕ÷´ý²â¸÷²ÎÊýÖ®¼äÒÀÀµ¹ØÏµµÄµÚÒ»Âß¼­±í´ïÊ½£»½«ËùÊöµÚÒ»Âß¼­±í´ïÊ½×ª»»ÎªµÚ¶þÂß¼­±í´ïÊ½£¬¸ù¾ÝËùÊöµÚ¶þÂß¼­±í´ïÊ½È·¶¨ËùÊö´ý²â¸÷²ÎÊýµÄÈ¡Öµ·¶Î§µÄ¸÷µÈ¼ÛÀà£¬²¢Éú³ÉËùÊö¸÷µÈ¼ÛÀàµÄ²âÊÔ²ÎÊý¡£ÉÏÊö·½·¨Ó¦ÓÃÓÚ½ðÈÚ¿Æ¼¼(Fintech)Ê±£¬¿ÉÒÔ×Ô¶¯×¼È·µØÉú³É¸÷µÈ¼ÛÀàµÄ²âÊÔ²ÎÊý¡£	Êý¾Ý·ÖÎö
Ò»ÖÖÊý¾Ý¼ì²â·½·¨¼°×°ÖÃ	ÉîÛÚÇ°º£Î¢ÖÚÒøÐÐ¹É·ÝÓÐÏÞ¹«Ë¾	2020-03-13	2020-07-10	CN111400155A	Ö÷·ÖÀàºÅ£ºG06F11/34(20060101)	ÔÚÉó-¹«¿ª	518027 ¹ã¶«Ê¡ÉîÛÚÊÐÇ°º£Éî¸ÛºÏ×÷ÇøÇ°ÍåÒ»Â·1ºÅA¶°201ÊÒ	±¾ÉêÇëÉæ¼°½ðÈÚ¿Æ¼¼(Fintech)ÁìÓò£¬¹«¿ªÁËÒ»ÖÖÊý¾Ý¼ì²â·½·¨¼°×°ÖÃ£¬¸Ã·½·¨°üÀ¨£º»ñÈ¡µÚÒ»²ÉÑùÊ±¼ä¶ÔÓ¦µÄµÚÒ»½»Ò×Á¿ºÍËùÊöµÚÒ»²ÉÑùÊ±¼äÖ®Ç°µÄN¸ö²ÉÑùÊ±¼ä·Ö±ð¶ÔÓ¦µÄN¸öµÚ¶þ½»Ò×Á¿£»¸ù¾ÝÑ¡È¡µÄM¸öÒì³£ÖµÅÐ¶¨·½·¨ºÍËùÊöN¸öµÚ¶þ½»Ò×Á¿£¬È·¶¨ËùÊöµÚÒ»½»Ò×Á¿¶ÔÓ¦µÄM¸ö¼ì²â½á¹û£»¸ù¾ÝÔ¤ÉèµÄÍ¶Æ±·½·¨¶ÔËùÊöM¸ö¼ì²â½á¹û½øÐÐÍ¶Æ±£¬È·¶¨ËùÊöµÚÒ»½»Ò×Á¿¶ÔÓ¦µÄÍ¶Æ±Êý£»ÈôËùÊöµÚÒ»½»Ò×Á¿¶ÔÓ¦µÄÍ¶Æ±Êý´óÓÚÔ¤ÉèµÄÆ±ÊýãÐÖµ£¬ÔòÈ·¶¨ËùÊöµÚÒ»½»Ò×Á¿Òì…	Êý¾Ý·ÖÎö
ÒÆ¶¯Ö§¸¶»ú¾ß²âÊÔ·½·¨¼°²âÊÔÏµÍ³	ÎäººÐ¡ÂëÁª³Ç¿Æ¼¼ÓÐÏÞ¹«Ë¾	2020-03-16	2020-08-18	CN111552603A	Ö÷·ÖÀàºÅ£ºG06F11/26(20060101)	ÔÚÉó-¹«¿ª	430014 ºþ±±Ê¡ÎäººÊÐ½­°¶Çøµ¤Ë®³ØÂ·143ºÅ	±¾·¢Ã÷¹«¿ªÁËÒÆ¶¯Ö§¸¶»ú¾ß²âÊÔ·½·¨¼°²âÊÔÏµÍ³,¸Ã²âÊÔ·½·¨°üÀ¨£º²âÊÔÖÕ¶Ë¿ØÖÆÒÆ¶¯Ö§¸¶¶Ë°´µÚÒ»Ê±¼ä¼ä¸ôË¢ÐÂÖ§¸¶Âë£¬²ÉÓÃÍ¶ÆÁ·½Ê½»ñÈ¡ËùÊöÖ§¸¶ÂëµÄÍ¶ÆÁ½çÃæ£»¶ÔËùÊöÍ¶ÆÁ½çÃæ°´µÚ¶þÊ±¼ä¼ä¸ô½øÐÐÆÁÄ»½ØÍ¼µÃµ½½ØÆÁÍ¼Ïñ£»½«ËùÊö½ØÆÁÍ¼ÏñÌá¹©¸øÒÆ¶¯Ö§¸¶»ú¾ß´¦Àí¡£ÓÉÓÚÒÆ¶¯Ö§¸¶¶Ë±»Í¶ÆÁµ½²âÊÔÖÕ¶Ë£¬ÒÆ¶¯Ö§¸¶¶ËÖ§¸¶Ò³ÃæµÄË¢ÐÂÓÉ²âÊÔÖÕ¶Ë×Ô¶¯¿ØÖÆ£¬ÎÞÐèÈË¹¤£¬²¢ÇÒ²âÊÔÖÕ¶ËÄÜ×Ô¶¯´óÁ¿½ØÆÁ£¬¿Ë·þÏÖÓÐ¼¼ÊõÖÐÒÆ¶¯Ö§¸¶¶Ë²»ÔÊÐí×Ô¶¯½ØÆÁµÄÈ±µã¡£±¾…	Ö§¸¶
ÒÆ¶¯Ö§¸¶»ú¾ß³ÌÐò²âÊÔ·½·¨¡¢²âÊÔÏµÍ³¼°Ò»ÖÖ²âÊÔÖÕ¶Ë	ÎäººÐ¡ÂëÁª³Ç¿Æ¼¼ÓÐÏÞ¹«Ë¾	2020-03-16	2020-08-18	CN111552604A	Ö÷·ÖÀàºÅ£ºG06F11/26(20060101)	ÔÚÉó-¹«¿ª	430014 ºþ±±Ê¡ÎäººÊÐ½­°¶Çøµ¤Ë®³ØÂ·143ºÅ	±¾·¢Ã÷¹«¿ªÁËÒÆ¶¯Ö§¸¶»ú¾ß³ÌÐò²âÊÔ·½·¨¡¢²âÊÔÏµÍ³¼°Ò»ÖÖ²âÊÔÖÕ¶Ë¡£ÒÆ¶¯Ö§¸¶»ú¾ß³ÌÐò²âÊÔ·½·¨°üÀ¨£º²âÊÔÖÕ¶Ë½¨Á¢ÐéÄâ»ú¹¹½¨ÒÆ¶¯Ö§¸¶»ú¾ß²Ù×÷ÏµÍ³£¬½«Ô¤ÉèÑéÂë¿â¼°ÖÕ¶Ë³ÌÐò¼ÓÈëµ½ÒÆ¶¯Ö§¸¶»ú¾ß²Ù×÷ÏµÍ³ÖÐÖ´ÐÐ£»»ñÈ¡Ö§¸¶Âë£¬²¢½âÎöÖ§¸¶ÂëµÃµ½Ö§¸¶ÐÅÏ¢£»½«µÃµ½µÄÖ§¸¶ÐÅÏ¢·¢ËÍµ½ËùÊöÐéÄâ»ú´¦Àí²¢½ÓÊÕ´¦Àí½á¹û¡£²âÊÔÈËÔ±¿ÉÒÔÔÚÖ±½Ó²âÊÔÖÕ¶ËÉÏ²é¿´Ä£ÄâµÄÒÆ¶¯Ö§¸¶»ú¾ß¶ÔÖ§¸¶ÂëµÄ´¦Àí½á¹û£¬ÎÞÐèµÇÂ½µ½ÒÆ¶¯Ö§¸¶»ú¾ßÊµÎïÄÚ£¬¸ù¾Ý´¦Àí½á¹ûÅÐ¶ÏÒ…	Ö§¸¶
Ò»ÖÖÕë¶ÔÍ¼Êý¾Ý¿â¼°Í¼·þÎñ½Ó¿Ú½øÐÐ·Ö²¼Ê½Ñ¹²âÏµÍ³¼°·½·¨	±±¾©º£ÖÂÐÇÍ¼¿Æ¼¼ÓÐÏÞ¹«Ë¾	2020-03-20	2020-08-18	CN111552628A	Ö÷·ÖÀàºÅ£ºG06F11/36(20060101)	ÔÚÉó-¹«¿ª	100000 ±±¾©ÊÐº£µíÇøÑ§ÔºÂ·¼×5ºÅ768´´ÒâÔ°B×ù8ºÅÃÅ	±¾·¢Ã÷Éæ¼°»¥ÁªÍø¼¼ÊõÁìÓò£¬¾ßÌåÉæ¼°Ò»ÖÖÕë¶ÔÍ¼Êý¾Ý¿â¼°Í¼·þÎñ½Ó¿Ú½øÐÐ·Ö²¼Ê½Ñ¹²âÏµÍ³¼°·½·¨£¬Ìá³öµÄÏµÍ³°üÀ¨½ÓÈë²ãÄ£¿é¡¢¼ÆËãÒýÇæÄ£¿é¡¢´æ´¢²ãÄ£¿é¡¢Ñ¹²âÈÕÖ¾·ÖÎöÄ£¿é¡¢Ç°¶ËÕ¹Ê¾Ä£¿é¡¢¹ÜÀíÄ£¿é¡¢·Ö²¼Ê½×ÊÔ´¹ÜÀíÄ£¿é¡£Ìá³öµÄ·½·¨°üÀ¨Á½¸ö²½Öè¡£±¾·¢Ã÷£¬½«¶àÖÖÑ¹²â·½Ê½¼¯³ÉÒ»Ìå£¬ÒÔÂú×ãÐ¡ÖÐ´óÆóÒµµÄ´óÖÐÐ¡¸÷ÖÖÏîÄ¿¼°Êý¾Ý¿âµÄÑ¹²âÐèÇó£¬²¢ÇÒÍ¬Ê±Ö§³ÖÀëÏß±¨±í£¬ÔÚÏß±¨±í£¬ÊµÊ±±¨±í£¬ÀúÊ·±¨±íµÄÕ¹Ê¾¼°²é¿´£¬ÒÔ¼°¶Ô±È¹¦ÄÜ£¬Ö§³ÖÔ¤ÏÈÊý¾…	Êý¾Ý·ÖÎö
ÓÃÓÚ²âÊÔ½ðÈÚÊý¾Ý¿âÐÔÄÜµÄ·½·¨¡¢×°ÖÃºÍÏµÍ³	ÖÐ¹úÐÅÏ¢Í¨ÐÅÑÐ¾¿Ôº	2020-03-26	2020-07-24	CN111444073A	Ö÷·ÖÀàºÅ£ºG06F11/34(20060101)	ÔÚÉó-¹«¿ª	100191 ±±¾©ÊÐº£µíÇø»¨Ô°±±Â·52ºÅ	±¾ÉêÇëÉæ¼°·þÎñÆ÷ÐÔÄÜ²âÊÔ¼¼ÊõÁìÓò£¬¹«¿ªÒ»ÖÖÓÃÓÚ²âÊÔ½ðÈÚÊý¾Ý¿âÐÔÄÜµÄ·½·¨¡£¸ÃÓÃÓÚ²âÊÔ½ðÈÚÊý¾Ý¿âÐÔÄÜµÄ·½·¨°üÀ¨£ºÒÀ´ÎÔËÐÐ½ðÈÚ»ú¹¹µÄ¶à¸ö²âÊÔÒµÎñ£¬¶ÔÏà¹ØÖ¸±ê½øÐÐÍ³¼Æ£¬Êä³öÍ³¼Æ½á¹û¡£²ÉÓÃ¸ÃÓÃÓÚ²âÊÔ½ðÈÚÊý¾Ý¿âÐÔÄÜµÄ·½·¨»ñµÃµÄÍ³¼Æ½á¹û¿É¸ü¼Ó×¼È·µØ·´Ó³±»²âÊý¾Ý¿âµÄÐÔÄÜ¡£±¾ÉêÇë»¹¹«¿ªÒ»ÖÖÓÃÓÚ²âÊÔ½ðÈÚÊý¾Ý¿âÐÔÄÜµÄ×°ÖÃºÍÏµÍ³¡£	Êý¾Ý·ÖÎö
Òì³£´¦Àí¼ì²â·½·¨¡¢×°ÖÃ¡¢Éè±¸¼°¼ÆËã»ú´æ´¢½éÖÊ	ÉîÛÚÇ°º£Î¢ÖÚÒøÐÐ¹É·ÝÓÐÏÞ¹«Ë¾	2020-04-03	2020-06-19	CN111309541A	Ö÷·ÖÀàºÅ£ºG06F11/22(20060101)	ÔÚÉó-¹«¿ª	518000 ¹ã¶«Ê¡ÉîÛÚÊÐÇ°º£Éî¸ÛºÏ×÷ÇøÇ°ÍåÒ»Â·1ºÅA¶°201ÊÒ(Èë×¤ÉîÛÚÊÐÇ°º£ÉÌÎñÃØÊéÓÐÏÞ¹«Ë¾)	±¾·¢Ã÷Éæ¼°½ðÈÚ¿Æ¼¼(Fintech)¼¼ÊõÁìÓò£¬²¢¹«¿ªÁËÒ»ÖÖÒì³£´¦Àí¼ì²â·½·¨£¬¸Ã·½·¨°üÀ¨£º»ñÈ¡Ä¿±êÂß¼­¶ÔÓ¦µÄÔ¤ÉèÅäÖÃ±íºÍÊäÈë²ÎÊý£¬²¢¸ù¾ÝËùÊöÔ¤ÉèÅäÖÃ±íºÍËùÊöÊäÈë²ÎÊý¼ì²âËùÊöÄ¿±êÂß¼­ÊÇ·ñÂú×ãÔ¤Éè¼ì²âÌõ¼þ£»ÈôÂú×ã£¬Ôò¼ì²âËùÊöÔ¤ÉèÅäÖÃ±íÖÐµÄÒì³£ÀàÊÇ·ñ´æÔÚÒì³£ÅäÖÃ£»Èô´æÔÚÒì³£ÅäÖÃ£¬Ôò»ùÓÚËùÊöÒì³£ÅäÖÃ¹¹½¨Òì³£³¡¾°£¬¸ù¾ÝËùÊöÒì³£³¡¾°»ñÈ¡ËùÊöÄ¿±êÂß¼­¶ÔÓ¦µÄÄ¿±êÒì³££¬²¢Êä³öËùÊöÄ¿±êÒì³£¡£±¾·¢Ã÷»¹¹«¿ªÁËÒ»ÖÖÒì³£´¦Àí¼ì²â×°ÖÃ¡¢…	Êý¾Ý·ÖÎö
Èí¼þ¿ª·¢·½·¨¼°Èí¼þ¿ª·¢ÏµÍ³	ÖÐÓÊÏû·Ñ½ðÈÚÓÐÏÞ¹«Ë¾	2020-04-03	2020-05-12	CN111142855A	Ö÷·ÖÀàºÅ£ºG06F8/20(20180101)	ÔÚÉó-¹«¿ª	511458 ¹ã¶«Ê¡¹ãÖÝÊÐÄÏÉ³Çøº£±õÂ·171ºÅÄÏÉ³½ðÈÚ´óÏÃ11Â¥1101Ö®Ò»J30	±¾·¢Ã÷Éæ¼°Ò»ÖÖÈí¼þ¿ª·¢·½·¨¼°Èí¼þ¿ª·¢ÏµÍ³£¬¸ÃÈí¼þ¿ª·¢·½·¨°üÀ¨ÈçÏÂ²½Öè£ºS1£º»ñÈ¡×é¼þ¿âÐÅÏ¢£¬Ê¹ÓÃÕß¸ù¾ÝÄ¿±êÈí¼þµÄÐèÇó£¬µ÷ÓÃ×é¼þ£»S2£ºÔÚ×é¼þ¿âÖÐ²éÑ¯ÓëÄ¿±êÈí¼þÏàÆ¥ÅäµÄ×é¼þ£»ÈôÄ¿±êÈí¼þËùÐè×é¼þ±»ÍêÈ«Æ¥Åä£¬ÔòÐÎ³ÉÄ¿±êÈí¼þÄ£ÐÍ£»ÈôÄ¿±êÈí¼þËùÐèÒµÎñ×é¼þÎÞ·¨±»ÍêÈ«Æ¥Åä£¬Ôò½øÐÐS3²½Öè£»S3£º½ÓÊÕÐÂÔö×é¼þµÄÐÅÏ¢£¬ÔÚ×é¼þ¿âÖÐÔö¼ÓÐÂµÄ×é¼þ£¬ÐÎ³ÉÄ¿±êÈí¼þÄ£ÐÍ£»S4£º½ÓÊÕ²ÎÊýÒò×Ó¼°Óë²ÎÊýÒò×Ó¶ÔÓ¦×é¼þµÄÓ³Éä¼°ÃèÊö£»S5:½ÓÊÕ²âÊÔÃü…	½è´û
Ö§¸¶ÒµÎñµÄÇø¿éÁ´Ó¦ÓÃÏµÍ³¡¢·½·¨¼°×°ÖÃ	ÒøÇå¿Æ¼¼ÓÐÏÞ¹«Ë¾	2020-04-03	2020-07-28	CN111459825A	Ö÷·ÖÀàºÅ£ºG06F11/36(20060101)	ÔÚÉó-¹«¿ª	100195 ±±¾©ÊÐº£µíÇø±±Îë´åÂ·23ºÅ±±Îë´´ÐÂÔ°ÄÏÇø3ºÅÂ¥Ò»²ã112-113	±¾·¢Ã÷¹«¿ªÁËÒ»ÖÖÖ§¸¶ÒµÎñµÄÇø¿éÁ´Ó¦ÓÃÏµÍ³¡¢·½·¨¼°×°ÖÃ£¬¸ÃÏµÍ³°üÀ¨£ºÇø¿éÁ´ÍøÂç¡¢Çø¿éÁ´¿Í»§¶ËºÍÖ§¸¶ÒµÎñÏµÍ³½ÓÈëÄ£¿é£»ÆäÖÐ£¬Ö§¸¶ÒµÎñÏµÍ³½ÓÈëÄ£¿é£¬ÓÃÓÚ¶Ô½ÓÖ§¸¶ÒµÎñÏµÍ³µÄ¿ª·¢/²âÊÔ»·¾³£¬ºÍ/»òÄ£ÄâÖ§¸¶ÒµÎñÏµÍ³µÄÖ§¸¶ÒµÎñ£»Çø¿éÁ´¿Í»§¶Ë£¬·Ö±ðÓëÖ§¸¶ÒµÎñÏµÍ³½ÓÈëÄ£¿éºÍÇø¿éÁ´ÍøÂçÍ¨ÐÅ£¬ÓÃÓÚ½«Ö§¸¶ÒµÎñÏµÍ³µÄÖ§¸¶ÒµÎñÊý¾ÝÍ¬²½µ½Çø¿éÁ´ÍøÂç£¬»ò½«Çø¿éÁ´ÍøÂçÉÏµÄÖ§¸¶ÒµÎñÊý¾ÝÍÆËÍµ½Ö§¸¶ÒµÎñÏµÍ³¡£±¾·¢Ã÷ÄÜ¹»¿ìËÙÑéÖ¤Çø¿éÁ´ÔÚ¸÷Ö…	Ö§¸¶
Ò»ÖÖÄ£ÄâÖ§¸¶µÄ·½·¨¡¢ÏµÍ³¼°×°ÖÃ	ÍøÒ×£¨º¼ÖÝ£©ÍøÂçÓÐÏÞ¹«Ë¾	2020-04-08	2020-07-24	CN111444105A	Ö÷·ÖÀàºÅ£ºG06F11/36(20060101)	ÔÚÉó-¹«¿ª	310052 Õã½­Ê¡º¼ÖÝÊÐ±õ½­Çø³¤ºÓ½ÖµÀÍøÉÌÂ·599ºÅ4´±7²ã	±¾·¢Ã÷ÊµÊ©ÀýÌá¹©ÁËÒ»ÖÖÄ£ÄâÖ§¸¶µÄ·½·¨¡¢ÏµÍ³¼°×°ÖÃ£¬°üÀ¨£º½ÓÊÕÈí¼þ¿Í»§¶Ë·¢ËÍµÄÖ§¸¶ÇëÇó£»¸ù¾ÝËùÊöÖ§¸¶ÇëÇóÉú³É³É¹¦ÐÅÏ¢»òÊ§°ÜÐÅÏ¢£»½«ËùÊö³É¹¦ÐÅÏ¢·¢ËÍÖÁÄ¿±êÈí¼þ·þÎñÆ÷£¬ÓÉËùÊöÄ¿±êÈí¼þ·þÎñÆ÷´¦ÀíËùÊö³É¹¦ÐÅÏ¢µÃµ½Í¨ÖªÐÅÏ¢£¬²¢½«ËùÊöÍ¨ÖªÐÅÏ¢·¢ËÍÖÁËùÊöÈí¼þ¿Í»§¶Ë£»»ò£¬½«ËùÊöÊ§°ÜÐÅÏ¢·¢ËÍÖÁËùÊöÈí¼þ¿Í»§¶Ë¡£Í¨¹ý²ÉÓÃÄ£ÄâÖ§¸¶ÍøÕ¾ÊµÏÖ¼Æ·ÑÏµÍ³ÓëÖ§¸¶ÇþµÀÔÚÈí¼þÖ§¸¶Á÷³ÌÖÐµÄ¹¦ÄÜ£¬ÓëÈí¼þ¿Í»§¶ËºÍÈí¼þ·þÎñÆ÷½øÐÐ½»»¥£¬·½±ãµØÈÃ²…	Ö§¸¶
Êý¾ÝÒ»ÖÂÐÔµÄÊµÏÖ·½·¨¡¢×°ÖÃ¡¢Éè±¸¼°¼ÆËã»ú´æ´¢½éÖÊ	ÉîÛÚÇ°º£Î¢ÖÚÒøÐÐ¹É·ÝÓÐÏÞ¹«Ë¾	2020-04-16	2020-08-04	CN111488367A	Ö÷·ÖÀàºÅ£ºG06F16/23(20190101)	ÔÚÉó-¹«¿ª	518000 ¹ã¶«Ê¡ÉîÛÚÊÐÇ°º£Éî¸ÛºÏ×÷ÇøÇ°ÍåÒ»Â·1ºÅA¶°201ÊÒ(Èë×¤ÉîÛÚÊÐÇ°º£ÉÌÎñÃØÊéÓÐÏÞ¹«Ë¾)	±¾·¢Ã÷Éæ¼°½ðÈÚ¿Æ¼¼¼¼ÊõÁìÓò£¬¹«¿ªÁËÒ»ÖÖÊý¾ÝÒ»ÖÂÐÔµÄÊµÏÖ·½·¨¡¢×°ÖÃ¡¢Éè±¸¼°¼ÆËã»ú´æ´¢½éÖÊ¡£¸Ã·½·¨°üÀ¨£ºÔÚ½ÓÊÕµ½ÊÂÎñ¿ªÆôÖ¸ÁîÊ±£¬µ÷ÓÃÔ¤ÉèAPIÉú³ÉÊÂÎïÉÏÏÂÎÄ£»ÔÚ½ÓÊÕµ½Êý¾ÝÐ´ÈëÃüÁîÊ±£¬µ÷ÓÃÔ¤ÉèAPIÉú³É¶ÔÓ¦µÄÕýÏòÊÂÎñÔªËØºÍ·´ÏòÊÂÎñÔªËØ£¬²¢»º´æÖÁÊÂÎñÉÏÏÂÎÄÖÐ£»ÔÚ½ÓÊÕµ½ÊÂÎñÌá½»Ö¸ÁîÊ±£¬½«ÊÂÎñÉÏÏÂÎÄÖÐ»º´æµÄÕýÏòÊÂÎñÔªËØ·â×°ÎªRedisÊÂÎñ£¬²¢ÏòÖ÷½ÚµãÌá½»Ö´ÐÐRedisÊÂÎñ£»ÔÚÖ´ÐÐÍê³ÉÊ±£¬µ÷ÓÃÔ¤ÉèWAITÃüÁî£¬ÒÔÈ·¶¨RedisÊÂÎñ¶ÔÓ¦…	Êý¾Ý·ÖÎö
Ò»ÖÖÈÕÖ¾Êý¾Ý´¦Àí·½·¨¼°×°ÖÃ	ÉîÛÚÇ°º£Î¢ÖÚÒøÐÐ¹É·ÝÓÐÏÞ¹«Ë¾	2020-04-20	2020-08-07	CN111506479A	Ö÷·ÖÀàºÅ£ºG06F11/30(20060101)	ÔÚÉó-¹«¿ª	518027 ¹ã¶«Ê¡ÉîÛÚÊÐÇ°º£Éî¸ÛºÏ×÷ÇøÇ°ÍåÒ»Â·1ºÅA¶°201ÊÒ	±¾·¢Ã÷Éæ¼°½ðÈÚ¿Æ¼¼¼¼ÊõÁìÓò£¬ÓÈÆäÉæ¼°Ò»ÖÖÈÕÖ¾Êý¾Ý´¦Àí·½·¨¼°×°ÖÃ£¬¸Ã·½·¨Ó¦ÓÃÓÚ´¦ÀíÆ÷¼¯ÈºÖÐµÄÈÎÒâÒ»¸ö´¦ÀíÆ÷£¬°üÀ¨£º¸ù¾ÝÅäÖÃÏî½«½ÓÊÕµÄÈÕÖ¾Êý¾Ý·Ö·¢µ½¸Ã´¦ÀíÆ÷ÉÏµÄM¸ö´¦ÀíÊµÀý£¬ÆäÖÐÅäÖÃÏî°üÀ¨Êý¾ÝµÄÖØÒªµÈ¼¶¡¢Ê±ÑÓÐèÇó´óÐ¡ºÍ´¦ÀíÊµÀýµÄ¸ºÔØ´óÐ¡¡£Õë¶ÔÈÎÒ»´¦ÀíÊµÀý£º¸ù¾ÝÈÕÖ¾Êý¾ÝµÄÊý¾ÝÊôÐÔ½«ÈÕÖ¾Êý¾ÝÇÐ·ÖÎªN¸öÈÕÖ¾Êý¾Ý±í¡£¸ù¾ÝÔ¤ÉèÅäÖÃ±íÖÐ¶ÔÓ¦Ö¸±êµÄÉ¸Ñ¡¹«Ê½£¬¶ÔÈÕÖ¾Êý¾Ý±íÖÐµÄÈÕÖ¾Êý¾Ý½øÐÐ±ê¼ÇºÍ·ÖÀà£¬È·¶¨Ö¸±êÊý¾Ý£¬°üÀ¨È…	Êý¾Ý·ÖÎö
Ò»ÖÖÖ§¸¶±ê¼Ç»¯Ó¦ÓÃµÄ²âÊÔÏµÍ³¼°·½·¨	ÖÐ¹úÒøÐÐ¹É·ÝÓÐÏÞ¹«Ë¾	2020-04-27	2020-08-14	CN111538664A	Ö÷·ÖÀàºÅ£ºG06F11/36(20060101)	ÔÚÉó-¹«¿ª	100818 ±±¾©ÊÐÎ÷³ÇÇø¸´ÐËÃÅÄÚ´ó½Ö1ºÅ	±¾ÉêÇëÌá¹©ÁËÒ»ÖÖÖ§¸¶±ê¼Ç»¯Ó¦ÓÃµÄ²âÊÔÏµÍ³£¬°üÀ¨£ºÒøÐÐÏµÍ³ºÍÒøÁªÏµÍ³£¬ÆäÖÐ£¬ËùÊöÒøÁªÏµÍ³ÔÚ±¾µØÄ£ÄâµÃµ½£»ËùÊöÒøÐÐÏµÍ³£¬ÓÃÓÚ½ÓÊÕËùÊöÖ§¸¶±ê¼Ç»¯Ó¦ÓÃ·¢ËÍµÄµÚÒ»²âÊÔÇëÇó£¬²¢ÏòËùÊöÒøÁªÏµÍ³·¢ËÍËùÊöµÚÒ»²âÊÔÇëÇó£¬ËùÊöÒøÁªÏµÍ³£¬ÓÃÓÚÏìÓ¦ÓÚËùÊöµÚÒ»²âÊÔÇëÇó£¬¶ÔËùÊö²âÊÔÇëÇóÖÐµÄÊý¾Ý½øÐÐ´¦Àí£¬µÃµ½µÚÒ»´¦Àí½á¹û£¬²¢ÏòËùÊöÖ§¸¶±ê¼Ç»¯Ó¦ÓÃ·µ»ØËùÊöµÚÒ»´¦Àí½á¹û¡£Èç´Ë£¬±ÜÃâÁËÓëÍâ²¿ÏµÍ³Ð­µ÷£¬Ìá¸ßÁË²âÊÔÐ§ÂÊ£¬½µµÍÁË²âÊÔ³É±¾¡£	Ö§¸¶
±£ÏÕÒµÎñÈÝÁ¿µÄ¹ÜÀí·½·¨¡¢×°ÖÃ¡¢µç×ÓÉè±¸¼°´æ´¢½éÖÊ	Ì©¿µ±£ÏÕ¼¯ÍÅ¹É·ÝÓÐÏÞ¹«Ë¾	2020-05-26	2020-09-04	CN111625436A	Ö÷·ÖÀàºÅ£ºG06F11/34(20060101)	ÔÚÉó-¹«¿ª	100031 ±±¾©ÊÐÎ÷³ÇÇø¸´ÐËÃÅÄÚ´ó½Ö156ºÅÌ©¿µÈËÊÙ´óÏÃ	±¾ÊµÊ©ÀýÌá¹©µÄ±£ÏÕÒµÎñÈÝÁ¿µÄ¹ÜÀí·½·¨¡¢×°ÖÃ¡¢µç×ÓÉè±¸¼°´æ´¢½éÖÊ£¬Í¨¹ý²É¼¯±£ÏÕÒµÎñµÄÊý¾Ý£¬²¢¸ù¾ÝËùÊöÊý¾ÝÈ·¶¨ÔÚ²»Í¬±£ÏÕÒµÎñµÄÏµÍ³·þÎñµÈ¼¶£»ÔÚ¸÷²âÊÔ»·¾³ÏÂ¶Ô¸÷±£ÏÕÒµÎñÏµÍ³µÄ½Úµã½øÐÐÑ¹Á¦²âÊÔ£¬»ñµÃÑ¹²âÊý¾Ý£»½¨Á¢²»Í¬±£ÏÕÒµÎñµÄÏµÍ³·þÎñµÈ¼¶Óë¸÷²âÊÔ»·¾³ÏÂµÄÑ¹²âÊý¾ÝÖ®¼äµÄ¹ØÁª¹ØÏµ£»ÀûÓÃËùÊö¹ØÁª¹ØÏµ¶Ô±£ÏÕÒµÎñÈÝÁ¿½øÐÐÆÀ¹À£¬´Ó¶ø¿ÉÒÔ½áºÏ±£ÏÕÒµÎñ×ÔÉí£¬¶ÔÓÚÏµÍ³ÐÔÄÜ½øÐÐ¾«×¼ÆÀ¹ÀÇÒ£¬²¢Óë¸ù¾ÝÆÀ¹À½á¹û¶ÔÓÚ±£ÏÕÒµÎñ½øÐÐµ÷Õ…	±£ÏÕ
²âÊÔ·½·¨¡¢×°ÖÃ¡¢Éè±¸¼°¼ÆËã»ú´æ´¢½éÖÊ	ÉîÛÚÇ°º£Î¢ÖÚÒøÐÐ¹É·ÝÓÐÏÞ¹«Ë¾	2020-06-03	2020-09-08	CN111639034A	Ö÷·ÖÀàºÅ£ºG06F11/36(20060101)	ÔÚÉó-¹«¿ª	518000 ¹ã¶«Ê¡ÉîÛÚÊÐÇ°º£Éî¸ÛºÏ×÷ÇøÇ°ÍåÒ»Â·1ºÅA¶°201ÊÒ(Èë×¤ÉîÛÚÊÐÇ°º£ÉÌÎñÃØÊéÓÐÏÞ¹«Ë¾)	±¾·¢Ã÷Éæ¼°½ðÈÚ¿Æ¼¼(Fintech)¼¼ÊõÁìÓò£¬²¢¹«¿ªÁËÒ»ÖÖ²âÊÔ·½·¨£¬¸Ã·½·¨°üÀ¨£º¸ù¾ÝÊäÈëµÄÒµÎñ³¡¾°ÀàÐÍÈ·¶¨Êý¾ÝÊäÈëÔ´£¬²¢¸ù¾ÝÊý¾ÝÊäÈëÔ´ÔÚÖªÊ¶Í¼Æ×µÄÎ´ÑµÁ·±êÇ©ÐÅÏ¢ÖÐ»ñÈ¡µÚÒ»Ô¤ÉèÊýÁ¿µÄÄ¿±ê±êÇ©ÐÅÏ¢£»»ñÈ¡¸÷Ä¿±ê±êÇ©ÐÅÏ¢¶ÔÓ¦µÄÆÀ¹ÀÖ¸±ê£¬²¢»ñÈ¡¸÷ÆÀ¹ÀÖ¸±ê¶ÔÓ¦µÄÖ¸±êÓ°ÏìÒò×Ó£»¸ù¾Ý¸÷ÆÀ¹ÀÖ¸±êºÍ¸÷Ö¸±êÓ°ÏìÒò×Ó¼ÆËã¸÷Ä¿±ê±êÇ©ÐÅÏ¢¶ÔÓ¦µÄ½á¹ûÈ¨ÖØÖµ£¬²¢¸ù¾Ý¸÷½á¹ûÈ¨ÖØÖµ¶Ô¸÷Ä¿±ê±êÇ©ÐÅÏ¢¶ÔÓ¦µÄÍÆ¼ö·ÖÊýÖµ½øÐÐÐ£Õý£»»ùÓÚÐ£ÕýºóµÄ¸÷ÍÆ¼ö…	Êý¾Ý·ÖÎö
Áªµ÷²âÊÔ·½·¨¼°×°ÖÃ	±´¿Ç¼¼ÊõÓÐÏÞ¹«Ë¾	2020-06-04	2020-10-27	CN111831550A	Ö÷·ÖÀàºÅ£ºG06F11/36(20060101)	ÔÚÉó-¹«¿ª	300457 Ìì½òÊÐ±õº£ÐÂÇø¾­¼Ã¼¼Êõ¿ª·¢ÇøÄÏ¸Û¹¤ÒµÇø×ÛºÏ·þÎñÇø°ì¹«Â¥C×ùÒ»²ã112ÊÒ05µ¥Ôª	±¾·¢Ã÷ÊµÊ©ÀýÌá¹©ÁËÒ»ÖÖÁªµ÷²âÊÔ·½·¨¼°×°ÖÃ£¬ËùÊö·½·¨Ê×ÏÈ»ñÈ¡´û¿îÒµÎñÉêÇëËùÐèµÄ¹Ø¼üÐÅÏ¢£¬ËùÊö¹Ø¼üÐÅÏ¢°üÀ¨´û¿îÒµÎñÉêÇë¶ÔÓ¦µÄÒøÐÐµÄ×ÜÐÐÃû³ÆÒÔ¼°ÉêÇëÀàÐÍ£»È»ºó¸ù¾ÝÒøÐÐµÄ×ÜÐÐÃû³Æ£¬È·¶¨ÒøÐÐµÄ×ÜÐÐ´úºÅ£¬²¢¸ù¾Ý×ÜÐÐ´úºÅºÍÉêÇëÀàÐÍ£¬È·¶¨mock±¨ÎÄ£»Í¨¹ýµ÷ÓÃ´û¿î·þÎñÏµÍ³µÄ±£´æ½Ó¿Ú£¬¶Ômock±¨ÎÄ½øÐÐ±£´æ£»Éú³É´û¿îÒµÎñÉêÇëµÄ¹ØÁªÁ´½Ó£¬²¢ÔÚ¹ØÁªÁ´½Ó±»´¥·¢Ê±×Ô¶¯¼ÓÔØmock±¨ÎÄÖÐµÄÉêÇëÐÅÏ¢¡£Õû¸ö¹ý³ÌÖÐ¾ùÍ¨¹ýÏµÍ³×Ô¶¯ÊµÏÖ£¬²¢²»ÐèÒ…	½è´û
Ò»ÖÖÊý¾Ý¿âµÄÒì³£¼ì²â·½·¨¼°×°ÖÃ	ÉîÛÚÇ°º£Î¢ÖÚÒøÐÐ¹É·ÝÓÐÏÞ¹«Ë¾	2020-06-15	2020-09-22	CN111694815A	Ö÷·ÖÀàºÅ£ºG06F16/21(20190101)	ÔÚÉó-¹«¿ª	518027 ¹ã¶«Ê¡ÉîÛÚÊÐÇ°º£Éî¸ÛºÏ×÷ÇøÇ°ÍåÒ»Â·1ºÅA¶°201ÊÒ	±¾·¢Ã÷¹«¿ªÁËÒ»ÖÖÊý¾Ý¿âµÄÒì³£¼ì²â·½·¨¼°×°ÖÃ£¬ÆäÖÐ·½·¨Îª£º»ñÈ¡Êý¾Ý¿âµÄ´ý¼ì²âÊý¾Ý¼ÇÂ¼£»ÈôËùÊö´ý¼ì²âÊý¾Ý¼ÇÂ¼ÖÐ¿ÉÃ¶¾ÙÐÍÊý¾ÝµÄÃ¶¾ÙÖµµÄÊý¾ÝÁ¿±íÕ÷Öµ²»Î»ÓÚÊý¾ÝÁ¿²¨¶¯Çø¼ä£¬ÔòÈ·¶¨ËùÊöÊý¾Ý¿â´æÔÚÒì³££»ºÍ/»òÈôËùÊö´ý¼ì²âÊý¾Ý¼ÇÂ¼ÖÐ·¶Î§ÐÍÊý¾ÝµÄÊý¾ÝÈ¡Öµ±íÕ÷Öµ²»Î»ÓÚÊý¾ÝÈ¡Öµ²¨¶¯Çø¼ä£¬ÔòÈ·¶¨ËùÊöÊý¾Ý¿â´æÔÚÒì³£¡£ÉÏÊö·½·¨Ó¦ÓÃÓÚ½ðÈÚ¿Æ¼¼(Fintech)Ê±£¬»ñÈ¡´ý²âÊý¾Ý±íÖÐµÄ´ý¼ì²âÊý¾Ý¼ÇÂ¼ºó£¬¿ÉÓÃ¸ù¾ÝÊý¾ÝÁ¿±íÕ÷Öµ¡¢Êý¾ÝÈ¡Öµ±íÕ÷ÖµÓ…	Êý¾Ý·ÖÎö
²âÊÔ°¸Àý¼¯Éú³É·½·¨¡¢×°ÖÃ¡¢Éè±¸¼°¼ÆËã»ú¿É¶Á´æ´¢½éÖÊ	ÉîÛÚÇ°º£Î¢ÖÚÒøÐÐ¹É·ÝÓÐÏÞ¹«Ë¾	2020-06-18	2020-09-25	CN111708703A	Ö÷·ÖÀàºÅ£ºG06F11/36(20060101)	ÔÚÉó-¹«¿ª	518000 ¹ã¶«Ê¡ÉîÛÚÊÐÇ°º£Éî¸ÛºÏ×÷ÇøÇ°ÍåÒ»Â·1ºÅA¶°201ÊÒ(Èë×¤ÉîÛÚÊÐÇ°º£ÉÌÎñÃØÊéÓÐÏÞ¹«Ë¾)	±¾·¢Ã÷Éæ¼°½ðÈÚ¿Æ¼¼¼¼ÊõÁìÓò£¬¹«¿ªÁËÒ»ÖÖ²âÊÔ°¸Àý¼¯Éú³É·½·¨¡¢×°ÖÃ¡¢Éè±¸¼°¼ÆËã»ú¿É¶Á´æ´¢½éÖÊ¡£¸Ã²âÊÔ°¸Àý¼¯Éú³É·½·¨°üÀ¨£º»ñÈ¡°¸Àý¹Ø¼ü´Ê£¬¶Ô°¸Àý¹Ø¼ü´Ê½øÐÐÓïÒå·ÖÎö£¬µÃµ½ÓïÒå·ÖÎö½á¹û£»¸ù¾ÝÓïÒå·ÖÎö½á¹û£¬¼ìË÷²âÊÔ°¸Àý¼¯ÖªÊ¶¿âÒÔ»ñÈ¡¼ìË÷½á¹û£¬ÆäÖÐ£¬²âÊÔ°¸Àý¼¯ÖªÊ¶¿âÊÇÓÉBERTÄ£ÐÍ½áºÏÖªÊ¶Í¼Æ×¹¹½¨µÃµ½µÄÔ¤ÉèÑµÁ·Ä£ÐÍÑµÁ·Éú³ÉµÄ£»Èô¸ù¾Ý¼ìË÷½á¹ûÅÐ¶¨²âÊÔ°¸Àý¼¯ÖªÊ¶¿âÖÐ´æÔÚÏàËÆ°¸Àý¼¯£¬Ôò»ñÈ¡Ä¿±êÏàËÆ°¸Àý¼¯£»ÀûÓÃÖªÊ¶Í¼Æ×¶Ô°…	Êý¾Ý·ÖÎö
Ò»ÖÖ·Ç½ðÈÚ½»Ò×µÄ²âÊÔ¹¤¾ß	ÉÏº£Í¨Áª½ðÈÚ·þÎñÓÐÏÞ¹«Ë¾	2020-06-22	2020-09-25	CN111708710A	Ö÷·ÖÀàºÅ£ºG06F11/36(20060101)	ÔÚÉó-¹«¿ª	200437 ÉÏº£ÊÐºç¿ÚÇøãëË®¶«Â·351ºÅ1ºÅÂ¥2²ã276ÊÒ	±¾ÉêÇë¹«¿ªÁËÒ»ÖÖ·Ç½ðÈÚ½»Ò×µÄ²âÊÔ¹¤¾ß£¬Æä²âÊÔÁ÷³ÌÎª£ºÑ¡ÖÐÐèÒª²âÊÔµÄ±¨ÎÄÄ£¿é£»ÔÚ¶ÔÓ¦µÄ±¨ÎÄÄ£°åÖÐ£¬ÊäÈë²âÊÔµÄÊý¾Ý£»·¢ËÍ²âÊÔ±¨ÎÄ£¬ÈçÕýÈ·£¬»ñÈ¡·µ»Ø±¨ÎÄÐÅÏ¢£¬½»Ò×³É¹¦£»Èç´íÎó£¬Ôò·µ»Ø´íÎóÐÅÏ¢¡£Õë¶Ô·Ç½ðÈÚ½»Ò×µÄ´úÂë½øÐÐÐÞ¸ÄµÄÇéÐÎ£¬±¾ÉêÇëÌá¹©ÁËÒ»ÖÖ²âÊÔ¹¤¾ß£¬¿É¶Ô±¾µØÓëÐÐ·½µÄ½»»¥½øÐÐ²âÊÔ¡£	Êý¾Ý·ÖÎö
¸æ¾¯Êý¾Ý´¦Àí·½·¨¡¢×°ÖÃ¡¢Éè±¸¼°¼ÆËã»ú´æ´¢½éÖÊ	ÉîÛÚÇ°º£Î¢ÖÚÒøÐÐ¹É·ÝÓÐÏÞ¹«Ë¾	2020-06-23	2020-09-29	CN111722984A	Ö÷·ÖÀàºÅ£ºG06F11/30(20060101)	ÔÚÉó-¹«¿ª	518000 ¹ã¶«Ê¡ÉîÛÚÊÐÇ°º£Éî¸ÛºÏ×÷ÇøÇ°ÍåÒ»Â·1ºÅA¶°201ÊÒ(Èë×¤ÉîÛÚÊÐÇ°º£ÉÌÎñÃØÊéÓÐÏÞ¹«Ë¾)	±¾·¢Ã÷Éæ¼°½ðÈÚ¿Æ¼¼(Fintech)¼¼ÊõÁìÓò£¬²¢¹«¿ªÁËÒ»ÖÖ¸æ¾¯Êý¾Ý´¦Àí·½·¨£¬¸Ã·½·¨°üÀ¨£º»ùÓÚÇåÏ´ºóµÄ¸æ¾¯Êý¾Ý¹¹½¨Æµ·±Ä£Ê½Ê÷£¬¸ù¾ÝËùÊöÆµ·±Ä£Ê½Ê÷¶ÔÓ¦µÄ¹ØÁª¹æÔòÔÚËùÊö¸æ¾¯Êý¾ÝÖÐ»ñÈ¡ÊÕÁ²¸æ¾¯Êý¾Ý£¬²¢»ñÈ¡ËùÊöÊÕÁ²¸æ¾¯Êý¾Ý¶ÔÓ¦µÄ¸æ¾¯¹ØÁª·½µÄ¹ØÁª¸æ¾¯Êý¾Ý£»½«ËùÊöÊÕÁ²¸æ¾¯Êý¾ÝºÍËùÊö¹ØÁª¸æ¾¯Êý¾Ý½øÐÐºÏ²¢´¦Àí£¬ÒÔ»ñÈ¡Ä¿±ê¸æ¾¯Êý¾Ý£¬²¢¼ì²âËùÊöÄ¿±ê¸æ¾¯Êý¾ÝÊÇ·ñºÍÔ¤ÉèµÄ¸æ¾¯´¦Àí¹æÔòÆ¥Åä£»ÈôÆ¥Åä£¬Ôò¸ù¾ÝËùÊö¸æ¾¯´¦Àí¹æÔò¶ÔËùÊöÄ¿±ê¸æ…	Êý¾Ý·ÖÎö
½Ó¿Ú×Ô¶¯»¯²âÊÔ·½·¨¡¢×°ÖÃ¡¢Éè±¸¼°¼ÆËã»ú¿É¶Á´æ´¢½éÖÊ	ÉîÛÚÇ°º£Î¢ÖÚÒøÐÐ¹É·ÝÓÐÏÞ¹«Ë¾	2020-06-28	2020-10-02	CN111737140A	Ö÷·ÖÀàºÅ£ºG06F11/36(20060101)	ÔÚÉó-¹«¿ª	518000 ¹ã¶«Ê¡ÉîÛÚÊÐÇ°º£Éî¸ÛºÏ×÷ÇøÇ°ÍåÒ»Â·1ºÅA¶°201ÊÒ(Èë×¤ÉîÛÚÊÐÇ°º£ÉÌÎñÃØÊéÓÐÏÞ¹«Ë¾)	±¾·¢Ã÷Éæ¼°½ðÈÚ¿Æ¼¼(Fintech)¼¼ÊõÁìÓò£¬±¾·¢Ã÷¹«¿ªÁËÒ»ÖÖ½Ó¿Ú×Ô¶¯»¯²âÊÔ·½·¨¡¢×°ÖÃ¡¢Éè±¸ºÍ¼ÆËã»ú¿É¶Á´æ´¢½éÖÊ£¬¸Ã·½·¨°üÀ¨£ºÔÚ½ÓÊÕµ½½Ó¿ÚÐ­Òé²âÊÔÇëÇóÊ±£¬»ñÈ¡ËùÊö½Ó¿ÚÐ­Òé²âÊÔÇëÇó¶ÔÓ¦´ý²âÊÔµÄÄ¿±ê°æ±¾Ð­Òé£»Èô´æÔÚÓëËùÊöÄ¿±ê°æ±¾Ð­Òé¹ØÁªµÄ»ùÏß°æ±¾Ð­Òé£¬Ôò±È¶ÔËùÊöÄ¿±ê°æ±¾Ð­ÒéÓëËùÊö»ùÏß°æ±¾Ð­Òé£¬»ñµÃÐ­Òé¸üÐÂÐÅÏ¢£»»ñÈ¡ËùÊö»ùÏß°æ±¾Ð­Òé¶ÔÓ¦µÄ»ùÏß²âÊÔÒýÇæ£¬¸ù¾ÝËùÊöÐ­Òé¸üÐÂÐÅÏ¢¸üÐÂËùÊö»ùÏß²âÊÔÒýÇæ£¬»ñµÃÄ¿±ê²âÊÔÒýÇæ£»…	Êý¾Ý·ÖÎö
ÒøÐÐÅúÁ¿³ÌÐò¹ÊÕÏ´¦Àí·½·¨¼°×°ÖÃ	ÖÐ¹úÒøÐÐ¹É·ÝÓÐÏÞ¹«Ë¾	2020-06-28	2020-10-09	CN111752842A	Ö÷·ÖÀàºÅ£ºG06F11/36(20060101)	ÔÚÉó-¹«¿ª	100818 ±±¾©ÊÐÎ÷³ÇÇø¸´ÐËÃÅÄÚ´ó½Ö1ºÅ	±¾·¢Ã÷¹«¿ªÁËÒ»ÖÖÒøÐÐÅúÁ¿³ÌÐò¹ÊÕÏ´¦Àí·½·¨¼°×°ÖÃ£¬ÆäÖÐ·½·¨°üÀ¨£º»ñµÃÅúÁ¿³ÌÐòÐÅÏ¢ºÍ¶ÔÓ¦µÄÅÅÐò¹æÔòÐÅÏ¢£¬ËùÊöÅúÁ¿³ÌÐòÐÅÏ¢°üÀ¨£ºÐø×ö±êÇ©£»¸ù¾ÝËùÊöÅÅÐò¹æÔòÐÅÏ¢£¬¶ÔÅúÁ¿³ÌÐòÖÐµÄÊý¾Ý½øÐÐÅÅÐò£¬È·¶¨ÅÅÐòºóµÄÆðÊ¼¼üÖµ£»´ÓËùÊöÆðÊ¼¼üÖµ¿ªÊ¼°´Ðò¶ÔÅúÁ¿³ÌÐòÖÐµÄÊý¾Ý½øÐÐ´¦Àí£¬¸ù¾Ý´¦ÀíµÄÊý¾ÝÁ¿¸üÐÂÓÎ±ê¼ÆÊýÖµ£»µ±ËùÊöÓÎ±ê¼ÆÊýÖµ³¬¹ýÔ¤ÉèãÐÖµÊ±£¬¸ù¾ÝËùÊöÐø×ö±êÇ©£¬ÅÅÐò¹æÔòÐÅÏ¢£¬ÆðÊ¼¼üÖµºÍÓÎ±ê¼ÆÊýÖµ£¬¸üÐÂËùÊöÆðÊ¼¼üÖµ£»¸ù¾Ý¸üÐÂº…	Êý¾Ý·ÖÎö
Ò»ÖÖ¿çÏµÍ³µÄ½ðÈÚ×ÔÖúÉè±¸SP×Ô¶¯²âÊÔ·½·¨¡¢Éè±¸¼°½éÖÊ	ÖÐµç³¤³Ç£¨³¤É³£©ÐÅÏ¢¼¼ÊõÓÐÏÞ¹«Ë¾	2020-06-28	2020-10-09	CN111752840A	Ö÷·ÖÀàºÅ£ºG06F11/36(20060101)	ÔÚÉó-¹«¿ª	410205 ºþÄÏÊ¡³¤É³ÊÐ³¤É³¸ßÐÂ¿ª·¢Çø¼âÉ½Â·39ºÅ³¤É³ÖÐµçÈí¼þÔ°Ò»ÆÚ17ºÅ¶°	±¾·¢Ã÷¹«¿ªÁËÒ»ÖÖ¿çÏµÍ³µÄ½ðÈÚ×ÔÖúÉè±¸SP×Ô¶¯²âÊÔ·½·¨¡¢Éè±¸¼°½éÖÊ£¬ÆäÖÐ·½·¨Îª£º²âÊÔ¹¤¾ßÉú³É»ùÓÚJSON¶ÔÏóµÄ²âÊÔÖ¸Áî£»×ª»»Ä£¿é½«»ùÓÚJSON¶ÔÏóµÄ²âÊÔÖ¸Áî×ª»»Îª»ùÓÚCEN/XFS½á¹¹ÌåµÄ²âÊÔÖ¸Áî£»½ðÈÚ×ÔÖúÉè±¸µÄSP·þÎñ½ÓÊÕ»ùÓÚCEN/XFS½á¹¹ÌåµÄ²âÊÔÖ¸Áî£¬²¢½«Æä·ÖÅä¸ø²âÊÔÖ¸Áî¶ÔÓ¦µÄ½ðÈÚ×ÔÖúÉè±¸´ý²âÄ£¿é£¬ÓÉ´ý²âÄ£¿éÖ´ÐÐ²âÊÔÖ¸Áî²¢Éú³É»ùÓÚCEN/XFS½á¹¹ÌåµÄ²âÊÔ½á¹û£»×ª»»Ä£¿é½«»ùÓÚCEN/XFS½á¹¹ÌåµÄ²âÊÔ½á¹û×ª»»Îª»ùÓÚJSON¶ÔÏóµÄ²âÊÔ½…	Êý¾Ý·ÖÎö
°æ±¾¸üÐÂ¼à¿Ø·½·¨¡¢×°ÖÃ¡¢Éè±¸¼°¼ÆËã»ú´æ´¢½éÖÊ	ÉîÛÚÇ°º£Î¢ÖÚÒøÐÐ¹É·ÝÓÐÏÞ¹«Ë¾	2020-06-28	2020-10-02	CN111736875A	Ö÷·ÖÀàºÅ£ºG06F8/65(20180101)	ÔÚÉó-¹«¿ª	518000 ¹ã¶«Ê¡ÉîÛÚÊÐÇ°º£Éî¸ÛºÏ×÷ÇøÇ°ÍåÒ»Â·1ºÅA¶°201ÊÒ(Èë×¤ÉîÛÚÊÐÇ°º£ÉÌÎñÃØÊéÓÐÏÞ¹«Ë¾)	±¾·¢Ã÷Éæ¼°½ðÈÚ¿Æ¼¼(Fintech)¼¼ÊõÁìÓò£¬±¾·¢Ã÷¹«¿ªÁËÒ»ÖÖ°æ±¾¸üÐÂ¼à¿Ø·½·¨¡¢×°ÖÃ¡¢Éè±¸¼°¼ÆËã»ú´æ´¢½éÖÊ£»¸Ã·½·¨°üÀ¨£ºÔÚ¼ì²âµ½ÒµÎñÐèÇó¸üÐÂÊ±£¬È·¶¨ÐÂµÄÒµÎñÐèÇó¹ØÁªµÄÒµÎñÏµÍ³£¬´´½¨ËùÊöÒµÎñÏµÍ³µÄÏµÍ³¿ìÕÕ£»ÔÚ¼ì²âµ½ËùÊöÏµÍ³¿ìÕÕ´´½¨Íê³ÉÊ±£¬¸ù¾ÝËùÊöÒµÎñÐèÇó¸üÐÂËùÊöÒµÎñÏµÍ³£»ÔÚÒµÎñÏµÍ³¸üÐÂÍê³ÉÊ±£¬»ñÈ¡¸üÐÂ°æ±¾ÐÅÏ¢£¬½«ËùÊö¸üÐÂ°æ±¾ÐÅÏ¢ÓëËùÊöÏµÍ³¿ìÕÕÖÐµÄ³õÊ¼°æ±¾ÐÅÏ¢½øÐÐ±È¶Ô£¬»ñµÃ²îÒì°æ±¾ÐÅÏ¢£»ÔÚ½ÓÊÕµ½ÒµÎñÏµÍ³¸æ¾¯Ìá…	Êý¾Ý·ÖÎö
Ò»ÖÖ¼ì²âÓÃ»§ÑéÖ¤ÐÐÎªµÄ·½·¨¼°×°ÖÃ	ÉîÛÚÇ°º£Î¢ÖÚÒøÐÐ¹É·ÝÓÐÏÞ¹«Ë¾	2020-06-28	2020-10-02	CN111737677A	Ö÷·ÖÀàºÅ£ºG06F21/36(20130101)	ÔÚÉó-¹«¿ª	518027 ¹ã¶«Ê¡ÉîÛÚÊÐÇ°º£Éî¸ÛºÏ×÷ÇøÇ°ÍåÒ»Â·1ºÅA¶°201ÊÒ	±¾·¢Ã÷ÊµÊ©ÀýÉæ¼°½ðÈÚ¿Æ¼¼(Fintech)ÁìÓò£¬¹«¿ªÒ»ÖÖ¼ì²âÓÃ»§ÑéÖ¤ÐÐÎªµÄ·½·¨¼°×°ÖÃ£¬»ñÈ¡´ýÑéÖ¤½çÃæÉÏµÄ»¬¿éµÄ»¬¶¯ÐÅÏ¢£»»¬¶¯ÐÅÏ¢ÊÇÍ¨¹ý²É¼¯»¬¿éÔÚ»¬¶¯¹ý³ÌÖÐ¸÷Í£¶ÙµãµÄÍ£¶ÙÐÅÏ¢µÃµ½µÄ£»¸ù¾ÝËù¸÷Í£¶ÙµãµÄÍ£¶ÙÐÅÏ¢£¬È·¶¨»¬¿éÔÚ»¬¶¯¹ý³ÌÖÐµÄ¸÷ËÙ¶ÈÐÅÏ¢£»ÔÚ¸÷ËÙ¶ÈÐÅÏ¢Âú×ãÉè¶¨Ìõ¼þÊ±£¬È·¶¨»¬¿éµÄ»¬¶¯ÐÅÏ¢·ûºÏÓÃ»§ÑéÖ¤ÐÐÎª£¬´Ó¶ø½«´ýÑéÖ¤½çÃæ×ªÎªÄ¿±ê½çÃæ¡£¸Ã·½°¸»ùÓÚ»¬¿éÑéÖ¤ÂëµÄÑéÖ¤·½Ê½£¬Í¨¹ý»ñÈ¡»¬¿éÔÚ»¬¶¯¹ý³ÌÖÐµÄÍ£¶ÙµãµÄÍ£¶ÙÐÅÏ¢…	°²È«
Ò»ÖÖÂ¼ÖÆ»Ø·Å²âÊÔµÄ·½·¨¼°×°ÖÃ	ÉîÛÚÇ°º£Î¢ÖÚÒøÐÐ¹É·ÝÓÐÏÞ¹«Ë¾	2020-06-30	2020-10-13	CN111767227A	Ö÷·ÖÀàºÅ£ºG06F11/36(20060101)	ÔÚÉó-¹«¿ª	518027 ¹ã¶«Ê¡ÉîÛÚÊÐÇ°º£Éî¸ÛºÏ×÷ÇøÇ°ÍåÒ»Â·1ºÅA¶°201ÊÒ	±¾·¢Ã÷Éæ¼°½ðÈÚ¿Æ¼¼(Fintech)ÁìÓò£¬²¢¹«¿ªÁËÒ»ÖÖÂ¼ÖÆ»Ø·Å²âÊÔµÄ·½·¨¼°×°ÖÃ£¬·½·¨°üÀ¨£º»ùÓÚ²âÊÔÓÃÀýÉú³ÉÕë¶Ô¶à½Ó¿ÚµÄ²âÊÔÇëÇó£»ÔÚ¶à½Ó¿ÚÔËÐÐ²âÊÔÇëÇóÊ±²É¼¯¸÷½Ó¿ÚµÄ²âÊÔÊý¾Ý£»ÆäÖÐ£¬ÖÁÉÙÒ»¸ö½Ó¿ÚµÄ²âÊÔÊý¾Ý°üÀ¨ÔÚ½Ó¿ÚÔËÐÐÇ°²É¼¯µÄµÚÒ»Êý¾ÝºÍÔÚ½Ó¿ÚÔËÐÐºó²É¼¯µÄµÚ¶þÊý¾Ý£»µÚÒ»Êý¾Ý°üÀ¨ÊäÈë½Ó¿ÚµÄÓÃÀý±äÁ¿²ÎÊý£»µÚ¶þÊý¾Ý°üÀ¨½Ó¿ÚµÄÇëÇó±¨ÎÄºÍ½Ó¿ÚµÄÏìÓ¦±¨ÎÄ£»¼ÇÂ¼½Ó¿ÚµÄ²âÊÔÊý¾Ý×÷Îª½Ó¿ÚµÄ»Ø·Å²âÊÔ¡£±¾·¢Ã÷Í¨¹ýÔÚ½Ó¿ÚÔËÐÐÇ°²É¼¯µÚÒ»…	Êý¾Ý·ÖÎö
»ùÓÚ¿ËÂ¡µÄÊý¾ÝÐÎÌ¬Éú³É·½·¨¡¢×°ÖÃ¡¢ÖÕ¶ËÉè±¸¼°½éÖÊ	ÉîÛÚÇ°º£Î¢ÖÚÒøÐÐ¹É·ÝÓÐÏÞ¹«Ë¾	2020-06-30	2020-10-09	CN111752927A	Ö÷·ÖÀàºÅ£ºG06F16/21(20190101)	ÔÚÉó-¹«¿ª	518000 ¹ã¶«Ê¡ÉîÛÚÊÐÇ°º£Éî¸ÛºÏ×÷ÇøÇ°ÍåÒ»Â·1ºÅA¶°201ÊÒ(Èë×¤ÉîÛÚÊÐÇ°º£ÉÌÎñÃØÊéÓÐÏÞ¹«Ë¾)	±¾·¢Ã÷Éæ¼°½ðÈÚ¿Æ¼¼¼¼ÊõÁìÓò£¬¹«¿ªÁËÒ»ÖÖ»ùÓÚ¿ËÂ¡µÄÊý¾ÝÐÎÌ¬Éú³É·½·¨¡¢×°ÖÃ¡¢ÖÕ¶ËÉè±¸¼°¼ÆËã»ú´æ´¢½éÖÊ¡£¸Ã»ùÓÚ¿ËÂ¡µÄÊý¾ÝÐÎÌ¬Éú³É·½·¨»ùÓÚ»ñÈ¡ËÑË÷¹Ø¼üÖµ£¬µ÷ÓÃÊý¾Ý¿ËÂ¡Ä£ÐÍ°´ÕÕËùÊöËÑË÷¹Ø¼üÖµ´ÓÔ¤ÉèÔ´»·¾³ÖÐ×¥È¡Êý¾ÝÐÎÌ¬£»½«ËùÊöÊý¾ÝÐÎÌ¬±¸·Ýµ½Êý¾Ý¿âÖÐ£¬²¢´ÓËùÊöÊý¾Ý¿âÖÐ½«ËùÊöÊý¾ÝÐÎÌ¬¿ËÂ¡ÖÁÔ¤ÉèÄ¿±ê»·¾³£»ÔÚËùÊöÔ¤ÉèÄ¿±ê»·¾³ÖÐ»ñÈ¡¿ËÂ¡µÄÊý¾ÝÐÎÌ¬¶à³öµÄ²åÈëÓï¾ä£»Õë¶ÔËùÊö²åÈëÓï¾äµÄ×Ö¶ÎÈ¡Öµ½øÐÐÅúÁ¿Ìæ»»£¬ÒÔ½«Ìæ»»ËùÊö×Ö¶ÎÈ…	Êý¾Ý·ÖÎö
ÅäÖÃÐÞ¸Ä·½·¨¡¢×°ÖÃ¡¢¼ÆËãÉè±¸ºÍ´æ´¢½éÖÊ	ÉîÛÚÇ°º£Î¢ÖÚÒøÐÐ¹É·ÝÓÐÏÞ¹«Ë¾	2020-06-30	2020-10-09	CN111752642A	Ö÷·ÖÀàºÅ£ºG06F9/445(20180101)	ÔÚÉó-¹«¿ª	518027 ¹ã¶«Ê¡ÉîÛÚÊÐÇ°º£Éî¸ÛºÏ×÷ÇøÇ°ÍåÒ»Â·1ºÅA¶°201ÊÒ	±¾·¢Ã÷Éæ¼°½ðÈÚ¿Æ¼¼(Fintech)ÁìÓò£¬²¢¹«¿ªÁËÒ»ÖÖÅäÖÃÐÞ¸Ä·½·¨¡¢×°ÖÃ¡¢¼ÆËãÉè±¸ºÍ´æ´¢½éÖÊ¡£±¾·¢Ã÷ÊµÊ©Àý£¬ÏìÓ¦ÓÃ»§´¥·¢µÄÐÞ¸ÄÅäÖÃÖ¸Áî£¬È·¶¨ÐÞ¸ÄÅäÖÃÖ¸ÁîÖÐ°üº¬µÄÅäÖÃÐÅÏ¢£»È·¶¨ÅäÖÃÐÅÏ¢ÖÐÓëÔ¤ÉèµÄÒ×³ö´íÀàÐÍ¼¯ºÏÆ¥ÅäµÄÄ¿±êÄÚÈÝ£»¸ù¾ÝÄ¿±êÄÚÈÝËùÊôµÄÒ×³ö´íÀàÐÍ¶ÔÓ¦Ô¤ÉèµÄÑéÖ¤·½·¨¶ÔÄ¿±êÄÚÈÝ½øÐÐÑéÖ¤£¬µÃµ½Ä¿±êÄÚÈÝµÄÑéÖ¤½á¹û£»¸ù¾ÝÄ¿±êÄÚÈÝµÄÑéÖ¤½á¹û£¬È·¶¨ÅäÖÃÐÅÏ¢µÄ³ö´íÂÊ£»Èô³ö´íÂÊµÍÓÚÔ¤ÉèÖµ£¬Ôò¸ù¾ÝÐÞ¸ÄÅäÖÃÖ¸ÁîÖÐ°üº¬µÄÅäÖÃ…	°²È«
Ò»ÖÖÏµÍ³ÖØ¹¹·½·¨¡¢×°ÖÃºÍµç×ÓÉè±¸	±±¾©ä¿¬rÐÅÏ¢¿Æ¼¼ÓÐÏÞ¹«Ë¾	2020-07-14	2020-12-01	CN112015469A	Ö÷·ÖÀàºÅ£ºG06F8/76(20180101)	ÔÚÉó-¹«¿ª	100012 ±±¾©ÊÐ³¯ÑôÇøË«ÓªÂ·11ºÅÔº3ºÅÂ¥2²ã4µ¥Ôª207	±¾·¢Ã÷Ìá¹©ÁËÒ»ÖÖÏµÍ³ÖØ¹¹·½·¨¡¢×°ÖÃºÍµç×ÓÉè±¸£¬¸Ã·½·¨ÓÃÓÚÖØ¹¹½ðÈÚ·þÎñÏµÍ³£¬¸Ã½ðÈÚ·þÎñÏµÍ³Óë¶à¸öÏµÍ³½øÐÐÊý¾Ý½»»¥£¬²¢ÓÃÓÚ²éÑ¯Óë½ðÈÚ²úÆ·Ïà¹ØµÄÒµÎñÊý¾Ý£¬¸Ã·½·¨°üÀ¨£º¾É½ðÈÚ·þÎñÏµÍ³ÓëÏûÏ¢´úÀí·þÎñÆ÷ºÍ·ç¿ØÉóÅúÏµÍ³ÏàÁ¬½Ó£¬²¢¸øÒµÎñ¶ËÌá¹©Êý¾Ý²éÑ¯·þÎñ£»¹¹½¨Ò»¸öÓë¾É½ðÈÚ·þÎñÏµÍ³²¢ÐÐµÄÐÂ½ðÈÚ·þÎñÏµÍ³£¬½«¾É½ðÈÚ·þÎñÏµÍ³µÄÈ«²¿´úÂëÒÆÖ²ÖÁÐÂ½ðÈÚ·þÎñÏµÍ³£¬²¢½«¾É½ðÈÚ·þÎñÏµÍ³µÄÏû·Ñ·½Ê½¸ü¸Ä³ÉÏûÏ¢ÃÝµÈ£»½¨Á¢·Ö²¼Ê½Êý¾Ý¿â£»½«Á…	Êý¾Ý·ÖÎö
Ò»ÖÖ»ùÓÚÈË¹¤ÖÇÄÜµÄÒøÐÐÒµÎñ¹ÜÀíÏµÍ³	Ö£ÖÝÊÐ¶¦¾§ÐÅÏ¢¼¼ÊõÓÐÏÞ¹«Ë¾	2020-07-15	2020-10-16	CN111784511A	Ö÷·ÖÀàºÅ£ºG06Q40/02(20120101)	ÔÚÉó-¹«¿ª	450000 ºÓÄÏÊ¡Ö£ÖÝÊÐ¸ßÐÂ¼¼Êõ²úÒµ¿ª·¢Çø¹ú¼Ò´óÑ§¿Æ¼¼Ô°·õ»¯ÖÐÐÄ2ºÅÂ¥È¹Â¥Èý²ã328-330ºÅ·¿AÇø3ºÅ	±¾·¢Ã÷Éæ¼°Ò»ÖÖ»ùÓÚÈË¹¤ÖÇÄÜµÄÒøÐÐÒµÎñ¹ÜÀíÏµÍ³£¬°üÀ¨ÒøÐÐÒµÎñ¹ÜÀí×°ÖÃºÍË½ÓÐÔÆ·þÎñÆ÷£¬ÒøÐÐÒµÎñ¹ÜÀí×°ÖÃ°üÀ¨ÒøÐÐ¹¤×÷ÈËÔ±Éí·ÝÐÅÏ¢»ñÈ¡Ä£¿é¡¢ÒøÐÐ¹¤×÷ÈËÔ±Éí·ÝÑéÖ¤Ä£¿é¡¢ÒøÐÐÒµÎñÊý¾Ý¿â¡¢ÒøÐÐÒµÎñÊý¾ÝÌáÈ¡Ä£¿é¡¢ÒøÐÐÒµÎñÊý¾Ý·ÖÀàÄ£¿é¡¢ÒøÐÐÒµÎñÊý¾ÝÌáÈ¡ÓïÒôÖ¸Áî½ÓÊÕÄ£¿é¡¢ÓïÒôÐÅºÅ´¦ÀíÄ£¿é¡¢Ä¿±êÒøÐÐÒµÎñÊý¾Ý»ñÈ¡Ä£¿éºÍÄ¿±êÒøÐÐÒµÎñÊý¾ÝÊä³öÄ£¿é£¬Ë½ÓÐÔÆ·þÎñÆ÷°üÀ¨´æ´¢¹ÜÀíÄ£¿é¡¢Óë»®·ÖµÃµ½µÄÒøÐÐÒµÎñÊý¾Ý¼¯ºÏÏàÍ¬¸öÊýµÄÖ÷´æ´¢Ä£¿…	°²È«
»Ø¹é²âÊÔ¹æ»®·½·¨¡¢×°ÖÃ¡¢¼ÆËã»úÏµÍ³ºÍ½éÖÊ	ÖÐ¹ú¹¤ÉÌÒøÐÐ¹É·ÝÓÐÏÞ¹«Ë¾	2020-07-27	2020-10-27	CN111831574A	Ö÷·ÖÀàºÅ£ºG06F11/36(20060101)	ÔÚÉó-¹«¿ª	100140 ±±¾©ÊÐÎ÷³ÇÇø¸´ÐËÃÅÄÚ´ó½Ö55ºÅ	±¾¹«¿ªÌá¹©ÁËÒ»ÖÖ»Ø¹é²âÊÔ¹æ»®·½·¨£¬°üÀ¨£º´Ó´úÂë²Ö¿âÖÐ»ñÈ¡´ý²âÓ¦ÓÃµÄµ±Ç°°æ±¾Ô´´úÂëºÍÇ°Ò»°æ±¾Ô´´úÂë£»±È½Ïµ±Ç°°æ±¾Ô´´úÂëºÍÇ°Ò»°æ±¾Ô´´úÂë£¬ÒÔÈ·¶¨µ±Ç°°æ±¾Ô´´úÂëÏà¶ÔÓÚÇ°Ò»°æ±¾Ô´´úÂëµÄÔöÁ¿´úÂëº¯ÊýÇåµ¥£»È·¶¨ÓëÔöÁ¿´úÂëº¯ÊýÇåµ¥Ïà¹ØÁªµÄÄ¿±ê´úÂëÂ·¾¶£»ÒÔ¼°£¬´Ó²âÊÔ°¸Àý¿âÖÐÈ·¶¨Õë¶ÔÄ¿±ê´úÂëÂ·¾¶µÄÀúÊ·²âÊÔ°¸Àý£¬ÒÔ×÷Îª´ý²âÓ¦ÓÃµÄ»Ø¹é²âÊÔ°¸Àý¡£±¾¹«¿ª»¹Ìá¹©ÁËÒ»ÖÖ»Ø¹é²âÊÔ¹æ»®×°ÖÃ¡¢¼ÆËã»úÏµÍ³ºÍ½éÖÊ¡£±¾¹«¿ªÌá¹©µÄ»Ø¹é²âÊÔ¹…	Êý¾Ý·ÖÎö
ÓÃ»§½çÃæ×Ô¶¯»¯²âÊÔ·½·¨¼°×°ÖÃ	ÖÐ¹ú¹¤ÉÌÒøÐÐ¹É·ÝÓÐÏÞ¹«Ë¾	2020-07-31	2020-11-17	CN111949522A	Ö÷·ÖÀàºÅ£ºG06F11/36(20060101)	ÔÚÉó-¹«¿ª	100140 ±±¾©ÊÐÎ÷³ÇÇø¸´ÐËÃÅÄÚ´ó½Ö55ºÅ	±¾ÉêÇëÊµÊ©ÀýÌá¹©Ò»ÖÖÓÃ»§½çÃæ×Ô¶¯»¯²âÊÔ·½·¨¼°×°ÖÃ£¬¿ÉÓÃÓÚ»¥ÁªÍø½ðÈÚÁìÓò£¬ËùÊö·½·¨°üÀ¨£º½ÓÊÕÓÃ»§·¢ËÍµÄÒ³Ãæ²âÊÔ°¸Àý£¬ÆäÖÐ£¬ËùÊöÒ³Ãæ²âÊÔ°¸ÀýÊÇ¸ù¾ÝÔ¤Éè²Ù×÷·ÖÀà¿â¡¢Ô¤Éè¿Ø¼þËÑË÷ÒýÇæºÍÓÃ»§ÊäÈëµÄÄ¿±ê¿Ø¼þ²ÎÊýµÃµ½£»¸ù¾ÝËùÊöÒ³Ãæ²âÊÔ°¸ÀýÖÐµÄÄ¿±ê²Ù×÷¡¢Ä¿±ê¿Ø¼þ¼°ËùÊöÄ¿±ê¿Ø¼þ²ÎÊý£¬¶ÔÄ¿±êÒ³Ãæ½øÐÐÒ³Ãæ²âÊÔ£¬µÃµ½Ò³Ãæ²âÊÔ½á¹û£»±¾ÉêÇëÄÜ¹»ÓÐÐ§Ìá¸ßÓÃ»§½çÃæ×Ô¶¯»¯²âÊÔµÄÐ§ÂÊºÍ×¼È·ÂÊ£¬½ÚÊ¡ÈËÁ¦ºÍÑÐ·¢³É±¾¡£	Êý¾Ý·ÖÎö
Ò»ÖÖÆÀ¹ÀÒøÐÐÅúÁ¿×÷Òµ½¡¿µ×´Ì¬Óëµ÷ÕûÊ±¼ä´°¿ÚµÄ·½·¨	ËÄ´¨ÐÂÍøÒøÐÐ¹É·ÝÓÐÏÞ¹«Ë¾	2020-08-06	2020-10-02	CN111736979A	Ö÷·ÖÀàºÅ£ºG06F9/48(20060101)	ÔÚÉó-¹«¿ª	610094 ËÄ´¨Ê¡³É¶¼ÊÐ³É¶¼¸ßÐÂÇø¼ªÌ©ÈýÂ·8ºÅ1¶°1µ¥Ôª26Â¥1-8ºÅ	±¾·¢Ã÷Ò»ÖÖÆÀ¹ÀÒøÐÐÅúÁ¿×÷Òµ½¡¿µ×´Ì¬Óëµ÷ÕûÊ±¼ä´°¿ÚµÄ·½·¨£ºA.»ñÈ¡ÅúÁ¿×÷ÒµÖ´ÐÐÐÅÏ¢£»B.¶Ô×÷ÒµÖ´ÐÐÐÅÏ¢½øÐÐ¼ÆËãÅÅÃû»ñµÃ½¡¿µ¶ÈÅÅÃû£»C.¶Ô×÷ÒµÖ´ÐÐÐÅÏ¢½øÐÐ¼Ó¹¤ÔËËãÔ¤²â³ö½¨ÒéÊ±¼ä´°¿Ú£»D.¸ù¾Ý½¡¿µ¶ÈÅÅÃûºÍ²Î¿¼½¨ÒéÊ±¼ä´°¿Úµ÷ÕûÅúÁ¿×÷ÒµÖ´ÐÐÊ±¼ä´°¿Ú¡£±¾·¢Ã÷¸ø³öÒ»¸öºâÁ¿ÅúÁ¿×÷ÒµÔËÐÐ½¡¿µ×´Ì¬µÄÅúÁ¿×÷ÒµÏµÍ³£¬²¢¸ù¾Ý¸ÃÅúÁ¿×÷ÒµÏµÍ³¸ø³öÅúÁ¿×÷ÒµµÄ¼Æ»®Ö´ÐÐÊ±¼ä´°¿Úµ÷Åä·½°¸£¬ÒÔ¹©ÅúÁ¿×÷ÒµÎ¬»¤ÈËÔ±½øÐÐ²Î¿¼¡£Ïà½ÏÓÚ´«Í³ÈË¹¤¹Û²ìÅúÁ¿Ö…	Êý¾Ý·ÖÎö
Êý¾ÝÍ¬²½·½·¨¼°×°ÖÃ	ÖÐ¹ú¹¤ÉÌÒøÐÐ¹É·ÝÓÐÏÞ¹«Ë¾	2020-08-07	2020-11-13	CN111930841A	Ö÷·ÖÀàºÅ£ºG06F16/27(20190101)	ÔÚÉó-¹«¿ª	100140 ±±¾©ÊÐÎ÷³ÇÇø¸´ÐËÃÅÄÚ´ó½Ö55ºÅ	±¾·¢Ã÷Ìá¹©ÁËÊý¾ÝÍ¬²½·½·¨¼°×°ÖÃ£¬·½·¨°üÀ¨£º´ÓÐÅ´ûÊý¾Ý¿â·þÎñÆ÷»ñÈ¡´ýÍ¬²½Êý¾Ý£»¸ù¾ÝËùÊö´ýÍ¬²½Êý¾ÝµÄÖ÷¼üÅäÖÃÐÅÏ¢Éú³ÉÍ¬²½ÃüÁî£»¸ù¾ÝËùÊöÍ¬²½ÃüÁî½«ËùÊö´ýÍ¬²½Êý¾ÝÍ¬²½µ½±¸·ÝÊý¾Ý¿âºÍES·þÎñÆ÷¡£±¾·¢Ã÷½«´ÓÐÅ´ûÊý¾Ý¿â·þÎñÆ÷»ñÈ¡µÄ´ýÍ¬²½Êý¾Ý£¬Í¬²½µ½±¸·ÝÊý¾Ý¿âºÍES·þÎñÆ÷£¬Ìá¹©Ò»ÖÖÓÃÓÚ¸ßÊ±Ð§Êý¾ÝÍ¬²½µÄÊý¾Ý¿ìËÙ²éÑ¯µÄ·½°¸£¬Ìá¸ßÊý¾ÝÍ¬²½Ê±Ð§£¬½µµÍÊý¾Ý¿âÑ¹Á¦£¬ÓÅ»¯ÒµÎñÌåÑé£¬ÊµÏÖÅäÖÃ¼¶µÄÊý¾Ý×¼ÊµÊ±Í¬²½·½°¸£¬Õë¶ÔÄ³Ò»ÌØ¶¨ÁìÓòÊ…	½è´û
Ò»ÖÖÔ¶³ÌÍøÂçÏû·ÑÏµÍ³µÄ½ðÈÚÊý¾Ý¹ÜÀí·½·¨	ÑÎ³Ç¹¤Ñ§Ôº	2020-08-12	2020-11-13	CN111935158A	Ö÷·ÖÀàºÅ£ºH04L29/06(20060101)	ÔÚÉó-¹«¿ª	224053 ½­ËÕÊ¡ÑÎ³ÇÊÐÍ¤ºþÇøÏ£Íû´óµÀÖÐÂ·1ºÅ	±¾·¢Ã÷Éæ¼°Ò»ÖÖÔ¶³ÌÍøÂçÏû·ÑÏµÍ³µÄ½ðÈÚÊý¾Ý¹ÜÀí·½·¨£¬¸ÃÔ¶³ÌÍøÂçÏû·ÑÏµÍ³°üÀ¨¿¨Æ¬¡¢Ïû·ÑÉè±¸ÒÔ¼°Óë¹ÜÀíÏµÍ³ÖÕ¶Ë£¬¸Ã¹ÜÀí·½·¨°üÀ¨²¢ÐÐÊµÊ©µÄ£º¹ÜÀíÏµÍ³ÖÕ¶ËÎªÃ¿¸ö³¡ËùµÄÏû·ÑÉè±¸ÅäÖÃ¶ÀÁ¢µÄÃÜÔ¿£¬¸÷Ïû·ÑÉè±¸Óë¹ÜÀíÏµÍ³ÖÕ¶ËÍ¨Ñ¶Ê±¶Ô½ðÈÚÊý¾Ý¼ÓÃÜ£»¸÷Ïû·ÑÉè±¸²ÉÓÃ°üÀ¨Á½¸öMCUµÄ·À¸ÉÈÅÈßÓà±¸·ÝÏµÍ³£¬ÊµÏÖÊµÊ±±¸·Ý£»Ïû·ÑÉè±¸½«½ðÈÚÊý¾Ý¼ÓÃÜ´æ´¢ÔÚ¿¨Æ¬ÖÐ£»Ïû·ÑÉè±¸Óë¿¨Æ¬»ò¹ÜÀíÏµÍ³ÖÕ¶Ë½øÐÐÍ¨Ñ¶·¢ËÍ½ðÈÚÊý¾ÝÊ±£¬¸ù¾Ý·µ»¹½á¹û¶Ô½ðÈÚÊý¾Ý½ø…	Êý¾Ý·ÖÎö
Ò»ÖÖ»ùÓÚ²úÆ·Ä£°åµÄ½ðÈÚ²úÆ·¿ª·¢·½·¨¼°×°ÖÃ	ÖÐ¹ú¹¤ÉÌÒøÐÐ¹É·ÝÓÐÏÞ¹«Ë¾	2020-08-13	2020-11-17	CN111949245A	Ö÷·ÖÀàºÅ£ºG06F8/20(20180101)	ÔÚÉó-¹«¿ª	100140 ±±¾©ÊÐÎ÷³ÇÇø¸´ÐËÃÅÄÚ´ó½Ö55ºÅ	±¾·¢Ã÷Ìá¹©ÁËÒ»ÖÖ»ùÓÚ²úÆ·Ä£°åµÄ½ðÈÚ²úÆ·¿ª·¢·½·¨¼°×°ÖÃ£¬°üÀ¨£º¸ù¾Ý»ñÈ¡µÄÄ¿±ê²úÆ·µÄÒµÎñÊôÐÔ¼°ÒµÎñÊôÐÔÐèÇóÉú³ÉÄ¿±ê²úÆ·µÄÒµÎñÄ£°å£»¸ù¾ÝÒµÎñÄ£°åÖÐµÄÒµÎñÊôÐÔÃû³Æ´Ó´æÁ¿»ùÊý×Ê²ú¿âÖÐ²éÕÒÓë¸ÃÒµÎñÊôÐÔÃû³Æ¶ÔÓ¦µÄÊôÐÔ´úÂë£¬²¢¸ù¾ÝÊôÐÔ´úÂë¶ÔÓ¦µÄÊôÐÔ½¨Á¢²úÆ·¼¼ÊõÄ£°å£»¸ù¾Ý²úÆ·¼¼ÊõÄ£°å¶ÔÄ¿±ê²úÆ·½øÐÐ½ðÈÚ²úÆ·µÄ¾ßÌåÊôÐÔºÍ·þÎñ¹¦ÄÜµÄ¿ª·¢²âÊÔ¡£±¾ÉêÇë½â¾öÁËÏÖÓÐ½ðÈÚ²úÆ·Èí¼þÏµÍ³¿ª·¢¿ÉÀ©Õ¹ÐÔ²î£¬²»ÄÜºÜºÃµØÊ¹ÓÃÒµÎñÁ÷³ÌµÄ±ä¸ü£¬³…	Êý¾Ý·ÖÎö
Ó¦ÓÃÆÀ¹À·½·¨¡¢ÏµÍ³¡¢×°ÖÃ¡¢Éè±¸¼°½éÖÊ	Öéº£½ðÖÇÎ¬ÐÅÏ¢¿Æ¼¼ÓÐÏÞ¹«Ë¾	2020-08-14	2020-12-18	CN112100056A	Ö÷·ÖÀàºÅ£ºG06F11/36(20060101)	ÔÚÉó-¹«¿ª	519000 ¹ã¶«Ê¡Öéº£ÊÐÌÆ¼ÒÍåÕò¹þ¹¤´óÂ·1ºÅ1¶°A301t	±¾ÉêÇëÊÊÓÃÓÚ¼ÆËã»ú¼¼ÊõÁìÓò£¬Ìá¹©ÁËÓ¦ÓÃÆÀ¹À·½·¨£¬°üÀ¨£º²É¼¯Ä¿±êÓ¦ÓÃËù³ÊÏÖµÄÄ¿±ê¹ÉÆ±µÄ¹ÉÆ±¹ØÁªÐÅÏ¢¼¯£¬ÆäÖÐ£¬¹ÉÆ±¹ØÁªÐÅÏ¢¼¯ÖÐµÄ¹ÉÆ±¹ØÁªÐÅÏ¢°üÀ¨Ä¿±ê¹ÉÆ±µÄ¼ÛÖµºÍÓë¼ÛÖµ¹ØÁªµÄ¼ÛÖµ¸üÐÂÊ±¼ä£»¸ù¾Ý¸÷Ä¿±êÓ¦ÓÃËù³ÊÏÖµÄÄ¿±ê¹ÉÆ±µÄ¹ÉÆ±¹ØÁªÐÅÏ¢¼¯£¬È·¶¨¸÷Ä¿±êÓ¦ÓÃµÄÏà¶Ô¼ÛÖµ¸üÐÂËÙ¶È£»¸ù¾Ý¸÷Ä¿±êÓ¦ÓÃµÄÏà¶Ô¼ÛÖµ¸üÐÂËÙ¶È£¬Éú³ÉÓÃÓÚÃèÊö¸÷Ä¿±êÓ¦ÓÃ¸üÐÂ¹ÉÆ±¼ÛÖµµÄËÙ¶ÈµÄËÙ¶ÈÆÀ¹ÀÐÅÏ¢£¬ÏòÄ¿±êÖÕ¶Ë·¢ËÍËÙ¶ÈÆÀ¹ÀÐÅÏ¢¡£Í¨¹ý¶Ô¸÷Ä¿±êÓ¦ÓÃË…	Í¶×Ê
Ò»ÖÖ²îÒì»¯ÌáÈ¡·½·¨¡¢×°ÖÃ¡¢µç×ÓÉè±¸¼°¼ÆËã»ú¿É¶Á´æ´¢½éÖÊ	ÖÐÐÅÒøÐÐ¹É·ÝÓÐÏÞ¹«Ë¾	2020-08-14	2020-12-25	CN112132176A	Ö÷·ÖÀàºÅ£ºG06K9/62(20060101)	ÔÚÉó-¹«¿ª	100020 ±±¾©ÊÐ³¯ÑôÇø¹â»ªÂ·10ºÅ1ºÅÂ¥ÖÐÐÅ´óÏÃ20²ã	±¾·¢Ã÷Éæ¼°½ðÈÚ¿Æ¼¼ÁìÓò£¬¾ßÌåÉæ¼°Ò»ÖÖ²îÒì»¯ÌáÈ¡·½·¨¡¢×°ÖÃ¡¢µç×ÓÉè±¸¼°¼ÆËã»ú¿É¶Á´æ´¢½éÖÊ£¬ËùÊö·½·¨°üÀ¨»ñÈ¡N¸öÄ¿±ê²âÊÔ°¸Àý£»ÆäÖÐN¡Ý2×ÔÈ»Êý£»¸ù¾ÝÔ¤Éè²âÊÔ°¸ÀýÊôÐÔ·ÖÀàÖ¸±ê£¬½«Ã¿Ò»¸öÄ¿±ê²âÊÔ°¸Àý·ÖMÀàÄ¿±ê²âÊÔÑù±¾£»ÆäÖÐ£¬1¡ÜM¡Ü4×ÔÈ»Êý£»¸ù¾ÝµÚÒ»Ô¤Éè¹æÔò£¬·Ö±ð¼ÆËãMÀàÄ¿±ê²âÊÔÑù±¾µÄ²îÒì¶È£»¸ù¾ÝµÚ¶þÔ¤Éè¹æÔòºÍMÀàÄ¿±ê²âÊÔÑù±¾µÄ²îÒì¶È£¬·Ö±ð¼ÆËãÃ¿Ò»¸öÄ¿±ê²âÊÔ°¸ÀýµÄ²îÒì¶È£»ÌáÈ¡N¸öÄ¿±ê²âÊÔ°¸ÀýµÄ²îÒì¶ÈÊý¾Ý²¢Õ¹Ê¾¡£±¾·…	Êý¾Ý·ÖÎö
Ò»ÖÖ»ùÓÚ´óÊý¾ÝµÄ±àÂëÊ½µç×Ó»õ±ÒÖ§¸¶¿îÏµÍ³	ÉÂÎ÷¿Æ¼¼´óÑ§	2020-08-28	2020-11-20	CN111967863A	Ö÷·ÖÀàºÅ£ºG06Q20/06(20120101)	ÔÚÉó-¹«¿ª	710021 ÉÂÎ÷Ê¡Î÷°²ÊÐÎ´ÑëÇø´óÑ§Ô°ÇøÉÂÎ÷¿Æ¼¼´óÑ§	Ò»ÖÖ»ùÓÚ´óÊý¾ÝµÄ±àÂëÊ½µç×Ó»õ±ÒÖ§¸¶¿îÏµÍ³£¬°üÀ¨ÓÃ»§ÖÕ¶Ë¡¢ÒøÐÐ·þÎñÆ÷ºÍÔÆ·þÎñÆ÷£¬ÓÃ»§ÖÕ¶ËÖ÷ÒªÊÇ¸¨Öú±àÂëÊ½µç×Ó»õ±Ò½»Ò×µÄÊÖ»úAPPÏµÍ³£¬¿ÉÒÔÍê³É¶Ò»»¼°×ªÕËµÄ»ù±¾¹¦ÄÜ£¬ÔÚÊ¹ÓÃÇ°Ðë½øÐÐÓÃ»§×¢²á²¢ÓÉ¼à¹Ü²¿ÃÅÉóºËÍ¨¹ý£¬È¡µÃ°üº¬¸öÈËÐÅÏ¢µÄÓÃ»§´úÂë¡£½»Ò×Íê³Éºó£¬¸¶¿îÕË»§¼õÉÙÏàÓ¦µÄÐÂµç×Ó»õ±Ò£¬ÊÕ¿îÕË»§Ôö¼ÓÏàÓ¦µÄÐÂµç×Ó»õ±Ò£¬ÇÒÔö¼ÓµÄÐÂµç×Ó»õ±ÒÓë¸¶¿îÈËµÄÓÃ»§´úÂë½â³ý°ó¶¨£¬ÓëÊÕ¿îÈËµÄÓÃ»§´úÂë°ó¶¨¡£ËùÊöÒøÐÐ·þÎñÆ÷ÓÃÓÚÊý¾Ý½âÎö…	°²È«
ÅúÁ¿ÎÄ¼þ´«Êä·½·¨¼°×°ÖÃ	ÖÐ¹úÒøÐÐ¹É·ÝÓÐÏÞ¹«Ë¾	2020-09-03	2020-10-30	CN111866189A	Ö÷·ÖÀàºÅ£ºH04L29/08(20060101)	ÔÚÉó-¹«¿ª	100818 ±±¾©ÊÐÎ÷³ÇÇø¸´ÐËÃÅÄÚ´ó½Ö1ºÅ	±¾·¢Ã÷¹«¿ªÁËÒ»ÖÖÅúÁ¿ÎÄ¼þ´«Êä·½·¨¼°×°ÖÃ£¬¸Ã·½·¨°üÀ¨£º½ÓÊÕÒøÐÐÒµÎñÏµÍ³ÉÏ´«µÄµÚÒ»´«ÊäÎÄ¼þ£»¶ÔµÚÒ»´«ÊäÎÄ¼þ½øÐÐ¸ñÊ½ÐÞ¸Ä£¬ÒÔÊ¹µÚÒ»´«ÊäÎÄ¼þµÄ¸ñÊ½ÓëÍâ²¿ÒµÎñÏµÍ³ÎÄ¼þµÄ¸ñÊ½ÏàÍ¬£»ÀûÓÃÅú´¦Àí½Å±¾¶Ô¸ñÊ½ÐÞ¸ÄºóµÄµÚÒ»´«ÊäÎÄ¼þ½øÐÐÔ¤´¦Àí£¬¸ÃÔ¤´¦Àí°üÀ¨£º½âÑ¹¡¢²ð·Ö¡¢¼ÓÃÜ£»½«Ô¤´¦ÀíºóµÄµÚÒ»´«ÊäÎÄ¼þ´«ÊäÖÁÍâ²¿ÒµÎñÏµÍ³¡£±¾·¢Ã÷¿ÉÒÔÊµÏÖÒøÐÐÒµÎñÏµÍ³ÓëÍâ²¿ÒµÎñÏµÍ³¼äÎÄ¼þµÄ×Ô¶¯´«Êä£¬½µµÍÈË¹¤³É±¾ºÍÎÄ¼þ´«ÊäµÄ³ö´íÂÊ¡£	Êý¾Ý·ÖÎö
Ò»ÖÖ»ùÓÚÑÛ¶¯Ê¶±ðµÄÀí²ÆÖÕ¶Ë»ú¿Í»§¹Ø×¢¶ÈÊÕ¼¯·½·¨	ÉÏº£Òë»áÐÅÏ¢¿Æ¼¼ÓÐÏÞ¹«Ë¾	2020-09-24	2021-01-29	CN112286346A	Ö÷·ÖÀàºÅ£ºG06F3/01(20060101)	ÔÚÉó-¹«¿ª	200333 ÉÏº£ÊÐÆÕÍÓÇøÍ¬ÆÕÂ·1175Åª3ºÅ1Â¥199-119ÊÒ	Ò»ÖÖ»ùÓÚÑÛ¶¯Ê¶±ðµÄÀí²ÆÖÕ¶Ë»ú£¬°üÀ¨½ðÈÚÀí²ÆÖÕ¶Ë»ú¡¢»¹°üÀ¨ÉèÖÃÔÚ½ðÈÚÀí²ÆÖÕ¶Ë»úÉÏ·½µÄÑÛ¶¯ÒÇ¡¢»¹°üÀ¨´¦Àí×°ÖÃ¡¢»¹°üÀ¨µçÔ´Ïß¼°ÍøÏß£»´¦Àí×°ÖÃ°üÀ¨½ðÈÚÀí²Æ½»Ò×ÏµÍ³¡¢Êý¾Ý¿â¡¢ÑÛ¶¯Ð£×¼Ä£¿é¡¢ÑÛ¶¯ÊÕ¼¯Ä£¿é¡¢Êý¾ÝÔ¤´¦ÀíÄ£¿é¡¢Êý¾Ý·ÖÎöÄ£¿é¡¢Êý¾ÝÕ¹Ê¾Ä£¿é¡£±¾·¢Ã÷»¹¹«¿ªÁËÒ»ÖÖ¿Í»§¹Ø×¢¶ÈÊÕ¼¯·½·¨¡£±¾·¢Ã÷¿ÉÒÔ½«Êµ¼ÊÊ¹ÓÃµÄ½ðÈÚÏµÍ³»òÕßÒµÎñÏµÍ³ÓëÂñµãÄ£¿é½øÐÐ½á¹¹ÉÏµÄ¸ß¶È·ÖÀë£¬Í¬Ê±£¬¸ü¼ÓÈ«·½Î»µØ¡¢ÎÞºÛ¼£µØ½øÐÐ¿Í»§¹Ø×¢¶ÈµÄ¹ì¼£ÊÕ¼…	Êý¾Ý·ÖÎö
Ò»ÖÖÓ¦ÓÃÓÚÒøÐÐ×ÔÖúÉè±¸µÄÒµÎñ×èÈûÔ¤¾¯ÏµÍ³	ºãÒø½ðÈÚ¿Æ¼¼¹É·ÝÓÐÏÞ¹«Ë¾	2020-10-27	2020-11-27	CN112002083A	Ö÷·ÖÀàºÅ£ºG07F19/00(20060101)	ÔÚÉó-¹«¿ª	300308 Ìì½òÊÐ±õº£ÐÂÇø×ÔÃ³ÊÔÑéÇø(¿Õ¸Û¾­¼ÃÇø)Î÷°ËµÀ30ºÅ	±¾·¢Ã÷¹«¿ªÁËÒ»ÖÖÓ¦ÓÃÓÚÒøÐÐ×ÔÖúÉè±¸µÄÒµÎñ×èÈûÔ¤¾¯ÏµÍ³£¬Ê×ÏÈ¹éÄÉÖÇÄÜÖÕ¶Ë×ÔÖúÉè±¸µÄÒµÎñÀàÐÍ£¬ÏµÍ³ÖÐÔ¼¶¨ÁË¿Í·þÈËÔ±µÄÇ©µ½Óë×´Ì¬¸üÐÂ£¬²¢ÓÃ»§Ê¹ÓÃÖÇÄÜÖÕ¶Ë×ÔÖúÉè±¸ÖÐÓöµ½µÄ¸÷ÏîÒµÎñ½øÐÐÁËÊáÀí£¬±¾·¢Ã÷ÔÚÓ¦ÓÃÓÚÒøÐÐÍøµãÖÐÊ±£¬ÖÇÄÜÖÕ¶Ë×ÔÖúÉè±¸½áºÏºóÌ¨·þÎñÆ÷¼ÇÂ¼²¢±ê¼ÇÁËÈÝÒ××èÈûµÄÒµÎñ£¬´¦ÀíÒ××èÈûÒµÎñÇ°ÌáÇ°Í¨Öª¿Í·þÈËÔ±£¬¸¨Öú¿Í·þÈËÔ±×¼È·µØÅÐ¶ÏÒµÎñÀàÐÍ£¬¼õÉÙÁËÓÃ»§Óë¿Í·þÈËÔ±µÄ¹µÍ¨³É±¾£¬¼õÉÙÓÃ»§°ìÀíÒµÎñÊ±¼ä£¬Ìá¸ßÁËÒøÐÐÍ…	Êý¾Ý·ÖÎö
Ò»ÖÖ»ùÓÚ½ðÈÚ·çÏÕÏµÍ³µÄ×Ô¶¯»¯²âÊÔÆ½Ì¨¼°Æä´î½¨·½·¨	ËÕÄþÏû·Ñ½ðÈÚÓÐÏÞ¹«Ë¾	2020-10-28	2021-02-02	CN112306869A	Ö÷·ÖÀàºÅ£ºG06F11/36(20060101)	ÔÚÉó-¹«¿ª	210000 ½­ËÕÊ¡ÄÏ¾©ÊÐÇØ»´Çø»´º£Â·88ºÅ	±¾·¢Ã÷¹«¿ªÁËÒ»ÖÖ»ùÓÚ½ðÈÚ·çÏÕÏµÍ³µÄ×Ô¶¯»¯²âÊÔÆ½Ì¨¼°Æä´î½¨·½·¨£¬²½ÖèÈçÏÂ£º²½ÖèÒ»£ºµ±ÏµÍ³·¢²¼ÐÂ°æ±¾Ê±£¬¿ªÔ´×Ô¶¯»¯·þÎñÆ÷×Ô¶¯´¥·¢µ÷ÓÃ×Ô¶¯»¯²âÊÔÆ½Ì¨£»²½Öè¶þ£ºÅäÖÃ»ù´¡ÐÅÏ¢£»²½ÖèÈý£º±à¼­²âÊÔÓÃÀý£»²½ÖèËÄ£ºÔËÐÐ²âÊÔÓÃÀý£»²½ÖèÎå£ºÅÐ¾ö¼ì²éµã£»²½ÖèÁù£ºÈç¹ûµ±Ç°ÓÃÀý²âÊÔÊ§°Ü£¬ÔòÑ¡ÔñÖÕÖ¹²âÊÔ»òÑ¡Ôñ¼ÌÐø²âÊÔ£»²½ÖèÆß£ºÉú³É²¢·¢ËÍ²âÊÔ±¨¸æ£»²½Öè°Ë£º×Ô¶¯Éú³ÉBUG²¢Ìá½»µ½¿ªÔ´ÏîÄ¿¹ÜÀíÈí¼þ¡£±¾·¢Ã÷Í³Ò»Î¬»¤ºÍ¹ÜÀí²âÊÔ»·¾³¡¢²âÊÔÊý…	Êý¾Ý·ÖÎö
²âÊÔ·½·¨¡¢×°ÖÃ¡¢Éè±¸¼°´æ´¢½éÖÊ	ÉîÛÚÇ°º£Î¢ÖÚÒøÐÐ¹É·ÝÓÐÏÞ¹«Ë¾	2020-11-06	2021-02-09	CN112346973A	Ö÷·ÖÀàºÅ£ºG06F11/36(20060101)	ÔÚÉó-¹«¿ª	518027 ¹ã¶«Ê¡ÉîÛÚÊÐÇ°º£Éî¸ÛºÏ×÷ÇøÇ°ÍåÒ»Â·1ºÅA¶°201ÊÒ	±¾ÉêÇëÊµÊ©ÀýÌá¹©Ò»ÖÖ²âÊÔ·½·¨¡¢×°ÖÃ¡¢Éè±¸¼°´æ´¢½éÖÊ£¬¸Ã·½·¨°üÀ¨£º»ñÈ¡²âÊÔ¼ÇÂ¼¼¯ºÏ£¬²âÊÔ¼ÇÂ¼¼¯ºÏÖÐ°üÀ¨ÖÁÉÙÒ»Ìõ²âÊÔ¼ÇÂ¼£»ÔÚ²âÊÔ¼ÇÂ¼¼¯ºÏÖÐÈ·¶¨´ýÖ´ÐÐµÄµÚÒ»²âÊÔ¼ÇÂ¼£»¸ù¾ÝµÚÒ»²âÊÔ¼ÇÂ¼£¬ÔÚÖÁÉÙÁ½¸ö²âÊÔÏµÍ³ÖÐÈ·¶¨Ä¿±ê²âÊÔÏµÍ³£»ÏòÄ¿±ê²âÊÔÏµÍ³·¢ËÍ²âÊÔÐÅÏ¢£¬²âÊÔÐÅÏ¢ÖÐ°üÀ¨²âÊÔÊ±¼ä¡£ÓÃÓÚËõ¶Ì²âÊÔÏµÍ³µÄ²âÊÔÊ±³¤£¬Ìá¸ß²âÊÔÏµÍ³µÄ²âÊÔÐ§ÂÊ£¬½ø¶øÌá¸ß°üÀ¨Á½¸ö²âÊÔÏµÍ³µÄ½ðÈÚÊý¾Ý´¦ÀíÏµÍ³µÄ²âÊÔÐ§ÂÊºÍÔÚÉÏÏßÖ®ºóµÄÔËÐÐÖÊÁ¿¡£	Êý¾Ý·ÖÎö
Ò»ÖÖÖÐÐ¡ÉÌ»§Ö§¸¶ÏµÍ³ÒµÎñÖÐÌ¨Éè¼Æ·½·¨	Õã½­´óÑ§	2020-11-06	2021-01-05	CN112184195A	Ö÷·ÖÀàºÅ£ºG06Q20/06(20120101)	ÔÚÉó-¹«¿ª	310007 Õã½­Ê¡º¼ÖÝÊÐÎ÷ºþÇøÕã´óÂ·38ºÅ	±¾·¢Ã÷Éæ¼°Ö§¸¶ÏµÍ³¼¼ÊõÁìÓò£¬ÇÒ¹«¿ªÁËÒ»ÖÖÖÐÐ¡ÉÌ»§Ö§¸¶ÏµÍ³ÒµÎñÖÐÌ¨Éè¼Æ·½·¨£¬°üÀ¨ÒÔÏÂ²½Öè£ºS1¡¢ÉèÖÃÊÊÅäÇ°Ì¨µÄÊý¾Ý½Ó¿Ú£¬²¢½«¸ÃÊý¾Ý½Ó¿Ú½øÐÐ·â×°£¬Í¨¹ý¸ÃÊý¾Ý½Ó¿Ú»ñÈ¡Ç°Ì¨µÄ·ÃÎÊÊý¾Ý£¬²¢½«Ç°Ì¨»ñÈ¡µÄÊý¾ÝÀàÐÍ½øÐÐ·ÖÀà´¦Àí£»S2¡¢ÉèÖÃÊÊÅäºóÌ¨µÄÊý¾Ý½Ó¿Ú£¬²¢½«¸ÃÊý¾Ý½Ó¿Ú½øÐÐ·â×°£¬Í¨¹ý¸ÃÊý¾Ý½Ó¿Ú»ñÈ¡ºóÌ¨µÄ¼ÆËã½á¹û£»S3¡¢½«ºóÌ¨ÖÐµÄ¸÷¸ö×ÓÏµÍ³½øÐÐÍ³Ò»·â×°£¬È»ºóÍ¨¹ý²½ÖèS2ÖÐµÄ½Ó¿Ú£¬ÓëÍ³Ò»·â×°ºóµÄ¸÷¸ö×ÓÏµÍ³½øÐÐ¶Ô½Ó£»½«ºóÌ¨¸…	Ö§¸¶
Ò»ÖÖÒøÐÐÕË»§¶¯ÕËÍ¨Öª·þÎñÏµÍ³	ÖÐ¹úÅ©ÒµÒøÐÐ¹É·ÝÓÐÏÞ¹«Ë¾ÉÏº£ÊÐ·ÖÐÐ	2020-11-11	2021-03-09	CN112463167A	Ö÷·ÖÀàºÅ£ºG06F8/60(20180101)	ÔÚÉó-¹«¿ª	200120 ÉÏº£ÊÐÆÖ¶«ÐÂÇøÒø³ÇÂ·9ºÅ	±¾·¢Ã÷Éæ¼°Ò»ÖÖÒøÐÐÕË»§¶¯ÕËÍ¨Öª·þÎñÏµÍ³£¬ÓÃÓÚÒøÐÐÕË»§µ¥±ÊÊÕ¡¢¸¶¿î½»Ò×½ð¶î´ïµ½Ô¤ÉèÌõ¼þÊ±½«¶¯ÕËÐÅÏ¢Í¨Öª¿Í»§£»ÉÏÊö¶¯ÕËÍ¨Öª·þÎñÏµÍ³²¿ÊðÓÐÏûÏ¢Éú²ú·½³ÌÐòÄ£¿éºÍÏûÏ¢Ïû·Ñ·½³ÌÐòÄ£¿é£»ÉÏÊöÏûÏ¢Éú²ú·½³ÌÐòÄ£¿éÓÃÓÚ²É¼¯ÒøÐÐÕË»§¶¯ÕËÊý¾Ý£¬°üÀ¨Èô¸É²É¼¯ÒøÐÐÕË»§¶¯ÕËÊý¾ÝÏß³Ì£»ÈÎÒ»ÉÏÊö²É¼¯¶¯ÕËÊý¾ÝÖÜÆÚÈÎÎñÏß³ÌÓÃÓÚÒøÐÐÕË»§¶¯ÕËÍ¨ÖªÏûÏ¢²É¼¯²¢ÂäµØ£»ÉÏÊöÏûÏ¢Ïû·Ñ·½³ÌÐòÄ£¿éÓÃÓÚ·¢ËÍÒøÐÐÕË»§¶¯ÕËÊý¾Ý£¬°üÀ¨Èô¸É·¢ËÍÒøÐÐÕË»§¶¯ÕËÊý¾ÝÏ…	Êý¾Ý·ÖÎö
Ò»ÖÖ¶à½ðÈÚÏµÍ³µÄÐÅÏ¢Í³Ò»ÊÕ¼¯¼à¿Ø·½·¨¼°ÏµÍ³	ÖÐÐÅÒøÐÐ¹É·ÝÓÐÏÞ¹«Ë¾	2020-11-13	2021-03-16	CN112506920A	Ö÷·ÖÀàºÅ£ºG06F16/22(20190101)	ÔÚÉó-¹«¿ª	100020 ±±¾©ÊÐ³¯ÑôÇø¹â»ªÂ·10ºÅ1ºÅÂ¥ÖÐÐÅ´óÏÃ20²ã	±¾·¢Ã÷Éæ¼°Ò»ÖÖ¶à½ðÈÚÏµÍ³µÄÐÅÏ¢Í³Ò»ÊÕ¼¯¼à¿Ø·½·¨¼°ÏµÍ³£¬Í¨¹ýÖÆ¶¨´¦ÀíÁ´µÄ·½·¨ÊµÏÖ¶Ô²»Í¬ÏµÍ³²»Í¬Êý¾ÝµÄ±ã½Ý»¯ÊÕ¼¯Óë¹ÜÀí£¬Ê¹²É¼¯µ½µÄÊý¾Ý¼È¿ÉÒÔÌáÏÖ²»Í¬ÏµÍ³µÄ²»Í¬ÌØÐÔ£¬Ò²ÄÜ¹»Í¬Ê±Âú×ã²»Í¬ÏµÍ³Ëù²É¼¯µ½µÄÊý¾ÝÄÜ¹»Í³Ò»ÕûÀí¡¢Í³Ò»´æ´¢¡¢Í³Ò»µ÷ÓÃ£¬±ÜÃâÊÕ¼¯ÈßÓàÊý¾Ý£¬Ìá¸ßÓÐÐ§Êý¾ÝÊÕ¼¯Ð§ÂÊ£¬Ê¹²É¼¯µ½µÄÊý¾Ý¸ü¼ÓÒ×ÓÚ·ÖÎö¡¢´¦Àí¼°Õ¹ÏÖ¡£	Êý¾Ý·ÖÎö
Ò»ÖÖ»ùÓÚÒøÐÐÒµµÄ²âÊÔ·çÏÕÔ¤¹ÀÄ£ÐÍµÄ¹¹½¨·½·¨¼°×°ÖÃ	ÖÐÐÅÒøÐÐ¹É·ÝÓÐÏÞ¹«Ë¾	2020-12-04	2021-02-09	CN112346995A	Ö÷·ÖÀàºÅ£ºG06F11/36(20060101)	ÔÚÉó-¹«¿ª	100020 ±±¾©ÊÐ³¯ÑôÇø¹â»ªÂ·10ºÅ1ºÅÂ¥ÖÐÐÅ´óÏÃ20²ã	±¾·¢Ã÷¹«¿ªÁËÒ»ÖÖ»ùÓÚÒøÐÐÒµµÄ²âÊÔ·çÏÕÔ¤¹ÀÄ£ÐÍµÄ¹¹½¨·½·¨¼°×°ÖÃ£¬»ñµÃµÚÒ»´ý²âÊÔÏµÍ³ÐÅÏ¢µÄÄ£¿éÐÅÏ¢µÄµÚÒ»È±ÏÝÂÊ£»»ñµÃËùÊöµÚÒ»´ý²âÊÔÏµÍ³ÐÅÏ¢µÄ¹ØÁªÏµÍ³µÄµÚ¶þÈ±ÏÝÂÊ£»½«ËùÊöµÚÒ»È±ÏÝÂÊºÍËùÊöµÚ¶þÈ±ÏÝÂÊ×÷ÎªÊäÈëÊý¾ÝÊäÈë²âÊÔ·çÏÕÔ¤¹ÀÄ£ÐÍ£¬ÆäÖÐ£¬ËùÊö²âÊÔ·çÏÕÔ¤¹ÀÄ£ÐÍÍ¨¹ý¶à×éÑµÁ·Êý¾ÝÑµÁ·»ñµÃ£¬ËùÊö¶à×éÖÐµÄÑµÁ·Êý¾ÝÖÐµÄÃ¿Ò»×éÑµÁ·Êý¾Ý¾ù°üÀ¨£ºËùÊöµÚÒ»È±ÏÝÂÊºÍËùÊöµÚ¶þÈ±ÏÝÂÊºÍÓÃÀ´±êÊ¶·çÏÕµÈ¼¶£»»ñµÃËùÊö²âÊÔ·çÏÕÔ¤¹ÀÄ£ÐÍµÄµ…	Êý¾Ý·ÖÎö
Ò»ÖÖ²úÆ·²âÊÔ·½·¨¼°×°ÖÃ	ÖÐ¹úÅ©ÒµÒøÐÐ¹É·ÝÓÐÏÞ¹«Ë¾	2020-12-17	2021-03-12	CN112486842A	Ö÷·ÖÀàºÅ£ºG06F11/36(20060101)	ÔÚÉó-¹«¿ª	100005 ±±¾©ÊÐ¶«³ÇÇø½¨¹úÃÅÄÚ´ó½Ö69ºÅ	±¾ÉêÇëÊµÊ©Àý¹«¿ªÁËÒ»ÖÖ²úÆ·²âÊÔ·½·¨¼°×°ÖÃ£¬ÆäÖÐ¸Ã·½·¨°üÀ¨£ºÈ·¶¨´ý²âÊÔµÄÄ¿±ê½ðÈÚ·þÎñ²úÆ·£»»ñÈ¡¶à¸öÓëÄ¿±ê½ðÈÚ·þÎñ²úÆ·Ïà¹ØµÄÎÊ¾íµ÷²éÐÅÏ¢£¬ÎÊ¾íµ÷²éÐÅÏ¢°üÀ¨ÓëºòÑ¡×Ô±äÁ¿Ïà¹ØµÄÎÊÌâ¶ÔÓ¦µÄÓÃ»§´ð¸´ÐÅÏ¢£¬ºòÑ¡×Ô±äÁ¿°üÀ¨¼¨Ð§ÆÚÍû¡¢Å¬Á¦ÆÚÍû¡¢Éç»áÓ°Ïì¡¢´Ù³ÉÒòËØ¡¢¶¨ÖÆ»¯ÆÚÍûºÍ°²È«ÆÚÍû£»»ùÓÚ¶à¸öÎÊ¾íµ÷²éÐÅÏ¢ÔÚºòÑ¡×Ô±äÁ¿ÖÐÈ·¶¨ÏÔÖø×Ô±äÁ¿£¬ÏÔÖø×Ô±äÁ¿ÊÇÄÜ¹»¶ÔÓÃ»§¶ÔÓÚÄ¿±ê½ðÈÚ·þÎñ²úÆ·µÄÊ¹ÓÃÒâÔ¸ºÍÊ¹ÓÃÐÐÎª²úÉúÄ¿±êÓ°ÏìÐ§¹ûµÄ×…	°²È«
¶ÔÍøÒ³½øÐÐËøÆÁµÄ·½·¨¡¢×°ÖÃ¼°ä¯ÀÀÆ÷	±±¾©Ææ»¢¿Æ¼¼ÓÐÏÞ¹«Ë¾	2013-02-01	2013-05-22	CN103116725A	Ö÷·ÖÀàºÅ£ºG06F21/57(2013.01)I	ÓÐÐ§-ÊÚÈ¨	100088 ±±¾©ÊÐÎ÷³ÇÇøÐÂ½Ö¿ÚÍâ´ó½Ö28ºÅD×ù112ÊÒ£¨µÂÊ¤Ô°Çø£©	±¾·¢Ã÷¹«¿ªÁËÒ»ÖÖ¶ÔÍøÒ³½øÐÐËøÆÁµÄ·½·¨¡¢×°ÖÃ¼°ä¯ÀÀÆ÷¡£ÆäÖÐ£¬·½·¨°üÀ¨£º·¢ÆðÍøÒ³ÇëÇó£¬Ïò°²È«·þÎñÆ÷·¢Æðµ±Ç°ÍøÒ³µÄ°²È«½á¹ûÐÅÏ¢µÄ»ñÈ¡ÇëÇó£»´Ó°²È«·þÎñÆ÷´¦»ñÈ¡µ±Ç°ÍøÒ³µÄÍøÖ·¶ÔÓ¦µÄ°²È«½á¹ûÐÅÏ¢£¬½«¸Ã°²È«½á¹ûÐÅÏ¢»º´æµ½±¾µØ£»¸ù¾Ýµ±Ç°ÍøÒ³µÄ°²È«½á¹ûÐÅÏ¢ÒÔ¼°ÖÁÉÙÒ»¸öµ±Ç°ÍøÒ³µÄ¸¸Ò³ÃæµÄ°²È«½á¹ûÐÅÏ¢£¬È·¶¨µ±Ç°ÍøÒ³ÊÇ·ñÎª°²È«µÄÖ§¸¶ÍøÒ³£»Èôµ±Ç°ÍøÒ³²»ÊÇ°²È«µÄÖ§¸¶ÍøÒ³£¬Ôò¶Ôµ±Ç°ÍøÒ³½øÐÐËøÆÁ´¦Àí¡£¸ù¾Ý±¾·¢Ã÷Ìá¹©µÄ·½°¸£¬µ±ÄÜ¹…	°²È«
Ò»ÖÖÓÃÓÚµç×Ó¶¯Ì¬¿ÚÁîµÄ¼¯³ÉµçÂ·½á¹¹	±±¾©Í¬·½Î¢µç×ÓÓÐÏÞ¹«Ë¾	2013-02-27	2014-08-27	CN104008323A	Ö÷·ÖÀàºÅ£ºG06F21/34(2013.01)I	Ê§Ð§-·¢Ã÷×¨ÀûÉêÇë¹«²¼ºóµÄÊÓÎª³·»Ø	100083 ±±¾©ÊÐº£µíÇøÇå»ªÍ¬·½¿Æ¼¼¹ã³¡A×ù29²ã	Ò»ÖÖÓÃÓÚµç×Ó¶¯Ì¬¿ÚÁîµÄ¼¯³ÉµçÂ·½á¹¹£¬Éæ¼°ÍøÉÏÒøÐÐ¼¼ÊõÁìÓò¡£±¾·¢Ã÷°üÀ¨Ö÷¿Øµ¥ÔªÒÔ¼°·Ö±ðÓëÖ÷¿Øµ¥ÔªÏà»¥Á¬½ÓµÄÊµÊ±Ê±ÖÓµ¥Ôª¡¢ÊäÈëÊä³öµ¥Ôª¡¢ÃÜÂëÔËËãºÍ´æ´¢µ¥ÔªºÍ³ÌÐòÊý¾Ý´æ´¢µ¥Ôª¡£ÒÔ¼°ÓëÍâ²¿Éè±¸Á¬½ÓµÄÍ¨ÓÃ´®ÐÐ×ÜÏßUSB½Ó¿ÚºÍÊäÈëµçÔ´¡£Í¬ÏÖÓÐ¼¼ÊõÏà±È£¬±¾·¢Ã÷¿ÉÒÔÍ¬Ê±ÊµÏÖµç×Ó¶¯Ì¬¿ÚÁîºÍÖÇÄÜÃÜÂëÔ¿³×µÄ¹¦ÄÜ£¬¾ßÓÐÊ¹ÓÃ·½±ã¡¢³É±¾µÍµÄÌØµã¡£	°²È«
°²È«ÈÏÖ¤ÖÕ¶ËUkey¡¢ÍøÒø²Ù×÷·½·¨¼°Éè±¸	½»Í¨ÒøÐÐ¹É·ÝÓÐÏÞ¹«Ë¾	2013-03-06	2013-07-24	CN103218716A	Ö÷·ÖÀàºÅ£ºG06Q20/40(2012.01)I	Ê§Ð§-·¢Ã÷×¨ÀûÉêÇë¹«²¼ºóµÄÊÓÎª³·»Ø	200120 ÉÏº£ÊÐÒø³ÇÖÐÂ·188ºÅ	±¾·¢Ã÷¹«¿ªÒ»ÖÖ°²È«ÈÏÖ¤ÖÕ¶ËUkey¡¢ÍøÒø²Ù×÷·½·¨¼°Éè±¸£¬¸Ã°²È«ÈÏÖ¤ÖÕ¶ËUkey°üÀ¨£º°²È«´æ´¢µ¥Ôª£¬ÓÃÓÚ´æ´¢¸öÈËÐÅÏ¢»òÖ¤Êé£»ºËÐÄ¼Ó½âÃÜÔËËãÐ¾Æ¬£¬Óë°²È«´æ´¢µ¥ÔªÁ¬½Ó£¬ÓÃÓÚÌá¹©ÃÜÂëÑéÖ¤¹¦ÄÜ£»Í¨ÓÃ´®ÐÐ×ÜÏßUSBÓÐÏßÍ¨ÐÅ½Ó¿Ú£¬ÓëºËÐÄ¼Ó½âÃÜÔËËãÐ¾Æ¬Á¬½Ó£¬ÓÃÓÚÒÔÓÐÏß·½Ê½´«ÊäÊý¾Ý£»ÎÞÏßÍ¨ÐÅ¿ØÖÆµ¥Ôª£¬ÓëºËÐÄ¼Ó½âÃÜÔËËãÐ¾Æ¬Á¬½Ó£»ÎÞÏßÍ¨ÐÅ½Ó¿Ú£¬ÓëÎÞÏßÍ¨ÐÅ¿ØÖÆµ¥ÔªÁ¬½Ó£¬ÓÃÓÚÒÔÎÞÏß·½Ê½´«ÊäÊý¾Ý£»ÎÞÏßÍ¨ÐÅ¿ØÖÆµ¥Ôª¼°ÎÞÏßÍ¨ÐÅ½Ó¿ÚÓÃÓÚÅäºÏ…	°²È«
Ò»ÖÖ¶àºÏÒ»µÄÊý×ÖÒÆ¶¯¿¨Æ¬¼°ÆäÊµÏÖ·½·¨	ÊæÎ¨¼Ò	2013-03-22	2013-07-24	CN103218646A	Ö÷·ÖÀàºÅ£ºG06K19/06(2006.01)I	Ê§Ð§-·¢Ã÷×¨ÀûÉêÇë¹«²¼ºóµÄ²µ»Ø	610000 ËÄ´¨Ê¡³É¶¼ÊÐ¸ßÐÂÇø×Ï¾£ÄÏÂ·54ºÅ2¶°2µ¥Ôª10ºÅ	±¾·¢Ã÷¹«¿ªÁËÒ»ÖÖ¶àºÏÒ»µÄÊý×ÖÒÆ¶¯¿¨Æ¬¼°ÆäÊµÏÖ·½·¨£¬½â¾öÁËÏÖ½×¶ÎÈËÃÇÔÚ³öÃÅÊ±ÐèÒªÐ¯´ø¶àÕÅ¿¨ÈÝÒ×Åªµô¡¢¼Ç´íÃÜÂëµÄÈ±ÏÝ£¬¸Ã¶àºÏÒ»µÄÊý×ÖÒÆ¶¯¿¨Æ¬°üÀ¨³äµçµç³Ø¡¢Óë³äµçµç³ØÏàÁ¬µÄÎ¢´¦ÀíÆ÷¡¢¾ùÓëÎ¢´¦ÀíÆ÷ÏàÁ¬µÄÂß¼­µ¥Ôª¡¢´æ´¢µ¥Ôª¡¢ÎÞÏßÊÕ·¢Ä£¿éºÍ/»òÉäÆµÊÕ·¢Ä£¿é¡¢ÏÔÊ¾µ¥ÔªºÍÖ¸ÎÆÊ¶±ðÆ÷£¬ÆäÖÐ³äµçµç³Ø»¹ÓëÎÞÏßÊÕ·¢Ä£¿éºÍ/»òÉäÆµÊÕ·¢Ä£¿é¡¢ÏÔÊ¾µ¥ÔªºÍÖ¸ÎÆÊ¶±ðÆ÷ÏàÁ¬£¬ÇÒ¸Ã³äµçµç³ØÉÏ»¹Á¬½ÓÓÐ³äµçºÍÊý¾Ý½»»»½Ó¿Ú£¬ÇÒ³äµçºÍÊý¾Ý½»»»½…	±£ÏÕ
Ò»ÖÖ¾ßÓÐUSB½Ó¿ÚµÄÖÇÄÜÉè±¸¼°Æä°²È«½»Ò×·½Ê½	Ò¦ÑåÁÖ	2013-04-15	2013-06-26	CN103177365A	Ö÷·ÖÀàºÅ£ºG06Q20/42(2012.01)I	Ê§Ð§-·¢Ã÷×¨ÀûÉêÇë¹«²¼ºóµÄÊÓÎª³·»Ø	518000 ¹ã¶«Ê¡ÉîÛÚÊÐÂÞºþÇøËÉÔ°Â·ºèÏè»¨Ô°2¶°B×ù702	±¾·¢Ã÷ÊÇÒ»ÖÖ¾ßÓÐUSB½Ó¿ÚµÄÖÇÄÜÉè±¸£¬ÓÉÇ¶ÈëÊ½CPU¡¢GPU¡¢ÄÚ´æÐ¾Æ¬¡¢´æ´¢Ð¾Æ¬¡¢¼Ó½âÃÜÐ¾Æ¬×é³É£¬¿ÉÒÔ¶ÀÁ¢ÓÚÓÃ»§µÄPC»ú¡¢Æ½°åµçÄÔ¡¢ÊÖ»ú¡¢ÖÇÄÜµçÊÓÒÔÔËÐÐÍøÉÏ½ðÈÚ½»Ò×³ÌÐò£¬µ«ÊÇ°Ñ¸ÃÖÇÄÜÉè±¸µÄÏÔÊ¾ÏµÍ³×ª»»Êä³öµ½ÓÃ»§PC»ú¡¢Æ½°åµçÄÔ¡¢ÊÖ»ú¡¢ÖÇÄÜµçÊÓµÄÆÁÄ»ÉÏ£¬Í¬Ê±°ÑÓÃ»§ÔÚPC»ú¡¢Æ½°åµçÄÔ¡¢ÊÖ»ú¡¢ÖÇÄÜµçÊÓÉÏµÄ¼üÅÌ¡¢Êó±ê¡¢´¥ÃþÆÁµÈ²Ù×÷ÊÂ¼þ×ª»»ÊäÈëµ½¸ÃÖÇÄÜÉè±¸ÖÐ£¬´Ó¶øÊµÏÖÔÚÓÃ»§µÄPC»ú¡¢Æ½°åµçÄÔ¡¢ÊÖ»ú¡¢ÖÇÄÜµçÊÓµÄÍ¼ÐÎ²Ù×÷ÏµÍ³ÉÏ…	°²È«
»ùÓÚPaaSÆ½Ì¨µÄÉí·ÝÈÏÖ¤·½·¨ÒÔ¼°Éí·ÝÈÏÖ¤Éè±¸	ÖÐ¹úÒøÁª¹É·ÝÓÐÏÞ¹«Ë¾	2013-04-22	2014-10-22	CN104113412A	Ö÷·ÖÀàºÅ£ºH04L9/32(2006.01)I	Ê§Ð§-·¢Ã÷×¨ÀûÉêÇë¹«²¼ºóµÄ²µ»Ø	200135 ÉÏº£ÊÐÆÖ¶«ÐÂÇøº¬Ð¦Â·36ºÅÒøÁª´óÏÃ	±¾·¢Ã÷¹«¿ªÁËÒ»ÖÖPaaSÆ½Ì¨ÉÏµÄÉí·ÝÈÏÖ¤Éè±¸£¬ËùÊöÉí·ÝÈÏÖ¤Éè±¸ÓÃÓÚ¶Ô×¼±¸·ÃÎÊËùÊöPaaSÆ½Ì¨ÉÏµÄÓ¦ÓÃµÄÓÃ»§½øÐÐÉí·ÝÈÏÖ¤£¬ËùÊöÉí·ÝÈÏÖ¤Éè±¸°üÀ¨£ºÃÜÔ¿·Ö·¢ÖÐÐÄ£¬ÓÃÓÚ¸ù¾ÝPaaSÆ½Ì¨ÉÏµÄÓ¦ÓÃµÄ¿ª·¢ÕßËùÖÆ¶¨µÄ·ÃÎÊ²ßÂÔ¶ÔÓÃ»§½øÐÐÈÏÖ¤²¢·Ö·¢Æ±¾Ý£¬ÆäÖÐ£¬ËùÊöÃÜÔ¿·Ö·¢ÖÐÐÄ°üÀ¨¼ø±ð·þÎñÆ÷£¬ËùÊö¼ø±ð·þÎñÆ÷ÅäÖÃ³É½ÓÊÕÀ´×ÔËùÊöÓÃ»§µÄÑéÖ¤ÇëÇó£»È·¶¨ËùÊöÓÃ»§µÄÉí·ÝËùÊôµÄÐ­Òé£»¸ù¾ÝËùÊöÐ­ÒéÀ´È·¶¨ËùÊöÓÃ»§µÄÑéÖ¤·½Ê½ÒÔ¼°ÔÚÑéÖ¤³É¹¦ºóÏòËùÊöÓÃ»…	°²È«
ÒÆ¶¯Ö§¸¶ÖÐÒ»ÖÖ»ùÓÚ´¥ÃþÆÁµÄÍ¼ÐÎ»¯ÃÜÂëÑéÖ¤·½·¨ÓëÏµÍ³	ÐìÃ÷ÁÁ	2013-04-24	2013-08-28	CN103268436A	Ö÷·ÖÀàºÅ£ºG06F21/36(2013.01)I	Ê§Ð§-·¢Ã÷×¨ÀûÉêÇë¹«²¼ºóµÄÊÓÎª³·»Ø	450000 ºÓÄÏÊ¡Ö£ÖÝÊÐ¶þÆßÇø´óÑ§±±Â·75ºÅ2001¼¶±¾¿Æ	±¾·¢Ã÷Éæ¼°ÒÆ¶¯Ö§¸¶ÖÐÒ»ÖÖ»ùÓÚ´¥ÃþÆÁµÄÍ¼ÐÎ»¯ÃÜÂëÑéÖ¤·½·¨ÓëÏµÍ³£¬°üÀ¨ÓÃ»§ÒÆ¶¯ÖÕ¶ËÄ£¿é¡¢ÒÆ¶¯½ðÈÚ·þÎñ½»Ò×ÖÐÐÄÄ£¿é¡¢ÒøÐÐ¿¨ÖÐÐÄÄ£¿é£¬ÆäÖÐÓÃ»§ÒÆ¶¯ÖÕ¶ËÄ£¿éÓëÒøÐÐ¿¨ÖÐÐÄÄ£¿éÖ®¼äËù²ÉÓÃµÄÎÞÏßÍøÂçÁª½Ó·½Ê½ÎªGMSÍøºÍ»òCDMAÍ¨ÐÅÍøºÍ»ò3GÒÆ¶¯Í¨ÐÅÍøºÍ»ò4GÒÆ¶¯Í¨ÐÅÍø£¬ÆäÖÐÒÆ¶¯½ðÈÚ·þÎñ½»Ò×ÖÐÐÄÄ£¿éÖÁÉÙÉèÖÃÓÐÊý¾Ý¿âÄ£¿é¡¢Í¨Ñ¶Ä£¿é¡¢±¨ÎÄÊý¾ÝÐ­Òé×ª»»Ä£¿é¡¢¼ÓÃÜºÍ½âÃÜÄ£¿é£¬±¾·¢Ã÷ÓÃÓÚÑéÖ¤ÃÜÂë£¬Í¨¹ý»ùÓÚ´¥ÃþÆÁµÄÍ¼ÐÎ»¯ÃÜÂëÑéÖ¤µÄ·½Ê½…	°²È«
Ò»ÖÖÖÇÄÜÃÜÔ¿Éè±¸µÄ¹¤×÷·½·¨	·ÉÌì³ÏÐÅ¿Æ¼¼¹É·ÝÓÐÏÞ¹«Ë¾	2013-04-27	2013-08-14	CN103246839A	Ö÷·ÖÀàºÅ£ºG06F21/34(2013.01)I	ÓÐÐ§-ÊÚÈ¨	100085 ±±¾©ÊÐº£µíÇøÑ§ÇåÂ·9ºÅ»ãÖÇ´óÏÃBÂ¥17²ã	±¾·¢Ã÷¹«¿ªÒ»ÖÖÖÇÄÜÃÜÔ¿Éè±¸µÄ¹¤×÷·½·¨£¬ÊôÓÚÐÅÏ¢°²È«ÁìÓò£¬ËùÊö·½·¨°üÀ¨£ºÉè±¸ÉÏµç³õÊ¼»¯£»Éè±¸¶ÁÈ¡À¶ÑÀÄ£¿é²ÎÊý£¬ÅÐ¶ÏÊÇ·ñÄÜ¹»³É¹¦¶ÁÈ¡À¶ÑÀÄ£¿é²ÎÊý£¬ÊÇÔò½«À¶ÑÀÄ£¿éÇÐ»»ÖÁÁ¬½Ó×´Ì¬£¬Ö´ÐÐÏÂÒ»²½£¬·ñÔòÖ±½ÓÖ´ÐÐÏÂÒ»²½£»Éè±¸ÅÐ¶Ï¹¤×÷µçÑ¹ÊÇ·ñµÍÓÚÔ¤ÉèÖµ£¬ÊÇÔòÌáÊ¾µÍµçÑ¹×´Ì¬£¬µÚÒ»Ô¤ÉèÊ±¼äºóÉè±¸¹Ø»ú£¬·ñÔòÉè±¸Ò»Ö±¼ì²â¹¤×÷µçÑ¹²¢µÈ´ýÖÐ¶Ï´¥·¢ÐÅºÅ£»µ±½ÓÊÕµ½ÖÐ¶Ï´¥·¢ÐÅºÅÔò¸ù¾ÝÖÐ¶Ï´¥·¢ÐÅºÅ½øÈëÏàÓ¦ÖÐ¶Ï£¬Ö´ÐÐÏàÓ¦ÖÐ¶Ï´¦ÀíºóÍË³öÏ…	°²È«
ÖÕ¶ËºÏ³ÉÃÜÂë	Íô·çÕä	2013-05-01	2014-03-26	CN103679935A	Ö÷·ÖÀàºÅ£ºG07F7/12(2006.01)I	Ê§Ð§-·¢Ã÷×¨ÀûÉêÇë¹«²¼ºóµÄÊÓÎª³·»Ø	427226 ºþÄÏÊ¡´ÈÀûÏØ¾°ÁúÇÅÏç¾®Èª´å9×é	ÖÕ¶ËºÏ³ÉÃÜÂëÊÇ²ÉÓÃ³Ö¿¨ÈËÊäÈëµÄÊý¾ÝÓëÒøÐÐ¿¨´øÓÐµÄÊý¾Ý½áºÏ£¬ÀûÓÃÒøÐÐ¿¨Ð¯´øµÄÊý¾ÝµÈ×÷ÎªÊý¾Ý±í»òÊý¾ÝÁ¬½ÓÂ·¾¶±äÁ¿£¬ÀûÓÃ¾ßÓÐÃÜÂëÔËËãÄÜÁ¦µÄÖÕ¶ËÉè±¸(¹ñÔ±»ú)µÈÉèÖÃÏàÓ¦µÄÊý¾Ý±íºÍÊý¾Ý£¬¾Ý´ËÒýÈëÖÕ¶Ë³ÌÐòµÄÊý¾Ý¶ø»ñµÃµÄÒ»ÖÖ¶àÃÜÂë£¬ÕâÖÖÃÜÂëÖ»ÐèÒªÒøÐÐ¿¨Ìá¹©·Ç³£¼òµ¥µÄÊý¾Ý¾ÍÄÜ»ñµÃ·Ç³£¸´ÔÓµÄÃÜÂë£¬ÆäÃÜÂëÔËËã½»ÓÉÖÕ¶Ë¼ÆËã»úÏµÍ³Íê³É£¬ÕâÑù£¬¾Í¿ÉÒÔÊ¹ÓÃÔ­ÀíÏà¶Ô¼òµ¥µÄ²»ÄÜ´«²¥²¡¶¾µÄ´Å¿¨ÀàÒøÐÐ¿¨£¬±ÜÃâÁËIC¿¨ÄÜ¹»Ð¯´ø»ò´«²¥²¡¶¾µ…	°²È«
´øÒøÐÐ¿¨²å¿ÚµÄµçÄÔ»úÏä¼°ÏàÓ¦µÄÒøÐÐ¿¨	Íô·çÕä	2013-05-01	2014-03-26	CN103679932A	Ö÷·ÖÀàºÅ£ºG07F7/08(2006.01)I	ÓÐÐ§-×¨ÀûÉêÇëÈ¨¡¢×¨ÀûÈ¨µÄ×ªÒÆ	427226 ºþÄÏÊ¡´ÈÀûÏØ¾°ÁúÇÅÏç¾®Èª´å9×é	´øÒøÐÐ¿¨²å¿ÚµÄµçÄÔ»úÏä¼°ÏàÓ¦µÄÒøÐÐ¿¨ÊÇµçÄÔ»úÏäÉÏÉèÖÃ×¨ÓÃµÄÒøÐÐ¿¨²å¿Ú»òÕßÊÇÀûÓÃUSBÊý¾Ý×ª½ÓÏß£¬¶ÁÈ¡´øÓÐ´æÖü¿¨»ò½Ó´¥Ê½IC¿¨µÄÒøÐÐ¿¨Êý¾Ý£¬¸úU¶ÜÔ­Àí²î²»¶à£¬ÕâÖÖÉè¼ÆÎª³Ö¿¨ÈËÍøÉÏÒøÐÐ½»Ò×Ãâ³ýÁË¹ºÂòU¶ÜµÄ×Ê½ð·ÑÓÃ£¬±ÈU¶ÜÒ²·½±ãÐ¯´ø£¬ÓÈÆäÊÊºÏÓÚ½Ó´¥Ê½IC¿¨¡£	°²È«
»ùÓÚÓïÒôÃÜÂëµÄµç×Ó¼ÇÊÂÊÖ³ÖÖÕ¶Ë	Ìì½òÌ¤ÀË¿Æ¼¼¹É·ÝÓÐÏÞ¹«Ë¾	2013-05-06	2013-09-04	CN103279648A	Ö÷·ÖÀàºÅ£ºG06F19/00(2011.01)I	Ê§Ð§-·¢Ã÷×¨ÀûÉêÇë¹«²¼ºóµÄÊÓÎª³·»Ø	301713 Ìì½òÊÐÎäÇåÇøÍõÇìÛçÕòÇìÔ´µÀ18ºÅ	Ò»ÖÖ»ùÓÚÓïÒôÃÜÂëµÄµç×Ó¼ÇÊÂÊÖ³ÖÖÕ¶Ë£¬°üÀ¨CPU¡¢Flash´¢´æÄ£¿é¡¢ÓïÒô¼ÓÃÜÄ£¿é¡¢ÓïÒôÊäÈëÄ£¿éºÍÓïÒôÊä³öÄ£¿é£»CPUµÄÊäÈë¶Ë¿ÚÓëÓïÒôÊäÈëÄ£¿éµÄÊä³ö¶Ë¿ÚÁ¬½Ó£¬CPUµÄÊä³ö¶Ë¿ÚÓëÓïÒôÊä³öÄ£¿éµÄÊäÈë¶Ë¿ÚÁ¬½Ó£¬Flash´¢´æÄ£¿éµÄÊä³ö¶Ë¿ÚÓëCPUµÄÊäÈë¶Ë¿ÚÁ¬½Ó£¬CPUµÄÊäÈë¶Ë¿ÚÓëÓïÒô¼ÓÃÜÄ£¿éµÄÊä³ö¶Ë¿ÚÁ¬½Ó¡£¸Ã×°ÖÃ½á¹¹¼òµ¥¡¢Ê¹ÓÃ·½±ã£¬ÓÃÓÚ´æ´¢ÒøÐÐ¿¨¿¨ºÅ¡¢ÃÜÂëµÈ¸öÈËÐÅÏ¢£¬Æä²ÉÓÃÓïÒôÊäÈëµÄ·½Ê½¼ÇÂ¼Êý¾ÝÐÅÏ¢£¬Í¨¹ý¼ÓÃÜµÄ·½Ê½ÊµÏÖÊý¾ÝµÄ±£ÃÜ…	°²È«
»ùÓÚÖ¸ÎÆÊ¶±ðµÄµç×Ó¼ÇÊÂÊÖ³ÖÖÕ¶Ë	Ìì½òÌ¤ÀË¿Æ¼¼¹É·ÝÓÐÏÞ¹«Ë¾	2013-05-06	2013-09-04	CN103279698A	Ö÷·ÖÀàºÅ£ºG06F21/32(2013.01)I	Ê§Ð§-·¢Ã÷×¨ÀûÉêÇë¹«²¼ºóµÄÊÓÎª³·»Ø	301713 Ìì½òÊÐÎäÇåÇøÍõÇìÛçÕòÇìÔ´µÀ18ºÅ	Ò»ÖÖ»ùÓÚÖ¸ÎÆÊ¶±ðµÄµç×Ó¼ÇÊÂÊÖ³ÖÖÕ¶Ë£¬°üÀ¨CPU¡¢Flash´¢´æÄ£¿é¡¢Ö¸ÎÆÊ¶±ðÄ£¿é¡¢ÓïÒôÊäÈëÄ£¿éºÍÓïÒôÊä³öÄ£¿é£»CPUµÄÊäÈë¶Ë¿ÚÓëÓïÒôÊäÈëÄ£¿éµÄÊä³ö¶Ë¿ÚÁ¬½Ó£¬CPUµÄÊä³ö¶Ë¿ÚÓëÓïÒôÊä³öÄ£¿éµÄÊäÈë¶Ë¿ÚÁ¬½Ó£¬Flash´¢´æÄ£¿éµÄÊä³ö¶Ë¿ÚÓëCPUµÄÊäÈë¶Ë¿ÚÁ¬½Ó£¬CPUµÄÊäÈë¶Ë¿ÚÓëÖ¸ÎÆÊ¶±ðÄ£¿éµÄÊä³ö¶Ë¿ÚÁ¬½Ó¡£±¾·¢Ã÷½á¹¹¼òµ¥¡¢Ê¹ÓÃ·½±ã£¬ÓÃÓÚ´æ´¢ÒøÐÐ¿¨¿¨ºÅ¡¢ÃÜÂëµÈ¸öÈËÐÅÏ¢£¬Æä²ÉÓÃÓïÒôÊäÈëµÄ·½Ê½¼ÇÂ¼Êý¾ÝÐÅÏ¢£¬Í¨¹ý¼ÓÃÜµÄ·½Ê½ÊµÏÖÊý¾ÝµÄ±£ÃÜ…	°²È«
Ö¸ÎÆÈÏÖ¤µç×ÓÉÌÎñÃÜÂëÆ÷	´óÁ¬Ãñ×åÑ§Ôº	2013-05-08	2013-08-21	CN103258158A	Ö÷·ÖÀàºÅ£ºG06F21/32(2013.01)I	Ê§Ð§-·¢Ã÷×¨ÀûÉêÇë¹«²¼ºóµÄÊÓÎª³·»Ø	116600 ÁÉÄþÊ¡´óÁ¬ÊÐ¾­¼Ã¼¼Êõ¿ª·¢ÇøÁÉºÓÎ÷Â·18ºÅ(´óÁ¬Ãñ×åÑ§Ôº)	Ò»ÖÖÖ¸ÎÆÈÏÖ¤µç×ÓÉÌÎñÃÜÂëÆ÷£¬°üÀ¨Ö¸ÎÆ²É¼¯²¿·Ö¡¢DSPÖ¸ÎÆ´¦Àí²¿·Ö¡¢Ö¸ÎÆ¼øÈ¨ÈÏÖ¤²¿·ÖºÍ¼øÈ¨½á¹ûÊä³ö²¿·Ö£¬Ö¸ÎÆ²É¼¯²¿·ÖÓÉFPC1011FµçÈÝÊ½°ëµ¼Ìå´«¸ÐÆ÷¹¹³É£¬Ö¸ÎÆ²É¼¯²¿·ÖÉèÖÃÔÚÃÜÂëÆ÷µÄ±íÃæ£¬²¢ºÍÃÜÂëÆ÷ÉÏµÄ¼üÅÌ¿ØÖÆ°´Å¥ºÍÏÔÊ¾Æ÷ÏàÁ¬£»DSPÖ¸ÎÆ´¦Àí²¿·Ö²ÉÓÃDSP?TMS320DM6437´¦ÀíÆ÷×÷ÎªÖ÷Ð¾Æ¬£¬²¢Í¬ÍâÎ§µçÂ·Á¬½Ó£¬ÇÒÔÚ¸Ã²¿·ÖÉèÓÐ´æ´¢Ö¸ÎÆÍ¼ÏñÐÅÏ¢µÄ´æ´¢Æ÷£»Ö¸ÎÆ¼øÈ¨ÈÏÖ¤²¿·ÖÎªÖ¸ÎÆÈÏÖ¤ÖÐÐÄ£»¼øÈ¨½á¹ûÊä³ö²¿·Ö½«Ö¸ÎÆ¶Ô±È½á¹ûÊä³öµ½ÃÜÂ…	°²È«
Ò»ÖÖ»ìºÏÊ½µç×ÓÉÌÎñ¼´Ê±Ö§¸¶·½·¨	ÖÐÉ½ÊÐÖÐÉÌ¸Û¿Æ¼¼ÓÐÏÞ¹«Ë¾	2013-05-25	2013-10-23	CN103366274A	Ö÷·ÖÀàºÅ£ºG06Q20/32(2012.01)I	Ê§Ð§-·¢Ã÷×¨ÀûÉêÇë¹«²¼ºóµÄÊÓÎª³·»Ø	528400 ¹ã¶«Ê¡ÖÐÉ½ÊÐÖÐÉ½ËÄÂ·Ê¢¾°ÉÐ·åA2×ù7²ã	±¾·¢Ã÷¹«¿ªÒ»ÖÖ»ìºÏÊ½µç×ÓÉÌÎñ¼´Ê±Ö§¸¶·½·¨£¬Ëü°üÀ¨½»Ò×¿Í»§¶ËÉêÇë²½Öè¡¢ÊÖ»ú°²×°½»Ò×¿Í»§¶Ë²½Öè¡¢Ö§¸¶µ××ù½øÐÐÓÃ»§ÉúÎïÌØÕ÷²É¼¯¡¢ÌØÕ÷ÌáÈ¡ºÍµÇ¼Ç²½Öè¡¢Ö§¸¶µ××ù½øÐÐÓÃ»§ÉúÎïÌØÕ÷ÓëÒøÐÐ¿¨ÃÜÂë°ó¶¨²½Öè¡¢½»Ò×ÕËµ¥Éú³ÉÓëÈ·ÈÏ²½Öè¡¢Ö§¸¶ÒøÐÐ¿¨ÐÅÏ¢»ñÈ¡²½Öè¡¢Í¨¹ýÖ§¸¶µ××ù²¢Æ¾½èÓÃ»§ÉúÎïÌØÕ÷½øÐÐÖ§¸¶ÊÚÈ¨²½Öè¡¢»»¿¨¼ÌÐøÖ§¸¶²½Öè£¬¿ÉÒÔÓÐÐ§·ÀÖ¹ÃÜÂë±»Ä¾ÂíµÁÈ¡µÄÎÊÌâ³öÏÖ£¬Í¨¹ýÊÖ»úÖ§¸¶¹ý³ÌÖÐ£¬±£ÁôÁËPOS»úµÄË¢¿¨ÌåÑé£¬Í¬Ê±Ö»ÐèÒª°´ÊÖÖ¸…	°²È«
Ò»ÖÖ»ùÓÚAndroidÖÇÄÜÒÆ¶¯ÖÕ¶ËµÄÍ¨ÐÅÃÜÔ¿·ÖÅä·½·¨	¿Æ´ó¹ú¶ÜÁ¿×Ó¼¼Êõ¹É·ÝÓÐÏÞ¹«Ë¾	2013-06-08	2018-06-12	CN108156180A	Ö÷·ÖÀàºÅ£ºH04L29/06(2006.01)I	ÓÐÐ§-ÊµÖÊÉó²éµÄÉúÐ§	230088 °²»ÕÊ¡ºÏ·ÊÊÐ¸ßÐÂÇøÍû½­Î÷Â·800ºÅºÏ·Ê´´ÐÂ²úÒµÔ°D3Â¥	±¾·¢Ã÷¹«¿ªÁËÒ»ÖÖ»ùÓÚAndroidÖÇÄÜÒÆ¶¯ÖÕ¶ËµÄÍ¨ÐÅÃÜÔ¿·ÖÅä·½·¨£¬Í¨¹ýÔÚAndroid²Ù×÷ÏµÍ³µÄµ×²ã½¨Á¢Í¨ÓÃ±£ÃÜÍ¨ÐÅÆ½Ì¨£¬Ê¹ÖÇÄÜÒÆ¶¯ÖÕ¶Ë¾ß±¸¿ÉÒÔÓë±£ÃÜÍ¨ÐÅÖ§³ÖÍøÂç½øÐÐ½»»¥£¬½ÓÊÕÁ½¼¶ÃÜÔ¿£¬²¢¶ÔÊÕµ½µÄÒµÎñÃÜÔ¿½øÐÐ½âÃÜºóÔÙÊ¹ÓÃµÄ¹¦ÄÜ£¬´Ó¶ø¿ÉÒÔÎªVoIP±£ÃÜµç»°¡¢±£ÃÜ¶ÌÐÅ¡¢±£ÃÜÊÓÆµÍ¨»°¡¢ÎÄ¼þ¼ÓÃÜ´«Êä¡¢°²È«ÒÆ¶¯Ö§¸¶ÒÔ¼°ÆäËûÐèÒª±£ÃÜÖ§³ÖµÄÍ¨ÐÅÒµÎñÌá¹©Í¨ÓÃµ×²ãÖ§³Å¡£±£ÃÜÍ¨ÐÅÖ§³ÖÍøÂçÎª¸ÄÔìºóµÄÖÇÄÜÒÆ¶¯ÖÕ¶ËÌá¹©¸÷ÖÖÍ¨ÐÅÒµÎñËùÐèµÄÒµÎ…	Ö§¸¶
ÓÃÓÚÍøÒø·þÎñµÄÍøÂç°²È«×°ÖÃºÍÏàÓ¦µÄÈÏÖ¤ÓÃ»§Éí·Ý·½·¨	»Æ½ð¸»ÖªÊ¶²úÈ¨×ÉÑ¯£¨ÉîÛÚ£©ÓÐÏÞ¹«Ë¾	2013-06-27	2014-12-31	CN104252589A	Ö÷·ÖÀàºÅ£ºG06F21/34(2013.01)I	Ê§Ð§-·¢Ã÷×¨ÀûÉêÇë¹«²¼ºóµÄÊÓÎª³·»Ø	518028 ¹ã¶«Ê¡ÉîÛÚÊÐ¸£ÌïÇø»ªÇ¿±±½ÖµÀ»ªÇ¿±±Â·ÉÏ²½¹¤ÒµÇøÅô»ùÉÏ²½¹¤Òµ³§·¿304¶°µÚÈý²ã¶«²à	Ò»ÖÖÓÃÓÚÍøÒø·þÎñµÄÍøÂç°²È«×°ÖÃºÍÏàÓ¦µÄÈÏÖ¤ÓÃ»§Éí·Ý·½·¨£¬ÔÚÉÏÍøÖÕ¶Ë(2)µÄÖ÷»ú(201)Óë¼üÅÌ(202)Ö®¼äÉèÖÃÍøÂç°²È«×°ÖÃ(1)£¬²¢½«Êý×ÖÖ¤Êé×°ÖÃ(3)Á¬½Óµ½ÍøÂç°²È«×°ÖÃ(1)£¬ÓÃ»§ÔÚÊ¹ÓÃÍøÉÏÒøÐÐ·þÎñ½øÐÐÕË»§²Ù×÷Ê±£¬ÓÉÍøÂç°²È«×°ÖÃ(1)½«ÓÃ»§´Ó¼üÅÌ(202)ÊäÈëµ½Ö÷»ú(201)µÄ¡°ÊäÈëÐÅÏ¢¡±Í¨¹ýÊý×ÖÖ¤Êé×°ÖÃ(3)½øÐÐÊý×ÖÇ©ÊðºÍ¼ÓÃÜ´«ËÍµ½ÍøÉÏÒøÐÐ·þÎñÆ÷(4)£¬Ö÷»ú(201)¸ù¾ÝÓÃ»§µÄ²Ù×÷Éú³É¡°ÕË»§²Ù×÷ÐÅÏ¢¡±£¬²¢Í¨¹ýÊý×ÖÖ¤Êé×°ÖÃ(3)½øÐÐÊý×ÖÇ©Êð…	°²È«
ÒÆ¶¯Éè±¸»ùÓÚÈËÁ³Ê¶±ðºÍÖÇÄÜ¿¨µÄÉí·ÝÑéÖ¤ÏµÍ³¼°·½·¨	¹«°²²¿µÚÈýÑÐ¾¿Ëù	2013-07-05	2013-09-25	CN103324879A	Ö÷·ÖÀàºÅ£ºG06F21/32(2013.01)I	ÓÐÐ§-ÊÚÈ¨	200031 ÉÏº£ÊÐÐì»ãÇøÔÀÑôÂ·76ºÅ	±¾·¢Ã÷Éæ¼°Ò»ÖÖÒÆ¶¯Éè±¸ÉÏ»ùÓÚÈËÁ³Ê¶±ðºÍÖÇÄÜ¿¨ÊµÏÖÉí·ÝÑéÖ¤¹¦ÄÜµÄÏµÍ³£¬ÆäÖÐ°üÀ¨ÓÃ»§½çÃæÄ£¿é¡¢ÈËÁ³Êý¾Ý²É¼¯Ä£¿é¡¢ÈËÁ³ÌØÕ÷ÐÅÏ¢ÌáÈ¡´¦ÀíÄ£¿é¡¢NFCÍ¨ÐÅÄ£¿éºÍ¼ÓÃÜÄ£¿é¡£±¾·¢Ã÷»¹Éæ¼°Ò»ÖÖÀûÓÃ¸ÃÏµÍ³ÊµÏÖÒÆ¶¯Éè±¸ÉÏ»ùÓÚÈËÁ³Ê¶±ðºÍÖÇÄÜ¿¨½øÐÐÉí·ÝÑéÖ¤¿ØÖÆµÄ·½·¨¡£²ÉÓÃ¸ÃÖÖÒÆ¶¯Éè±¸ÉÏ»ùÓÚÈËÁ³Ê¶±ðºÍÖÇÄÜ¿¨ÊµÏÖÉí·ÝÑéÖ¤¹¦ÄÜµÄÏµÍ³¼°Æä·½·¨£¬±£Ö¤ÁËÓÃ»§µÄ¸öÈËÒþË½°²È«£»ÄÜ¹»ÀûÓÃÒÆ¶¯Éè±¸µÄNFC¹¦ÄÜ¶ÁÈ¡ÖÇÄÜ¿¨ÉÏµÄÏà¹ØÐÅÏ¢£¬¾ßÓÐ·Ç½Ó´¥µÄÌ…	°²È«
Ò»ÖÖÒÆ¶¯Ö§¸¶Éè±¸	±±¾©Ðý¼«ÐÅÏ¢¼¼Êõ¹É·ÝÓÐÏÞ¹«Ë¾	2013-07-16	2013-10-09	CN103345686A	Ö÷·ÖÀàºÅ£ºG06Q20/34(2012.01)I	Ê§Ð§-·¢Ã÷×¨ÀûÉêÇë¹«²¼ºóµÄ²µ»Ø	100083 ±±¾©ÊÐº£µíÇø±±ËÄ»·ÖÐÂ·229ºÅº£Ì©´óÏÃ1006ÊÒ	Ò»ÖÖÒÆ¶¯Ö§¸¶Éè±¸£¬Éæ¼°µç×Ó¼¼ÊõÓ¦ÓÃÁìÓò£¬ÎªÁË¼ÈÂú×ã½ðÈÚ¼¯³ÉµçÂ·¿¨¹æ·¶£¬ÓÖÂú×ãÍøÉÏÒøÐÐÓ¦ÓÃÖÐµç×ÓÇ©ÃûµÄÐèÒª£¬±¾Ö§¸¶Éè±¸°üÀ¨µÚÒ»Êý×ÖÖ¤ÊéµçÂ·¡¢µÚ¶þÊý×ÖÖ¤ÊéµçÂ·¡¢¶ÁÐ´µçÂ·¡¢Í¨Ñ¶µçÂ·ºÍÖÐÑë¿ØÖÆÆ÷£»¶ÁÐ´µçÂ·Í¨¹ýµÚÒ»Êý×ÖÖ¤ÊéµçÂ·ÓëÖÐÑë¿ØÖÆÆ÷ÏàÁ¬£»ÓÃÓÚ¸ù¾Ý½ðÈÚ¼¯³ÉµçÂ·¿¨¹æ·¶µÄÒªÇóÌá¹©ËùÊöÊý×ÖÖ¤Êé£¬²¢ÔÚÖÐÑë¿ØÖÆÆ÷µÄÐ­ÖúÏÂÍê³É½ðÈÚ¼¯³ÉµçÂ·¿¨µÄ¿¨Æ¬½»Ò×ÈÏÖ¤£»µÚ¶þÊý×ÖÖ¤ÊéµçÂ·ºÍÍ¨Ñ¶µçÂ··Ö±ðÓëÖÐÑë¿ØÖÆÆ÷ÏàÁ¬£»ÊÕµ½µÄ½»Ò×Ð…	Ö§¸¶
»ùÓÚU¶ÜµÄ°²È«ÍøÒø·½·¨	¸£½¨öÎÅµÍ¨Ñ¶¼¼ÊõÓÐÏÞ¹«Ë¾	2013-07-18	2013-11-20	CN103400070A	Ö÷·ÖÀàºÅ£ºG06F21/34(2013.01)I	Ê§Ð§-·¢Ã÷×¨ÀûÉêÇë¹«²¼ºóµÄÊÓÎª³·»Ø	350000 ¸£½¨Ê¡¸£ÖÝÊÐ¹ÄÂ¥ÇøÈí¼þ´óµÀ89ºÅ	±¾·¢Ã÷Ìá¹©Ò»ÖÖ»ùÓÚU¶ÜµÄ°²È«ÍøÒø·½·¨£¬ËùÊöU¶Ü°üÀ¨Ò»U¶Ü±¾ÌåÒÔ¼°Ò»USB´æ´¢Æ÷£¬U¶Ü±¾Ìå°üÀ¨Ò»CPUºÍÒ»USB½Ó¿Ú£¬USB½Ó¿Ú¡¢CPUÒÔ¼°USB´æ´¢Æ÷Ë³´ÎÁ¬½Ó£¬ËùÊöUSB´æ´¢Æ÷ÄÚ°²×°ÓÐÍøÒø¿Í»§¶Ë³ÌÐò£¬ËùÊö°²È«ÍøÒø·½·¨¾ßÌåÎª£ºU¶ÜºÍ¼ÆËã»úÁ¬½Ó£¬¼ÆËã»ú½øÈëÃ¶¾Ù½×¶Î£¬¼ÆËã»úÏÔÊ¾U¶Ü±¾ÌåµÄÉè±¸·ûºÍUSB´æ´¢Éè±¸µÄÅÌ·û£¬µã»÷USB´æ´¢Éè±¸µÄÅÌ·û£¬´ò¿ªUSB´æ´¢Æ÷£¬Ö´ÐÐÍøÒø¿Í»§¶Ë³ÌÐò£¬ÊäÈëµÇÂ½ÐÅÏ¢£¬ÒøÐÐºóÌ¨ÑéÖ¤ËùÊöµÇÂ½ÐÅÏ¢²¢·µ»ØÑéÖ¤½á¹û£¬ÑéÖ¤Í…	°²È«
ºçÄ¤ÈÏÖ¤ÒøÐÐ¿¨	Ð»¼Ãºè	2013-07-20	2013-11-20	CN103400180A	Ö÷·ÖÀàºÅ£ºG06K19/073(2006.01)I	Ê§Ð§-·¢Ã÷×¨ÀûÉêÇë¹«²¼ºóµÄÊÓÎª³·»Ø	450002 ºÓÄÏÊ¡Ö£ÖÝÊÐ½ðË®Çø¾­ÎåÂ·25ºÅ2ºÅÂ¥36ºÅ	Ò»ÖÖ²ÉÓÃÈËÑÛºçÄ¤ÈÏÖ¤¼¼ÊõµÄÒøÐÐ¿¨¡£¸ÃÒøÐÐ¿¨²ÉÓÃ´æ´¢ÈÝÁ¿´óÓÚ16KµÄIC¿¨¡£Í¨¹ý½ÓÔÚÒøÐÐ¹ñÌ¨¼ÆËã»úÉÏµÄÉãÏñÍ·²É¼¯³Ö¿¨ÈË»ò´æÈ¡ÈËµÄºçÄ¤ÐÅÏ¢¡£Í¨¹ý½ÓÔÚÒøÐÐ¹ñÌ¨¼ÆËã»úÉÏµÄÐ´¿¨»ú°Ñ²É¼¯µÄµ½ºçÄ¤ÐÅÏ¢Ð´ÈëÒøÐÐ¿¨¡£Í¨¹ýÒøÐÐÄÚ²¿ÍøÂç°Ñ²ÉÈ¡µ½µÄºçÄ¤ÐÅÏ¢´æÈëÒøÐÐÊý¾ÝÖÐÐÄµÄ·þÎñÆ÷¡£³Ö¿¨ÈËÊ¹ÓÃATM»ú´æÈ¡¿î¡¢×ªÕË»òÕßË¢¿¨½É·ÑÊ±£¬Í¨¹ý½ÓÔÚATM»ú»òÕßÊÕ¿î»úÉÏµÄÉãÏñÍ·²É¼¯Ê¹ÓÃÈËµÄºçÄ¤ÐÅÏ¢£¬Í¨¹ýATM×Ô´øµÄ¶Á¿¨»ú»òÕß½ÓÔÚÊÕ¿î»úÉÏµÄ¶Á¿¨»ú¶ÁÈ¡Ò…	°²È«
Ò»ÖÖ»ùÓÚÒÆ¶¯ÖÕ¶ËµÄ½ðÈÚÔÆ°²È«·þÎñÆ½Ì¨ºÍÊý¾Ý±£»¤·½·¨	±±¾©ÖÐ¿Æ½ð²Æ¿Æ¼¼¹É·ÝÓÐÏÞ¹«Ë¾	2013-07-30	2014-01-22	CN103532927A	Ö÷·ÖÀàºÅ£ºH04L29/06(2006.01)I	Ê§Ð§-·¢Ã÷×¨ÀûÉêÇë¹«²¼ºóµÄ²µ»Ø	100083 ±±¾©ÊÐº£µíÇøÑ§ÔºÂ·51ºÅÂ¥Ê×Ïí¿Æ¼¼´óÏÃ6²ã	±¾·¢Ã÷Ìá³öÁËÒ»ÖÖ»ùÓÚÒÆ¶¯ÖÕ¶ËµÄ½ðÈÚÔÆ°²È«·þÎñÆ½Ì¨ºÍÊý¾Ý±£»¤·½·¨£¬¸ÃÆ½Ì¨°üÀ¨£ºÒÆ¶¯ÖÕ¶Ë°²È«¿Í»§¶Ë¡¢¿Í»§¶Ë½Ó¿Ú¡¢½ðÈÚÔÆ°²È«·þÎñºóÌ¨ºÍ·þÎñ¶Ë½Ó¿Ú£¬ÒÆ¶¯ÖÕ¶Ë°²È«¿Í»§¶ËÍ¨¹ý¿Í»§¶Ë½Ó¿ÚÓë½ðÈÚÔÆ°²È«·þÎñºóÌ¨½øÐÐ°²È«Í¨ÐÅ£¬²¢Í¨¹ý·þÎñ¶Ë½Ó¿ÚÊµÏÖºÍµÚÈý·½µÄ°²È«Á¬½ÓÒÔ¼°Êý¾Ý´«Êä£¬ÒÆ¶¯ÖÕ¶Ë°²È«¿Í»§¶ËÓÃÓÚÎªÒÆ¶¯ÖÕ¶ËÌá¹©·À»¤·þÎñ£¬½ðÈÚÔÆ°²È«·þÎñºóÌ¨ÄÜ¹»¶ÔÒÆ¶¯½ðÈÚ½»Ò×µÄÎ£ÏÕ½øÐÐÊµÊ±²É¼¯¡¢·ÖÎöºÍ´¦Àí£¬±¾·¢Ã÷¿ÉÒÔ¶ÔÒýÆðÒÆ¶¯½ðÈÚ°²È…	°²È«
Ò»ÖÖÊØÑººË²é»ú	ËÕÖÝÊÐÌØÖÖÊØÑº±£°²·þÎñ¹«Ë¾ÕÅ¼Ò¸Û·Ö¹«Ë¾	2013-08-26	2014-01-01	CN103488921A	Ö÷·ÖÀàºÅ£ºG06F21/30(2013.01)I	Ê§Ð§-·¢Ã÷×¨ÀûÉêÇë¹«²¼ºóµÄÊÓÎª³·»Ø	215600 ½­ËÕÊ¡ËÕÖÝÊÐÕÅ¼Ò¸ÛÊÐ¾­¼Ã¿ª·¢Çø£¨ÑîÉáÕò³¤°²±±Â·£©ËÕÖÝÊÐÌØÖÖÊØÑº±£°²·þÎñ¹«Ë¾ÕÅ¼Ò¸Û·Ö¹«Ë¾	±¾·¢Ã÷¹«¿ªÁËÒ»ÖÖ¿ÉÒÔ½«¿îÏäºÍ¿î°üÉÏµÄµç×Ó±êÇ©ÐÅÏ¢ÒÔ¼°µ±Ç°µÄÎ»ÖÃÐÅÏ¢ÊµÊ±´«ËÍµ½ÊØÑººË²éÖÐÐÄ´¦Àí»úµÄÊØÑººË²é»ú£¬°üÀ¨:Î¢´¦ÀíÆ÷ÒÔ¼°ÓëÎ¢´¦ÀíÆ÷ÏàÁ¬µÄÏÔÊ¾µ¥Ôª¡¢°´¼üµ¥Ôª¡¢ÍøÂçÍ¨ÐÅ½Ó¿Ú¡¢ÒÆ¶¯´æ´¢Æ÷½Ó¿Ú¡¢ÃÜÔ¿ÅÌ½Ó¿ÚÒÔ¼°À¶ÑÀÍ¨ÐÅ½Ó¿Ú»ò/ºÍ´®ÐÐÍ¨ÐÅ½Ó¿Ú¡¢ÎÞÏß¶¨Î»Í¨ÐÅ½Ó¿Ú¡£ËùÊöµÄÊØÑººË²é»úÖ÷ÒªÓÃÓÚÒøÐÐµÈ½ðÈÚÏµÍ³ÖÐ¡£	Êý¾Ý·ÖÎö
ÍøÉÏÒøÐÐºçÄ¤ÈÏÖ¤·½·¨	Ð»¼Ãºè	2013-09-08	2013-12-11	CN103440448A	Ö÷·ÖÀàºÅ£ºG06F21/32(2013.01)I	Ê§Ð§-·¢Ã÷×¨ÀûÉêÇë¹«²¼ºóµÄÊÓÎª³·»Ø	450002 ºÓÄÏÊ¡Ö£ÖÝÊÐ½ðË®Çø¾­ÎåÂ·25ºÅ2ºÅÂ¥36ºÅ	Ò»ÖÖÍøÉÏÒøÐÐºçÄ¤ÈÏÖ¤·½·¨¡£ÓÃ»§µ½ÒøÐÐ¹ñÌ¨°ìÀí¿ªÍ¨ÍøÉÏÒøÐÐ»òÕß±ä¸üÍøÉÏÒøÐÐ²Ù×÷È¨ÏÞÊ±£¬Í¨¹ýÁ¬½ÓÔÚÒøÐÐ¹ñÌ¨¼ÆËã»úÉÏµÄÉãÏñÍ·²É¼¯ÓÃ»§µÄÑÛ¾¦ºçÄ¤ÐÅÏ¢£¬´¦Àíºó¾­ÓÉÒøÐÐÄÚ²¿ÍøÂç´æÈëÒøÐÐÊý¾ÝÖÐÐÄµÄ·þÎñÆ÷¡£ÓÃ»§Ê¹ÓÃÍøÉÏÒøÐÐÊ±£¬Í¨¹ýÁ¬½ÓÔÚÓÃ»§¼ÆËã»úÉÏµÄÉãÏñÍ·²É¼¯Ê¹ÓÃÕßµÄÑÛ¾¦ºçÄ¤ÐÅÏ¢£¬´¦ÀíºóÓëÍ¨¹ý»¥ÁªÍø´ÓÒøÐÐÊý¾ÝÖÐÐÄ·þÎñÆ÷ÉÏ¶ÁÈ¡µÄÏàÓ¦ÕË»§Ô¤ÁôºçÄ¤Êý¾Ý½øÐÐ±È¶Ô¡£±È¶Ô½á¹ûÒ»ÖÂÔòÔÊÐí½øÐÐÍøÉÏÒøÐÐ²Ù×÷£¬²»Ò»ÖÂÔò²»ÔÊÐí½øÐÐÍøÉ…	°²È«
Ó¦ÓÃÆ½Ì¨ÓëÊý¾ÝÒøÐÐ·ÖÀë°ó¶¨µÄ·½·¨¼°ÏµÍ³	³¤É³Ô£°îÈí¼þ¿ª·¢ÓÐÏÞ¹«Ë¾	2013-09-24	2014-01-01	CN103491092A	Ö÷·ÖÀàºÅ£ºH04L29/06(2006.01)I	ÓÐÐ§-ÊÚÈ¨	410002 ºþÄÏÊ¡³¤É³ÊÐÌìÐÄÇøÎåÒ»´óµÀ717ºÅÎåÒ»ÐÂ¸ÉÏß3Â¥	±¾·¢Ã÷¹«¿ªÒ»ÖÖÓ¦ÓÃÆ½Ì¨ÓëÊý¾ÝÒøÐÐ·ÖÀë°ó¶¨µÄ·½·¨¼°ÏµÍ³£¬°üÀ¨£ºA¡¢µÚÒ»¿Í»§¶Ë½ÓÊÕÓ¦ÓÃÆ½Ì¨ÕËºÅ¼°ÃÜÂë£¬»ñÈ¡µ±Ç°Éè±¸µÄMACµØÖ·£¬¼ì²âÆäÊÇ·ñÒÑ°ó¶¨Ó¦ÓÃÆ½Ì¨ÕËºÅ£¬Èô·ñÖ´ÐÐ²½ÖèB£¬ÈôÊÇÖ´ÐÐ²½ÖèC£»B¡¢°ó¶¨MACµØÖ·ÓëÓ¦ÓÃÆ½Ì¨ÕËºÅÖ´ÐÐ²½ÖèC£»C¡¢¸³Óè·ÃÎÊÆ½Ì¨Êý¾ÝÈ¨ÏÞ£»D¡¢µÚ¶þ¿Í»§¶Ë½ÓÊÕÊý¾ÝÒøÐÐÕËºÅ¼°ÃÜÂë£¬»ñÈ¡µ±Ç°Éè±¸MACµØÖ·£¬¼ì²âÆäÊÇ·ñÒÑ°ó¶¨Êý¾ÝÒøÐÐÕËºÅ£¬Èô·ñÖ´ÐÐ²½ÖèE£¬ÈôÊÇÖ´ÐÐ²½ÖèF£»E¡¢°ó¶¨MACµØÖ·ÓëÊý¾ÝÒøÐÐÕËºÅ£¬Ö´ÐÐ²½Ö…	°²È«
ÀûÓÃ±¸ÓÃÊÖ»úÊµÏÖ±£»¤Êý¾Ý°²È«µÄ·½·¨¼°ÏµÍ³	³¤É³Ô£°îÈí¼þ¿ª·¢ÓÐÏÞ¹«Ë¾	2013-09-24	2014-01-08	CN103501292A	Ö÷·ÖÀàºÅ£ºH04L29/06(2006.01)I	ÓÐÐ§-ÊÚÈ¨	410002 ºþÄÏÊ¡³¤É³ÊÐÌìÐÄÇøÎåÒ»´óµÀ717ºÅÎåÒ»ÐÂ¸ÉÏß3Â¥	±¾·¢Ã÷¹«¿ªµÄÀûÓÃ±¸ÓÃÊÖ»úÊµÏÖ±£»¤Êý¾Ý°²È«µÄ·½·¨¼°ÏµÍ³£¬Í¨¹ý½«Ó¦ÓÃÆ½Ì¨ºÍÊý¾ÝÒøÐÐ·Ö±ðÓëÏàÓ¦µÄ¹¤×÷ÊÖ»ú¡¢±¸ÓÃÊÖ»ú½øÐÐ°ó¶¨£¬´Ó¶øÊ¹Êý¾ÝÒøÐÐºÍÓ¦ÓÃÆ½Ì¨°ó¶¨ÔÚ²»Í¬µÄ¹¤×÷ÊÖ»úºÍ±¸ÓÃÊÖ»úÉÏ£¬Èç´ËÒ»À´£¬µ±ÓÃ»§ÒÅÊ§Ó¦ÓÃÆ½Ì¨ÃÜÂë¡¢ÕË»§¡¢Êý¾ÝÒøÐÐÃÜÂë»òÕË»§Ê±£¬Í¨¹ý¹¤×÷ÊÖ»úºÍ±¸ÓÃÊÖ»úÊµÏÖÏàÓ¦µÄÃÜÂëºÍ/»òÕË»§µÄÕÒ»Ø£¬´Ó¶øÔÚÈ·±£ÓÃ»§µÄÓ¦ÓÃÆ½Ì¨ºÍÊý¾ÝÒøÐÐµÄ°²È«ÐÔµÄÇ°ÌáÏÂ£¬½â¾öÁËÓÃ»§Òì³£µÇÂ¼µÄÎÊÌâ£¬Âú×ãÁË¶ÔÊý¾Ý°²È«ÒªÇó¸ßµÄÓÃ»§Ðè…	°²È«
°Ñ¹Ø¼ü×Ö¶ÎÐÅÏ¢ºÏ²¢¼ÓÃÜ±£´æÊµÏÖÐÅÏ¢°²È«±£´æµÄ·½·¨	½­ËÕÖÇÈíÐÅÏ¢¿Æ¼¼ÓÐÏÞ¹«Ë¾	2013-09-26	2015-04-15	CN104517073A	Ö÷·ÖÀàºÅ£ºG06F21/78(2013.01)I	Ê§Ð§-·¢Ã÷×¨ÀûÉêÇë¹«²¼ºóµÄÊÓÎª³·»Ø	212001 ½­ËÕÊ¡Õò½­ÊÐ¾©¿ÚÇøµ¤Í½Â·118ºÅ¾©¿ÚÈí¼þÔ°1Â¥	±¾·¢Ã÷Éæ¼°ÐÅÏ¢°²È«¼¼ÊõÔÚÒøÐÐÐÐÒµÄÚµÄÈí¼þÏµÍ³ÖÐÊµ¼ÊÓ¦ÓÃ£¬°Ñ¹Ø¼ü±íÖÐÖ÷Òª×Ö¶Î½øÐÐºÏ²¢Ê¹ÓÃDES¼ÓÃÜ³ÉÒ»¸ö×Ö·û´®´æ´¢µ½Ä³Ò»ÌØ¶¨×Ö¶ÎÖÐ£¬µ±¼ÇÂ¼ÐÅÏ¢·¢Éú±ä»¯Ê±£¬ÐÅÏ¢ÏµÍ³»áÖØÐÂÉú³É¼ÓÃÜ×Ö·û´®£¬ÕâÑùÀ´±£Ö¤Êý¾ÝÐÅÏ¢Ò»ÖÂÐÔ£¬ÈçÊý¾Ý¿âDBAÓÃ»§ÔÚºóÌ¨ÐÞ¸ÄÐÅÏ¢¼ÇÂ¼Ê±£¬ÓÉÓÚÎÞ·¨ÐÞ¸Ä¼ÓÃÜ×Ö¶Î£¬ÐÅÏ¢ÏµÍ³±È¶ÔÖ®ºó¾Í»á·¢ÏÖ±¾ÐÞ¸ÄµÄ¼ÇÂ¼²¢¿ÉÒÔ¼°Ê±»Ö¸´Êý¾Ý¡£Í¨¹ýÕâÖÖ·½·¨Éè¼Æ³öÀ´µÄÐÅÏ¢ÏµÍ³¿ÉÒÔ·ÀÖ¹ºÏ·¨»ò·Ç·¨µÄÊý¾Ý¿âDBAÓÃ»§ÔÚÊý¾Ý¿âÖÐÖ±½ÓÐÞ…	°²È«
²ÆÎñ±¨±íÈí¼þËæÉíÅÌ	Ì«²ÖËÕÒ×ÐÅÏ¢¿Æ¼¼ÓÐÏÞ¹«Ë¾	2013-09-27	2014-01-01	CN103489071A	Ö÷·ÖÀàºÅ£ºG06Q10/06(2012.01)I	ÓÐÐ§-·¢Ã÷×¨ÀûÉêÇë¹«²¼ºóµÄ²µ»Ø	215400 ½­ËÕÊ¡ËÕÖÝÊÐÌ«²Ö¾­¼Ã¿ª·¢Çø±±¾©Â·88ºÅ	±¾·¢Ã÷¹«¿ªÁËÒ»ÖÖ²ÆÎñ±¨±íÈí¼þËæÉíÅÌ£¬°üÀ¨£ºÃÜÂëµÇÂ½´°¿Ú¡¢Êý¾ÝÊäÈëÕûÀíÄ£¿é¡¢±¨±íÉú³ÉÄ£¿éºÍUSBÉÁ´æÇý¶¯Æ÷£¬ËùÊöµÄÃÜÂëµÇÂ½´°¿Ú°üÀ¨ÃÜÂëµÄÉè¶¨¡¢ÐÞ¸ÄºÍµÇÂ½´°¿Ú£¬ËùÊöµÄÃÜÂëµÇÂ½´°¿Ú¡¢Êý¾ÝÊäÈëÕûÀíÄ£¿é¡¢±¨±íÉú³ÉÄ£¿é°²×°ÔÚUSBÉÁ´æÇý¶¯Æ÷ÀïÃæ£¬ËùÊöµÄÃÜÂëµÇÂ½´°¿ÚÓëÊý¾ÝÊäÈëÕûÀíÄ£¿éÏàÍ¨Ñ¶£¬ËùÊöµÄÊý¾ÝÊäÈëÕûÀíÄ£¿éÓë±¨±íÉú³ÉÄ£¿éÏàÍ¨Ñ¶¡£Í¨¹ýÉÏÊö·½Ê½£¬±¾·¢Ã÷Ö¸³öµÄ²ÆÎñ±¨±íÈí¼þËæÉíÅÌ£¬Ê¹ÓÃÊ±°ÑUSBÉÁ´æÇý¶¯Æ÷²å½øµçÄÔ£¬ÃÜÂëÊä…	°²È«
Ò»ÖÖÓÃÓÚ¸öÈËÐÅÓÃ±¨¸æµÄ×ÔÖú·þÎñ»ú	±±¾©ÐÅÁ¢ºÏ´´ÐÅÏ¢¼¼ÊõÓÐÏÞ¹«Ë¾	2013-09-29	2014-01-08	CN103500201A	Ö÷·ÖÀàºÅ£ºG06F17/30(2006.01)I	Ê§Ð§-·¢Ã÷×¨ÀûÉêÇë¹«²¼ºóµÄÊÓÎª³·»Ø	100102 ±±¾©ÊÐ³¯ÑôÇø¶«ÑÇÍû¾©ÖÐÐÄA×ù3309ÊÒ	±¾·¢Ã÷Éæ¼°Ò»ÖÖÓÃÓÚ¸öÈËÐÅÓÃ±¨¸æµÄ×ÔÖú·þÎñ»ú£¬°üÀ¨¹¤¿ØÖ÷»ú£¬·Ö±ðÓëËùÊö¹¤¿ØÖ÷»úÏàÁ¬µÄÉí·ÝÐÅÏ¢¶ÁÈ¡×°ÖÃ¡¢Éí·ÝÐÅÏ¢¼ø±ð×°ÖÃ¡¢µÚÒ»ÉãÏñ×°ÖÃ¡¢Ô¤ÉèÉí·ÝÐÅÏ¢Ä£¿é¡¢Ó²ÅÌÂ¼Ïñ»úÒÔ¼°ÏÔÊ¾ÆÁ£¬ËùÊöÓ²ÅÌÂ¼Ïñ»ú°üÀ¨µÚ¶þÉãÏñ×°ÖÃ£¬ËùÊöÓÃÓÚ¸öÈËÐÅÓÃ±¨¸æµÄ×ÔÖú·þÎñ»ú»¹°üÀ¨´òÓ¡»ú¡¢·¢Éù×°ÖÃºÍ²Ù×÷Ãæ°å£¬ËùÊö·¢Éù×°ÖÃºÍËùÊöÏÔÊ¾ÆÁ·Ö±ðÉèÖÃÔÚËùÊö²Ù×÷Ãæ°åÉÏ¡£±¾·¢Ã÷µÄÓÐÒæÐ§¹ûÔÚÓÚ£¬Ìá¹©Ò»ÖÖ·½±ã¡¢°²È«¡¢¿ì½ÝÒÔ¼°ÊµÓÃµÄÓÃÓÚ²éÑ¯²¢¿É´òÓ¡¸öÈËÐÅÓ…	°²È«
Ò»ÖÖ½ðÈÚ½»Ò×°²È«ÈÏÖ¤ÏµÍ³	ÕÅ¼Ò¸ÛÊÐËÙ´ïµç×ÓÉÌÎñÓÐÏÞ¹«Ë¾	2013-09-30	2014-01-29	CN103544598A	Ö÷·ÖÀàºÅ£ºG06Q20/40(2012.01)I	Ê§Ð§-·¢Ã÷×¨ÀûÉêÇë¹«²¼ºóµÄÊÓÎª³·»Ø	215600 ½­ËÕÊ¡ËÕÖÝÊÐÕÅ¼Ò¸Û¾­¼Ã¿ª·¢Çø¸ßÐÂ¼¼Êõ´´Òµ·þÎñÖÐÐÄA315ÊÒ	±¾·¢Ã÷¹«¿ªÁËÒ»ÖÖ½ðÈÚ½»Ò×°²È«ÈÏÖ¤ÏµÍ³£¬ËùÊöÏµÍ³°üÀ¨¿Í»§¶ËºÍ·þÎñÆ÷£¬ËùÊö¿Í»§¶ËÍ¨¹ýÍøÂçÓë·þÎñÆ÷Á¬½Ó£¬ËùÊö¿Í»§¶Ë°üÀ¨¿ØÖÆÆ÷¡¢Ö¸ÎÆ²É¼¯Ä£¿éºÍÍ¨ÐÅÄ£¿é£¬ËùÊöÖ¸ÎÆ²É¼¯Ä£¿éÓÃÓÚ²É¼¯ÓÃ»§µÄÖ¸ÎÆ£¬ËùÊöÍ¨ÐÅÄ£¿éÓÃÓÚ¿Í»§¶ËÓë·þÎñÆ÷Ö®¼äµÄÍ¨ÐÅ£»ËùÊöÖ¸ÎÆ²É¼¯Ä£¿éºÍÍ¨ÐÅÄ£¿é¾ùÓëËùÊö¿ØÖÆÆ÷Á¬½Ó£»ËùÊö·þÎñÆ÷°üÀ¨ÈÏÖ¤×°ÖÃºÍÓëËùÊöÈÏÖ¤×°ÖÃÁ¬½ÓµÄÊÚÈ¨×°ÖÃ¡£±¾·¢Ã÷ÊµÏÖÁËÖ¸ÎÆºÍ¼üÅÌÊäÈëÃÜÂëµÄË«ÖØÈÏÖ¤£¬ÓÉÓÚÖ¸ÎÆÎªÈËÌåµÄÎ¨Ò»ÐÔÉúÎïÌØÕ÷£¬¹Ê±…	°²È«
Ò»ÖÖÇý¶¯°ü°²×°·½·¨¡¢Éú³É·½·¨¡¢Ö§¸¶×°ÖÃ¼°Çý¶¯·þÎñÆ÷	ÒøÁªÉÌÎñÓÐÏÞ¹«Ë¾	2013-10-29	2014-01-22	CN103530554A	Ö÷·ÖÀàºÅ£ºG06F21/51(2013.01)I	Ê§Ð§-·¢Ã÷×¨ÀûÉêÇë¹«²¼ºóµÄ²µ»Ø	201203 ÉÏº£ÊÐÆÖ¶«ÐÂÇøÕÅ½­¸ß¿Æ¼¼Ô°ÇøÕÅºâÂ·1006ºÅ	±¾·¢Ã÷ÊµÊ©ÀýÌá¹©Ò»ÖÖÇý¶¯°ü°²×°·½·¨¡¢Éú³É·½·¨¡¢Ö§¸¶×°ÖÃ¼°Çý¶¯·þÎñÆ÷£¬ËùÊöÇý¶¯°ü°²×°·½·¨°üÀ¨ÒÔÏÂ²½Öè£ºÓ¦ÓÃÄ£¿é»ñÈ¡Ö§¸¶×°ÖÃµÄÅäÖÃÐÅÏ¢£»Ó¦ÓÃÄ£¿éËÑË÷Çý¶¯¼¯ºÏ£¬²¢´ÓÇý¶¯¼¯ºÏÏÂÔØÓëÅäÖÃÐÅÏ¢Æ¥ÅäµÄÇý¶¯°ü£»Ó¦ÓÃÄ£¿é½«Çý¶¯°ü°²×°µ½Ö§¸¶×°ÖÃ£»ËùÊöÇý¶¯°üÉú³É·½·¨°üÀ¨ÒÔÏÂ²½Öè£ºÕë¶ÔÅäÖÃÐÅÏ¢ÖÆ¶¨Çý¶¯³ÌÐò£¬²¢½«Çý¶¯³ÌÐò·â×°ÎªÇý¶¯°ü£»½«Çý¶¯°ü±£´æÖÁÇý¶¯¼¯ºÏ¡£	Ö§¸¶
»ùÓÚÈËÁ³Ê¶±ðµÄÍøÉÏÒøÐÐµÇÂ¼ÏµÍ³	´óÁ¬ÉúÈÝÏí¿Æ¼¼ÓÐÏÞ¹«Ë¾	2013-10-29	2014-01-29	CN103544424A	Ö÷·ÖÀàºÅ£ºG06F21/32(2013.01)I	Ê§Ð§-·¢Ã÷×¨ÀûÉêÇë¹«²¼ºóµÄ²µ»Ø	116000 ÁÉÄþÊ¡´óÁ¬ÊÐÉ³ºÓ¿ÚÇø¸»ÃñÂ·120ºÅ405ÊÒ	±¾·¢Ã÷¹«¿ªÁËÒ»ÖÖ»ùÓÚÈËÁ³Ê¶±ðµÄÍøÉÏÒøÐÐµÇÂ¼ÏµÍ³£¬°üÀ¨Í¼Ïñ²É¼¯×°ÖÃÒÔ¼°ÓëËùÊöÍ¼Ïñ²É¼¯×°ÖÃÅäºÏÊ¹ÓÃµÄ¿ØÖÆÏµÍ³£¬Í¼Ïñ²É¼¯×°ÖÃÓë¿ØÖÆÏµÍ³ÎÞÏßÊý¾ÝÍ¨ÐÅ£¬¿ØÖÆÏµÍ³Í¨¹ý»¥ÁªÍøÓëÍøÉÏÒøÐÐ¿ØÖÆ¶ËÊý¾ÝÍ¨ÐÅ£»Í¼Ïñ²É¼¯×°ÖÃ°üÀ¨¹âÔ´ºÍÍ¼Ïñ´«¸ÐÆ÷£¬Í¼Ïñ´«¸ÐÆ÷ÉÏÉèÖÃÓÐºìÍâÂË¹âÆ¬£»¿ØÖÆÏµÍ³°üÀ¨µÇÂ¼ÇëÇóµ¥Ôª¡¢ÐÅÏ¢ÊäÈëµ¥Ôª¡¢´¦Àíµ¥ÔªºÍÍ¼ÏñÐÅÏ¢ÏÔÊ¾µ¥Ôª¡£ÀûÓÃÍ¼Ïñ²É¼¯×°ÖÃ²É¼¯ÓÃ»§µÄÈËÁ³Í¼ÏñÐÅÏ¢£¬½«¸ÃÐÅÏ¢ÔÚ¿ØÖÆÏµÍ³ÄÚ¾­¹ý´¦Àíºó´æ´¢£¬µ±ÓÃ»…	Êý¾Ý·ÖÎö
Ò»ÖÖÖ§¸¶ÑéÖ¤·½·¨¡¢×°ÖÃºÍÏµÍ³	ÌÚÑ¶¿Æ¼¼£¨ÉîÛÚ£©ÓÐÏÞ¹«Ë¾	2013-10-29	2015-04-29	CN104580125A	Ö÷·ÖÀàºÅ£ºH04L29/06(2006.01)I	ÔÚÉó-ÊµÖÊÉó²éµÄÉúÐ§	518000 ¹ã¶«Ê¡ÉîÛÚÊÐ¸£ÌïÇøÕñÐËÂ·Èü¸ñ¿Æ¼¼Ô°2¶°¶«403ÊÒ	±¾·¢Ã÷ÊµÊ©Àý¹«¿ªÁËÒ»ÖÖÖ§¸¶ÑéÖ¤·½·¨¡¢×°ÖÃºÍÏµÍ³£¬ÆäÖÐ£¬·½·¨°üÀ¨£ºµ±¼ì²âµ½Ö§¸¶²Ù×÷Ê±£¬»ñÈ¡Ö§¸¶ÐÅÏ¢£»ÔÚ»ñÈ¡µ½ËùÊöÖ§¸¶ÐÅÏ¢ºó£¬Êä³öÓÃÓÚÌáÊ¾ÊäÈëÖ¸ÎÆµÄÌáÊ¾ÏûÏ¢£¬²¢É¨ÃèÊäÈëµÄÖÁÉÙÁ½¸öÖ¸ÎÆ£¬µÃµ½ÖÁÉÙÁ½¸öÖ¸ÎÆÐÅÏ¢£»»ùÓÚËùÊöÖ§¸¶ÐÅÏ¢ºÍËùÊöÖÁÉÙÁ½¸öÖ¸ÎÆÐÅÏ¢Ïò·þÎñÆ÷·¢ËÍÐ¯´ø¸¶¿îÕËºÅºÍËùÊö¸¶¿îÕËºÅµÄÑéÖ¤ÐÅÏ¢µÄÖ§¸¶ÇëÇó£¬ÒÔÊ¹ËùÊö·þÎñÆ÷ÔÚËùÊöÖÁÉÙÁ½¸öÖ¸ÎÆÐÅÏ¢ºÍËùÊöÑéÖ¤ÐÅÏ¢¶¼ÑéÖ¤Í¨¹ýºó£¬ÓÉËùÊö·þÎñÆ÷´¦ÀíËùÊöÖ§¸¶ÇëÇó¡£±¾·¢Ã…	°²È«
»ùÓÚÍ¼ÐÎ±àÂëµÄÒøÐÐÒµÎñÐÅÓÃÈÏÖ¤¼°·ÀÎ±Ê¶±ðÏµÍ³	Öì½Ü	2013-10-30	2015-05-06	CN104599178A	Ö÷·ÖÀàºÅ£ºG06Q40/02(2012.01)I	Ê§Ð§-·¢Ã÷×¨ÀûÉêÇë¹«²¼ºóµÄÊÓÎª³·»Ø	210004 ½­ËÕÊ¡ÄÏ¾©ÊÐÇØ»´Çøï÷ÁêÂ·101´å4ºÅ602ÊÒ	±¾·¢Ã÷Í¨¹ýÔÚÒøÐÐ½»Ò×ÖÐÒýÈë¿ÉÒÔ´«µÝ¼ÓÃÜÐÅÏ¢µÄÍ¼ÐÎ±àÂë£¬·¢Ã÷ÁËÒ»ÖÖ¿ÉÒÔ¶Ô½»Ò×µÄ½»Ò×Ë«·½£¨ÊÕ¿î·½ºÍ¸¶¿î·½£©µÄ¿Í»§ÐÅÏ¢¡¢½»Ò×ÐÅÏ¢½øÐÐ·ÖÎöºË¶Ô£¬ÊµÏÖÒµÎñÐÅÓÃÈÏÖ¤¼°·ÀÎ±Ê¶±ðµÄÏµÍ³¡£	°²È«
Ò»ÖÖÓ¦ÓÃÓÚÊÖ»úµÄÍøÉÏÒøÐÐ¹ÜÀíÏµÍ³	´óÁ¬ÖÇÓÑÈí¼þ¿Æ¼¼ÓÐÏÞ¹«Ë¾	2013-10-31	2015-05-06	CN104599179A	Ö÷·ÖÀàºÅ£ºG06Q40/02(2012.01)I	Ê§Ð§-·¢Ã÷×¨ÀûÉêÇë¹«²¼ºóµÄÊÓÎª³·»Ø	116000 ÁÉÄþÊ¡´óÁ¬ÊÐÉ³ºÓ¿ÚÇø»ÆºÓÂ·552ºÅ2µ¥Ôª3²ã2ºÅ	±¾·¢Ã÷¹«¿ªÁËÒ»ÖÖÓ¦ÓÃÓÚÊÖ»úµÄÍøÉÏÒøÐÐ¹ÜÀíÏµÍ³£¬¸¶¿îÇëÇóµ¥Ôª¡¢ÊäÈëµ¥Ôª¡¢¿ØÖÆµ¥Ôª¡¢ÏÔÊ¾µ¥ÔªºÍ´æ´¢µ¥Ôª£»µ±ÓÃ»§Í¨¹ýÊÖ»ú½øÈë»¥ÁªÍøÐèÒª½øÈëÓÃ»§µÄ¸öÈËÍøÉÏÒøÐÐ½øÐÐÒµÎñ°ìÀíÊ±£¬½øÈë±¾ÏµÍ³µÄÇëÇóµ¥Ôª£¬·¢³öÇëÇó½øÈëÍøÉÏÒøÐÐµÄÉêÇëÐÅÏ¢£»ËùÊö¿ØÖÆµ¥Ôª½ÓÊÕ¸ÃÉêÇëÐÅÏ¢£¬²¢½«¸ÃÐÅÏ¢Í¨¹ý»¥ÁªÍø´«ËÍÖÁÍøÉÏÒøÐÐÏµÍ³£¬ÍøÉÏÒøÐÐÏµÍ³·¢³ö»Ø¸´ÐÅÏ¢£¬Í¨ÖªÓÃ»§ÊäÈë¸ÃÒøÐÐ¿¨µÄÏà¹ØÐÅÏ¢£¬ÓÃ»§Í¨¹ýÊäÈëµ¥ÔªÊäÈëÏà¹ØÐÅÏ¢½øÈëÍøÉÏÒøÐÐÏµÍ³½øÐÐÒµÎñ°…	°²È«
Ð¾Æ¬ÖÐµÖÓùÄ£°å¹¥»÷µÄÊý¾Ý´«Êä·½·¨	ÉÏº£»ªºç¼¯³ÉµçÂ·ÓÐÏÞÔðÈÎ¹«Ë¾	2013-11-20	2015-05-27	CN104657680A	Ö÷·ÖÀàºÅ£ºG06F21/70(2013.01)I	Ê§Ð§-·¢Ã÷×¨ÀûÉêÇë¹«²¼ºóµÄÊÓÎª³·»Ø	201203 ÉÏº£ÊÐÆÖ¶«ÐÂÇø±Ì²¨Â·572Åª39ºÅ	±¾·¢Ã÷¹«¿ªÁËÒ»ÖÖÐ¾Æ¬ÖÐµÖÓùÄ£°å¹¥»÷µÄÊý¾Ý´«Êä·½·¨£¬°üÀ¨ÈçÏÂ²½Öè£º²½Öè1.Ñ¡ÔñÒ»¸öËæ»úÊý²ÎÊýstartflag×÷ÎªËæ»úÆðÊ¼Î»ÖÃ£»²½Öè2.½«ÏÂÃæËùÓÐµÄ²Ù×÷¹ý³Ì·Ö¸î3¸ö½×¶Î·Ö±ð½øÐÐ£»µÚ1½×¶Î£¬Ö´ÐÐµÚÒ»´Î´«Êä£¬¼´´ÓËæ»úÎ»ÖÃ¿ªÊ¼´«Êä£¬Ö±ÖÁÊý¾ÝµÄÆðÊ¼¶Ë»òÕßÄ©¶Ë£»µÚ2½×¶Î£¬Ö´ÐÐµÚ¶þ´Î´«Êä£¬¼´´«ÊäµÚÒ»¸öÊý¾Ý»òÕß×îºóÒ»¸öÊý¾Ý£»µÚ3½×¶Î£¬Ö´ÐÐµÚÈý´ÎµÄ´«Êä£¬¼´´ÓµÚ¶þ¸öÊý¾Ý»òÕßµ¹ÊýµÚ¶þ¸öÊý¾Ý¿ªÊ¼´«Êä£¬Ö±ÖÁËæ»úÆðÊ¼Î»ÖÃ¡£±¾·¢Ã÷ÄÜ¹»ÓÐÐ§µÖÓù…	°²È«
Ò»ÖÖ¶à¹¦ÄÜÍøÒø°²È«µÇÂ¼Æ÷¼°ÆäÊµÏÖ·½·¨	»Ý¹«	2013-11-21	2015-03-25	CN104462928A	Ö÷·ÖÀàºÅ£ºG06F21/35(2013.01)I	Ê§Ð§-·¢Ã÷×¨ÀûÉêÇë¹«²¼ºóµÄÊÓÎª³·»Ø	100085 ±±¾©ÊÐº£µíÇøÐÅÏ¢Â·ÉÏµØÄÏ¿Ú¿ÆÃ³´óÏÃ206ÊÒ	Ò»ÖÖ¶à¹¦ÄÜÍøÒø°²È«µÇÂ¼Æ÷¼°ÆäÊµÏÖ·½·¨£¬ÓÉÍâ¿Ç»ùÌå¡¢±ãÐ¯¿×¡¢NFCÌìÏß¡¢½ðÈÚICÐ¾Æ¬¼°Æä°üº¬µÄ´æ´¢Æ÷¡¢USB¶Ë×Ó¼°µÇÂ¼ÍøÂçÒøÐÐµÄ¿Í»§¶ËÈí¼þÁù²¿·Ö×é³É¡£Ê¹ÓÃÕâÖÖÁ½ÓÃÍøÒø°²È«µÇÂ¼Æ÷¼°ÆäÊµÏÖ·½·¨£¬µÇÂ¼ÍøÂçÒøÐÐ¡¢µÚÈý·½Ö§¸¶»òÕßÊÖ»úÒøÐÐ²»ÔÙÖ±½ÓÊ¹ÓÃä¯ÀÀÆ÷ÊäÈëÍøÖ·ºÍÓÃ»§Ãû»ò¿¨ºÅ£¬Ò²ÎÞÐèÍ¨¹ýËÑË÷ÒýÇæ»òÆäËüÍøÕ¾Á´½Óµ¼ÈëµÇÂ¼ÍøÒø¡£ÕâÑù£¬²»µ«³¹µ×±ÜÃâÁËÔÚÍøÉÏÖ§¸¶Ê±Ð¹Â©ÕË»§¡¢¿¨ºÅ¡¢ÃÜÂë£¬ÔâÓöµöÓãÆÛÕ©µÄ²»°²È«Òþ»¼·çÏÕ£¬»¹ÄÜ¹»ÔÚÈÎº…	°²È«
¾ßÓÐÖ¸ÎÆÊ¶±ðµÄ¹ÉÆ±»úÉí·ÝÊ¶±ð·½·¨	Î÷°²ºã·Éµç×Ó¿Æ¼¼ÓÐÏÞ¹«Ë¾	2013-11-26	2015-06-03	CN104680416A	Ö÷·ÖÀàºÅ£ºG06Q40/04(2012.01)I	ÔÚÉó-ÊµÖÊÉó²éµÄÉúÐ§	710068 ÉÂÎ÷Ê¡Î÷°²ÊÐÑãËþÇø°×É³Â·1ºÅ°×É³ÉÌÎñÂ¥220ÊÒ	±¾·¢Ã÷Éæ¼°¾ßÓÐÖ¸ÎÆÊ¶±ðµÄ¹ÉÆ±»úÉí·ÝÊ¶±ð·½·¨£¬ÌØ±ðÊÇÒ»ÖÖ»ùÓÚÆ½°åµçÄÔµÄ¶àÃ½Ìå·½Ê½µÄ¹ÉÆ±»úÉí·ÝÊ¶±ð·½·¨£¬ÆäÌØÕ÷ÊÇ£ºÖÁÉÙ°üÀ¨´«¸ÐÆ÷ºÍÆ½°åµçÄÔÖ÷»ú»úÉí£¬´«¸ÐÆ÷ÓëÆ½°åµçÄÔÖ÷»ú»úÉí½Ó¿ÚµçÁ¬½Ó£»Í¨¹ý´«¸ÐÆ÷½øÐÐÉí·ÝÐÅºÅÊ¶±ðºó£¬½øÈëÆ½°åµçÄÔÖ÷»ú»úÉí¹ÉÆ±»úÓ¦ÓÃ³ÌÐò¡£ËüÖ÷ÒªÊÇ½«¶àÃ½Ìå·½Ê½µÄÉí·ÝÊ¶±ð·½·¨Ó¦ÓÃµ½¹ÉÆ±»úµÄÉí·ÝÊ¶±ðÉÏ£¬´Ó¶ø´ó´óÌáÉý¹ÉÆ±»úÊ¹ÓÃµÄ°²È«ÐÔ¡£	°²È«
Ò»ÖÖ¹ÉÆ±»úÉí·ÝÊ¶±ð·½·¨	Î÷°²ºã·Éµç×Ó¿Æ¼¼ÓÐÏÞ¹«Ë¾	2013-11-26	2014-04-30	CN103761671A	Ö÷·ÖÀàºÅ£ºG06Q40/04(2012.01)I	ÔÚÉó-ÊµÖÊÉó²éµÄÉúÐ§	710068 ÉÂÎ÷Ê¡Î÷°²ÊÐÑãËþÇø°×É³Â·1ºÅ°×É³ÉÌÎñÂ¥220ÊÒ	±¾·¢Ã÷Éæ¼°Ò»ÖÖ¹ÉÆ±»úÉí·ÝÊ¶±ð·½·¨£¬ÌØ±ðÊÇÒ»ÖÖ»ùÓÚÆ½°åµçÄÔµÄ¶àÃ½Ìå·½Ê½µÄ¹ÉÆ±»úÉí·ÝÊ¶±ð·½·¨£¬ÆäÌØÕ÷ÊÇ£ºÖÁÉÙ°üÀ¨´«¸ÐÆ÷ºÍÆ½°åµçÄÔÖ÷»ú»úÉí£¬´«¸ÐÆ÷ÓëÆ½°åµçÄÔÖ÷»ú»úÉí½Ó¿ÚµçÁ¬½Ó£»Í¨¹ý´«¸ÐÆ÷½øÐÐÉí·ÝÐÅºÅÊ¶±ðºó£¬½øÈëÆ½°åµçÄÔÖ÷»ú»úÉí¹ÉÆ±»úÓ¦ÓÃ³ÌÐò¡£ËüÖ÷ÒªÊÇ½«¶àÃ½Ìå·½Ê½µÄÉí·ÝÊ¶±ð·½·¨Ó¦ÓÃµ½¹ÉÆ±»úµÄÉí·ÝÊ¶±ðÉÏ£¬´Ó¶ø´ó´óÌáÉý¹ÉÆ±»úÊ¹ÓÃµÄ°²È«ÐÔ¡£	°²È«
¾ßÓÐÍ¼ÏñÊ¶±ðµÄ¹ÉÆ±»úÉí·ÝÊ¶±ð·½·¨	Î÷°²ºã·Éµç×Ó¿Æ¼¼ÓÐÏÞ¹«Ë¾	2013-11-26	2015-06-03	CN104680417A	Ö÷·ÖÀàºÅ£ºG06Q40/04(2012.01)I	ÔÚÉó-ÊµÖÊÉó²éµÄÉúÐ§	710068 ÉÂÎ÷Ê¡Î÷°²ÊÐÑãËþÇø°×É³Â·1ºÅ°×É³ÉÌÎñÂ¥220ÊÒ	±¾·¢Ã÷Éæ¼°¾ßÓÐÍ¼ÏñÊ¶±ðµÄ¹ÉÆ±»úÉí·ÝÊ¶±ð·½·¨£¬ÌØ±ðÊÇÒ»ÖÖ»ùÓÚÆ½°åµçÄÔµÄ¶àÃ½Ìå·½Ê½µÄ¹ÉÆ±»úÉí·ÝÊ¶±ð·½·¨£¬ÆäÌØÕ÷ÊÇ£ºÖÁÉÙ°üÀ¨´«¸ÐÆ÷ºÍÆ½°åµçÄÔÖ÷»ú»úÉí£¬´«¸ÐÆ÷ÓëÆ½°åµçÄÔÖ÷»ú»úÉí½Ó¿ÚµçÁ¬½Ó£»Í¨¹ý´«¸ÐÆ÷½øÐÐÉí·ÝÐÅºÅÊ¶±ðºó£¬½øÈëÆ½°åµçÄÔÖ÷»ú»úÉí¹ÉÆ±»úÓ¦ÓÃ³ÌÐò¡£ËüÖ÷ÒªÊÇ½«¶àÃ½Ìå·½Ê½µÄÉí·ÝÊ¶±ð·½·¨Ó¦ÓÃµ½¹ÉÆ±»úµÄÉí·ÝÊ¶±ðÉÏ£¬´Ó¶ø´ó´óÌáÉý¹ÉÆ±»úÊ¹ÓÃµÄ°²È«ÐÔ¡£	°²È«
Ò»ÖÖ·ÀÖ¹¶ñÒâ³ÌÐò¹¥»÷ÍøÂçÖ§¸¶Ò³ÃæµÄ·½·¨¼°×°ÖÃ	±±¾©Ææ»¢¿Æ¼¼ÓÐÏÞ¹«Ë¾	2013-11-28	2014-02-26	CN103605924A	Ö÷·ÖÀàºÅ£ºG06F21/56(2013.01)I	ÓÐÐ§-ÊÚÈ¨	100088 ±±¾©ÊÐÎ÷³ÇÇøÐÂ½Ö¿ÚÍâ´ó½Ö28ºÅD×ù112ÊÒ£¨µÂÊ¤Ô°Çø£©	±¾·¢Ã÷Éæ¼°ÍøÂçÍ¨ÐÅ¼¼ÊõÁìÓò£¬Æä¹«¿ªÁËÒ»ÖÖ·ÀÖ¹¶ñÒâ³ÌÐò¹¥»÷ÍøÂçÖ§¸¶Ò³ÃæµÄ·½·¨¼°×°ÖÃ£¬¸Ã·½·¨°üÀ¨£º¼ì²âä¯ÀÀÆ÷Ëù·ÃÎÊµÄÒ³ÃæÊÇ·ñÎªÍøÂçÖ§¸¶Ò³Ãæ£»µ±¼ì²âµ½ä¯ÀÀÆ÷Ëù·ÃÎÊµÄÒ³ÃæÎªÍøÂçÖ§¸¶Ò³ÃæÊ±£¬¼à²âÊÇ·ñ´æÔÚ¶ñÒâ³ÌÐò·ÃÎÊËùÊöä¯ÀÀÆ÷µÄÐÐÎª£»µ±¼à²âµ½ËùÊö¶ñÒâ³ÌÐò·ÃÎÊËùÊöä¯ÀÀÆ÷µÄÐÐÎªÊ±£¬À¹½ØËùÊö¶ñÒâ³ÌÐò¡£ÓÉ´Ë£¬Ò»µ©¼ì²âµ½ä¯ÀÀÆ÷Ëù·ÃÎÊµÄÒ³ÃæÎªÍøÂçÖ§¸¶Ò³Ãæ£¬Ôò¼ÓÇ¿¶Ôä¯ÀÀÆ÷µÄ¼à²â£¬ÒÔ±ãÈ·¶¨ÔÚä¯ÀÀÆ÷·ÃÎÊÍøÂçÖ§¸¶Ò³ÃæµÄ¹ý³ÌÖÐÊÇ·…	°²È«
ä¯ÀÀÆ÷ÖÐ¼ÓÔØÖ§¸¶ÀàÍøÒ³µÄ·½·¨Óë×°ÖÃ	±±¾©Ææ»¢¿Æ¼¼ÓÐÏÞ¹«Ë¾	2013-12-05	2014-03-19	CN103646211A	Ö÷·ÖÀàºÅ£ºG06F21/53(2013.01)I	Ê§Ð§-·¢Ã÷×¨ÀûÉêÇë¹«²¼ºóµÄ²µ»Ø	100088 ±±¾©ÊÐÎ÷³ÇÇøÐÂ½Ö¿ÚÍâ´ó½Ö28ºÅD×ù112ÊÒ£¨µÂÊ¤Ô°Çø£©	±¾·¢Ã÷Ìá¹©ÁËÒ»ÖÖä¯ÀÀÆ÷ÖÐ¼ÓÔØÖ§¸¶ÀàÍøÒ³µÄ·½·¨Óë×°ÖÃ£¬¸Ã·½·¨°üÀ¨£ºÔÚä¯ÀÀÆ÷É³ÏäÍâÆô¶¯ä¯ÀÀÆ÷¿ò¼Ü½ø³Ì£¬ÒÔ±ã½«¿ò¼Ü½ø³ÌÖÐ²úÉúµÄ²Ù×÷£¬ÔÚÉ³ÏäÍâ½øÐÐ´¦Àí£»¼ì²âµ½ä¯ÀÀÆ÷µ±Ç°ÇëÇó·ÃÎÊµÄÍøÒ³ÊÇÖ§¸¶ÀàÍøÒ³£»½Ø»ñä¯ÀÀÆ÷¿ò¼Ü½ø³Ì´´½¨µÄÓÃÓÚ¼ÓÔØÖ§¸¶ÀàÍøÒ³µÄä¯ÀÀÆ÷½ø³Ì£¬²¢½«ä¯ÀÀÆ÷½ø³Ì·ÅÈëä¯ÀÀÆ÷É³ÏäÄÚÔËÐÐÒÔÍê³ÉÍøÂçÖ§¸¶µÄ´¦Àí¡£±¾·¢Ã÷Ìá¸ßÁËÊ¹ÓÃä¯ÀÀÆ÷½øÐÐÔÚÏßÖ§¸¶µÄ°²È«ÐÔ¡£	°²È«
Ò»ÖÖÓÃÉí·ÝÖ¤½øÐÐ×ÔÖú×¢²áµÄÊÖ»úÒøÐÐÈÏÖ¤·½·¨¼°ÏµÍ³	ÍõÃÀ½ð	2013-12-05	2014-03-26	CN103686729A	Ö÷·ÖÀàºÅ£ºH04W12/06(2009.01)I	ÓÐÐ§-ÊÚÈ¨	528100 ¹ã¶«Ê¡·ðÉ½ÊÐÈýË®ÇøÎ÷ÄÏ½ÖµÀÉ³Í·´óµÀ15ºÅ°ë½­»¨Ô°7×ù804	±¾·¢Ã÷ÊµÊ©ÀýÌá¹©ÁËÒ»ÖÖ±ã½ÝµØÓÃÉí·ÝÖ¤½øÐÐ×ÔÖú×¢²áµÄÊÖ»úÒøÐÐÈÏÖ¤·½·¨¼°ÏµÍ³£¬¸Ã·½·¨°üÀ¨£º×¢²áÊÖ»úÒøÐÐ²½ÖèºÍµÇÂ¼ÊÖ»úÒøÐÐ²½Öè£»ÆäÖÐ£¬×¢²áÊÖ»úÒøÐÐ²½Öè°üÀ¨£ºÓÃ»§ÊäÈë³õÊ¼ÃÜÂë£¬ÓÃÊÖ»úÒøÐÐ¿Í»§¶ËÅÄÉãÉí·ÝÖ¤Õý·´Ãæ²¢OCR³öÆäÖÐÎÄ×ÖºÍÈËÏñ£»ÅÄÉã×¢²áÕßÃæ²¿ÊÓÆµ£»¶ÁÈ¡ÊÖ»úSIM¿¨ÐÅÏ¢ºÍÓ²¼þÐÅÏ¢£»¶ÁÈ¡ÊÖ»úÎ»ÖÃÐÅÏ¢£»½¨Á¢ÉÏÊöÐÅÏ¢ÓëÊÖ»úÒøÐÐ×¢²á¿Í»§ÐÅÏ¢µÄ°ó¶¨¹ØÏµ£»µÇÂ¼ÊÖ»úÒøÐÐ²½Öè°üÀ¨£ºÓÃ»§ÓÃÊÖ»úÒøÐÐ¿Í»§¶ËÅÄÉã±¾ÈËÃæ²¿ÊÓÆµ£¬¶ÁÈ…	°²È«
Ò»ÖÖÖ§¸¶×¨ÓÃÂ·ÓÉÆ÷¼°Æä¼ÓÃÜÖ§¸¶ÐÅÏ¢µÄ·½·¨	¸£½¨ÁªµÏÉÌÓÃÉè±¸ÓÐÏÞ¹«Ë¾	2013-12-09	2014-02-26	CN103605931A	Ö÷·ÖÀàºÅ£ºG06F21/62(2013.01)I	ÓÐÐ§-ÊÚÈ¨	350000 ¸£½¨Ê¡¸£ÖÝÊÐÈí¼þ´óµÀ89ºÅ¸£ÖÝÈí¼þÔ°Ò»Çø23ºÅÂ¥	±¾·¢Ã÷¹«¿ªÒ»ÖÖÖ§¸¶×¨ÓÃÂ·ÓÉÆ÷¼ÓÃÜÖ§¸¶ÐÅÏ¢µÄ·½·¨£¬°üÀ¨²½Öè£ºS1.Ö§¸¶×¨ÓÃÂ·ÓÉÆ÷½«Ö§¸¶ÔËÓªÉÌ±¾µØÃÜÔ¿´æ´¢ÖÁ´æ´¢Æ÷£»S2.Ö§¸¶×¨ÓÃÂ·ÓÉÆ÷ÓëÇëÇóÖ§¸¶µÄÒÆ¶¯ÖÕ¶Ë½¨Á¢ÎÞÏßÍ¨Ñ¶Á¬½Ó£»S3.Ö§¸¶×¨ÓÃÂ·ÓÉÆ÷ÑéÖ¤ÒÆ¶¯ÖÕ¶Ë·¢ËÍµÄÓÃ»§ÃûºÍÃÜÂëµÄºÏ·¨ÐÔ£¬²¢µ±ÑéÖ¤ºÏ·¨ºóÔÊÐíÒÆ¶¯ÖÕ¶ËµÇÂ½£¬È»ºó½øÈë²½ÖèS4£¬ÆäÖÐ£¬ËùÊöÓÃ»§ÃûºÍÃÜÂëÔ¤ÏÈÔÚÖ§¸¶ÔËÓªÉÌ·þÎñÆ÷ÖÐ×¢²á³É¹¦²¢Ô¤´æ´¢ÔÚÖ§¸¶×¨ÓÃÂ·ÓÉÆ÷µÄ´æ´¢Æ÷ÖÐ£»S4.Ê¹ÓÃÖ§¸¶ÔËÓªÉÌ±¾µØÃÜÔ¿½«µÇÂ½³É¹¦µÄÒÆ¶…	Ö§¸¶
Ò»ÖÖÊäÃÜÂë·ÀµÁ°´¼ü	ÛªÇÉ	2013-12-13	2014-04-09	CN103714622A	Ö÷·ÖÀàºÅ£ºG07F7/02(2006.01)I	Ê§Ð§-·¢Ã÷×¨ÀûÉêÇë¹«²¼ºóµÄ³·»Ø	212300 ½­ËÕÊ¡Õò½­ÊÐµ¤ÑôÊÐ»ªÄÏÐÂ´åÁú·ïÉ½×¯ÄÏ²à	±¾·¢Ã÷Éæ¼°ÃÜÂëÊäÈë×°ÖÃ¼¼ÊõÁìÓò£¬ÓÈÆäÊÇÒ»ÖÖÊäÃÜÂë·ÀµÁ°´¼ü£¬ËùÊö·ÀµÁ°´¼üÍ¨¹ýÊý¾ÝÏßÓëÃÜÂëÊäÈë×°ÖÃÁ¬½Ó£¬ËùÊöÃÜÂëÊäÈë×°ÖÃÉÏ°²×°ÓÐµçÔ´£¬µçÔ´Óë¿ØÖÆÆ÷ºÍ·ÀµÁ°´¼üÁ¬½Ó£¬¿ØÖÆÆ÷Í¨¹ýÊý¾ÝÏßÓëÈô¸ÉÊý×Ö°´¼üÁ¬½Ó£¬ËùÊö¿ØÖÆÆ÷»¹Á¬½ÓÓÐÏÔÊ¾Æ÷£¬ËùÊöµçÔ´Óë·ÀµÁ°´¼üÖ®¼äÁ¬½ÓÓÐµç×è¡£±¾·¢Ã÷µÄÓÐÒæÐ§¹ûÊÇ£º±¾·¢Ã÷µÄÊäÃÜÂë·ÀµÁ°´¼üÍ¨¹ýÒ»¸ö¼òµ¥µÄ¿ª¹ØÀ´¿ØÖÆ°´¼üµÄÓÐÐ§ÓëÎÞÐ§£¬½á¹¹¼òµ¥¡¢³É±¾µÍÁ®¡¢Ð§¹ûºÃ£¬ÃÖ²¹ÁËÃÜÂëÊäÈëÊ±ÂãÂ¶²Ù×÷Ð¹Â¶ÃÜÂëµ…	°²È«
¾ßÉí·Ý±æÊ¶¹¦ÄÜµÄµç×Ó½»Ò×ÏµÍ³	Çñ½ðºÍ	2013-12-24	2015-06-24	CN104732398A	Ö÷·ÖÀàºÅ£ºG06Q20/42(2012.01)I	ÔÚÉó-ÊµÖÊÉó²éµÄÉúÐ§	ÖÐ¹úÌ¨ÍåÐÂ±±ÊÐ	Ò»ÖÖ¾ßÉí·Ý±æÊ¶¹¦ÄÜµÄµç×Ó½»Ò×ÏµÍ³£¬°üÀ¨Ò»Ç°¶Ëµç×Ó½ÓÊÕ×°ÖÃ¼°Ò»ºó¶ËËÅ·þÆ÷£¬ÆäÖÐ¸ÃÒ»Ç°¶Ëµç×Ó½ÓÊÕ×°ÖÃÉèÓÐÒ»ÖÐÑë´¦Àíµ¥Ôª¡¢Ò»Éí·Ý±æÊ¶Ä£¿é¼°Ò»ÐÅÏ¢¸æÖªÄ£¿é£¬¸ÃÉí·Ý±æÊ¶Ä£¿éÉèÓÐÒ»Ö¸ÎÆ±æÊ¶µ¥Ôª£¬ÓÃÒÔ½ÓÊÕÒ»Ê¹ÓÃÕßµÄÖ¸ÎÆºó²úÉúÒ»½»Ò×ÐÅÏ¢£¬Í¨¹ý¸ÃÖÐÑë´¦Àíµ¥ÔªÀ´Ìá¹©¸Ãµç×Ó½»Ò×ÏµÍ³½øÐÐÈ·ÈÏ£¬¸ÃÐÅÏ¢¸æÖªÄ£¿éñîºÏÓÃÒÔÌá¹©½»Ò×³É¹¦Óë·ñµÄÐÅÏ¢£¬¶ø¸Ãºó¶ËËÅ·þÆ÷½¨ÖÃÓÐ¸ÃÊ¹ÓÃÕßµÄÉí·Ý×ÊÁÏ¿âÓë¸ÃÊ¹ÓÃÕßµÄ½ðÇ®ÕÊ»§£¬½èÒÔÊ¹×ÔÇ°¶Ëµç×Ó½ÓÊÕ×…	°²È«
Ö§¸¶·½·¨¡¢¿Í»§¶Ë¡¢½ÓÊÕ¶Ë¼°ÏµÍ³	ÉîÛÚ¹âÆô´´ÐÂ¼¼ÊõÓÐÏÞ¹«Ë¾	2013-12-26	2014-05-28	CN103824190A	Ö÷·ÖÀàºÅ£ºG06Q20/42(2012.01)I	ÓÐÐ§-ÊÚÈ¨	518034 ¹ã¶«Ê¡ÉîÛÚÊÐ¸£ÌïÇøÏãÃ·Â·1061ºÅÖÐÍ¶¹ú¼ÊÉÌÎñÖÐÐÄA¶°18B	±¾·¢Ã÷Ìá¹©ÁËÒ»ÖÖÖ§¸¶·½·¨¡¢¿Í»§¶Ë¡¢½ÓÊÕ¶Ë¼°ÏµÍ³£¬¸Ã¿Í»§¶Ë°üÀ¨´æ´¢Æ÷£¬ÓÃÓÚ´æ´¢ÈÏÖ¤ÐÅÏ¢£¬·¢ËÍ×°ÖÃ£¬Óë´æ´¢Æ÷ÏàÁ¬£¬ÓÃÓÚÒÔ¹âÐÅºÅ»òÉù²¨ÐÅºÅµÄÐÎÊ½ÏòÖ§¸¶½ÓÊÕ¶Ë·¢ËÍÖ§¸¶ÇëÇó£¬ÆäÖÐ£¬Ö§¸¶ÇëÇóÖÐÐ¯´øÓÐÈÏÖ¤ÐÅÏ¢£¬½ÓÊÕ×°ÖÃ£¬Óë´æ´¢Æ÷ÏàÁ¬£¬ÓÃÓÚ½ÓÊÕÖ§¸¶½ÓÊÕ¶ËÏìÓ¦Ö§¸¶ÇëÇóµÄ·´À¡ÐÅÏ¢¡£±¾·¢Ã÷½â¾öÁËÏà¹Ø¼¼ÊõÖÐ´Å¿¨µÄÀ©Õ¹ÐÔ²»¸ß¡¢ÈÝÒ×±»¸ÉÈÅ¡¢±»¸´ÖÆµÄÎÊÌâ£¬¾ßÓÐ¿ÉÀ©Õ¹ÐÔÇ¿¡¢²»Ò×±»¸ÉÈÅ¡¢²»Ò×±»¸´ÖÆµÄÓÐÒæÐ§¹û¡£	Ö§¸¶
Ò»ÖÖ½ðÈÚ¼¯³ÉµçÂ·¿¨¸öÈË»¯Êý¾ÝµÄ¼ì²â·½·¨¼°ÏµÍ³	±±¾©´óÌÆÖÇÄÜ¿¨¼¼ÊõÓÐÏÞ¹«Ë¾	2013-12-27	2014-04-09	CN103714295A	Ö÷·ÖÀàºÅ£ºG06F21/60(2013.01)I	ÓÐÐ§-ÊÚÈ¨	100094 ±±¾©ÊÐº£µíÇøÓÀ¼Î±±Â·6ºÅ	±¾·¢Ã÷Ìá¹©ÁËÒ»ÖÖ½ðÈÚ¼¯³ÉµçÂ·IC¿¨¸öÈË»¯Êý¾ÝµÄ¼ì²â·½·¨¼°ÏµÍ³£¬°üÀ¨£º°´ÕÕµÚÒ»·¢¿¨»ú¹¹µÄ¸öÈË»¯Êý¾ÝÄ£°åºÍ±£»¤·½Ê½½âÎöµÚÒ»·¢¿¨»ú¹¹µÄÔ­Ê¼¸öÈË»¯Êý¾ÝÎÄ¼þ£¬µÃµ½¸öÈË»¯Êý¾ÝÃ÷ÎÄ£»½«ËùÊö¸öÈË»¯Êý¾ÝÃ÷ÎÄ×ª»»ÎªÔ¤¶¨¸ñÊ½µÄ¸öÈË»¯Êý¾Ý£¬²ÉÓÃ´ý¼ì²âµÄ½ðÈÚIC¿¨Î¨Ò»¶ÔÓ¦µÄÃÜÔ¿Êý¾Ý¼ÓÃÜ×ª»»ÎªÔ¤¶¨¸ñÊ½µÄ¸öÈË»¯Êý¾Ý£»½âÎö¼ÓÃÜºóµÄÔ¤¶¨¸ñÊ½µÄ¸öÈË»¯Êý¾Ý£¬¸ù¾Ý½âÎö³öµÄÄ£°åÊý¾Ý£¬ÑéÖ¤¸öÈË»¯ºóµÄ´ý¼ì²âµÄ½ðÈÚIC¿¨ÄÚ²¿Êý¾ÝµÄÕýÈ·ÐÔ¡£±¾·¢Ã÷Õë¶Ô²…	Êý¾Ý·ÖÎö
Ò»ÖÖ»ùÓÚIC¿¨¼¼ÊõµÄÖ÷»úµÇÂ½·½·¨¼°×°ÖÃ	ÖÐ¹ú¿ÆÑ§ÔºÐÅÏ¢¹¤³ÌÑÐ¾¿Ëù	2013-12-31	2015-07-01	CN104751043A	Ö÷·ÖÀàºÅ£ºG06F21/34(2013.01)I	ÔÚÉó-ÊµÖÊÉó²éµÄÉúÐ§	100093 ±±¾©ÊÐº£µíÇøãÉ×¯Â·¼×89ºÅ	±¾·¢Ã÷¹«¿ªÁËÒ»ÖÖ»ùÓÚIC¿¨¼¼ÊõµÄÖ÷»úµÇÂ½·½·¨¼°×°ÖÃ£¬ÆäÖÐ£¬¸Ã·½·¨°üÀ¨£ºÔÚ½ÓÊÕµ½¼¯³ÉµçÂ·IC¿¨µÄË¢¿¨ÐÅÏ¢ºó£¬½«IC¿¨µÄÐòÁÐºÅÓë×¢²á±íÖÐµÄÅäÖÃÐÅÏ¢½øÐÐÆ¥Åä£»ÔÚIC¿¨µÄÐòÁÐºÅÓëÅäÖÃÐÅÏ¢Æ¥ÅäµÄÇé¿öÏÂ£¬ÏÔÊ¾ÓÃ»§µÇÂ¼½çÃæ£¬ÒÔÌáÊ¾ÓÃ»§ÊäÈëÃÜÂë£»ÔÚÃÜÂëÕýÈ·µÄÇé¿öÏÂ£¬IC¿¨¶ÔÓ¦µÄÓÃ»§µÇÂ¼Ö÷»ú¡£±¾·¢Ã÷Í¨¹ýIC¿¨×÷ÎªÓÃ»§Éí·ÝÊ¶±ðµÄ»ù´¡£¬¶ÔÏÖÓÐUSB?keyµÄ·½Ê½½øÐÐÁË¸Ä½ø£¬Í¨¹ýIC¿¨µÄÐòÁÐºÅ½øÐÐÉí·ÝÊ¶±ð»ù´¡£¬½ø¶ø¸ù¾Ý²»Í¬IC¿¨ÓÃ»§Ö´ÐÐ²»Í¬µÄ…	°²È«
IC¿¨·ÀµÁË¢×°ÖÃºÍ·½·¨	ËÕÖÝº£²©ÖÇÄÜÏµÍ³ÓÐÏÞ¹«Ë¾	2014-01-02	2015-07-08	CN104766030A	Ö÷·ÖÀàºÅ£ºG06F21/77(2013.01)I	ÔÚÉó-ÊµÖÊÉó²éµÄÉúÐ§	215200 ½­ËÕÊ¡ËÕÖÝÊÐÎâ½­Çø¾­¼Ã¿ª·¢ÇøÁªÑîÂ·ÒÔÄÏ£¬³¤°²Â·ÒÔ¶«£¨¿Æ¼¼´´ÒµÔ°£©	±¾·¢Ã÷Éæ¼°Ò»ÖÖIC¿¨·ÀµÁË¢×°ÖÃºÍ·½·¨£¬IC¿¨·ÀµÁË¢×°ÖÃ°üÀ¨£ºIC¿¨Ð¾Æ¬¡¢ÉäÆµÍ¨ÐÅRFÄ£¿éºÍÂß¼­±£»¤µçÂ·£»Âß¼­±£»¤µçÂ··Ö±ðÓëËùÊöIC¿¨Ð¾Æ¬¡¢ÉäÆµÍ¨ÐÅRFÄ£¿éÏàÁ¬½Ó£»µ±IC¿¨Ð¾Æ¬ÐèÒª¹¤×÷Ê±£¬Âß¼­±£»¤µçÂ·¿ªÆôÉäÆµÍ¨ÐÅRFÄ£¿é£»µ±IC¿¨Ð¾Æ¬ÐèÒªÍ£Ö¹¹¤×÷Ê±£¬Âß¼­±£»¤µçÂ·¹Ø±ÕËùÊöÉäÆµÍ¨ÐÅRFÄ£¿é¡£±¾·¢Ã÷Ìá¹©µÄIC¿¨·ÀµÁË¢×°ÖÃºÍ·½·¨¿ÉÒÔÔÚIC¿¨ÐèÒª¹¤×÷µÄÊ±ºò´ò¿ªIC¿¨µÄRFÍ¨ÐÅ¹¦ÄÜ£¬²¢ÇÒ¿ÉÒÔÉèÖÃRFÍ¨ÐÅ¹¦ÄÜµÄ¿ªÆôÊ±³¤£¬ÔÚIC²»ÐèÒª¹¤×÷µÄÊ±ºò¹…	°²È«
Ò»ÖÖ¿ÉÐÅKey¼°Æä°²È«²Ù×÷·½·¨	¶«ÐÅºÍÆ½¿Æ¼¼¹É·ÝÓÐÏÞ¹«Ë¾	2014-01-03	2014-04-23	CN103745155A	Ö÷·ÖÀàºÅ£ºG06F21/57(2013.01)I	Ê§Ð§-·¢Ã÷×¨ÀûÉêÇë¹«²¼ºóµÄ²µ»Ø	519060 ¹ã¶«Ê¡Öéº£ÊÐÄÏÆÁ¿Æ¼¼¹¤ÒµÔ°ÆÁ¹¤ÖÐÂ·8ºÅ	±¾·¢Ã÷Ìá¹©ÁËÒ»ÖÖ¿ÉÐÅKey¼°Æä°²È«²Ù×÷·½·¨£¬ÆäÖÐ£¬¿ÉÐÅKey°üÀ¨Í¨ÐÅ´úÀíÄ£¿é¡¢°²È«´æ´¢Ä£¿é¡¢¿ÉÐÅ¼ÆËãÄ£¿éºÍ¿ÉÐÅ½»»¥Ä£¿é£¬Í¨ÐÅ´úÀíÄ£¿éÓÃÓÚÔÚ¿ÉÐÅKeyÓëÖÕ¶ËÉè±¸µÄ¿ÉÐÅ²Ù×÷ÏµÍ³Ö®¼ä½¨Á¢°²È«Í¨µÀ£¬°²È«´æ´¢Ä£¿éÓÃÓÚÎª¿ª·¢¿ÉÐÅÓ¦ÓÃÌá¹©°²È«´æ´¢API£¬²¢ÇÒÎª¿ÉÐÅKeyÌá¹©°²È«´æ´¢¹¦ÄÜ£¬¿ÉÐÅ¼ÆËãÄ£¿éÓÃÓÚÎª¿ÉÐÅÓ¦ÓÃÌá¹©¿ÉÐÅ¼ÆËãAPI£¬²¢ÇÒÎªÖÕ¶ËÉè±¸Ìá¹©¿ÉÐÅ¼ÆËã¹¦ÄÜ£¬¿ÉÐÅ½»»¥Ä£¿éÓÃÓÚ»ùÓÚÓÃ»§µÄ²Ù×÷Í¨¹ýËùÊöÍ¨ÐÅ´úÀíÄ£¿éÏòÖÕ¶ËÉè±¸µÄ¿ÉÐ…	°²È«
ÍøÂç½»Ò×µç×ÓºÏÍ¬µÄ¶àÊý×ÖÇ©Ãû·½·¨	°²Í¶ÈÚ£¨±±¾©£©ÍøÂç¿Æ¼¼ÓÐÏÞ¹«Ë¾	2014-01-08	2014-04-02	CN103699852A	Ö÷·ÖÀàºÅ£ºG06F21/64(2013.01)I	Ê§Ð§-·¢Ã÷×¨ÀûÉêÇë¹«²¼ºóµÄ²µ»Ø	100052 ±±¾©ÊÐÐûÎäÃÅÍâ´ó½Ö28ºÅB×ù0901	±¾·¢Ã÷Ìá¹©ÁËÒ»ÖÖÍøÂç½»Ò×µç×ÓºÏÍ¬µÄ¶àÊý×ÖÇ©Ãû·½·¨£¬°üÀ¨²½ÖèS1¡¢ÀûÓÃSDKÉú³É¾ßÓÐºÏÍ¬ÄÚÈÝµÄPDFµç×ÓºÏÍ¬ÎÄµµ£»S2¡¢ÀûÓÃËùÊöSDKÔÚËùÊöPDFµç×ÓºÏÍ¬ÎÄµµÖÐÉú³É¶à¸öÊý×ÖÇ©Ãû£»S3¡¢Éú³É°üº¬ËùÊö¶à¸öÊý×ÖÇ©ÃûµÄPDFµç×ÓºÏÍ¬¡£±¾·¢Ã÷Ìá¹©µÄÍøÂç½»Ò×µç×ÓºÏÍ¬µÄ¶àÊý×ÖÇ©Ãû·½·¨£¬Ê¹ÓÃÈí¼þ·½Ê½¶Ôµç×ÓºÏÍ¬ÊµÊ±µØ½øÐÐ¶àÊý×ÖÇ©Ãû£¬Âú×ãÁËÍøÂç½»Ò×µç×ÓºÏÍ¬¶ÔÓÚÊý×ÖÇ©Ãû°²È«±ãÀûµÄÐèÒª£¬·½±ã¿ì½Ý£¬È·±£ÁËÍøÂç½»Ò×µç×ÓºÏÍ¬µÄÇ©ÊðµÄÓÐÐ§ÐÔ¼°ºÏ·¨ÐÔ¡£…	°²È«
Ò»ÖÖÑéÖ¤¿ØÖÆ·½·¨¡¢ÖÕ¶Ë¡¢·þÎñÆ÷¡¢ÖÕ¶ËÉè±¸¼°ÏµÍ³	ÌÚÑ¶¿Æ¼¼£¨ÉîÛÚ£©ÓÐÏÞ¹«Ë¾	2014-01-15	2014-04-16	CN103729765A	Ö÷·ÖÀàºÅ£ºG06Q20/40(2012.01)I	ÓÐÐ§-ÊÚÈ¨	518000 ¹ã¶«Ê¡ÉîÛÚÊÐ¸£ÌïÇøÕñÐËÂ·Èü¸ñ¿Æ¼¼Ô°2¶°¶«403ÊÒ	Ò»ÖÖÑéÖ¤¿ØÖÆ·½·¨¡¢ÖÕ¶Ë¡¢·þÎñÆ÷¡¢ÖÕ¶ËÉè±¸¼°ÏµÍ³£¬ÆäÖÐ·½·¨µÄÊµÏÖ°üÀ¨£º½ÓÊÕ¶©µ¥´´½¨Ö¸Áî£¬²¢ÒÀ¾ÝËùÊö¶©µ¥´´½¨Ö¸Áî´´½¨¶©µ¥ÇëÇó£»Ïò·þÎñÆ÷·¢ËÍËùÊö¶©µ¥ÇëÇó£»½ÓÊÕÀ´×Ô·þÎñÆ÷µÄÓëËùÊö¶©µ¥ÇëÇóÖ¸¶¨µÄ¶©µ¥¶ÔÓ¦µÄÍ¼ÐÎÂë£»È·¶¨ËùÊöÍ¼ÐÎÂëÊÇ·ñÊ§Ð§£¬Èç¹ûÊ§Ð§£¬Ôò½ÓÊÕÀ´×ÔËùÊö·þÎñÆ÷µÄÓëËùÊö¶©µ¥¶ÔÓ¦ÇÒ¸üÐÂ¹ýµÄÍ¼ÐÎÂë£»ÏÔÊ¾½ÓÊÕµ½µÄÍ¼ÐÎÂë¡£±¾·½·¨ÖÐ£¬ÖÕ¶Ë½ÓÊÕµ½µÄÌõÍ¼ÐÎÂëÎª¶¯Ì¬µÄÍ¼ÌõÐÎÂë£»Ôò¿ÉÒÔ½µµÍÒò²ÉÓÃ¾²Ì¬Í¼ÌõÐÎÂë±»½ØÍ¼À©É¢µÄ·…	°²È«
»ùÓÚÒôÆµÊäÈëÊä³ö½Ó¿ÚµÄÊý¾Ý´«µÝ·½·¨Óë×°ÖÃ	ÇàµºÀöö©»¥ÁªÐÅÏ¢ÓÐÏÞ¹«Ë¾	2014-01-17	2014-06-04	CN103839018A	Ö÷·ÖÀàºÅ£ºG06F21/85(2013.01)I	Ê§Ð§-·¢Ã÷×¨ÀûÉêÇë¹«²¼ºóµÄÊÓÎª³·»Ø	266400 É½¶«Ê¡Çàµº½ºÄÏÊÐÇØ»ÊµºÂ·1-777ºÅ4¶°2µ¥Ôª401	±¾·¢Ã÷Éæ¼°Ò»ÖÖ»ùÓÚÒôÆµÊäÈëÊä³ö½Ó¿ÚµÄÊý¾Ý´«µÝ·½·¨Óë×°ÖÃ£¬ËùÊö·½·¨°üÀ¨£º´ÓÖÕ¶ËÒôÆµÊäÈëÊä³ö½Ó¿Ú¶ÁÈ¡ÖÕ¶ËÊý¾Ý²¢½øÐÐ±à½âÂë£»½ÓÊÕ¾­±à½âÂëºóµÄÊý¾Ý£¬¶ÔËùÊöÊý¾Ý½øÐÐ°²È«ÑéÖ¤£»Í¨¹ýËùÊöÖÕ¶ËÒôÆµÊäÈëÊä³ö½Ó¿Ú·¢ËÍÓÃÓÚ±íÕ÷°²È«ÑéÖ¤Í¨¹ýµÄÍ¨ÖªÐÅÏ¢ÖÁËùÊöÖÕ¶Ë£»Í¨¹ýÖÕ¶ËÒôÆµÊäÈëÊä³ö½Ó¿ÚÏòÖÕ¶Ë·¢ËÍÈÏÖ¤ÎÄ¼þ£»ÒÔ¼°½ÓÊÕÖÕ¶ËËù·´À¡µÄ½áÊøÐÅÏ¢¡£ËùÊöÊý¾Ý´«µÝ·½·¨Óë×°ÖÃ»ùÓÚÒôÆµÊäÈëÊä³ö½Ó¿ÚÑéÖ¤ÈÏÖ¤ÎÄ¼þ£¬°üÀ¨¶ÔÃÜÔ¿ÎÄ¼þµÄ´æ´¢Óëµ÷ÓÃ£¬²¢Í…	°²È«
Ò»ÖÖÊµÏÖÍøÉÏ¹ºÎïµÄ·½·¨ºÍÏµÍ³	±±¾©¾©¶«ÉÐ¿ÆÐÅÏ¢¼¼ÊõÓÐÏÞ¹«Ë¾	2014-01-21	2014-05-07	CN103778358A	Ö÷·ÖÀàºÅ£ºG06F21/31(2013.01)I	ÓÐÐ§-ÊÚÈ¨	100080 ±±¾©ÊÐº£µíÇøËÕÖÝ½Ö20ºÅ2ºÅÂ¥2²ã	±¾·¢Ã÷Ìá¹©Ò»ÖÖÊµÏÖÍøÉÏ¹ºÎïµÄ·½·¨ºÍÏµÍ³£¬Æä¾ßÓÐ±È½Ï¼òµ¥µÄÁ÷³Ì£¬ÓÐÖúÓÚÎüÒýÓÃ»§½øÐÐÍøÉÏ¹ºÎï¡£±¾·¢Ã÷µÄÊµÏÖÍøÉÏ¹ºÎïµÄ·½·¨°üÀ¨£ºÔÚÊä³ö¶©µ¥½áËãÒ³ºó£¬»ñÈ¡ÓÃ»§µÄÊÖ»úºÅÂëºÍÊÕ»õµØÖ·²¢±£´æ£»ÔÚ¶©µ¥±»Ìá½»ºó£¬ÅÐ¶ÏÔÚÊä³öËùÊö¶©µ¥½áËãÒ³Ö®Ç°ÊÇ·ñÔø¾­±£´æËùÊöÊÖ»úºÅÂë£¬ÈôÊÇ£¬Ôò¶ÔËùÊöÓÃ»§½øÐÐÉí·ÝÑéÖ¤²¢ÇÒÔÚÑéÖ¤Í¨¹ýµÄÇé¿öÏÂÊä³öÖ§¸¶Ò³£¬·ñÔò£¬Ö±½ÓÊä³öËùÊöÖ§¸¶Ò³¡£	Ö§¸¶
ÒÆ¶¯Ö¸ÎÆ¸¶·Ñ·½·¨¼°ÏµÍ³	ÄÏ¾©¹¤³ÌÑ§Ôº	2014-01-23	2014-04-30	CN103761512A	Ö÷·ÖÀàºÅ£ºG06K9/00(2006.01)I	Ê§Ð§-·¢Ã÷×¨ÀûÉêÇë¹«²¼ºóµÄ²µ»Ø	211167 ½­ËÕÊ¡ÄÏ¾©ÊÐ½­Äþ¿ÆÑ§Ô°ºë¾°´óµÀ1ºÅ	±¾·¢Ã÷Ìá¹©Ò»ÖÖÒÆ¶¯Ö¸ÎÆ¸¶·Ñ·½·¨£¬Í¨¹ý½«²É¼¯µÄÖ¸ÎÆÊý¾ÝÓëÒÑÂ¼ÈëµÄÖ¸ÎÆÊý¾Ý½øÐÐÆ¥Åä£¬À´±ã½ÝÇÒ°²È«¿É¿¿µØÍê³ÉÒÆ¶¯Ö§¸¶£»¸ÃÖÖÒÆ¶¯Ö¸ÎÆ¸¶·Ñ·½·¨¼°ÏµÍ³£¬Í¨¹ýÖ¸ÎÆÊ¶±ð¼¼ÊõÊµÏÖÒÆ¶¯Ö§¸¶£¬ÄÜ¹»ÓÐÐ§±£ÕÏÓÃ»§²Æ²úµÄ°²È«£¬ÇÒÊ¹ÓÃ±ã½Ý¡£¸ÃÖÖÒÆ¶¯Ö¸ÎÆ¸¶·Ñ·½·¨¼°ÏµÍ³£¬´ó´óÌá¸ßÁËÏµÍ³µÄ°²È«ÐÔ£¬Å×ÆúÁË´«Í³IC¿¨Ìå»ýÅÓ´ó¡¢Ôì¼Û°º¹ó¡¢Ò×ÆÆ½â¡¢Ò×¶ªÊ§¡¢Ð¯´ø²»·½±ãµÈÈ±µã¡£¸ÃÖÖÒÆ¶¯Ö¸ÎÆ¸¶·Ñ·½·¨¼°ÏµÍ³£¬ÄÜ¹»×öµ½Éí·ÝÐÅÏ¢µÄÊ±¿Ì±æ±ð±£´æÇÒ¿ÉÒÔ½øÐÐ¸…	°²È«
Ò»ÖÖÍøÒøÊ¹ÓÃµÄÈÏÖ¤·½·¨¡¢×°ÖÃ¡¢ÏµÍ³¼°ÍøÒø·þÎñÆ÷	ÓîÁú¼ÆËã»úÍ¨ÐÅ¿Æ¼¼£¨ÉîÛÚ£©ÓÐÏÞ¹«Ë¾	2014-01-23	2015-07-29	CN104811417A	Ö÷·ÖÀàºÅ£ºH04L29/06(2006.01)I	ÔÚÉó-ÊµÖÊÉó²éµÄÉúÐ§	518057 ¹ã¶«Ê¡ÉîÛÚÊÐÄÏÉ½Çø¸ßÐÂ¼¼Êõ¹¤ÒµÔ°±±Çø¿áÅÉÐÅÏ¢¸Û1¶°6²ã	±¾·¢Ã÷Ìá¹©Ò»ÖÖÍøÒøÊ¹ÓÃµÄÈÏÖ¤·½·¨¡¢×°ÖÃ¡¢ÏµÍ³¼°ÍøÒø·þÎñÆ÷£¬ËùÊö·½·¨°üÀ¨£º½ÓÊÕÍøÒø·þÎñÆ÷·¢ËÍµÄÓÃ»§ÐÅÏ¢£»¸ù¾ÝËùÊöÓÃ»§ÐÅÏ¢ÒÔ¼°Ô¤´æµÄÓÃ»§ÐÅÏ¢ÓëÎ»ÖÃÐÅÏ¢µÄ¶ÔÓ¦¹ØÏµÖÐ²éÕÒÆä¶ÔÓ¦µÄÎ»ÖÃÐÅÏ¢£»½«²éÕÒµ½µÄÎ»ÖÃÐÅÏ¢·¢ËÍ¸øÍøÒø·þÎñÆ÷£¬·¢ËÍ¸øÍøÒø·þÎñÆ÷µÄÎ»ÖÃÐÅÏ¢ÓÃÓÚÍøÒø·þÎñÆ÷¶ÔÓÃ»§µ±Ç°Î»ÖÃÐÅÏ¢½øÐÐÈÏÖ¤£»»òÕß£¬½ÓÊÕÍøÒø·þÎñÆ÷·¢ËÍµÄÓÃ»§µ±Ç°Î»ÖÃÐÅÏ¢£¬½«ËùÊöÓÃ»§µ±Ç°Î»ÖÃÐÅÏ¢Óë²éÕÒµ½µÄÎ»ÖÃÐÅÏ¢½øÐÐÈÏÖ¤£¬µÃµ½ÈÏÖ¤½á¹û£¬²¢½«ËùÊ…	°²È«
¿ÉÐÅÖÕ¶Ë¡¢Ë«ÐÅµÀ¿¨¡¢¿¹¿ËÂ¡Ð¾Æ¬¡¢Ð¾Æ¬Ö¸ÎÆºÍ¿¹ÐÅµÀ¹¥»÷µÄ·½·¨	×ÞºòÎÄ	2014-02-19	2014-05-07	CN103778374A	Ö÷·ÖÀàºÅ£ºG06F21/56(2013.01)I	ÓÐÐ§-ÊÚÈ¨	510006 ¹ã¶«Ê¡¹ãÖÝÊÐ´óÑ§³ÇÍâ»·Î÷Â·230ºÅ¹ãÖÝ´óÑ§ÊýÑ§Ñ§Ôº	±¾ÉêÇë¹«¿ªÁËÒ»ÖÖ¿ÉÐÅÖÕ¶Ë¡¢Ë«ÐÅµÀ¿¨¡¢¿¹¿ËÂ¡Ð¾Æ¬¡¢Ð¾Æ¬Ö¸ÎÆºÍ¿¹ÐÅµÀ¹¥»÷µÄ·½·¨£¬¿ÉÐÅÖÕ¶Ë°üÀ¨Ö÷¿ØÐ¾Æ¬¡¢Ë«ÐÅµÀ¿¨²å²Û¡¢ÐÅµÀ¸ôÀë²¿¼þºÍÍ¨Ñ¶½Ó¿Ú£»ËùÊöË«ÐÅµÀ¿¨²å²Û°üÀ¨µÚÒ»ÐÅµÀÁ¬½ÓÍ·ºÍµÚ¶þÐÅµÀÁ¬½ÓÍ·£¬µÚÒ»ÐÅµÀÁ¬½ÓÍ·ÓëÖ÷¿ØÐ¾Æ¬Á¬½Ó£¬µÚ¶þÐÅµÀÁ¬½ÓÍ·ÓëÐÅµÀ¸ôÀë²¿¼þÁ¬½Ó£¬Ë«ÐÅµÀ¿¨²å²ÛÓÃÓÚ²åÈëË«ÐÅµÀ¿¨£»±¾·¢Ã÷¿ÉÐÅÖÕ¶Ë¼°Ë«ÐÅµÀ¿¨ÄÜÈ¡´úÏÖÓÐµÄIC¿¨Ç¨ÒÆ£¬¾ßÓÐ°²È«ÐÔ¸ß¡¢¿ÉÓÃÐÔÇ¿¡¢³É±¾µÍ¡¢Ò×ÓÚÊµÊ©µÈÓÅµã¡£°²È«ÐÔ¸ßµÄ¹Ø¼üÔÚÓÚ£ºÏÖÓ…	°²È«
Ò»ÖÖÒÆ¶¯Ö§¸¶ÏµÍ³¼°ÖÇÄÜÊÖ»·	ÖÓÒ»Ãù	2014-02-19	2014-12-03	CN104182871A	Ö÷·ÖÀàºÅ£ºG06Q20/32(2012.01)I	Ê§Ð§-·¢Ã÷×¨ÀûÉêÇë¹«²¼ºóµÄÊÓÎª³·»Ø	610045 ËÄ´¨Ê¡³É¶¼ÊÐÎäºîÇø½ú¼ªÄÏÂ·½»´óÍ¥Ôº6-2-3D	±¾·¢Ã÷¹«¿ªÁËÒ»ÖÖÒÆ¶¯Ö§¸¶ÏµÍ³¼°ÖÇÄÜÊÖ»·¡£¸ÃÒÆ¶¯Ö§¸¶ÏµÍ³°üÀ¨Éí·ÝÑéÖ¤Ä£¿éºÍÓëÍøÂçÁ¬½ÓµÄÒÆ¶¯ÖÕ¶Ë£¬ËùÊöÉí·ÝÑéÖ¤Ä£¿éÓÃÓÚÑéÖ¤Ö§¸¶ÕßµÄÉí·Ý²¢Éú³ÉÓÃÓÚËùÊöÒÆ¶¯ÖÕ¶ËÍê³ÉÖ§¸¶µÄÐÅÏ¢¡£Ïà½ÏÓÚÏÖÓÐµÄÒÆ¶¯Ö§¸¶ÏµÍ³£¬±¾·¢Ã÷µÄÒÆ¶¯Ö§¸¶ÏµÍ³ÔöÉèÓÐÉí·ÝÑéÖ¤Ä£¿é£¬Í¨¹ýÉí·ÝÑéÖ¤Ä£¿é¶ÔÖ§¸¶ÕßµÄÉí·Ý½øÐÐÑéÖ¤£¬±£Ö¤ÔöÇ¿ÒÆ¶¯Ö§¸¶ÏµÍ³µÄ°²È«ÐÔ£¬±£ÕÏÓÃ»§µÄÀûÒæ¡£±¾·¢Ã÷µÄÖÇÄÜÊÖ»·¼æ¾ß×°ÊÎºÍÉí·ÝÑéÖ¤¹¦ÄÜ¡£	Ö§¸¶
Ò»ÖÖ¿É×ÔÖ÷²éÑ¯Óà¶îºÍ³äÖµµÄ·Ç½Ó´¥¿¨¼°ÆäÊ¹ÓÃ·½·¨	ÁõºêÎ°	2014-02-25	2014-05-21	CN103810517A	Ö÷·ÖÀàºÅ£ºG06K19/07(2006.01)I	ÓÐÐ§-×¨ÀûÉêÇëÈ¨¡¢×¨ÀûÈ¨µÄ×ªÒÆ	100856 ±±¾©ÊÐº£µíÇø¸´ÐËÂ·83ºÅ¼×22Â¥24ºÅ	±¾·¢Ã÷Éæ¼°Ò»ÖÖ¿É×ÔÖ÷²éÑ¯Óà¶îºÍ³äÖµµÄ·Ç½Ó´¥¿¨¼°ÆäÊ¹ÓÃ·½·¨£¬°üÀ¨ÓÃÓÚÌá¹©»ùÓÚUSBÐ­ÒéµÄÍ¨ÐÅµÄUSB½Ó¿ÚÄ£¿é£»ÓÃÓÚ¶Ô½ÓÊÕµÄÀ´×ÔUSB½Ó¿ÚÄ£¿é»òÄÚ²¿´¦ÀíÄ£¿éµÄÏûÏ¢½øÐÐÐ­Òé×ª»»£¬ÊµÏÖUSB½Ó¿ÚÄ£¿éÓëÄÚ²¿´¦ÀíÄ£¿éµÄÏûÏ¢»¥Í¨µÄ½Ó¿Ú×ª»»Ä£¿é£»ÓÃÓÚ´¦Àí½Ó¿Ú×ª»»Ä£¿éºÍ·Ç½Ó´¥½Ó¿ÚÄ£¿é·¢ËÍµÄÏûÏ¢£¬ÊµÏÖÊý×ÖÖ¤Êé¹¦ÄÜ¡¢Óà¶î²éÑ¯¼°³äÖµ¹¦ÄÜµÄÄÚ²¿´¦ÀíÄ£¿é£»ÓÃÓÚÌá¹©·Ç½Ó´¥Í¨ÐÅ£¬²¢ÓëÄÚ²¿´¦ÀíÄ£¿é½øÐÐ½»»¥£¬ÊµÏÖµç×ÓÏÖ½ðË¢¿¨¹¦ÄÜµÄ·Ç½Ó´¥½Ó¿ÚÄ£¿…	Ö§¸¶
Ò»ÖÖÕýÃæÈËÁ³Í¼ÏñÉúÎïÃÜÔ¿Éú³É·½·¨	º¼ÖÝµç×Ó¿Æ¼¼´óÑ§	2014-03-03	2014-06-25	CN103886235A	Ö÷·ÖÀàºÅ£ºG06F21/32(2013.01)I	ÓÐÐ§-ÊÚÈ¨	310018 Õã½­Ê¡º¼ÖÝÊÐÏÂÉ³¸ß½ÌÔ°Çø2ºÅ´ó½Ö	±¾·¢Ã÷Ìá³öÁËÒ»ÖÖÈËÁ³ÉúÎïÃÜÔ¿Éú³É·½·¨¡£±¾·¢Ã÷½«ÓÃ»§ÕýÃæÈËÁ³Í¼Ïñ¾­ÌØÕ÷¿Õ¼ä±ä»»ºó£¬Ïò¸ßÎ¬¿Õ¼äÖÐÍ¶Ó°£¬ÔÚ¸ßÎ¬¿Õ¼äÖÐ½«ÈËÁ³ÌØÕ÷ÐÅÏ¢ÎÈ¶¨µ½¿É½ÓÊÜµÄ²¨¶¯·¶Î§ÄÚ£¬ÔÙ¶ÔÎÈ¶¨ºóµÄÌØÕ÷ÏòÁ¿ÌáÈ¡Êý×ÖÐòÁÐ£¬´ÓÊý×ÖÐòÁÐÖÐ±àÂëÉú³ÉÉúÎïÃÜÔ¿¡£Õû¸ö·½·¨ÔÚÒÆ¶¯ÖÕ¶Ë¡¢ÈÏÖ¤·þÎñÆ÷¶Ë¾ùÎÞÐè´æ´¢ÓÃ»§ÈËÁ³ÐÅÏ¢£¬Ò²ÎÞÐèÔÚÍøÂçÖÐ´«µÝÓÃ»§µÄÈËÁ³Í¼Ïñ¡£ÓÃ»§Í¨¹ý²É¼¯×ÔÉíµÄÕýÃæÈËÁ³Í¼ÏñÔÚ±¾µØÉú³É£¨ÓÃ»§Ãû¡¢ÃÜÔ¿£©¶Ô£¬Í¨¹ý£¨ÓÃ»§Ãû¡¢ÃÜÔ¿£©¶ÔÑÜÉúµÄ¸÷ÖÖÈÏÖ…	°²È«
Ò»ÖÖÓÃ»§Éí·ÝÊ¶±ð¿¨	ÌìµØÈÚ¿Æ¼¼¹É·ÝÓÐÏÞ¹«Ë¾	2014-03-12	2014-06-25	CN103888259A	Ö÷·ÖÀàºÅ£ºH04L9/32(2006.01)I	ÓÐÐ§-ÊÚÈ¨	100083 ±±¾©ÊÐº£µíÇøÑ§ÇåÂ·38ºÅB×ù1810	±¾·¢Ã÷Ìá¹©ÁËÒ»ÖÖÓÃ»§Éí·ÝÊ¶±ð¿¨£¬°üÀ¨£ºÍ¨Ñ¶Ä£¿é£¬ÓÃÓÚ½øÐÐÐÅÏ¢½ÓÊÕºÍÊä³ö£»°²È«ÈÏÖ¤Ä£¿é£¬ÓÃÓÚ½øÐÐ°²È«ÈÏÖ¤£»È¨ÏÞ¿ØÖÆÄ£¿é£¬ÓÃÓÚ½øÐÐÈ¨ÏÞ¿ØÖÆ£»°²È«·À»¤Ä£¿é£¬ÓÃÓÚ½øÐÐ¼ÓÈÅ²Ù×÷£»°²È«´æ´¢Ä£¿é£¬ÓÃÓÚÖÁÉÙ´æ´¢½øÐÐÈÏÖ¤µÄ¹«Ô¿¡¢½øÐÐÇ©Ãû¼ÆËãµÄË½Ô¿¡¢ÓÃÓÚ½øÐÐÈÏÖ¤µÄÖ¤Êé£¬ÓÃÓÚ¼Ó½âÃÜµÄ¶Ô³ÆÃÜÔ¿ÒÔ¼°ÓÃÓÚÐ£Ñé¼ÆËãµÄ¶Ô³ÆÃÜÔ¿£»¹«Ô¿Ëã·¨Ä£¿é£¬ÓÃÓÚ½øÐÐÇ©Ãû¼ÆËã£¬ÈÏÖ¤¼ÆËãºÍ/»òÑéÇ©¼ÆËã£»¶Ô³ÆËã·¨Ä£¿é£¬ÓÃÓÚ½øÐÐ¼Ó½âÃÜ¼ÆËãºÍ/»òÐ£Ñé¼ÆËã£…	°²È«
ÖÇÄÜ»¯µç×ÓÉÌÎñÓÃ»§¹ÜÀíÏµÍ³¼¼Êõ¼°ÔËÐÐ·½·¨	Ñî¼ÃÖÒ	2014-03-17	2015-09-23	CN104935550A	Ö÷·ÖÀàºÅ£ºH04L29/06(2006.01)I	ÔÚÉó-ÎÄ¼þµÄ¹«¸æËÍ´ï	315199 Õã½­Ê¡Äþ²¨ÊÐÄÏ²¿ÉÌÎñÇøÌ©¿µÖÐÂ·468ºÅ°ÂÀöÈüºÀÈç´óÏÃ21²ã2106	±¾·¢Ã÷µÄÄ¿µÄÊÇ½â¾ö´«Í³µç×ÓÉÌÎñÁìÓòµÄÓÃ»§¹ÜÀí¡¢½»Ò×Æ¾Ö¤ºÍÖ§¸¶ÑéÖ¤»·½Ú£¬Éæ¼°ÍøÂçÓÃ»§Ê¹ÓÃÃ÷ÂëÐÅÏ¢(Ó¢ÎÄ¼Ó°¢À­²®Êý×Ö)»ò´ÅÌõ¡¢IC¿¨¼ÓÃÜÂë·½Ê½Ëù´æÔÚµÄµÍ¼¶±ðÐÅÏ¢´¦Àí¼¼ÊõÈ±ÏÝºÍÏµÍ³°²È«±£ÕÏ²»×ãÎÊÌâ£¬Ìá¹©ÁËÒ»ÖÖÈÚºÏ¼ÆËã»ú¡¢ÍøÂçºÍÉúÎï¼¼ÊõÎªÒ»ÌåµÄÖÇÄÜ»¯µç×ÓÉÌÎñÓÃ»§¹ÜÀíÏµÍ³¼¼Êõ¼°ÔËÐÐ·½·¨¡£ÖØ¹¹ÁËµç×ÓÉÌÎñÏµÍ³Æ½Ì¨µÄÓÃ»§ÐÅÏ¢¹ÜÀíÌåÏµ£¬°ÑÀ´×ÔÓÚÓÃ»§±¾ÉíµÄÉúÎïÐÅÏ¢Ö±½ÓÓ¦ÓÃÓÚÍøÂçÓÃ»§µÄÉí·ÝÊ¶±ðºÍÖ§¸¶ÑéÖ¤²Ù×÷£¬½¨Á¢ÈËÌåÓëÍøÂ…	°²È«
Ò»ÖÖATM»úÑéÖ¤³Ö¿¨ÈËÉí·ÝµÄ·½·¨	ÉîÛÚâù»¯µçÄÔ¹É·ÝÓÐÏÞ¹«Ë¾	2014-03-18	2014-08-27	CN104008312A	Ö÷·ÖÀàºÅ£ºG06F21/00(2013.01)I	Ê§Ð§-·¢Ã÷×¨ÀûÉêÇë¹«²¼ºóµÄ²µ»Ø	518000 ¹ã¶«Ê¡ÉîÛÚÊÐ¸£ÌïÇø½ðÌïÂ·4018ºÅ°²Áª´óÏÃ27Â¥A02	±¾·¢Ã÷¹«¿ªÁËÒ»ÖÖATM»úÑéÖ¤³Ö¿¨ÈËÉí·ÝµÄ·½·¨£¬³Ö¿¨ÈË½«ÒøÐÐ¿¨²åÈëATM»úÆ÷Ö®ºó£¬ÈçÒøÐÐ¿¨ÒÑ°ó¶¨ÁË¶¯Ì¬µç×ÓÃÜÂë£¬ÔòÓÃ»§µÇÂ¼»ò½øÐÐ½»Ò×Ê±£¬³ýÁËÐèÒªÊäÈëÃÜÂëÍâ£¬»¹ÐèÒªÊäÈë¶¯Ì¬µç×ÓÃÜÂëÆ÷ÉÏÏÔÊ¾µÄËæ»úµÄ¶¯Ì¬µç×ÓÃÜÂë£¬Ö»ÓÐµ±ÃÜÂë¼°¶¯Ì¬µç×ÓÃÜÂë¶¼Í¨¹ýÒøÐÐÏµÍ³ÈÏÖ¤³É¹¦ºó£¬²ÅÄÜ¹»Õý³£µÇÂ¼»ò½øÐÐ½»Ò×¡£±¾·¢Ã÷¿ÉÒÔ·ÀÖ¹¿¨Ö÷µÄÒøÐÐ¿¨ºÍÃÜÂë±»µÁºó£¬·Ç·¨³Ö¿¨ÈËÆ¾ÒøÐÐ¿¨ºÍÃÜÂëÔÚATMÉÏ½øÐÐ½»Ò×£¬ÓÐÐ§µØ±ÜÃâ¿¨Ö÷µÄ²Æ²úËðÊ§¡£	°²È«
Ò»ÖÖ»ùÓÚÖ¸¾²ÂöµÄÉí·ÝÊ¶±ð×°ÖÃ¼°·½·¨	±±¾©Ë¼¶øµÃ¿Æ¼¼ÓÐÏÞ¹«Ë¾	2014-03-18	2015-09-23	CN104933389A	Ö÷·ÖÀàºÅ£ºG06K9/00(2006.01)I	ÔÚÉó-×¨ÀûÉêÇëÈ¨µÄ×ªÒÆ	100085 ±±¾©ÊÐº£µíÇøÉÏµØÐÅÏ¢Â·1ºÅ¹ú¼Ê´´ÒµÔ°1ºÅÂ¥1102ÊÒ	Ò»ÖÖ»ùÓÚÖ¸¾²ÂöµÄÉí·ÝÊ¶±ð×°ÖÃ¼°·½·¨£¬°üÀ¨£¬Ö÷ÉãÏñ»ú¡¢´ÓÉãÏñ»ú¡¢Í¼Ïñ´¦Àíµ¥Ôª¡¢Éí·ÝÈÏÖ¤µ¥Ôª¡¢´æ´¢µ¥Ôª¡¢´¥Ãþ¼ü¡¢ÂË¹â¾µ£¬ÒÔ¼°ºìÍâÃæ¹âÔ´£¬ÆäÖÐ£¬Ö÷¡¢´ÓÉãÏñ»ú£¬·Ö±ð½«»ñÈ¡µÄÖ÷¡¢´ÓÊÖÖ¸¾²ÂöÍ¼Ïñ·¢ËÍ¸øÍ¼Ïñ´¦Àíµ¥Ôª£»Í¼Ïñ´¦Àíµ¥Ôª£¬´ÓÖ÷¡¢´ÓÊÖÖ¸¾²ÂöÍ¼ÏñÐÅºÅÖÐÌáÈ¡Ö¸¾²ÂöÈýÎ¬ÌØÕ÷ÐÅÏ¢²¢½øÐÐ¹æ·¶»¯´¦Àí£¬»ñµÃÖ¸¾²ÂöµÄ»ù×¼ÌØÕ÷ÐÅÏ¢£»Éí·ÝÈÏÖ¤µ¥Ôª£¬½«»ñÈ¡µÄ´ýÊ¶±ðÖ¸¾²ÂöµÄ»ù×¼ÌØÕ÷ÐÅÏ¢ÓëÌØÕ÷Ä£°åÐÅÏ¢½øÐÐ±È½Ï£¬Íê³É¶ÔÖ¸¾²ÂöµÄÉí·ÝÊ…	°²È«
ÈËÁ³Ö§¸¶ÈÏÖ¤ÏµÍ³¼°·½·¨	ÉÏº£¿´¿´ÖÇÄÜ¿Æ¼¼ÓÐÏÞ¹«Ë¾	2014-03-19	2014-05-28	CN103824068A	Ö÷·ÖÀàºÅ£ºG06K9/00(2006.01)I	ÓÐÐ§-ÊÚÈ¨	201203 ÉÏº£ÊÐÆÖ¶«ÐÂÇøÕÅ½­¸ß¿Æ¼¼Ô°ËÉÌÎÂ·489ºÅ312ÊÒ	±¾·¢Ã÷½ÒÊ¾ÁËÒ»ÖÖÈËÁ³Ö§¸¶ÈÏÖ¤ÏµÍ³¼°·½·¨£¬ËùÊöÈÏÖ¤ÏµÍ³°üÀ¨ÈËÁ³Ô­Ê¼Êý¾Ý°ó¶¨¡¢Ãæ²¿ÖÊÁ¿ÆÀ¹À¡¢Ãæ²¿×ËÌ¬¾ÀÕý¡¢ÈËÁ³Ê¶±ð¡¢Ö§¸¶Êý¾ÝÖÇÄÜ´¦ÀíÎå´óÄ£¿é£»ÈËÁ³Ô­Ê¼Êý¾Ý°ó¶¨ÓÃÒÔ±ê×¼µÄÓÃ»§ÈËÁ³ÐÅÏ¢£¬×÷ÎªÔ­Ê¼°ó¶¨Êý¾Ý£»Ãæ²¿ÖÊÁ¿ÆÀ¹À¶Ô²É¼¯Êý¾ÝÃæ²¿×ÛºÏÖÊÁ¿ÆÀ¹À,É¸Ñ¡±È¶ÔÊý¾Ý£»Ãæ²¿×ËÌ¬¾ÀÕýÊÇÒÔ²»ËðÊ§Ãæ²¿Êý¾ÝÎªÇ°Ìá£¬¾ÀÕýÆ«Àë×ËÌ¬£»ÈËÁ³Ê¶±ðÒÔ²É¼¯ÐèÒª±È¶ÔµÄÈËÁ³ÐÅÏ¢£¬ÌáÈ¡Ãæ²¿ÌØÕ÷ÐÅÏ¢£¬²¢Óë±È¶ÔÊý¾Ý¿âÖÐµÄ¶ÔÓ¦Ãæ²¿ÌØÕ÷ÐÅÏ¢½øÐÐ±È¶Ô£¬ÅÐ…	°²È«
Ò»ÖÖ°²È«ÊäÈëÃÜÂëÐÅÏ¢µÄ´¥ÃþÏÔÊ¾×°ÖÃ¼°ÃÜÂëÊäÈë·½·¨	ÄÏ¾©ÓÀÌ©µç×ÓÓÐÏÞ¹«Ë¾	2014-03-20	2014-05-28	CN103824033A	Ö÷·ÖÀàºÅ£ºG06F21/83(2013.01)I	Ê§Ð§-·¢Ã÷×¨ÀûÉêÇë¹«²¼ºóµÄÊÓÎª³·»Ø	211200 ½­ËÕÊ¡ÄÏ¾©ÊÐäàË®¾­¼Ã¿ª·¢ÇøèÏÄþ¶«Â·368ºÅ	±¾·¢Ã÷Éæ¼°Ò»ÖÖ°²È«ÊäÈëÃÜÂëÐÅÏ¢µÄ´¥ÃþÏÔÊ¾×°ÖÃ¼°ÃÜÂëÊäÈë·½·¨£¬°üÀ¨´¥ÃþÆÁ¡¢´¥ÃþÆÁÇý¶¯Ä£¿é¡¢ÏÔÊ¾Ä£×é¡¢ÔÚÆÁÄ»ÏÔÊ¾Ä£¿é¡¢Î¢´¦ÀíÆ÷£¬Î¢´¦ÀíÆ÷Í¨¹ýÔÚÆÁÄ»ÏÔÊ¾Ä£¿éÓëÏÔÊ¾Ä£×éÁ¬½Ó£¬´¥ÃþÆÁÍ¨¹ý´¥ÃþÆÁÇý¶¯Ä£¿é½«ÓÃ»§´¥Ãþ²Ù×÷µÄ×ø±êÎ»ÖÃÐÅÏ¢ËÍÈëÎ¢´¦ÀíÆ÷¡£ÔÚÓÃ»§ÊäÈëÃÜÂëÊ±£¬Î¢´¦ÀíÆ÷Éú³ÉÃÜÂëÊäÈë½çÃæÍ¼Ïñ£¬Í¨¹ýÔÚÆÁÄ»ÏÔÊ¾Ä£¿é½«Éú³ÉÍ¼Ïñµþ¼Óµ½ÏµÍ³Êä³öµÄÊÓÆµÍ¼ÏñÖ®ÉÏºóÊä³ö¸øÏÔÊ¾Ä£×éÏÔÊ¾£¬ÓÃ»§µÄÊäÈëÐÅÏ¢±»Î¢´¦ÀíÆ÷½Ø»ñ£¬ÊäÈëµÄÃÜÂë¾…	°²È«
Ò»ÖÖÒøÐÐÊý¾Ý¿âµÄ²¡¶¾¸ôÀëÆ÷	´ÔÊ÷Òµ	2014-03-26	2015-09-30	CN104951696A	Ö÷·ÖÀàºÅ£ºG06F21/55(2013.01)I	Ê§Ð§-·¢Ã÷×¨ÀûÉêÇë¹«²¼ºóµÄÊÓÎª³·»Ø	130061 ¼ªÁÖÊ¡³¤´ºÊÐ¶«ÃñÖ÷´ó½Ö172ºÅ718ÊÒ	Ò»ÖÖÒøÐÐÊý¾Ý¿âµÄ²¡¶¾¸ôÀëÆ÷£¬ÊôÓÚ½ðÈÚÐÅÏ¢°²È«ÁìÓò£¬Æä²½ÖèÊÇ¶Ô×¼±¸½øÈëÒøÐÐÊý¾Ý¿âµÄÐÅÏ¢½øÐÐ¹âÑ§ÏÔÊ¾ÐÔ½Úµã¿ØÖÆÏÂµÄÏÞÖÆÐÔµ¥Ïò½ÓÊÕ£»¶ÔÏÞÖÆÐÔµ¥Ïò½ÓÊÕÖ®ºóµÄÐÅÏ¢½ÓÒøÐÐµÄÐèÇó½øÐÐÏÞ¶¨¹¦ÄÜÐÔµÄ¶¨Ïò½âÂë£»¶Ô²É¼¯À´µÄÐÅÏ¢£¬²»ÊÇÕý³£µÄ½»Ò×ÐÅÏ¢Òª½øÐÐÉ¾³ý£¬¶ÔÕý³£µÄ½»Ò×ÐÅÏ¢½ÓÒøÐÐµÄÒªÇó½øÐÐÏàÓ¦½ðÈÚ½»Ò×Á÷³ÌµÄ´¦Àíºó£¬°Ñ´¦ÀíºóµÄ½á¹û·´À¡·¢¸øÓÃ»§¶Ë¡£	°²È«
Ò»ÖÖÍøÉÏ½ðÈÚÐÅÏ¢µÄ°²È«´¦ÀíÆ÷	´ÔÊ÷Òµ	2014-03-26	2015-09-30	CN104951713A	Ö÷·ÖÀàºÅ£ºG06F21/71(2013.01)I	ÔÚÉó-ÊµÖÊÉó²éµÄÉúÐ§	130061 ¼ªÁÖÊ¡³¤´ºÊÐ¶«ÃñÖ÷´ó½Ö172ºÅ718ÊÒ	Ò»ÖÖÍøÉÏ½ðÈÚÐÅÏ¢µÄ°²È«´¦ÀíÆ÷£¬ÊôÓÚÐÅÏ¢°²È«¼¼ÊõÁìÓò£¬Æä²½ÖèÊÇ½ðÈÚÐÅÏ¢°²È«´¦ÀíÆ÷µÄ·¢ËÍÇøÔÚÔ­Ê¼½ðÈÚÐÅÏ¢Éú³Éºó¾­¹ýÏÈ¼ÓÃÜºó´ò°üÁ½ÖÖ¹¦ÄÜÄ£¿éµÄ¶ÀÁ¢¼Ó¹¤ºó£¬ÐÎ³É´ý·¢ËÍÐÅÏ¢ÐòÁÐ£»½«´ý·¢ËÍÐòÁÐ·¢ËÍ¸øÒøÐÐÊý¾Ý¿â£»ÒøÐÐÊý¾Ý¿â½ÓÊÕµ½ÐÅÏ¢ºó½øÐÐÏÈÈ¥´ò°üºó½âÃÜµÄ¼¼Êõ¼Ó¹¤ºÍÏàÓ¦½ðÈÚ·½ÃæµÄ´¦ÀíÖ®ºó£¬ÔÙ½«½á¹û¼ÓÃÜºÍ´ò°üºó·´À¡·¢¸ø¸Ã°²È«´¦ÀíÆ÷£»¸Ã°²È«´¦ÀíÆ÷µÄ½ÓÊÕÇøÔÚÊÕµ½À´×ÔÒøÐÐÊý¾Ý¿âµÄÐÅÏ¢ºó£¬½øÐÐÏàÓ¦µÄÈ¥´ò°üºÍ½âÃÜ¡¢°´ÕÕÒøÐÐÊ…	°²È«
Ò»ÖÖ²ÉÓÃ¹úÃÜSM1¼ÓÃÜÐ¾Æ¬µÄ´¥Ãþ¼üÅÌ¼°Æä¼ÓÃÜ·½·¨	¹ã¶«»ª´ó¼¯³É¼¼ÊõÓÐÏÞÔðÈÎ¹«Ë¾	2014-03-28	2014-06-11	CN103853340A	Ö÷·ÖÀàºÅ£ºG06F3/02(2006.01)I	Ê§Ð§-·¢Ã÷×¨ÀûÉêÇë¹«²¼ºóµÄ²µ»Ø	518000 ¹ã¶«Ê¡ÉîÛÚÊÐÁú¸ÚÇøÁú³Ç½ÖµÀÁú¸ÚÌì°²ÊýÂë´´ÒµÔ°4¶°A×ù16²ã	±¾·¢Ã÷¹«¿ªÁËÒ»ÖÖ²ÉÓÃ¹úÃÜSM1¼ÓÃÜÐ¾Æ¬µÄ´¥Ãþ¼üÅÌ¼°Æä¼ÓÃÜ·½·¨¡£Ò»ÖÖ²ÉÓÃ¹úÃÜSM1¼ÓÃÜÐ¾Æ¬µÄ´¥Ãþ¼üÅÌ£¬°üÀ¨´¥ÃþÐ¾Æ¬¡¢Ö÷¿ØMCU¼°ÓÃÓÚÁ¬½ÓÖ÷¿ØMCUÓë´¥ÃþÐ¾Æ¬µÄÊý¾Ýµ¼Ïß£¬ËùÊöµÄÊý¾Ýµ¼ÏßÎªÁ½ÏßÊ½´®ÐÐ×ÜÏßµÄI2C×ÜÏß£¬ËùÊöµÄI2C×ÜÏß»¹Á¬½ÓÓÐ¹úÃÜSM1¼ÓÃÜÐ¾Æ¬¡£±¾·¢Ã÷²ÉÓÃÓ²ºËÐÎÊ½µÄ¹úÃÜSM1¼ÓÃÜÐ¾Æ¬£¬¶Ô´¥ÃþÐ¾Æ¬²É¼¯µ½µÄ²É¼¯Êý¾Ý°ü½øÐÐ¼ÓÃÜ£¬´«ÊäÖÁÖ÷¿ØMCUÖ®ºóÔÙ½øÐÐ½âÃÜ£¬±£Ö¤ÁË´¥Ãþ´«¸ÐÐÅÏ¢ÔÚ´«Êä¹ý³ÌÖÐ²»»á±»ÇÔÈ¡£¬±£ÕÏÊý¾ÝÓ¦ÓÃµÄ°²È«£¬…	°²È«
ÒÆ¶¯Éè±¸¡¢Ê¹ÓÃÒÆ¶¯Éè±¸½øÐÐÉí·ÝÈÏÖ¤µÄ·½·¨	À¥ÌÚÎ¢µç×Ó¹É·ÝÓÐÏÞ¹«Ë¾	2014-04-01	2014-07-02	CN103902873A	Ö÷·ÖÀàºÅ£ºG06F21/33(2013.01)I	Ê§Ð§-·¢Ã÷×¨ÀûÉêÇë¹«²¼ºóµÄÊÓÎª³·»Ø	100195 ±±¾©ÊÐº£µíÇøÓñÈªÉ½Â·23ºÅ4ºÅÂ¥	±¾·¢Ã÷Éæ¼°Ò»ÖÖÒÆ¶¯Éè±¸¡¢Ê¹ÓÃÒÆ¶¯Éè±¸½øÐÐÉí·ÝÈÏÖ¤µÄ·½·¨¡£¸ÃÒÆ¶¯Éè±¸°üÀ¨£ºÌØÕ÷²É¼¯Éè±¸£»´æ´¢Æ÷£»µÚÒ»ÈË»ú½»»¥Éè±¸£»µÚ¶þÈË»ú½»»¥Éè±¸£»CPU£»Éí·ÝÈÏÖ¤Ð¾Æ¬£¬·Ö±ðÓëÌØÕ÷²É¼¯Éè±¸¡¢´æ´¢Æ÷¡¢CPU¡¢µÚÒ»ÈË»ú½»»¥Éè±¸ºÍµÚ¶þÈË»ú½»»¥Éè±¸Á¬½Ó£»ÔÚ°²È«Ä£Ê½ÏÂ£¬ÌØÕ÷²É¼¯Éè±¸ÔÚÉí·ÝÈÏÖ¤Ð¾Æ¬µÄ¿ØÖÆÏÂ²É¼¯ÌØÕ÷ÐÅÏ¢²¢·¢ËÍ¸øÉí·ÝÈÏÖ¤Ð¾Æ¬£»Éí·ÝÈÏÖ¤Ð¾Æ¬½«²É¼¯µÄÌØÕ÷ÐÅÏ¢Óë´æ´¢Æ÷ÖÐ´æ´¢µÄÌØÕ÷ÐÅÏ¢½øÐÐÆ¥Åä£¬Í¨¹ýµÚÒ»ÈË»ú½»»¥Éè±¸½«Æ¥Åä½á¹û´«µ…	°²È«
Ò»ÖÖ½ðÈÚÖÕ¶ËÉè±¸°²È«·½°¸µÄÉè¼Æ·½·¨¼°°²È«ÏµÍ³	Ó¢Ó²£¨ÉÏº££©ÐÅÏ¢¿Æ¼¼ÓÐÏÞ¹«Ë¾	2014-04-01	2014-07-09	CN103914663A	Ö÷·ÖÀàºÅ£ºG06F21/71(2013.01)I	Ê§Ð§-·¢Ã÷×¨ÀûÉêÇë¹«²¼ºóµÄÊÓÎª³·»Ø	200042 ÉÏº£ÊÐ¾²°²ÇøÐÂÕ¢Â·1609ºÅ4´±213ÊÒ	±¾·¢Ã÷Ìá¹©ÁËÒ»ÖÖ½ðÈÚÖÕ¶ËÉè±¸°²È«·½°¸µÄÉè¼Æ·½·¨¼°°²È«ÏµÍ³£¬½ðÈÚÖÕ¶ËÉè±¸ÖÐµÄÖ÷´¦ÀíÆ÷ÓÉ¸ßÐÔÄÜµÄÍ¨ÓÃ´¦ÀíÆ÷ºÍµÍÐÔÄÜµÄ°²È«´¦ÀíÆ÷¹²Í¬×é³É£»ÔËÐÐÊ±£¬ÓÉ°²È«´¦ÀíÆ÷À´Òýµ¼ºÍ·¢ËÍÍ¨ÓÃ´¦ÀíÆ÷µÄboot³ÌÐò²¢¿ØÖÆÆäÆô¶¯µçÂ·£¬Ö»ÓÐ¾­¹ý°²È«´¦ÀíÆ÷ÑéÖ¤µÄ°²È«boot²ÅÄÜ·¢ËÍ¸øÍ¨ÓÃ´¦ÀíÆ÷£¬Í¨ÓÃ´¦ÀíÆ÷½ÓÊÕµ½ÓÉ°²È«´¦ÀíÆ÷·¢ËÍµÄ¾­¹ýÑéÖ¤µÄbootºó²ÅÄÜÕý³£Æô¶¯£¬¶øºó´Ó´æ´¢½éÖÊÖÐ¶ÁÈë²Ù×÷ÏµÍ³£»°²È«´¦ÀíÆ÷´¦Àí°²È«µÈ¼¶¸ßµÄÐÅÏ¢Êý¾Ý£¬Í¨ÓÃ´¦ÀíÆ÷Ôò´…	°²È«
Êý¾Ý°²È«½»»¥·½·¨	ÌìµØÈÚ¿Æ¼¼¹É·ÝÓÐÏÞ¹«Ë¾	2014-04-25	2014-07-23	CN103944729A	Ö÷·ÖÀàºÅ£ºH04L9/32(2006.01)I	ÔÚÉó-ÊµÖÊÉó²éµÄÉúÐ§	100083 ±±¾©ÊÐº£µíÇøÑ§ÇåÂ·38ºÅB×ù1810	±¾·¢Ã÷Ìá¹©Ò»ÖÖÊý¾Ý°²È«½»»¥·½·¨£¬°üÀ¨£ºÖÕ¶Ë»ñµÃÉ¨Ãèµ½µÄÖÇÄÜÃÜÂëÉè±¸µÄ±êÊ¶ÐÅÏ¢£¬»ñÈ¡¶ÔÓ¦µÄÓÃ»§ÐÅÏ¢£¬½«ÓÃ»§ÐÅÏ¢´æ´¢µ½Ô¤ÏÈ½¨Á¢µÄµ±Ç°ÓÃ»§ÁÐ±íÖÐ£¬Éú³É½»Ò×ÐÅÏ¢£¬»ñµÃ½»Ò×ÇëÇóÐÅÏ¢£¬ÏòÖÇÄÜÃÜÂëÉè±¸·¢ËÍ½»Ò×ÇëÇóÐÅÏ¢£»ÖÇÄÜÃÜÂëÉè±¸»ñµÃ½»Ò×ÐÅÏ¢²¢ÌáÊ¾£¬²¢Éú³É½»Ò×È·ÈÏÐÅÏ¢£»ÖÕ¶Ë¸ù¾Ý½»Ò×È·ÈÏÐÅÏ¢»ñµÃ½»Ò×Êý¾Ý°ü£¬²¢ÏòºóÌ¨ÏµÍ³·þÎñÆ÷·¢ËÍ½»Ò×Êý¾Ý°ü£»ºóÌ¨ÏµÍ³·þÎñÆ÷¸ù¾Ý½»Ò×Êý¾Ý°ü»ñµÃ½»Ò×È·ÈÏÐÅÏ¢£¬¶Ô½»Ò×È·ÈÏÐÅÏ¢½øÐÐÑéÖ¤£¬²¢Ô…	°²È«
ÉúÎïÃÜÂëËø	Íô·çÕä	2014-04-27	2014-08-06	CN103971094A	Ö÷·ÖÀàºÅ£ºG06K9/00(2006.01)I	Ê§Ð§-·¢Ã÷×¨ÀûÉêÇë¹«²¼ºóµÄ²µ»Ø	427226 ºþÄÏÊ¡ÕÅ¼Ò½çÊÐ´ÈÀûÏØ¾°ÁúÇÅÏç¾®Èª´å9×é	ÉúÎïÃÜÂëËøÊÇÒ»ÖÖÃÜÂë¼¼Êõ£¬ËüÊÇÀûÓÃµçÄÔÄÚ´æÌõ¶ÏµçÖ®ºóËùÓÐµÄÊý¾Ý¼´ÏûÊ§Õâ¸öÌØÐÔÀ´¹¤×÷µÄ£¬½«ÉúÎïÊý¾ÝºÍ·þÎñÆ÷µÈ»ñµÃµÄÊý¾Ý½øÐÐ¼ÓÃÜ£¬´æÖüÔÚÍâ²¿Êý¾Ý´æÖü½éÖÊÉÏ£¬ÑéÖ¤Ê±ÓÉ·þÎñÆ÷·¢ËÍÊý¾Ý½øÐÐ½âÃÜ£¬ÕâÑùÊµÊ©±¾µØÉúÎïÑéÖ¤£¬Ò»µ©Íâ²¿Êý¾Ý´æÖü½éÖÊÍË³ö£¬¿Í»§¶Ë²»ÔÙÓÐÖ¸ÎÆÊý¾Ý£¬ÎÞÂÛÊÇ·þÎñÆ÷ºÍ¿Í»§¶Ë¶¼Ã»ÓÐÉúÎïÃÜÂëÐÅÏ¢£¬ÕâÑù£¬ºÚ¿Í¾ÍÎÞ·¨Í¨¹ýÍøÂç»ñµÃÉúÎïÃÜÂëÊý¾ÝÐÅÏ¢£¬ÑéÖ¤¹ý³ÌÊÜµ½·þÎñÆ÷¿ØÖÆ£¬ÑéÖ¤ÓÉ¿Í»§¶ËÍê³É£¬±¾¼¼Êõ¿ÉÒÔÊÊÓÃ°²±…	°²È«
ÃÜÂë¼üÅÌ¡¢Ö§¸¶ÏµÍ³¼°ÆäÖ§¸¶·½·¨	¸£½¨ÁªµÏÉÌÓÃÉè±¸ÓÐÏÞ¹«Ë¾	2014-05-05	2014-08-13	CN103984911A	Ö÷·ÖÀàºÅ£ºG06F21/83(2013.01)I	ÓÐÐ§-ÊÚÈ¨	350000 ¸£½¨Ê¡¸£ÖÝÊÐÈí¼þ´óµÀ89ºÅ¸£ÖÝÈí¼þÔ°Ò»Çø23ºÅÂ¥	±¾·¢Ã÷Ìá¹©ÁËÒ»ÖÖÃÜÂë¼üÅÌ¡¢Ö§¸¶ÏµÍ³¼°ÆäÖ§¸¶·½·¨£¬ÆäÖÐ£¬ÃÜÂë¼üÅÌ£¬°üÀ¨¼üÅÌ±¾Ìå¡¢ÃÜÔ¿ÊäÈë×é¼þÒÔ¼°Í¨ÐÅ½Ó¿Ú£¬ËùÊöÃÜÔ¿ÊäÈë×é¼þ°üÀ¨Êý×Ö¼üÎ»Ä£¿éÒÔ¼°¹¦ÄÜ¼üÎ»Ä£¿é£¬»¹°üÀ¨Éù²¨´¦Àí×é¼þ¡¢Êý¾Ý´¦ÀíÐ¾Æ¬£¬ËùÊöÉù²¨´¦Àí×é¼þÓëÊý¾Ý´¦ÀíÐ¾Æ¬µçÁ¬½Ó£¬ËùÊöÊý¾Ý´¦ÀíÐ¾Æ¬Í¨¹ýÍ¨ÐÅ½Ó¿ÚÓëPOSÖÕ¶ËµçÁ¬½Ó£»ËùÊöÉù²¨´¦Àí×é¼þ°üÀ¨Éù²¨½ÓÊÕÄ£¿é¡¢Éù²¨ÂË²¨Ä£¿é¡¢Éù²¨·Å´óÄ£¿éÒÔ¼°Éù²¨²ÉÑùÄ£¿é£¬ËùÊöÉù²¨½ÓÊÕÄ£¿éÓëÉù²¨ÂË²¨Ä£¿éµçÁ¬½Ó£¬ËùÊöÉù²¨ÂË²¨…	°²È«
WindowsÓ¦ÓÃ³ÌÐòÍêÕûÐÔÐ£ÑéÏµÍ³¡¢·½·¨¼°×°ÖÃ	ÎäººÌìÓ÷ÐÅÏ¢²úÒµ¹É·ÝÓÐÏÞ¹«Ë¾	2014-05-06	2014-08-27	CN104008351A	Ö÷·ÖÀàºÅ£ºG06F21/64(2013.01)I	ÓÐÐ§-ÊÚÈ¨	430223 ºþ±±Ê¡ÎäººÊÐ¶«ºþ¿ª·¢Çø»ªÖÐ¿Æ¼¼´óÑ§¿Æ¼¼Ô°ÌìÓ÷´óÏÃ	±¾·¢Ã÷¹«¿ªÁËÒ»ÖÖWindowsÓ¦ÓÃ³ÌÐòÍêÕûÐÔÐ£ÑéÏµÍ³¡¢·½·¨¼°×°ÖÃ£¬Éæ¼°½ðÈÚÖ§¸¶ÁìÓò¡£¸ÃÏµÍ³°üÀ¨ºóÌ¨·þÎñÆ÷¡¢ÉèÖÃÓÐ¿Í»§¶ËÓ¦ÓÃ³ÌÐòµÄ¿Í»§¶ËÉè±¸¡¢ÖÕ¶ËÉè±¸ºÍÖ¤Êé·þÎñÆ÷£»ºóÌ¨·þÎñÆ÷¡¢Ö¤Êé·þÎñÆ÷ºÍ¿Í»§¶ËÉè±¸¾ùÓëInternetÁ¬½Ó£¬¿Í»§¶ËÉè±¸ÓëÖÕ¶ËÉè±¸Á¬½Ó£»ÆäÌØÕ÷ÔÚÓÚ£ºËùÊöÖÕ¶ËÉè±¸°üÀ¨°²È«Ð¾Æ¬£¬ËùÊö°²È«Ð¾Æ¬°üÀ¨Ö÷¿ØÄ£¿é¡¢°²È«´æ´¢Ä£¿é¡¢°²È«Ëã·¨Ä£¿é¡¢Í¨ÐÅÄ£¿é¡£±¾·¢Ã÷ÄÜ¹»ÔÚ½ðÈÚÖ§¸¶¹ý³ÌÖÐÍê³É¶ÔÓ¦ÓÃ³ÌÐòÍêÕûÐÔµÄ¶àÖØÐ£Ñé£¬±È½Ï°²…	°²È«
Ò»ÖÖÓÃ»§È¨ÏÞµÄ·ÖÅä·½·¨ºÍÉè±¸	»ªÎª¼¼ÊõÓÐÏÞ¹«Ë¾	2014-05-15	2014-08-20	CN103995997A	Ö÷·ÖÀàºÅ£ºG06F21/32(2013.01)I	ÓÐÐ§-ÊÚÈ¨	518129 ¹ã¶«Ê¡ÉîÛÚÊÐÁú¸ÚÇøÛàÌï»ªÎª×Ü²¿°ì¹«Â¥	±¾·¢Ã÷¹«¿ªÁËÒ»ÖÖÓÃ»§È¨ÏÞµÄ·ÖÅä·½·¨ºÍÉè±¸£¬°üÀ¨£º»ñÈ¡µ±Ç°²É¼¯µ½ÓÃ»§µÄÈËÁ³ÌØÕ÷ÐÅÏ¢£»¸ù¾Ý»ñÈ¡µ½µÄËùÊöÓÃ»§µÄÈËÁ³ÌØÕ÷ÐÅÏ¢Óë´æ´¢µÄ±ê×¼Ñù±¾ÐÅÏ¢ÖÐ°üº¬µÄÈËÁ³ÌØÕ÷ÐÅÏ¢£¬È·¶¨µ±Ç°ËùÊöÓÃ»§µÄÈËÁ³ÌØÕ÷ÐÅÏ¢µÄ²îÒì¶È£»²¢¸ù¾ÝÈ·¶¨µÄËùÊö²îÒì¶È£¬ÎªËùÊöÓÃ»§·ÖÅäÓÃ»§È¨ÏÞ£¬Ïà¶ÔÓÚÊ¹ÓÃµÄ¹Ì¶¨ÈËÁ³ãÐÖµ·½Ê½À´Ëµ£¬Í¨¹ýÈ·¶¨µ±Ç°ËùÊöÓÃ»§µÄÈËÁ³ÌØÕ÷ÐÅÏ¢µÄ²îÒì¶È£¬ÔÚÎªÓÃ»§·ÖÅäÓÃ»§È¨ÏÞÊ±½«²É¼¯ÈËÁ³ÌØÕ÷ÐÅÏ¢ËùÊÜµ½µÄÍâ²¿ÒòËØÓ°Ïì×÷Îª²Î¿¼ÒòËØ£¬Ò…	°²È«
Ò»ÖÖÉí·ÝÑéÖ¤·½·¨¼°×°ÖÃ	Õã½­Î¬¶û¿Æ¼¼¹É·ÝÓÐÏÞ¹«Ë¾	2014-05-19	2014-07-30	CN103957107A	Ö÷·ÖÀàºÅ£ºH04L9/32(2006.01)I	ÔÚÉó-ÊµÖÊÉó²éµÄÉúÐ§	310012 Õã½­Ê¡º¼ÖÝÊÐ±õ½­ÇøÁùºÏÂ·368ºÅ±±4Â¥	±¾ÉêÇë¹«¿ªÁËÒ»ÖÖÉí·ÝÑéÖ¤·½·¨¼°×°ÖÃ£¬Ó¦ÓÃÓÚÖ§¸¶ÖÕ¶Ë£¬¸ÃÖ§¸¶ÖÕ¶ËÉÏÉèÖÃÓÐ¶à¸öÖ¸ÎÆ´«¸ÐÆ÷£¬¸Ã·½·¨Í¨¹ý½«ËùÊö¶à¸öÖ¸ÎÆ´«¸ÐÆ÷¸÷×Ô²É¼¯µÄ´ýÑéÖ¤Ö¸ÎÆÊý¾Ý·¢ËÍÖÁ·þÎñÆ÷£¬´¥·¢¸Ã·þÎñÆ÷²éÕÒÊÇ·ñ´æÔÚ·Ö±ðÓë¸÷¸öËùÊö´ýÑéÖ¤Ö¸ÎÆÊý¾ÝÏàÍ¬µÄ¶à¸öÖ¸ÎÆÊý¾Ý£¬ÈôÊÇ£¬½ø¶ø´¥·¢¸Ã·þÎñÆ÷Éú³ÉÉí·ÝÑéÖ¤³É¹¦µÄÐÅÏ¢£¬´Ó¶øÊµÏÖÁËÀûÓÃÖ§¸¶ÖÕ¶ËÉÏÉèÖÃµÄ¶à¸öÖ¸ÎÆ´«¸ÐÆ÷²É¼¯µÄ¶à¸öÖ¸ÎÆÊý¾Ý½øÐÐÉí·ÝÑéÖ¤£¬ÓÉÓÚ¸÷¸öÖ¸ÎÆÊý¾ÝÖ®¼ä¾ßÓÐ¼«¸ßµÄ²îÒìÐÔ£¬ËùÊö²ÉÓÃÖ¸ÎÆÊ…	°²È«
Ò»ÖÖÍøÒø½»Ò×°²È«ÅÐ¶ÏÓëÌáÊ¾·½·¨¼°ÏµÍ³	±±¾©ÎÕÆæÖÇÄÜ¿Æ¼¼ÓÐÏÞ¹«Ë¾	2014-05-20	2014-07-30	CN103955643A	Ö÷·ÖÀàºÅ£ºG06F21/34(2013.01)I	ÓÐÐ§-ÊÚÈ¨	100102 ±±¾©ÊÐ³¯ÑôÇøÍû¾©ÀûÔóÖÐÔ°101ºÅÆôÃ÷¹ú¼Ê´óÏÃÎ÷²à°Ë²ã	±¾·¢Ã÷¹«¿ªÁËÒ»ÖÖÍøÒø½»Ò×°²È«ÅÐ¶ÏÓëÌáÊ¾·½·¨¼°ÏµÍ³£¬Ê×ÏÈ½«ÒøÐÐ¿¨ÐÅÏ¢Êý¾Ý¿âÁÐ±í±£´æµ½ÍøÒø°²È«Éè±¸ÖÐ£¬½øÐÐÍøÒø½»Ò×Ê±£¬ÍøÒø°²È«Éè±¸¶ÔÍøÒø½»Ò×ÐÅÏ¢½øÐÐ½âÎö£¬µÃµ½¸ÃÍøÒø½»Ò×ÐÅÏ¢ÖÐ½ÓÊÜ·½ÒøÐÐ¿¨Ïà¹ØÐÅÏ¢£¬²¢¸ù¾ÝÏà¹ØÐÅÏ¢ÖÐµÄÒøÐÐ¿¨ºÅÔÚÒøÐÐ¿¨ÐÅÏ¢Êý¾Ý¿âÁÐ±íÖÐ½øÐÐ¼ìË÷£¬µÃµ½ÒøÐÐ¿¨ÐÅÏ¢Êý¾Ý¿âÁÐ±íÖÐ¶ÔÓ¦µÄÒøÐÐ¿¨Ïà¹ØÐÅÏ¢£¬×îºó½«ÍøÒø°²È«Éè±¸½âÎöµÃµ½µÄÒøÐÐ¿¨Ïà¹ØÐÅÏ¢ÓëÒøÐÐ¿¨ÐÅÏ¢Êý¾Ý¿âÁÐ±íÖÐ¼ìË÷µ½µÄÒøÐÐ¿¨Ïà¹ØÐÅÏ¢½øÐÐ±È¶ÔÈ·È…	°²È«
Éí·ÝÈÏÖ¤·½·¨ºÍÈÏÖ¤ÐÅÏ¢»ñÈ¡·½·¨	ÀîÑ©	2014-05-28	2014-08-06	CN103971043A	Ö÷·ÖÀàºÅ£ºG06F21/32(2013.01)I	Ê§Ð§-·¢Ã÷×¨ÀûÉêÇë¹«²¼ºóµÄ²µ»Ø	200127 ÉÏº£ÊÐÆÖ¶«ÐÂÇøÆÖ½¨Â·145ºÅÇ¿Éú´óÏÃ2701ÊÒ	±¾·¢Ã÷Éæ¼°Éí·ÝÈÏÖ¤ÁìÓò£¬¾ßÌå¶øÑÔ£¬Éæ¼°Éí·ÝÈÏÖ¤·½·¨ºÍÈÏÖ¤ÐÅÏ¢»ñÈ¡·½·¨¡£¸ÃÉí·ÝÈÏÖ¤·½·¨£¬°üÀ¨£º»ñÈ¡´ýÈÏÖ¤ÕßµÄÉí·ÝÐÅÏ¢ºÍ´ýÈÏÖ¤ÉúÎïÌØÕ÷ÐÅÏ¢£¬ËùÊöÉí·ÝÐÅÏ¢Óë´ýÈÏÖ¤ÉúÎïÌØÕ÷ÐÅÏ¢ÊÇÏà¶ÔÓ¦µÄ£»¸ù¾ÝËùÊöÉí·ÝÐÅÏ¢ÔÚÔ¤ÉèµÄÊý¾Ý¿âÖÐ¼ìË÷ÓëËùÊö´ýÈÏÖ¤Éí·ÝÐÅÏ¢Ïà¶ÔÓ¦µÄÈÏÖ¤ÉúÎïÌØÕ÷ÐÅÏ¢£»Èô¼ìË÷µ½ËùÊöÈÏÖ¤ÉúÎïÌØÕ÷ÐÅÏ¢£¬Ôò¶Ô±ÈËùÊöÈÏÖ¤ÉúÎïÌØÕ÷ÐÅÏ¢ºÍËùÊö´ýÈÏÖ¤ÉúÎïÌØÕ÷ÐÅÏ¢£¬ÒÔ»ñµÃÁ½ÕßµÄÏàËÆ¶ÈÖµ£»ÈôÏàËÆ¶ÈÖµ³¬¹ýÔ¤ÉèµÄãÐÖµ£¬ÔòÉí·ÝÈ…	°²È«
°²È«ÊÖ»ú	ÌìµØÈÚ¿Æ¼¼¹É·ÝÓÐÏÞ¹«Ë¾	2014-05-28	2014-08-20	CN103996117A	Ö÷·ÖÀàºÅ£ºG06Q20/32(2012.01)I	ÓÐÐ§-ÊÚÈ¨	100083 ±±¾©ÊÐº£µíÇøÑ§ÇåÂ·38ºÅB×ù1810	±¾·¢Ã÷Ìá¹©ÁËÒ»ÖÖ°²È«ÊÖ»ú£¬°üÀ¨£ºÊÖ»ú´¦ÀíÄ£¿é¡¢ÐÅÏ¢´¦ÀíÄ£¿é¡¢°²È«Ä£¿é¼°ÏÔÊ¾×é¼þ£»ÏÔÊ¾×é¼þ°üÀ¨£ºµÚÒ»ÏÔÊ¾Çø¼°µÚ¶þÏÔÊ¾Çø£»µÚÒ»ÏÔÊ¾Çø¼°µÚ¶þÏÔÊ¾Çø¶ÀÁ¢½øÐÐÏÔÊ¾£»ÊÖ»ú´¦ÀíÄ£¿é£¬ÓÃÓÚ½«µÚÒ»ÐÅÏ¢·¢ËÍÖÁ°²È«Ä£¿é£¬ºÍ/»ò½ÓÊÕ°²È«Ä£¿é·¢ËÍµÄµÚ¶þÐÅÏ¢£»°²È«Ä£¿é£¬ÓÃÓÚ½ÓÊÕÊÖ»ú´¦ÀíÄ£¿é·¢ËÍµÄµÚÒ»ÐÅÏ¢£¬ºÍ/»òÊä³öµÚ¶þÐÅÏ¢ÖÁÊÖ»ú´¦ÀíÄ£¿é£»°²È«Ä£¿é£¬»¹ÓÃÓÚÊä³öµÚÈýÐÅÏ¢ÖÁÐÅÏ¢´¦ÀíÄ£¿é£»ÐÅÏ¢´¦ÀíÄ£¿é£¬ÓÃÓÚ½ÓÊÕ°²È«Ä£¿éÊä³öµÄµÚÈýÐÅÏ¢£…	°²È«
ÒÆ¶¯ÖÕ¶ËµÄ°²È«Ö§¸¶·½·¨¼°×°ÖÃ	±±¾©Ææ»¢¿Æ¼¼ÓÐÏÞ¹«Ë¾	2014-06-10	2014-09-03	CN104021339A	Ö÷·ÖÀàºÅ£ºG06F21/51(2013.01)I	Ê§Ð§-·¢Ã÷×¨ÀûÉêÇë¹«²¼ºóµÄ²µ»Ø	100088 ±±¾©ÊÐÎ÷³ÇÇøÐÂ½Ö¿ÚÍâ´ó½Ö28ºÅD×ù112ÊÒ£¨µÂÊ¤Ô°Çø£©	±¾·¢Ã÷Ìá¹©ÁËÒ»ÖÖÒÆ¶¯ÖÕ¶ËµÄ°²È«Ö§¸¶·½·¨¼°×°ÖÃ¡£ÆäÖÐ£¬¸Ã·½·¨°üÀ¨£º¼à²âµ½°²×°ÓÚÒÆ¶¯ÖÕ¶ËµÄÖ§¸¶ÀàÈí¼þÆô¶¯Ê±£¬»ñÈ¡Ö§¸¶ÀàÈí¼þµÄÉí·Ý±êÊ¶ÐÅÏ¢£¬ÆäÖÐ£¬Éí·Ý±êÊ¶ÐÅÏ¢°üÀ¨ÏÂÁÐÖÁÉÙÖ®Ò»£ºÖ§¸¶ÀàÈí¼þµÄ°üÃûÐÅÏ¢¡¢Ö§¸¶ÀàÈí¼þµÄ°æ±¾ÐÅÏ¢¡¢Ö§¸¶ÀàÈí¼þµÄÇ©ÃûÐÅÏ¢£»¸ù¾ÝÖ§¸¶ÀàÈí¼þµÄÉí·Ý±êÊ¶ÐÅÏ¢È·¶¨Ö§¸¶ÀàÈí¼þ°²È«ÐÔÊÇ·ñÍ¨¹ýÑéÖ¤£»ÈôÊÇ£¬ÀûÓÃÖ§¸¶ÀàÈí¼þÖ´ÐÐÖ§¸¶²Ù×÷¡£ÒÀ¾Ý±¾·¢Ã÷ÊµÊ©ÀýÄÜ¹»½â¾öÏÖÓÐ¼¼ÊõÖÐ²»ÄÜ¹»¶ÔÖ§¸¶ÀàÈí¼þ°²È«ÐÔ½øÐÐÑéÖ¤µ…	°²È«
Ò»ÖÖ´©´÷Ê½ÒøÐÐÒµÎñµç×ÓÈÕÖ¾Éè±¸·ÀÇÀ¼°ÐÅÏ¢×Ô»ÙµÄ·½·¨	Ì·Ï£èº	2014-06-29	2014-09-17	CN104050404A	Ö÷·ÖÀàºÅ£ºG06F21/32(2013.01)I	ÓÐÐ§-ÊÚÈ¨	528100 ¹ã¶«Ê¡·ðÉ½ÊÐÈýË®ÇøÎ÷ÄÏ½ÖµÀÉ³Í·´óµÀ15ºÅ°ë½­»¨Ô°7×ù804	Ò»ÖÖ´©´÷Ê½ÒøÐÐÒµÎñµç×ÓÈÕÖ¾Éè±¸·ÀÇÀ¼°ÐÅÏ¢×Ô»ÙµÄ·½·¨£¬°üÀ¨ÒøÐÐÒµÎñ·þÎñÆ÷¡¢´©´÷Ê½ÒøÐÐÒµÎñµç×ÓÈÕÖ¾Éè±¸¡¢Íó´ø×°ÖÃ¡£ÒøÐÐÒµÎñ·þÎñÆ÷ÓÃÓÚ´¦ÀíÒøÐÐÒµÎñ£¬ÉèÖÃ·ÀÇÀ¼°ÐÅÏ¢×Ô»ÙÐÅÏ¢¡£´©´÷Ê½ÒøÐÐÒµÎñµç×ÓÈÕÖ¾Éè±¸ÓÃÓÚ¼ÇÂ¼¹¤×÷ÈÕÖ¾¡¢½ÓÊÜÓªÏúÖ¸Òý¡¢½ÓÊÜ¹¤×÷Ö¸Òý¡¢²Î¼ÓÒøÐÐÒµÎñ»áÒé¡£Íó´ø×°ÖÃÓÃÓÚ½«´©´÷Ê½µç×ÓÈÕÖ¾Éè±¸¹Ì¶¨ÔÚÊÖÉÏ£¬°üÀ¨£ºµÚ¶þÎÂ¶È¸ÐÓ¦Æ÷¡¢Æ¤·ôÐ¾Æ¬¡£	°²È«
Ò»ÖÖ»ùÓÚÒøÐÐ×ÔÖúÏµÍ³µÄÓÃ»§Éí·ÝÈÏÖ¤·½·¨	ÀË³±£¨É½¶«£©µç×ÓÐÅÏ¢ÓÐÏÞ¹«Ë¾	2014-07-03	2014-10-08	CN104091105A	Ö÷·ÖÀàºÅ£ºG06F21/32(2013.01)I	Ê§Ð§-·¢Ã÷×¨ÀûÉêÇë¹«²¼ºóµÄ²µ»Ø	250101 É½¶«Ê¡¼ÃÄÏÊÐ¸ßÐÂÇøË´ÑÅÂ·1036ºÅ	±¾·¢Ã÷¹«¿ªÁËÒ»ÖÖ»ùÓÚÒøÐÐ×ÔÖúÏµÍ³µÄÓÃ»§Éí·ÝÈÏÖ¤·½·¨£¬ËùÊöÈÏÖ¤·½·¨°üÀ¨£º¶ÁÈ¡ÒøÐÐ×ÔÖúÏµÍ³ÓÃ»§µÄÉí·ÝÖ¤ÐÅÏ¢£»²É¼¯ËùÊöÓÃ»§µÄÖ¸ÎÆÐÅÏ¢£»»ùÓÚÔ¤Éè°²È«¼¶±ð£¬±È¶ÔËùÊöÉí·ÝÖ¤ÖÐµÄÖ¸ÎÆÐÅÏ¢ºÍËùÊö²É¼¯Ö¸ÎÆÐÅÏ¢£¬Èç¹û±È¶Ô³É¹¦Ôò±íÊ¾ÒøÐÐ×ÔÖúÏµÍ³µÄÓÃ»§Éí·ÝÈÏÖ¤Í¨¹ý£¬·ñÔò±íÊ¾ÒøÐÐ×ÔÖúÏµÍ³µÄÓÃ»§Éí·ÝÈÏÖ¤²»Í¨¹ý¡£²ÉÓÃ±¾·¢Ã÷ËùÌá¹©µÄ¼¼Êõ£¬Í¨¹ý±È¶ÔÓÃ»§Éí·ÝÖ¤ÖÐµÄÖ¸ÎÆÐÅÏ¢ºÍ²É¼¯µÄÖ¸ÎÆÐÅÏ¢£¬ÅÐ¶ÏÓÃ»§ÊÇ³Ö±¾ÈËÉí·ÝÖ¤µÄÇé¿öÏÂ²ÅÎªÓÃ»§Ìá¹©º…	°²È«
ÒÆ¶¯Ö§¸¶ÖÐµÄÖ÷¶¯Ê½ÖÐÑë¿ØÖÆÉè±¸ºÍ·½·¨	ÁÉÄþ¼ÎÁª¿Æ¼¼ÓÐÏÞ¹«Ë¾	2014-07-09	2014-10-01	CN104077687A	Ö÷·ÖÀàºÅ£ºG06Q20/32(2012.01)I	Ê§Ð§-·¢Ã÷×¨ÀûÉêÇë¹«²¼ºóµÄÊÓÎª³·»Ø	110168 ÁÉÄþÊ¡ÉòÑôÊÐ¶«ÁêÇø£¨»ëÄÏÐÂÇø£©ÎÄËÝ½Ö19-1ºÅ313ÊÒ	Ò»ÖÖÒÆ¶¯Ö§¸¶ÖÐÊ¹ÓÃµÄÉè±¸£¬°üÀ¨¶ú»ú²åÍ·¡¢Ð­Òé×ª»»ºÍÈ¡µçÄ£¿é¡¢Ë¢¿¨ÌìÏß¡¢Ò»¸ö»ò¶à¸ö¿ÉÑ¡µÄ¹¦ÄÜÄ£¿é£¬»¹°üÀ¨ÖÐÑë¿ØÖÆÐ¾Æ¬£¬ÖÐÑë¿ØÖÆÐ¾Æ¬µÄÊäÈë¶Ë¿ÚÁ¬½ÓÐ­Òé×ª»»ºÍÈ¡µçÄ£¿é£¬ÖÐÑë¿ØÖÆÐ¾Æ¬µÄÊä³ö¶Ë¿ÚÓë¸÷¹¦ÄÜÄ£¿éµÄÊäÈë¶Ë¿ÚÍ¨Ñ¶Á¬½Ó£¬ÖÐÑë¿ØÖÆÐ¾Æ¬µÄRF¶Ë¿ÚÓëË¢¿¨ÌìÏßµçÐÔÁ¬½Ó¡£»¹Ìá¹©Ò»ÖÖÒÆ¶¯Ö§¸¶ÖÐÉè±¸µÄÊ¹ÓÃ·½·¨¡£Í¨¹ýÒýÈëÖÐÑë¿ØÖÆÐ¾Æ¬£¬ÔÚ¹¦ÄÜÄ£¿é½ÓÊÕµ½½»Ò×»ò¹¤×÷ÇëÇóÇ°£¬Í¨¹ýÖÐÑë¿ØÖÆÐ¾Æ¬À´ÅÐ¶ÏÄ¿±ê¹¦ÄÜÄ£¿éµÄÔÊÐí/½ûÖ¹×´Ì¬£¬…	Ö§¸¶
¶ÔÒÆ¶¯Ö§¸¶½»Ò×Êý¾Ý½øÐÐ°²È«´¦ÀíºÍ´æ´¢µÄÉè±¸¼°·½·¨	ÁÉÄþ¼ÎÁª¿Æ¼¼ÓÐÏÞ¹«Ë¾	2014-07-09	2014-10-01	CN104077686A	Ö÷·ÖÀàºÅ£ºG06Q20/32(2012.01)I	Ê§Ð§-·¢Ã÷×¨ÀûÉêÇë¹«²¼ºóµÄÊÓÎª³·»Ø	110168 ÁÉÄþÊ¡ÉòÑôÊÐ¶«ÁêÇø£¨»ëÄÏÐÂÇø£©ÎÄËÝ½Ö19-1ºÅ313ÊÒ	±¾·¢Ã÷ÊÊÓÚÒÆ¶¯Ö§¸¶ÁìÓò£¬Ìá¹©ÁËÒ»ÖÖ¶ÔÒÆ¶¯Ö§¸¶½»Ò×Êý¾Ý½øÐÐ°²È«´¦ÀíºÍ´æ´¢µÄÉè±¸£¬Í¨¹ýÌí¼Ó´óÈÝÁ¿µÄ°²È«Êý¾Ý´æ´¢Æ÷£¬½â¾öÁËÒÆ¶¯Ö§¸¶ÖÐ´óÁ¿ÏßÉÏºÍÏßÏÂ½»Ò×Êý¾ÝµÄ´æ´¢ÎÊÌâ£»Í¨¹ýÌí¼ÓÄÚÇ¶Êý¾Ý°²È«´¦Àíµ¥ÔªµÄÖÐÑë¿ØÖÆÐ¾Æ¬£¬ÊµÏÖ¶ÔÃô¸ÐÊý¾ÝµÄ¼ÓÃÜ´¦ÀíºÍ´æ´¢£»ÓÃÓÚ°²È«¹¦ÄÜµÄËã·¨ºÍÃÜÔ¿Ö±½Ó´æ´¢ÓÚÖÐÑë¿ØÖÆÐ¾Æ¬ÖÐ£¬±ÜÃâÒÆ¶¯ÖÕ¶Ë²¡¶¾¡¢Ä¾ÂíµÄÎ£º¦ºÍ¶ñÒâ¹¥»÷¡¢ÆÆ½â£»ÖÐÑë¿ØÖÆÐ¾Æ¬Ö§³Ö¶àÖÖ°²È«Ëã·¨ºÍÃÜÔ¿£¬Í¬Ê±Ö§³Ö°²È«Ëã·¨ºÍÃÜÔ¿µÄ¶¯Ì¬¸üÐ…	°²È«
»ùÓÚÊÖ»úÒôÆµ²å¿ÚÊµÏÖ¿ÕÖÐÈ¦´æµÄ·½·¨ºÍÉè±¸	ÁÉÄþ¼ÎÁª¿Æ¼¼ÓÐÏÞ¹«Ë¾	2014-07-09	2014-09-17	CN104050563A	Ö÷·ÖÀàºÅ£ºG06Q20/32(2012.01)I	Ê§Ð§-·¢Ã÷×¨ÀûÉêÇë¹«²¼ºóµÄÊÓÎª³·»Ø	110168 ÁÉÄþÊ¡ÉòÑôÊÐ¶«ÁêÇø£¨»ëÄÏÐÂÇø£©ÎÄËÝ½Ö19-1ºÅ313ÊÒ	±¾·¢Ã÷Éæ¼°ÒÆ¶¯Ö§¸¶ÁìÓò£¬Ìá¹©ÁËÒ»ÖÖ»ùÓÚÒÆ¶¯Éè±¸ÒôÆµ²å¿ÚÊµÏÖ¿ÕÖÐÈ¦´æµÄÉè±¸£¬°üÀ¨¶ú»ú²åÍ·¡¢Ð­Òé×ª»»ºÍÈ¡µçÄ£¿é¡¢Ë¢¿¨ÌìÏß¡¢Ò»¸ö»ò¶à¸ö¿ÉÑ¡µÄ¹¦ÄÜÄ£¿é£¬»¹°üÀ¨µç×ÓÇ®°ü´æ´¢ÔØÌå£¬µç×ÓÇ®°ü´æ´¢ÔØÌå½ÓÊÕºÍ´¦ÀíÒÆ¶¯Éè±¸¿Í»§¶ËÈí¼þ·¢ËÍµÄµç×ÓÇ®°üÏà¹ØÃüÁî£¬²¢Í¨¹ýË¢¿¨ÌìÏßÍ¬Íâ²¿½øÐÐÎÞÏßÍ¨Ñ¶£¬ÊµÏÖ·Ç½Ó´¥Ê½Ë¢¿¨¡£±¾·¢Ã÷»¹Ìá¹©ÁËÒ»ÖÖ»ùÓÚÒÆ¶¯Éè±¸ÒôÆµ²å¿ÚÊµÏÖ¿ÕÖÐÈ¦´æµÄ·½·¨¡£Í¨¹ýÒýÈëµç×ÓÇ®°ü´æ´¢ÔØÌå£¬ÄÜ±ÜÃâÏÖÓÐ²úÆ·Íê³É¿ÕÖÐÈ¦´æ±…	Ö§¸¶
Ò»ÖÖATM»ú´¢¿¨Æ÷¼°È¡¿¨·½·¨	ÉîÛÚâù»¯µçÄÔ¹É·ÝÓÐÏÞ¹«Ë¾	2014-07-17	2014-11-19	CN104157084A	Ö÷·ÖÀàºÅ£ºG07F19/00(2006.01)I	ÓÐÐ§-ÊÚÈ¨	518000 ¹ã¶«Ê¡ÉîÛÚÊÐ¸£ÌïÇø½ðÌïÂ·4018ºÅ°²Áª´óÏÃ27Â¥A02	±¾·¢Ã÷¹«¿ªÒ»ÖÖATM»ú´¢¿¨Æ÷¼°È¡¿¨·½·¨£¬°üº¬´¢¿¨Ïä¡¢Éý½µ°å£¬ÍÐ°å£¬ËùÊöµÄ´¢¿¨ÏäÄÚÔÝ´æ±»Ç¿ÖÆÊÕ»ØµÄÒøÐÐ¿¨£¬ËùÊö´¢¿¨ÏäµÄ²à±ÚÉèÓÐ¿¨³öÈë¿Ú£¬ËùÊöµÄÉý½µ°åÉèÖÃÔÚ´¢¿¨ÏäÄÚ£¬²¢ÇÒËùÊöµÄÉý½µ°åÉÏÉèÖÃÓÐÍÐ°å£¬ËùÊöµÄÍÐ°å¿ÉÒÔÑØ×ÅÉý½µ°åÔÚË®Æ½·½Ïò½øÐÐ¿¿½ü¿¨³öÈë¿Ú·½ÏòºÍÔ¶Àë¿¨³öÈë¿Ú·½ÏòµÄÒÆ¶¯£¬ËùÊöµÄÉý½µ°åÔÚµç»ú×÷ÓÃÏÂÑØ×Å´¢¿¨ÏäÄÚ²à±ÚÉÏÏÂÔË¶¯¡£ÊµÏÖµÄ´¢¿¨Æ÷¿ÉÒÔÊ¹ÓÃ»§ÒøÐÐ¿¨±»ATM»úÇ¿ÐÐÍÌµôÖ®ºó£¬ÔÚÓÃ»§µÄÇëÇóÏÂÖðÒ»É¸Ñ¡´¢¿¨Æ÷ÄÚµ…	°²È«
ÃÜÂëÊäÈë·½·¨¡¢ÒÆ¶¯Éè±¸¡¢ÃÜÂëÖÕ¶Ë¼°ÃÜÂëÊäÈëÏµÍ³	TCL¼¯ÍÅ¹É·ÝÓÐÏÞ¹«Ë¾	2014-07-18	2014-10-29	CN104123487A	Ö÷·ÖÀàºÅ£ºG06F21/35(2013.01)I	ÓÐÐ§-ÊÚÈ¨	516006 ¹ã¶«Ê¡»ÝÖÝÊÐÖÙâý¸ßÐÂ¼¼Êõ¿ª·¢ÇøÊ®¾ÅºÅÐ¡Çø	±¾·¢Ã÷ÊÊÓÃÓÚÐÅÏ¢°²È«ÁìÓò£¬Ìá¹©ÁËÒ»ÖÖÃÜÂëÊäÈë·½·¨¡¢ÒÆ¶¯Éè±¸¡¢ÃÜÂëÖÕ¶Ë¼°ÃÜÂëÊäÈëÏµÍ³¡£ËùÊö·½·¨°üÀ¨£º½ÓÊÕÃÜÂëÖÕ¶Ë·¢ËÍµÄÒµÎñÊ¶±ðÂë£¬ËùÊöÒµÎñÊ¶±ðÂë°üº¬ÓÐËùÊöÃÜÂëÖÕ¶ËµÄÉí·ÝÐÅÏ¢£»¸ù¾Ý½ÓÊÕµÄÒµÎñÊ¶±ðÂëÑéÖ¤ËùÊöÃÜÂëÖÕ¶ËµÄÓÐÐ§ÐÔ£»ÔÚËùÊöÃÜÂëÖÕ¶ËÓÐÐ§Ê±£¬½«µÚÒ»ÃÜÂë¿¨ºÍÀûÓÃËùÊöµÚÒ»ÃÜÂë¿¨¼ÓÃÜÔ­Ê¼ÃÜÂëÒ³µÃµ½µÄ×îÖÕÃÜÂëÒ³·¢ËÍ¸øËùÊöÃÜÂëÖÕ¶Ë£¬ÒÔÊ¹ËùÊöÃÜÂëÖÕ¶Ë¸ù¾Ý½ÓÊÕµÄµÚÒ»ÃÜÂë¿¨½âÃÜËùÊö×îÖÕÃÜÂëÒ³£¬²¢½«½âÃÜµÄ½á¹û·¢ËÍÖÁÒ…	°²È«
ÀûÓÃÊÓÍøÄ¤ÑéÖ¤µÄ¶àÄ£Ì¬ÍøÒø½áËãÈÏÖ¤·½·¨	ÖÐÉ½ÒÕÕ¹×°ÊÎ¹¤³ÌÓÐÏÞ¹«Ë¾	2014-07-30	2014-10-15	CN104102867A	Ö÷·ÖÀàºÅ£ºG06F21/32(2013.01)I	Ê§Ð§-·¢Ã÷×¨ÀûÉêÇë¹«²¼ºóµÄ²µ»Ø	528437 ¹ã¶«Ê¡ÖÐÉ½ÊÐ»ð¾æ¿ª·¢Çø¿µÀÖ´óµÀ30ºÅÖ®ÆßÊ®°ËA¿¨	ÀûÓÃÊÓÍøÄ¤ÑéÖ¤µÄ¶àÄ£Ì¬ÍøÒø½áËãÈÏÖ¤·½·¨£¬°üÀ¨ÍøÉÏÒøÐÐÖÕ¶ËUkeyºÍÍøÉÏÒøÐÐºóÌ¨Éí·ÝÈÏÖ¤Êý¾Ý¿â£¬ËùÊöµÄÍøÉÏÒøÐÐÖÕ¶ËUkeyÖÐÉèÖÃÓÐÊÓÍøÄ¤²É¼¯Ê¶±ðÄ£¿é¡¢ÌåÎÂ´«¸ÐÆ÷¡¢Âö²«´«¸ÐÆ÷¡¢ÐÄÂÊ´«¸ÐÆ÷ºÍÐÅÏ¢ÌØÕ÷ÖµÌáÈ¡Ä£¿é£¬ÔÚÍøÉÏÒøÐÐºóÌ¨Éí·ÝÈÏÖ¤Êý¾Ý¿âÖÐÉèÖÃÓÐÊÓÍøÄ¤ÐÅÏ¢ÌØÕ÷Öµ±È¶Ô´¦ÀíÄ£¿é£¬ÓÃÓÚ¶ÔÍøÉÏÒøÐÐÖÕ¶ËUkeyËùÌáÈ¡ÓÃ»§µÄÊÓÍøÄ¤ÌØÕ÷ÖµÓë´æ´¢ÔÚ¸ÃÊý¾Ý¿âÖÐÓë¸ÃÍøÉÏÒøÐÐÖÕ¶ËUkeyÆ¥ÅäµÄ¸ÃÓÃ»§µÄÊÓÍøÄ¤ÌØÕ÷Öµ½øÐÐÊµÊ±±È¶Ô£¬ÒÔÅÐ¶Ï¸ÃÓÃ»§Ê…	°²È«
Ò»ÖÖ»ùÓÚ»îÌåÖ¸ÎÆÑéÖ¤µÄÍøÉÏÒøÐÐ°²È«ÈÏÖ¤·½·¨	ÖÐÉ½ÊÐÆ·»ã´´ÐÂ×¨Àû¼¼Êõ¿ª·¢ÓÐÏÞ¹«Ë¾	2014-07-31	2014-11-05	CN104134030A	Ö÷·ÖÀàºÅ£ºG06F21/32(2013.01)I	Ê§Ð§-·¢Ã÷×¨ÀûÉêÇë¹«²¼ºóµÄ³·»Ø	528437 ¹ã¶«Ê¡ÖÐÉ½ÊÐ»ð¾æ¿ª·¢ÇøÖÐÉ½¸Û´óµÀ99ºÅ½ðÊ¢¹ã³¡1ºÅÉÌÒµÂ¥407·¿	Ò»ÖÖ»ùÓÚ»îÌåÖ¸ÎÆÑéÖ¤µÄÍøÉÏÒøÐÐ°²È«ÈÏÖ¤·½·¨£¬°üÀ¨ÍøÉÏÒøÐÐÖÕ¶ËUkeyºÍÍøÉÏÒøÐÐºóÌ¨Éí·ÝÈÏÖ¤Êý¾Ý¿â£¬ËùÊöµÄÍøÉÏÒøÐÐÖÕ¶ËUkeyÖÐÉèÖÃÓÐÖ¸ÎÆ²É¼¯Ê¶±ðÄ£¿é¡¢ÌåÎÂ´«¸ÐÆ÷¡¢Âö²«´«¸ÐÆ÷¡¢ÐÄÂÊ´«¸ÐÆ÷ºÍÐÅÏ¢ÌØÕ÷ÖµÌáÈ¡Ä£¿é£¬ÔÚÍøÉÏÒøÐÐºóÌ¨Éí·ÝÈÏÖ¤Êý¾Ý¿âÖÐÉèÖÃÓÐÖ¸ÎÆÐÅÏ¢ÌØÕ÷Öµ±È¶Ô´¦ÀíÄ£¿é£¬ÓÃÓÚ¶ÔÍøÉÏÒøÐÐÖÕ¶ËUkeyËùÌáÈ¡ÓÃ»§µÄÖ¸ÎÆÌØÕ÷ÖµÓë´æ´¢ÔÚ¸ÃÊý¾Ý¿âÖÐÓë¸ÃÍøÉÏÒøÐÐÖÕ¶ËUkeyÆ¥ÅäµÄ¸ÃÓÃ»§µÄÖ¸ÎÆÌØÕ÷Öµ½øÐÐÊµÊ±±È¶Ô£¬ÒÔÅÐ¶Ï¸ÃÓÃ»§ÊÇ·ñÎ…	°²È«
Ò»ÖÖ»ùÓÚÉùÒôÊ¶±ðÑéÖ¤µÄ¶àÍ¨µÀÍøÒø°²È«ÈÏÖ¤·½·¨	ÖÐÉ½ÊÐÆ·»ã´´ÐÂ×¨Àû¼¼Êõ¿ª·¢ÓÐÏÞ¹«Ë¾	2014-07-31	2014-11-05	CN104134029A	Ö÷·ÖÀàºÅ£ºG06F21/32(2013.01)I	Ê§Ð§-·¢Ã÷×¨ÀûÉêÇë¹«²¼ºóµÄ³·»Ø	528437 ¹ã¶«Ê¡ÖÐÉ½ÊÐ»ð¾æ¿ª·¢ÇøÖÐÉ½¸Û´óµÀ99ºÅ½ðÊ¢¹ã³¡1ºÅÉÌÒµÂ¥407·¿	Ò»ÖÖ»ùÓÚÉùÒôÊ¶±ðÑéÖ¤µÄ¶àÍ¨µÀÍøÒø°²È«ÈÏÖ¤·½·¨£¬°üÀ¨ÍøÉÏÒøÐÐÖÕ¶ËUkeyºÍÍøÉÏÒøÐÐºóÌ¨Éí·ÝÈÏÖ¤Êý¾Ý¿â£¬ËùÊöµÄÍøÉÏÒøÐÐÖÕ¶ËUkeyÖÐÉèÖÃÓÐÉùÒô²É¼¯Ê¶±ðÄ£¿é¡¢ÌåÎÂ´«¸ÐÆ÷¡¢Âö²«´«¸ÐÆ÷¡¢ÐÄÂÊ´«¸ÐÆ÷ºÍÐÅÏ¢ÌØÕ÷ÖµÌáÈ¡Ä£¿é£¬ÔÚÍøÉÏÒøÐÐºóÌ¨Éí·ÝÈÏÖ¤Êý¾Ý¿âÖÐÉèÖÃÓÐÉùÒôÐÅÏ¢ÌØÕ÷Öµ±È¶Ô´¦ÀíÄ£¿é£¬ÓÃÓÚ¶ÔÍøÉÏÒøÐÐÖÕ¶ËUkeyËùÌáÈ¡ÓÃ»§µÄÉùÒôÌØÕ÷ÖµÓë´æ´¢ÔÚ¸ÃÊý¾Ý¿âÖÐÓë¸ÃÍøÉÏÒøÐÐÖÕ¶ËUkeyÆ¥ÅäµÄ¸ÃÓÃ»§µÄÉùÒôÌØÕ÷Öµ½øÐÐÊµÊ±±È¶Ô£¬ÒÔÅÐ¶Ï¸ÃÓÃ»§ÊÇ·…	°²È«
Ò»ÖÖ»ùÓÚÈËÁ³Ê¶±ð¼¼ÊõµÄ¶àÄ£Ì¬Usb KeyÈÏÖ¤µÄ·½·¨	ÖÐÉ½ÊÐÆ·»ã´´ÐÂ×¨Àû¼¼Êõ¿ª·¢ÓÐÏÞ¹«Ë¾	2014-07-31	2014-10-15	CN104102868A	Ö÷·ÖÀàºÅ£ºG06F21/32(2013.01)I	Ê§Ð§-·¢Ã÷×¨ÀûÉêÇë¹«²¼ºóµÄ³·»Ø	528437 ¹ã¶«Ê¡ÖÐÉ½ÊÐ»ð¾æ¿ª·¢ÇøÖÐÉ½¸Û´óµÀ99ºÅ½ðÊ¢¹ã³¡1ºÅÉÌÒµÂ¥407·¿	Ò»ÖÖ»ùÓÚÈËÁ³Ê¶±ð¼¼ÊõµÄ¶àÄ£Ì¬UsbKeyÈÏÖ¤µÄ·½·¨£¬°üÀ¨ÍøÉÏÒøÐÐÖÕ¶ËUsbKeyºÍÍøÉÏÒøÐÐºóÌ¨Éí·ÝÈÏÖ¤Êý¾Ý¿â£¬ËùÊöµÄÍøÉÏÒøÐÐÖÕ¶ËUsbKeyÖÐÉèÖÃÓÐÈËÁ³²É¼¯Ê¶±ðÄ£¿é¡¢ÌåÎÂ´«¸ÐÆ÷¡¢Âö²«´«¸ÐÆ÷¡¢ÐÄÂÊ´«¸ÐÆ÷ºÍÐÅÏ¢ÌØÕ÷ÖµÌáÈ¡Ä£¿é£¬ÔÚÍøÉÏÒøÐÐºóÌ¨Éí·ÝÈÏÖ¤Êý¾Ý¿âÖÐÉèÖÃÓÐÈËÁ³ÐÅÏ¢ÌØÕ÷Öµ±È¶Ô´¦ÀíÄ£¿é£¬ÓÃÓÚ¶ÔÍøÉÏÒøÐÐÖÕ¶ËUsbKeyËùÌáÈ¡ÓÃ»§µÄÈËÁ³ÌØÕ÷ÖµÓë´æ´¢ÔÚ¸ÃÊý¾Ý¿âÖÐÓë¸ÃÍøÉÏÒøÐÐÖÕ¶ËUsbKeyÆ¥ÅäµÄ¸ÃÓÃ»§µÄÈËÁ³ÌØÕ÷Öµ½øÐÐÊµÊ±±È¶Ô£¬ÒÔÅÐ¶Ï¸…	°²È«
ÓÃÓÚÐ¡¶î´û¿î¹«Ë¾µÄ¼à¹ÜÊý¾Ý²É¼¯ÏµÍ³¼°·½·¨	Îäºº½ðÈÚ×Ê²ú½»Ò×ËùÓÐÏÞ¹«Ë¾	2014-08-04	2014-10-22	CN104112228A	Ö÷·ÖÀàºÅ£ºG06Q40/00(2012.01)I	ÓÐÐ§-ÊÚÈ¨	430000 ºþ±±Ê¡ÎäººÊÐ¶«ºþ¿ª·¢ÇøÂ³ÏïÂÌ»¯¹ã³¡¶«ÄÏ²à	±¾·¢Ã÷¹«¿ªÁËÒ»ÖÖÓÃÓÚÐ¡¶î´û¿î¹«Ë¾µÄ¼à¹ÜÊý¾Ý²É¼¯ÏµÍ³¼°·½·¨£¬Éæ¼°¼à¹ÜÊý¾Ý²É¼¯ÁìÓò¡£¸ÃÏµÍ³°üÀ¨ÐÅÏ¢²É¼¯Ä£¿é¡¢Êý¾Ý°ü×éºÏÄ£¿é¡¢Êý¾Ý°ü¹ØÁªËã·¨Ä£¿é¡¢Êý¾Ý²É¼¯Ä£¿é¡¢Êý¾Ý°üÐ£ÑéÄ£¿éºÍÊý¾Ý°ü·ÖÀëÄ£¿é£»ÐÅÏ¢²É¼¯Ä£¿é¡¢Êý¾Ý°ü×éºÏÄ£¿éºÍÊý¾Ý°ü¹ØÁªËã·¨Ä£¿éË³´ÎÊ×Î²ÏàÁ¬£¬ÐÅÏ¢²É¼¯Ä£¿éÓëÊý¾Ý²É¼¯Ä£¿éÏàÁ¬£¬Êý¾Ý²É¼¯Ä£¿é¡¢Êý¾Ý°üÐ£ÑéÄ£¿éºÍÊý¾Ý°ü·ÖÀëÄ£¿éË³´ÎÊ×Î²ÏàÁ¬¡£±¾·¢Ã÷²»½ö¹¤×÷Ð§ÂÊ½Ï¸ß£¬ÄÜ¹»ÓÐÐ§·ÅÖÃ¶àÊý¾Ý°ü´«µÝÊ±Êý¾ÝÒÅÊ§£¬²…	½è´û
ÎÄµµ´òÓ¡µÄÖÕ¶Ë¼øÈ¨·½·¨ºÍÉè±¸	ÖÐ¹úÁªºÏÍøÂçÍ¨ÐÅ¼¯ÍÅÓÐÏÞ¹«Ë¾	2014-08-08	2014-11-19	CN104156646A	Ö÷·ÖÀàºÅ£ºG06F21/31(2013.01)I	Ê§Ð§-·¢Ã÷×¨ÀûÉêÇë¹«²¼ºóµÄ²µ»Ø	100033 ±±¾©ÊÐÎ÷³ÇÇø½ðÈÚ´ó½Ö21ºÅ	±¾·¢Ã÷Ìá¹©Ò»ÖÖÎÄµµ´òÓ¡µÄÖÕ¶Ë¼øÈ¨·½·¨ºÍÉè±¸£¬ÆäÖÐ£¬¸Ã·½·¨°üÀ¨£ºÍ¨¹ý´òÓ¡»úÏòÇëÇó´òÓ¡µÄÖÕ¶ËÉè±¸·¢ËÍ°üº¬²âÊÔÎÄ±¾µÄ¼øÈ¨ÏûÏ¢£¬ÆäÖÐ£¬ËùÊö²âÊÔÎÄ±¾µÄ¸ñÊ½ÐÅÏ¢ÖÐ°üº¬ËùÊö´òÓ¡»úËæ»úÉú³ÉµÄ²âÊÔÂë£¬ÖÕ¶ËÉè±¸´Ó²âÊÔÎÄ±¾µÄ¸ñÊ½ÐÅÏ¢ÖÐ»ñÈ¡ÑéÖ¤Âë£¬²¢·µ»Ø¸ø´òÓ¡»ú£¬Èô´òÓ¡»ú¸ù¾ÝËùÊö²âÊÔÂëºÍËùÊöÑéÖ¤ÂëÈ·¶¨ÖÕ¶ËÉè±¸¼øÈ¨Í¨¹ýºó·¢ËÍ´òÓ¡¾ÍÐ÷ÏìÓ¦¡£´Ó¶ø±ÜÃâÁËÏÖÓÐ¼¼ÊõÖÐ·Ç·¨ÖÕ¶Ë½ö½öÍ¨¹ýÃ°³ä°×Ãûµ¥¾ÍÄÜ¹»»ñÈ¡´òÓ¡ÊÚÈ¨µÄ·çÏÕ£¬Ìá¸ßÁË°²È«¹Ü¿…	°²È«
Ò»ÖÖ»ùÓÚÊ±¼äÍ¬²½µÄµç×ÓÇ®°üÏµÍ³µÄÖ§¸¶·½·¨	¼ÃÄÏÂüÎ¬ÐÅÏ¢¿Æ¼¼ÓÐÏÞ¹«Ë¾	2014-08-11	2014-11-05	CN104134141A	Ö÷·ÖÀàºÅ£ºG06Q20/36(2012.01)I	ÓÐÐ§-ÊÚÈ¨	250000 É½¶«Ê¡¼ÃÄÏÊÐ¸ßÐÂÇøÐÂÓîÂ·ÄÏÊ×ÆëÂ³Èí¼þÔ°´óÏÃÒ»²ã111ÊÒ	±¾·¢Ã÷µÄ»ùÓÚÊ±¼äÍ¬²½µÄµç×ÓÇ®°üÏµÍ³µÄÖ§¸¶·½·¨£¬µç×ÓÇ®°üÉèÖÃ°üÀ¨£ºa).Á¬½Ó²¢ÔËÐÐ³ÌÐò£»b).×Ö·ûÃÜÂëÉèÖÃ£»c).²úÉúÊ±¼äÍ¬²½ÖÖ×ÓÃÜÔ¿£»d).Ê±¼äÍ¬²½ÖÖ×ÓÃÜÔ¿¼ÓÃÜ£»e).×Ö·ûÃÜÂë¼ÓÃÜ£»f).Éú³ÉË½ÓÐÊý¾ÝÎÄ¼þ£»g).ÉèÖÃÍê³É£»Ö§¸¶¹ý³Ì°üÀ¨£º1).Éè±¸Á¬½Ó£»2).ÃÜÂëÊäÈë£»3).ÃÜÂëÐ£Ñé£»4).»ñÈ¡Ë½ÓÐÊý¾ÝÎÄ¼þ£»5).·¢Æð¸¶¿î£»6).²úÉú6Î»¶¯Ì¬Êý×Ö£»7).Ð£Ñé¶¯Ì¬Êý×Ö£»8).½âÃÜË½Ô¿£»9).×ªÕËÊÚÈ¨£»10).±£´æ×ªÕË¼ÇÂ¼£»11).Ö§¸¶Íê³É¡£±¾·¢Ã÷µÄÖ§¸¶·½·¨…	°²È«
Ò»ÖÖ»ùÓÚÖ¸ÎÆ¼ÓÃÜµÄµç×ÓÇ®°üÏµÍ³µÄÖ§¸¶·½·¨	¼ÃÄÏÂüÎ¬ÐÅÏ¢¿Æ¼¼ÓÐÏÞ¹«Ë¾	2014-08-11	2014-12-10	CN104200363A	Ö÷·ÖÀàºÅ£ºG06Q20/36(2012.01)I	ÓÐÐ§-ÊÚÈ¨	250000 É½¶«Ê¡¼ÃÄÏÊÐ¸ßÐÂÇøÐÂÓîÂ·ÄÏÊ×ÆëÂ³Èí¼þÔ°´óÏÃÒ»²ã111ÊÒ	±¾·¢Ã÷µÄ»ùÓÚÖ¸ÎÆ¼ÓÃÜµÄµç×ÓÇ®°üÏµÍ³µÄÖ§¸¶·½·¨£¬µç×ÓÇ®°üÉèÖÃ°üÀ¨£ºa).Á¬½ÓÉè±¸²¢ÔËÐÐ³ÌÐò£»b).×Ö·ûÃÜÂëÉèÖÃ£»c).Ö¸ÎÆÐÅÏ¢²É¼¯£»d).Ö¸ÎÆÐÅÏ¢¼ÓÃÜ£»e).×Ö·ûÃÜÂë¼ÓÃÜ£»f).Éú³ÉË½ÓÐÊý¾ÝÎÄ¼þ£»g).ÉèÖÃÍê³É£»µç×ÓÇ®°üÖ§¸¶°üÀ¨£º1).Éè±¸Á¬½Ó£¬½«USBÉÁ´æÅÌÓëPC»úÏàÁ¬½Ó£¬²¢ÔËÐÐUSBÉÁ´æÅÌÖÐµÄµç×ÓÇ®°üÓ¦ÓÃ³ÌÐò£¬½øÈë×ªÕËÁ÷³Ì£»2).ÃÜÂëÊäÈë£»3).ÃÜÂëÐ£Ñé£»4).»ñÈ¡Ë½ÓÐÊý¾ÝÎÄ¼þ£»5).·¢Æð¸¶¿î£»6).½âÃÜË½Ô¿£»7).×ªÕËÊÚÈ¨£»8).±£´æ×ªÕË¼ÇÂ¼£»…	°²È«
Ò»ÖÖ»ùÓÚÉùÎÆÌØÕ÷½øÐÐ°²È«ÈÏÖ¤µÄ·½·¨¼°Éè±¸	ÖÐÐËÍ¨Ñ¶¹É·ÝÓÐÏÞ¹«Ë¾	2014-08-20	2016-02-24	CN105357006A	Ö÷·ÖÀàºÅ£ºH04L9/32(2006.01)I	ÔÚÉó-ÊµÖÊÉó²éµÄÉúÐ§	518057 ¹ã¶«Ê¡ÉîÛÚÊÐÄÏÉ½Çø¸ßÐÂ¼¼Êõ²úÒµÔ°¿Æ¼¼ÄÏÂ·ÖÐÐËÍ¨Ñ¶´óÏÃ·¨Îñ²¿	±¾·¢Ã÷¹«¿ªÁËÒ»ÖÖ»ùÓÚÉùÎÆÌØÕ÷½øÐÐ°²È«ÈÏÖ¤µÄ·½·¨£¬¸Ã·½·¨°üÀ¨£ºÖÕ¶Ë½ÓÊÕµ½ÓïÒô²É¼¯Ö¸ÁîÊ±£¬²É¼¯ÓÃ»§Â¼ÈëµÄ´ý²âÓïÒôÊý¾Ý£»¶ÔËùÊö´ý²âÓïÒôÊý¾Ý½øÐÐÉùÎÆÌØÕ÷ÌáÈ¡£¬µÃµ½ÉùÎÆÌØÕ÷ÐÅÏ¢£»¸ù¾Ýµ±Ç°ÌáÈ¡µÄÉùÎÆÌØÕ÷ÐÅÏ¢ÓëÔ¤´æµÄÉùÎÆÌØÕ÷ÐÅÏ¢£¬¶Ôµ±Ç°ÓÃ»§µÄÉí·Ý½øÐÐÈÏÖ¤¡£±¾·¢Ã÷»¹Í¬Ê±¹«¿ªÁËÒ»ÖÖÖÕ¶Ë¡£	°²È«
ÒøÐÐ¿¨ºÍ¶¯Ì¬ÃÜÂë·¢ËÍ·½·¨	ËÕÖÝº£²©ÖÇÄÜÏµÍ³ÓÐÏÞ¹«Ë¾	2014-09-02	2016-03-30	CN105447548A	Ö÷·ÖÀàºÅ£ºG06K19/067(2006.01)I	ÔÚÉó-ÊµÖÊÉó²éµÄÉúÐ§	215200 ½­ËÕÊ¡ËÕÖÝÊÐÎâ½­Çø¾­¼Ã¿ª·¢ÇøÁªÑîÂ·ÒÔÄÏ£¬³¤°²Â·ÒÔ¶«£¨¿Æ¼¼´´ÒµÔ°£©	±¾·¢Ã÷Éæ¼°Ò»ÖÖÒøÐÐ¿¨ºÍ¶¯Ì¬ÃÜÂë·¢ËÍ·½·¨£¬¸ÃÒøÐÐ¿¨°üÀ¨£º´¦ÀíÆ÷¡¢´æ´¢Æ÷¡¢ÏÔÊ¾Æ÷¼þ¡¢·äÃùÆ÷¼þ¡¢°´¼üºÍµçÂ·°å£»µçÂ·°å·Ö±ðÁ¬½Ó´¦ÀíÆ÷¡¢´æ´¢Æ÷¡¢ÏÔÊ¾Æ÷¼þ¡¢·äÃùÆ÷¼þºÍ°´¼ü£»°´¼ü£¬ÓÃÓÚÏò´¦ÀíÆ÷·¢ËÍ°´¼üÐÅÏ¢£»´¦ÀíÆ÷£¬ÓÃÓÚ¸ù¾Ý°´¼üÐÅÏ¢Éú³É¶¯Ì¬ÃÜÂë£¬·¢ËÍ¸øÏÔÊ¾Æ÷¼þ£¬²¢´Ó´æ´¢Æ÷ÖÐ»ñÈ¡¶¯Ì¬ÃÜÂëËù¶ÔÓ¦µÄµÚÒ»ÉùÒôÐÅºÅ£¬·¢ËÍ¸ø·äÃùÆ÷¼þ£»ÏÔÊ¾Æ÷¼þ£¬ÓÃÓÚÏÔÊ¾¶¯Ì¬ÃÜÂë£»·äÃùÆ÷¼þ£¬ÓÃÓÚ½«µÚÒ»ÉùÒôÐÅºÅ½âÂë²¥·Å¡£ÓÉÉÏ¿É¼û£¬Í¨¹ýÊ¹ÓÃ±¾·¢Ã÷Ê…	°²È«
Ò»ÖÖÒÆ¶¯Ö§¸¶·½·¨¡¢ÏµÍ³¼°Éè±¸	ÖÐÐËÍ¨Ñ¶¹É·ÝÓÐÏÞ¹«Ë¾	2014-09-11	2016-03-23	CN105427105A	Ö÷·ÖÀàºÅ£ºG06Q20/40(2012.01)I	ÔÚÉó-ÊµÖÊÉó²éµÄÉúÐ§	518057 ¹ã¶«Ê¡ÉîÛÚÊÐÄÏÉ½Çø¸ßÐÂ¼¼Êõ²úÒµÔ°¿Æ¼¼ÄÏÂ·ÖÐÐËÍ¨Ñ¶´óÏÃ·¨Îñ²¿	±¾·¢Ã÷ÊµÊ©Àý¹«¿ªÁËÒ»ÖÖÒÆ¶¯Ö§¸¶·½·¨¡¢ÏµÍ³¼°Éè±¸£»ÆäÖÐ£¬ËùÊö·½·¨°üÀ¨£ºÒÆ¶¯ÖÕ¶Ë»ñÈ¡ÓÃ»§µÄÉúÎïÌØÕ÷Êý¾ÝºÍËùÊöÒÆ¶¯ÖÕ¶ËµÄÎ¨Ò»ÐÔÌØÕ÷Êý¾Ý£¬½«ËùÊöÓÃ»§µÄÉúÎïÌØÕ÷Êý¾ÝºÍËùÊöÎ¨Ò»ÐÔÌØÕ÷Êý¾Ý°´Ô¤Éè¹æÔòÉú³É¼ÓÃÜÊý¾Ý£¬½«ËùÊö¼ÓÃÜÊý¾Ý·¢ËÍÖÁÖ§¸¶Æ½Ì¨£»Ö§¸¶Æ½Ì¨½ÓÊÕ¼ÓÃÜÊý¾Ý£¬ÅÐ¶ÏËùÊö¼ÓÃÜÊý¾ÝÓë×ÔÉí´æ´¢µÄ±ê×¼¼ÓÃÜÊý¾ÝÄ£°åÊÇ·ñÆ¥Åä£¬»ñµÃÅÐ¶Ï½á¹û£»µ±ËùÊöÅÐ¶Ï½á¹ûÎªËùÊö¼ÓÃÜÊý¾ÝÓëËùÊö±ê×¼¼ÓÃÜÊý¾ÝÄ£°åÆ¥ÅäÊ±£¬ËùÊöÖ§¸¶Æ½Ì¨Íê³ÉÖ§¸¶´¦À…	Ö§¸¶
Ò»ÖÖÓïÒôÖ§¸¶ÈÏÖ¤·½·¨¼°ÏµÍ³	³¤É³ÊÐÃÎÂíÈí¼þÓÐÏÞ¹«Ë¾	2014-09-15	2014-12-10	CN104200366A	Ö÷·ÖÀàºÅ£ºG06Q20/40(2012.01)I	ÔÚÉó-ÊµÖÊÉó²éµÄÉúÐ§	410001 ºþÄÏÊ¡³¤É³ÊÐÜ½ÈØÖÐÂ·Èý¶Î495ºÅ³ÇÊÐ¿ìÏß1402ÊÒ	±¾·¢Ã÷¹«¿ªÁËÒ»ÖÖÓïÒôÖ§¸¶ÈÏÖ¤·½·¨¼°ÏµÍ³£¬ÓïÒô¿Ø¼þ»ñÈ¡ÓÃ»§µÄÓïÒôÐÅÏ¢£¬²¢½«¸ÃÓïÒôÐÅÏ¢´«µÝ¸øSEÓïÒôÈÏÖ¤Ä£¿é£»SEÓïÒôÈÏÖ¤Ä£¿é¸ù¾ÝÓÃ»§µÄÓïÒôÐÅÏ¢ÌáÈ¡ÓÃ»§µÄÉùÎÆÌØÕ÷£¬²¢¸ù¾Ý´æ´¢ÓÚSEÓïÒôÈÏÖ¤Ä£¿éµÄÓÃ»§ÉùÎÆÐÅÏ¢½øÐÐ±È¶ÔÈÏÖ¤£¬ÈôÈÏÖ¤Í¨¹ý£¬ÔòSEÓïÒôÈÏÖ¤Ä£¿éÉú³ÉÒ»¸öToken£¬²¢½«¸ÃToken·µ»Ø¸øÓïÒô¿Ø¼þ£»ÓïÒô¿Ø¼þ½«ËùÊöToken·µ»Ø¸øÖ§¸¶¿Í»§¶Ë£»Ö§¸¶¿Í»§¶ËÏòÖ§¸¶ÏµÍ³·¢ËÍÖ§¸¶ÇëÇó£»Ö§¸¶ÏµÍ³ÏòÍ³Ò»ÈÏÖ¤ÏµÍ³·¢ËÍÈÏÖ¤ÇëÇó£»Í³Ò»ÈÏÖ¤ÏµÍ³…	Ö§¸¶
»ùÓÚGPRSÎÞÏßÍøÂçµÄÒÆ¶¯ÊÛµçÊÕ·ÑÊÖ»úÖÕ¶ËÏµÍ³	¹ú¼ÒµçÍø¹«Ë¾	2014-09-16	2014-12-17	CN104217507A	Ö÷·ÖÀàºÅ£ºG07F19/00(2006.01)I	Ê§Ð§-·¢Ã÷×¨ÀûÉêÇë¹«²¼ºóµÄ²µ»Ø	100031 ±±¾©ÊÐÎ÷³ÇÇøÎ÷³¤°²½Ö86ºÅ	±¾·¢Ã÷Éæ¼°Ò»ÖÖ»ùÓÚGPRSÎÞÏßÍøÂçµÄÒÆ¶¯ÊÛµçÊÕ·ÑÊÖ»úÖÕ¶ËÏµÍ³£¬°üÀ¨GPRSÎÞÏßÍøÂç¡¢ÒøÁªÇ°ÖÃ»ú¡¢ÒøÁªÊý¾ÝÖÐÐÄ¡¢µçÁ¦Ç°ÖÃ»ú¼°µçÁ¦Êý¾ÝÖÐÐÄ£¬¸ÃÏµÍ³»¹°üÀ¨ÓÐÒÆ¶¯ÊÛµçÊÕ·ÑÊÖ»úÖÕ¶Ë£¬ËùÊöÒÆ¶¯ÊÛµçÊÕ·ÑÊÖ»úÖÕ¶ËÍ¨¹ýGPRSÎÞÏßÍøÂçÓëÒøÁªÇ°ÖÃ»úÏàÁ¬½Ó£¬ÒøÁªÇ°ÖÃ»úÍ¨¹ý×¨ÓÃÍøÂçÓëÒøÐÐÊý¾ÝÖÐÐÄ¼°µçÁ¦Ç°ÖÃ»úÏàÁ¬½Ó£¬µçÁ¦Ç°ÖÃ»úÓëµçÁ¦Êý¾ÝÖÐÐÄÏàÁ¬½Ó¡£±¾·¢Ã÷Éè¼ÆºÏÀí£¬ÓÐÐ§µØ½â¾öÁËµ±Ç°´æÔÚµÄ¹ºµçÍøµãÉÙÒÔ¼°Ö§¸¶ÊÖ¶Î²»·½±ãµÈÎÊÌâ£¬¾ßÓÐËæÊ±ËæµØ½…	Ö§¸¶
ÓïÒôÊ¶±ðÖÕ¶ËµÄÖ§¸¶·½·¨¼°ÏµÍ³	ÎÞÎýÖ¸ÍøÉúÎïÊ¶±ð¿Æ¼¼ÓÐÏÞ¹«Ë¾	2014-10-08	2015-03-04	CN104392353A	Ö÷·ÖÀàºÅ£ºG06Q20/40(2012.01)I	Ê§Ð§-·¢Ã÷×¨ÀûÉêÇë¹«²¼ºóµÄÊÓÎª³·»Ø	214101 ½­ËÕÊ¡ÎÞÎýÊÐÎýÉ½¾­¼Ã¿ª·¢Çø·ïÍþÂ·2ºÅËÑ¿ÍÌìµØ´óÏÃ101ÊÒ	±¾·¢Ã÷Éæ¼°Ò»ÖÖÓïÒôÊ¶±ðÖÕ¶ËµÄÖ§¸¶·½·¨¼°ÏµÍ³£¬°üÀ¨£ºÓïÒôÊ¶±ðÖÕ¶ËµÇÂ½Ö§¸¶·þÎñÆ÷²¢·¢ËÍÓÃ»§µÄÖ§¸¶ÇëÇó£»Ö§¸¶·þÎñÆ÷Éú³É¶¯Ì¬µÄÓïÒôÑéÖ¤ÐÅÏ¢²¢»Ø´«£»ÓïÒôÊ¶±ðÖÕ¶Ë²É¼¯ÓÃ»§¶Á³öµÄÓïÒôÑéÖ¤ÐÅÏ¢²¢´ÓÖÐÌáÈ¡ÓïÒôÑéÖ¤ÄÚÈÝºÍÉùÎÆÌØÕ÷£»Ö§¸¶¿Í»§¶Ë½«»ñÈ¡µÄÖ§¸¶ÐÅÏ¢¡¢ÓïÒôÑéÖ¤ÄÚÈÝºÍÉùÎÆÌØÕ÷·¢ËÍÖÁËùÊöÖ§¸¶·þÎñÆ÷£»Ö§¸¶·þÎñÆ÷ÑéÖ¤ÓïÒôÑéÖ¤ÄÚÈÝºÍÉùÎÆÌØÕ÷Í¨¹ýºó£¬¸ù¾ÝÓÃ»§µÄÖ§¸¶ÕËºÅºÍÖ§¸¶ÐÅÏ¢½øÐÐÖ§¸¶²Ù×÷¡£±¾·¢Ã÷µÄ¼¼Êõ·½°¸Í¨¹ýÉùÎÆÑéÖ¤Ê¶±…	°²È«
Ò»ÖÖPOS»ú°²È«Êý¾ÝµÄ±£»¤·½·¨ºÍÏµÍ³	ÉîÛÚÊÐÐÂ¹ú¶¼¼¼Êõ¹É·ÝÓÐÏÞ¹«Ë¾	2014-10-17	2015-02-18	CN104361695A	Ö÷·ÖÀàºÅ£ºG07G1/12(2006.01)I	Ê§Ð§-·¢Ã÷×¨ÀûÉêÇë¹«²¼ºóµÄ²µ»Ø	518040 ¹ã¶«Ê¡ÉîÛÚÊÐ¸£ÌïÇøÉîÄÏÂ·³µ¹«Ãí¹¤ÒµÇøÌ©È»¾¢ËÉ´óÏÃ17A	±¾·¢Ã÷¹«¿ªÁËPOS»ú°²È«Êý¾ÝµÄ±£»¤·½·¨ºÍÏµÍ³¡£·½·¨°üÀ¨²½Öè£ºS1£¬½«POS»úµÄ°²È«Êý¾Ý´æ´¢ÔÚÖÐÑë´¦ÀíÆ÷µÄÄÚ²¿´æ´¢Ä£¿éÖÐ£»S2£¬½«POS»ú°²È«Êý¾ÝµÄÔËËã·ÅÔÚÖÐÑë´¦ÀíÆ÷µÄÄÚ²¿ÔËËãÄ£¿éÖÐ½øÐÐ¡£ÏµÍ³°üÀ¨ÖÐÑë´¦ÀíÆ÷£¬ËùÊöÖÐÑë´¦ÀíÆ÷°üÀ¨ÓÃÓÚ´æ´¢POS»ú°²È«Êý¾ÝµÄÄÚ²¿´æ´¢Ä£¿éºÍÓÃÓÚ¶ÔPOS»ú°²È«Êý¾Ý½øÐÐÔËËãµÄÄÚ²¿ÔËËãÄ£¿é¡£±¾·¢Ã÷½«POS»úÊ¹ÓÃ¹ý³ÌÖÐµÄ°²È«Êý¾Ý¼°°²È«Êý¾ÝµÄÔËËã¶¼·ÅÔÚÖÐÑë´¦ÀíÆ÷ÄÚ²¿½øÐÐ£¬±ÜÃâ°²È«Êý¾ÝµÄ´æ´¢ºÍÔËÐÐÔÚÖÐÑë´¦À…	°²È«
½ðÈÚÖÇÄÜ¿¨ÉÏÊµÏÖÉí·ÝÈÏÖ¤µÄ·½·¨¡¢½ðÈÚÖÇÄÜ¿¨ºÍÖÕ¶Ë	±±¾©´óÌÆÖÇÄÜ¿¨¼¼ÊõÓÐÏÞ¹«Ë¾	2014-11-05	2015-01-28	CN104320261A	Ö÷·ÖÀàºÅ£ºH04L9/32(2006.01)I	ÓÐÐ§-ÊÚÈ¨	100094 ±±¾©ÊÐº£µíÇøÓÀ¼Î±±Â·6ºÅ	±¾·¢Ã÷¹«¿ªÁËÒ»ÖÖ½ðÈÚÖÇÄÜ¿¨ÉÏÊµÏÖÉí·ÝÈÏÖ¤¹¦ÄÜµÄ·½·¨£¬°üÀ¨£ºÍ¨¹ýÖÇÄÜ¿¨¶ÁÐ´½Ó¿ÚÓëÖÕ¶Ë½¨Á¢Í¨ÐÅÁ¬½Ó£»½ÓÊÕËùÊöÖÕ¶Ë·¢ËÍµÄ¼øÈ¨ÐÅÏ¢£¬¸ù¾ÝËùÊö¼øÈ¨ÐÅÏ¢ÅÐ¶ÏÖÕ¶ËÓÃ»§ÊÇ·ñÎªºÏ·¨µÄÖÕ¶ËÓÃ»§£¬ÏòËùÊöÖÕ¶Ë·µ»Ø¼øÈ¨ÏìÓ¦£»½ÓÊÕºÏ·¨µÄÖÕ¶ËÓÃ»§·¢ËÍµÄÐÅÏ¢Ô­ÎÄ²¢½øÐÐÊý×ÖÇ©Ãû£¬¶ÔËùÊöÐÅÏ¢Ô­ÎÄºÍÊý×ÖÇ©Ãû½øÐÐ¼ÓÃÜµÃµ½ÐÅÏ¢ÃÜÎÄ£¬½«ËùÊöÐÅÏ¢ÃÜÎÄ·µ»Ø¸øÖÕ¶Ë¡£±¾·¢Ã÷ÄÜ¹»Í¨¹ý¾ßÓÐÉí·ÝÈÏÖ¤¹¦ÄÜµÄ½ðÈÚÖÇÄÜ¿¨¸¨ÖúÒÆ¶¯ÖÕ¶ËÓÃ»§ÔÚÊ¹ÓÃ»¥ÁªÍø½ðÈÚÒµÎñÊ±Í…	°²È«
Ò»ÖÖ½ðÈÚIC¿¨¼°»ùÓÚ¸Ã¿¨µÄÃÜÂëÊäÈë·½·¨ºÍ×°ÖÃ	ÖÐ¹ú½¨ÉèÒøÐÐ¹É·ÝÓÐÏÞ¹«Ë¾	2014-11-13	2015-01-28	CN104318143A	Ö÷·ÖÀàºÅ£ºG06F21/31(2013.01)I	ÔÚÉó-ÊµÖÊÉó²éµÄÉúÐ§	100033 ±±¾©ÊÐÎ÷³ÇÇø½ðÈÚ´ó½Ö25ºÅ	±¾ÉêÇëÌá¹©Ò»ÖÖ½ðÈÚIC¿¨¼°¾ßÓÐ¸Ã¿¨µÄÃÜÂëÊäÈë·½·¨ºÍ×°ÖÃ£¬ÆäÖÐ£¬¸Ã½ðÈÚIC¿¨°üÀ¨£º±¾Ìå¡¢ÖÁÓÚ±¾ÌåÄÚµÄIC¿¨Ð¾Æ¬¼°ÏßÈ¦¡¢¼ÓÃÜÐ¾Æ¬¡¢Éù²¨·¢ÉäÆ÷¡¢Ó²¼ÓÃÜÃÜÂë¼üÅÌ¼°Ö½Æ¬µç³Ø¡£ÔÚ¾ßÌåÃÜÂëÊäÈë¹ý³ÌÖÐ£º½ÓÊÕÓÃ»§Í¨¹ýÓ²¼ÓÃÜÃÜÂë¼üÅÌÊäÈëµÄÃÜÂëÊý¾Ý£¬ÓÉÓ²¼ÓÃÜÃÜÂë¼üÅÌ¶Ô¸ÃÃÜÂëÊý¾Ý½øÐÐÓ²¼ÓÃÜ£¬²¢½«¾­¹ýÓ²¼ÓÃÜºóµÄÃÜÂëÊý¾ÝÍ¨¹ýÏßÈ¦/Éù²¨·¢ÉäÆ÷ÏòÖÕ¶ËÉè±¸´«ËÍ£¬ÒÔÊ¹µÃÖÕ¶ËÉè±¸½«¾­¹ýÓ²¼ÓÃÜºóµÄÃÜÂëÊý¾Ý·¢ËÍ¸ø·þÎñÆ÷½øÐÐÑéÖ¤£¬½ø¶øÊ¹µÃÍ¨¹ýÓÃ»§…	°²È«
ÒÆ¶¯ÖÕ¶ËÖ§¸¶½çÃæ±£»¤·½·¨¼°×°ÖÃ	±±¾©Ææ»¢¿Æ¼¼ÓÐÏÞ¹«Ë¾	2014-11-21	2015-02-25	CN104376274A	Ö÷·ÖÀàºÅ£ºG06F21/62(2013.01)I	ÓÐÐ§-ÊÚÈ¨	100088 ±±¾©ÊÐÎ÷³ÇÇøÐÂ½Ö¿ÚÍâ´ó½Ö28ºÅD×ù112ÊÒ£¨µÂÊ¤Ô°Çø£©	±¾·¢Ã÷¹«¿ªÒ»ÖÖÒÆ¶¯ÖÕ¶ËÖ§¸¶½çÃæ±£»¤·½·¨£¬Æä°üÀ¨ÒÔÏÂ²½Öè£º²¶»ñ¾ß±¸Ö§¸¶¹¦ÄÜµÄ¿Í»§¶ËµÄ½çÃæÐÅÏ¢£¬Ê¶±ðÆäÖÐµÄÖ§¸¶½çÃæ£»µ±ËùÊö¿Í»§¶ËµÄÖ§¸¶½çÃæ±»µ÷ÓÃÊ±£¬¼¤»îÏÔÊ¾ÃÜÂëÑéÖ¤½çÃæ£¬Ê¹ËùÊöÖ§¸¶½çÃæ´¦ÓÚ·Ç¼¤»î×´Ì¬£»Í¨¹ýÃÜÂëÑéÖ¤½çÃæ½ÓÊÕÃÜÂëÊäÈë£¬ÔÚÑéÖ¤ËùÊäÈëµÄÃÜÂëÕýÈ·Ö®ºó£¬¼¤»îËùÊöÖ§¸¶½çÃæ¡£»¹¹«¿ªÒ»ÖÖ¿ÉÊµÊ©ËùÊö·½·¨µÄÒÆ¶¯ÖÕ¶ËÖ§¸¶½çÃæ±£»¤×°ÖÃ¡£±¾·¢Ã÷µÄ·½·¨¼°×°ÖÃ½«Ö§¸¶³¡¾°µÄÊ¶±ð¾ßÌåµ½Æä»î¶¯½çÃæ£¬Ò²¼´¶ÔÓ¦µ½Æä»î¶¯×é¼þ£¬Ô…	Ö§¸¶
Ò»ÖÖÖ¸ÎÆÈÏÖ¤·½·¨¼°ÏµÍ³¡¢Ö¸ÎÆÄ£°å¼ÓÃÜ×°ÖÃ	±±¾©´óÌÆÖÇÄÜ¿¨¼¼ÊõÓÐÏÞ¹«Ë¾	2014-11-28	2015-03-11	CN104408356A	Ö÷·ÖÀàºÅ£ºG06F21/32(2013.01)I	ÓÐÐ§-ÊÚÈ¨	100094 ±±¾©ÊÐº£µíÇøÓÀ¼Î±±Â·6ºÅ	±¾·¢Ã÷¹«¿ªÁËÒ»ÖÖÖ¸ÎÆÈÏÖ¤·½·¨¼°ÏµÍ³¡¢Ö¸ÎÆÄ£°å¼ÓÃÜ×°ÖÃ£¬°üÀ¨£ºÖÇÄÜ¿¨½«ºóÌ¨ÏµÍ³·¢ËÍµÄÖ¸ÎÆÌØÕ÷Êý¾Ý½øÐÐ´¦ÀíÉú³ÉÃÜÎÄÄ£°å£»µ±POS»úÑéÖ¤ÖÇÄÜ¿¨µÄÉí·ÝÈÏÖ¤ÂëºÏ·¨Ê±£¬POS»ú¸ù¾Ý»ñµÃµÄÖÇÄÜ¿¨µÄÉí·ÝÈÏÖ¤Âë»ñÈ¡ËùÊöÖÇÄÜ¿¨µÄÐ¾Æ¬ÐòÁÐºÅ£»POS»ú¸ù¾Ý»ñµÃµÄËùÊöÖÇÄÜ¿¨µÄÐ¾Æ¬ÐòÁÐºÅÓëÖÇÄÜ¿¨½øÐÐË«ÏòÈÏÖ¤£»Ë«ÏòÈÏÖ¤Í¨¹ýºó£¬POS»ú²É¼¯³Ö¿¨ÈËµÄÖ¸ÎÆÌØÕ÷Êý¾Ý£»¶Ô²É¼¯µÄÖ¸ÎÆÌØÕ÷Êý¾Ý½øÐÐ¼ÓÈÅºó·¢ËÍ¸øÖÇÄÜ¿¨£»ÖÇÄÜ¿¨¶Ô½ÓÊÕµ½µÄ¼ÓÈÅºóµÄÖ¸ÎÆÌØÕ÷Êý¾…	°²È«
Ò»ÖÖ°²È«´òÓ¡¹ÜÀíµÄ·½·¨¼°ÏµÍ³	±±¾©º£Ì©·½Ô²¿Æ¼¼ÓÐÏÞ¹«Ë¾	2014-12-10	2015-03-25	CN104462901A	Ö÷·ÖÀàºÅ£ºG06F21/31(2013.01)I	Ê§Ð§-·¢Ã÷×¨ÀûÉêÇë¹«²¼ºóµÄ²µ»Ø	100094 ±±¾©ÊÐº£µíÇø¶«±±ÍúÎ÷Â·8ºÅÖÐ¹Ø´åÈí¼þÔ°9ºÅÂ¥¹ú¼ÊÈí¼þ´óÏÃE×ùÒ»²ã¡¢¶þ²ã	±¾·¢Ã÷ËùÌá¹©µÄÒ»ÖÖ°²È«´òÓ¡¹ÜÀíµÄ·½·¨£¬°üÀ¨£ºA.¼ÆËã»ú¶Ô²Ù×÷¼ÆËã»úµÄÓÃ»§½øÐÐÉí·ÝÈÏÖ¤£»B.¼ÆËã»ú½«ËùÊöÓÃ»§µÄÉí·ÝÈÏÖ¤ÐÅÏ¢ºÍÓÃ»§Í¨¹ý¼ÆËã»úËùÌá½»µÄ´òÓ¡Êý¾ÝÉÏ´«ÖÁ·þÎñÆ÷»º´æ£»C.´òÓ¡»ú¿ØÖÆÆ÷¶Ô²Ù×÷´òÓ¡¿ØÖÆÆ÷µÄÓÃ»§Éí·ÝÌØÕ÷½øÐÐ²É¼¯£¬ÉÏ´«ÖÁ·þÎñÆ÷£»D.·þÎñÆ÷¸ù¾ÝÔ¤ÏÈ´æ´¢µÄÓÃ»§Éí·ÝÈÏÖ¤ÐÅÏ¢ÓëÉí·ÝÌØÕ÷ÐÅÏ¢µÄÆ¥Åä¹ØÏµ£¬È·¶¨²Ù×÷´òÓ¡¿ØÖÆÆ÷ÓÃ»§µÄÉí·ÝÈÏÖ¤ÐÅÏ¢£¬´Ó¶øÈ·¶¨³öËù»º´æµÄÆäÒª´òÓ¡µÄÊý¾Ý£¬½«ËùÈ·¶¨³öµÄÊý¾Ý·¢ËÍÖÁËùÊö´òÓ…	°²È«
Ò»ÖÖÒøÐÐÏµÍ³µÄÊÖÖ¸¾²ÂöÊ¶±ðÖÕ¶Ë¼°ÆäÍ¼Ïñ´¦Àí·½·¨	Ìì½òÊÐ¸ßÁ¦µçÆø¿Æ¼¼ÓÐÏÞ¹«Ë¾	2014-12-16	2016-07-20	CN105787414A	Ö÷·ÖÀàºÅ£ºG06K9/00(2006.01)I	ÔÚÉó-ÊµÖÊÉó²éµÄÉúÐ§	300180 Ìì½òÊÐºÓ¶«Çø¶þºÅÇÅµç´«Â·7ºÅÔºA×ù120-122ÊÒ	±¾·¢Ã÷Éæ¼°Ò»ÖÖÒøÐÐÏµÍ³µÄÊÖÖ¸¾²ÂöÊ¶±ðÖÕ¶Ë¼°ÆäÍ¼Ïñ´¦Àí·½·¨£¬°üÀ¨¿ÇÌå¡¢ºìÍâÏßLEDµÆ¡¢´¦ÀíÆ÷Ð¾Æ¬¡¢¼°CCDÉãÏñ»ú£¬ÔÚ¿ÇÌåÉÏÖÆÓÐÊÖÖ¸µ¼Ïò²Û£¬ÔÚÊÖÖ¸µ¼Ïò²ÛÉÏ·½µÄ¿ÇÌåÉÏ°²×°½üºìÍâÏßLEDµÆ£¬ÔÚÊÖÖ¸µ¼Ïò²ÛµÄµ×²¿°²×°ÊÖÖ¸´¥°å£¬¸ÃÊÖÖ¸´¥°åÁ¬½ÓÒ»Í¼Ïñ²É¼¯¿¨£¬ÔÚÕý¶ÔÊÖÖ¸´¥°åÏÂ·½µÄ¿ÇÌåÄÚ°²×°CCDÉãÏñ»ú£¬ËùÊöCCDÉãÏñ»ú¡¢Í¼Ïñ²É¼¯¿¨¾ùÓë°²×°ÔÚ¿ÇÌåÄÚµÄ´¦ÀíÆ÷Ð¾Æ¬Á¬½Ó£¬ÔÚ¿ÇÌåµÄ²à±ÚÉÏÖÆÓÐUSBÍ¨Ñ¶½Ó¿Ú£¬ÔÚ¿ÇÌåµÄºó±ÚÖÆÓÐµçÔ´ÊÊÅäÆ÷½Ó¿Ú¡£±¾Ê…	°²È«
Ò»ÖÖ°²È«ÊäÃÜÂëµÄ·½·¨¼°POS»ú	¸£½¨ÁªµÏÉÌÓÃÉè±¸ÓÐÏÞ¹«Ë¾	2014-12-18	2015-03-25	CN104464124A	Ö÷·ÖÀàºÅ£ºG07G1/12(2006.01)I	ÓÐÐ§-ÊÚÈ¨	350003 ¸£½¨Ê¡¸£ÖÝÊÐÈí¼þ´óµÀ89ºÅ¸£ÖÝÈí¼þÔ°Ò»Çø23ºÅÂ¥	±¾·¢Ã÷Ìá¹©Ò»ÖÖ°²È«ÊäÃÜÂëµÄ·½·¨¼°POS»ú£¬·½·¨°üÀ¨ÔÚPOS»úÃÜÂë¼üÅÌÇøÓòÉèÖÃÁ½¸öÒÔÉÏµÄºìÍâ¾àÀë´«¸ÐÆ÷£»Ô¤Éè¸ÐÓ¦¾àÀë£»POS»ú¶ÁÈ¡´Å¿¨ÐÅÏ¢£»´¥·¢POS»úÃÜÂë¼üÅÌÉÏµÄºìÍâ¾àÀë´«¸ÐÆ÷£»ÈôºìÍâ¾àÀë´«¸ÐÆ÷ÔÚÔ¤Éè¸ÐÓ¦¾àÀëÄÚ½ÓÊÕµ½¸ÐÓ¦ÐÅºÅ£¬Ôò·¢ËÍ¸ÐÓ¦ÐÅÏ¢ÖÁPOS»úµÄ¿ØÖÆµ¥Ôª£»POS»úµÄ¿ØÖÆµ¥ÔªÅÐ¶ÏÊÇ·ñ½ÓÊÕµ½ËùÓÐºìÍâ¾àÀë´«¸ÐÆ÷µÄËùÊö¸ÐÓ¦ÐÅÏ¢£»ÈôÊÇ£¬ÔòÇÐ»»ÖÁÃÜÂëÊäÈë½çÃæ£»Èô·ñ£¬ÔòÇÐ»»ÖÁÌáÊ¾×´Ì¬¡£²»½öÄÜ¹»±£Ö¤ÔÚ½øÈëÊäÃÜÂë½çÃæÇ°ÓÃ»§¶ÔÃ…	°²È«
Ò»ÖÖ·ÀÍµ¿úÃÜÂëÊäÈë·½Ê½	Ê©ºÀ½Ü	2014-12-19	2016-07-13	CN105760793A	Ö÷·ÖÀàºÅ£ºG06F21/83(2013.01)I	ÔÚÉó-ÊµÖÊÉó²éµÄÉúÐ§	226133 ½­ËÕÊ¡ÄÏÍ¨ÊÐÁÙ½­Õò½­Ð£´å10×é	±¾·¢Ã÷ÎªÒ»ÖÖ·ÀÍµ¿úÃÜÂëÊäÈë·½Ê½£¬Éæ¼°ÐÅÏ¢¼¼ÊõÁìÓò£¬ÌØ±ðÊÊÓÃÓÚÈÕ³£Éú»îÖÐÐèÒª½øÐÐÃÜÂëÊäÈëµÄ³¡ºÏ¡£±¾·¢Ã÷²ÉÓÃ¿ÉËæ»ú¸Ä±ä×Ö·û¼üÎ»¼¼ÊõºÍ¶¨ÏòÏÔÊ¾¼¼ÊõÏà½áºÏµÄ·½Ê½À´ÊµÏÖ¹«ÖÚºÏ³¡ÃÜÂëÊäÈëÊ±µÄ·ÀÍµ¿ú×÷ÓÃ¡£¶¨ÏòÏÔÊ¾¼¼ÊõÊ¹ÃÜÂëÊäÈëÕßÒÔÍâµÄÈË¿´²»µ½¼üÅÌÏÔÊ¾µÄ×Ö·ûÄÚÈÝ£¬Í¬Ê±²ÉÓÃ×Ö·û¼üÎ»Ëæ»ú¸Ä±äµÄ·½Ê½ºó£¬Ê¹ÃÜÂëÊäÈëÕßÒÔÍâµÄÈË¼´Ê¹ÄÜ¿´µ½ÃÜÂëÊäÈëÕßµÄ°´¼ü¶¯×÷£¬Ò²ÎÞ·¨ÅÐ¶ÏÆäÊäÈëµÄÊÇÊ²Ã´×Ö·û¡£ÕâÑù£¬¾Í¿ÉÒÔ´ïµ½ÔÚ¹«ÖÚ³¡ºÏÊäÈëÃÜÂëÊ…	°²È«
Ò»ÖÖ¶ÀÁ¢Éú³ÉºÍ±£´æ¼ÓÃÜÊý×Ö»õ±ÒË½Ô¿µÄ·½·¨¼°³ÐÔØ¼ÓÃÜÊý×Ö»õ±ÒË½Ô¿µÄ×°ÖÃ	±ÈÌØ¿¨¹ú¼ÊÓÐÏÞ¹«Ë¾	2014-12-19	2015-03-25	CN104463001A	Ö÷·ÖÀàºÅ£ºG06F21/60(2013.01)I	Ê§Ð§-·¢Ã÷×¨ÀûÉêÇë¹«²¼ºóµÄ²µ»Ø	ÖÐ¹úÏã¸Û¹ÛÌÁ¿ªÔ´µÀ55ºÅ¿ªÁª¹¤ÒµÖÐÐÄB×ù10Â¥04ÊÒ	±¾·¢Ã÷Ìá¹©ÁËÒ»ÖÖ¶ÀÁ¢Éú³ÉºÍ±£´æ¼ÓÃÜÊý×Ö»õ±ÒË½Ô¿µÄ·½·¨£¬°üÀ¨ÒÔÏÂ²½Öè£¬Ë½Ô¿Éú³É:²ÉÓÃÒ»¸öÖÇÄÜ×°ÖÃ£¬¸ÃÖÇÄÜ×°ÖÃ´ÓÄÚ²¿²úÉúË½Ô¿£»Ë½Ô¿±£´æ:½«Ë½Ô¿´¢´æÓÚÖÇÄÜ×°ÖÃÄÚ£¬Ë½Ô¿ÍêÈ«·â±ÕÔÚÖÇÄÜ×°ÖÃÄÚ²¿£¬Íâ²¿ÎÞ·¨¶ÁÈ¡£»Ë½Ô¿Ê¹ÓÃ:ÖÇÄÜ×°ÖÃ¾ßÓÐÓëÁ¬½ÓÔÚ»¥ÁªÍøÉÏµÄÖÇÄÜÖÕ¶ËµÄÍ¨ÐÅ½Ó¿Ú£¬Í¨¹ýÍ¨ÐÅ½Ó¿ÚÓëÖÇÄÜÖÕ¶Ë½»»¥¿ª·ÅÐÅÏ¢¡£±¾·¢Ã÷½«½«Ë½Ô¿°þÀë³öÇ®°ü£¬µ¥¶À·â´æÔÚÖÇÄÜ×°ÖÃÄÚ£¬ÖÇÄÜ×°ÖÃ¶ÔÍâÖ»ÓÐ¹«Ô¿ºÍµç×ÓÇ©ÃûÐÅÏ¢£¬¶Å¾øÈÎºÎ·Ç±¾ÈËÒâÔ¸¶ø±»µÁ…	°²È«
Ò»ÖÖÓÃÓÚ³®Æ±´æ´¢Êý¾ÝµÄ°²È«´«Êä·½·¨¼°×°ÖÃ	ÖÐ¹úÓ¡³®Ôì±Ò×Ü¹«Ë¾	2014-12-19	2015-05-20	CN104636681A	Ö÷·ÖÀàºÅ£ºG06F21/62(2013.01)I	ÔÚÉó-×¨ÀûÉêÇëÈ¨¡¢×¨ÀûÈ¨µÄ×ªÒÆ	100044 ±±¾©ÊÐÎ÷³ÇÇøÎ÷Ö±ÃÅÍâ´ó½Ö¼×143ºÅ	±¾·¢Ã÷¹«¿ªÁËÒ»ÖÖÓÃÓÚ³®Æ±´æ´¢Êý¾ÝµÄ°²È«´«Êä·½·¨¼°×°ÖÃ£¬Éæ¼°³®´¢ÎïÁ÷¹ÜÀíÖ®ÌØÖÖÓ¦ÓÃÁìÓò¡£ËùÊö·½·¨°üÀ¨£ºÒµÎñÏµÍ³»ò¶ÁÈ¡ÔË³®´üµç×ÓÇ©·âÊý¾ÝµÄÊÖ³ÖÖÕ¶ËÔÚ¼ì²âµ½¶Ô·½ÓëÆä½øÐÐÎÞÏßUSBÁ¬½ÓÊ±£¬Æô¶¯²¢Ö´ÐÐË«ÏòÈÏÖ¤£»ËùÊöÒµÎñÏµÍ³»òËùÊöÊÖ³ÖÖÕ¶Ë¸ù¾ÝË«ÏòÈÏÖ¤Ê§°ÜµÄ½á¹û£¬¾Ü¾øÏò¶Ô·½´«Êä£»ËùÊöÒµÎñÏµÍ³»òËùÊöÊÖ³ÖÖÕ¶Ë¸ù¾ÝË«ÏòÈÏÖ¤³É¹¦µÄ½á¹û£¬Æô¶¯¼ÓÃÜÊý¾Ý´«Êä¹¦ÄÜ£»ÔÚËùÊöÒµÎñÏµÍ³»òËùÊöÊÖ³ÖÖÕ¶ËÆô¶¯¼ÓÃÜÊý¾Ý´«Êä¹¦ÄÜºó£¬¸ù¾Ý¶Ô·½´«ËÍ…	°²È«
»ùÓÚºçÄ¤Ê¶±ð¼¼ÊõµÄÒÆ¶¯Ö§¸¶ÏµÍ³	ËÕÖÝ¸£·á¿Æ¼¼ÓÐÏÞ¹«Ë¾	2014-12-25	2015-05-06	CN104599118A	Ö÷·ÖÀàºÅ£ºG06Q20/32(2012.01)I	Ê§Ð§-·¢Ã÷×¨ÀûÉêÇë¹«²¼ºóµÄ²µ»Ø	210511 ½­ËÕÊ¡ËÕÖÝÊÐ¸ßÐÂ¼¼Êõ²úÒµ¿ª·¢Çø¿Æ¼¼³ÇÅàÔ´Â·2ºÅ£¨Î¢ÏµÍ³Ô°M2-4²ã£©	±¾·¢Ã÷¹«¿ªÁËÒ»ÖÖ»ùÓÚºçÄ¤Ê¶±ð¼¼ÊõµÄÒÆ¶¯Ö§¸¶ÏµÍ³£¬°üÀ¨ÒÆ¶¯Ö§¸¶×°ÖÃ£¬ËùÊöÒÆ¶¯Ö§¸¶×°ÖÃÖÐÉèÖÃÓÐºçÄ¤Í¼Ïñ²É¼¯Ä£¿é¡¢ºçÄ¤Í¼ÏñÔ¤´¦ÀíÄ£¿é¡¢ºçÄ¤Êý¾Ý¿âÄ£¿é¡¢ºçÄ¤Ê¶±ðÈ·ÈÏÄ£¿é¡¢Ö§¸¶µ¥ÔªºÍ¿ØÖÆµ¥Ôª£¬ËùÊöºçÄ¤Í¼Ïñ²É¼¯Ä£¿é¡¢ºçÄ¤Í¼ÏñÔ¤´¦ÀíÄ£¿é¡¢ºçÄ¤Êý¾Ý¿âÄ£¿é¡¢ºçÄ¤Ê¶±ðÈ·ÈÏÄ£¿éÒÀ´ÎÁ¬½Ó£¬ºçÄ¤Ê¶±ðÈ·ÈÏÄ£¿é¡¢Ö§¸¶µ¥Ôª¾ùÓë¿ØÖÆµ¥ÔªÏàÁ¬½Ó£»ËùÊöÖ§¸¶µ¥Ôª£¬´æ´¢Ö§¸¶ÕË»§ÐÅÏ¢£¬½øÐÐ½ü¾àÀëÖ§¸¶¡£²ÉÓÃ»ùÓÚºçÄ¤Ê¶±ð¼¼ÊõºÍ¿ØÖÆµ¥Ôª£¬Í¬Ê±±¨¾…	Ö§¸¶
Ò»ÖÖÖ§¸¶·½·¨¡¢×°ÖÃ¼°ÖÕ¶Ë	ÓîÁú¼ÆËã»úÍ¨ÐÅ¿Æ¼¼£¨ÉîÛÚ£©ÓÐÏÞ¹«Ë¾	2014-12-29	2015-04-29	CN104574086A	Ö÷·ÖÀàºÅ£ºG06Q20/40(2012.01)I	ÔÚÉó-ÊµÖÊÉó²éµÄÉúÐ§	518057 ¹ã¶«Ê¡ÉîÛÚÊÐÄÏÉ½Çø¸ßÐÂ¼¼Êõ¹¤ÒµÔ°±±Çø¿áÅÉÐÅÏ¢¸Û1¶°6²ã	±¾·¢Ã÷¹«¿ªÁËÒ»ÖÖÖ§¸¶·½·¨¡¢×°ÖÃ¼°ÖÕ¶Ë£¬°üÀ¨£ºÔÚ½øÐÐÒÆ¶¯Ö§¸¶Ê±£¬²É¼¯Ö§¸¶ÓÃ»§µÄÉúÎïÌØÕ÷ÐÅÏ¢£»µ±²É¼¯µÄÖ§¸¶ÓÃ»§µÄÉúÎïÌØÕ÷ÐÅÏ¢ÓëÔ¤ÏÈ´æ´¢µÄ°²È«ÓÃ»§µÄÉúÎïÌØÕ÷ÐÅÏ¢Æ¥ÅäÊ±£¬ÔÊÐíÖ§¸¶¡£±¾·¢Ã÷Í¨¹ý½«ÓÃ»§µÄÉúÎïÌØÕ÷ÐÅÏ¢×÷ÎªÖ§¸¶ÑéÖ¤ÐÅÏ¢£¬µ±Í¨¹ýÑéÖ¤ºó²Å½øÐÐÖ§¸¶£¬ÓÐÐ§µØÌá¸ßÁËÖ§¸¶µÄ°²È«ÐÔ¡£	°²È«
ÐÅÏ¢°²È«±£»¤×°ÖÃ¼°·½·¨	¸»Ì©»ª¹¤Òµ£¨ÉîÛÚ£©ÓÐÏÞ¹«Ë¾	2014-12-31	2016-07-27	CN105809013A	Ö÷·ÖÀàºÅ£ºG06F21/34(2013.01)I	Ê§Ð§-·¢Ã÷×¨ÀûÉêÇë¹«²¼ºóµÄÊÓÎª³·»Ø	518109 ¹ã¶«Ê¡ÉîÛÚÊÐ±¦°²Çø¹ÛÀ½½ÖµÀ´óÈýÉçÇø¸»Ê¿¿µ¹ÛÀ½¿Æ¼¼Ô°BÇø³§·¿4¶°¡¢6¶°¡¢7¶°¡¢13¶°£¨I¶Î£©	±¾·¢Ã÷Ìá¹©Ò»ÖÖÐÅÏ¢°²È«±£»¤×°ÖÃ¼°·½·¨¡£¸ÃÐÅÏ¢°²È«±£»¤·½·¨Ó¦ÓÃÓÚ½ðÈÚ¿¨µÄÐÅÏ¢°²È«±£»¤×°ÖÃÖÐ£¬¸ÃÐÅÏ¢°²È«±£»¤×°ÖÃ°üÀ¨´æ´¢µ¥Ôª¡¢¶¨Î»µ¥Ôª¡¢Í¨ÐÅµ¥Ôª£¬¸Ã´æ´¢µ¥ÔªÖÐ´æ´¢ÓÃ»§µÄÕæÊµÕË»§ºÍ±¸ÓÃÕË»§£¬¸ÃÕæÊµÕË»§¶ÔÓ¦Ò»ÕæÊµÃÜÂë£¬¸Ã±¸ÓÃÕË»§¶ÔÓ¦±¨¾¯ÃÜÂë£¬ÆäÖÐ¸ÃÕæÊµÃÜÂëÓë¸Ã±¨¾¯ÃÜÂë²»Í¬¡£¸Ã·½·¨°üÀ¨£ºÔÚ½ðÈÚ¿¨±»ÔÚ×Ô¶¯¹ñÔ±»úµÈ½ðÈÚÉè±¸ÖÐÊ¹ÓÃÊ±£¬Õì²âÓÃ»§Í¨¹ý½ðÈÚÉè±¸ÉÏµÄÃÜÂëÊäÈë×°ÖÃÊäÈëµÄÃÜÂëÊÇ·ñÓë±¨¾¯ÃÜÂëÏàÍ¬£»ÒÔ¼°ÈôÓÃ»§ÊäÈ…	°²È«
Ò»ÖÖÖ¸ÎÆÈÏÖ¤·½·¨ºÍ×°ÖÃ	°Ù¶ÈÔÚÏßÍøÂç¼¼Êõ£¨±±¾©£©ÓÐÏÞ¹«Ë¾	2015-01-08	2015-05-06	CN104598793A	Ö÷·ÖÀàºÅ£ºG06F21/32(2013.01)I	Ê§Ð§-·¢Ã÷×¨ÀûÉêÇë¹«²¼ºóµÄ²µ»Ø	100085 ±±¾©ÊÐº£µíÇøÉÏµØÊ®½Ö10ºÅ°Ù¶È´óÏÃ	±¾·¢Ã÷Ìá¹©ÁËÒ»ÖÖÖ¸ÎÆÈÏÖ¤·½·¨ºÍ×°ÖÃ£¬ÆäÖÐ·½·¨°üÀ¨£ºÔ¤ÏÈ½«ÓÃ»§Ö¸ÎÆÐÅÏ¢ÓëÓÃ»§ÈÏÖ¤ÐÅÏ¢µÄ°ó¶¨¹ØÏµ´æ´¢ÓÚÖÇÄÜÖÕ¶ËµÄ°²È«´æ´¢ÇøÓò£»ÔÚÓÃ»§Éí·ÝµÄÈÏÖ¤½×¶Î²É¼¯ÓÃ»§Ö¸ÎÆÐÅÏ¢£»½«²É¼¯µ½µÄÓÃ»§Ö¸ÎÆÐÅÏ¢Óë°²È«´æ´¢ÇøÓòÖÐµÄÓÃ»§Ö¸ÎÆÐÅÏ¢½øÐÐÆ¥Åä£¬È·¶¨Æ¥Åäµ½µÄÓÃ»§Ö¸ÎÆÐÅÏ¢¶ÔÓ¦µÄÓÃ»§ÈÏÖ¤ÐÅÏ¢£»½«È·¶¨µÄÓÃ»§ÈÏÖ¤ÐÅÏ¢·¢ËÍ¸ø·þÎñÆ÷¶ËÒÔ½øÐÐÓÃ»§Éí·ÝµÄÈÏÖ¤¡£±¾·¢Ã÷ÄÜ¹»¼ò»¯ÓÃ»§²Ù×÷£¬Ìá¸ßÈÏÖ¤°²È«ÐÔ£¬ÄÜ¹»Ó¦ÓÃÓÚÖîÈçÖ§¸¶ÀàÈÏÖ¤µÈ¸ß°²È«ÐÔÒªÇ…	°²È«
Ò»ÖÖÔÚÖÕ¶ËÉÏÉí·ÝÈÏÖ¤µÄ·½·¨ºÍ×°ÖÃ¼°ÖÕ¶Ë	ÖÐÐËÍ¨Ñ¶¹É·ÝÓÐÏÞ¹«Ë¾	2015-01-14	2016-08-10	CN105844123A	Ö÷·ÖÀàºÅ£ºG06F21/31(2013.01)I	ÔÚÉó-ÊµÖÊÉó²éµÄÉúÐ§	518057 ¹ã¶«Ê¡ÉîÛÚÊÐÄÏÉ½Çø¸ßÐÂ¼¼Êõ²úÒµÔ°¿Æ¼¼ÄÏÂ·ÖÐÐËÍ¨Ñ¶´óÏÃ·¨Îñ²¿	±¾·¢Ã÷Ìá¹©Ò»ÖÖÔÚÖÕ¶ËÉÏÉí·ÝÈÏÖ¤µÄ·½·¨ºÍ×°ÖÃ¼°ÖÕ¶Ë£»ËùÊö·½·¨£¬°üÀ¨£ºÔÚ½øÐÐÉí·ÝÑéÖ¤¹ý³ÌÖÐ£¬»ñÈ¡ÓÃ»§µ±Ç°ÊäÈëÐÅÏ¢¹ý³ÌÖÐµÄÐÐÎªÌØÕ÷ÐÅÏ¢£»¸ù¾ÝËùÊöÐÐÎªÌØÕ÷ÐÅÏ¢ÓëÔ¤ÏÈ´æ´¢µÄÐÐÎªÏ°¹ßÐÅÏ¢£¬¶ÔËùÊöÓÃ»§µÄÉí·Ý½øÐÐÑéÖ¤¡£	°²È«
Ò»ÖÖÔöÇ¿ÐÍ¶¯Ì¬¶þÎ¬ÂëÈÏÖ¤ÏµÍ³¼°ÆäÈÏÖ¤·½·¨	ÉÏº£ÖÚÈË¿Æ¼¼ÓÐÏÞ¹«Ë¾	2015-01-26	2015-05-06	CN104601332A	Ö÷·ÖÀàºÅ£ºH04L9/32(2006.01)I	ÓÐÐ§-ÊÚÈ¨	201203 ÉÏº£ÊÐÆÖ¶«ÐÂÇøÕÅ½­¸ß¿Æ¼¼Ô°Çø×æ³åÖ®Â·899ºÅ9´±01ÊÒ4²ã	±¾·¢Ã÷Ìá¹©ÁËÒ»ÖÖÔöÇ¿ÐÍ¶¯Ì¬¶þÎ¬ÂëÈÏÖ¤ÏµÍ³¼°Æä·½·¨£¬ÆäÖÐ£¬ÏµÍ³µÄ¿Í»§¶ËÖÐÖÁÉÙ°üÀ¨£ºÊý¾Ý»ñÈ¡Ä£¿é£¬ÓÃÓÚ»ñÈ¡ÓÃ»§ÐÅÏ¢ºÍÖ§¸¶ÐÅÏ¢£»µÚÒ»ÔËËãÄ£¿é£¬½áºÏÉÏÊöÐÅÏ¢ºÍµÚ¶þËã·¨Éú³ÉµÚÒ»¶¯Ì¬¿ÚÁî£»¶þÎ¬ÂëÉú³ÉÄ£¿é£¬½áºÏÉÏÊöÐÅÏ¢ÒÔ¼°µÚÒ»¶¯Ì¬¿ÚÁîÉú³É¶þÎ¬ÂëÐÅÏ¢£»·þÎñÆ÷ÖÐÖÁÉÙ°üÀ¨£ºËæ»úÊýÉú³ÉÄ£¿é£¬¸ù¾Ý´Ó¶þÎ¬ÂëÐÅÏ¢ÖÐ»ñÈ¡µÄÓÃ»§ÐÅÏ¢Éú³ÉÒ»Ëæ»úÊý£»Ëã·¨ÖØ¹¹Ä£¿é£¬ÓÃÓÚÍ¨¹ýÒ»Ô¤ÉèÖØ¹¹»úÖÆÖØ¹¹µÚÒ»Ëã·¨Éú³ÉµÚ¶þËã·¨£»µÚ¶þÔËËãÄ£¿é£¬½áºÏÓÃ»…	°²È«
Ò»ÖÖÒøÐÐ×Ô¶¯¹ñÔ±»úÉí·ÝÈÏÖ¤µÄ·½·¨ºÍÏµÍ³	Óà±þË³	2015-01-30	2015-04-29	CN104574696A	Ö÷·ÖÀàºÅ£ºG07F19/00(2006.01)I	ÓÐÐ§-ÊÚÈ¨	521000 ¹ã¶«Ê¡³±ÖÝÊÐÏæÇÅÇø³ÇÎ÷½ÖµÀ¼ª½Ö´åÐÂÏçÐÂÈÊÏï6ºÅ	·¢Ã÷¹«¿ªÁËÒ»ÖÖ·ÀÖ¹Î±Ôì»òÕß¸´ÖÆ¼ÙÃ°³Ö¿¨ÈËÒøÐÐ¿¨½øÐÐµÁÈ¡µÄ·½·¨ºÍÏµÍ³¡£ÏµÍ³ÌØµã£ºÒøÐÐ¿¨ÓÐ°¼²¿£¬°¼²¿Ñ¹ÈëÇ¦×Ó£¬Ç¦×Ó±íÃæÓÐÑ¹ÖýµÄÓ¡ÕÂ£»ºóÌ¨·þÎñÆ÷´¢´æÓÐÕË»§ÐÅÏ¢ºÍÓ¡ÕÂÍ¼ÏñÊý¾Ý£»×Ô¶¯¹ñÔ±»úÖÐ°²×°ÓÐÉãÏñÍ·¡¢¶Á¿¨Æ÷¡¢ÊÕ·¢Æ÷ÒÔ¼°±È½ÏÆ÷£»È¡¿î»ò×ªÕËÊ±£¬ÏµÍ³½øÐÐÏÂÁÐ²Ù×÷£º¶Á¿¨Æ÷¶ÁÈ¡ÒøÐÐ¿¨µÄÕË»§ÐÅÏ¢;ÉãÏñÍ·¶ÔÒøÐÐ¿¨ÖÐÇ¦×Ó±íÃæ½øÐÐÉãÏñÒÔ»ñÈ¡±íÃæÍ¼ÏñÊý¾Ý£»ÊÕ·¢Æ÷ÒÀ¾ÝÕË»§ÐÅÏ¢´ÓºóÌ¨·þÎñÆ÷¶ÁÈ¡ÏàÓ¦µÄÓ¡ÕÂÍ¼ÏñÊý¾Ý£»±È½ÏÆ÷±È¶Ô±íÃæ…	°²È«
Ò»ÖÖÐÅÏ¢´¦Àí·½·¨¼°×°ÖÃ	ÁªÏë£¨±±¾©£©ÓÐÏÞ¹«Ë¾	2015-02-02	2015-04-29	CN104573446A	Ö÷·ÖÀàºÅ£ºG06F21/31(2013.01)I	ÔÚÉó-ÊµÖÊÉó²éµÄÉúÐ§	100085 ±±¾©ÊÐº£µíÇøÉÏµØÐÅÏ¢²úÒµ»ùµØ´´ÒµÂ·6ºÅ	±¾ÉêÇëÊµÊ©ÀýÌá¹©ÁËÒ»ÖÖÐÅÏ¢´¦Àí·½·¨ºÍ×°ÖÃ£¬ËùÊö·½·¨°üÀ¨£º»ñÈ¡´ý´¦ÀíÐÅÏ¢£»²É¼¯µÚÒ»ÓÃ»§µÄµÚÒ»ÉúÎïÌØÕ÷ÐÅÏ¢£¬²¢¸ù¾ÝËùÊöµÚÒ»ÉúÎïÌØÐÔÐÅÏ¢Éú³ÉÎ¨Ò»±êÊ¶ËùÊöµÚÒ»ÓÃ»§µÄµÚÒ»Éí·Ý±êÊ¶£»½«ËùÊö´ý´¦ÀíÐÅÏ¢ÓëËùÊöµÚÒ»Éí·Ý±êÊ¶¶ÔÓ¦±£´æ£¬ÒÔ±ãÓÚµÚ¶þµç×ÓÉè±¸Í¨¹ýÌá¹©ËùÊöµÚÒ»Éí·Ý±êÊ¶£¬ÄÜ¹»»ñÈ¡ÓëËùÊöµÚÒ»Éí·Ý±êÊ¶¶ÔÓ¦±£´æµÄËùÊö´ý´¦ÀíÐÅÏ¢¡£±¾ÉêÇëÊµÊ©ÀýÌá¸ßÁËÐÅÏ¢µÄ°²È«ÐÔ¡£	°²È«
Ò»ÖÖ°²È«¼ì²â·½·¨¼°×°ÖÃ	ÖÐ¹úÒÆ¶¯Í¨ÐÅ¼¯ÍÅ¹ã¶«ÓÐÏÞ¹«Ë¾	2015-02-10	2016-02-10	CN105320889A	Ö÷·ÖÀàºÅ£ºG06F21/57(2013.01)I	ÓÐÐ§-ÊµÖÊÉó²éµÄÉúÐ§	510523 ¹ã¶«Ê¡¹ãÖÝÊÐÌìºÓÇøÖé½­ÐÂ³Ç½­Î÷Â·11ºÅ¹ã¶«È«ÇòÍ¨´óÏÃ	±¾·¢Ã÷ÊµÊ©ÀýÌá¹©ÁËÒ»ÖÖ°²È«¼ì²â·½·¨¼°×°ÖÃ£¬ÆäÖÐµÄ·½·¨°üÀ¨£º½ÓÊÕ°²È«¼ì²âÖ¸Áî£»¸ù¾ÝËùÊö°²È«¼ì²âÖ¸ÁîÉú³É²¢ÏÔÊ¾°²È«¼ì²â·þÎñÁÐ±í£¬ËùÊö°²È«¼ì²â·þÎñÁÐ±íÖÐ°üÀ¨¶à¸ö°²È«¼ì²â·þÎñÑ¡Ïî£¬Ã¿¸öËùÊö°²È«¼ì²â·þÎñÑ¡ÏîÔÚºóÌ¨¶¼¶ÔÓ¦ÓÐÏàÓ¦µÄ°²È«¼ì²â¹¤¾ß¼°ÓëËùÊö°²È«¼ì²â¹¤¾ß×éºÏÔÚÒ»ÆðµÄ°²È«¼ì²âÄ£°å£»½ÓÊÕ¶Ô´ý¼ì²â¶ÔÏóµÄÑ¡ÔñÖ¸ÁîÒÔ¼°¶ÔËùÊö°²È«¼ì²â·þÎñÁÐ±íÖÐµÄ°²È«¼ì²â·þÎñÑ¡ÏîµÄÑ¡ÔñÖ¸Áî£»Ê¹ÓÃËùÑ¡ÔñµÄ°²È«¼ì²â·þÎñÑ¡ÏîËù¶ÔÓ¦µÄ°²È«¼…	°²È«
Ò»ÖÖ¾ßÓÐ·´ÉäÊ½ÈËÌåÊÖÖ¸¾²ÂöÊ¶±ðµÄÊó±ê	ÉîÛÚÊÐÎ¬ÒÚÆÇ¿Æ¼¼ÓÐÏÞ¹«Ë¾	2015-02-11	2016-10-05	CN105989332A	Ö÷·ÖÀàºÅ£ºG06K9/00(2006.01)I	ÔÚÉó-ÊµÖÊÉó²éµÄÉúÐ§	518000 ¹ã¶«Ê¡ÉîÛÚÊÐÄÏÉ½Çø¿Æ¼¼Ô°¿ÆÔ·Â·15ºÅ¿ÆÐË¿ÆÑ§Ô°A¶°1µ¥Ôª505ºÅµ¥Î»	±¾·¢Ã÷Ìá³öÁËÒ»ÖÖ¾ßÓÐ·´ÉäÊ½ÈËÌåÊÖÖ¸¾²ÂöÊ¶±ðµÄÊó±ê£¬°üÀ¨Êó±ê±¾Ìå¼°ÉèÖÃÓÚÊó±ê±¾ÌåÄÚµÄ²»Í¸¿É¼û¹âºÍºìÍâ¹âµÄ½á¹¹£»ËùÊö²»Í¸¿É¼û¹âºÍºìÍâ¹âµÄ½á¹¹ÄÚÉèÖÃÓÐ¾²ÂöÊ¶±ð×°ÖÃ£¬ËùÊö¾²ÂöÊ¶±ð×°ÖÃ²É¼¯²¢»ñÈ¡±»²âÊÖÖ¸¾²ÂöÍ¼Ïñ¡£Ê¹ÓÃ±¾·¢Ã÷¼¼Êõ·½°¸£¬¿ÉÖ±½ÓÍ¨¹ýµçÄÔÊó±ê½øÐÐÊÖÖ¸¾²ÂöÊ¶±ð£¬²Ù×÷¼òµ¥£¬²¢ÇÒ¼«´óÌá¸ßÁË»¥ÁªÍøÖ§¸¶ÖÐµÄ°²È«ÐÔÄÜ¡£	°²È«
Ò»ÖÖ²ÉÓÃÃæ²¿Ê¶±ð¡¢Ãæ²¿¾²ÂöÈÏÖ¤ÓëÊÖÖ¸¾²ÂöÈÏÖ¤Ïà½áºÏµÄÈÏÖ¤×°ÖÃ¼°ÈÏÖ¤·½·¨	ÕÅÀöÇÙ	2015-02-12	2015-05-06	CN104598797A	Ö÷·ÖÀàºÅ£ºG06F21/32(2013.01)I	ÓÐÐ§-ÊÚÈ¨	417500 ºþÄÏÊ¡Â¦µ×ÊÐÀäË®½­ÊÐÀäË®½­½ÖµÀ°ìÊÂ´¦½¨ÐÂ¾ÓÎ¯»á18×é	Ò»ÖÖ²ÉÓÃÃæ²¿Ê¶±ð¡¢Ãæ²¿¾²ÂöÈÏÖ¤ÓëÊÖÖ¸¾²ÂöÈÏÖ¤Ïà½áºÏµÄÈÏÖ¤×°ÖÃ°üÀ¨Ãæ²¿Ê¶±ð×°ÖÃ¡¢ÊÖÖ¸¾²ÂöÌØÕ÷ÐÅÏ¢²É¼¯×°ÖÃºÍÓëÊÖÖ¸¾²ÂöÌØÕ÷ÐÅÏ¢²É¼¯×°ÖÃÁ¬½ÓµÄÃæ²¿¾²ÂöÌØÕ÷ÐÅÏ¢²É¼¯×°ÖÃ£¬¸ÃÈÏÖ¤×°ÖÃ»¹°üÀ¨Ì¨Ìå¡£ÈÏÖ¤·½·¨µÄÌØÕ÷Æ¥Åä×éÖÐÍ¬Ê±°üÀ¨ÁË´øÓÐ½Ç¶ÈÐÅÏ¢µÄÊÖÖ¸¾²ÂöÌØÕ÷ÐÅÏ¢ÒÔ¼°Í¬Ê±²É¼¯µÄÃæ²¿Ê¶±ðÌØÕ÷ÐÅÏ¢¡¢Ãæ²¿¾²ÂöÌØÕ÷ÐÅÏ¢¡£¸ÃÈÏÖ¤×°ÖÃºÍÈÏÖ¤·½·¨¾ßÓÐ¸ü¸ßµÄ°²È«ÐÔºÍÊµÓÃÐÔ£¬²¢Ìá¸ßÈÏÖ¤µÄ¾«¶È¡£	°²È«
Ò»ÖÖºËÑéÉè±¸	±±¾©º£öÎ¿Æ½ð¸ß¿Æ¼¼¹É·ÝÓÐÏÞ¹«Ë¾	2015-02-16	2015-06-10	CN104700014A	Ö÷·ÖÀàºÅ£ºG06F21/32(2013.01)I	Ê§Ð§-·¢Ã÷×¨ÀûÉêÇë¹«²¼ºóµÄ²µ»Ø	100070 ±±¾©ÊÐ·áÌ¨ÇøÄÏËÄ»·Î÷Â·186ºÅººÍþ¹ú¼Ê¹ã³¡ËÄÇø4ºÅÂ¥6²ã	±¾·¢Ã÷¹«¿ªÁËÒ»ÖÖºËÑéÉè±¸£¬¸ÃÉè±¸°üÀ¨£ºÏÔÊ¾ÆÁ¡¢Éí·ÝÌØÕ÷ÐÅÏ¢²É¼¯Æ÷ºÍÉí·ÝÌØÕ÷ÐÅÏ¢±È½ÏÆ÷£¬ËùÊöÉí·ÝÌØÕ÷ÐÅÏ¢²É¼¯Æ÷ºÍËùÊöÉí·ÝÌØÕ÷ÐÅÏ¢±È½ÏÆ÷ÏàÁ¬£»ËùÊöÉí·ÝÌØÕ÷ÐÅÏ¢²É¼¯Æ÷£¬ÓÃÓÚ²É¼¯Í¨¹ØÈËÔ±µÄÖÁÉÙÁ½ÖÖÉí·ÝÌØÕ÷ÐÅÏ¢£»ËùÊöÉí·ÝÌØÕ÷ÐÅÏ¢±È½ÏÆ÷£¬ÓÃÓÚ¶ÔËùÊöÉí·ÝÌØÕ÷ÐÅÏ¢²É¼¯×°ÖÃ²É¼¯Í¨¹ØÈËÔ±µÄÖÁÉÙÁ½ÖÖÉí·ÝÌØÕ÷ÐÅÏ¢½øÐÐ±È½Ï£»ËùÊöÏÔÊ¾ÆÁ£¬ÓÃÓÚÏÔÊ¾ËùÊöÉí·ÝÌØÕ÷ÐÅÏ¢²É¼¯×°ÖÃ²É¼¯µÄÍ¨¹ØÈËÔ±µÄÖÁÉÙÁ½ÖÖÉí·ÝÌØÕ÷ÐÅÏ¢£¬ÒÔ¼°ÏÔÊ¾Í¨¹ØÈËÔ±Ê…	°²È«
Ò»ÖÖÃÜÂë	Íô·çÕä	2015-02-17	2016-10-05	CN105989309A	Ö÷·ÖÀàºÅ£ºG06F21/77(2013.01)I	ÔÚÉó-ÊµÖÊÉó²éµÄÉúÐ§	427226 ºþÄÏÊ¡ÕÅ¼Ò½çÊÐ´ÈÀûÏØ¾°ÁúÇÅÏç¾®Èª´å9×é	Ò»ÖÖÐèÒªÓ²¼þÌá¹©¼ÓÃÜÊý¾ÝµÄÃÜÂë£¬ËüÊÇÍ¨¹ýÈý·½»òÈý·½ÒÔÉÏµÄÊý¾ÝÔÚ¼ÆËã»úÖÕ¶ËºÏ³ÉµÄÃÜÂë£¬ÕâÖÖÃÜÂë×éºÏÊý·Ç³£¶à£¬²ÉÓÃÁË¶àÏî·´ÄæÏòÆÆ½â¼¼Êõ£¬±©Á¦ÆÆ½â£¬´ÊµäÆÆ½âÃÜÂë·¨ÄÑÒÔÊµÏÖ£¬ÓÉÓÚÊµÏÖ¶¯Ì¬ÃÜÂëºÍÓ²¼þÊý¾Ý½áºÏ£¬¼ÓÇ¿ÁËÒøÐÐ¿¨µÈÁìÓòµÄÃÜÂë°²È«¡£	°²È«
Ò»ÖÖÉùÎÆÈÏÖ¤ÊÖ»úÖ§¸¶ÏµÍ³µÄ¹¹³É·½·¨	¹ËÔó²Ô	2015-02-17	2016-10-05	CN105989492A	Ö÷·ÖÀàºÅ£ºG06Q20/40(2012.01)I	ÓÐÐ§-ÊµÖÊÉó²éµÄÉúÐ§	300384 Ìì½òÊÐ»ªÔ·²úÒµÇøéÅÔ·Â·15ºÅ1-B-1803	±¾·¢Ã÷ÊôÓÚÍ¼Ïñ´¦ÀíÁìÓòÖÐµÄÒ»ÖÖÉùÎÆÈÏÖ¤ÊÖ»úÖ§¸¶ÏµÍ³µÄ¹¹³É·½·¨£¬ÊÇÓÉÑ¡ÔñÒª¹ºÂòµÄÉÌÆ·²½Öè£¬ÔÚÊÖ»úÉÏÑ¡ÔñÐÅÓÃ¿¨²½Öè£¬×Ô¶¯½øÈëÉùÎÆÈÏÖ¤µÄ²½Öè£¬ÊÖ»úÖ§¸¶²½Öè×é³ÉµÄ£¬ÆäÌØµãÊÇ£º¸ÃÏµÍ³µ¼Èë¸ÅÂÊ³ß¶È¾àÀëµÄÀíÂÛ£¬¿ÉÒÔÖ±½Ó½«ÉùÎÆ±ä»»³É´úÂë£¬¿ÉÒÔÖ±½Ó×÷ÎªÊÖ»úÖ§¸¶µÄÃÜÂë£¬ÔÚÍøÂç´«ÊäÉÏËÙ¶È¿ì£¬¶øÇÒ¿ÉÒÔ½«ÉùÎÆËù±ä»»³ÉµÄ´úÂëÖ±½Ó×÷ÎªÊÖ»úÖ§¸¶µÄÃÜÂë£¬ÔÚÏµÍ³´î½¨ÉÏÎÞÐèÊ¹Ô­ÓÐÏµÍ³×ö½Ï¶àµÄ¸Ä±ä£¬¼õÉÙÍ¶Èë³É±¾¡£ÁíÍâ£¬ÉùÎÆÖ§¸¶´úÂëÎÈ¶¨£…	°²È«
Ò»ÖÖ»ùÓÚÒøÐÐÏµÍ³µÄ²Ù¿Ø°²È«¿ØÖÆ·½·¨¼°×°ÖÃ	ÖÐ¹úÒøÐÐ¹É·ÝÓÐÏÞ¹«Ë¾	2015-03-06	2015-05-27	CN104657656A	Ö÷·ÖÀàºÅ£ºG06F21/45(2013.01)I	ÓÐÐ§-ÊÚÈ¨	100818 ±±¾©ÊÐÎ÷³ÇÇø¸´ÐËÃÅÄÚ´ó½Ö1ºÅ	±¾·¢Ã÷Ìá¹©Ò»ÖÖ»ùÓÚÒøÐÐÏµÍ³µÄ²Ù¿Ø°²È«¿ØÖÆ·½·¨¼°×°ÖÃ£¬ËùÊö·½·¨°üÀ¨£º»ñÈ¡Ô¤ÏÈÉè¶¨µÄ²Ù×÷Ô±È¨ÏÞ¡¢½»Ò×È¨ÏÞ¡¢½»Ò×Èº×é¡¢²Ù×÷Ô±Èº×é£»¸ù¾ÝËùÊöµÄ²Ù×÷Ô±È¨ÏÞ¡¢½»Ò×È¨ÏÞ¡¢½»Ò×Èº×é¡¢²Ù×÷Ô±Èº×éÈ·¶¨µ±Ç°²Ù×÷Ô±µÄ×ÛºÏÈ¨ÏÞ£»È·¶¨µ±Ç°½»Ò×µÄÈ¨ÏÞ²Ù×÷Ö¸Òý£»¸ù¾ÝËùÊöµÄ×ÛºÏÈ¨ÏÞÒÔ¼°µ±Ç°½»Ò×µÄÈ¨ÏÞ²Ù×÷Ö¸Òý´¥·¢¶ÔÓ¦µÄ¿ØÖÆÁ÷³Ì¡£Í¨¹ý¶àÎ¬¶ÈÉèÖÃÈ¨ÏÞÐÅÏ¢ºÍ½»Ò×È¨ÏÞ²Ù×÷Ö¸Òý£¬×ÛºÏÅÐ¶Ï²Ù×÷Ô±×ÛºÏÈ¨ÏÞ²¢¸ù¾Ý½»Ò×È¨ÏÞ²Ù×÷Ö¸Òý´¥·¢²»Í¬µÄ¿ØÖÆ´¦Àí£…	°²È«
Ò»ÖÖÖ½ÖÊ²ÆÎñµµ°¸µÄ·Ö¼¶·ÃÎÊ°²È«¿ØÖÆÉè±¸¼°·½·¨	É½¶«¿Æ¼¼´óÑ§	2015-03-09	2015-07-08	CN104766265A	Ö÷·ÖÀàºÅ£ºG06T1/00(2006.01)I	ÔÚÉó-ÊµÖÊÉó²éµÄÉúÐ§	266590 É½¶«Ê¡ÇàµºÊÐ¾­¼Ã¼¼Êõ¿ª·¢ÇøÇ°Íå¸ÛÂ·579ºÅ	±¾·¢Ã÷¹«¿ªÁËÒ»ÖÖÖ½ÖÊ²ÆÎñµµ°¸µÄ·Ö¼¶·ÃÎÊ°²È«¿ØÖÆÉè±¸¼°·½·¨¡£ËùÊö°²È«¿ØÖÆÉè±¸°üÀ¨£º»úÃÜÐÅÏ¢·Ö¸îÉè±¸£¬ÓÃÓÚ½«´ýÓ¡Ë¢µÄÃØÃÜÐÅÏ¢·Ö¸îÎªÁ½·ùÍêÈ«ÎÞÒâÒåµÄ·Ö´æÍ¼Ïñ£»ÃØÃÜµµ°¸ºÍÃÉ°åÓ¡Ë¢Éè±¸£¬ÓÃÓÚÊä³öÖ½ÖÊµµ°¸ºÍÍ¶Ó°½ºÆ¬£¬ÆäÖÐÒ»·ù·Ö´æÍ¼Ïñ´òÓ¡µ½Ö½ÖÊµµ°¸µÄÃØÃÜÐÅÏ¢Çø£¬ÁíÒ»·ù·Ö´æÍ¼Ïñ´òÓ¡µ½Í¶Ó°½ºÆ¬ÉÏ£»ÃØÃÜµµ°¸¶ÁÈ¡Éè±¸£¬ÀûÓÃÍ¶Ó°½ºÆ¬»Ö¸´Ö½ÖÊµµ°¸µÄÃØÃÜÐÅÏ¢ÇøÄÚµÄÃØÃÜÐÅÏ¢¡£±¾·¢Ã÷¾ßÓÐÃØÃÜÐÅÏ¢°²È«¡¢½âÃÜ¼òµ¥ÇÒ²»Ðè¼ÆËã»úµÈÓÅµã£…	°²È«
Ò»ÖÖ°²È«Ö§¸¶·½·¨¼°×°ÖÃ	¹ã¶«Å·çêÒÆ¶¯Í¨ÐÅÓÐÏÞ¹«Ë¾	2015-03-18	2015-07-15	CN104778587A	Ö÷·ÖÀàºÅ£ºG06Q20/40(2012.01)I	ÔÚÉó-ÊµÖÊÉó²éµÄÉúÐ§	523860 ¹ã¶«Ê¡¶«Ý¸ÊÐ³¤°²ÕòÎÚÉ³º£±õÂ·18ºÅ	±¾·¢Ã÷ÊµÊ©Àý¹«¿ªÁËÒ»ÖÖ°²È«Ö§¸¶·½·¨¼°×°ÖÃ£¬·½·¨°üÀ¨£ºµ±¼ì²âµ½¶ÔÔ¤Ö¸¶¨µÄÖ§¸¶Ó¦ÓÃ³ÌÐòµÄÖ§¸¶½çÃæµÄ´ò¿ªÇëÇóÊ±£¬Ìá¹©µÚÒ»Éí·ÝÐÅÏ¢²É¼¯½Ó¿Ú£¬´ÓËùÊöµÚÒ»Éí·ÝÐÅÏ¢²É¼¯½Ó¿Ú²É¼¯ÓÃ»§µÄµÚÒ»Éí·ÝÐÅÏ¢£»¶ÔËùÊöµÚÒ»Éí·ÝÐÅÏ¢ÓëÔ¤ÏÈÉèÖÃµÄµÚ¶þÉí·ÝÐÅÏ¢½øÐÐÆ¥ÅäÑéÖ¤£¬µ±ÑéÖ¤Í¨¹ýÊ±£¬ÔÊÐíËùÊöÖ§¸¶Ó¦ÓÃ³ÌÐòµÄÖ§¸¶½çÃæ´ò¿ª£¬ÒÔÍ¨¹ýËùÊöÖ§¸¶½çÃæ½øÐÐÖ§¸¶£¬ÄÜÌá¸ßÖÕ¶ËÖ§¸¶µÄ°²È«ÐÔ¡£	°²È«
Ò»ÖÖÊý¾Ý·ÃÎÊ·½·¨	ÉîÛÚÊÐ½ðÁ¢Í¨ÐÅÉè±¸ÓÐÏÞ¹«Ë¾	2015-03-19	2015-07-08	CN104765997A	Ö÷·ÖÀàºÅ£ºG06F21/32(2013.01)I	ÔÚÉó-ÊµÖÊÉó²éµÄÉúÐ§	518040 ¹ã¶«Ê¡ÉîÛÚÊÐ¸£ÌïÇøÉîÄÏ´óµÀ7028ºÅÊ±´ú¿Æ¼¼´óÏÃ¶«×ù21Â¥	±¾·¢Ã÷ÊµÊ©ÀýÌá¹©ÁËÒ»ÖÖÊý¾Ý·ÃÎÊ·½·¨£¬¸Ã·½·¨°üÀ¨£ºÄ¿±êÖÕ¶ËÔÚ½ÓÊÕµ½·¢ÆðÖÕ¶Ë·¢ËÍµÄÊý¾Ý·ÃÎÊÇëÇóÊ±£¬»ñÈ¡ÓÃ»§ÊäÈëµÄÌØÕ÷ÐÅÏ¢£»Ä¿±êÖÕ¶ËÅÐ¶ÏÊäÈëµÄÌØÕ÷ÐÅÏ¢ÓëÔ¤ÏÈ´æ´¢µÄ×¢²áÌØÕ÷ÐÅÏ¢ÊÇ·ñÆ¥Åä£»ÈôÆ¥Åä£¬ÔòÄ¿±êÖÕ¶ËÏìÓ¦¸ÃÊý¾Ý·ÃÎÊÇëÇó£¬²¢½¨Á¢Óë·¢ÆðÖÕ¶ËÖ®¼äµÄÊý¾ÝÁ¬½Ó¡£¿É¼û£¬±¾·¢Ã÷ÊµÊ©Àý¿ÉÒÔÔÚÌØÕ÷ÐÅÏ¢Æ¥ÅäÊ±£¬²ÅÏìÓ¦·¢ÆðÖÕ¶ËµÄÊý¾Ý·ÃÎÊÇëÇó£¬´Ó¶øÌá¸ßÄ¿±êÖÕ¶ËÖÐÊý¾ÝµÄ°²È«ÐÔ¡£	°²È«
Ò»ÖÖÓÃÓÚÈÏÖ¤µÄ·½·¨¡¢×°ÖÃ¡¢Éè±¸ÓëÏµÍ³	°Ù¶ÈÔÚÏßÍøÂç¼¼Êõ£¨±±¾©£©ÓÐÏÞ¹«Ë¾	2015-03-24	2015-07-22	CN104794381A	Ö÷·ÖÀàºÅ£ºG06F21/31(2013.01)I	ÔÚÉó-ÊµÖÊÉó²éµÄÉúÐ§	100085 ±±¾©ÊÐº£µíÇøÉÏµØÊ®½Ö10ºÅ°Ù¶È´óÏÃ	±¾·¢Ã÷µÄÄ¿µÄÊÇÌá¹©Ò»ÖÖÓÃÓÚÈÏÖ¤µÄ·½·¨¡¢×°ÖÃ¡¢Éè±¸ÓëÏµÍ³¡£ÆäÖÐ£¬±¾·¢Ã÷ÓÉÒÆ¶¯Éè±¸ÓëÒ»¸ö»ò¶à¸ö¿É´©´÷µç×ÓÉè±¸½¨Á¢Æ¥Åä¹ØÏµ£¬²¢ÓÉÒÆ¶¯Éè±¸½èÖú¿É´©´÷µç×ÓÉè±¸À´»ùÓÚÓÃ»§µÄÉúÎïÌØÕ÷ÐÅÏ¢¶Ô¸ÃÓÃ»§½øÐÐÉí·ÝÈÏÖ¤¡£ÆäÖÐ£¬¿É´©´÷µç×ÓÉè±¸¿É×°ÖÃÓÐÒ»¸ö»ò¶à¸öÓÃÓÚ²É¼¯ÓÃ»§µÄÉúÎïÌØÕ÷ÐÅÏ¢µÄ´«¸ÐÆ÷¡£ÔÚ´Ë£¬±¾·¢Ã÷Ìá³öÁËÒ»ÖÖÈ«ÐÂµÄÉí·ÝÈÏÖ¤·½°¸£¬Æä¿ÉÒÔ±»ÓÃÓÚ¶àÖÖÓÃÍ¾£¬ÀýÈçÖ§¸¶¡¢ÕËºÅµÇÂ½µÈ¡£	°²È«
¿ØÖÆÖÇÄÜ´©´÷Éè±¸´©´÷µÄ·½·¨¡¢×°ÖÃºÍÒ»ÖÖÖÇÄÜ´©´÷Éè±¸	¹ã¶«Å·çêÒÆ¶¯Í¨ÐÅÓÐÏÞ¹«Ë¾	2015-03-30	2018-03-13	CN107798232A	Ö÷·ÖÀàºÅ£ºG06F21/32(2013.01)I	ÔÚÉó-ÊµÖÊÉó²éµÄÉúÐ§	523860 ¹ã¶«Ê¡¶«Ý¸ÊÐ³¤°²ÕòÎÚÉ³º£±õÂ·18ºÅ	±¾·¢Ã÷¹«¿ªÁË¿ØÖÆÖÇÄÜ´©´÷Éè±¸´©´÷µÄ·½·¨¡¢×°ÖÃºÍÒ»ÖÖÖÇÄÜ´©´÷Éè±¸£¬ÒÔÌá¸ßÖÇÄÜ´©´÷Éè±¸±¾ÉíºÍ´©´÷ÕßµÄ°²È«ÐÔ¡£ËùÊö·½·¨°üÀ¨£º²É¼¯ÖÇÄÜ´©´÷Éè±¸µ±Ç°´©´÷ÕßµÄÉúÎïÌØÕ÷ÐÅÏ¢£»´ÓÊý¾Ý¿âÆ¥Åä²É¼¯µÄÉúÎïÌØÕ÷ÐÅÏ¢£»ÅÐ¶ÏÊÇ·ñ´ÓÊý¾Ý¿âÆ¥Åäµ½ÖÇÄÜ´©´÷Éè±¸ºÏ·¨ÓÃ»§µÄÉúÎïÌØÕ÷ÐÅÏ¢£»Èô´ÓÊý¾Ý¿âÆ¥Åäµ½ÖÇÄÜ´©´÷Éè±¸ºÏ·¨ÓÃ»§µÄÉúÎïÌØÕ÷ÐÅÏ¢£¬ÔòÏò¶¯Á¦»ú¹¹·¢ËÍ½âËø¿ØÖÆÖ¸Áî¡£±¾·¢Ã÷Ò»·½ÃæÌá¸ßÁËÖÇÄÜ´©´÷Éè±¸³¹µ×¶ªÊ§µÄ¸ÅÂÊ£¬Ò»¶¨³Ì¶ÈÉÏÌá¸ßÁËÖÇÄÜ´…	°²È«
ÐÅÏ¢²É¼¯ÈÏÖ¤ÏµÍ³	ÖÐ¹ú¹¤ÉÌÒøÐÐ¹É·ÝÓÐÏÞ¹«Ë¾	2015-04-03	2015-06-17	CN104715176A	Ö÷·ÖÀàºÅ£ºG06F21/31(2013.01)I	ÓÐÐ§-ÊÚÈ¨	100140 ±±¾©ÊÐÎ÷³ÇÇø¸´ÐËÃÅÄÚ´ó½Ö55ºÅ	±¾·¢Ã÷Ìá¹©ÁËÒ»ÖÖÐÅÏ¢²É¼¯ÈÏÖ¤ÏµÍ³£¬°üÀ¨£ºÐÅÏ¢²É¼¯ÈÏÖ¤×°ÖÃ¡¢¹«Ãñ·Ç½ðÈÚ×¨ÓÃ»úÃÜÐÅÏ¢ÈÏÖ¤·þÎñÆ÷¼°½ðÈÚ·þÎñÖÕ¶Ë£»½ðÈÚ·þÎñÖÕ¶Ë·¢³ö²É¼¯·Ç½ðÈÚ×¨ÓÃ»úÃÜÐÅÏ¢Ö¸Áî£»ÐÅÏ¢²É¼¯ÈÏÖ¤×°ÖÃÁ¬½Ó½ðÈÚ·þÎñÖÕ¶Ë£¬¸ù¾Ý²É¼¯·Ç½ðÈÚ×¨ÓÃ»úÃÜÐÅÏ¢Ö¸Áî²É¼¯¹«Ãñ·Ç½ðÈÚ×¨ÓÃ»úÃÜÐÅÏ¢£¬½«²É¼¯µÄ¹«Ãñ·Ç½ðÈÚ×¨ÓÃ»úÃÜÐÅÏ¢·¢ËÍÖÁ¹«Ãñ·Ç½ðÈÚ×¨ÓÃ»úÃÜÐÅÏ¢ÈÏÖ¤·þÎñÆ÷ÈÏÖ¤£»¹«Ãñ·Ç½ðÈÚ×¨ÓÃ»úÃÜÐÅÏ¢ÈÏÖ¤·þÎñÆ÷Êä³öÈÏÖ¤½á¹ûÖÁÐÅÏ¢²É¼¯ÈÏÖ¤×°ÖÃ£»²É¼¯ÈÏÖ¤×°ÖÃ½ÓÊÕÈÏÖ…	Êý¾Ý·ÖÎö
Ò»ÖÖ¼´Ê±´¥·¢ÂòÂôË«·½¿Í»§¶ËµÄ½»Ò×·½·¨¼°ÆäÏµÍ³	Ñî¹Ø½ð	2015-04-09	2015-07-08	CN104766214A	Ö÷·ÖÀàºÅ£ºG06Q30/00(2012.01)I	ÔÚÉó-ÊµÖÊÉó²éµÄÉúÐ§	610400 ËÄ´¨Ê¡³É¶¼ÊÐ½ðÌÃÏØÕÔÕò³É½ð´óµÀ666ºÅ23¶°1µ¥Ôª2Â¥4ºÅ	±¾·¢Ã÷Éæ¼°½»Ò×ÏµÍ³¡£±¾·¢Ã÷Ìá¹©Ò»ÖÖ¼´Ê±´¥·¢ÂòÂôË«·½¿Í»§¶ËµÄ½»Ò×·½·¨£¬ÏµÍ³¼ì²âµ½×¢²áÓÃ»§ÊäÈëµÄÓÃ»§ÐÅÏ¢ºó£¬´¥·¢ÐéÄâ¹ºÎï³µ½çÃæÖÁÂòÂôË«·½µÄ¿Í»§¶Ë£¬ÎªÂòÂôË«·½´´½¨ÔÚÏß½»Ò×¹ØÏµ£»ÂòÂôË«·½·Ö±ð¶ÔÐéÄâ¹ºÎï³µ½çÃæµÄ½»Ò×Êý¾Ý½øÐÐÐÞ¸Ä£¬Ö±ÖÁÂòÂôË«·½È·ÈÏÍ¬Òâ½»Ò×£¬ÏµÍ³ÑéÖ¤½»Ò×ÐÅÏ¢ºóµ¯³ö½»Ò×½çÃæ£¬Âò¼ÒÍ¨¹ý°ó¶¨µÄÖ§¸¶ÕË»§½øÐÐÖ§¸¶»òÐí¿ÉÂô¼Ò°´È·ÈÏ½»Ò×½ð¶îÏÞ¶î¿Û¿î¡£Ò»ÖÖ¼´Ê±´¥·¢ÂòÂôË«·½¿Í»§¶ËµÄ½»Ò×ÏµÍ³£¬°üÀ¨ÐÅÏ¢ÊäÈëÄ£¿é£¬Âò¼…	Ö§¸¶
Ò»ÖÖ×Ô¶¯ÖÜÆÚÐÔÈÏÖ¤·½·¨	¹ãÖÝ½ÜÈü¿Æ¼¼¹É·ÝÓÐÏÞ¹«Ë¾	2015-04-14	2016-11-23	CN106156558A	Ö÷·ÖÀàºÅ£ºG06F21/31(2013.01)I	ÔÚÉó-ÊµÖÊÉó²éµÄÉúÐ§	510310 ¹ã¶«Ê¡¹ãÖÝÊÐº£ÖéÇøÐÂ¸ÛÖÐÂ·381ºÅ	±¾·¢Ã÷ÊµÊ©ÀýÌá³öÒ»ÖÖ×Ô¶¯ÖÜÆÚÐÔÈÏÖ¤·½·¨£¬S1£¬¼øÈ¨×°ÖÃ»ñÈ¡µ±Ç°Î»ÖÃÐÅÏ¢²¢ÅÐ¶ÏÊÇ·ñ´¦ÓÚÖÃÐÅÎ»ÖÃ£»S2£¬¼øÈ¨×°ÖÃ»ñÈ¡ÐÄµçÍ¼ÌØÕ÷ÐÅÏ¢²¢ÅÐ¶ÏÓëÔ¤´æÐÄµçÍ¼ÌØÕ÷ÐÅÏ¢ÊÇ·ñÆ¥Åä£»S3£¬ÖØ¸´S1ºÍS2£¬²¢°´ÕÕÖÜÆÚÐÔÈÏÖ¤ÒªÇóÊä³öÈÏÖ¤½á¹û¡£±¾·¢Ã÷ÊµÊ©ÀýÌá¹©µÄ×Ô¶¯ÖÜÆÚÐÔÈÏÖ¤·½·¨£¬ÀûÓÃÓÃ»§µÄÎ»ÖÃÐÅÏ¢ºÍÐÄÌøÐÅÏ¢×÷Îª¼øÈ¨Ìõ¼þ£¬¿ÉÔÚ²»Ó°Ïì±ã½ÝÖ§¸¶µÄ»ù´¡ÉÏ£¬ÓÐÐ§ÔöÇ¿°²È«ÐÔ·À»¤£¬±ÜÃâÔ¶³ÌµÁÓÃ»òÕßÊÖ»úµÈÖ§¸¶Éè±¸¶ªÊ§ºó´øÀ´µÄ²Æ²úËðÊ§·çÏÕ¡£	°²È«
Ò»ÖÖÉí·ÝÈÏÖ¤µÄ·½·¨¼°ÖÕ¶Ë	ÓîÁú¼ÆËã»úÍ¨ÐÅ¿Æ¼¼£¨ÉîÛÚ£©ÓÐÏÞ¹«Ë¾	2015-04-24	2016-05-11	CN105574384A	Ö÷·ÖÀàºÅ£ºG06F21/32(2013.01)I	ÔÚÉó-ÊµÖÊÉó²éµÄÉúÐ§	518057 ¹ã¶«Ê¡ÉîÛÚÊÐÄÏÉ½Çø¸ßÐÂ¼¼Êõ²úÒµÔ°(±±Çø)ÃÎÏªµÀ2ºÅ	±¾·¢Ã÷ÊµÊ©Àý¹«¿ªÁËÒ»ÖÖÉí·ÝÈÏÖ¤µÄ·½·¨¼°ÖÕ¶Ë£¬°üÀ¨£ºµ±ÖÕ¶Ë¼ì²âµ½ÓÃ»§ÊäÈë´¥¿ØÖ¸ÁîÊ±£¬Ôò¸ù¾Ý´¥¿ØÖ¸ÁîËù´¥ÅöµÄÎ»ÖÃÈ·¶¨±¾´ÎÉí·ÝÈÏÖ¤µÄÈÏÖ¤ÇøÓò£»µ±¼ì²âÔÚÈÏÖ¤ÇøÓò»ñÈ¡µÄÉúÎïÌØÕ÷ÐÅÏ¢ÓëÔ¤ÏÈ´æ´¢µÄÉúÎïÌØÕ÷ÐÅÏ¢Ò»ÖÂÊ±£¬ÔòÈ·¶¨±¾´ÎÉí·ÝÈÏÖ¤³É¹¦¡£ÊµÊ©±¾·¢Ã÷ÊµÊ©Àý£¬ÈÏÖ¤ÇøÓò²»ÐèÒªÔ¤ÏÈÉè¶¨£¬¶øÊÇ¸ù¾ÝÓÃ»§ÊäÈëµÄ´¥¿ØÖ¸ÁîËù´¥ÅöµÄÎ»ÖÃÀ´È·¶¨ÈÏÖ¤ÇøÓò¡£´Ó¶ø¿ÉÒÔÌá¸ßÉí·ÝÈÏÖ¤¹ý³ÌÖÐµÄÈÏÖ¤Ð§ÂÊ¡£	°²È«
ÒÆ¶¯Ö§¸¶×°ÖÃºÍ·½·¨	»ªÎª¼¼ÊõÓÐÏÞ¹«Ë¾	2015-04-24	2015-07-15	CN104778794A	Ö÷·ÖÀàºÅ£ºG07G1/14(2006.01)I	ÓÐÐ§-ÊÚÈ¨	518129 ¹ã¶«Ê¡ÉîÛÚÊÐÁú¸ÚÇøÛàÌï»ªÎª×Ü²¿°ì¹«Â¥	Ò»ÖÖÒÆ¶¯Ö§¸¶×°ÖÃºÍ·½·¨£¬Éæ¼°ÒÆ¶¯Í¨ÐÅÁìÓò¡£¸ÃÒÆ¶¯Ö§¸¶×°ÖÃ°üÀ¨£ºÍ¨ÐÅµ¥Ôª£¬ÓÃÓÚÍ¨¹ýÎÞÏßÁ´Â·ÓëÍ¨ÐÅ¶Ô¶Ë½»»¥Ö§¸¶ÐÅÏ¢£»´æ´¢Æ÷£¬ÓÃÓÚ´æ´¢ÒÆ¶¯Ö§¸¶Èí¼þ£»°²È«Ôª¼þ£¬°üÀ¨µÚÒ»´æ´¢Ä£¿éºÍ´¦ÀíÆ÷£»ÖÁÉÙÒ»¸öÖÐÑë´¦Àíµ¥Ôª£¬ÓÃÓÚÔËÐÐÍ¨ÓÃ²Ù×÷ÏµÍ³Èí¼þ£¬²¢ÔÚÍ¨ÓÃ²Ù×÷ÏµÍ³Èí¼þµÄ×÷ÓÃÏÂ¿ØÖÆËùÊöÍ¨ÐÅµ¥Ôª¡¢´æ´¢Æ÷ºÍËùÊö°²È«Ôª¼þÖÐµÄÖÁÉÙÒ»¸ö£»ËùÊö´¦ÀíÆ÷ÓÃÓÚ½«ËùÊöÒÆ¶¯Ö§¸¶Èí¼þ´ÓËùÊö´æ´¢Æ÷¼ÓÔØµ½ËùÊöµÚÒ»´æ´¢Ä£¿éÖÐ£¬ÔÚËùÊöÒÆ¶¯Ö§¸¶Èí¼þµÄ×÷Ó…	Ö§¸¶
»ùÓÚÍâ²¿°²È«Éè±¸µÄ½»Ò×·½·¨¡¢ÏµÍ³ºÍ·þÎñÆ÷	ËÕÖÝº£²©ÖÇÄÜÏµÍ³ÓÐÏÞ¹«Ë¾	2015-04-24	2015-07-08	CN104766236A	Ö÷·ÖÀàºÅ£ºG06Q30/06(2012.01)I	ÔÚÉó-ÊµÖÊÉó²éµÄÉúÐ§	215200 ½­ËÕÊ¡ËÕÖÝÊÐÎâ½­Çø¾­¼Ã¿ª·¢ÇøÁªÑîÂ·ÒÔÄÏ£¬³¤°²Â·ÒÔ¶«£¨¿Æ¼¼´´ÒµÔ°£©	±¾·¢Ã÷Éæ¼°Ò»ÖÖ»ùÓÚÍâ²¿°²È«Éè±¸µÄ½»Ò×·½·¨¡¢ÏµÍ³ºÍ·þÎñÆ÷£¬¸Ã·½·¨°üÀ¨£º·þÎñÆ÷½ÓÊÕ°²È«½»Ò×ÐÅÏ¢£¬ÌáÈ¡½»Ò×È·ÈÏÇëÇóÐÅÏ¢·¢ËÍ¸øÒÆ¶¯Éè±¸¶Ë£»ÒÆ¶¯Éè±¸¶ËÏòÍâ²¿°²È«Éè±¸·¢ËÍ½»Ò×È·ÈÏÇëÇóÐÅÏ¢£»Íâ²¿°²È«Éè±¸Éú³ÉÇ©ÃûÐÅÏ¢£¬ÒÆ¶¯Éè±¸¶Ë½ÓÊÕÇ©ÃûÐÅÏ¢£¬²¢·¢ËÍ¸ø·þÎñÆ÷£»·þÎñÆ÷ÑéÖ¤Ç©ÃûÐÅÏ¢µÄºÏ·¨ÐÔ£¬½«È·ÈÏ½á¹û·¢ËÍ¸ø½»Ò×·¢ÆðÖÕ¶Ë¡£¸ÃÏµÍ³°üÀ¨£º½»Ò×·¢ÆðÖÕ¶Ë¡¢·þÎñÆ÷¡¢ÒÆ¶¯Éè±¸¶ËºÍÍâ²¿°²È«Éè±¸¡£¸Ã·þÎñÆ÷°üÀ¨£º½ÓÊÕµ¥Ôª¡¢·¢ËÍµ¥Ôª¡¢ÑéÖ¤µ…	°²È«
²Ù×÷Ö´ÐÐ·½·¨¼°×°ÖÃ	Ð¡Ã×¿Æ¼¼ÓÐÏÞÔðÈÎ¹«Ë¾	2015-04-27	2015-08-19	CN104850769A	Ö÷·ÖÀàºÅ£ºG06F21/31(2013.01)I	ÔÚÉó-×¨ÀûÉêÇëÈ¨¡¢×¨ÀûÈ¨µÄ×ªÒÆ	100085 ±±¾©ÊÐº£µíÇøÇåºÓÖÐ½Ö68ºÅ»ªÈóÎå²Ê³Ç¹ºÎïÖÐÐÄ¶þÆÚ13²ã	±¾¹«¿ª½ÒÊ¾ÁËÒ»ÖÖ²Ù×÷Ö´ÐÐ·½·¨¼°×°ÖÃ£¬ÊôÓÚ¿É´©´÷Ê½Éè±¸ÁìÓò¡£ËùÊö·½·¨£¬°üÀ¨£ºÔÚ¼à²âµ½Ö´ÐÐÖ§¸¶²Ù×÷ÇÒ²ÉÓÃ»ùÓÚ¿É´©´÷Ê½Éè±¸µÄÉí·ÝÈÏÖ¤·½Ê½Ê±£¬»ñÈ¡°ó¶¨µÄ¿É´©´÷Ê½Éè±¸µÄÅå´÷×´Ì¬£¬Åå´÷×´Ì¬°üÀ¨Åå´÷ÖÐ×´Ì¬ºÍÎ´Åå´÷×´Ì¬£»¼ì²âÅå´÷×´Ì¬ÊÇ·ñÎªÎ´Åå´÷×´Ì¬£»ÈôÅå´÷×´Ì¬ÎªÎ´Åå´÷×´Ì¬£¬Ôò½ûÖ¹Ö´ÐÐÖ§¸¶²Ù×÷£¬»ò£¬½«»ùÓÚ¿É´©´÷Ê½Éè±¸µÄÉí·ÝÈÏÖ¤·½Ê½¸ü»»ÎªÆäËüÉí·ÝÑéÖ¤·½Ê½¡£±¾¹«¿ª½â¾öÁËµ±ÓÃ»§Î´ËæÉíÅå´÷¿É´©´÷Ê½Éè±¸Ê±£¬»ùÓÚ¿É´©´÷Ê½Éè±¸µ…	°²È«
Ò»ÖÖ¼üÅÌ¹ÜÀí·½·¨¼°Ö§³Ö½»Ò×Ö§¸¶¹¦ÄÜµÄÒÆ¶¯ÖÕ¶Ë	ÐÂÊ¯Æ÷ÁúÂë£¨±±¾©£©¿Æ¼¼ÓÐÏÞ¹«Ë¾	2015-04-28	2015-08-12	CN104835037A	Ö÷·ÖÀàºÅ£ºG06Q20/32(2012.01)I	ÔÚÉó-ÊµÖÊÉó²éµÄÉúÐ§	100144 ±±¾©ÊÐÊ¯¾°É½Çø°Ë´ó´¦Â·22ºÅÔº¹ú·À½ÌÓýÑµÁ·»ùµØ½ÌÑ§Â¥Ìì¾ô¾Æµê6²ã6065·¿¼ä	±¾·¢Ã÷¹«¿ªÁËÒ»ÖÖÖ§³Ö½»Ò×Ö§¸¶¹¦ÄÜµÄÒÆ¶¯ÖÕ¶Ë£¬°üÀ¨£ºÖ÷´¦ÀíÆ÷£¬ÊÊÓÚÖ´ÐÐÓ¦ÓÃ£»¼üÅÌ£¬ÊÊÓÚÏìÓ¦ÓÃ»§ÊäÈë£¬²úÉú°´¼üÏûÏ¢£¬¼üÅÌ°üÀ¨ÃÜÂë¼üÅÌÇøºÍ·ÇÃÜÂë¼üÅÌÇø£¬ÆäÖÐ°´¼üÏûÏ¢°üÀ¨À´×ÔÃÜÂë¼üÅÌÇøµÄµÚÒ»°´¼üÏûÏ¢¡¢ÒÔ¼°À´×Ô·ÇÃÜÂë¼üÅÌÇøµÄµÚ¶þ°´¼üÏûÏ¢£¬²¢ÇÒ·ÇÃÜÂë¼üÅÌÇøÖ±½ÓÓëÖ÷´¦ÀíÆ÷ÏàÁ¬£»ÓëÃÜÂë¼üÅÌÇøÏàÁ¬µÄ°²È«Ð¾Æ¬£¬ÆäÖÐ°²È«Ð¾Æ¬°üÀ¨ÅÐ¶Ïµ¥ÔªºÍ¼ÓÃÜµ¥Ôª£¬ÆäÖÐÅÐ¶Ïµ¥ÔªÊÊÓÚÅÐ¶ÏÖ÷´¦ÀíÆ÷ÕýÖ´ÐÐµÄÓ¦ÓÃÊÇ·ñ´¦ÓÚ½»Ò×Ö§¸¶²Ù×÷Ä£Ê½£¬Èç¹ûÊ…	Ö§¸¶
ÐÅÓÃ¿¨¼ÓÃÜ·½·¨¼°×°ÖÃ	ÌìÂö¾ÛÔ´£¨±±¾©£©´«Ã½¿Æ¼¼ÓÐÏÞ¹«Ë¾	2015-04-29	2015-07-22	CN104794617A	Ö÷·ÖÀàºÅ£ºG06Q20/34(2012.01)I	ÔÚÉó-ÊµÖÊÉó²éµÄÉúÐ§	100007 ±±¾©ÊÐ¶«³ÇÇø°²¶¨ÃÅ¶«´ó½Ö28ºÅÓººÍ´óÏÃE×ù808ÊÒ	±¾·¢Ã÷¹«¿ªÁËÒ»ÖÖÐÅÓÃ¿¨¼ÓÃÜ·½·¨¼°×°ÖÃ£¬ÓÃÒÔ¸ù¾Ý³Ö¿¨ÈËÂ¼ÈëµÄÓïÒôÃÜÂëºÍÖ§¸¶ÕÊ»§µÄÐÅÏ¢Éú³É¶þÎ¬Âë¶ÔÐÅÏ¢¿¨½øÐÐ¼ÓÃÜ¡£ËùÊö·½·¨°üÀ¨£º°üÀ¨¶þÎ¬ÂëµÄÉú³É·½·¨£º¶Ô³Ö¿¨ÈËÂ¼ÈëµÄÓïÒôÃÜÂë½øÐÐ²ÉÑù£¬ÌáÈ¡²ÉÑùµã²¢»ñÈ¡²ÉÑùµãµÄÌØÕ÷Öµ£»¸ù¾Ý²ÉÑùµãµÄÌØÕ÷ÖµºÍÖ§¸¶ÕË»§µÄÐÅÏ¢Éú³É¶þÎ¬Âë£¬²¢½«ËùÊö¶þÎ¬ÂëÔ¤ÁôÔÚÖ§¸¶ÖÕ¶Ë¡£±¾·¢Ã÷¸Ä±äÁËÄ¿Ç°´«Í³µÄÐÅÓÃ¿¨ÃÜÂë¼ÓÇ©ÃûµÄÖ§¸¶·½Ê½£¬¸ü¼Ó±ã½ÝÇÒ°²È«ÐÔ¸ü¼Ó¿É¿¿¡£	°²È«
Ò»ÖÖÒøÐÐ×ÔÖúÖÕ¶ËÈÏÖ¤·½·¨¡¢ÏµÍ³¼°×°ÖÃ	ÖÐ¹ú¹¤ÉÌÒøÐÐ¹É·ÝÓÐÏÞ¹«Ë¾	2015-05-11	2015-08-05	CN104820944A	Ö÷·ÖÀàºÅ£ºG06Q40/02(2012.01)I	ÔÚÉó-ÊµÖÊÉó²éµÄÉúÐ§	100140 ±±¾©ÊÐÎ÷³ÇÇø¸´ÐËÃÅÄÚ´ó½Ö55ºÅ	±¾·¢Ã÷Ìá¹©ÁËÒ»ÖÖÒøÐÐ×ÔÖúÖÕ¶ËÈÏÖ¤·½·¨¡¢ÏµÍ³¼°×°ÖÃ£¬·½·¨°üÀ¨£º½«¸ù¾ÝÓÃ»§µÄÔ¤Ô¼ÇëÇóÐÅÏ¢Éú³ÉµÄÈÏÖ¤½éÖÊÐÅÏ¢·¢ËÍµ½ÓÃ»§µÄÒÆ¶¯ÖÕ¶ËÉè±¸£»½ÓÊÕÒøÐÐ×ÔÖúÖÕ¶Ë²É¼¯µÄ°²È«ÈÏÖ¤ÐÅÏ¢£¬ÆäÖÐ£¬ËùÊö°²È«ÈÏÖ¤ÐÅÏ¢°üÀ¨´ÓÓÃ»§µÄÒÆ¶¯ÖÕ¶ËÉè±¸ÉÏ²É¼¯µÄËùÊöÈÏÖ¤½éÖÊÐÅÏ¢ºÍÓÃ»§ÊäÈëµÄÈÏÖ¤ÐÅÏ¢£»¸ù¾ÝËùÊö°²È«ÈÏÖ¤ÐÅÏ¢Éú³ÉÒøÐÐ×ÔÖúÖÕ¶ËÈÏÖ¤½á¹û²¢·¢ËÍµ½ÒøÐÐ×ÔÖúÖÕ¶Ë¡£±¾·¢Ã÷Ê¹µÃÎÞ¿¨È¡ÏÖ·¶Î§¸ü¼Ó¹ã·ººÍ°²È«£¬²»ÐèÒªÍ¨¹ýÒøÐÐ¶ÌÐÅ·½Ê½±£´æÔ¤Ô¼ÎÞ¿¨È¡ÏÖµ…	°²È«
Ò»ÖÖ±£»¤¸öÈËÒþË½µÄÕ÷ÐÅÊý¾ÝÍÑÃô²É¼¯·½·¨	ÉÏº£Æ¾°²ÆóÒµÐÅÓÃÕ÷ÐÅÓÐÏÞ¹«Ë¾	2015-05-13	2015-07-29	CN104809410A	Ö÷·ÖÀàºÅ£ºG06F21/62(2013.01)I	Ê§Ð§-·¢Ã÷×¨ÀûÉêÇë¹«²¼ºóµÄ²µ»Ø	201700 ÉÏº£ÊÐ³¤ÄþÇø¹ãË³Â·33ºÅ8´±193ÊÒ	±¾·¢Ã÷¹«¿ªÁËÒ»ÖÖ±£»¤¸öÈËÒþË½µÄÕ÷ÐÅÊý¾ÝÍÑÃô²É¼¯·½·¨£¬Í¨¹ý²É¼¯ÖÕ¶Ë²É¼¯Ê¶±ðÉí·ÝÖ¤ºÅ¡¢ÊÖ»úºÅ¡¢ÓÊÏäµØÖ·»òÒøÐÐ¿¨ºÅµÈÊµÌå±êÊ¶£¬²É¼¯ÖÕ¶Ë½«ÊµÌå±êÊ¶½øÐÐÍÑÃô´¦Àí£¬½«ÊµÌå±êÊ¶Í¨¹ýÒ»ÖÖ²»¿ÉÄæµÄÃÜÂëËã·¨×ª»»ÎªÍøÂç¿Õ¼äµÄÒ»¸öÐéÄâID£¬²É¼¯ÖÕ¶Ë²É¼¯ÊµÌåÐÅÓÃÐÅÏ¢£¬½«ÐéÄâIDºÍ¶ÔÓ¦µÄÊµÌåÐÅÓÃÐÅÏ¢´«Êä¸øÕ÷ÐÅ»ú¹¹£¬Õ÷ÐÅ»ú¹¹´æ´¢ÐéÄâIDºÍ¶ÔÓ¦µÄÊµÌåÐÅÓÃÐÅÏ¢¡£±¾·¢Ã÷µÄÊý¾Ý²É¼¯·½Ê½£¬½â¾öÁË´«Í³²É¼¯·½·¨ÖÐ¸öÈËÒþË½ÈÝÒ×Ð¹Â¶µÄÎÊÌâ£¬ÔÚ±£Ö¤ÒþË…	°²È«
Ò»ÖÖ°²È«·À»¤Éè±¸µÄ²Ù×÷·½·¨¡¢ÒÆ¶¯ÖÕ¶Ë¼°°²È«·À»¤Éè±¸	¼¯âù¼ÎÊýÂë¿Æ¼¼£¨ÉîÛÚ£©ÓÐÏÞ¹«Ë¾	2015-05-13	2015-07-29	CN104809385A	Ö÷·ÖÀàºÅ£ºG06F21/32(2013.01)I	ÔÚÉó-ÊµÖÊÉó²éµÄÉúÐ§	518057 ¹ã¶«Ê¡ÉîÛÚÊÐÄÏÉ½ÇøÉîÄÏ´óµÀ9996ºÅËÉÈÕ¶¦Ê¢´óÏÃÖ÷Â¥11²ãÎ÷ÄÏ	±¾·¢Ã÷ÊµÊ©ÀýÌá¹©ÁËÒ»ÖÖ°²È«·À»¤Éè±¸µÄ²Ù×÷·½·¨£¬ÓÃÓÚÍ¨¹ýÒÆ¶¯ÖÕ¶Ë×Ô´øµÄÉúÎïÌØÕ÷Ê¶±ð¹¦ÄÜÊµÏÖ¶Ô°²È«·À»¤Éè±¸µÄ²Ù×÷¡£±¾·¢Ã÷ÊµÊ©Àý·½·¨°üÀ¨£ºÒÆ¶¯ÖÕ¶ËÏò°²È«·À»¤Éè±¸·¢ËÍ²Ù×÷Ö¸Áî£»µ±°²È«·À»¤Éè±¸½ÓÊÕµ½ÒÆ¶¯ÖÕ¶Ë·¢ËÍµÄ²Ù×÷Ö¸Áîºó£¬°²È«·À»¤Éè±¸ÅÐ¶Ï²Ù×÷Ö¸ÁîÊÇ·ñÎªºÏ·¨Ö¸Áî£¬ÈôÊÇ£¬Ôò°²È«·À»¤Éè±¸ÏòÒÆ¶¯ÖÕ¶Ë·¢ËÍÓ¦´ðÖ¸Áî£»µ±ÒÆ¶¯ÖÕ¶Ë½ÓÊÕµ½°²È«·À»¤Éè±¸·¢ËÍµÄÓ¦´ðÖ¸Áîºó£¬ÒÆ¶¯ÖÕ¶ËÉú³ÉÓÃ»§ÐÅÏ¢£¬ÓÃ»§ÐÅÏ¢ÖÐÐ¯´øÓÐÉúÎïÊ¶±ðÌØÕ÷ÐÅÏ¢£…	°²È«
°²È«ÒÆ¶¯Ö§¸¶·½·¨¡¢°²È«ÒÆ¶¯Ö§¸¶ÏµÍ³ºÍÖÕ¶Ë	ÓîÁú¼ÆËã»úÍ¨ÐÅ¿Æ¼¼£¨ÉîÛÚ£©ÓÐÏÞ¹«Ë¾	2015-05-21	2016-06-01	CN105631666A	Ö÷·ÖÀàºÅ£ºG06Q20/38(2012.01)I	ÔÚÉó-ÊµÖÊÉó²éµÄÉúÐ§	518040 ¹ã¶«Ê¡ÉîÛÚÊÐ³µ¹«ÃíÌì°²ÊýÂë³Ç´´ÐÂ¿Æ¼¼¹ã³¡B×ù8Â¥	±¾·¢Ã÷Ìá³öÁËÒ»ÖÖ°²È«ÒÆ¶¯Ö§¸¶·½·¨¡¢Ò»ÖÖ°²È«ÒÆ¶¯Ö§¸¶ÏµÍ³ºÍÒ»ÖÖÖÕ¶Ë£¬ËùÊö°²È«ÒÆ¶¯Ö§¸¶·½·¨°üÀ¨£º¸ù¾Ý½ÓÊÕµ½µÄÉèÖÃÃüÁî£¬È·¶¨ÊÇ·ñÆô¶¯ÃÜÂëÎ±×°¹¦ÄÜ£»ÔÚÈ·¶¨Æô¶¯ÃÜÂëÎ±×°¹¦ÄÜÒÔºó£¬¼ì²âÊÇ·ñ´æÔÚÐÅÏ¢ÊäÈë²Ù×÷£»ÔÚ¼ì²âµ½´æÔÚÐÅÏ¢ÊäÈë²Ù×÷Ê±£¬µ¯³öÎ±×°ÃÜÂëÊäÈë¿ò£¬ÒÔ½ÓÊÕµÚÒ»ÊäÈëÐÅÏ¢£¬²¢Êä³öµÚÒ»½á¹ûÌáÊ¾ÃÜÂë´íÎó£»¼ì²âÊÇ·ñ´æÔÚÔ¤Éè°²È«²Ù×÷£¬ÒÔ¼°¸ù¾Ý¼ì²â½á¹ûÈ·¶¨ÊÇ·ñ½øÐÐ°²È«ÒÆ¶¯Ö§¸¶¡£Í¨¹ý±¾·¢Ã÷µÄ¼¼Êõ·½°¸£¬Í¨¹ýÉèÖÃÃÜÂëÎ±×°ÊäÈ…	°²È«
»ùÓÚÐéÄâ¼üÅÌµÄ¼ÓÃÜ·½·¨¼°×°ÖÃ	ÖÐÐËÍ¨Ñ¶¹É·ÝÓÐÏÞ¹«Ë¾	2015-05-22	2017-01-04	CN106295314A	Ö÷·ÖÀàºÅ£ºG06F21/46(2013.01)I	ÔÚÉó-ÊµÖÊÉó²éµÄÉúÐ§	518057 ¹ã¶«Ê¡ÉîÛÚÊÐÄÏÉ½Çø¿Æ¼¼ÄÏÂ·55ºÅ	±¾·¢Ã÷Ìá¹©ÁËÒ»ÖÖ»ùÓÚÐéÄâ¼üÅÌµÄ¼ÓÃÜ·½·¨¼°×°ÖÃ£¬ÆäÖÐ£¬¸Ã·½·¨°üÀ¨£ºÔÚÓÃ»§Æô¶¯ÐéÄâ¼üÅÌÖ´ÐÐÐÅÏ¢ÊäÈëÊ±£¬Ëæ»úÏÔÊ¾¶àÖÖÔ¤ÉèµÄÐéÄâ¼üÅÌ×Ö·ûÐÅÏ¢²¼¾ÖÖÐµÄÒ»ÖÖ£»Í¨¹ýÔ¤Éè¹æÔò¶ÔÓÃ»§ÔÚËæ»úÏÔÊ¾µÄÐéÄâ¼üÅÌ×Ö·ûÐÅÏ¢²¼¾ÖÉÏÊäÈëµÄÐÅÏ¢½øÐÐ¼ÓÃÜ¡£Í¨¹ý±¾·¢Ã÷£¬Ê¹µÃÓÃ»§ÔÚÔÚÏßÖ§¸¶Ê±¸ü¼Ó°²È«£¬½â¾öÁËÏà¹Ø¼¼ÊõÖÐÒÆ¶¯¿Í»§¶ËÔÚÏßÖ§¸¶²»¹»°²È«µÄÎÊÌâ¡£	°²È«
Ò»ÖÖ°²È«ÈË»ú½»»¥½Ó¿ÚµÄÏµÍ³¼°ÆäÊµÏÖ·½·¨	ÄÏ¾©Ð¾¶Èµç×Ó¿Æ¼¼ÓÐÏÞ¹«Ë¾	2015-05-27	2015-08-05	CN104820573A	Ö÷·ÖÀàºÅ£ºG06F3/0488(2013.01)I	ÔÚÉó-ÊµÖÊÉó²éµÄÉúÐ§	210004 ½­ËÕÊ¡ÄÏ¾©ÊÐÇØ»´ÇøÁâ½ÇÊÐ66ºÅÄÏ¾©Ð¾¶Èµç×Ó¿Æ¼¼ÓÐÏÞ¹«Ë¾	±¾·¢Ã÷Éæ¼°Ò»ÖÖ°²È«ÈË»ú½»»¥½Ó¿ÚµÄÏµÍ³£¬°üÀ¨Ó¦ÓÃ´¦ÀíÆ÷Ä£¿é¡¢°²È«´¦ÀíÆ÷Ä£¿é¡¢Ó¦ÓÃÏÔÊ¾Í¨µÀÄ£¿é¡¢°²È«ÏÔÊ¾Í¨µÀÄ£¿é¡¢ÏÔÊ¾ÄÚ´æÄ£¿é¡¢ÏÔÊ¾µþ¼ÓÄ£¿é¡¢ÏÔÊ¾Çý¶¯Ä£¿éºÍ´¥ÃþÏÔÊ¾Ä£¿é¡£±¾·¢Ã÷»¹Éæ¼°Ò»ÖÖ°²È«ÈË»ú½»»¥½Ó¿ÚµÄÊµÏÖ·½·¨¡£±¾·¢Ã÷½«ÊÜ±£»¤µÄ°²È«´¦ÀíÄ£¿éÉú³ÉµÄ¼üÅÌÏÔÊ¾ÐÅÏ¢ÓëÍ¨ÓÃ´¦ÀíÆ÷Éú³ÉµÄÏÔÊ¾ÐÅÏ¢¸ôÀëÔËËã²¢ºÏ³ÉÏÔÊ¾¡£Í¨¹ýµþ¼ÓÏÔÊ¾·ÖÀëµÄ°²È«Í¼ÐÎ½çÃæºÍÓ¦ÓÃÍ¼ÐÎ½çÃæ£¬Ê¹µÃÓ¦ÓÃ´¦ÀíÆ÷²»ÄÜ»ñÈ¡°²È«Í¼ÐÎ½çÃæÐÅÏ¢£»ÓÃ»§¿ÉÒÔÍ¨¹…	°²È«
Ò»ÖÖÊý¾Ý×ªÒÆ·½·¨¼°Æä×°ÖÃ	¹ã¶«Å·çêÒÆ¶¯Í¨ÐÅÓÐÏÞ¹«Ë¾	2015-05-28	2015-09-09	CN104899491A	Ö÷·ÖÀàºÅ£ºG06F21/32(2013.01)I	ÓÐÐ§-ÊÚÈ¨	523860 ¹ã¶«Ê¡¶«Ý¸ÊÐ³¤°²ÕòÎÚÉ³º£±õÂ·18ºÅ	±¾·¢Ã÷ÊµÊ©Àý¹«¿ªÒ»ÖÖÊý¾Ý×ªÒÆ·½·¨¼°Æä×°ÖÃ£¬ÆäÖÐ·½·¨°üÀ¨ÈçÏÂ²½Öè£º½ÓÊÕÖÕ¶Ë·¢ËÍµÄ¶ÔÄ¿±ê×ªÒÆÁ¿µÄÊý¾ÝµÄ×ªÒÆÇëÇó£¬ËùÊö×ªÒÆÇëÇó°üº¬Ä¿±êÖÕ¶Ë±êÊ¶£¬ËùÊöÄ¿±êÖÕ¶Ë±êÊ¶¶ÔÓ¦µÄÄ¿±êÖÕ¶ËÓÃÓÚ½ÓÊÕËùÊöÄ¿±ê×ªÒÆÁ¿µÄÊý¾Ý£»¸ù¾ÝËùÊö×ªÒÆÇëÇó£¬ÏòËùÊöÖÕ¶Ë·¢ËÍÓÃÓÚÌáÊ¾²É¼¯ÉúÎïÌØÕ÷ÐÅÏ¢µÄÌáÊ¾ÐÅÏ¢£¬ÒÔÊ¹ËùÊöÖÕ¶Ë·¢ËÍËù²É¼¯µÄÊäÈëÉúÎïÌØÕ÷ÐÅÏ¢£»½ÓÊÕËùÊöÊäÈëÉúÎïÌØÕ÷ÐÅÏ¢£¬²¢»ñÈ¡ÓëËùÊöÊäÈëÉúÎïÌØÕ÷ÐÅÏ¢¶ÔÓ¦µÄÊý¾Ý×ªÒÆãÐÖµ£»µ±ËùÊöÄ¿±ê×ªÒÆÁ¿²…	°²È«
Ò»ÖÖÒÆ¶¯Ö§¸¶·½·¨¼°×°ÖÃ	ÁªÏëÒÆ¶¯Í¨ÐÅ¿Æ¼¼ÓÐÏÞ¹«Ë¾	2015-06-08	2017-01-04	CN106296188A	Ö÷·ÖÀàºÅ£ºG06Q20/38(2012.01)I	ÔÚÉó-ÊµÖÊÉó²éµÄÉúÐ§	361006 ¸£½¨Ê¡ÏÃÃÅÊÐ»ð¾æ¸ßÐÂÇøÐÅÏ¢¹âµçÔ°áªÉ½±±¶þÂ·999ºÅ	±¾·¢Ã÷Ìá¹©Ò»ÖÖÒÆ¶¯Ö§¸¶·½·¨¼°×°ÖÃ£¬Ó¦ÓÃÓÚÒ»ÒÆ¶¯ÖÕ¶Ë£¬ÒÆ¶¯ÖÕ¶ËÉèÖÃÓÐµÚÒ»¡¢µÚ¶þ²Ù×÷ÏµÍ³ÒÔ¼°¹©µÚÒ»¡¢µÚ¶þ²Ù×÷ÏµÍ³¶ÁÐ´µÄÒ»¹²Ïí´æ´¢Çø£¬µÚ¶þ²Ù×÷ÏµÍ³°²×°ÓÐÒÆ¶¯Ö§¸¶Ó¦ÓÃ£¬ÆäÖÐ·½·¨°üÀ¨£º»ñÈ¡µÚÒ»²Ù×÷ÏµÍ³ÏÂµÄÓ¦ÓÃ³ÌÐò²úÉúµÄÒÆ¶¯Ö§¸¶ÐÅÏ¢£¬½«ÒÆ¶¯Ö§¸¶ÐÅÏ¢´æ´¢µ½¹²Ïí´æ´¢Çø£¬²¢½«ÒÆ¶¯ÖÕ¶ËµÄµ±Ç°²Ù×÷ÏµÍ³ÓÉµÚÒ»²Ù×÷ÏµÍ³ÇÐ»»ÎªµÚ¶þ²Ù×÷ÏµÍ³£»ÔÚµÚ¶þ²Ù×÷ÏµÍ³ÏÂ¶ÁÈ¡ÒÆ¶¯Ö§¸¶ÐÅÏ¢£¬²¢ÀûÓÃÒÆ¶¯Ö§¸¶Ó¦ÓÃ¸ù¾ÝÒÆ¶¯Ö§¸¶ÐÅÏ¢Ö´ÐÐ¶ÔÓ¦µÄÖ§¸¶²Ù×…	Ö§¸¶
Ò»ÖÖ½ðÈÚÊý¾ÝµÄÆ¯°×·½·¨	ËÄ´¨ÓÑÁªÐÅÏ¢¼¼ÊõÓÐÏÞ¹«Ë¾	2015-06-12	2015-08-26	CN104866775A	Ö÷·ÖÀàºÅ£ºG06F21/60(2013.01)I	ÔÚÉó-ÊµÖÊÉó²éµÄÉúÐ§	610015 ËÄ´¨Ê¡³É¶¼ÊÐ¸ßÐÂÇø¸ßÅó´óµÀ5ºÅ1¶°205ºÅ	±¾·¢Ã÷¹«¿ªÁËÒ»ÖÖ½ðÈÚÊý¾ÝµÄÊý¾ÝÆ¯°×·½·¨£¬°üÀ¨ÒÔÏÂ²½Öè£º1£©²âÊÔÖÐÐÄÌá½»Êý¾ÝÐèÇó£»2£©½«Êý¾Ý´ÓÉú²ú»·¾³µÄ´ø¿â»Ö¸´µ½´ÅÅÌÉÏ£¬Í¬Ê±½«Êý¾ÝÎÄ¼þ¼ÓÔØµ½Êý¾Ý¿âÖÐ½øÐÐÊý¾Ý³éÈ¡£»3£©¸ù¾Ý²âÊÔÖÐÐÄÊý¾ÝÐèÇó½øÐÐÊý¾ÝÆ¯°×£»4£©´ýÊý¾ÝÆ¯°×Íê³Éºó½«Êý¾Ý¿âµ¼³ö³ÉÊý¾ÝÎÄ¼þ²¢½«Êý¾ÝÎÄ¼þ¼ÓÃÜºó·¢ËÍ¸ø²âÊÔÖÐÐÄ£»5£©²âÊÔÖÐÐÄ½«µÃµ½µÄÊý¾ÝÎÄ¼þ½øÐÐ×°ÔØ¡£±¾·¢Ã÷µÄ·½·¨¿É¶ÔÔÚ·ÇÉú²ú»·¾³ÖÐ½«Éæ¼°¸öÈËÒþË½»òÆäËüÐèÒª±£»¤µÄÃô¸Ð½ðÈÚÒµÎñÊý¾Ý£¬½øÐÐÒÆ³ý¡¢ÆÁ…	Êý¾Ý·ÖÎö
Ò»ÖÖ»ùÓÚÊý×ÖÇ©ÃûºÍÊ±¼ä´ÁµÄ¶þÎ¬ÂëÉí·ÝÊ¶±ð·½·¨	ÄÏ¾©ÊÐÐÅÏ¢ÖÐÐÄ	2015-06-15	2015-11-25	CN105095728A	Ö÷·ÖÀàºÅ£ºG06F21/36(2013.01)I	ÔÚÉó-ÊµÖÊÉó²éµÄÉúÐ§	210019 ½­ËÕÊ¡ÄÏ¾©ÊÐ½¨ÚþÇø½­¶«ÖÐÂ·265ºÅÐÂ³Ç´óÏÃD×ùÎåÂ¥	±¾·¢Ã÷¹«¿ªµÄÒ»ÖÖ»ùÓÚÊý×ÖÇ©ÃûºÍÊ±¼ä´ÁµÄ¶þÎ¬ÂëÉí·ÝÊ¶±ð·½·¨£¬¸ÃÊ¶±ð·½·¨½øÐÐÊý×ÖÇ©Ãû²¢¼Ó¸ÇÊ±¼ä´Á¡£ÓÉÓÚ±¾·¢Ã÷µÄÊ¶±ð·½·¨ÔÚµç×ÓÉí·ÝÊ¶±ðÖÐ²ÉÓÃÁËÊ±¼ä´Á£¬Ê¹µÃÇ©ÃûÊ±¼äµÃÒÔ¹Ì¶¨ÏÂÀ´£¬²¢ÓÃÊý×ÖÇ©ÃûÀ´±£Ö¤Ê±¼ä±ê¼ÇµÄÍêÕûÐÔÓëÕæÊµÐÔ£¬ÓÐÐ§·ÀÖ¹Ê±¼äµ¹Ç©ÐÐÎª£¬¼ÓÇ¿ÁË¶Ôµç×ÓÉí·ÝÐÅÏ¢µÄ°²È«·À·¶£¬Ò²¿ÉÒÔÎªÏà¹ØÕùÒéÌá¹©ÓÐÁ¦Ö¤¾Ý¡£¸ÃÊ¶±ð·½·¨¿ÉÊÊÓÃÓÚ»áÒéÇ©µ½¡¢ÃÅ½û¡¢Ö§¸¶µÈ³¡ºÏ¡£	°²È«
Ò»ÖÖÒÆ¶¯ÈÚºÏÖ§¸¶×°ÖÃ¡¢ÏµÍ³¼°Ö§¸¶·½·¨	ºã±¦¹É·ÝÓÐÏÞ¹«Ë¾	2015-06-17	2015-09-02	CN104881779A	Ö÷·ÖÀàºÅ£ºG06Q20/32(2012.01)I	ÔÚÉó-ÊµÖÊÉó²éµÄÉúÐ§	212355 ½­ËÕÊ¡Õò½­ÊÐµ¤ÑôÊÐºáÌÁ¹¤ÒµÇø	±¾·¢Ã÷Éæ¼°Ò»ÖÖÒÆ¶¯ÈÚºÏÖ§¸¶×°ÖÃ¡¢ÏµÍ³¼°Ö§¸¶·½·¨£¬ËùÊö×°ÖÃ°üÀ¨MCUÄ£¿é¡¢°²È«Ä£¿é¡¢Í¨Ñ¶Ä£¿é¡¢NFCÄ£¿é¡¢ÊäÈëÄ£¿é¡¢ÏÔÊ¾Ä£¿é¼°µçÔ´¹ÜÀíÄ£¿é£¬ËùÊö°²È«Ä£¿é¡¢Í¨Ñ¶Ä£¿é¡¢NFCÄ£¿é¡¢ÊäÈëÄ£¿é¡¢ÏÔÊ¾Ä£¿é¼°µçÔ´¹ÜÀíÄ£¿é¾ùÓëMCUÄ£¿éÏàÁ¬£¬ËùÊöNFCÄ£¿éÓë°²È«Ä£¿éÁ¬½Ó£¬ËùÊöÍ¨Ñ¶Ä£¿éÖÁÉÙ°üÀ¨Á½ÖÖÍ¨Ñ¶Í¨µÀ¡£±¾·¢Ã÷¾ß±¸¶à¸ö°²È«×ÓÄ£¿é¡¢¿ÉÒÔÍ¨¹ýÊµÊ©°²È«Ö§¸¶½»Ò×·½·¨¡¢µç×ÓÈÏÖ¤·½·¨ºÍ¶àÖÖ°²È«Êý¾Ý´«Êä·½Ê½£¬ÓÐÐ§µÄ±£»¤ÓÃ»§½»Ò×°²È«£»±¾·¢Ã÷ÄÜ…	°²È«
Ò»ÖÖ»ùÓÚÖ¸ÎÆÊ¶±ðµÄATM»ú°²È«²Ù×÷·½·¨¡¢ÏµÍ³¼°ATM»ú	ÉÏº£×¿Ò×¿Æ¼¼¹É·ÝÓÐÏÞ¹«Ë¾	2015-06-19	2015-10-28	CN105006077A	Ö÷·ÖÀàºÅ£ºG07F19/00(2006.01)I	ÔÚÉó-ÊµÖÊÉó²éµÄÉúÐ§	200233 ÉÏº£ÊÐÐì»ãÇø¹ðÆ½Â·391ºÅ3ºÅÂ¥20²ã	±¾·¢Ã÷¹«¿ªÁËÒ»ÖÖ»ùÓÚÖ¸ÎÆÊ¶±ðµÄATM»ú°²È«²Ù×÷·½·¨¡¢ÏµÍ³¼°ATM»ú¡£Ò»ÖÖ»ùÓÚÖ¸ÎÆÊ¶±ðµÄATM»ú°²È«²Ù×÷·½·¨°üÀ¨£¬¼ì²âµ½²åÈëÒøÐÐ¿¨£¬»ñÈ¡ÓÃ»§ÊäÈëµÄÃÜÂëºÍÊäÈëÃÜÂëÊ±ÓÃ»§²Ù×÷ÊÖÖ¸µÄÖ¸ÎÆÌØÕ÷£»ÅÐ¶ÏËùÊöÓÃ»§²Ù×÷ÊÖÖ¸µÄÖ¸ÎÆÌØÕ÷ÓëÔ¤ÏÈÂ¼ÈëµÄ¸ÃÒøÐÐ¿¨ÓÃ»§µÄÖ¸ÎÆÌØÕ÷ÊÇ·ñÆ¥Åä£¬Èô²»Æ¥Åä£¬ÔòÖ´ÐÐÍÌ¿¨²Ù×÷¡£Í¨¹ý±¾·¢Ã÷¿ÉÒÔ·ÀÖ¹·ÇÕý³£ÓÃ»§ÔÚATM»úÉÏ¶ÔÒøÐÐ¿¨½øÐÐ²Ù×÷£¬ÔöÇ¿ÒøÐÐ¿¨µÄÊ¹ÓÃ°²È«ÐÔ£¬ÍÌ¿¨ºó¿ÉÒÔÍ¨¹ýATM»úÈ¡¿¨£¬²»ÐèÒªÈ¥ÒøÐÐÈ¡¿¨£¬ÇÒ…	°²È«
Ô¶³ÌÉèÁ¢½ðÈÚÕË»§µÄÈÏÖ¤·½·¨¼°ÈÏÖ¤Éè±¸	ÒøÀí°²½ðÈÚÐÅÏ¢·þÎñ£¨±±¾©£©ÓÐÏÞ¹«Ë¾	2015-06-23	2015-09-23	CN104935440A	Ö÷·ÖÀàºÅ£ºH04L9/32(2006.01)I	ÓÐÐ§-ÊÚÈ¨	102629 ±±¾©ÊÐ´óÐËÇøÖÐ¹Ø´å¿Æ¼¼Ô°Çø´óÐËÉúÎïÒ½Ò©²úÒµ»ùµØÌìºÓÎ÷Â·28ºÅ4´±3²ã307ÊÒ	±¾·¢Ã÷ÊµÊ©ÀýÌá¹©ÁËÒ»ÖÖÔ¶³ÌÉèÁ¢½ðÈÚÕË»§µÄÈÏÖ¤·½·¨¼°ÈÏÖ¤Éè±¸£¬ÆäÖÐËùÊö·½·¨°üÀ¨»ñÈ¡Ô¶³ÌÉèÁ¢½ðÈÚÕË»§ÓÃ»§µÄÓÃ»§±êÊ¶ÐÅÏ¢£»¸ù¾ÝËùÊöÓÃ»§±êÊ¶ÐÅÏ¢»ñÈ¡ËùÊöÓÃ»§±êÊ¶Ëù¶ÔÓ¦ÓÃ»§µÄÉí·ÝÐÅÏ¢£¬ËùÊöÓÃ»§µÄÉí·ÝÐÅÏ¢°üÀ¨ÓÃ»§µÄ»ù±¾ÐÅÏ¢ºÍ/»òÓÃ»§µÄÉúÎïÐÅÏ¢£»¸ù¾ÝËùÊöÓÃ»§µÄÉí·ÝÐÅÏ¢¶ÔËùÊöÔ¶³ÌÉèÁ¢½ðÈÚÕË»§ÓÃ»§½øÐÐÈÏÖ¤£¬Èç¹ûÈÏÖ¤³É¹¦£¬ÔòÔÊÐíËùÊöÔ¶³ÌÉèÁ¢½ðÈÚÕË»§ÓÃ»§Íê³ÉÔ¶³ÌÉèÁ¢½ðÈÚÕË»§µÄ²Ù×÷¡£±¾·¢Ã÷ÊµÊ©ÀýËùÌá¹©µÄÔ¶³ÌÉèÁ¢½ðÈÚÕË»§µÄ…	°²È«
ÊÖÊÆÃÜÂëÊäÈëÉè±¸ºÍÏµÍ³£¬¼°»ùÓÚ¸ÃÏµÍ³½øÐÐ½»Ò×µÄ·½·¨	ÖÐ¹ú¹¤ÉÌÒøÐÐ¹É·ÝÓÐÏÞ¹«Ë¾	2015-06-26	2015-10-14	CN104978144A	Ö÷·ÖÀàºÅ£ºG06F3/0488(2013.01)I	ÔÚÉó-ÊµÖÊÉó²éµÄÉúÐ§	100140 ±±¾©ÊÐÎ÷³ÇÇø¸´ÐËÃÅÄÚ´ó½Ö55ºÅ	±¾·¢Ã÷Ìá¹©ÁËÒ»ÖÖÊÖÊÆÃÜÂëÊäÈëÉè±¸ºÍÏµÍ³£¬¼°»ùÓÚ¸ÃÏµÍ³½øÐÐ½»Ò×µÄ·½·¨£¬ÆäÖÐ£¬¸ÃÉè±¸°üÀ¨£º¿ÇÌå¡¢ÊÖÊÆÐÅÏ¢²É¼¯²¿¼þ¡¢Ä£Êý×ª»»Æ÷¡¢¼Ó½âÃÜÐ¾Æ¬¡¢Í¨ÐÅÐ¾Æ¬¡¢µçÔ´¡¢´æ´¢Æ÷ºÍÖÐÑë´¦ÀíÆ÷£¬Í¨¹ý¸ÃÉè±¸¿ÉÒÔÊµÏÖÊÖÊÆÃÜÂëµÄ°²È«ÊäÈë¡£¸ÃÏµÍ³°üÀ¨£ºÊÖÊÆÃÜÂëÊäÈëÉè±¸¡¢ÖÕ¶ËÉè±¸¡¢ÈÏÖ¤·þÎñÆ÷ºÍÒøÐÐ·þÎñÆ÷¡£±¾·¢Ã÷½â¾öÁËÏÖÓÐ¼¼ÊõÖÐÔÚ½»Ò×¹ý³ÌÖÐ£¬ÓÃ»§²Æ²ú°²È«ºÍÒþË½Êý¾ÝµÃ²»µ½ÓÐÐ§±£»¤µÄ¼¼ÊõÎÊÌâ£¬´ïµ½ÁËÓÐÐ§Ìá¸ßÊý¾Ý°²È«ÐÔµÄ¼¼ÊõÐ§¹û¡£	°²È«
Ò»ÖÖÊÚÈ¨ÈÏÖ¤·½·¨¡¢×°ÖÃ¼°Ïà¹ØÉè±¸	ÓîÁú¼ÆËã»úÍ¨ÐÅ¿Æ¼¼£¨ÉîÛÚ£©ÓÐÏÞ¹«Ë¾	2015-06-30	2017-01-11	CN106326705A	Ö÷·ÖÀàºÅ£ºG06F21/32(2013.01)I	ÔÚÉó-ÊµÖÊÉó²éµÄÉúÐ§	518057 ¹ã¶«Ê¡ÉîÛÚÊÐÄÏÉ½Çø¸ßÐÂ¼¼Êõ¹¤ÒµÔ°±±Çø¿áÅÉÐÅÏ¢¸Û1¶°6²ã	±¾·¢Ã÷Ìá³öÁËÒ»ÖÖÊÚÈ¨ÈÏÖ¤·½·¨¡¢×°ÖÃ¼°Ïà¹ØÉè±¸£¬¸Ã·½·¨°üÀ¨£ºµ±ÐèÒª»ñÈ¡ÊÚÈ¨ÈÏÖ¤ÐÅÏ¢Ê±£¬²É¼¯µ±Ç°Ê¹ÓÃÕßµÄÐÄµçÍ¼²¨ÐÎ½øÐÐÉí·ÝÈ·ÈÏ£»ÔÚµ±Ç°Ê¹ÓÃÕßÍ¨¹ýÉí·ÝÈ·ÈÏºó£¬½øÐÐÊÚÈ¨ÈÏÖ¤ÐÅÏ¢µÄ»ñÈ¡¡£±¾·¢Ã÷ÀûÓÃÈËÌåÐÄµçÐÅºÅµÄ²îÒìÐÔ½øÐÐÉí·ÝÈ·ÈÏ£¬¿ÉÒÔÓ¦ÓÃÔÚÊÚÈ¨Ö§¸¶ºÍÊÚÈ¨µÇÂ¼µÈ³¡ºÏ£¬±ÈÈç£ºÔÚÊÖ»ú¡¢µçÄÔµÈÍ¨ÐÅÖÕ¶ËÖ±½Ó¶ÁÈ¡ÓÃ»§Ö§¸¶¼øÈ¨ÐÅÏ¢Ö®Ç°£¬×Ô¶¯Ê¶±ðÓÃ»§ÉúÎïÌØÕ÷ÐÅÏ¢¼´ÐÄµçÍ¼²¨ÐÎ½øÐÐÉí·ÝÈ·ÈÏ£¬ÔÚÉí·ÝÈ·ÈÏÍ¨¹ýºó²ÅÄÜ¶ÁÈ¡Ö§¸¶¼øÈ¨ÐÅÏ…	°²È«
Ò»ÖÖµç×ÓÇ©Ãû×°ÖÃ	ÖØÇìÓÊµç´óÑ§ÒÆÍ¨Ñ§Ôº	2015-07-09	2015-10-21	CN104992104A	Ö÷·ÖÀàºÅ£ºG06F21/34(2013.01)I	Ê§Ð§-·¢Ã÷×¨ÀûÉêÇë¹«²¼ºóµÄÊÓÎª³·»Ø	401520 ÖØÇìÊÐÍ­ÁºÏØºÏ´¨Çø¼ÙÈÕ´óµÀ1ºÅ	±¾·¢Ã÷¹«¿ªÁËÒ»ÖÖµç×ÓÇ©Ãû×°ÖÃ£¬°üÀ¨£ºÖ÷¿ØÄ£¿é¡¢Í¼Ïñ´¦ÀíÄ£¿é¡¢ÏÔÊ¾Ä£¿é¡¢ÃÜÔ¿¹ÜÀíÄ£¿é¡¢¿ØÖÆÊäÈëÄ£¿é¡¢½»Ò×ÖÕ¶Ë¡¢°²È«Ä£¿é¼°Í¨ÐÅÄ£¿é£»Ö÷¿ØÄ£¿éÁ¬½ÓÈÏÖ¤·þÎñÆ÷¡¢Í¼Ïñ´¦ÀíÄ£¿é¡¢ÃÜÔ¿¹ÜÀíÄ£¿é¼°°²È«Ä£¿é£»Í¼Ïñ´¦ÀíÄ£¿éÁ¬½ÓÃÜÔ¿¹ÜÀíÄ£¿é¼°ÏÔÊ¾Ä£¿é£»°²È«Ä£¿éÍ¨¹ýÍ¨ÐÅÄ£¿éÁ¬½Óµç×ÓÇ©ÃûÄ£¿é£»µç×ÓÇ©ÃûÄ£¿é»¹Á¬½Ó½»Ò×ÖÕ¶Ë¼°¿ØÖÆÊäÈëÄ£¿é¡£±¾·¢Ã÷Ìá¹©Í¨¹ý¶àÖÖÍ¨ÐÅ½Ó¿Ú£¬¿ÉÒÔ¸üºÃµÄÖ§³ÖPCºÍÖÇÄÜÒÆ¶¯ÖÕ¶ËÉè±¸£¬ÓÉ´Ë¿ÉÂú×ãÎ´À´ÒÆ¶¯Ö§¸¶ÊÐ³…	°²È«
Ò»ÖÖÃæÏò½ðÈÚÁìÓòµÄ½»Ò×ÆÛÕ©¼ì²âÏµÍ³Óë·½·¨	ÏÃÃÅ¿ìÉÌÍ¨ÐÅÏ¢¼¼ÊõÓÐÏÞ¹«Ë¾	2015-07-09	2015-10-28	CN105005901A	Ö÷·ÖÀàºÅ£ºG06Q30/00(2012.01)I	ÔÚÉó-×¨ÀûÉêÇëÈ¨µÄ×ªÒÆ	361000 ¸£½¨Ê¡ÏÃÃÅÊÐË¼Ã÷Çø¼ÎºÌÂ·267ºÅ9Â¥902ÊÒBÇø	±¾·¢Ã÷¹«¿ªÒ»ÖÖÃæÏò½ðÈÚÁìÓòµÄ½»Ò×ÆÛÕ©¼ì²âÏµÍ³Óë·½·¨£¬½»Ò×ÆÛÕ©¼ì²âÏµÍ³°üÀ¨ÓÐÊµÊ±½»Ò×ÐÐÎªÊý¾Ý²É¼¯Ä£¿é¡¢ÐÐÎªÊý¾ÝÔ¤´¦ÀíÄ£¿é¡¢½»Ò×·´ÆÛÕ©Õì²âÄ£¿é¡¢ÓÃ»§½»Ò×ÐÐÎªÄ£ÐÍ¡¢Ô¤¾¯Ä£¿é¡¢ÆÛÕ©´¦ÀíÄ£¿é¡¢ÕË»§¶³½á/½â¶³Ä£¿éÒÔ¼°µç»°ÉùÎÆÊ¶±ðÄ£¿é£»½å´Ë£¬Í¨¹ýÀûÓÃµç»°ÉùÎÆÊ¶±ðÄ£¿é¶ÔÓÃ»§·¢ÆðÊµÊ±µÄÔ¶³ÌÉí·ÝÊ¶±ð£¬²¢½«Éí·ÝÊ¶±ð½á¹ûÌá½»¸øÆÛÕ©´¦ÀíÄ£¿é£¬½»ÓÉÆä×ö½øÒ»²½´¦Àí£¬Èç´Ë±¾·¢Ã÷ÈÚºÏ¾ß±¸Ô¶³ÌÉí·ÝÊ¶±ð¹¦ÄÜµÄ¸ß¼¶Éí·ÝÊ¶±ð¼¼Êõ£¬ÓÐÐ§¹æ±Ü…	°²È«
»ùÓÚÈËÁ³Ê¶±ð¡¢Ö¸ÎÆÊ¶±ðºÍºçÄ¤Ê¶±ðµÄÖ§¸¶ÏµÍ³	º«ÎÄ±ø	2015-07-10	2015-11-11	CN105046130A	Ö÷·ÖÀàºÅ£ºG06F21/32(2013.01)I	Ê§Ð§-·¢Ã÷×¨ÀûÉêÇë¹«²¼ºóµÄÊÓÎª³·»Ø	226000 ½­ËÕÊ¡ÄÏÍ¨ÊÐ³ç´¨ÇøËÕ½¨»¨Ô°8-404	±¾·¢Ã÷¹«¿ªÁËÒ»ÖÖ»ùÓÚÈËÁ³Ê¶±ð¡¢Ö¸ÎÆÊ¶±ðºÍºçÄ¤Ê¶±ðµÄÖ§¸¶ÏµÍ³£¬°üº¬·þÎñÆ÷¶ËºÍ¿Í»§¶Ë£¬ËùÊö¿Í»§¶Ë²É¼¯¿Í»§ÈËÁ³ÐÅÏ¢¡¢Ö¸ÎÆÐÅÏ¢ºÍºçÄ¤ÐÅÏ¢£¬·þÎñÆ÷¶Ô¿Í»§¶Ë²É¼¯µÄ¿Í»§ÈËÁ³ÐÅÏ¢¡¢Ö¸ÎÆÐÅÏ¢ºÍºçÄ¤ÐÅÏ¢½øÐÐ¼ÆËãºÍÊ¶±ð¡£±¾·¢Ã÷½á¹¹¼òµ¥£¬³É±¾µÍÁ®£¬Í¨¹ýÈËÁ³Ê¶±ðºÍÖ¸ÎÆÊ¶±ðÏà½áºÏ£¬´Ó¶ø½â¾öÁËµ¥Ò»ÈËÁ³Ê¶±ð×¼È·ÂÊÎÞ·¨´ïµ½100%µÄÎÊÌâ£¬Ìá¸ßÁËÊ¶±ðµÄ×¼È·ÂÊ£¬Ê¹Ö§¸¶¸ü¼ÓµÄ°²È«¡£	°²È«
Ò»ÖÖ»ùÓÚÒÆ¶¯ÖÕ¶ËµÄÖ§¸¶ÃÜÂëÊäÈë´¦Àí·½·¨¼°ÏµÍ³	TCLÒÆ¶¯Í¨ÐÅ¿Æ¼¼£¨Äþ²¨£©ÓÐÏÞ¹«Ë¾	2015-07-28	2015-10-28	CN105005893A	Ö÷·ÖÀàºÅ£ºG06Q20/32(2012.01)I	ÔÚÉó-ÊµÖÊÉó²éµÄÉúÐ§	315100 Õã½­Ê¡Äþ²¨ÊÐ¸ßÐÂÇøÑï·«Â·999Åª5ºÅ10Â¥	±¾·¢Ã÷¹«¿ªÁËÒ»ÖÖ»ùÓÚÒÆ¶¯ÖÕ¶ËµÄÖ§¸¶ÃÜÂëÊäÈë´¦Àí·½·¨¼°ÏµÍ³¡£ËùÊö·½·¨°üÀ¨£ºÔ¤ÏÈ½«ÒÆ¶¯ÖÕ¶ËµÄÖ§¸¶ÃÜÂëÐ´Èëµ½Ò»ÓëÒÆ¶¯ÖÕ¶Ë·Ö¿ªÉèÖÃµÄ´øNFC¹¦ÄÜµÄÃÜÂë±£´æµ¥ÔªÖÐ£»ËùÊöÃÜÂë±£´æµ¥ÔªÉèÖÃÔÚÒ»ÖÇÄÜ´©´÷Éè±¸ÉÏ£»µ±ÒÆ¶¯ÖÕ¶ËÐèÒªÊäÈëÖ§¸¶ÃÜÂëÊ±£¬ÒÆ¶¯ÖÕ¶Ë¿ØÖÆÆô¶¯±³ÃæµÄ½Ó½ü¼ì²â¹¦ÄÜ£»½«´øNFC¹¦ÄÜµÄÃÜÂë±£´æµ¥ÔªÌù½üËùÊöÒÆ¶¯ÖÕ¶Ë£¬µ±ÒÆ¶¯ÖÕ¶ËÓëÃÜÂë±£´æµ¥Ôª¾àÀëÔÚÒ»Ô¤¶¨·¶Î§ÄÚÊ±£¬ÒÆ¶¯ÖÕ¶Ë¿ØÖÆÆô¶¯NFC¹¦ÄÜ£»ÒÆ¶¯ÖÕ¶ËÍ¨¹ýNFC¹¦ÄÜ´ÓÃÜÂë±£´…	°²È«
Ó¦ÓÃÈÏÖ¤·½·¨¼°×°ÖÃ¡¢µç×ÓÐí¿ÉÖ¤·¢ÐÐ·½·¨¼°×°ÖÃ¡¢ÏµÍ³	ÈÕÁ¢½ðÈÚÉè±¸ÏµÍ³£¨ÉîÛÚ£©ÓÐÏÞ¹«Ë¾	2015-07-31	2017-02-15	CN106407787A	Ö÷·ÖÀàºÅ£ºG06F21/36(2013.01)I	ÔÚÉó-ÊµÖÊÉó²éµÄÉúÐ§	518103 ¹ã¶«Ê¡ÉîÛÚÊÐ±¦°²Çø¸£ÓÀ½ÖµÀºÍÆ½ÉçÇøòºÒµÂ·22ºÅÎ÷×ù	Ò»ÖÖÓ¦ÓÃÈÏÖ¤·½·¨¼°×°ÖÃ¡¢µç×ÓÐí¿ÉÖ¤·¢ÐÐ·½·¨¼°×°ÖÃ¡¢ÏµÍ³¡£ÉÏÊöÓ¦ÓÃÈÏÖ¤·½·¨£¬¶Ô×Ô¶¯½»Ò××°ÖÃµÄÓ¦ÓÃ½øÐÐÈÏÖ¤£¬ÆäÌØÕ÷ÔÚÓÚ£¬°üÀ¨£º±³¾°Í¼ÎÄ¼þ¶ÁÈ¡²½Öè£¬´ÓÉÏÊö×Ô¶¯½»Ò××°ÖÃµÄ´æ´¢²¿ÖÐ¶ÁÈ¡ÉÏÊö×Ô¶¯½»Ò××°ÖÃËùÊôµÄÒøÐÐËùÌØÓÐµÄ±³¾°Í¼ÎÄ¼þ£»ÒøÐÐ±³¾°Í¼ÌØÕ÷Öµ¼ÆËã²½Öè£¬¸ù¾ÝÉÏÊö±³¾°Í¼ÎÄ¼þ¼ÆËã³ö¸Ã±³¾°Í¼ÎÄ¼þµÄÌØÕ÷Öµ£¬×÷ÎªÒøÐÐ±³¾°Í¼ÌØÕ÷Öµ£»ÅÐ¶Ï²½Öè£¬ÅÐ¶ÏÉÏÊöÒøÐÐ±³¾°Í¼ÌØÕ÷ÖµÓëÈÏÖ¤ÓÃ±³¾°Í¼ÌØÕ÷ÖµÊÇ·ñÒ»ÖÂ£»ÒÔ¼°¿ØÖÆ²½Öè£¬ÈôÔÚÉÏÊ…	°²È«
Ò»ÖÖÈÏÖ¤·½·¨¡¢×°ÖÃ¼°ÏµÍ³	ÓîÁú¼ÆËã»úÍ¨ÐÅ¿Æ¼¼£¨ÉîÛÚ£©ÓÐÏÞ¹«Ë¾	2015-08-05	2016-06-01	CN105631667A	Ö÷·ÖÀàºÅ£ºG06Q20/38(2012.01)I	ÔÚÉó-ÊµÖÊÉó²éµÄÉúÐ§	518057 ¹ã¶«Ê¡ÉîÛÚÊÐÄÏÉ½Çø¸ßÐÂ¼¼Êõ¹¤ÒµÔ°±±Çø¿áÅÉÐÅÏ¢¸Û2¶°2²ã	±¾ÉêÇë¹«¿ªÒ»ÖÖÈÏÖ¤·½·¨¡¢×°ÖÃ¼°ÏµÍ³£¬µ±»ñµÃÖ§¸¶ÇëÇóÊ±£¬ÏòÔ¤ÏÈ°ó¶¨µÄÖÕ¶Ë·¢ËÍ¶¯Ì¬Âë£¬²¢½ÓÊÕ»ñµÃ¸Ã¶¯Ì¬ÂëµÄÖÕ¶Ë·´À¡µÄ°üº¬ÓÐÆä±êÖ¾ºÅµÄµÚÒ»±êÖ¾ÐÅÏ¢£¬µ±·þÎñÆ÷»ñµÃÓÃ»§ÊäÈëµÄ¶¯Ì¬ÂëÊ±£¬½«Éú³ÉÊ¶±ðÐÅÏ¢£¬´ËÊ±£¬ÓÃ»§¿ÉÊ¹ÓÃÖÕ¶Ë»ñÈ¡¸ÃÊ¶±ðÐÅÏ¢²¢½«Éú³ÉµÄµÚ¶þ±êÖ¾ÐÅÏ¢·´À¡¸ø·þÎñÆ÷£¬ÒÔÊ¹·þÎñÆ÷Í¨¹ýÑéÖ¤¸ÃµÚÒ»±êÖ¾ÐÅÏ¢ºÍµÚ¶þ±êÖ¾ÐÅÏ¢£¬ÅÐ¶¨»ñµÃ¶¯Ì¬ÂëµÄÖÕ¶ËÓë»ñÈ¡Ê¶±ðÐÅÏ¢µÄÖÕ¶ËÊÇÍ¬Ò»¸öÖÕ¶ËÊ±£¬²Å»áÏìÓ¦Ö§¸¶ÇëÇó£¬´Ó¶ø±ÜÃâÁË¶¯Ì¬ÂëÐ…	°²È«
·ÀÖ¹Í¨¹ýÖ÷°åÉÏµÄ°´¼ü´¥µã½øÐÐÇÔÃÜµÄ°²È«±£»¤×°ÖÃ	½­ËÕºÍÇÇ¿Æ¼¼¹É·ÝÓÐÏÞ¹«Ë¾	2015-08-12	2015-11-18	CN105069908A	Ö÷·ÖÀàºÅ£ºG07F7/02(2006.01)I	ÓÐÐ§-ÊÚÈ¨	215614 ½­ËÕÊ¡ËÕÖÝÊÐÕÅ¼Ò¸ÛÊÐ·ï»ËÕòÎ÷ÕÅÕò±±Â·20ºÅ½­ËÕºÍÇÇ¿Æ¼¼¹É·ÝÓÐÏÞ¹«Ë¾	±¾·¢Ã÷¹«¿ªÁËÒ»ÖÖ·ÀÖ¹Í¨¹ýÖ÷°åÉÏµÄ°´¼ü´¥µã½øÐÐÇÔÃÜµÄ°²È«±£»¤×°ÖÃ£¬ÔÚÖ÷°åÉÏÉèÓÐÊý×ÖÇø°´¼ü´¥µãºÍ´ø¼ì²â¼°×Ô»ÙµçÂ·µÄMCU£¬¹ø×ÐÆ¬µ¼µçÄ¤¸²¸ÇÔÚÖ÷°åÉÏ£¬ÔÚ¹ø×ÐÆ¬µ¼µçÄ¤Óë¼üÅÌÖ®¼äÉèÓÐ´øµ¼µçÒøÏßÂ·µÄ±£»¤ÏßÂ·°å£¬µ¼µçÒøÏßÂ·Á¬½ÓÔÚMCUÖÐµÄ¼ì²âµçÂ·ÖÐ£»ÔÚÖ÷°åÉÏÉèÓÐÈô¸ÉÁ¬½ÓÔÚ¼ì²âµçÂ·ÖÐµÄ±£»¤´¥µã£¬ÔÚ±£»¤ÏßÂ·°åµ×²¿ÉèÖÃÓÐÈô¸ÉÓë¸÷±£»¤´¥µã¶ÔÓ¦µÄÁ¬½Ó´¥µã£¬¼üÅÌ°²×°ºó±£»¤ÏßÂ·°åËÄÖÜ±»Ñ¹½ôÔÚÖ÷°åÉÏ£¬Ê¹¸÷Á¬½Ó´¥µã·Ö±ðÓë¸÷±£»¤´¥µãÏà½…	°²È«
Ò»ÖÖ¼ø±ðÍøÒøÖ§¸¶ÀàÄ¾ÂíµÄ·½·¨¼°ÏµÍ³	¹þ¶û±õ°²Ìì¿Æ¼¼¹É·ÝÓÐÏÞ¹«Ë¾	2015-08-13	2016-07-06	CN105740700A	Ö÷·ÖÀàºÅ£ºG06F21/53(2013.01)I	ÔÚÉó-ÊµÖÊÉó²éµÄÉúÐ§	150090 ºÚÁú½­Ê¡¹þ¶û±õÊÐ¿ª·¢ÇøÄÏ¸Ú¼¯ÖÐÇøºìÆì´ó½Ö162ºÅ506ÊÒ	±¾·¢Ã÷¹«¿ªÁËÒ»ÖÖ¼ø±ðÍøÒøÖ§¸¶ÀàÄ¾ÂíµÄ·½·¨£¬°üÀ¨£º»ùÓÚÄÚÍø»·¾³´î½¨·ÂÕæÖ§¸¶Æ½Ì¨£¬°üÀ¨£º·ÂÕæÍøÉÏÒøÐÐ»òÕß·ÂÕæµÚÈý·½Ö§¸¶Æ½Ì¨£»»ùÓÚÐéÄâ»·¾³´î½¨Ä¾ÂíÔËÐÐ»·¾³£¬²¢½«·ÃÎÊÍøÒøÖ§¸¶ÀàÆ½Ì¨µÄµØÖ·ÖØ¶¨ÏòÖÁÏà¶ÔÓ¦µÄ·ÂÕæÖ§¸¶Æ½Ì¨£»ËùÊöÄ¾ÂíÔËÐÐ»·¾³°üÀ¨£ºWindows»·¾³¡¢android»·¾³»òÕßIOS»·¾³£»ÔËÐÐÄ¾Âí³ÌÐò£¬ÀûÓÃ½Å±¾×Ô¶¯»¯Ä£ÄâÓÃ»§µÇÂ¼·ÂÕæÖ§¸¶Æ½Ì¨µÄ²Ù×÷£¬²¢¼à¿Ø»Ø´«Êý¾Ý£»·ÖÎö»Ø´«Êý¾Ý£¬µ±ÅÐ¶¨ËùÊöÄ¾Âí³ÌÐòÎªÍøÒøÖ§¸¶ÀàÄ¾ÂíÊ±£¬¼ÇÂ¼…	Ö§¸¶
µç×ÓÇ©ÃûÉè±¸	ÉîÛÚÊÐÎÄ¶¦´´Êý¾Ý¿Æ¼¼ÓÐÏÞ¹«Ë¾	2015-08-19	2015-11-18	CN105069346A	Ö÷·ÖÀàºÅ£ºG06F21/34(2013.01)I	ÓÐÐ§-ÊÚÈ¨	518000 ¹ã¶«Ê¡ÉîÛÚÊÐÄÏÉ½Çø¿Æ·áÂ·2ºÅÌØ·¢ÐÅÏ¢¸Û´óÏÃA¶°ÆßÂ¥ÄÏ701-709µ¥Ôª	±¾·¢Ã÷ÊôÓÚµç×ÓÇ©Ãû¼¼ÊõÁìÓò£¬ÓÈÆäÉæ¼°Ò»ÖÖµç×ÓÇ©ÃûÉè±¸£¬Ö¼ÔÚ½â¾öÏÖÓÐµç×ÓÇ©ÃûÉè±¸±È½ÏºñÐ¯´ø²»±ã¼°ÔÚ×°ÈëÇ®°üºóÈÝÒ×Ê¹´ÅÌõÒøÐÐ¿¨Ïû´ÅµÄ¼¼ÊõÎÊÌâ¡£¿¨Æ¬×´µÄµÚÒ»¿ÇÌå¡¢µÚÒ»ÏßÂ·°åÓëµÚÒ»½Ó¿Ú×°Åä³ÉÖ÷Ìå£¬µÚ¶þ¿ÇÌå¡¢µÚ¶þ½Ó¿ÚÓëµÚÈý½Ó¿Ú×°Åä³ÉÁ¬½ÓÍ·£¬ÔÚµÚÒ»½Ó¿ÚÓëµÚ¶þ½Ó¿ÚÏà²å½ÓÊ±£¬Á¬½ÓÍ·¹Ì¶¨Á¬½ÓÔÚÖ÷ÌåÉÏ£¬Í¬Ê±£¬µÚÈý½Ó¿ÚÍ¨¹ýµÚÒ»½Ó¿ÚÓëµÚ¶þ½Ó¿ÚµÄ×ª½ÓÓëµÚÒ»ÏßÂ·°åÍ¨ÐÅÁ¬½Ó£¬Í¨¹ý²åÉèÓÚµÚÈý½Ó¿ÚÉÏµÄÊý¾ÝÏß¿ÉÓëÖÕ¶ËÉè±¸ÏàÁ¬½ÓÊµÏÖÊ…	Ö§¸¶
Ò»ÖÖÖ§³Ö°²È«ÈÏÖ¤µÄ¿É´©´÷×°ÖÃ¼°ÈÏÖ¤·½·¨	±±¾©Ðý¼«ÐÅÏ¢¼¼Êõ¹É·ÝÓÐÏÞ¹«Ë¾	2015-08-19	2015-12-16	CN105160237A	Ö÷·ÖÀàºÅ£ºG06F21/44(2013.01)I	ÔÚÉó-ÊµÖÊÉó²éµÄÉúÐ§	100083 ±±¾©ÊÐº£µíÇø±±ËÄ»·ÖÐÂ·229ºÅº£Ì©´óÏÃ1006ÊÒ	±¾·¢Ã÷¹«¿ªÁËÒ»ÖÖÖ§³Ö°²È«ÈÏÖ¤µÄ¿É´©´÷×°ÖÃºÍÈÏÖ¤·½·¨£¬°üÀ¨£º¿ØÖÆÄ£¿é£¬ÒÔ¼°ºÍËùÊö¿ØÖÆÄ£¿éÁ¬½ÓµÄÏÔÊ¾ÆÁ¡¢ÊäÈëµçÂ·¡¢Íâ²¿½Ó¿ÚºÍÆäËûÍâÎ§µçÂ·£¬¸Ã¿ØÖÆÄ£¿é½ÓÊÕÀ´×ÔÉÏ»úÎ»µÄÊý¾Ý±¨ÎÄ£¬´ÓÊý¾Ý±¨ÎÄÖÐ»ñÈ¡ÈÏÖ¤ÇëÇóÐÅÏ¢£¬²¢Í¨¹ýÏÔÊ¾ÆÁÏÔÊ¾ÈÏÖ¤ÇëÇóÐÅÏ¢£»½ÓÊÕÀ´×ÔÊäÈëµçÂ·²É¼¯µ½µÄÊäÈëÐÅÏ¢£¬Èç¹ûÈ·ÈÏÈÏÖ¤ÇëÇóÐÅÏ¢ÕýÈ·£¬½øÐÐÈ·ÈÏÈÏÖ¤²Ù×÷£»ÔÚ¼ì²âµ½È·ÈÏÈÏÖ¤²Ù×÷ºó£¬¶ÔÈÏÖ¤È·ÈÏÐÅÏ¢½øÐÐ¼ÓÃÜ´¦Àí²¢·´À¡¸øÉÏÎ»»ú¡£Í¨¹ý±¾·¢Ã÷£¬ÄÜ¹»ÓÐÐ§±£Ö¤¿…	°²È«
Ö¸ÎÆÊ¶±ð·½·¨¼°×°ÖÃ	Ð¡Ã×¿Æ¼¼ÓÐÏÞÔðÈÎ¹«Ë¾	2015-08-21	2017-05-24	CN106709399A	Ö÷·ÖÀàºÅ£ºG06K9/00(2006.01)I	ÔÚÉó-ÊµÖÊÉó²éµÄÉúÐ§	100085 ±±¾©ÊÐº£µíÇøÇåºÓÖÐ½Ö68ºÅ»ªÈóÎå²Ê³Ç¹ºÎïÖÐÐÄ¶þÆÚ13²ã	±¾¹«¿ªÊÇ¹ØÓÚÒ»ÖÖÖ¸ÎÆÊ¶±ð·½·¨¼°×°ÖÃ£¬ÆäÖÐ£¬Ö¸ÎÆÊ¶±ð·½·¨°üÀ¨£º»ñÈ¡Ö¸ÎÆÍ¼Ïñ£¬²¢ÌáÈ¡Ö¸ÎÆÍ¼ÏñµÄÌØÕ÷ÐÅÏ¢£»»ñµÃµ±Ç°Ó¦ÓÃ»·¾³ÐÅÏ¢£¬²¢¸ù¾Ýµ±Ç°Ó¦ÓÃ»·¾³ÐÅÏ¢»ñµÃÖ¸ÎÆÑéÖ¤°²È«µÈ¼¶¶ÔÓ¦µÄÌØÕ÷ãÐÖµ£»½«ÌáÈ¡µÄÌØÕ÷ÐÅÏ¢ÓëÔ¤´æµÄÑéÖ¤ÌØÕ÷ÐÅÏ¢½øÐÐ±È¶Ô£¬Èô±È¶Ô½á¹û´ïµ½¶ÔÓ¦µÄÌØÕ÷ãÐÖµ£¬ÔòÖ¸ÎÆÊ¶±ð³É¹¦£¬Èô±È¶Ô½á¹ûÎ´´ïµ½¶ÔÓ¦µÄÌØÕ÷ãÐÖµ£¬ÔòÖ¸ÎÆÊ¶±ðÊ§°Ü¡£±¾¹«¿ªÊµÊ©Àý£¬Í¨¹ý»ñµÃµ±Ç°Ó¦ÓÃ»·¾³ÐÅÏ¢£¬²¢¸ù¾Ýµ±Ç°Ó¦ÓÃ»·¾³ÐÅÏ¢»ñµÃÖ¸ÎÆÑéÖ¤°²È«µ…	°²È«
Ó¦ÓÃÓÚµç¶¯³µ³äµç×®µÄÈËÌåÖ¸ÎÆÖ§¸¶ÏµÍ³¼°Æä·½·¨	ê»À¤ÄÜÔ´¿Æ¼¼£¨ÉÏº££©ÓÐÏÞ¹«Ë¾	2015-08-24	2015-12-23	CN105186604A	Ö÷·ÖÀàºÅ£ºH02J7/00(2006.01)I	ÓÐÐ§-ÊÚÈ¨	201821 ÉÏº£ÊÐ¼Î¶¨Çø¼Î¶¨¹¤ÒµÇøÒ¶³ÇÂ·1630ºÅ8´±10401ÊÒ	Ò»ÖÖÓ¦ÓÃÓÚµç¶¯³µ³äµç×®µÄÈËÌåÖ¸ÎÆÖ§¸¶ÏµÍ³£¬Æä°üÀ¨³äµç×®Ö÷Ìå¡¢³äµç»úÖ÷Ìå¡¢³äµç×®ºóÌ¨·þÎñÆ÷ÒÔ¼°µÚÈý·½Ö§¸¶·þÎñÆ÷£º³äµç×®Ö÷Ìå·Ö±ðÓë³äµç×®ºóÌ¨·þÎñÆ÷¡¢³äµç»úÖ÷ÌåµçÁ¬½Ó£»³äµç×®ºóÌ¨·þÎñÆ÷½ÓÈëµÚÈý·½Ö§¸¶·þÎñÆ÷£»³äµç»úÖ÷Ìå½ÓÈëµçÍø£»³äµç»úÖ÷ÌåÓÃÓÚ½«µçÍøµÄµçÄÜ×ª»¯Îªµç¶¯³µµç³Ø³äµçµÄµçÄÜ£»³äµç×®ºóÌ¨·þÎñÆ÷ÓÃÓÚ´æ´¢ÓÃ»§µÄÕË»§ÐÅÏ¢£¬Í¨¹ýµÚÈý·½Ö§¸¶·þÎñÆ÷½øÐÐ³äµçµç·Ñ½áËãÒÔ¼°¼à¿Ø³äµç×®ÏÖ³¡£»µÚÈý·½Ö§¸¶·þÎñÆ÷ÓÃÓÚµÚÈý·½Ö§¸…	Ö§¸¶
½ðÈÚÖÇÄÜÖÕ¶Ë¼°Æä°²È«»úÖÆ	ÉîÛÚÊÐÖ¤Í¨µç×Ó¹É·ÝÓÐÏÞ¹«Ë¾	2015-08-25	2016-06-29	CN105718813A	Ö÷·ÖÀàºÅ£ºG06F21/62(2013.01)I	ÔÚÉó-ÊµÖÊÉó²éµÄÉúÐ§	518054 ¹ã¶«Ê¡ÉîÛÚÊÐÄÏÉ½ÇøÄÏÓÍÌì°²¹¤Òµ´å°Ë×ù3Aµ¥Ôª	Ò»ÖÖ½ðÈÚÖÇÄÜÖÕ¶Ë¼°Æä°²È«»úÖÆ£¬°üÀ¨Î¢´¦ÀíÆ÷ºÍÓÉ¸ÃÎ¢´¦ÀíÆ÷ËùÔËÐÐµÄ°²×¿ÏµÍ³£¬ÆäÖÐ£¬¸ÃÎ¢´¦ÀíÆ÷¾ßÓÐ·ÀË¢»ú¹¦ÄÜ£»¸Ã°²×¿ÏµÍ³¶Ô½ðÈÚÉè±¸·â×°API½Ó¿Ú£¬¶ÔAPI½Ó¿Ú½øÐÐÈ¨ÏÞ·Ö¼¶´¦Àí£»¸Ã½ðÈÚÖÇÄÜÖÕ¶Ë»¹°üÀ¨°²È«Ð¾Æ¬£¬¸Ã°²È«Ð¾Æ¬ÓÃÓÚ¶Ô¸Ã°²×¿ÏµÍ³µÄÖ¤Êé½øÐÐÔËËã¡£±¾·¢Ã÷¿ÉÒÔÔö¼Ó½ðÈÚÐÅÏ¢µÄ°²È«ÐÔ¡£	°²È«
¶ñÒâÍøÒ³µÄ·ÀÓù·½·¨	³É¶¼ÇïÀ×¿Æ¼¼ÓÐÏÞÔðÈÎ¹«Ë¾	2015-08-26	2015-12-09	CN105138917A	Ö÷·ÖÀàºÅ£ºG06F21/56(2013.01)I	ÔÚÉó-ÊµÖÊÉó²éµÄÉúÐ§	610000 ËÄ´¨Ê¡³É¶¼ÊÐ³É»ªÇøÁúÌ¶ËÂ±¦¶úÂ·2ºÅ1¶°219ÊÒ	±¾·¢Ã÷Ìá¹©ÁËÒ»ÖÖ¶ñÒâÍøÒ³µÄ·ÀÓù·½·¨¡£¸Ã·½·¨°üÀ¨£º¼à¿Ø¿Í»§¶ËÍ¨¹ýä¯ÀÀÆ÷·¢ËÍµÄÍøÒ³·ÃÎÊÇëÇó£»½ØÈ¡ÍøÒ³·ÃÎÊÇëÇóÖÐµÄÄ¿±êÍøÖ·£»¸ù¾ÝÄ¿±êÍøÖ·ÅÐ¶ÏÄ¿±êÍøÖ·ÊÇ·ñÊôÓÚÔ¤ÉèµÄ¶ñÒâÍøÖ·Êý¾Ý¿â£»Èç¹û²»ÊôÓÚ¶ñÒâÍøÖ·Êý¾Ý¿â£¬Ôò·ÃÎÊÄ¿±êÍøÖ·¶ÔÓ¦µÄÍøÒ³£¬²¢¸ù¾ÝÍøÒ³µÄÄÚÈÝÅÐ¶ÏÍøÒ³ÊÇ·ñÎªÖ§¸¶Ò³Ãæ£»Èç¹ûÎªÖ§¸¶Ò³Ãæ£¬Ôò»ñÈ¡ÍøÒ³Ò³ÃæµÄ½ØÍ¼£¬½«½ØÍ¼·¢ËÍ¸ø¿Í»§¶Ë¹©ä¯ÀÀÆ÷ÏÔÊ¾¡£±¾·¢Ã÷ÄÜ¹»Ìá¸ß¿Í»§¶ËµÄ°²È«ÐÔ¡£	°²È«
Ò»ÖÖÊý¾Ý½»»¥µÄ·½·¨¡¢Éè±¸¼°ÏµÍ³	¹ã¶«Å·çêÒÆ¶¯Í¨ÐÅÓÐÏÞ¹«Ë¾	2015-08-26	2016-01-06	CN105224071A	Ö÷·ÖÀàºÅ£ºG06F3/01(2006.01)I	ÔÚÉó-ÊµÖÊÉó²éµÄÉúÐ§	523860 ¹ã¶«Ê¡¶«Ý¸ÊÐ³¤°²ÕòÎÚÉ³º£±õÂ·18ºÅ	±¾·¢Ã÷ÊµÊ©Àý¹«¿ªÁËÒ»ÖÖÊý¾Ý½»»¥µÄ·½·¨¡¢Éè±¸¼°ÏµÍ³¡£ÆäÖÐ£¬Ò»ÖÖÊý¾Ý½»»¥µÄ·½·¨£¬°üÀ¨£ºÖÇÄÜÊÖ±í½ÓÊÕ·þÎñÆ÷·¢ËÍµÄÓÃÓÚÇëÇó×ªÒÆÊý¾Ý×ÊÔ´µÄ×ªÒÆÇëÇó£»ËùÊöÖÇÄÜÊÖ±í»ñÈ¡ÓÃ»§Í¨¹ýËùÊöÖÇÄÜÊÖ±íµÄ±í¹ÚÊäÈëµÄ²Ù×÷Êý¾Ý£»ËùÊöÖÇÄÜÊÖ±íÏòËùÊö·þÎñÆ÷·¢ËÍËùÊö²Ù×÷Êý¾ÝÒÔÏìÓ¦ËùÊö×ªÒÆÇëÇó£»ÔÚËùÊö·þÎñÆ÷¶ÔËùÊö²Ù×÷Êý¾Ý½øÐÐÑéÖ¤ÇÒÑéÖ¤½á¹ûÎª³É¹¦µÄÇé¿öÏÂ£¬ËùÊöÖÇÄÜÊÖ±í½ÓÊÕËùÊö·þÎñÆ÷·¢ËÍµÄÊý¾Ý×ÊÔ´×ªÒÆ³É¹¦µÄÌáÊ¾ÐÅÏ¢¡£²ÉÓÃ±¾·¢Ã÷ÊµÊ©ÀýÖÇÄÜÊÖ±…	°²È«
ÓÃÓÚÖÕ¶ËµÄÒÆ¶¯Ö§¸¶·½·¨¼°×°ÖÃ	ÓîÁú¼ÆËã»úÍ¨ÐÅ¿Æ¼¼£¨ÉîÛÚ£©ÓÐÏÞ¹«Ë¾	2015-08-27	2015-12-23	CN105184562A	Ö÷·ÖÀàºÅ£ºG06Q20/32(2012.01)I	ÔÚÉó-¹«¿ª	518040 ¹ã¶«Ê¡ÉîÛÚÊÐ³µ¹«ÃíÌì°²ÊýÂë³Ç´´ÐÂ¿Æ¼¼¹ã³¡B×ù8Â¥	±¾·¢Ã÷Ìá¹©ÁËÒ»ÖÖÓÃÓÚÖÕ¶ËµÄÒÆ¶¯Ö§¸¶·½·¨¼°×°ÖÃ£¬ÆäÖÐ£¬ËùÊöÓÃÓÚÖÕ¶ËµÄÒÆ¶¯Ö§¸¶·½·¨°üÀ¨£ºÔÚÓÃ»§Í¨¹ýÒÆ¶¯Ö§¸¶³É¹¦Ê±£¬¼ÇÂ¼ËùÊöÒÆ¶¯Ö§¸¶µÄµÇÂ¼ÑéÖ¤ÐÅÏ¢£»Èô¼ì²âµ½ÓÃ»§ÐèÒªÔÙ´Î½øÐÐÒÆ¶¯Ö§¸¶£¬ÔòÅÐ¶Ï¼ÇÂ¼ËùÊöµÇÂ¼ÑéÖ¤ÐÅÏ¢µÄÊ±³¤ÊÇ·ñ´ïµ½µÚÒ»Ô¤¶¨Ê±³¤£¬ºÍ/»òÅÐ¶Ï¾àÀëÉÏ´Î½øÐÐÒÆ¶¯Ö§¸¶µÄÊ±³¤ÊÇ·ñ´ïµ½µÚ¶þÔ¤¶¨Ê±³¤£»ÔÚÅÐ¶¨¼ÇÂ¼ËùÊöµÇÂ¼ÑéÖ¤ÐÅÏ¢µÄÊ±³¤Î´´ïµ½ËùÊöµÚÒ»Ô¤¶¨Ê±³¤Ê±£¬ºÍ/»òÔÚÅÐ¶¨¾àÀëÉÏ´Î½øÐÐÒÆ¶¯Ö§¸¶µÄÊ±³¤Î´´ïµ½ËùÊöµÚ¶þÔ¤¶…	Ö§¸¶
Ò»ÖÖÉí·ÝÊ¶±ð·½·¨¡¢×°ÖÃ¼°ÏµÍ³	¾©¶«·½¿Æ¼¼¼¯ÍÅ¹É·ÝÓÐÏÞ¹«Ë¾	2015-09-08	2015-12-23	CN105184136A	Ö÷·ÖÀàºÅ£ºG06F21/32(2013.01)I	Ê§Ð§-·¢Ã÷×¨ÀûÉêÇë¹«²¼ºóµÄ²µ»Ø	100015 ±±¾©ÊÐ³¯ÑôÇø¾ÆÏÉÇÅÂ·10ºÅ	±¾·¢Ã÷µÄÊµÊ©ÀýÌá¹©Ò»ÖÖÉí·ÝÊ¶±ð·½·¨¡¢×°ÖÃ¼°ÏµÍ³£¬Éæ¼°Éí·ÝÊ¶±ð¼¼ÊõÁìÓò£¬¿ÉÒ»¶¨³Ì¶È±ÜÃâÉí·ÝÊ¶±ð¹ý³ÌÖÐÓÃ»§ÐÅÏ¢·¢ÉúÐ¹Â¶£¬Ìá¸ßÉí·ÝÊ¶±ðµÄ°²È«ÐÔ¡£¸Ã·½·¨°üÀ¨£º·¢ËÍ¶Ë²É¼¯´ýÊ¶±ðÓÃ»§µÄÉí·ÝÌØÕ÷ÐÅÏ¢£¬ËùÊöÉí·ÝÌØÕ÷ÐÅÏ¢ÓÃÓÚÎ¨Ò»±êÊ¶ËùÊö´ýÊ¶±ðÓÃ»§µÄÉí·Ý£»ËùÊö·¢ËÍ¶Ë½«ËùÊöÉí·ÝÌØÕ÷ÐÅÏ¢×ª»¯Êý×ÖÐÅºÅ£»ËùÊö·¢ËÍ¶ËÍ¨¹ýÎÞÏß·½Ê½½«ËùÊöÊý×ÖÐÅºÅ·¢ËÍÖÁ½ÓÊÕ¶Ë£¬ÒÔÊ¹µÃËùÊö½ÓÊÕ¶Ë´ÓËùÊöÊý×ÖÐÅºÅÖÐÌáÈ¡ËùÊö´ýÊ¶±ðÓÃ»§µÄÉí·ÝÌØÕ÷ÐÅÏ¢£¬²¢¸ù¾…	°²È«
Ò»ÖÖÉí·Ý¼ø±ðµÄ·½·¨¡¢×°ÖÃ¼°ÖÕ¶Ë	ÖÐÐËÍ¨Ñ¶¹É·ÝÓÐÏÞ¹«Ë¾	2015-09-09	2017-03-22	CN106529243A	Ö÷·ÖÀàºÅ£ºG06F21/32(2013.01)I	ÔÚÉó-ÊµÖÊÉó²éµÄÉúÐ§	518057 ¹ã¶«Ê¡ÉîÛÚÊÐÄÏÉ½Çø¸ßÐÂ¼¼Êõ²úÒµÔ°¿Æ¼¼ÄÏÂ·ÖÐÐËÍ¨Ñ¶´óÏÃ·¨Îñ²¿	±¾·¢Ã÷ÊµÊ©Àý¹«¿ªÁËÒ»ÖÖÉí·Ý¼ø±ðµÄ·½·¨£¬ÀûÓÃÉãÏñÍ·²É¼¯ÓÃ»§µÄÉí·ÝÊ¶±ðÐÅÏ¢£¬ËùÊöÉí·ÝÊ¶±ðÐÅÏ¢ÓÃÓÚ±íÕ÷ÓÃ»§×ÔÉí²»¿ÉÌæ´úµÄÉúÀíÌØÕ÷ÐÅÏ¢£»½«²É¼¯µÄÉí·ÝÊ¶±ðÐÅÏ¢ÓëÔ¤ÏÈ´æ´¢µÄÉí·ÝÊ¶±ðÐÅÏ¢½øÐÐÆ¥ÅäµÃµ½Æ¥Åä½á¹û£»µ±ËùÊöÆ¥Åä½á¹û±íÃ÷ËùÊö²É¼¯µÄÉí·ÝÊ¶±ðÐÅÏ¢ÓëÔ¤ÏÈ´æ´¢µÄÉí·ÝÊ¶±ðÐÅÏ¢Æ¥ÅäÊ±£¬È·ÈÏËùÊöÓÃ»§µÄÉí·Ý¡£	°²È«
Ò»ÖÖÃÜÂëÊäÈëÆ÷	¼ÃÄÏ±ÈÂÞ´ÄÐÅÏ¢¿Æ¼¼ÓÐÏÞ¹«Ë¾	2015-09-09	2015-12-16	CN105160763A	Ö÷·ÖÀàºÅ£ºG07F7/02(2006.01)I	Ê§Ð§-·¢Ã÷×¨ÀûÉêÇë¹«²¼ºóµÄÊÓÎª³·»Ø	250031 É½¶«Ê¡¼ÃÄÏÊÐÌìÇÅÇøÃûÈª´ºÏþ¶þÆÚ¹¤³ÌA1µØ¿é¹«½¨15²ã1520	Ò»ÖÖÃÜÂëÊäÈëÆ÷£¬°üÀ¨Íâ¿Ç£¬Íâ¿ÇÒ»¶ËÉèÖÃ¹¦ÄÜ¼üÅÌºÍÊý×Ö¼üÅÌ£¬Íâ¿Çºó¶ËÉèÖÃ½ØÃæÎª¿òÐÍµÄÕÚµ²ºÐ£¬Íâ¿Ç²à²¿¿ªÉèµ¼Ïò²Û£¬µ¼Ïò²ÛÓëÕÚµ²ºÐµÄµ×°åÅäºÏ¡£±¾·¢Ã÷ÔÚÊäÈëÃÜÂëÇ°£¬Ê¹ÓÃÕß¹Û²ìÊý×Ö¼üÅÌµÄÎ»ÖÃ£¬ÔÙ½«ÕÚµ²ºÐ»¬¶¯ÔÚÊý×Ö¼üÅÌµÄÉÏ²¿£¬Ê¹ÓÃÕß½«ÊÖÉìÈëÕÚµ²ºÐÄÚ½øÐÐÃÜÂëÊäÈë£¬±ÜÃâÍµ¿ú£¬ÓÐÐ§±£»¤Ê¹ÓÃÕßµÄ½ðÈÚ°²È«¡£	°²È«
Ò»ÖÖ½ðÈÚÐ¾Æ¬¿¨¼°»ùÓÚ½ðÈÚÐ¾Æ¬¿¨µÄÈ¨ÏÞ¿ØÖÆ·½·¨	ÄÏ²ýÅ··ÆÉúÎïÊ¶±ð¼¼ÊõÓÐÏÞ¹«Ë¾	2015-09-14	2015-12-02	CN105117634A	Ö÷·ÖÀàºÅ£ºG06F21/32(2013.01)I	ÔÚÉó-ÊµÖÊÉó²éµÄÉúÐ§	330029 ½­Î÷Ê¡ÄÏ²ýÊÐ¸ßÐÂÇø¾©¶«´óµÀ1189ºÅ	±¾·¢Ã÷¹«¿ªÁËÒ»ÖÖ½ðÈÚÐ¾Æ¬¿¨¼°»ùÓÚ½ðÈÚÐ¾Æ¬¿¨µÄÈ¨ÏÞ¿ØÖÆ·½·¨£¬½ðÈÚÐ¾Æ¬¿¨°üÀ¨£º°üÀ¨·â×°ÔÚ¿¨ÌåÄÚµÄÖ¸ÎÆÊ¶±ðÄ£¿é¡¢ÖÐÑë´¦ÀíÆ÷CPUÄ£¿é¡¢´æ´¢Ä£¿éÒÔ¼°Êä³öÄ£¿é£»Ö¸ÎÆÊ¶±ðÄ£¿éÓÃÓÚ²É¼¯²Ù×÷ÕßµÄÖ¸ÎÆÐÅÏ¢²¢´«ËÍÖÁCPUÄ£¿é£»CPUÄ£¿éÓÃÓÚ½«²É¼¯µÄÖ¸ÎÆÐÅÏ¢ÓëÔ¤´æ´¢µÄÖ¸ÎÆÐÅÏ¢½øÐÐÆ¥ÅäÅÐ¶Á£¬²¢½«ÅÐ¶Á½á¹û·¢ËÍÖÁÊä³öÄ£¿é£»Êä³öÄ£¿éÓÃÓÚ½«ÅÐ¶Á½á¹û´«ËÍÖÁÓëÊä³öÄ£¿éÏà¶ÔÓ¦µÄ½ÓÊÕÆ÷£¬ÒÔÊ¹°üº¬½ÓÊÕÆ÷µÄ²»Í¬µÄÖÕ¶ËÉè±¸·Ö±ð¸³Óè½ðÈÚÐ¾Æ¬¿¨¾ß±¸²»Í¬µÄ…	°²È«
Ò»ÖÖÐÅÏ¢´¦Àí·½·¨ºÍÖÕ¶ËÉè±¸	ÖÐÐËÍ¨Ñ¶¹É·ÝÓÐÏÞ¹«Ë¾	2015-09-15	2017-03-22	CN106529244A	Ö÷·ÖÀàºÅ£ºG06F21/32(2013.01)I	ÔÚÉó-ÊµÖÊÉó²éµÄÉúÐ§	518057 ¹ã¶«Ê¡ÉîÛÚÊÐÄÏÉ½Çø¸ßÐÂ¼¼Êõ²úÒµÔ°¿Æ¼¼ÄÏÂ·ÖÐÐËÍ¨Ñ¶´óÏÃ·¨Îñ²¿	±¾·¢Ã÷ÊµÊ©Àý¹«¿ªÁËÒ»ÖÖÐÅÏ¢´¦Àí·½·¨£¬Ó¦ÓÃÓÚÖÕ¶ËÉè±¸£¬ËùÊöÖÕ¶ËÉè±¸°üÀ¨¾ßÓÐ²»¿ÉÄæµÄÎïÀí¸Ä±äµÄ±£ÏÕÆ÷£¬µ±ËùÊöÖÕ¶ËÉè±¸¿ªÆôÊ±£¬ËùÊö·½·¨°üÀ¨£º»ñÈ¡ËùÊö±£ÏÕÆ÷µÄ×´Ì¬£»ËùÊö±£ÏÕÆ÷µÄ×´Ì¬ÊÇ¿ªÆôÊ±£¬Éú³É²¢ÏÔÊ¾ÊäÈëÃÜÂëÐÅÏ¢µÄµÚÒ»ÌáÊ¾ÐÅÏ¢£»½ÓÊÕËùÊöÓÃ»§ÊäÈëµÄÃÜÂëÐÅÏ¢£»ËùÊöÃÜÂëÐÅÏ¢ºÍÓ²¼þ´æ´¢µÄÔ¤ÉèÃÜÂëÐÅÏ¢²»Í¬Ê±£¬½øÈë¹Ø»ú×´Ì¬¡£±¾·¢Ã÷ÊµÊ©Àý»¹Í¬Ê±¹«¿ªÁËÒ»ÖÖÖÕ¶ËÉè±¸¡£	±£ÏÕ
Ò»ÖÖÊý¾Ý´¦Àí·½·¨¼°Æä×°ÖÃ	ÖÐ¹úÒøÁª¹É·ÝÓÐÏÞ¹«Ë¾	2015-09-17	2016-09-21	CN105956481A	Ö÷·ÖÀàºÅ£ºG06F21/62(2013.01)I	ÔÚÉó-ÊµÖÊÉó²éµÄÉúÐ§	200135 ÉÏº£ÊÐÆÖ¶«ÐÂÇøº¬Ð¦Â·36ºÅ	±¾·¢Ã÷¹«¿ªÁËÒ»ÖÖÊý¾Ý´¦Àí·½·¨¼°Æä×°ÖÃ£¬¸Ã·½·¨°üÀ¨£º»ñÈ¡¿Í»§¶Ë·¢ËÍµÄÊý¾Ý¿â´¦ÀíÃüÁî¼¯ºÏ£¬²¢ÒÀ¾ÝÊý¾Ý¿â±êÊ¶ÐÅÏ¢½«ËùÊöÊý¾Ý¿â´¦ÀíÃüÁî·Ö³É¶à¸öÊý¾Ý¿â´¦Àí×ÓÃüÁî£»¸ù¾ÝËùÊö×ÓÃüÁîÖÐµÄÊý¾Ý¿â±êÊ¶ÐÅÏ¢ºÍÊý¾Ý¿â·þÎñÆ÷µÄ¶ÔÓ¦¹ØÏµ£¬È·¶¨Ã¿ÌõÊý¾Ý¿â´¦Àí×ÓÃüÁîÖÐµÄÊý¾Ý¿â±êÊ¶ÐÅÏ¢¶ÔÓ¦µÄÊý¾Ý¿â·þÎñÆ÷£»½«ËùÊöÊý¾Ý¿â´¦Àí×ÓÃüÁî·Ö±ð·¢ËÍ¸ø¶ÔÓ¦µÄÊý¾Ý¿â·þÎñÆ÷£»½ÓÊÕÃ¿¸öËùÊöÊý¾Ý¿â·þÎñÆ÷·µ»ØµÄÊý¾Ý´¦Àí½á¹û£¬²¢»ã×ÜËùÊöÊý¾Ý´¦Àí½á¹û·¢ËÍ¸øËùÊ…	Êý¾Ý·ÖÎö
Ò»ÖÖ»ùÓÚÒøÐÐµÄ°²È«½»Ò×ÖÕ¶Ë	¼ÎÍ¨°Âì÷¿Æ¼¼£¨Ìì½ò£©ÓÐÏÞ¹«Ë¾	2015-09-23	2015-12-09	CN105139202A	Ö÷·ÖÀàºÅ£ºG06Q20/38(2012.01)I	ÔÚÉó-¹«¿ª	301712 Ìì½òÊÐÎäÇåÇø¾©±õ¹¤ÒµÔ°¾©±õ´óµÀ19ºÅ101-60£¨¼¯ÖÐ°ì¹«Çø£©	±¾·¢Ã÷Ìá¹©ÁËÒ»ÖÖ»ùÓÚÒøÐÐµÄ°²È«½»Ò×ÖÕ¶Ë£¬°üÀ¨½»Ò×ÖÕ¶Ë¡¢¿Í»§¶Ë¡¢Í¼Ïñ²É¼¯×°ÖÃ¡¢Í¼Ïñ´¦Àí·þÎñÆ÷¡¢Ö¸ÎÆÊ¶±ð×°ÖÃ¡¢ºóÌ¨·þÎñÆ÷£»ËùÊö½»Ò×ÖÕ¶Ë¸ºÔð¸÷Ä£¿éÖ®¼äµÄÍ¨ÐÅ£¬ÓëËùÊö¿Í»§¶Ë¡¢Í¼Ïñ²É¼¯×°ÖÃ¡¢Í¼Ïñ´¦Àí·þÎñÆ÷¡¢Ö¸ÎÆÊ¶±ð×°ÖÃ¡¢ºóÌ¨·þÎñÆ÷Á¬½Ó¡£±¾·¢Ã÷ÀûÓÃÉãÏñÍ·Í¨¹ý²É¼¯ÓÃ»§Í¼Ïñ£¬»ñµÃÓÃ»§Í¼Ïñ£¬²¢ÇÒÌáÈ¡ºçÄ¤ÐÅÏ¢½øÐÐÉí·ÝµÄ¼ÇÂ¼£¬²¢Í¨¹ýÖ¸ÎÆÊ¶±ðÆ÷½øÐÐ½»Ò×ÈÏÖ¤£¬ÀûÓÃË«ÖØ°²È«ÈÏÖ¤µÄ·½Ê½¶Ô½»Ò×¹ý³Ì½øÐÐ¹ÜÀí£¬ÓÐÐ§µÄÌá¸ßÁË½»Ò×µÄ°²È…	°²È«
Ò»ÖÖÉÌÒµÒøÐÐÈí¼þµÄÖÊÁ¿·çÏÕÆÀ¹À·½·¨ºÍÏµÍ³	ÖÐ¹úÅ©ÒµÒøÐÐ¹É·ÝÓÐÏÞ¹«Ë¾	2015-09-24	2016-03-16	CN105404814A	Ö÷·ÖÀàºÅ£ºG06F21/57(2013.01)I	ÔÚÉó-ÊµÖÊÉó²éµÄÉúÐ§	100005 ±±¾©ÊÐ¶«³ÇÇø½¨¹úÃÅÄÚ´ó½Ö69ºÅ	±¾ÉêÇë¹«¿ªÁËÒ»ÖÖÉÌÒµÒøÐÐÈí¼þµÄÖÊÁ¿·çÏÕÆÀ¹À·½·¨ºÍÏµÍ³£¬¸Ã·½·¨ºÍÏµÍ³Ê×ÏÈ»ñÈ¡·´Ó³ÉÌÒµÒøÐÐÈí¼þÔÚ³öÏÖÖÊÁ¿ÎÊÌâÊ±¶ÔÒøÐÐÒµÎñ²úÉúµÄÓ°Ïì¡¢ÒÔ¼°¶ÔÏà¹ØÒµÎñÔì³ÉµÄ×î´óËðÊ§³Ì¶ÈµÄÒµÎñ·çÏÕ¹ÀÖµ£¬½ø¶ø»ñÈ¡·´Ó³ÉÌÒµÒøÐÐÈí¼þÓÉÓÚÓÃ»§µÄÐèÇó·¢Éú±ä»¯¶ø²úÉúµÄ·çÏÕµÄÐèÇó·çÏÕ¹ÀÖµ£¬»¹»ñÈ¡·´Ó³ÉÌÒµÒøÐÐÈí¼þÓÉÓÚ±¾Éí´æÔÚµÄÈ±ÏÝÔì³ÉµÄ·çÏÕµÄÈí¼þÈ±ÏÝ·çÏÕ¹ÀÖµ£»È»ºó½«ÒµÎñ·çÏÕ¹ÀÖµ¡¢ÐèÇó·çÏÕ¹ÀÖµºÍÈí¼þÈ±ÏÝ·çÏÕ¹ÀÖµ¹¹ÔìÎªÒ»¸ö¹ÀÖµÏòÁ¿£¬¸Ã¹ÀÖµÏòÁ…	Êý¾Ý·ÖÎö
Ò»ÖÖ¿¨Æ¬¸öÈË»¯Êý¾Ý´¦Àí×°ÖÃ¼°·½·¨	½ð°î´ïÓÐÏÞ¹«Ë¾	2015-09-30	2016-03-09	CN105391541A	Ö÷·ÖÀàºÅ£ºH04L9/00(2006.01)I	ÔÚÉó-ÊµÖÊÉó²éµÄÉúÐ§	519070 ¹ã¶«Ê¡Öéº£ÊÐÇ°É½¸£Ïª½ð°î´ï¹¤ÒµÔ°	±¾·¢Ã÷ÊµÊ©ÀýÌá¹©Ò»ÖÖ¿¨Æ¬¸öÈË»¯µÄÊý¾Ý´¦Àí·½·¨£¬°üÀ¨ÈçÏÂ²½Öè£º(1)Æ½Ì¨Êý¾Ý¿âÖÐÐÄ½ÓÊÕ¿Í»§Êý¾Ý£¬²¢¸ù¾ÝËùÊö¸ù¾ÝÊý¾ÝÅÐ¶Ï¿Í»§ÀàÐÍ£»(2)¸ù¾ÝËùÊö¿Í»§ÀàÐÍÔÚÆ½Ì¨Êý¾Ý¿âÖÐÐÄ»ñÈ¡ÏàÓ¦µÄ·Ö²¼Ê½¿Í»§Êý¾Ý¿âµØÖ·ºÍÓÃ»§ÃûÐÅÏ¢£»(3)ËùÊöÓÃ»§ÃûÐÅÏ¢¾­¹ýÃÜÔ¿¹ÜÀíÏµÍ³ÑéÖ¤ºó£¬½«ËùÊö¿Í»§Êý¾ÝÁ´½Óµ½ËùÊöÏàÓ¦µÄ·Ö²¼Ê½¿Í»§Êý¾Ý¿â£»(4)ÔÚËùÊöÏàÓ¦µÄ·Ö²¼Ê½¿Í»§Êý¾Ý¿â½øÐÐ¿Í»§Êý¾ÝµÄÐ´ÈëºÍ¶ÁÈ¡¡£ÏàÓ¦µÄ»¹Ìá¹©Ò»ÖÖ¿¨Æ¬¸öÈË»¯Êý¾Ý´¦Àí×°ÖÃ£¬°üÀ¨Æ½Ì¨Êý¾…	°²È«
°²È«Ö§¸¶ÉèÖÃ·½·¨¡¢ÏµÍ³¼°µç×ÓÖÕ¶Ë	ÉÏº£ì³Ñ¶Êý¾ÝÍ¨ÐÅ¼¼ÊõÓÐÏÞ¹«Ë¾	2015-09-30	2016-01-20	CN105260637A	Ö÷·ÖÀàºÅ£ºG06F21/32(2013.01)I	ÓÐÐ§-ÊÚÈ¨	201616 ÉÏº£ÊÐËÉ½­ÇøË¼ÏÍÂ·3666ºÅ	±¾·¢Ã÷Ìá¹©°²È«Ö§¸¶ÉèÖÃ·½·¨¡¢ÏµÍ³¼°µç×ÓÖÕ¶Ë£¬ÔÚµç×ÓÖÕ¶ËÏÔÊ¾Ö¸ÎÆÉèÖÃ½çÃæ£¬ÆäÖÐ£¬ËùÊöÖ¸ÎÆÉèÖÃ½çÃæÓÃÓÚ¹©ÈË»ú½»»¥ÒÔ¶ÔËùÊöµç×ÓÖÕ¶ËÖÐ´æ´¢µÄÖ¸ÎÆÐÅÏ¢½øÐÐ¹ÜÀí£»ÔÚËùÊöÖ¸ÎÆÉèÖÃ½çÃæÌá¹©£ºÓÃÓÚ´´½¨»òÕß´ÓËùÊöÖ¸ÎÆÐÅÏ¢ÖÐÖ¸¶¨Ö§¸¶Ö¸ÎÆµÄ²Ù×÷¹¦ÄÜ£¬ËùÊöÖ§¸¶Ö¸ÎÆ×÷ÎªÍ¨¹ýËùÊöµç×ÓÖÕ¶Ë½øÐÐµç×ÓÖ§¸¶µÄÎ¨Ò»ÑéÖ¤Ö¸ÎÆ£»Ïà±ÈÓÚÏÖÓÐ¼¼Êõ£¬±¾°¸½«ÔÊÐíÖ§¸¶µÄÌõ¼þÏÞÖÆÎªÎ¨Ò»Ö¸¶¨Ö¸ÎÆ£¬´ó´óÌáÉýÖ§¸¶µÄ°²È«ÐÔ¡£	°²È«
Ò»ÖÖ¶à²Ù×÷ÏµÍ³¼äµÄÇÐ»»·½·¨¼°ÖÕ¶ËÉè±¸	Î¬ÎÖÒÆ¶¯Í¨ÐÅÓÐÏÞ¹«Ë¾	2015-09-30	2016-08-03	CN105825149A	Ö÷·ÖÀàºÅ£ºG06F21/74(2013.01)I	ÔÚÉó-ÊµÖÊÉó²éµÄÉúÐ§	523860 ¹ã¶«Ê¡¶«Ý¸ÊÐ³¤°²ÕòÎÚÉ³²½²½¸ß´óµÀ283ºÅ	±¾·¢Ã÷Ìá¹©ÁËÒ»ÖÖ¶à²Ù×÷ÏµÍ³¼äµÄÇÐ»»·½·¨¼°ÖÕ¶ËÉè±¸£¬¶à²Ù×÷ÏµÍ³ÖÐ°üÀ¨°²×°ÓÐÖ§¸¶Ó¦ÓÃµÄÖ§¸¶ÏµÍ³£¬¸Ã·½·¨°üÀ¨£ºµ±¼ì²âµ½¶à²Ù×÷ÏµÍ³ÖÐµÄµÚÒ»ÏµÍ³ÊÕµ½Ö§¸¶Ö¸ÁîÊ±£¬²úÉúÒ»ÇÐ»»Ö¸Áî£»¸ù¾ÝÇÐ»»Ö¸Áî´ÓµÚÒ»ÏµÍ³ÇÐ»»ÖÁÖ§¸¶ÏµÍ³£»¸ù¾ÝÖ§¸¶Ö¸ÁîÆô¶¯Ö§¸¶Ó¦ÓÃ¡£±¾·¢Ã÷½«Ö§¸¶ÒµÎñÏÞ¶¨µ½°²×°ÓÐÖ§¸¶Ó¦ÓÃµÄÖ§¸¶ÏµÍ³ÖÐ½øÐÐ£¬¶øÆäËû²Ù×÷ÏµÍ³ÎÞ·¨½øÐÐÖ§¸¶ÒµÎñ£¬¼«´óµØ½â¾öÁËÏÖÓÐ¼¼ÊõÖÐÓÃ»§Ö§¸¶°²È«µÄÎÊÌâ£¬ÔÚ²»½µµÍÓÃ»§ÌåÑéµÄÍ¬Ê±£¬±£»¤ÓÃ»§ÒþË½Êý¾Ý£…	°²È«
Ò»ÖÖ°²È«Ö§¸¶»ò¹ºÎïµÄ·½·¨¼°ÖÕ¶ËÉè±¸	±±¾©Ææ»¢¿Æ¼¼ÓÐÏÞ¹«Ë¾	2015-09-30	2019-04-26	CN109685509A	Ö÷·ÖÀàºÅ£ºG06Q20/38(2012.01)I	ÔÚÉó-¹«¿ª	100088 ±±¾©ÊÐÎ÷³ÇÇøÐÂ½Ö¿ÚÍâ´ó½Ö28ºÅD×ù112ÊÒ£¨µÂÊ¤Ô°Çø£©	±¾·¢Ã÷Ìá¹©ÁËÒ»ÖÖ°²È«Ö§¸¶»ò¹ºÎïµÄ·½·¨ºÍÖÕ¶ËÉè±¸£¬±¾·¢Ã÷µÄ·½·¨ÔÚ¼ì²âµ½ÓÃ»§µÄÖ§¸¶»ò¹ºÎï²Ù×÷Ê±£¬»ñµÃ¶ÔÓ¦µÄÖ§¸¶»òÕß¹ºÎïÇëÇóÊý¾Ý¡£È»ºó»ùÓÚËùÊöÖ§¸¶»ò¹ºÎï·þÎñÆ÷µÄÌØÕ÷ÐÅÏ¢ÅÐ¶ÏËùÊöÖ§¸¶»ò¹ºÎï·þÎñÆ÷ÊÇ·ñÖ§³Ö½¨Á¢Ô¤Éè°²È«Í¨µÀ½ÓÊÕËùÊöÖ§¸¶»òÕß¹ºÎïÇëÇóÊý¾Ý¡£ÈôÖ§³ÖÔòÀûÓÃ´úÀí×°ÖÃ½¨Á¢ËùÊöÔ¤Éè°²È«Í¨µÀ×ª·¢Ö§¸¶»òÕß¹ºÎïÇëÇóÊý¾Ý¸øËùÊöÖ§¸¶»ò¹ºÎï·þÎñÆ÷¡£ÓÉÓÚËùÊöÔ¤Éè°²È«Í¨µÀµÄ°²È«¼¶±ð¸ßÓÚhttpsÍ¨µÀ£¬Òò´Ë£¬±¾·¢Ã÷ÔÚ½øÐÐÍøÂçÖ§¸¶…	°²È«
Ö§¸¶ÐÅÏ¢µÄ±£»¤·½·¨¼°×°ÖÃ	¹ã¶«Å·çêÒÆ¶¯Í¨ÐÅÓÐÏÞ¹«Ë¾	2015-10-09	2016-02-17	CN105335632A	Ö÷·ÖÀàºÅ£ºG06F21/31(2013.01)I	ÓÐÐ§-ÊÚÈ¨	523860 ¹ã¶«Ê¡¶«Ý¸ÊÐ³¤°²ÕòÎÚÉ³º£±õÂ·18ºÅ	±¾·¢Ã÷¹«¿ªÁËÒ»ÖÖÖ§¸¶ÐÅÏ¢µÄ±£»¤·½·¨¼°×°ÖÃ¡£ËùÊö·½·¨°üÀ¨£ºÈç¹ûÓÃ»§´¥·¢Ô¤ÉèË¢»úÐÐÎª£¬ÔòËø¶¨Ö§¸¶ÐÅÏ¢£»ÔÚËùÊöÔ¤ÉèË¢»úÐÐÎª½áÊøºó£¬¶ÔËùÊöÓÃ»§½øÐÐ¼øÈ¨£»Èç¹û¼øÈ¨³É¹¦£¬Ôò½âËøËùÊöÖ§¸¶ÐÅÏ¢¡£±¾·¢Ã÷Ìá¹©µÄ¼¼Êõ·½°¸£¬ÔÚÓÃ»§´¥·¢Ô¤ÉèË¢»úÐÐÎªÊ±£¬Ëø¶¨Ö§¸¶ÐÅÏ¢£¬Ê¹µÃË¢»úÓÐÓÃ»§ÎÞ·¨Í¨¹ýNFCÐ¾Æ¬½øÐÐ¸¶·Ñ¡£ÔÚÔ¤ÉèË¢»úÐÐÎª½áÊøºó£¬¶ÔÓÃ»§½øÐÐ¼øÈ¨£¬µ±¼øÈ¨³É¹¦Ê±£¬±íÃ÷ÓÃ»§ÎªºÏ·¨ÓÃ»§¡£ÓëÏÖÓÐ¼¼ÊõÖÐÓÃ»§Ë¢»úºó¿ÉÖ±½ÓÊ¹ÓÃNFCÐ¾Æ¬½øÐÐ¸¶·ÑÏ…	°²È«
ÒôÆµ×ª½Ó×°ÖÃÒÔ¼°°²È«ÈÏÖ¤ÏµÍ³	±±¾©´óÃ÷ÎåÖÞ¿Æ¼¼ÓÐÏÞ¹«Ë¾	2015-10-09	2016-01-06	CN105226472A	Ö÷·ÖÀàºÅ£ºH01R31/06(2006.01)I	Ê§Ð§-·¢Ã÷×¨ÀûÉêÇë¹«²¼ºóµÄÊÓÎª³·»Ø	100192 ±±¾©ÊÐº£µíÇø±±¾©º£µíÇøºÚÈªÂ·8ºÅ1´±¿µ½¡±¦Ê¤¹ã³¡C×ù°Ë²ã8001	±¾·¢Ã÷¹«¿ªÁËÒ»ÖÖÒôÆµ×ª½Ó×°ÖÃÒÔ¼°°²È«ÈÏÖ¤ÏµÍ³£¬ÒôÆµ×ª½Ó×°ÖÃ°üÀ¨£ºÖ÷¿ØÐ¾Æ¬¡¢µçÔ´¡¢ÒôÆµÍ¨Ñ¶½Ó¿Ú¡¢ÒôÆµÐÅºÅ´¦Àíµ¥Ôª¡¢USBÍ¨Ñ¶½Ó¿Ú£¬µçÔ´ÓëÖ÷¿ØÐ¾Æ¬Á¬½Ó£¬ÒôÆµÍ¨Ñ¶½Ó¿ÚÓëÒôÆµÐÅºÅ´¦Àíµ¥ÔªÁ¬½Ó¡¢Óë±ãÐ¯ÖÕ¶ËµÄÒôÆµ¿ÚÁ¬½Ó£¬ÒôÆµÐÅºÅ´¦Àíµ¥ÔªÓëÖ÷¿ØÐ¾Æ¬Á¬½Ó£»ÒôÆµÍ¨Ñ¶½Ó¿ÚÓÃÓÚ»ñÈ¡Ä£Äâ½»Ò×Êý¾Ý£»ÒôÆµÐÅºÅ´¦Àíµ¥ÔªÓÃÓÚ¶ÔÄ£Äâ½»Ò×Êý¾Ý½øÐÐÊý×Ö»¯Éú³ÉÊý×Ö½»Ò×Êý¾Ý£¬²¢´«Êä¸øÏòÖ÷¿ØÐ¾Æ¬£»Ö÷¿ØÐ¾Æ¬ÓÃÓÚ¹¤×÷ÓÚhostÄ£Ê½ÒÔ½«Êý×Ö½»Ò×Êý¾Ý×ª»»…	°²È«
¿É¼ø±ðÊÇ·ñÊÇÒÑÈÏÖ¤ÒÆ¶¯´æ´¢½éÖÊµÄ×°ÖÃ	¹úÍø½­Î÷Ê¡µçÁ¦¹«Ë¾ÄÏ²ý¹©µç·Ö¹«Ë¾	2015-10-20	2015-12-16	CN105160260A	Ö÷·ÖÀàºÅ£ºG06F21/57(2013.01)I	ÓÐÐ§-ÊÚÈ¨	330006 ½­Î÷Ê¡ÄÏ²ýÊÐµþÉ½Â·383ºÅ	±¾·¢Ã÷¹«¿ªÁËÒ»ÖÖ¿É¼ø±ðÊÇ·ñÊÇÒÑÈÏÖ¤ÒÆ¶¯´æ´¢½éÖÊµÄ×°ÖÃ£¬°üÀ¨´¦Àíµ¥Ôª£¬ÌØÕ÷ÊÇ£º»¹°üÀ¨ÒÆ¶¯´æ´¢½éÖÊÊ¶±ðµ¥Ôª¡¢Î´ÈÏÖ¤Éè±¸ÌáÊ¾µ¥ÔªºÍÒÑÈÏÖ¤Éè±¸ÌáÊ¾µ¥Ôª¡£±¾·¢Ã÷ÄÜ·½±ãµØ¼ø±ð²åÈëµÄÒÆ¶¯´æ´¢½éÖÊÊÇ·ñ¾­¹ý°²È«ÈÏÖ¤£¬´Ó¶øÌáÐÑ¹¤×÷ÈËÔ±¸ÃÒÆ¶¯´æ´¢½éÖÊÊÇ·ñÊÇÒÑÈÏÖ¤µÄ°²È«ÒÆ¶¯´æ´¢½éÖÊ£¬²¢¸ù¾Ý²åÈëÒÆ¶¯´æ´¢½éÖÊµÄ²»Í¬·¢³ö²»Í¬µÄÌáÊ¾ÐÅºÅ£¬±¾·¢Ã÷¾ßÓÐÌáÊ¾·½Ê½¸üÎªÈËÐÔ»¯¡¢½á¹¹¼òµ¥µÄÓÅµã£¬Ëü¿ÉÒÔ·½±ãµØÐ­Öú¹¤×÷ÈËÔ±±æ±ðÊÖÖÐÄÃµÄÒÆ¶¯´æ´¢½…	°²È«
Ò»ÖÖÖ¸ÎÆÐÅÏ¢µÄ°²È«Ô¶³ÌÊÚÈ¨·½·¨ÒÔ¼°ÏµÍ³	ÔÆ¶¡ÍøÂç¼¼Êõ£¨±±¾©£©ÓÐÏÞ¹«Ë¾	2015-10-23	2016-01-06	CN105224933A	Ö÷·ÖÀàºÅ£ºG06K9/00(2006.01)I	ÔÚÉó-ÊµÖÊÉó²éµÄÉúÐ§	100085 ±±¾©ÊÐº£µíÇøÎ÷¶þÆìÎ÷Â·ÁìÐãÐÂ¹è¹ÈDÇø42ºÅ104¶°	±¾·¢Ã÷¹«¿ªÁËÒ»ÖÖÖ¸ÎÆÐÅÏ¢µÄ°²È«Ô¶³ÌÊÚÈ¨·½·¨¼°ÏµÍ³£¬Æä²ÉÓÃ²É¼¯¼ÓÃÜ£¬´«Êä´æ´¢£¬ÊÚÈ¨ÑéÖ¤µÄ²½Öè£¬ÒÔ¼°ÏàÓ¦µÄÖ¸ÎÆ²É¼¯Éè±¸£¬Ö¸ÎÆÑéÖ¤Éè±¸£¬·þÎñÆ÷£¬Ê¹µÃÖ¸ÎÆ¼ÓÃÜÐÅÏ¢´«Êä£¬´æ´¢£¬ÊÚÈ¨¹ý³ÌÖÐ£¬¼´Ê¹Ö¸ÎÆ¼ÓÃÜÐÅÏ¢A`±»Ð¹Â¶£¬Ö»ÐèÒªÐÞ¸Ä±ä»»Ëã·¨µÄ¿É±äµÄ±ä»»²ÎÊýx£¬Ö¸ÎÆ¼ÓÃÜÐÅÏ¢A`¾Í½«Ê§Ð§£¬¶øÓÃ»§µÄÔ­Ê¼Ö¸ÎÆÐÅÏ¢A²»»á±»Ð¹Â¶£¬±£ÁôÁËÖ¸ÎÆÊ¶±ðµÄÓÅÊÆ£¬Í¬Ê±£¬×î´ó³Ì¶ÈÉÏ±ÜÃâÁËÇ±ÔÚµÄÐ¹Â¶·çÏÕ¡£	°²È«
Ò»ÖÖÖ¸ÎÆÊ¶±ð·½·¨¼°ÒÆ¶¯ÖÕ¶Ë	Î¬ÎÖÒÆ¶¯Í¨ÐÅÓÐÏÞ¹«Ë¾	2015-10-26	2016-02-24	CN105354466A	Ö÷·ÖÀàºÅ£ºG06F21/32(2013.01)I	ÓÐÐ§-×¨ÀûÉêÇëÈ¨¡¢×¨ÀûÈ¨µÄ×ªÒÆ	523860 ¹ã¶«Ê¡¶«Ý¸ÊÐ³¤°²ÕòÎÚÉ³²½²½¸ß´óµÀ283ºÅ	±¾·¢Ã÷Ìá¹©ÁËÒ»ÖÖÖ¸ÎÆÊ¶±ð·½·¨¼°ÒÆ¶¯ÖÕ¶Ë£¬¸Ã·½·¨Ó¦ÓÃÓÚÒ»ÉèÖÃÓÐÇ¶ÈëÊ½°²È«Ð¾Æ¬ºÍ¿ÉÐÅÇøÓòÄ£¿éµÄÒÆ¶¯ÖÕ¶Ë£¬¸Ã·½·¨°üÀ¨£ºµ±½ÓÊÕµ½Ö¸ÎÆÊ¶±ðµÄÖ¸ÁîÊ±£¬Ê¹Ç¶ÈëÊ½°²È«Ð¾Æ¬»ñÈ¡µ±Ç°ÓÃ»§ÊäÈëµÄÖ¸ÎÆÍ¼Ïñ£»¶ÔÖ¸ÎÆÍ¼Ïñ½øÐÐÌØÕ÷ÌáÈ¡£¬µÃµ½Ö¸ÎÆÌØÕ÷£»½«ËùÊöÖ¸ÎÆÌØÕ÷·¢ËÍÖÁËùÊöÇ¶ÈëÊ½°²È«Ð¾Æ¬µÄÎ¢´¦ÀíÆ÷£¬Ê¹ËùÊöÇ¶ÈëÊ½°²È«Ð¾Æ¬µÄÎ¢´¦ÀíÆ÷¶ÔËùÊöÖ¸ÎÆÌØÕ÷½øÐÐÊý¾Ý´¦Àí²¢½øÐÐÖ¸ÎÆÊ¶±ð£¬µÃµ½Ö¸ÎÆÊ¶±ð½á¹û£»Ê¹ËùÊöÇ¶ÈëÊ½°²È«Ð¾Æ¬½«ËùÊöÖ¸ÎÆÊ¶±ð½á¹û·…	°²È«
¿ÉÐÅÓÃ»§½çÃæÏÔÊ¾·½·¨¼°ÏµÍ³	ÖÐ¹úÒøÁª¹É·ÝÓÐÏÞ¹«Ë¾	2015-10-29	2016-05-18	CN105590069A	Ö÷·ÖÀàºÅ£ºG06F21/74(2013.01)I	ÓÐÐ§-ÊÚÈ¨	200135 ÉÏº£ÊÐÆÖ¶«ÐÂÇøº¬Ð¦Â·36ºÅÒøÁª´óÏÃ	±¾·¢Ã÷Éæ¼°¿ÉÐÅÓÃ»§½çÃæÏÔÊ¾·½·¨£¬ÆäÓ¦ÓÃÔÚ²ÉÓÃ°²È«²Ù×÷ÏµÍ³ÓëÒÆ¶¯²Ù×÷ÏµÍ³µÄµç×ÓÉè±¸ÖÐ£¬¸Ã·½·¨°üÀ¨£ºa)ÔÚÏÔÊ¾Ö®Ç°£¬½«ÒÆ¶¯²Ù×÷ÏµÍ³µÄ´ýÏÔÊ¾½çÃæµÄÊý¾Ý´«ËÍ¸øËùÊö°²È«²Ù×÷ÏµÍ³£»b)ËùÊö°²È«²Ù×÷ÏµÍ³½ÓÊÕÀ´×ÔËùÊöÒÆ¶¯²Ù×÷ÏµÍ³µÄ´ýÏÔÊ¾½çÃæµÄÊý¾Ý£¬²¢´¦Àí´ýÏÔÊ¾½çÃæµÄÊý¾Ý£»c)½«¾­´¦ÀíµÄ´ýÏÔÊ¾½çÃæµÄÊý¾ÝÊä³öµ½¸Ãµç×ÓÉè±¸µÄÏÔÊ¾²¿¼þ£¬ÒÔ±ãÏÔÊ¾¡£»¹Ìá¹©¿ÉÐÅÓÃ»§½çÃæÏÔÊ¾ÏµÍ³¡£	°²È«
·ÀÖ¹Í¨¹ýIC¿¨¶ÁÈ¡Ä£¿é½øÐÐÇÔÃÜµÄ°²È«±£»¤×°ÖÃ	½­ËÕºÍÇÇ¿Æ¼¼¹É·ÝÓÐÏÞ¹«Ë¾	2015-10-29	2016-02-03	CN105303129A	Ö÷·ÖÀàºÅ£ºG06F21/79(2013.01)I	ÔÚÉó-ÊµÖÊÉó²éµÄÉúÐ§	215600 ½­ËÕÊ¡ËÕÖÝÊÐÕÅ¼Ò¸ÛÊÐ·ï»ËÕòÎ÷ÕÅÕò±±Â·20ºÅ½­ËÕºÍÇÇ¿Æ¼¼¹É·ÝÓÐÏÞ¹«Ë¾	±¾·¢Ã÷¹«¿ªÁËÒ»ÖÖ·ÀÖ¹Í¨¹ýIC¿¨¶ÁÈ¡Ä£¿é½øÐÐÇÔÃÜµÄ°²È«±£»¤×°ÖÃ£¬ÔÚÖ÷°åÉÏÉèÖÃÓÐ´ø¼ì²âµçÂ·ºÍ×Ô»ÙµçÂ·µÄMCU¡¢IC¿¨¶ÁÈ¡Ä£¿éºÍIC¿¨×ù£¬ÔÚÖ÷°åÉÏÉèÖÃÓÐÎ§Ç½°åºÍIC¿¨¸Ç°å£¬ËùÊöµÄÎ§Ç½°å½«IC¿¨¶ÁÈ¡Ä£¿éµÄËÄ¸ö²àÃæ¼°IC¿¨×ùÉÏ³ýIC¿¨²å¿¨ÃæÖ®ÍâµÄÆäËûÈý¸ö²àÃæ°üÎ§×¡£¬IC¿¨¸Ç°å½ôÌù¸²¸ÇÔÚÎ§Ç½°åÉÏ£»ÔÚÎ§Ç½°åÉÏÉèÖÃÓëMCUÖÐµÄ¼ì²âµçÂ·Ïàµ¼Í¨µÄµÚÒ»±£»¤ÏßÂ·£¬ÔÚIC¿¨¸Ç°åÉÏÉèÖÃÓÐÓëMCUÖÐµÄ¼ì²âµçÂ·Ïàµ¼Í¨µÄµÚ¶þ±£»¤ÏßÂ·£¬ÈôµÚÒ»±£»¤ÏßÂ·»òµÚ¶þ±£…	°²È«
ÖÇÄÜPOS»ú°²È«ÈÏÖ¤·½·¨¼°×°ÖÃ	ÖÐ¹úÃñÉúÒøÐÐ¹É·ÝÓÐÏÞ¹«Ë¾	2015-10-30	2016-03-16	CN105404812A	Ö÷·ÖÀàºÅ£ºG06F21/51(2013.01)I	ÔÚÉó-ÊµÖÊÉó²éµÄÉúÐ§	100031 ±±¾©ÊÐÎ÷³ÇÇø¸´ÐËÃÅÄÚ´ó½Ö2ºÅ	±¾·¢Ã÷ÊµÊ©ÀýÌá¹©Ò»ÖÖÖÇÄÜPOS»ú°²È«ÈÏÖ¤·½·¨¼°×°ÖÃ¡£¸Ã·½·¨°üÀ¨£ºÖÇÄÜPOS»ú»ñÈ¡Ó¦ÓÃÏÂÔØÎÄ¼þ£»ËùÊöÖÇÄÜPOS»úÅÐ¶ÏËùÊöÓ¦ÓÃÏÂÔØÎÄ¼þÊÇ·ñ°üÀ¨Ç©ÃûÐÅÏ¢£»ÈôËùÊöÓ¦ÓÃÏÂÔØÎÄ¼þ°üÀ¨Ç©ÃûÐÅÏ¢£¬ÔòËùÊöÖÇÄÜPOS»úÒÀ¾ÝµÚÒ»ÃÜÔ¿ÐÅÏ¢ÅÐ¶ÏËùÊöÇ©ÃûÐÅÏ¢ÊÇ·ñºÏ·¨£»ÈôËùÊöÇ©ÃûÐÅÏ¢ºÏ·¨£¬ÔòËùÊöÖÇÄÜPOS»úÒÀ¾ÝËùÊöÓ¦ÓÃÏÂÔØÎÄ¼þ°²×°Ó¦ÓÃ³ÌÐò¡£±¾·¢Ã÷ÊµÊ©ÀýÍ¨¹ýÖÇÄÜPOS»ú¶Ô»ñÈ¡µ½µÄÓ¦ÓÃÏÂÔØÎÄ¼þ½øÐÐÇ©ÃûÐÅÏ¢µÄÈÏÖ¤£¬ÈôÓ¦ÓÃÏÂÔØÎÄ¼þµÄÇ©ÃûÐÅÏ¢ÈÏÖ¤Í¨¹ý£¬Ô…	°²È«
Ò»ÖÖ½ðÈÚ½»Ò×°²È«¿ØÖÆ·½·¨	ÏÄñ´	2015-10-30	2016-02-24	CN105354471A	Ö÷·ÖÀàºÅ£ºG06F21/32(2013.01)I	Ê§Ð§-·¢Ã÷×¨ÀûÉêÇë¹«²¼ºóµÄÊÓÎª³·»Ø	246121 °²»ÕÊ¡°²ÇìÊÐ»³ÄþÏØ¸ßºÓÕòÇ°½ø¾ÓÎ¯»áÕþºÍÂ·021ºÅ1¶°502ÊÒ	±¾·¢Ã÷¹«¿ªÁËÒ»ÖÖ½ðÈÚ½»Ò×°²È«¿ØÖÆ·½·¨£¬°üÀ¨ÒÔÏÂ²½Öè£º1)¡¢×Ô¶¯¹ñÔ±»úÊ¶±ðÓÃ»§µÄÖ¸ÎÆÐÅÏ¢£¬»ñÈ¡ÓÃ»§µÄÒøÐÐÕË»§ÐÅÏ¢£»ÆäÖÐ£¬ËùÊöÓÃ»§µÄÖ¸ÎÆÐÅÏ¢ÊÇÓÉÒøÐÐÌá¹©µÄ²¢Ô¤ÏÈ´æ´¢ÔÚÓÃ¸Ã×Ô¶¯¹ñÔ±»úµÄÊý¾Ý¿âÖÐ£¬ËùÊöÒøÐÐÕË»§ÐÅÏ¢°üÀ¨ÓÃ»§µÄÒøÐÐÕËºÅ¡¢Éí·ÝÖ¤ºÅÂëºÍÊÖ»úºÅÂë£»2)¡¢¸ù¾Ý²½Öè1)ÖÐ×Ô¶¯¹ñÔ±»úÊ¶±ðµÄÖ¸ÎÆÐÅÏ¢£¬Í¨¹ýÔ¤ÁôÑéÖ¤Âë¡¢ÃÜÂë»òÕßÆä½áºÏµÄÑéÖ¤·½Ê½¶ÔÓÃ»§½øÐÐÉí·ÝÑéÖ¤£»3)¡¢ÔÚÉí·ÝÑéÖ¤Í¨¹ýºó£¬½øÐÐ½ðÈÚ½»Ò×£»·ñÔò½»Ò×Ê§°Ü£¬µ÷È…	°²È«
Ò»ÖÖÒÆ¶¯Ö§¸¶µÄ·½·¨¼°ÓÃÓÚÒÆ¶¯Ö§¸¶µÄ×°ÖÃ	¶«Ý¸¿áÅÉÈí¼þ¼¼ÊõÓÐÏÞ¹«Ë¾	2015-11-02	2016-06-01	CN105631674A	Ö÷·ÖÀàºÅ£ºG06Q20/40(2012.01)I	ÔÚÉó-ÊµÖÊÉó²éµÄÉúÐ§	523500 ¹ã¶«Ê¡¶«Ý¸ÊÐËÉÉ½ºþ¸ßÐÂ¼¼Êõ²úÒµ¿ª·¢Çø¹¤ÒµÎ÷Ò»Â·3ºÅÒ»ÆÚ¹¤³Ì1ºÅ³§·¿3Â¥	±¾·¢Ã÷¹«¿ªÁËÒ»ÖÖÒÆ¶¯Ö§¸¶µÄ·½·¨¼°ÓÃÓÚÒÆ¶¯Ö§¸¶µÄ×°ÖÃ£¬¸Ã·½·¨°üÀ¨£º»ñÈ¡ÓÃ»§µÄ¶©µ¥ÐÅÏ¢£»ÏòÔ¤ÉèµÄ¼øÈ¨ÖÕ¶Ë·¢³ö¼øÈ¨ÇëÇó£»½ÓÊÕ¼øÈ¨ÖÕ¶ËµÄ¼øÈ¨·´À¡ÐÅÏ¢£»ÅÐ¶Ï¼øÈ¨·´À¡ÐÅÏ¢ÊÇ·ñ·ûºÏÔ¤ÉèÌõ¼þ£»Èô¼øÈ¨·´À¡ÐÅÏ¢·ûºÏÔ¤ÉèÌõ¼þ£¬Ôò½øÐÐÒÆ¶¯Ö§¸¶¡£µ±ÓÃ»§ÔÚÍøÉÏÑ¡ÖÐÉÌÆ·½øÐÐÏÂµ¥»ñµÃÓÃ»§µÄ¶©µ¥ÐÅÏ¢ºó£¬×Ô¶¯´¥·¢¼øÈ¨Á÷³Ì£¬±ØÐëÏòÔ¤ÉèµÄ¼øÈ¨ÖÕ¶Ë·¢³ö¼øÈ¨ÇëÇó£¬²¢½ÓÊÕ¼øÈ¨ÖÕ¶Ë·´À¡µÄ¼øÈ¨·´À¡ÐÅÏ¢£¬²¢ÔÚÅÐ¶¨¼øÈ¨·´À¡ÐÅÏ¢·ûºÏÔ¤ÉèÌõ¼þÊ±£¬¼´¼øÈ¨³…	Ö§¸¶
»ùÓÚÒÆ¶¯ÖÕ¶Ë½øÐÐÉí·ÝÑéÖ¤µÄÏµÍ³¼°·½·¨	ÉÏº£ì³Ñ¶Êý¾ÝÍ¨ÐÅ¼¼ÊõÓÐÏÞ¹«Ë¾	2015-11-05	2016-03-23	CN105426735A	Ö÷·ÖÀàºÅ£ºG06F21/35(2013.01)I	ÔÚÉó-ÊµÖÊÉó²éµÄÉúÐ§	201616 ÉÏº£ÊÐËÉ½­ÇøË¼ÏÍÂ·3666ºÅ	±¾·¢Ã÷Ìá¹©Ò»ÖÖ»ùÓÚÒÆ¶¯ÖÕ¶Ë½øÐÐÉí·ÝÑéÖ¤µÄÏµÍ³¼°·½·¨£¬¸ÃÏµÍ³°üÀ¨£ºÉèÓÚÒÆ¶¯ÖÕ¶ËÉÏµÄÕñ¶¯Éú³ÉÄ£¿é£¬ÓÃÓÚ½«ÒøÐÐ¿¨ÃÜÂëÐÅÏ¢×ª»¯ÎªÕñ¶¯ÃÜÂë£»ÉèÓÚATMÖÕ¶ËÉÏµÄÕñ¶¯¼ì²âÄ£¿é£¬ÓÃÓÚ¶ÁÈ¡ËùÊöÕñ¶¯Éú³ÉÄ£¿éÊä³öµÄÕñ¶¯ÃÜÂë£»ÉèÓÚËùÊöATMÖÕ¶ËÉÏÇÒÓëËùÊöÕñ¶¯¼ì²âÄ£¿éÁ¬½ÓµÄÊ¶±ðÄ£¿é£¬ÓÃÓÚ¶ÔËùÊöÕñ¶¯ÃÜÂë½øÐÐÊ¶±ðÐÎ³É¶ÔÓ¦µÄÊ¶±ðÃÜÂë£»ÉèÓÚËùÊöATMÖÕ¶ËÉÏÇÒÓëËùÊöÊ¶±ðÄ£¿éÁ¬½ÓµÄÃÜÂëÑéÖ¤Ä£¿é£¬½«ËùÊöÊ¶±ðÃÜÂëÓëËùÊöÒøÐÐ¿¨ËùÊôµÄÃÜÂë½øÐÐÃÜÂëÑéÖ¤…	°²È«
Ò»ÖÖ»ùÓÚ¶¯Ì¬ÐÅºÅµÄ°²È«±£»¤×°ÖÃ¡¢·½·¨ºÍPOS»ú	ÉîÛÚÊÐÐÂ¹ú¶¼Ö§¸¶¼¼ÊõÓÐÏÞ¹«Ë¾	2015-11-13	2016-03-30	CN105447413A	Ö÷·ÖÀàºÅ£ºG06F21/71(2013.01)I	ÔÚÉó-ÊµÖÊÉó²éµÄÉúÐ§	518040 ¹ã¶«Ê¡ÉîÛÚÊÐ¸£ÌïÇøÉ³Í·½ÖµÀÌ©È»¾¢ËÉ´óÏÃ17B	±¾·¢Ã÷µÄ¼¼Êõ·½°¸°üÀ¨Ò»ÖÖ»ùÓÚ¶¯Ì¬ÐÅºÅµÄ°²È«±£»¤×°ÖÃ¡¢·½·¨ºÍPOS»ú¡£¸Ã×°ÖÃ°üÀ¨¶¯Ì¬ÐÅºÅ·¢Éúµ¥Ôª¡¢Íâ²¿±£»¤µ¥ÔªºÍ¶¯Ì¬ÐÅºÅ±È½Ïµ¥Ôª£»ËùÊö¶¯Ì¬ÐÅºÅ·¢Éúµ¥ÔªÁ¬½ÓËùÊöÍâ²¿±£»¤µ¥Ôª²¢ÏòÆäÊä³ö¶¯Ì¬ÐÅºÅ£»ËùÊö¶¯Ì¬ÐÅºÅ±È½Ïµ¥Ôª·Ö±ðÁ¬½ÓËùÊö¶¯Ì¬ÐÅºÅ·¢Éúµ¥ÔªºÍËùÊöÍâ²¿±£»¤µ¥Ôª£¬Í¨¹ýÊä³ö¶ËÊä³öÁ½Õß´«ÊäµÄ¶¯Ì¬ÐÅºÅµÄ±È½Ï½á¹û¡£¸Ã·½·¨°üÀ¨²½Öè£º¶¯Ì¬ÐÅºÅ·¢Éúµ¥ÔªÌá¹©²¨ÐÎËæÊ±¼ä¶¯Ì¬±ä»¯µÄ¶¯Ì¬ÐÅºÅ¸øÍâ²¿±£»¤µ¥ÔªºÍ¶¯Ì¬ÐÅºÅ±È½Ïµ¥Ôª£»¶¯Ì¬…	°²È«
×ÔÖú·¢¿¨Éè±¸¼°ÆäÉí·ÝÈÏÖ¤ÏµÍ³ºÍÉí·ÝÈÏÖ¤·½·¨	ÖÐ¹ú½¨ÉèÒøÐÐ¹É·ÝÓÐÏÞ¹«Ë¾	2015-11-13	2016-03-30	CN105447367A	Ö÷·ÖÀàºÅ£ºG06F21/32(2013.01)I	ÔÚÉó-ÊµÖÊÉó²éµÄÉúÐ§	100032 ±±¾©ÊÐÎ÷³ÇÇø½ðÈÚ´ó½Ö25ºÅ	±¾·¢Ã÷¹«¿ªÁËÒ»ÖÖ×ÔÖú·¢¿¨Éè±¸¼°ÆäÉí·ÝÈÏÖ¤ÏµÍ³ºÍÉí·ÝÈÏÖ¤·½·¨£¬ÆäÖÐ£¬ËùÊöÉí·ÝÈÏÖ¤ÏµÍ³°üÀ¨Éí·ÝÐÅÏ¢²É¼¯Ä£¿é£¬ÓÃÓÚ»ñÈ¡¿Í»§µÄÓÐÐ§Éí·ÝÐÅÏ¢£»ÏÖ³¡Í¼Ïñ²É¼¯Ä£¿é£¬ÓÃÓÚ»ñÈ¡¿Í»§µÄÃæ²¿Í¼ÏñÐÅÏ¢£»ÈËÁ³Ê¶±ð±È¶ÔÄ£¿é£¬ÓÃÓÚ½«¿Í»§µÄÓÐÐ§Éí·ÝÐÅÏ¢ÖÐµÄÍ¼ÏñÐÅÏ¢Óë»ñÈ¡µÄÃæ²¿Í¼ÏñÐÅÏ¢½øÐÐ±È¶Ô²¢»ñµÃÈËÁ³Ê¶±ð±È¶Ô½á¹û£»ÉóºËÇëÇó·´À¡Ä£¿é£¬ÓÃÓÚÇëÇóÉóºË¿Í»§µÄÓÐÐ§Éí·ÝÐÅÏ¢¡¢»ñÈ¡µÄÃæ²¿Í¼ÏñÐÅÏ¢ºÍÈËÁ³Ê¶±ð±È¶Ô½á¹û²¢»ñÈ¡ÉóºË½á¹û¡£Í¨¹ý×Ô¶¯»ñÈ¡¿…	°²È«
Ò»ÖÖÒøÐÐÓÃÈÏÖ¤Ê¶±ðÏµÍ³¼°·½·¨	½­ËÕÍò¼Ñ¿Æ¼¼¿ª·¢ÓÐÏÞ¹«Ë¾	2015-11-16	2017-05-24	CN106709302A	Ö÷·ÖÀàºÅ£ºG06F21/32(2013.01)I	ÔÚÉó-ÊµÖÊÉó²éµÄÉúÐ§	212009 ½­ËÕÊ¡Õò½­ÊÐ¶¡Ã®ÖÇ»Û´óµÀ´óÑ§¿Æ¼¼Ô°606	±¾·¢Ã÷¹«¿ªÁËÒ»ÖÖÒøÐÐÓÃÈÏÖ¤Ê¶±ðÏµÍ³£¬°üÀ¨£ºÖ¸ÎÆ²É¼¯Ä£¿é£¬Í¼Æ¬´¦ÀíÄ£¿é£¬ÐÅÏ¢¼ÓÃÜÄ£¿é£¬´«ÊäÄ£¿é£¬½âÃÜÄ£¿é£¬Ê¶±ðÄ£¿éºÍÏÔÊ¾Ä£¿é¡£¾ßÌå·½·¨²½ÖèÈçÏÂ£ºµÚÒ»²½£ºÍ¨¹ýÖ¸ÎÆ²É¼¯Ä£¿é¶Ô¿Í»§µÄÖ¸ÎÆÐÅÏ¢½øÐÐ²É¼¯²¢½«²É¼¯µ½µÄÖ¸ÎÆ½øÐÐÍ¼Æ¬»¯´¦Àí£»µÚ¶þ²½£º½«Í¼Æ¬»¯´¦ÀíºóµÄÐÅÏ¢½øÐÐ¼ÓÃÜ²¢Í¨¹ý´«ÊäÄ£¿é½øÐÐ´«Êä£»µÚÈý²½£º½«½ÓÊÕµ½µÄÐÅÏ¢½øÐÐ½âÃÜ²¢Í¨¹ýÊ¶±ðÄ£¿é½øÐÐ±È¶ÔÊ¶±ðÒÔ¼°¸Ã¿Í»§µÄ¸öÈËÐÅÏ¢ÌáÈ¡£»µÚËÄ²½£º×îºó£¬½«Ê¶±ð½á¹ûÒÔ¼°¸öÈËÐÅÏ…	°²È«
Ò»ÖÖSAM×°ÖÃµÄ±£»¤·½·¨¡¢ºóÌ¨¼°ÏµÍ³	ÀîÃ÷	2015-11-19	2016-04-13	CN105488367A	Ö÷·ÖÀàºÅ£ºG06F21/31(2013.01)I	ÔÚÉó-ÊµÖÊÉó²éµÄÉúÐ§	100086 ±±¾©ÊÐº£µíÇøÌ«ÔÂÔ°12ºÅÂ¥603ÊÒ	±¾·¢Ã÷Ìá¹©Ò»ÖÖSAM×°ÖÃµÄ±£»¤·½·¨¡¢ºóÌ¨¼°ÏµÍ³£¬¸Ã·½·¨°üÀ¨£ººóÌ¨½ÓÊÕµ½²»¾ßÓÐSAMÄ£¿éµÄÉí·ÝÖ¤¶Á¿¨Æ÷·¢ËÍµÄÈÏÖ¤ÇëÇó£»ËùÊöÈÏÖ¤ÇëÇóÖÐÖÁÉÙ°üº¬¶Á¿¨Æ÷ÈÏÖ¤ÐÅÏ¢ÒÔ¼°µÚÒ»Éí·ÝÖ¤ÐÅÏ¢£»ËùÊöºóÌ¨¸ù¾ÝËùÊöÈÏÖ¤ÇëÇóÖÐµÄËùÊö¶Á¿¨Æ÷ÈÏÖ¤ÐÅÏ¢¶ÔËùÊö²»¾ßÓÐSAMÄ£¿éµÄÉí·ÝÖ¤¶Á¿¨Æ÷½øÐÐ°²È«ÈÏÖ¤£¬²¢¸ù¾ÝËùÊöÈÏÖ¤ÇëÇóÖÐµÄËùÊöµÚÒ»Éí·ÝÖ¤ÐÅÏ¢¶ÔËùÊöÉí·ÝÖ¤µÄÕæÊµÐÔ½øÐÐÈ·ÈÏ£»ÔÚ¶ÔËùÊö²»¾ßÓÐSAMÄ£¿éµÄÉí·ÝÖ¤¶Á¿¨Æ÷°²È«ÈÏÖ¤Í¨¹ýºó£¬ÇÒÔÚ¶ÔËùÊöÉí·ÝÖ¤µÄÕ…	°²È«
Ò»ÖÖ»ùÓÚÖ¸ÎÆ»úµÄÒøÐÐ±£ÏÕ¹ñ¹ÜÀíÏµÍ³	±¾¶«ÍøÂç¿Æ¼¼£¨Ìì½ò£©ÓÐÏÞ¹«Ë¾	2015-11-19	2016-02-24	CN105354678A	Ö÷·ÖÀàºÅ£ºG06Q10/06(2012.01)I	ÔÚÉó-¹«¿ª	300000 Ìì½òÊÐÎäÇåÇø¾©½òµç×ÓÉÌÎñ²úÒµÔ°×ÛºÏ°ì¹«Â¥1086ÊÒ	±¾·¢Ã÷Éæ¼°Ò»ÖÖ»ùÓÚÖ¸ÎÆ»úµÄÒøÐÐ±£ÏÕ¹ñ¹ÜÀíÏµÍ³£¬°üÀ¨ÉÏÎ»»ú¡¢Èô¸É¹ÜÀí»ú¡¢Èô¸ÉÏÂÎ»»ú¡¢±£ÏÕ¹ñ£¬ËùÊöÉÏÎ»»ú¡¢¹ÜÀí»ú¡¢ÏÂÎ»»ú¼äÍ¨¹ýÍ¨Ñ¶Ä£¿éÁ¬½Ó£¬ËùÊöÉÏÎ»»ú°üÀ¨ÏµÍ³ÉèÖÃÄ£¿é£¬ËùÊö¹ÜÀí»ú°üÀ¨ÓÃ»§¹ÜÀíÄ£¿é¡¢ÊÂÎñ¹ÜÀíÄ£¿é£¬ËùÊöÏÂÎ»»ú°üÀ¨Ö¸ÎÆ»ú¹ÜÀíÄ£¿é£¬ËùÊöÖ¸ÎÆ»ú¹ÜÀíÄ£¿é°üÀ¨Ö¸ÎÆ²ÉÈ¡Ä£¿é¡¢Ö¸ÎÆÑéÖ¤Ä£¿é¡¢¿ØÖÆÄ£¿é¡¢Ö¸ÎÆÐÞ¸ÄÄ£¿é¡¢Ö¸ÎÆÉ¾³ýÄ£¿é£¬ËùÊöÓÃ»§¹ÜÀíÄ£¿é°üÀ¨ÓÃ»§ÐÂÔöÄ£¿é¡¢ÓÃ»§ÐÅÏ¢ÐÞ¸ÄÄ£¿é¡¢ÓÃ»§ÐÅÏ¢²éÑ¯Ä£¿é£¬ËùÊöÊ…	±£ÏÕ
×ÔÖúÖÕ¶Ë°²È«²Ù×÷¿ØÖÆÏµÍ³¼°¿ØÖÆ·½·¨	ºãÒø½ðÈÚ¿Æ¼¼¹É·ÝÓÐÏÞ¹«Ë¾	2015-11-23	2016-02-03	CN105303095A	Ö÷·ÖÀàºÅ£ºG06F21/34(2013.01)I	ÔÚÉó-¹«¿ª	300308 Ìì½òÊÐ±õº£ÐÂÇøÌì½ò×ÔÃ³Çø£¨¿Õ¸Û¾­¼ÃÇø£©Î÷°ËµÀ30ºÅ	±¾·¢Ã÷¹«¿ªÁËÒ»ÖÖ×ÔÖúÖÕ¶Ë°²È«²Ù×÷¿ØÖÆÏµÍ³£¬°üÀ¨¹Ì¶¨ÉèÖÃÔÚ×ÔÖúÖÕ¶Ë»úÌåÉÏµÄÉí·ÝÊ¶±ðÆ÷£¬ÓëËùÊöµÄÉí·ÝÊ¶±ðÆ÷Í¨Ñ¶Á¬½áµÄµ¥Æ¬»ú£¬ËùÊöµÄµ¥Æ¬»úÓëÉÏÎ»»úÍ¨Ñ¶Á¬½á£¬ËùÊöµÄÉÏÎ»»ú¸ù¾Ýµ¥Æ¬»úµÄÊä³ö¿ØÖÆÆÁÄ»¡¢¼üÅÌºÍÊó±êµÄ¿ªÆô»ò¹Ø±Õ¡£±¾·¢Ã÷Ìá¹©ÁËÍ¨¹ýÉí·ÝÖ¤»òÕßÒøÐÐ¿¨Ê¶±ðÅÐ¶Ï£¬ÓÃ»§²ÅÄÜ²Ù×÷×ÔÖúÖÕ¶ËÉè±¸µÄ¿ØÖÆÏµÍ³¡£ÕâÑù´ó´óÔö¼ÓÁË×ÔÖúÖÕ¶ËÉè±¸µÄ°²È«ÐÔ£¬²¢ÇÒ¿ÉÒÔ×·ËÝ²Ù×÷ÕßÐÅÏ¢£¬·ÀÖ¹ÈËÎªÂÒ²Ù×÷ºÍÆÆ»µ£¬±£Ö¤ÁË·ÇÓÃ»§ÈËÔ±¶Ô×ÔÖúÖÕ¶ËÉ…	°²È«
»ùÓÚÌØÕ÷Ê¶±ðµÄÉí·ÝÈÏÖ¤·½·¨	ÖÐ¹úÒøÁª¹É·ÝÓÐÏÞ¹«Ë¾	2015-11-23	2016-05-18	CN105590046A	Ö÷·ÖÀàºÅ£ºG06F21/32(2013.01)I	ÓÐÐ§-ÊÚÈ¨	200135 ÉÏº£ÊÐÆÖ¶«ÐÂÇøº¬Ð¦Â·36ºÅÒøÁª´óÏÃ	±¾·¢Ã÷Ìá³öÁË»ùÓÚÌØÕ÷Ê¶±ðµÄÉí·ÝÈÏÖ¤·½·¨£¬ËùÊö·½·¨°üÀ¨£º°²È«ÐÔÐÅÏ¢½»»¥ÖÕ¶Ë»ùÓÚÓÃ»§Ö¸ÁîÏòÊý¾Ý´¦Àí·þÎñÆ÷·¢Æð°²È«ÐÔÐÅÏ¢½»»¥ÇëÇó£»Êý¾Ý´¦Àí·þÎñÆ÷»ùÓÚËù½ÓÊÕµ½µÄ°²È«ÐÔÐÅÏ¢½»»¥ÇëÇóÖ¸Ê¾ÌØÕ÷Ê¶±ð·þÎñÆ÷Ïò°²È«ÐÔÐÅÏ¢½»»¥ÖÕ¶Ë´«ËÍÍ¼ÏñÑéÖ¤ÐÅÏ¢£¬ÆäÖÐ£¬Í¼ÏñÑéÖ¤ÐÅÏ¢°üÀ¨ÖÁÉÙÒ»¸öÍ¼Ïñ£»°²È«ÐÔÐÅÏ¢½»»¥ÖÕ¶ËÔÚ½ÓÊÕµ½Í¼ÏñÑéÖ¤ÐÅÏ¢ºóÌáÊ¾ÓÃ»§Ñ¡Ôñ²¢¹Û¿´ÖÁÉÙÒ»¸öÍ¼ÏñÖÐµÄÒ»¸ö£¬²¢²É¼¯ÓÃ»§¹Û¿´ËùÑ¡ÔñµÄÍ¼ÏñÊ±µÄÉúÎïÌØÕ÷ÐÅºÅ£¬ËæÖ®½«Ëù²É¼¯µ…	°²È«
Ò»ÖÖÉí·ÝÊ¶±ð¼°½âËøÖÕ¶ËµÄ·½·¨¼°ÖÕ¶Ë	±±¾©Ææ»¢¿Æ¼¼ÓÐÏÞ¹«Ë¾	2015-11-27	2017-06-09	CN106815505A	Ö÷·ÖÀàºÅ£ºG06F21/32(2013.01)I	ÔÚÉó-¹«¿ª	100088 ±±¾©ÊÐÎ÷³ÇÇøÐÂ½Ö¿ÚÍâ´ó½Ö28ºÅD×ù112ÊÒ£¨µÂÊ¤Ô°Çø£©	±¾ÉêÇë¹«¿ªÁËÒ»ÖÖÉí·ÝÊ¶±ð¼°½âËøÖÕ¶ËµÄ·½·¨¼°ÖÕ¶Ë£¬Éí·ÝÊ¶±ð¼°½âËøÖÕ¶ËµÄ·½·¨°üÀ¨£ºÔÚÖÕ¶ËºÚÆÁËø¶¨×´Ì¬ÏÂ£¬µ±¼ì²âµ½ÓÃ»§´¥ÃþÉèÖÃÓÚÖÕ¶ËË«²àµÄ´¥¿Ø°åºó£¬¸ù¾Ý´¥¿Ø°å»ñÈ¡ÓÃ»§Ö¸ÎÆ²¢½øÐÐÊ¶±ð£¬´¥¿Ø°åÔÚÖÕ¶ËºÚÆÁËø¶¨×´Ì¬ÏÂ£¬»¹ÓÃÓÚÏÔÊ¾ÏµÍ³Ê±¼äÒÔ¼°ÏÔÊ¾½ÓÊÕµ½ÐÂÐÅÏ¢µÄÓ¦ÓÃ³ÌÐòµÄÍ¼±ê£»ÌáÈ¡´¥¿Ø°å»ñÈ¡µÄÓÃ»§Ö¸ÎÆµÄÌØÕ÷ÐÅÏ¢£¬²¢ÓëÔ¤´æÔÚÖ¸ÎÆÐÅÏ¢¿âÖÐµÄÖ¸ÎÆÌØÕ÷ÐÅÏ¢±È¶ÔÏàËÆ¶È£¬¸ù¾ÝÏàËÆ¶È½øÐÐÓÃ»§Éí·ÝÑéÖ¤£»ÈôÏàËÆ¶È´óÓÚ»òµÈÓÚãÚÖµ£¬ÔòÓ…	°²È«
Ò»ÖÖÉí·ÝÊ¶±ð¼°½âËøÖÕ¶ËµÄ·½·¨¼°ÖÕ¶Ë	±±¾©Ææ»¢¿Æ¼¼ÓÐÏÞ¹«Ë¾	2015-11-27	2017-06-09	CN106815506A	Ö÷·ÖÀàºÅ£ºG06F21/32(2013.01)I	ÔÚÉó-¹«¿ª	100088 ±±¾©ÊÐÎ÷³ÇÇøÐÂ½Ö¿ÚÍâ´ó½Ö28ºÅD×ù112ÊÒ£¨µÂÊ¤Ô°Çø£©	±¾ÉêÇë¹«¿ªÁËÒ»ÖÖÉí·ÝÊ¶±ðÒÔ¼°½âËøÖÕ¶ËµÄ·½·¨¼°ÖÕ¶Ë£¬°üÀ¨£ºÔÚÖÕ¶ËºÚÆÁËø¶¨×´Ì¬ÏÂ£¬µ±¼ì²âµ½ÓÃ»§´¥ÃþÉèÖÃÓÚÖÕ¶Ë²à±ßµÄÖ¸ÎÆ°åºó£¬¸ù¾ÝÖ¸ÎÆ°å»ñÈ¡ÓÃ»§Ö¸ÎÆ²¢½øÐÐÊ¶±ð£»ÌáÈ¡Ö¸ÎÆ°å»ñÈ¡µÄÓÃ»§Ö¸ÎÆµÄÌØÕ÷ÐÅÏ¢£¬²¢ÓëÔ¤´æÔÚÖ¸ÎÆÐÅÏ¢¿âÖÐµÄÖ¸ÎÆÌØÕ÷ÐÅÏ¢±È¶ÔÏàËÆ¶È£¬¸ù¾ÝÏàËÆ¶È½øÐÐÓÃ»§Éí·ÝÑéÖ¤£»ÈôÏàËÆ¶È´óÓÚ»òµÈÓÚãÚÖµ£¬ÔòÓÃ»§Éí·ÝÑéÖ¤Í¨¹ý£¬Ôò½âËøÖÕ¶Ë£¬ÒÔ±ãÓÃ»§¶ÔÖÕ¶Ë½øÐÐ²Ù×÷£¬±¾ÉêÇë»¹Ìá¹©ÁËÒ»ÖÖÖÕ¶Ë£¬¸ù¾Ý±¾ÉêÇëÌá¹©µÄ¼¼Êõ·½°¸£¬ÖÕ¶…	°²È«
Ò»ÖÖ±£»¤ÒøÐÐÃÜÂë·ÀµÁ×°ÖÃ	ÁÖ¼Î³Ï	2015-11-28	2017-06-09	CN106814869A	Ö÷·ÖÀàºÅ£ºG06F3/02(2006.01)I	ÔÚÉó-¹«¿ª	110006 ÁÉÄþÊ¡ÉòÑôÊÐºÍÆ½ÇøÌ¨±±Â·1-39µ¥ºÅ	±¾·¢Ã÷¹«¿ªÁËÒ»ÖÖ±£»¤ÒøÐÐÃÜÂë·ÀµÁ×°ÖÃ£¬ÆäÌØÕ÷ÔÚÓÚ£ºËùÊöÖ§³ÅÈ¦1¡¢ÏÂÖ§³ÅÈ¦2¡¢ÈíÖÊ°ëÍ¸Ã÷Ì×Í²3¹¹³É£¬ÈíÖÊ°ëÍ¸Ã÷Ì×Í²3µÄÉÏµ×±ß¡¢ÏÂµ×±ß·Ö±ðÓëÉÏÖ§³ÅÈ¦1¡¢ÏÂÖ§³ÅÈ¦2Á¬½Ó¹Ì¶¨£¬ÉÏÖ§³ÅÈ¦1µÄÒ»²à»¹°²×°¹Ì¶¨ÓÐ²Ù×÷°ÑÊÖ4£¬ÈíÖÊ°ëÍ¸Ã÷Ì×Í²3µÄÏÂ²¿¾ßÓÐÊÖÖ¸¿×5£»ËùÊöÕÖÌåºÍ»î¶¯ÑÚ»¤°å×é³É£¬ÕÖÌå³ÊÔ²»¡ÐÎÅï×´£¬ÕÖÌåµÄÁ½¶ËÎª¿ª¿Ú£¬»î¶¯ÑÚ»¤°åÉèÖÃÔÚÕÖÌåÉÏ¡£±¾·¢Ã÷½á¹¹¼òµ¥£¬ÇáÇÉ·½±ã£¬ÓÐÐ§·ÀÖ¹ËûÈËÍµ¿úÃÜÂë£¬¿É½«´æ¿îÃÜÂëÆ÷ÕÖÈëÆäÄÚ£¬ÊäÈëÃÜÂ…	°²È«
ÒøÐÐ·þÎñÆ÷µÇÂ¼Ö¤ÊéµÄÐ£Ñé·½·¨¼°¿Í»§¶Ë	Æ½°²¿Æ¼¼£¨ÉîÛÚ£©ÓÐÏÞ¹«Ë¾	2015-12-11	2017-06-20	CN106874730A	Ö÷·ÖÀàºÅ£ºG06F21/33(2013.01)I	ÔÚÉó-ÊµÖÊÉó²éµÄÉúÐ§	518000 ¹ã¶«Ê¡ÉîÛÚÊÐ¸£ÌïÇø°ËØÔÁë¹¤ÒµÇøÆ½°²´óÏÃÁùÂ¥	±¾·¢Ã÷¹«¿ªÒ»ÖÖÒøÐÐ·þÎñÆ÷µÇÂ¼Ö¤ÊéµÄÐ£Ñé·½·¨¼°¿Í»§¶Ë£¬Í¨¹ýÏìÓ¦ÓÃ»§´¥·¢µÄÏòÒøÐÐ·þÎñÆ÷·¢ËÍÕË»§µÇÂ¼ÇëÇóµÄ²Ù×÷Ö¸Áî£¬´ÓËùÊöÒøÐÐ·þÎñÆ÷ÖÐ½ÓÊÕÐ¯´øÔ¤ÉèÖÖÀàÐÅÏ¢µÄÊý×ÖÖ¤Êé£»½âÎöËùÊöÊý×ÖÖ¤Êé£¬»ñÈ¡ËùÊöÊý×ÖÖ¤ÊéÖÐÐ¯´øµÄËùÊöÔ¤ÉèÖÖÀàÐÅÏ¢£»Ð£Ñé½âÎö³öµÄËùÊöÔ¤ÉèÖÖÀàÐÅÏ¢£»ÈôËùÊöÔ¤ÉèÖÖÀàÐÅÏ¢Í¨¹ýÐ£Ñé£¬Ôò´ÓËùÊöÒøÐÐ·þÎñÆ÷½ÓÊÕËùÊöÕË»§µÇÂ½ÇëÇóËù¶ÔÓ¦µÄ²Ù×÷½çÃæ£»ÈôËùÊöÔ¤ÉèÖÖÀàÐÅÏ¢Ã»ÓÐÍ¨¹ýÐ£Ñé£¬ÔòÀ¹½ØËùÊöÕË»§µÇÂ¼ÇëÇó£¬ºÍ/»òÏÔÊ¾…	°²È«
±àÒë»·¾³°²×°×¢²á·½·¨¼°ÏµÍ³	°¬ÌåÍþ¶ûµç×Ó¼¼Êõ£¨±±¾©£©ÓÐÏÞ¹«Ë¾	2015-12-21	2016-05-25	CN105610570A	Ö÷·ÖÀàºÅ£ºH04L9/00(2006.01)I	ÔÚÉó-ÊµÖÊÉó²éµÄÉúÐ§	100142 ±±¾©ÊÐº£µíÇøÐÓÊ¯¿ÚÂ·¼×18ºÅ2ºÅÂ¥3²ã	±¾·¢Ã÷¹«¿ªÁËÒ»ÖÖ±àÒë»·¾³°²×°×¢²á·½·¨¼°ÏµÍ³£¬Éæ¼°½ðÈÚ°²È«ÁìÓò¡£¸Ã·½·¨°üÀ¨£º×¢²á¶Ë²¶»ñÓÃ»§·¢³öµÄ×¢²á±àÒë»·¾³ÇëÇó£»¼ÆËãµÃµ½·¢³öÇëÇóµÄ×¢²á¶ËËùÊöÔÚµçÄÔºÍÏàÓ¦ÓÃ»§µÄÎ¨Ò»Ð£ÑéÂë£¬È»ºó½«µçÄÔÎ¨Ò»±àÂë¡¢ÓÃ»§ÐÅÏ¢ºÍÎ¨Ò»Ð£ÑéÂë½øÐÐÒ»´ÎÇ©Ãû¼ÓÃÜ£»½«¼ÓÃÜºóµÄÐÅÏ¢·¢ËÍ¸øÉÏ²ã·þÎñÆ÷£¬»ñµÃ¾ßÓÐ×¢²áÈ¨ÏÞµÄÓÃ»§µÄ¼ÓÃÜÐÅÏ¢²¢½«ÓÐÐ§Ðí¿ÉÖ¤·´À¡¸øÓÃ»§ËùÔÚ×¢²á¶Ë£¬ÓÐÐ§Ðí¿ÉÖ¤ºÏ·¨Ôò×¢²á³É¹¦¡£±¾·¢Ã÷ËùÊö·½·¨×¢²á·½±ã¡¢·ÀÖ¹ÓÃ»§¸´ÖÆÈí¼þ²¢Ê¹Ó…	°²È«
Ò»ÖÖ×ÔÖúÖÕ¶ËÉè±¸Ó²¼þµÄ°²È«Í¨ÐÅ·½·¨ºÍ×°ÖÃ	¹ãÖÝ¹ãµçÔËÍ¨½ðÈÚµç×Ó¹É·ÝÓÐÏÞ¹«Ë¾	2015-12-22	2016-05-11	CN105574445A	Ö÷·ÖÀàºÅ£ºG06F21/85(2013.01)I	ÓÐÐ§-ÊÚÈ¨	510663 ¹ã¶«Ê¡¹ãÖÝÊÐÂÜ¸ÚÇø¿ÆÑ§³Ç¿ÆÁÖÂ·9ºÅ	±¾·¢Ã÷ÊµÊ©Àý¹«¿ªÁËÒ»ÖÖ×ÔÖúÖÕ¶ËÉè±¸Ó²¼þµÄ°²È«Í¨ÐÅ·½·¨£¬ÓÃÓÚ½â¾öÏÖÓÐ×ÔÖúÖÕ¶ËÈÝÒ×Ôâµ½·¸×ï·Ö×ÓÍ¨¹ýÈí¼þÄ£ÄâÉè±¸Ó²¼þÓëÖ÷»úÍ¨ÐÅ½øÐÐ½ðÈÚ·¸×ïµÄÎÊÌâ¡£±¾·¢Ã÷ÊµÊ©Àý·½·¨°üÀ¨£º±¾¶Ë»ñÈ¡ÐèÒª·¢ËÍµÄÔ­Ê¼Êý¾Ý£»ËùÊö±¾¶Ë¶ÔËùÊöÔ­Ê¼Êý¾Ý¼ÓÃÜ£¬µÃµ½¼ÓÃÜÊý¾Ý£»ËùÊö±¾¶ËÉú³ÉËæ»úÊý£¬²¢¸ù¾ÝËùÊöËæ»úÊý½«¼ÓÃÜÊý¾ÝÇÐ·ÖÎªÊý¾Ý¿é£»ËùÊö±¾¶Ë½«ËùÊöÊý¾Ý¿éÒ»Ò»´ò°ü£¬Éú³É¶ÔÓ¦µÄÊý¾Ý°ü£»ËùÊö±¾¶Ë½«ËùÊöÊý¾Ý°ü´«ÊäÖÁ¶Ô¶Ë£¬Ê¹µÃËùÊö¶Ô¶Ë½«ËùÊöÊý¾Ý°ü½âÎ…	°²È«
Ð£ÑéÖ§¸¶Êý¾ÝµÄ·½·¨¼°Éè±¸	ÖÐ¹ú½¨ÉèÒøÐÐ¹É·ÝÓÐÏÞ¹«Ë¾	2015-12-24	2016-06-01	CN105631669A	Ö÷·ÖÀàºÅ£ºG06Q20/38(2012.01)I	ÔÚÉó-ÊµÖÊÉó²éµÄÉúÐ§	100032 ±±¾©ÊÐÎ÷³ÇÇø½ðÈÚ´ó½Ö25ºÅ	±¾·¢Ã÷Ìá¹©Ò»ÖÖÐ£ÑéÖ§¸¶Êý¾ÝµÄ·½·¨¼°Éè±¸£¬ËùÊö·½·¨°üÀ¨£º½ÓÊÕ¿Í»§¶Ë·¢ËÍµÄÖ§¸¶Êý¾Ý£»¶ÁÈ¡ÓëËùÊöÖ§¸¶Êý¾Ý¶ÔÓ¦µÄÐ£ÑéÊý¾ÝµÄÖµ£»Ð£ÑéËùÊöÖ§¸¶Êý¾ÝµÄÖµÓëËùÊöÐ£ÑéÊý¾ÝµÄÖµÊÇ·ñÒ»ÖÂ£»ÈôÒ»ÖÂ£¬ÔòÈ·¶¨¶ÔËùÊöÖ§¸¶Êý¾ÝµÄÐ£ÑéÍ¨¹ý¡£ÊµÊ©±¾·¢Ã÷£¬¿ÉÒÔÍ¨¹ý½«¿Í»§¶ËËù·¢ËÍµÄÖ§¸¶Êý¾ÝÓëÐ£ÑéÊý¾Ý½øÐÐÐ£ÑéÀ´·ÀÖ¹Ö§¸¶Êý¾Ý±»´Û¸Ä¡£	Ö§¸¶
Ò»ÖÖÉí·ÝÈÏÖ¤¼°½ðÈÚÖ§¸¶Ò»Ìå»úÖÕ¶Ë	ÄÏ¾©Í¨ºëÁªµç×Ó¿Æ¼¼ÓÐÏÞ¹«Ë¾	2015-12-24	2016-06-01	CN105631292A	Ö÷·ÖÀàºÅ£ºG06F21/32(2013.01)I	ÔÚÉó-ÊµÖÊÉó²éµÄÉúÐ§	210000 ½­ËÕÊ¡ÄÏ¾©ÊÐ½¨ÚþÇøÂ®É½Â·158ºÅ¼ÎÒµ¹ú¼Ê³Ç2ºÅÂ¥2605ÊÒ	±¾·¢Ã÷Ìá¹©Ò»ÖÖÉí·ÝÈÏÖ¤¼°½ðÈÚÖ§¸¶Ò»Ìå»úÖÕ¶Ë£¬°üÀ¨ÒµÎñÆ½Ì¨¡¢Ç¶ÈëÊ½ÖÐÑë´¦ÀíÐ¾Æ¬¡¢Í¨Ñ¶Ä£¿é¡¢Éí·ÝÈÏÖ¤¹ÜÀíÄ£¿éºÍÖ§¸¶¹ÜÀíÄ£¿é£»ÆäÖÐ£¬ÒµÎñÆ½Ì¨¶ÔÍâÌá¹©ÓÃ»§½»»¥½çÃæ£¬Ç¶ÈëÊ½ÖÐÑë´¦ÀíÐ¾Æ¬¼ÓÔØ²Ù×÷ÏµÍ³²¢¸ù¾ÝÒµÎñÇëÇóÍ¨¹ýÈí¼þÇý¶¯ÏàÓ¦¹¦ÄÜÄ£¿é£»Í¨Ñ¶Ä£¿é²ÉÓÃAPN×¨Íø½ÓÈë·½Ê½ÎªËùÊöÉí·ÝÈÏÖ¤¼°½ðÈÚÖ§¸¶Ò»Ìå»úÖÕ¶ËÌá¹©½ÓÈë¹«°²ÄÚÍøºÍÒøÁª×¨ÏßÍøÂçµÄ½Ó¿Ú£»Éí·ÝÈÏÖ¤¹ÜÀíÄ£¿éÊµÏÖÈËÁ³Ê¶±ð¡¢Ö¸ÎÆÐ£ÑéºÍÉí·ÝÖ¤¶ÁÈ¡¹¦ÄÜ£»Ö§¸¶¹ÜÀíÄ£¿é°üÊµÏÖ…	°²È«
Ö§¸¶°²È«É³ÏäÊµÏÖ·½·¨¼°ÏµÍ³ÓëÓ¦ÓÃ³ÌÐò¼à¿Ø·½·¨¼°ÏµÍ³	±±¾©Ææ»¢¿Æ¼¼ÓÐÏÞ¹«Ë¾	2015-12-25	2016-03-23	CN105427096A	Ö÷·ÖÀàºÅ£ºG06Q20/32(2012.01)I	ÔÚÉó-ÊµÖÊÉó²éµÄÉúÐ§	100088 ±±¾©ÊÐÎ÷³ÇÇøÐÂ½Ö¿ÚÍâ´ó½Ö28ºÅD×ù112ÊÒ£¨µÂÊ¤Ô°Çø£©	±¾·¢Ã÷Éæ¼°¼ÆËã»ú¼¼ÊõÁìÓò£¬ÓÈÆäÉæ¼°Ò»ÖÖÖ§¸¶°²È«É³ÏäÊµÏÖ·½·¨¼°ÏµÍ³ÓëÓ¦ÓÃ³ÌÐò½ø³Ì¼à¿Ø·½·¨¼°ÏµÍ³¡£ËùÊö·½·¨°üÀ¨£ºÏìÓ¦ÓÚÓ¦ÓÃ³ÌÐòµÄÔËÐÐÖ¸Áî£¬Í¨¹ý·õ»¯Æ÷¹¹ÔìÐéÄâ»ú³ÉÎªÓÃÓÚÔËÐÐ¸ÃÓ¦ÓÃ³ÌÐòµÄÉ³Ïä£»ÐÞ¸Ä¸ÃÉ³ÏäµÄ»·¾³ÅäÖÃÐÅÏ¢£¬Ê¹ËùÊöÉ³ÏäÊÊÓÚµ÷ÓÃ¼à¿ØÄ£¿é¼à¿ØËùÊöÓ¦ÓÃ³ÌÐòµÄ½ø³Ì£»ÔÚ¸Ã½ø³Ìµ÷ÓÃÌØ¶¨Ö¸ÁîÊ±£¬°´ÕÕ¸ÃÉ³ÏäÔ¤ÏÈÌá¹©µÄ°²È«²ßÂÔ½øÐÐ´¦Àí£¬²¢ÔÚ´¦Àíºó·µ»ØÖ´ÐÐ¸Ã½ø³Ì¡£Òò´Ë£¬±¾·¢Ã÷²»½ö¾ßÓÐ´Óµ×²ãµ½Ó¦ÓÃ²ã¾ù½øÐÐ°²È«·À»¤µÄÐ…	°²È«
°²È«Ð¾Æ¬ÖÐ·ÀÖ¹¹¦ºÄÐ¹Â¶µÄ·½·¨	ÉÏº£»ªºç¼¯³ÉµçÂ·ÓÐÏÞÔðÈÎ¹«Ë¾	2015-12-28	2017-07-04	CN106919833A	Ö÷·ÖÀàºÅ£ºG06F21/55(2013.01)I	ÔÚÉó-ÊµÖÊÉó²éµÄÉúÐ§	201203 ÉÏº£ÊÐÆÖ¶«ÐÂÇø±Ì²¨Â·572Åª39ºÅ	±¾·¢Ã÷¹«¿ªÁËÒ»ÖÖ°²È«Ð¾Æ¬ÖÐ·ÀÖ¹¹¦ºÄÐ¹Â¶µÄ·½·¨£¬°üÀ¨£º²½Öè1£¬¼ÙÉèÔÚÄ³³ÌÐòÖÐ´æÔÚN¸ö»¥²»ÒÀÀµµÄ¹ý³Ì£¬ËùÊöN¸ö¹ý³ÌµÄ³õÊ¼Ö´ÐÐË³ÐòÊÇP[1]¡¢P[2]¡­¡­P[N]£»²½Öè2£¬»ñÈ¡Ò»¸öËæ»úÊýR£»²½Öè3£¬Í¨¹ýËæ»úÊýR¸øN¸ö¹ý³ÌµÄÏÈºóÖ´ÐÐË³ÐòÖØÐÂÅÅÐò£»²½Öè4£¬¸ù¾Ý²½Öè3ÅÅºÃµÄË³ÐòÖ´ÐÐËùÓÐµÄ¹ý³Ì¡£±¾·¢Ã÷ÔÚ³ÌÐòÉè¼Æ½×¶Î½øÐÐÕûÌå¹æ»®£¬°Ñ³ÌÐòÖ´ÐÐ»®·Ö³ÉÈô¸É¸ö»¥²»ÒÀÀµµÄ¹ý³Ì£»Í¬Ê±Í¨¹ýËæ»úÊý´òÂÒËùÓÐ¹ý³ÌµÄÖ´ÐÐË³Ðò£¬Ê¹µÃ¹¥»÷Õß²»ÄÜ×¼È·µØ¶Ô¹ÊÕÏ×¢È…	°²È«
µÇÂ¼ÑéÖ¤´¦Àí·½·¨¡¢×°ÖÃ¼°ÖÕ¶ËÉè±¸	Ð¡Ã×¿Æ¼¼ÓÐÏÞÔðÈÎ¹«Ë¾	2015-12-28	2016-03-23	CN105426730A	Ö÷·ÖÀàºÅ£ºG06F21/32(2013.01)I	ÔÚÉó-ÊµÖÊÉó²éµÄÉúÐ§	100085 ±±¾©ÊÐº£µíÇøÇåºÓÖÐ½Ö68ºÅ»ªÈóÎå²Ê³Ç¹ºÎïÖÐÐÄ¶þÆÚ13²ã	±¾¹«¿ªÊÇ¹ØÓÚÒ»ÖÖµÇÂ¼ÑéÖ¤´¦Àí·½·¨¡¢×°ÖÃ¼°ÖÕ¶ËÉè±¸£¬ÆäÖÐ£¬µÇÂ¼ÑéÖ¤´¦Àí·½·¨£¬°üÀ¨£º»ñÈ¡´ýÑéÖ¤ÓÃ»§µÄµÚÒ»ÈËÁ³ÌØÕ÷ÐÅÏ¢£¬ÔÚ»ñÈ¡¸ÃµÚÒ»ÈËÁ³ÌØÕ÷ÐÅÏ¢µÄÔ¤ÉèÊ±¼ä¶ÎÄÚ£¬²É¼¯¸Ã´ýÑéÖ¤ÓÃ»§µÄµÚÒ»ÈËÁ³¶¯×÷ÐÅÏ¢£¬ÔÚµÚÒ»ÈËÁ³ÌØÕ÷ÐÅÏ¢Óë´æ´¢µÄ´ýÑéÖ¤ÓÃ»§µÄµÚ¶þÈËÁ³ÌØÕ÷ÐÅÏ¢Æ¥Åä£¬²¢ÇÒµÚÒ»ÈËÁ³¶¯×÷ÐÅÏ¢Óë´æ´¢µÄ´ýÑéÖ¤ÓÃ»§µÄµÚ¶þÈËÁ³¶¯×÷ÐÅÏ¢Æ¥ÅäÊ±£¬È·¶¨´ýÑéÖ¤ÓÃ»§Í¨¹ýÑéÖ¤¡£±¾¹«¿ªµÄ¼¼Êõ·½°¸£¬´ýÑéÖ¤ÓÃ»§µÄÈËÁ³ÌØÕ÷ÐÅÏ¢ºÍÈËÁ³¶¯×÷ÐÅÏ¢¾ùÅÐ±…	°²È«
»ùÓÚÑ¹Á¦´¥¿ØµÄÑéÖ¤·½·¨¡¢×°ÖÃ¼°ÖÕ¶Ë	ÓîÁú¼ÆËã»úÍ¨ÐÅ¿Æ¼¼£¨ÉîÛÚ£©ÓÐÏÞ¹«Ë¾	2015-12-29	2016-06-08	CN105653091A	Ö÷·ÖÀàºÅ£ºG06F3/041(2006.01)I	ÔÚÉó-ÊµÖÊÉó²éµÄÉúÐ§	518040 ¹ã¶«Ê¡ÉîÛÚÊÐ³µ¹«ÃíÌì°²ÊýÂë³Ç´´ÐÂ¿Æ¼¼¹ã³¡B×ù8Â¥	±¾·¢Ã÷Ìá³öÁËÒ»ÖÖ»ùÓÚÑ¹Á¦´¥¿ØµÄÑéÖ¤·½·¨¡¢×°ÖÃ¼°ÖÕ¶Ë£¬ÆäÖÐ£¬»ùÓÚÑ¹Á¦´¥¿ØµÄÑéÖ¤·½·¨°üÀ¨£º½ÓÊÕÓÃ»§¶ÔÖÕ¶Ë´¥ÃþÆÁÔ¤»®·ÖµÄ¶à¸ö´¥¿ØÇøÓòÖÐµÄÖÁÉÙÒ»¸öÔ¤Éè´¥¿ØÇøÓòµÄ°´Ñ¹²Ù×÷ÊÂ¼þ£»¼ì²âËùÊö°´Ñ¹²Ù×÷ÊÂ¼þÊÇ·ñÂú×ãÔ¤ÉèÑéÖ¤Ìõ¼þ£»µ±¼ì²â½á¹ûÎªÊÇÊ±£¬Í¨¹ýÑéÖ¤£¬µ±ËùÊö¼ì²â½á¹ûÎª·ñÊ±£¬½ûÖ¹Í¨¹ýÑéÖ¤¡£Í¨¹ý±¾·¢Ã÷µÄ¼¼Êõ·½°¸£¬½«´¥ÃþÆÁÎ»ÖÃÓë´¥¿ØµÄÑ¹Á¦Öµ½áºÏÆðÀ´£¬×é³ÉË«ÖØ¼ÓÃÜ£¬ÌáÉýÁËÑéÖ¤µÄ¼ÓÃÜ³Ì¶È£¬ÌáÉýÁËÖÕ¶Ë½âËø¼°Ö§¸¶ÑéÖ¤µÈ²Ù×÷µÄ°…	°²È«
Ò»ÖÖ½ðÈÚIC¿¨ÃÜÔ¿¹ÜÀíÏµÍ³	ÖÐ¹ú½¨ÉèÒøÐÐ¹É·ÝÓÐÏÞ¹«Ë¾	2015-12-29	2016-06-01	CN105634730A	Ö÷·ÖÀàºÅ£ºH04L9/08(2006.01)I	ÔÚÉó-ÊµÖÊÉó²éµÄÉúÐ§	100033 ±±¾©ÊÐÎ÷³ÇÇø½ðÈÚ´ó½Ö25ºÅ	±¾ÉêÇëÌá¹©ÁËÒ»ÖÖ½ðÈÚIC¿¨ÃÜÔ¿¹ÜÀíÏµÍ³£¬ÎªÁË±£Ö¤¸Ã½ðÈÚIC¿¨µÄ°²È«£¬·¢¿¨ÐÐÃÜÔ¿¹ÜÀíÖÐÐÄ½«ÏòÈÏÖ¤ÖÐÐÄ·¢Æð·¢¿¨ÐÐ¸ùÖ¤ÊéÇ©ÃûÇëÇó£¬´Ó¶øÊ¹¸ÃÈÏÖ¤ÖÐÐÄ¾Ý´Ë½«·¢¿¨ÐÐÖ¤Êé·´À¡ÖÁ¸Ã·¢¿¨ÐÐÃÜÔ¿¹ÜÀíÖÐÐÄ£¬ÒÔÊ¹¸Ã·¢¿¨ÐÐÃÜÔ¿¹ÜÀíÖÐÐÄ¾Ý´ËÇ©·¢IC¿¨Ö¤Êé£¬Í¬Ê±£¬¸Ã·¢¿¨ÐÐÃÜÔ¿¹ÜÀíÖÐÐÄ»¹»á²úÉúÂú×ã½ðÈÚIC¿¨ÐèÒªµÄÈÏÖ¤Ë½Ô¿£¬Èç¸÷ÖÖÏû·ÑÃÜÔ¿µÈ£¬²¢½«µÃµ½µÄÕâÐ©ÃÜÔ¿ÐÅÏ¢£¬ÈçÈÏÖ¤Ë½Ô¿¡¢IC¿¨Ö¤ÊéÒÔ¼°·¢¿¨ÐÐÖ¤ÊéµÈµÈÍ¨¹ý·¢¿¨ÖÐÐÄ¼ÓÔØÖÁ½ðÈÚIC¿¨£¬ÒÔ±£Ö¤¸…	°²È«
Ó¦ÓÃÓÚÔÆ¶ËÖ§¸¶ÒµÎñµÄÊý¾Ý´æ´¢·½·¨¼°×°ÖÃ	ÉîÛÚÇ°º£Î¢ÖÚÒøÐÐ¹É·ÝÓÐÏÞ¹«Ë¾	2015-12-31	2016-06-22	CN105701423A	Ö÷·ÖÀàºÅ£ºG06F21/78(2013.01)I	ÓÐÐ§-ÊÚÈ¨	518000 ¹ã¶«Ê¡ÉîÛÚÊÐÇ°º£Éî¸ÛºÏ×÷ÇøÇ°ÍåÒ»Â·1ºÅA¶°201ÊÒ(Èë×¤ÉîÛÚÊÐÇ°º£ÉÌÎñÃØÊéÓÐÏÞ¹«Ë¾)	±¾·¢Ã÷¹«¿ªÁËÒ»ÖÖÓ¦ÓÃÓÚÔÆ¶ËÖ§¸¶ÒµÎñµÄÊý¾Ý´æ´¢·½·¨£¬ÔÚÖ§¸¶Èí¼þÖÐ½ÓÊÕµ½Êý¾Ý´æ´¢Ö¸ÁîÊ±£¬½ÓÊÕ´ý´æ´¢Êý¾Ý£¬ÆäÖÐ£¬ËùÊö´ý´æ´¢Êý¾Ý°üÀ¨Ö§¸¶Èí¼þÖÐµÄÕË»§¹ØÁªÊý¾Ý£¬ÒÔ¼°ÓÃÓÚ¸ú·þÎñÆ÷½øÐÐÍ¨Ñ¶ºÍÉú³É½»Ò×ÃÜÎÄÊý¾ÝµÄÏÞÖÆÃÜÔ¿£»µ÷ÓÃËùÊöÖÕ¶ËµÄ±êÊ¶ÐÅÏ¢ÒÔÉú³É¼ÓÃÜÃÜÔ¿£¬²¢¸ù¾ÝËùÊö¼ÓÃÜÃÜÔ¿¶ÔËùÊö´ý´æ´¢Êý¾Ý½øÐÐ¼ÓÃÜ´æ´¢£»ÔÚËùÊö´ý´æ´¢Êý¾Ý´æ´¢³É¹¦Ê±£¬É¾³ýËùÊö¼ÓÃÜÃÜÔ¿¡£·¢Ã÷»¹¹«¿ªÁËÒ»ÖÖÓ¦ÓÃÓÚÔÆ¶ËÖ§¸¶ÒµÎñµÄÊý¾Ý´æ´¢×°ÖÃ¡£±¾·¢Ã÷Ìá¸ßÁËÖ…	°²È«
Ò»ÖÖ°²È«Õï¶Ï·½·¨¡¢×°ÖÃ¼°µç×ÓÉè±¸	±±¾©½ðÉ½°²È«Èí¼þÓÐÏÞ¹«Ë¾	2015-12-31	2017-07-07	CN106934286A	Ö÷·ÖÀàºÅ£ºG06F21/56(2013.01)I	ÔÚÉó-ÊµÖÊÉó²éµÄÉúÐ§	100085 ±±¾©ÊÐº£µíÇøÐ¡ÓªÎ÷Â·33ºÅ¶þ²ã¶«Çø	±¾·¢Ã÷ÊµÊ©ÀýÌá¹©ÁËÒ»ÖÖ°²È«Õï¶Ï·½·¨¡¢×°ÖÃ¼°µç×ÓÉè±¸£¬½ÓÊÕ°²È«Õï¶ÏÖ¸Áî£¬ÏìÓ¦ËùÊö°²È«Õï¶ÏÖ¸Áî£¬»ñµÃËùÊöµç×ÓÉè±¸ÖÐµÄ¸÷´ýÈ·¶¨¶ÔÏóµÄÌØÕ÷ÐÅÏ¢£¬½«ËùÊöÌØÕ÷ÐÅÏ¢·¢ËÍÖÁÔÆ¶Ë·þÎñÆ÷£¬ÒÔÊ¹ËùÊöÔÆ¶Ë·þÎñÆ÷ÔÚ½ÓÊÕµ½ËùÊöÌØÕ÷ÐÅÏ¢ºó£¬»ùÓÚËùÊöÌØÕ÷ÐÅÏ¢£¬È·¶¨ËùÊöµç×ÓÉè±¸Ëù¶ÔÓ¦µÄ°²È«Õï¶Ï´¦Àí²ßÂÔ£¬²¢½«ËùÈ·¶¨µÄ°²È«Õï¶Ï½á¹ûºÍ´¦Àí²ßÂÔ·¢ËÍÖÁËùÊöµç×ÓÉè±¸£¬½ÓÊÕËùÊöÔÆ¶Ë·þÎñÆ÷Ëù·¢ËÍµÄËùÊö°²È«Õï¶Ï½á¹ûºÍ´¦Àí²ßÂÔ¡£ÓëÏÖÓÐ¼¼ÊõÏà±È£¬±¾·¢Ã…	°²È«
Ò»ÖÖ»ùÓÚÖ§¸¶±¦·þÎñ´°µÄ½¡¿µ¼ì²éÊý¾Ý²éÑ¯·½·¨¼°ÏµÍ³	½­ËÕî£²©ÐÅÏ¢¿Æ¼¼ÓÐÏÞ¹«Ë¾	2015-12-31	2016-06-22	CN105700909A	Ö÷·ÖÀàºÅ£ºG06F9/445(2006.01)I	ÓÐÐ§-ÊÚÈ¨	226300 ½­ËÕÊ¡ÄÏÍ¨ÊÐÍ¨ÖÝÇø½ðÉ³Õò½¨ÉèÂ·41ºÅÎï×Ê´óÏÃËÄÂ¥	±¾·¢Ã÷¹«¿ªÁËÒ»ÖÖ»ùÓÚÖ§¸¶±¦·þÎñ´°µÄ½¡¿µ¼ì²éÊý¾Ý²éÑ¯·½·¨¼°ÏµÍ³£¬ÆäÖÐ¸Ã·½·¨°üÀ¨£ºÆô¶¯½¡¿µÓ¦ÓÃ³ÌÐò£¬½øÈëÁÙÊ±¶þÎ¬ÂëÏÔÊ¾½çÃæ£¬¸Ã½çÃæÉÏÏÔÊ¾ÓÐÁÙÊ±¶þÎ¬Âë£»Æô¶¯Ö§¸¶±¦Ó¦ÓÃ³ÌÐò£¬É¨Ãè²¢½âÂëËùÊöÁÙÊ±¶þÎ¬Âë£»Ö§¸¶±¦·þÎñÆ½Ì¨ÓÃ»§Ö§¸¶±¦×¢²áÐÅÏ¢·¢ËÍÖÁµÚÒ»ÒÆ¶¯ÖÕ¶Ë£»µÚÒ»ÒÆ¶¯ÖÕ¶Ë¸ù¾ÝËùÊöÓÃ»§Ö§¸¶±¦×¢²áÐÅÏ¢µÇÈë½¡¿µÓ¦ÓÃ³ÌÐò£»µÚÒ»ÒÆ¶¯ÖÕ¶Ë»ñÈ¡ÓÃ»§µÄ½¡¿µ¼ì²éÊý¾Ý²¢ÉÏ´«ÍÆËÍÖÁµÚ¶þÒÆ¶¯ÖÕ¶Ë£»½øÈëÖ§¸¶±¦·þÎñ´°½çÃæÖÐµÄ½¡¿µ¼ÇÂ¼²éÑ¯½çÃ…	Ö§¸¶
Ò»ÖÖÓÃÓÚÍøÂç½»Ò×µÄ°²È«¼üÅÌ	ÖÐ¹úµç×Ó¿Æ¼¼¼¯ÍÅ¹«Ë¾µÚÈýÊ®ÑÐ¾¿Ëù	2016-01-08	2016-04-06	CN105468957A	Ö÷·ÖÀàºÅ£ºG06F21/33(2013.01)I	ÔÚÉó-ÊµÖÊÉó²éµÄÉúÐ§	610000 ËÄ´¨Ê¡³É¶¼ÊÐ¸ßÐÂÇø´´ÒµÂ·6ºÅ	±¾·¢Ã÷Ìá¹©ÁËÒ»ÖÖÓÃÓÚÍøÂç½»Ò×µÄ°²È«¼üÅÌ¡£°üÀ¨°²È«¼üÅÌ¿Ø¼þ¡¢°²È«¹ÜÀí·þÎñÄ£¿é¡¢¹ÜÀíÖÐÐÄÄ£¿éÈý²¿·Ö£»°²È«¼üÅÌ¿Ø¼þÓë°²È«¹ÜÀí·þÎñÄ£¿éÍ¨ÐÅÁ¬½Ó£¬°²È«¹ÜÀí·þÎñÄ£¿éÓë¹ÜÀíÖÐÐÄÄ£¿éÍ¨ÐÅÁ¬½Ó£¬Ó¦ÓÃAPPÓëÓ¦ÓÃÍøÕ¾Í¨ÐÅÁ¬½Ó£¬¹ÜÀíÖÐÐÄÄ£¿éÓëÓ¦ÓÃÍøÕ¾Í¨ÐÅÁ¬½Ó¡£±¾·¢Ã÷²ÉÓÃSDK·½Ê½Ò×ÓÚ²¿ÊðºÍÊµÏÖ£¬±ÜÃâÁË½ðÈÚÓ¦ÓÃ¡¢µçÉÌÓ¦ÓÃµÈÃô¸ÐÓ¦ÓÃ¿ª·¢°²È«¼üÅÌµÄ¸´ÔÓ¶È¡£ÄÜ¹»µÖÓù±¾µØ¹¥»÷¡¢ÁÙ½ü¹¥»÷¡¢ÍøÂç¹¥»÷µÈ¶àÖÖ¹¥»÷·½Ê½¡£Ö§³Ö±¾µØÈÏÖ¤¡¢ÔÚÏßÈÏÖ¤µ…	°²È«
Ò»ÖÖÖ¸ÎÆ¼ÓÃÜEID½ðÈÚ¿¨¼°ÊµÏÖ·½·¨	ËïÁ¢Ãñ	2016-01-15	2016-08-31	CN105913110A	Ö÷·ÖÀàºÅ£ºG06K19/077(2006.01)I	ÔÚÉó-¹«¿ª	100123 ±±¾©ÊÐ³¯ÑôÇøÒ¦¼ÒÔ°¶«ÀïÒÝ´äÔ°2ºÅÔº2-2-302	±¾·¢Ã÷µÄÄ¿µÄÊÇÌá¹©Ò»ÖÖÖ¸ÎÆ¼ÓÃÜEID½ðÈÚ¿¨¼°ÊµÏÖ·½·¨£¬ÆäÄÜ¹»ÔÚEID½ðÈÚ¿¨ÄÚ²¿µÄ¼ÓÃÜÐ¾Æ¬ÖÐÍê³ÉÓÃ»§µÄÖ¸ÎÆÈÏÖ¤£¬²¢½«ÈÏÖ¤ÐÅÏ¢Í¨¹ýISO7816±ê×¼½Ó¿Ú¾­¹ý¼ÓÃÜ´«ËÍÖÁ¿ØÖÆÆ÷£¬ÓÉ¸Ã¿ØÖÆÆ÷¸ù¾Ý¼ÓÃÜÐÅÏ¢À´¿ØÖÆ½ðÈÚ¿¨Ð¾Æ¬µÄ¼¤»î£¬²¢µ¼Í¨½ðÈÚ¿¨Ð¾Æ¬ÓëÍâ²¿½Ó¿Ú£¬ËùÊöEID½ðÈÚ¿¨µÄEIDÐÅÏ¢´æ´¢ÔÚ¿¨ÄÚµÄ½ðÈÚ¿¨Ð¾Æ¬ÖÐ£¬ËùÊöEIDÐÅÏ¢Í¨¹ýÓëEIDÍ³Ò»ÈÏÖ¤·þÎñÏµÍ³½øÐÐÐÅÏ¢½»»¥£¬½øÐÐÓÃ»§Éí·ÝÑéÖ¤£¬Ö»ÓÐÔÚÓÃ»§Í¨¹ýÁËÖ¸ÎÆÑéÖ¤ºÍEIDÉí·ÝÑéÖ¤ÈÏÖ¤Ö®ºó²ÅÄÜÕý³…	°²È«
Ò»ÖÖÖ¸ÎÆ¼ÓÃÜEID½ðÈÚ¿¨¼°ÊµÏÖ·½·¨	ËïÁ¢Ãñ	2016-01-15	2016-08-31	CN105913109A	Ö÷·ÖÀàºÅ£ºG06K19/077(2006.01)I	ÔÚÉó-¹«¿ª	100123 ±±¾©ÊÐ³¯ÑôÇøÒ¦¼ÒÔ°¶«ÀïÒÝ´äÔ°2ºÅÔº2-2-302	±¾·¢Ã÷µÄÄ¿µÄÊÇÌá¹©Ò»ÖÖÖ¸ÎÆ¼ÓÃÜEID½ðÈÚ¿¨¼°ÊµÏÖ·½·¨£¬ÆäÄÜ¹»ÔÚEID½ðÈÚ¿¨ÄÚ²¿µÄ¼ÓÃÜÐ¾Æ¬ÖÐÍê³ÉÓÃ»§µÄÖ¸ÎÆÈÏÖ¤£¬²¢½«ÈÏÖ¤ÐÅÏ¢Í¨¹ýISO7816±ê×¼½Ó¿Ú¾­¹ý¼ÓÃÜ´«ËÍÖÁ¿ØÖÆÆ÷£¬ÓÉ¸Ã¿ØÖÆÆ÷¸ù¾Ý¼ÓÃÜÐÅÏ¢À´¿ØÖÆ½ðÈÚ¿¨Ð¾Æ¬µÄ¼¤»î£¬²¢µ¼Í¨½ðÈÚ¿¨Ð¾Æ¬ÓëÍâ²¿½Ó¿Ú£¬ËùÊöEID½ðÈÚ¿¨µÄEIDÐÅÏ¢´æ´¢ÔÚ¿¨ÄÚµÄ½ðÈÚICÐ¾Æ¬ÖÐ£¬ËùÊö?EIDÐÅÏ¢Í¨¹ýÓëEID?Í³Ò»ÈÏÖ¤·þÎñÏµÍ³½øÐÐÐÅÏ¢½»»¥£¬½øÐÐÓÃ»§Éí·ÝÑéÖ¤£¬Ö»ÓÐÔÚÓÃ»§Í¨¹ýÁËÖ¸ÎÆÑéÖ¤ºÍEIDÉí·ÝÑéÖ¤ÈÏÖ¤Ö®ºó²ÅÄÜÕ…	°²È«
»ùÓÚ¶àÒòËØ¡¢¶àÒýÇæ¡¢ÈË»úÏà½áºÏµÄÉí·ÝÑéÖ¤·½·¨ÓëÏµÍ³	±±¾©ÐÅ°²ÃË¿Æ¼¼ÓÐÏÞ¹«Ë¾	2016-01-20	2016-07-06	CN105740683A	Ö÷·ÖÀàºÅ£ºG06F21/32(2013.01)I	ÓÐÐ§-ÊÚÈ¨	100080 ±±¾©ÊÐº£µíÇøÖÐ¹Ø´å´ó½Ö11ºÅÖÐ¹Ø´åEÊÀ½çC×ù745	±¾·¢Ã÷Ìá¹©Ò»ÖÖ»ùÓÚ¶àÒòËØ¡¢¶àÒýÇæ¡¢ÈË»úÏà½áºÏµÄÉí·ÝÑéÖ¤·½·¨£¬°üÀ¨£º»ñÈ¡µ½µ±Ç°ÓÃ»§Ìá¹©µÄÖÁÉÙÁ½¸öÀà±ðµÄÉúÎïÌØÕ÷ÐÅÏ¢£»²ÉÓÃ¶àÖÖ²»Í¬µÄÊ¶±ð·½·¨¶ÔÃ¿¸öÀà±ðµÄÉúÎïÌØÕ÷ÐÅÏ¢½øÐÐÊ¶±ð£¬ÔÚ¾­¹ýÆ¥Åäºó£¬·Ö±ðµÃ³ö¶à¸öÊ¶±ð½á¹û£»½«µÃ³öµÄËùÓÐÊ¶±ð½á¹û½øÐÐÈÚºÏ£¬ÒÔµÃ³öÈÚºÏ½á¹û£¬¶ÔÈÚºÏ½á¹û½øÐÐ¾ö²ß£¬²¢¸ù¾Ý¾ö²ß½á¹ûÒÔµÃ³öµ±Ç°ÓÃ»§µÄÉí·ÝÑéÖ¤½á¹û£»Èô¾ö²ß½á¹ûÎªÊôÓÚ»³ÒÉÇø¼ä£¬Ôò²ÉÓÃÈË¹¤ÑéÖ¤·½Ê½¶ÔÉúÎïÌØÕ÷ÐÅÏ¢½øÐÐÑéÖ¤£¬²¢ÒÔÈË¹¤ÑéÖ¤½á¹…	°²È«
Ò»ÖÖÖÇÄÜ¿¨¼ÓÃÜ»ú¼à¿Ø×°ÖÃ¼°·½·¨	¶«ÐÅºÍÆ½¿Æ¼¼¹É·ÝÓÐÏÞ¹«Ë¾	2016-01-22	2016-06-08	CN105653965A	Ö÷·ÖÀàºÅ£ºG06F21/60(2013.01)I	ÓÐÐ§-ÊÚÈ¨	519060 ¹ã¶«Ê¡Öéº£ÊÐÄÏÆÁ¿Æ¼¼¹¤ÒµÔ°ÆÁ¹¤ÖÐÂ·8ºÅ	±¾·¢Ã÷ÊµÊ©Àý¹«¿ªÁËÒ»ÖÖÖÇÄÜ¿¨¼ÓÃÜ»ú¼à¿Ø×°ÖÃ¼°·½·¨£¬½â¾öÁËÄ¿Ç°µÄ¼ÓÃÜ»úÈË¹¤ÅäÖÃµÄ·½Ê½£¬ÓÉÓÚ¼à¹ÜÈ±·¦£¬¶øµ¼ÖÂµÄ¼ÓÃÜ»ú¹¤×÷ÖÐ°²È«ÐÔµÍµÄ¼¼ÊõÎÊÌâ¡£±¾·¢Ã÷ÊµÊ©ÀýÖÇÄÜ¿¨¼ÓÃÜ»ú¼à¿Ø×°ÖÃ°üÀ¨£º¼ÓÃÜ»úºÍ°²È«Ä£¿é£»¼ÓÃÜ»úÓë°²È«Ä£¿éÍ¨¹ýÍ¨ÐÅ½Ó¿ÚÁ¬½Ó£»ÆäÖÐ£¬µ±°²È«Ä£¿éÓëÍâ²¿Éè±¸Í£Ö¹Í¨ÐÅÊ±£¬¼ÓÃÜ»úÓÃÓÚ¶ÁÈ¡°²È«Ä£¿éÖÐµÄÖ¸¶¨Êý¾ÝÓòµÄ×´Ì¬Öµ£¬ÓëÔ¤ÖÃµÄ·çÏÕµÈ¼¶½øÐÐÅä¶Ô£¬²¢Ö´ÐÐÓëÅä¶ÔºóµÄ·çÏÕµÈ¼¶Ïà¶ÔÓ¦µÄÖ´ÐÐÃüÁî¡£	°²È«
ÐÅÏ¢´¦Àí·½·¨¡¢µÚÒ»ÖÕ¶Ë¡¢µÚ¶þÖÕ¶Ë¡¢·þÎñÆ÷¼°ÏµÍ³	ÌÚÑ¶¿Æ¼¼£¨ÉîÛÚ£©ÓÐÏÞ¹«Ë¾	2016-01-26	2016-06-08	CN105653909A	Ö÷·ÖÀàºÅ£ºG06F21/16(2013.01)I	ÓÐÐ§-ÊÚÈ¨	518000 ¹ã¶«Ê¡ÉîÛÚÊÐ¸£ÌïÇøÕñÐËÂ·Èü¸ñ¿Æ¼¼Ô°2¶°¶«403ÊÒ	±¾·¢Ã÷¹«¿ªÁËÒ»ÖÖÐÅÏ¢´¦Àí·½·¨¡¢µÚÒ»ÖÕ¶Ë¡¢µÚ¶þÖÕ¶Ë¡¢·þÎñÆ÷¼°ÏµÍ³£¬ÆäÖÐ£¬ËùÊö·½·¨°üÀ¨£ºÔÚËùÊöÓ¦ÓÃµÄÐÅÏ¢·¢ËÍ½çÃæÑ¡ÔñµÚÒ»Í¼Æ¬²¢ÉÏ´«£¬¸ù¾ÝËùÊöµÚÒ»Í¼Æ¬Éú³ÉµÚÒ»ÇëÇó£»·¢ËÍËùÊöµÚÒ»ÇëÇó¸ø·þÎñÆ÷£¬ÇëÇóËùÊö·þÎñÆ÷¶ÔËùÊöµÚÒ»ÇëÇóÖÐµÄµÚÒ»Í¼Æ¬½øÐÐ¼ÓÃÜ´¦Àí£¬ÒÔ½«¼ÓÃÜ´¦ÀíºóµÃµ½µÄµÚ¶þÍ¼Æ¬ÏÔÊ¾ÓÚÔËÐÐÓÚµÚ¶þÖÕ¶ËµÄÓ¦ÓÃµÄÐÅÏ¢³ÊÏÖ½çÃæ£»½ÓÊÕµÚ¶þÖÕ¶Ë·´À¡µÄ°üÀ¨Ö§¸¶ÐÅÏ¢£¬ËùÊöÖ§¸¶ÐÅÏ¢ÓÉËùÊöµÚ¶þÖÕ¶Ë¶ÔËùÊöÐÅÏ¢³ÊÏÖ½çÃæµÄÐÅÏ¢½øÐÐÏìÓ¦Ë…	Ö§¸¶
Ò»ÖÖÐÅÏ¢´¦Àí·½·¨¡¢µÚÒ»ÖÕ¶Ë¡¢µÚ¶þÖÕ¶Ë¼°·þÎñÆ÷	ÌÚÑ¶¿Æ¼¼£¨ÉîÛÚ£©ÓÐÏÞ¹«Ë¾	2016-01-26	2016-06-15	CN105681309A	Ö÷·ÖÀàºÅ£ºH04L29/06(2006.01)I	ÓÐÐ§-ÊÚÈ¨	518000 ¹ã¶«Ê¡ÉîÛÚÊÐ¸£ÌïÇøÕñÐËÂ·Èü¸ñ¿Æ¼¼Ô°2¶°¶«403ÊÒ	±¾·¢Ã÷¹«¿ªÁËÒ»ÖÖÐÅÏ¢´¦Àí·½·¨¡¢µÚÒ»ÖÕ¶Ë¡¢µÚ¶þÖÕ¶Ë¼°·þÎñÆ÷£¬ÆäÖÐ£¬ËùÊö·½·¨°üÀ¨£ºÔÚËùÊöÓ¦ÓÃµÄÐÅÏ¢·¢ËÍ½çÃæÑ¡ÔñµÚÒ»Í¼Æ¬²¢ÉÏ´«£¬¸ù¾ÝËùÊöµÚÒ»Í¼Æ¬Éú³ÉµÚÒ»ÇëÇó£»·¢ËÍËùÊöµÚÒ»ÇëÇó¸ø·þÎñÆ÷£¬ÇëÇóËùÊö·þÎñÆ÷¶ÔËùÊöµÚÒ»ÇëÇóÖÐµÄµÚÒ»Í¼Æ¬½øÐÐ¼ÓÃÜ´¦Àí£¬ÒÔ½«¼ÓÃÜ´¦ÀíºóµÃµ½µÄµÚ¶þÍ¼Æ¬ÏÔÊ¾ÓÚÔËÐÐÓÚµÚ¶þÖÕ¶ËµÄÓ¦ÓÃµÄÐÅÏ¢³ÊÏÖ½çÃæ£»ËùÊöµÚ¶þÍ¼Æ¬ÎªÍ¨¹ýÕÚÑÚ²ßÂÔäÖÈ¾Éú³ÉµÄÍ¼Æ¬ÉÏ¸²¸ÇÍ¼²ãµÄ³ÊÏÖÐÎÊ½£¬ÓëÓ¦ÓÃµÄÐÅÏ¢³ÊÏÖ½çÃæÖÐÆäËûÍ¼Æ¬µÄÇåÎ…	Ö§¸¶
Ò»ÖÖ¾ßÓÐÖ¸ÎÆÊ¶±ð¹¦ÄÜµÄÎÞÏßU¶Ü¼°ÆäÊ¹ÓÃ·½·¨	À¥Ã÷ÎÒÐÐ¿Æ¼¼ÓÐÏÞ¹«Ë¾	2016-01-28	2017-08-04	CN107016274A	Ö÷·ÖÀàºÅ£ºG06F21/34(2013.01)I	ÔÚÉó-¹«¿ª	650031 ÔÆÄÏÊ¡À¥Ã÷ÊÐÎå»ªÇøÑ§¸®Â·690ºÅ½ð¶¦¿Æ¼¼Ô°ÄÚ2ºÅÆ½Ì¨£Â£±´±£·Â¥723ºÅ	±¾·¢Ã÷ÊµÊ©ÀýÌá¹©Ò»ÖÖ¾ßÓÐÖ¸ÎÆÊ¶±ð¹¦ÄÜµÄÎÞÏßU¶Ü¼°ÆäÊ¹ÓÃ·½·¨£¬¸ÃU¶Ü°üÀ¨Î¢¿ØÖÆÆ÷¡¢Í¨Ñ¶µ¥Ôª¡¢NFCµ¥Ôª¡¢Ö¸ÎÆÊäÈëµ¥Ôª¡¢Ö¤Êé´æ´¢µ¥Ôª¡¢LCDÏÔÊ¾µ¥Ôª¡¢Ö¸ÎÆ´æ´¢µ¥Ôª¡¢µçÔ´µ¥Ôª£»¸ÃU¶Ü¿É´æ´¢¶à¼ÒÒøÐÐ°ä·¢µÄÍøÒøÊý×ÖÖ¤Êé£¬¿ÉÒÔÁ¬½Ó¼ÆËã»ú¡¢ÖÇÄÜÊÖ»ú¡¢Æ½°åµçÄÔµÈ½øÐÐÍøÉÏÒøÐÐÖ§¸¶½»Ò×£¬Ò²¿ÉÒÔÁ¬½ÓPOS»ú½øÐÐÏÖ³¡Ö§¸¶½»Ò×£»s¸ÃU¶Ü½ÓÊÕÏÔÊ¾½»Ò×Êý¾Ý£¬ÏÔÊ¾ÊäÈëÖ¸ÎÆµÄÌáÊ¾ÐÅÏ¢ÌáÊ¾ÓÃ»§ÊäÈëÖ¸ÎÆ£¬¶ÁÈ¡ÓÃ»§ÊäÈëµÄÖ¸ÎÆÌØÕ÷Êý¾Ý£¬Óë´æ´¢µÄÖ¸ÎÆÌØÕ…	°²È«
Ò»ÖÖ¶àÖØ±£ÏÕµÄÉí·ÝÈÏÖ¤·½·¨	ÔÆÄÏ´óÑ§	2016-02-02	2016-06-01	CN105631272A	Ö÷·ÖÀàºÅ£ºG06F21/31(2013.01)I	ÓÐÐ§-ÊÚÈ¨	650091 ÔÆÄÏÊ¡À¥Ã÷ÊÐ´äºþ±±Â·2ºÅ	±¾·¢Ã÷Ò»ÖÖ¶àÖØ±£ÏÕµÄÉí·ÝÈÏÖ¤·½·¨£¬Éæ¼°¶àÖØ±£ÏÕµÄÉí·ÝÈÏÖ¤·½·¨¼¼ÊõÁìÓò¡£±¾·¢Ã÷µÄ¼¼Êõ·½°¸°üÀ¨ÈçÏÂ²½Öè£¬1)²É¼¯ÓÃ»§ÈËÁ³Í¼Ïñ£»2)²É¼¯ÓÃ»§ÊÖÐ´Ç©ÃûÍ¼Ïñ£»3)ÉèÖÃÃÜÂë£»4)´Ó²É¼¯µÄÈËÁ³Í¼Ïñ¼¯ºÍÊÖÐ´Ç©ÃûÍ¼Ïñ¼¯ÖÐ·Ö±ðÌáÈ¡ÈËÁ³Í¼ÏñÌØÕ÷ºÍÊÖÐ´Ç©ÃûÍ¼ÏñÌØÕ÷£»5)¶ÔÈËÁ³Í¼ÏñÌØÕ÷ºÍÊÖÐ´Ç©ÃûÍ¼ÏñÌØÕ÷½øÐÐÌØÕ÷Ñ¡Ôñ£»6)²ÉÓÃÖ§³ÖÏòÁ¿»ú·ÖÀàÆ÷½øÐÐ·ÖÀà£»7)²½Öè6)ÖÐÖ§³ÖÏòÁ¿»ú·ÖÀàÆ÷µÄÊ¶±ð½á¹ûÕýÈ·¼°ÃÜÂëÊäÈëÕýÈ·£¬¼´ÑéÖ¤³É¹¦£¬·ñÔòÊ§°Ü¡£²ÉÓÃ±¾·…	°²È«
Ó¦ÓÃÓÚµç¶¯³µ³äµç×®µÄÈËÌåÖ¸ÎÆÖ§¸¶ÏµÍ³	ÅíÏþÃ·	2016-02-04	2016-06-01	CN105634089A	Ö÷·ÖÀàºÅ£ºH02J7/02(2016.01)I	ÓÐÐ§-ÊÚÈ¨	063000 ºÓ±±Ê¡ÌÆÉ½ÊÐ½¨Éè±±Â·9ºÅ	±¾·¢Ã÷Éæ¼°Ò»ÖÖÓ¦ÓÃÓÚµç¶¯³µ³äµç×®µÄÈËÌåÖ¸ÎÆÖ§¸¶ÏµÍ³£¬°üÀ¨Ê¶±ðÉè±¸¡¢GPRSÍ¨ÐÅ½Ó¿Ú¡¢µç¶¯³µÊ¶±ðÉè±¸ºÍÊý×ÖÐÅºÅ´¦ÀíÆ÷£¬ÉäÆµÊ¶±ðÉè±¸ÓÃÓÚÊ¶±ð³äµç×®¸½½üµÀÂ·µÄÆû³µÄ¿±ê£¬³äµç×®ºóÌ¨·þÎñÆ÷½ÓÈëµÚÈý·½Ö§¸¶·þÎñÆ÷£»³äµç»úÖ÷Ìå½ÓÈëµçÍø£»³äµç»úÖ÷ÌåÓÃÓÚ½«µçÍøµÄµçÄÜ×ª»¯Îªµç¶¯³µµç³Ø³äµçµÄµçÄÜ£»³äµç×®ºóÌ¨·þÎñÆ÷ÓÃÓÚ´æ´¢ÓÃ»§µÄÕË»§ÐÅÏ¢£¬Í¨¹ýµÚÈý·½Ö§¸¶·þÎñÆ÷½øÐÐ³äµçµç·Ñ½áËãÒÔ¼°¼à¿Ø³äµç×®ÏÖ³¡£»µÚÈý·½Ö§¸¶·þÎñÆ÷ÓÃÓÚµÚÈý·½Ö§¸¶Æ½Ì…	Ö§¸¶
Ò»ÖÖ»ùÓÚÍ¼Ïñ¼ÓÃÜµÄATM°²È«ÈÏÖ¤·½·¨	ÖØÇì¹ã²¥µçÊÓ´óÑ§	2016-02-05	2016-07-13	CN105760727A	Ö÷·ÖÀàºÅ£ºG06F21/31(2013.01)I	ÓÐÐ§-ÊÚÈ¨	400052 ÖØÇìÊÐ¾ÅÁúÆÂÇø¾ÅÁú¿Æ¼¼Ô°»ªÁú´óµÀ1ºÅ	±¾·¢Ã÷¹«¿ªÁËÒ»ÖÖ»ùÓÚÍ¼Ïñ¼ÓÃÜµÄATM°²È«ÈÏÖ¤·½·¨£¬ÊôÓÚÐÅÏ¢¼ÓÃÜÁìÓò£¬Í¨¹ýÒøÐÐÁªÍøÏµÍ³£¬½¨Á¢ÖÐÑë¿ØÖÆ·þÎñÆ÷ÓëÐÅÏ¢´æ´¢·þÎñÆ÷µÄÁ¬½Ó¡¢½¨Á¢ÒøÐÐ¿¨ÓëÒøÐÐ×ÔÖúÖÕ¶ËµÄÁ¬½Ó£¬ÒøÐÐ×ÔÖúÖÕ¶Ë¶ÁÈ¡ÒøÐÐ¿¨ºó£¬Í¨¹ýÒøÐÐÁªÍøÏµÍ³½«ÒøÐÐ¿¨µÄÈÏÖ¤ÐÅÏ¢£¬Á¬Í¬·þÎñÇëÇóÒ»²¢·¢ËÍÖÁÖÐÑë¿ØÖÆ·þÎñÆ÷£»ÖÐÑë¿ØÖÆ·þÎñÆ÷½«½ÓÊÕµÄÈÏÖ¤ÐÅÏ¢£¬ÓëÐÅÏ¢´æ´¢·þÎñÆ÷µÄÐÅÏ¢Êý¾Ý¿âÖÐÏàÓ¦ÈÏÖ¤ÐÅÏ¢½øÐÐÈÏÖ¤²¢·´À¡ATMÖÕ¶Ë£»±¾·¢Ã÷ÄÜ¹»¸ù¾ÝÃÜÂëÖ±½Ó½øÐÐÍ¼Ïñ½âÃÜ£¬Óë´«Í³µÄÍ…	°²È«
ÖÕ¶ËµÄ¿ª¹Ø»ú¿ØÖÆ·½·¨¡¢¿ª¹Ø»ú¿ØÖÆ×°ÖÃºÍÖÕ¶Ë	ÓîÁú¼ÆËã»úÍ¨ÐÅ¿Æ¼¼£¨ÉîÛÚ£©ÓÐÏÞ¹«Ë¾	2016-02-19	2016-07-20	CN105787325A	Ö÷·ÖÀàºÅ£ºG06F21/32(2013.01)I	ÔÚÉó-ÊµÖÊÉó²éµÄÉúÐ§	518040 ¹ã¶«Ê¡ÉîÛÚÊÐ³µ¹«ÃíÌì°²ÊýÂë³Ç´´ÐÂ¿Æ¼¼¹ã³¡B×ù8Â¥	±¾·¢Ã÷Ìá³öÁËÒ»ÖÖÖÕ¶ËµÄ¿ª¹Ø»ú¿ØÖÆ·½·¨¡¢ÖÕ¶ËµÄ¿ª¹Ø»ú¿ØÖÆ×°ÖÃºÍÖÕ¶Ë£¬ÆäÖÐ£¬ËùÊöÖÕ¶ËµÄ¿ª¹Ø»ú¿ØÖÆ·½·¨°üÀ¨£ºÔÚ½ÓÊÕµ½¿ª¹Ø»úÐÅºÅÊ±£¬²É¼¯ÓÃ»§µÄÉúÎïÌØÕ÷ÐÅÏ¢£»¶ÔËùÊöÉúÎïÌØÕ÷ÐÅÏ¢½øÐÐÅÐ¶Ï£¬²¢¸ù¾ÝÅÐ¶Ï½á¹ûÈ·¶¨ÊÇ·ñÏòÖÕ¶ËµÄÏµÍ³·¢ËÍ¿ª»úÖ¸Áî»òÕß¹Ø»úÖ¸Áî¡£Í¨¹ý±¾·¢Ã÷µÄ¼¼Êõ·½°¸£¬¿ÉÒÔÓÐÐ§µØÈ·±£ÖÕ¶Ë°²È«¿ª¹Ø»ú£¬´Ó¶øÌá¸ßÁËÖÕ¶ËµÄ°²È«ÐÔºÍ·ÀµÁÐÔÄÜ£¬½ø¶øÌáÉýÁËÓÃ»§ÌåÑé¡£	°²È«
ÖÇÄÜ´©´÷Éè±¸µÄ¿ØÖÆ·½·¨¡¢×°ÖÃ¼°ÖÇÄÜ´©´÷Éè±¸	¹¨´óÐã	2016-03-07	2017-09-15	CN107169332A	Ö÷·ÖÀàºÅ£ºG06F21/32(2013.01)I	ÔÚÉó-¹«¿ª	518049 ¹ã¶«Ê¡ÉîÛÚÊÐÃ·ÁÖÂ·Ã·ÁÖÒ»´å22¶°203	±¾·¢Ã÷Éæ¼°ÖÇÄÜ´©´÷Éè±¸µÄ¿ØÖÆ·½·¨¡¢×°ÖÃ¼°ÖÇÄÜ´©´÷Éè±¸£¬ÆäÖÐ¿ØÖÆ·½·¨°üÀ¨²½Öè£º²É¼¯ÖÇÄÜ´©´÷Éè±¸µ±Ç°´©´÷ÕßµÄÉúÎïÌØÕ÷ÐÅÏ¢£»´ÓÊý¾Ý¿âÆ¥Åä²É¼¯µÄÉúÎïÌØÕ÷ÐÅÏ¢£¬Êý¾Ý¿â±£´æÓÐÖÇÄÜ´©´÷Éè±¸µÄºÏ·¨ÓÃ»§µÄÉúÎïÌØÕ÷ÐÅÏ¢£»ÅÐ¶ÏÊÇ·ñ´ÓÊý¾Ý¿âÆ¥Åäµ½ÖÇÄÜ´©´÷Éè±¸ºÏ·¨ÓÃ»§µÄÉúÎïÌØÕ÷ÐÅÏ¢£»Èô´ÓÊý¾Ý¿âÆ¥Åäµ½ÖÇÄÜ´©´÷Éè±¸ºÏ·¨ÓÃ»§µÄÉúÎïÌØÕ÷ÐÅÏ¢£¬ÔòÏò¶¯Á¦»ú¹¹·¢ËÍ½âËø¿ØÖÆÖ¸Áî£¬ÒÔÊ¹¶¯Á¦»ú¹¹Ö´ÐÐ½âËø¿ØÖÆÖ¸Áî½â¿ªÖÇÄÜ´©´÷Éè±¸µÄËø¿Û£»»ñÈ¡ÖÇÄ…	°²È«
Ò»ÖÖÉí·ÝÈÏÖ¤·½·¨¼°ÏµÍ³	ÀîÃ÷	2016-03-07	2016-09-14	CN105938526A	Ö÷·ÖÀàºÅ£ºG06F21/31(2013.01)I	ÔÚÉó-ÊµÖÊÉó²éµÄÉúÐ§	100086 ±±¾©ÊÐº£µíÇøÌ«ÔÂÔ°12ºÅÂ¥603ÊÒ	±¾·¢Ã÷Ìá¹©ÁËÒ»ÖÖÉí·ÝÈÏÖ¤·½·¨¼°ÏµÍ³¡£¸Ã·½·¨°üÀ¨£ºµÚÒ»Éè±¸ÓëµÚ¶þÉè±¸½¨Á¢Í¨ÐÅÁ¬½Ó£»µÚÒ»Éè±¸Í¨¹ýÍ¨ÐÅÁ¬½Ó½ÓÊÕµÚ¶þÉè±¸´«ÊäµÄ´ýÈÏÖ¤Êý¾Ý£»µÚÒ»Éè±¸²É¼¯ÉúÎïÌØÕ÷ÐÅÏ¢£»µÚÒ»Éè±¸½«´ýÈÏÖ¤Êý¾ÝºÍÉúÎïÌØÕ÷ÐÅÏ¢·¢ËÍ¸øºóÌ¨·þÎñÆ÷£»ºóÌ¨·þÎñÆ÷½ÓÊÕ´ýÈÏÖ¤Êý¾ÝºÍÉúÎïÌØÕ÷ÐÅÏ¢£»ºóÌ¨·þÎñÆ÷»ñÈ¡Ô¤ÏÈ´æ´¢µÄÓëÉí·Ý±êÊ¶¶ÔÓ¦µÄÈÏÖ¤Òò×ÓºÍÉúÎïÌØÕ÷ÑéÖ¤ÐÅÏ¢£»ºóÌ¨·þÎñÆ÷¸ù¾ÝÈÏÖ¤Òò×Ó¶ÔÊý×ÖÈÏÖ¤ÐÅÏ¢½øÐÐÈÏÖ¤£¬ÅÐ¶ÏÉúÎïÌØÕ÷ÐÅÏ¢ÓëÉúÎïÌØÕ÷ÑéÖ¤ÐÅÏ¢µÄÆ…	°²È«
Ò»ÖÖ»ùÓÚÕÆ¾²ÂöÊ¶±ðÈÏÖ¤µÄÒøÁª½»Ò×ÏµÍ³¼°×°ÖÃ	ÎâºÀ	2016-03-24	2016-06-15	CN105678534A	Ö÷·ÖÀàºÅ£ºG06Q20/18(2012.01)I	ÔÚÉó-ÊµÖÊÉó²éµÄÉúÐ§	201100 ÉÏº£ÊÐãÉÐÐÇø¸»¹úÂ·355Åª6ºÅÂ¥501ÊÒ	±¾·¢Ã÷Éæ¼°»ùÓÚÕÆ¾²ÂöÊ¶±ðÈÏÖ¤µÄÒøÁª½»Ò×ÏµÍ³¼°×°ÖÃ£¬°üÀ¨¿ª»§ÐÐÐÅÏ¢¶Ë¡¢ÒøÁª½áËãÆ½Ì¨ºÍÖÕ¶ËÉè±¸£¬¿ª»§ÐÐÐÅÏ¢¶ËÓÃÓÚÂ¼ÈëÓÃ»§ÐÅÏ¢²¢´æ´¢ÓÚÊý¾Ý¿âÖÐ£¬ÓÃ»§ÐÅÏ¢°üÀ¨ÕÆ¾²ÂöÍ¼ÏñÐÅÏ¢¡¢ÕË»§ºÅºÍÊÖ»úºÅ£¬ÕÆ¾²ÂöÍ¼ÏñÐÅÏ¢ºÍÕË»§ºÅ¹²ÏíÓÚÒøÁª½áËãÆ½Ì¨µÄ½»Ò×Êý¾Ý¿â£»½ÓÊÕÒøÁª½áËãÆ½Ì¨·¢ËÍµÄ½»Ò×ÓÃ»§ÐÅÏ¢£»½«½ÓÊÕµ½µÄÐÅÏ¢ÔÚÊý¾Ý¿âÖÐ½øÐÐÈÏÖ¤£»µ±½»Ò×½ð¶îÐ¡ÓÚµÈÓÚÕË»§Óà¶î»òÕßÕË»§¿ÉÓÃ¶î¶ÈÊ±£¬ÏòÓÃ»§ÊÖ»ú·¢ËÍÑéÖ¤ÂëÐÅÏ¢£»ÅÐ¶ÏÑéÖ¤ÂëÐÅÏ¢µÄ×¼È·Ð…	°²È«
²»¼ÇÃû¿¨·À¶ªÊ§·½·¨¼°ÏµÍ³	ÉÏº£ÖÇÏòÐÅÏ¢¿Æ¼¼ÓÐÏÞ¹«Ë¾	2016-03-25	2016-06-29	CN105718819A	Ö÷·ÖÀàºÅ£ºG06F21/62(2013.01)I	ÓÐÐ§-ÊÚÈ¨	201306 ÉÏº£ÊÐÆÖ¶«ÐÂÇø×ÔÓÉÃ³Ò×ÊÔÑéÇø½ð¿ÆÂ·2966ºÅ1´±207ÊÒ	Ò»ÖÖ²»¼ÇÃû¿¨·À¶ªÊ§·½·¨°üÀ¨£ºa)²»¼ÇÃû¿¨ÒÆ¶¯Éè±¸ÔÚµÈ´ýË¢¿¨ÆÚ¼ä·¢ËÍÐÄÌøÇëÇóÖÁÒÆ¶¯ÖÕ¶Ë£»b)µ±ÅÐ¶¨Î´ÊÕµ½ÒÆ¶¯ÖÕ¶ËµÄÐÄÌøÏìÓ¦µÄ´ÎÊý³¬¹ýµÚÒ»ãÐÖµÊ±£¬²»¼ÇÃû¿¨ÒÆ¶¯Éè±¸ÉèÖÃÎª¶ªÊ§/Òì³£Ä£Ê½£»c)²»¼ÇÃû¿¨ÒÆ¶¯Éè±¸·¢ËÍ¿ØÖÆÐÅºÅÖÁ¹©µçÄ£¿éÒÔÍ£Ö¹¸ø°²È«Ä£¿é¹©µç£»d)°²È«Ä£¿é½øÈëÍ£Ö¹×´Ì¬£»e)²»¼ÇÃû¿¨ÒÆ¶¯Éè±¸ÅÐ¶ÏÊÇ·ñÊÕµ½Ö§¸¶ÇëÇó£¬ÈôÊÕµ½Ôò¼ÇÂ¼Ë¢¿¨ÐÅÏ¢£¬²¢Î´ÏìÓ¦Ö§¸¶ÇëÇó£»f)²»¼ÇÃû¿¨ÒÆ¶¯Éè±¸ÅÐ¶ÏÊÇ·ñÊÕµ½»Ö¸´°ó¶¨ÇëÇó£¬ÈôÊÕµ½Ôò²»¼ÇÃû…	°²È«
±£ÏÕÐÅÏ¢´¦Àí·½·¨¡¢×°ÖÃºÍÏµÍ³	Æ½°²¿Æ¼¼£¨ÉîÛÚ£©ÓÐÏÞ¹«Ë¾	2016-03-28	2017-10-10	CN107240022A	Ö÷·ÖÀàºÅ£ºG06Q40/08(2012.01)I	ÔÚÉó-ÊµÖÊÉó²éµÄÉúÐ§	518052 ¹ã¶«Ê¡ÉîÛÚÊÐ¸£ÌïÇø°ËØÔÁë°ËØÔÈýÂ·Æ½°²´óÏÃÁùÂ¥	±¾·¢Ã÷Éæ¼°Ò»ÖÖ±£ÏÕÐÅÏ¢´¦Àí·½·¨£¬ËùÊö·½·¨°üÀ¨ÒÔÏÂ²½Öè£ºÒµÎñÔ±ÖÕ¶Ë»ñÈ¡ÓÃ»§ÐÅÏ¢£»»ñÈ¡´ý°ìÀíÏÕÖÖµÄÐ­ÒéÄ£°åÎÄ¼þ£¬ËùÊöÐ­ÒéÄ£°åÎÄ¼þ°üÀ¨Ç°ÆÚÐ­ÒéÄ£°åÎÄ¼þ£»¸ù¾ÝËùÊöÓÃ»§ÐÅÏ¢ÓëËùÊöÇ°ÆÚÐ­ÒéÄ£°åÎÄ¼þÉú³ÉÓëÓÃ»§ÐÅÏ¢¶ÔÓ¦µÄµÚÒ»¸ñÊ½µÄµÚÒ»±£ÏÕÐ­ÒéÎÄ¼þ£¬ËùÊöµÚÒ»±£ÏÕÐ­ÒéÎÄ¼þÖÐ°üº¬¶ÔÓ¦µÄÓÃÓÚÎ¨Ò»±êÊ¶ËùÊöµÚÒ»±£ÏÕÐ­ÒéÎÄ¼þµÄµÚÒ»±êÊ¶Âë£»½«Ã¿¸öµÚÒ»¸ñÊ½µÄµÚÒ»±£ÏÕÐ­ÒéÎÄ¼þ×ª»¯Îª¶ÔÓ¦µÄµÚ¶þ¸ñÊ½µÄµÚÒ»±£ÏÕÐ­ÒéÎÄ¼þ£»½«ËùÊöµÚ¶þ¸ñÊ½µÄµ…	±£ÏÕ
Ò»ÖÖÒÆ¶¯Éè±¸Ó¦ÓÃÈ¨ÏÞ¹ÜÀí·½·¨¼°ÏµÍ³	ÀÖÊÓ¿Ø¹É£¨±±¾©£©ÓÐÏÞ¹«Ë¾	2016-03-29	2016-08-24	CN105893817A	Ö÷·ÖÀàºÅ£ºG06F21/32(2013.01)I	ÔÚÉó-ÊµÖÊÉó²éµÄÉúÐ§	100025 ±±¾©ÊÐ³¯ÑôÇøÒ¦¼ÒÔ°Â·105ºÅ3ºÅÂ¥10²ã1102	±¾·¢Ã÷¹«¿ªÒ»ÖÖÒÆ¶¯Éè±¸Ó¦ÓÃÈ¨ÏÞ¹ÜÀí·½·¨¼°ÏµÍ³£¬·½·¨°üÀ¨£º»ñÈ¡ÓÃÓÚ½øÐÐÈ¨ÏÞ¼ì²âµÄÈËÁ³Í¼Ïñ×÷ÎªÈ¨ÏÞÈËÁ³Í¼Ïñ£¬´ÓÈ¨ÏÞÈËÁ³Í¼ÏñÌáÈ¡¹ØÓÚÈ¨ÏÞÈËÁ³Í¼ÏñµÄÈ¨ÏÞÈËÁ³ÌØÕ÷£»ÏìÓ¦ÓÚ¶ÔÒÆ¶¯Éè±¸µÄÓ¦ÓÃÖ´ÐÐ¾ßÓÐÈ¨ÏÞÏÞÖÆµÄ²Ù×÷µÄÇëÇó£¬¿ªÆôÒÆ¶¯Éè±¸µÄÇ°ÖÃÉãÏñ×°ÖÃ£¬´ÓÇ°ÖÃÉãÏñ×°ÖÃ»ñÈ¡ÈËÁ³Í¼Ïñ×÷Îª´ý¼ì²âÈËÁ³Í¼Ïñ£»´Ó´ý¼ì²âÈËÁ³ÌáÈ¡¹ØÓÚ´ý¼ì²âÈËÁ³µÄ´ý¼ì²âÈËÁ³ÌØÕ÷£¬Èç¹û´ý¼ì²âÈËÁ³ÌØÕ÷ÓëÈ¨ÏÞÈËÁ³ÌØÕ÷Æ¥Åä£¬ÔòÔÊÐí¾ßÓÐÈ¨ÏÞÏÞÖÆµÄ²Ù×÷£¬·ñÔò¾Ü¾…	°²È«
µç×ÓÉè±¸¼°Æä¿ØÖÆ·½·¨	ÁªÏë£¨±±¾©£©ÓÐÏÞ¹«Ë¾	2016-03-29	2016-08-24	CN105893869A	Ö÷·ÖÀàºÅ£ºG06F21/62(2013.01)I	ÔÚÉó-ÊµÖÊÉó²éµÄÉúÐ§	100085 ±±¾©ÊÐº£µíÇøÉÏµØÎ÷Â·6ºÅ	±¾·¢Ã÷Ìá¹©Ò»ÖÖµç×ÓÉè±¸¼°Æä¿ØÖÆ·½·¨£¬Í¨¹ý¶Ôµç×ÓÉè±¸ÉèÖÃÊý¾Ý´¦Àí²ßÂÔ£¬ÄÜ¹»Ôö¼Óµç×ÓÉè±¸ÖÐµÄµç×ÓÇ®°üÊý¾ÝµÄ°²È«ÐÔ¡£µç×ÓÉè±¸£¬°üÀ¨£º´æ´¢µ¥Ôª£¬´æ´¢ËùÊöµç×ÓÉè±¸µÄµç×ÓÇ®°üÊý¾ÝÒÔ¼°ËùÊöµç×ÓÇ®°üÊý¾ÝµÄÊý¾Ý´¦Àí²ßÂÔ£»ÒÔ¼°´¦Àíµ¥Ôª£¬¼à²âÔÚËùÊöµç×ÓÉè±¸ÖÐÊÇ·ñ·¢ÉúÌØ¶¨ÊÂ¼þ£¬µ±¼à²âµ½ËùÊöÌØ¶¨ÊÂ¼þ·¢ÉúÊ±£¬»ñÈ¡ËùÊöÊý¾Ý´¦Àí²ßÂÔ£¬¸ù¾ÝËùÊöÊý¾Ý´¦Àí²ßÂÔ¶ÔËùÊöµç×ÓÇ®°üÊý¾ÝÖ´ÐÐÊý¾Ý±£»¤´¦Àí¡£	°²È«
ÔÚÏßÖ§¸¶·½·¨¼°×°ÖÃ	±±¾©Ð¡Ã×ÒÆ¶¯Èí¼þÓÐÏÞ¹«Ë¾	2016-03-29	2016-07-27	CN105809440A	Ö÷·ÖÀàºÅ£ºG06Q20/32(2012.01)I	ÔÚÉó-ÊµÖÊÉó²éµÄÉúÐ§	100085 ±±¾©ÊÐº£µíÇøÇåºÓÖÐ½Ö68ºÅ»ªÈóÎå²Ê³Ç¹ºÎïÖÐÐÄ¶þÆÚ9²ã01·¿¼ä	±¾¹«¿ªÌá¹©ÁËÒ»ÖÖÔÚÏßÖ§¸¶·½·¨¼°×°ÖÃ£¬ÊôÓÚÍøÂç¼¼ÊõÁìÓò¡£·½·¨°üÀ¨£ºÉèÖÃ¾ß±¸°²È«Ö§¸¶»·¾³µÄµÚ¶þÏµÍ³ÕË»§£¬ËùÊöµÚ¶þÏµÍ³ÕË»§ÖÐ°²×°¼°ÔËÐÐµÄÓ¦ÓÃ¾ùÎª¾­°²È«ÑéÖ¤Í¨¹ýµÄÓ¦ÓÃ£»½øÈëËùÊöµÚ¶þÏµÍ³ÕË»§£¬²¢ÔÚËùÊöµÚ¶þÏµÍ³ÕË»§ÏÂ½øÐÐÖ§¸¶²Ù×÷¡£±¾¹«¿ªÍ¨¹ýÔÚµ±Ç°ÖÕ¶ËÉÏÊµÏÖÔÚÏßÖ§¸¶Ê±£¬±ØÐëÊÇÔÚ¸ÃµÚ¶þÏµÍ³ÕË»§¹ÜÀíµÄÏµÍ³ÏÂ½øÐÐ£¬ÓÉÓÚ¸ÃµÚ¶þÏµÍ³ÕË»§°²×°¼°ÔËÐÐµÄÓ¦ÓÃ¾ùÎª¾­°²È«ÑéÖ¤Í¨¹ýµÄÓ¦ÓÃ£¬Òò´ËÔÚ½øÐÐÔÚÏßÖ§¸¶Ê±£¬ÄÜ¹»±ÜÃâÆäËûÓ¦ÓÃÇÔÈ¡Ó…	°²È«
Ö§¸¶·½·¨¼°×°ÖÃ	±±¾©Ð¡Ã×ÒÆ¶¯Èí¼þÓÐÏÞ¹«Ë¾	2016-03-31	2016-08-10	CN105844470A	Ö÷·ÖÀàºÅ£ºG06Q20/38(2012.01)I	ÔÚÉó-ÊµÖÊÉó²éµÄÉúÐ§	100085 ±±¾©ÊÐº£µíÇøÇåºÓÖÐ½Ö68ºÅ»ªÈóÎå²Ê³Ç¹ºÎïÖÐÐÄ¶þÆÚ9²ã01·¿¼ä	±¾¹«¿ª¹ØÓÚÒ»ÖÖÖ§¸¶·½·¨¼°×°ÖÃ£¬ÊôÓÚ¼ÆËã»ú¼¼ÊõÁìÓò¡£ËùÊö·½·¨°üÀ¨£ºµ±Ö§¸¶Ó¦ÓÃÔÚÇ°Ì¨ÔËÐÐÊ±£¬½ûÖ¹ÔÚËùÊöÖ§¸¶Ó¦ÓÃËùÏÔÊ¾µÄ½çÃæÉÏÏÔÊ¾Ðü¸¡´°£»½ÓÊÕÓÃ»§ÔÚËùÊö½çÃæÉÏ´¥·¢µÄÖ§¸¶²Ù×÷£»¸ù¾ÝËùÊöÖ§¸¶²Ù×÷½øÐÐÖ§¸¶£¬Ê¹µÃÔÚÖ§¸¶Ó¦ÓÃÔÚÇ°Ì¨ÔËÐÐÊ±£¬ÖÕ¶Ë½ûÖ¹ÏÔÊ¾ÕÚ¸ÇÀà²¡¶¾Éú³ÉµÄÓëÖ§¸¶Ó¦ÓÃËùÏÔÊ¾µÄ½çÃæÏàÍ¬µÄ¼Ù½çÃæ£¬´ËÊ±£¬ÓÉÓÚÓÃ»§ÔÚÖ§¸¶Ó¦ÓÃËùÏÔÊ¾µÄÕæÊµµÄ½çÃæÖÐÊäÈëÖ§¸¶ÐÅÏ¢£¬Òò´Ë£¬ÕÚ¸ÇÀà²¡¶¾ÎÞ·¨Í¨¹ý¼Ù½çÃæ»ñÈ¡µ½ÓÃ»§ÊäÈëµÄÖ§¸¶ÐÅÏ¢£…	Ö§¸¶
ÖÇÄÜ¾²Âö´©´÷Ê½ÊÖ»·	Îéº£Æ½	2016-04-02	2016-08-17	CN105867545A	Ö÷·ÖÀàºÅ£ºG06F1/16(2006.01)I	ÔÚÉó-¹«¿ª	528400 ¹ã¶«Ê¡ÖÐÉ½ÊÐÈýÏçÕòÇ°Â¤ÉçÇøºã°²½ÖÊ®ÈýÏï23ºÅ	±¾·¢Ã÷¹«¿ªÁËÖÇÄÜ¾²Âö´©´÷Ê½ÊÖ»·£¬°üÀ¨ÊÖ»·±¾Ìå£¬¸ÃÊÖ»·±¾ÌåÄÚÉèÖÃÓÐÓÃÓÚ²É¼¯ÈËÌå²¿Î»Æ¤ÏÂ¾²ÂöÍ¼ÏñµÄºìÍâÉãÏñÍ·¡¢Ö¸ÎÆÊ¶±ðÄ£¿é¡¢ÈÏÖ¤¿ØÖÆÆ÷ºÍÓëÈÏÖ¤¿ØÖÆÆ÷Í¨¹ý×ÜÏßÁ¬½ÓµÄÖ§¸¶µ¥Ôª£¬ÒÔ¼°ÓëÈÏÖ¤¿ØÖÆÆ÷Á¬½ÓµÄ¾²Âö²ÎÊýÉèÖÃµ¥ÔªºÍÓïÒôÊ¶±ðÄ£¿é£¬¸Ã¾²Âö²ÎÊýÉèÖÃµ¥ÔªÓÃÓÚÔ¤´æ»úÖ÷µÄ¾²ÂöÍ¼ÏñÊý¾Ý£¬ÈÏÖ¤¿ØÖÆÆ÷ÓÃÓÚ±È¶ÔºìÍâÉãÏñÍ·²É¼¯µÄ¾²ÂöÍ¼ÏñÊý¾ÝÓë¾²Âö²ÎÊýÉèÖÃµ¥ÔªÖÐÔ¤´æµÄÊý¾ÝÊÇ·ñÒ»ÖÂÒÔ¿ØÖÆÖ§¸¶µ¥ÔªµÄÆô¶¯¡£±¾·¢Ã÷Í¨¹ýºìÍâÉãÏñÍ·²É¼¯Ê…	Ö§¸¶
Ò»ÖÖ»ùÓÚÖÚ³ïµÄÒôÀÖ°æÈ¨ÊÚÈ¨¹ÜÀíÆ½Ì¨¼°ÆäÓ¦ÓÃ	Ìì½ò·ÉÔ¾ÎÞÏÞ¿Æ¼¼ÓÐÏÞ¹«Ë¾	2016-04-06	2016-08-10	CN105844117A	Ö÷·ÖÀàºÅ£ºG06F21/10(2013.01)I	ÔÚÉó-ÊµÖÊÉó²éµÄÉúÐ§	300000 Ìì½òÊÐ½òÄÏÇø±±Õ¢¿ÚÕò¹ú¼Ò×ÔÖ÷´´ÐÂÊ¾·¶Çø¸ßÓªÂ·8ºÅAÇø506-4	±¾·¢Ã÷Ìá¹©ÁËÒ»ÖÖ»ùÓÚÖÚ³ïµÄÒôÀÖ°æÈ¨ÊÚÈ¨¹ÜÀíÆ½Ì¨¼°ÆäÓ¦ÓÃ£¬»ùÓÚÖÚ³ïµÄÒôÀÖ°æÈ¨ÊÚÈ¨¹ÜÀíÆ½Ì¨°üÀ¨£º×¢²áµÇÂ½Ä£¿é£¬ÓÃÓÚÊ¶±ðÓÃ»§Éí·Ý×ÊÁÏ²¢°ä·¢¡¢¼¤»îÓÃ»§ÕËºÅ£»´ÊÇú×÷ÕßÑ¡ÔñÄ£¿é£¬ÓÃÓÚÑ¡Ôñ´ÊÇú×÷Õß¼°Æä×÷Æ·£»½»Ò×Ä£Ê½Ñ¡ÔñÄ£¿é£¬ÓÃÓÚÑ¡Ôñ½»Ò×Ä£Ê½£»½»Ò×Ö§¸¶Ä£¿é£¬ÓÃÓÚÓÃ»§ÔÚ¹ÜÀíÆ½Ì¨ÉÏ½øÐÐÖ§¸¶£»ÊÚÈ¨Ä£¿é£¬ÓÃÓÚ¶Ô½»Ò×³É¹¦µÄÓÃ»§·¢ËÍÊÚÈ¨Ö¤Ã÷£»×Ê½ð·ÖÅäÄ£¿é£¬ÓÃÓÚ½»Ò×³É¹¦ºó¹ÜÀíÆ½Ì¨Óë´ÊÇú×÷Õß½øÐÐ×Ê½ð·ÖÅä£»×Ê½ð·µ»¹Ä£¿é£¬ÓÃÓÚ·µ»¹Ö…	½è´û
±£È«ÐÅÏ¢´¦ÀíÖÐÓÃ»§Éí·ÝÈ·ÈÏ·½·¨ºÍ×°ÖÃ	Æ½°²¿Æ¼¼£¨ÉîÛÚ£©ÓÐÏÞ¹«Ë¾	2016-04-13	2017-10-24	CN107292150A	Ö÷·ÖÀàºÅ£ºG06F21/32(2013.01)I	ÔÚÉó-ÊµÖÊÉó²éµÄÉúÐ§	518052 ¹ã¶«Ê¡ÉîÛÚÊÐ¸£ÌïÇø°ËØÔÁë°ËØÔÈýÂ·Æ½°²´óÏÃÁùÂ¥	±¾·¢Ã÷Éæ¼°Ò»ÖÖ±£È«ÐÅÏ¢´¦ÀíÖÐÓÃ»§Éí·ÝÈ·ÈÏ·½·¨£¬ËùÊö·½·¨°üÀ¨ÒÔÏÂ²½Öè£º·þÎñÆ÷½ÓÊÕÖÕ¶Ë·¢ËÍµÄ±£È«ÇëÇó£¬ËùÊö±£È«ÇëÇóÐ¯´øÓÃ»§±êÊ¶£»¸ù¾ÝËùÊö±£È«ÇëÇó»ñÈ¡¶ÔÓ¦µÄ·çÏÕÖµ£»¼ì²âËùÊö·çÏÕÖµÊÇ·ñ´ïµ½Ô¤Éè·çÏÕÖµ£¬ÈôÊÇ£¬ÔòÏòËùÊöÖÕ¶Ë·¢ËÍÉí·ÝÈ·ÈÏÖ¸Áî£¬Ê¹ËùÊöÖÕ¶Ë¸ù¾ÝËùÊöÉí·ÝÈ·ÈÏÖ¸Áîµ÷ÓÃÉãÏñÍ·ÅÄÉãÍ¼Ïñ£¬½«ËùÊöÍ¼Ïñ·¢ËÍÖÁ·þÎñÆ÷£»ËùÊö·þÎñÆ÷½ÓÊÕËùÊöÖÕ¶Ë·¢ËÍµÄÅÄÉãÍ¼Ïñ£»¸ù¾ÝËùÊöÓÃ»§±êÊ¶´Ó¹«°²ÏµÍ³µÄÐÅÏ¢Êý¾Ý¿âÖÐ»ñÈ¡¶ÔÓ¦ÓÃ»§µÄÉí·ÝÖ…	°²È«
Ò»ÖÖPOSÖÕ¶ËÍ¨ÐÅ·½·¨ºÍÏµÍ³	ÉîÛÚÊÐÐÂ¹ú¶¼Ö§¸¶¼¼ÊõÓÐÏÞ¹«Ë¾	2016-04-22	2016-07-13	CN105761069A	Ö÷·ÖÀàºÅ£ºG06Q20/20(2012.01)I	ÔÚÉó-ÊµÖÊÉó²éµÄÉúÐ§	518040 ¹ã¶«Ê¡ÉîÛÚÊÐ¸£ÌïÇøÉ³Í·½ÖµÀÌ©È»¾¢ËÉ´óÏÃ17B	±¾·¢Ã÷¹«¿ªÁËÒ»ÖÖPOSÖÕ¶ËÍ¨ÐÅ·½·¨£¬°üÀ¨ÒÔÏÂ²½Öè£ºS1¡¢POSÖÕ¶ËÍ¨¹ýÖÁÉÙÁ½ÖÖÍ¨ÐÅ·½Ê½ÏòºóÌ¨·þÎñÆ÷·¢ËÍ½»Ò×ÐÅÏ¢£»»¹¹«¿ªÁËÒ»ÖÖPOSÖÕ¶ËÍ¨ÐÅÏµÍ³£¬°üÀ¨£ºPOSÖÕ¶Ë£¬ÓÃÓÚÍ¨¹ýÖÁÉÙÁ½ÖÖÍ¨ÐÅ·½Ê½ÏòºóÌ¨·þÎñÆ÷·¢ËÍ½»Ò×ÐÅÏ¢£»ºóÌ¨·þÎñÆ÷£¬ÓÃÓÚ´¦Àí×îÏÈËÍ´ïµÄ½»Ò×ÐÅÏ¢¡£±¾·¢Ã÷ÖÐÒ»ÖÖPOSÖÕ¶ËÍ¨ÐÅ·½·¨Ìá¸ßÁËPOSÖÕ¶ËµÄ½»Ò×ÐÅÏ¢Í¨ÐÅ³É¹¦ÂÊ£¬Ìá¸ßÓÃ»§ÌåÑé£»±¾·¢Ã÷ÖÐÒ»ÖÖPOSÖÕ¶ËÍ¨ÐÅÏµÍ³½áºÏPOSÖÕ¶ËºÍºóÌ¨·þÎñÆ÷½â¾öÁË´¦ÀíËÙ¶ÈÂýµÄÎÊÌâ£¬½µµÍPOSÖÕ¶Ë…	Ö§¸¶
ÊÓÆµÐÅÏ¢Ö§¸¶·½·¨¼°×°ÖÃ	ÀÖÊÓ¿Ø¹É£¨±±¾©£©ÓÐÏÞ¹«Ë¾	2016-04-29	2016-09-21	CN105955478A	Ö÷·ÖÀàºÅ£ºG06F3/01(2006.01)I	ÔÚÉó-ÊµÖÊÉó²éµÄÉúÐ§	100025 ±±¾©ÊÐ³¯ÑôÇøÒ¦¼ÒÔ°Â·105ºÅ3ºÅÂ¥10²ã1102	±¾·¢Ã÷ÊµÊ©ÀýÌá¹©Ò»ÖÖÊÓÆµÐÅÏ¢Ö§¸¶·½·¨¼°×°ÖÃ£¬Éæ¼°ÐÅÏ¢¼¼ÊõÁìÓò£¬Ö÷ÒªÄ¿µÄÊÇ½â¾öÏÖÓÐ¼¼ÊõÖÐÊÓÆµÐÅÏ¢Ö§¸¶Ð§ÂÊ½ÏµÍµÄÈ±ÏÝ¡£ËùÊö·½·¨°üÀ¨£º»ñÈ¡ÐéÄâÏÖÊµÉè±¸¶ÔÓ¦µÄ¹â±êÔÚÊÓÆµÐÅÏ¢Ö§¸¶½çÃæÉÏÁ¬Ðø»¬¶¯Éú³ÉµÄÍ¼°¸ÐÅÏ¢£»¼ì²âËùÊöÍ¼°¸ÐÅÏ¢ÊÇ·ñÎªÔ¤ÉèÍ¼°¸ÐÅÏ¢£»ÈôÊÇ£¬Ôò¸ù¾ÝËùÊöÍ¼°¸ÐÅÏ¢£¬»ñÈ¡ÊÓÆµÐÅÏ¢¶ÔÓ¦µÄÖ§¸¶ÃÜÂëÐÅÏ¢£»¸ù¾ÝËùÊöÖ§¸¶ÃÜÂëÐÅÏ¢£¬¶ÔËùÊöÊÓÆµÐÅÏ¢½øÐÐÖ§¸¶¡£±¾·¢Ã÷ÊÊÓÃÓÚ»ùÓÚÐéÄâÏÖÊµÉè±¸µÄÊÓÆµÐÅÏ¢Ö§¸¶¡£	Ö§¸¶
Í¼ÏñÒþË½ÐÅÏ¢´¦Àí·½·¨¼°×°ÖÃ	Ì©¿µÈËÊÙ±£ÏÕ¹É·ÝÓÐÏÞ¹«Ë¾	2016-05-04	2016-10-12	CN106022142A	Ö÷·ÖÀàºÅ£ºG06F21/60(2013.01)I	ÔÚÉó-ÖøÂ¼ÊÂÏî±ä¸ü	100031 ±±¾©ÊÐÎ÷³ÇÇø¸´ÐËÃÅÄÚ´ó½Ö156ºÅ	±¾·¢Ã÷Ìá¹©Ò»ÖÖÍ¼ÏñÒþË½ÐÅÏ¢´¦Àí·½·¨¼°×°ÖÃ¡£¸Ã·½·¨°üÀ¨£ºÏÂÔØ´ý´¦ÀíÍ¼ÏñºÍÔ¤´æµÄ¶à¸öÄ£°å²ÎÊý£¬¶Ô´ý´¦ÀíÍ¼Ïñ½øÐÐÔ¤´¦ÀíµÃµ½¶þÖµ»¯Í¼Ïñ£¬´Ó¶þÖµ»¯Í¼ÏñÖÐÌáÈ¡³öµÚÒ»¾ØÐÎÇøÓò¼¯ºÏ£¬¶ÔµÚÒ»¾ØÐÎÇøÓò¼¯ºÏ°´ÕÕÔ¤Éè¹æÔò½øÐÐÉ¸Ñ¡£¬µÃµ½µÚ¶þ¾ØÐÎÇøÓò¼¯ºÏ£¬¼ÆËãµÚ¶þ¾ØÐÎÇøÓò¼¯ºÏµÄÌØÕ÷Öµ£¬È·¶¨³öÓëµÚ¶þ¾ØÐÎÇøÓò¼¯ºÏµÄÌØÕ÷ÖµÖ®²î×îÐ¡µÄN¸öÄ£°å²ÎÊý£¬°´ÕÕÌØÕ÷ÖµÖ®²î´ÓÐ¡µ½´óµÄË³Ðò£¬ÒÀ´Î½«µÚ¶þ¾ØÐÎÇøÓò¼¯ºÏÓëN¸öÄ£°å²ÎÊýÖÐÃ¿Ò»Ä£°å²ÎÊýµÄÒþË½Ç…	±£ÏÕ
Ò»ÖÖ»ùÓÚ Linux µÄ×¢²á±í·þÎñÏµÍ³¡¢·½·¨¼°½ðÈÚ×ÔÖúÉè±¸	¹ãÖÝ¹ãµçÔËÍ¨½ðÈÚµç×Ó¹É·ÝÓÐÏÞ¹«Ë¾	2016-05-04	2016-08-31	CN105912952A	Ö÷·ÖÀàºÅ£ºG06F21/62(2013.01)I	ÔÚÉó-ÊµÖÊÉó²éµÄÉúÐ§	510663 ¹ã¶«Ê¡¹ãÖÝÊÐÂÜ¸ÚÇø¿ÆÑ§³Ç¿ÆÁÖÂ·9ºÅ	±¾·¢Ã÷¹«¿ªÁËÒ»ÖÖ»ùÓÚLinuxµÄ×¢²á±í·þÎñÏµÍ³£¬°üÀ¨£ºÄÚ´æ×¢²á±í¹¹½¨µ¥Ôª£¬ÓÃÓÚ¼ÓÔØ²Ù×÷ÏµÍ³ÏÂµÄ×¢²á±íÊý¾ÝÎÄ¼þ£¬²¢Í¨¹ýÊý¾Ý¿â½Ó¿Ú¶ÁÈ¡ËùÊö×¢²á±íÊý¾ÝÎÄ¼þÖÐÒÑ±£´æµÄÅäÖÃ±íÊý¾Ý£¬ÔÚÄÚ´æÖÐ¹¹½¨ÄÚ´æ×¢²á±í£»×¢²á±í²Ù×÷µ¥Ôª£¬ÓÃÓÚ´Ó×¢²á±í±à¼­Æ÷»òÕßÓÃ»§½ø³ÌÖÐÊÕ¼¯½ÚµãÊý¾Ý£¬²¢½«½ÚµãÊý¾Ý´«Êä¸ø×¢²á±í·þÎñµ¥Ôª£»×¢²á±í·þÎñµ¥Ôª£¬ÓÃÓÚ¸ù¾ÝÕë¶ÔÄÚ´æ×¢²á±íµÄ²Ù×÷·½Ê½£¬¶ÔÄÚ´æ×¢²á±íÖÐÓë½ÚµãÊý¾Ý¶ÔÓ¦µÄ½Úµã½øÐÐÏàÓ¦µÄ²Ù×÷¡£±¾·¢Ã÷»¹¹«¿ªÁË…	Êý¾Ý·ÖÎö
Ò»ÖÖ¸öÈËÐÅÏ¢°²È«´¦Àí×°ÖÃ	¶«·½Í¨ÐÅ¹É·ÝÓÐÏÞ¹«Ë¾	2016-05-05	2016-09-28	CN105975882A	Ö÷·ÖÀàºÅ£ºG06F21/85(2013.01)I	ÔÚÉó-ÊµÖÊÉó²éµÄÉúÐ§	310000 Õã½­Ê¡º¼ÖÝÊÐ±õ½­Çø¶«ÐÅ´óµÀ66ºÅ¶«ÐÅ³ÇÑÐ·¢Â¥A318	±¾·¢Ã÷¹«¿ªÁËÒ»ÖÖ¸öÈËÐÅÏ¢°²È«´¦Àí×°ÖÃ¡£Ëü°üÀ¨Ö÷´¦ÀíÆ÷¡¢Íâ½ÓÍ¨ÐÅ½Ó¿Ú¡¢ÏÔÊ¾ÆÁ¡¢ÒøÐÐ¿¨¶ÁÈ¡Ä£¿é¡¢¶þ´úÉí·ÝÖ¤¶ÁÈ¡Ä£¿éºÍ¼ÓÃÜ¼üÅÌÊäÈëµ¥Ôª£¬ËùÊöµÄÍâ½ÓÍ¨ÐÅ½Ó¿Ú¡¢ÏÔÊ¾ÆÁ¡¢ÒøÐÐ¿¨¶ÁÈ¡Ä£¿é¡¢¶þ´úÉí·ÝÖ¤¶ÁÈ¡Ä£¿éºÍ¼ÓÃÜ¼üÅÌÊäÈëµ¥Ôª¾ùÓëÖ÷´¦ÀíÆ÷Á¬½Ó¡£±¾·¢Ã÷µÄÓÐÒæÐ§¹ûÊÇ£º°ìÀí¸÷ÀàÒøÐÐ¸öÈËÒµÎñÊ±Âú×ãÊ¹ÓÃÉè±¸µÄ±ãÐ¯ÐÔ¡¢°²È«ÐÔ¡¢Áé»îÐÔºÍÍ³Ò»ÐÔ£»Í¨¹ý²»Í¬Íâ½ÓÍ¨ÐÅ½Ó¿ÚµÄÉè¼ÆÄÜ¹»Âú×ãÍê³É²»Í¬µÄÒµÎñÓ¦ÓÃÐèÇó£»½«¸÷¸ö¹¦ÄÜÄ£¿é½øÐÐºÏ²¢Éè¼…	°²È«
Ò»ÖÖ½ðÈÚÖÕ¶ËÈÏÖ¤·½·¨Óë×°ÖÃ	ºþÄÏ²ÆÕþ¾­¼ÃÑ§Ôº	2016-05-11	2016-10-12	CN106022037A	Ö÷·ÖÀàºÅ£ºG06F21/32(2013.01)I	ÓÐÐ§-ÊÚÈ¨	410205 ºþÄÏÊ¡³¤É³ÊÐ·ãÁÖ¶þÂ·139ºÅºþÄÏ²ÆÕþ¾­¼ÃÑ§Ôº	±¾·¢Ã÷Ìá¹©ÁËÒ»ÖÖ½ðÈÚÖÕ¶ËÈÏÖ¤·½·¨Óë×°ÖÃ£¬½áºÏÁËÒøÐÐ¿¨ºÅ¡¢ÉúÎïÌØÕ÷ºÍ´«Í³ÃÜÂë²úÉúÈÏÖ¤ÐÅÏ¢£¬¾ßÌåÎªÒÔÓÃ»§ÒøÐÐ¿¨ºÅ¡¢½áºÏÉúÎïÌØÕ÷ºÍ´«Í³ÃÜÂëÈý¸ö²ÎÊýÊ¹ÓÃµ¥ÏòÉ¢ÁÐº¯ÊýÍ¨¹ýÔËËã²úÉúÈÏÖ¤ÐÅÏ¢£¬ÔÚÒøÐÐÏµÍ³·þÎñÆ÷´æ´¢µÄÈÏÖ¤ÐÅÏ¢²»ÊÇÓÃ»§µÄÃÜÂëºÍÉúÎïÐÅÏ¢±¾Éí£¬Ò²²»ÊÇÕâÐ©ÐÅÏ¢¼ÓÃÜºóµÄÐÅÏ¢,²¢ÇÒÕâÈý¸ö²ÎÊýÈÎºÎÒ»¸ö²»Í¬½«²úÉúÍêÈ«²»Í¬µÄÈÏÖ¤ÐÅÏ¢£¬²úÉúµÄÈÏÖ¤ÐÅÏ¢²»¿ÉÎ±ÔìÒ²²»¿ÉÍ¨¹ýÃÜÂëÆÆ½âµÄ·½·¨»ñµÃ¡£±¾·¢Ã÷ÄÜ·ÀÖ¹ÈÏÖ¤ÐÅÏ¢µÁÓÃ¡¢±»ÆÆ…	°²È«
Ó¦ÓÃÓÚÖÇÄÜ¼Ò¾ÓÆ½Ì¨µÄÕËºÅ¹ÜÀí·½·¨ºÍ×°ÖÃ	°Ù¶ÈÔÚÏßÍøÂç¼¼Êõ£¨±±¾©£©ÓÐÏÞ¹«Ë¾	2016-05-11	2016-08-03	CN105825101A	Ö÷·ÖÀàºÅ£ºG06F21/31(2013.01)I	ÔÚÉó-ÊµÖÊÉó²éµÄÉúÐ§	100085 ±±¾©ÊÐº£µíÇøÉÏµØÊ®½Ö10ºÅ°Ù¶È´óÏÃÈý²ã	±¾ÉêÇë¹«¿ªÁËÓ¦ÓÃÓÚÖÇÄÜ¼Ò¾ÓÆ½Ì¨µÄÕËºÅ¹ÜÀí·½·¨ºÍ×°ÖÃ¡£¸Ã·½·¨µÄÒ»¾ßÌåÊµÊ©·½Ê½°üÀ¨£º½ÓÊÕÒÑµÇÂ¼ÓÃ»§ÊäÈëµÄ²Ù×÷ÕËºÅ£¬²Ù×÷ÕËºÅ°üÀ¨£ºÒøÐÐ¿¨ÕËºÅ¡¢Ò½±£¿¨ÕËºÅ£»½«ÓÃ»§µÄÆ½Ì¨ÕËºÅÓë²Ù×÷ÕËºÅ½øÐÐ°ó¶¨£¬Æ½Ì¨ÕËºÅÎªÔ¤ÏÈÔÚÖÇÄÜ¼Ò¾ÓÆ½Ì¨ÉÏ×¢²áÓÃÓÚµÇÂ¼ÖÇÄÜ¼Ò¾ÓÆ½Ì¨µÄÕËºÅ£»½«ÖÇÄÜ¼Ò¾ÓÆ½Ì¨µÄÆ½Ì¨±êÊ¶Óë²Ù×÷ÕËºÅ·¢ËÍÖÁµÚÈý·½Æ½Ì¨½øÐÐ×¢²á£¬ÒÔÔÚµÚÈý·½Æ½Ì¨Ö´ÐÐÓë²Ù×÷ÕËºÅ¶ÔÓ¦µÄ²Ù×÷¡£ÊµÏÖÁËÍ¨¹ý½«ÓÃ»§ÔÚÖÇÄÜ¼Ò¾ÓÆ½Ì¨µÄÆ½Ì¨ÕËºÅÓë²Ù×÷ÕËºÅ½øÐ…	Ö§¸¶
Ò»ÖÖÖÇÄÜÊ¶±ðÇ¹Ö§	ÉîÛÚÊÐÇá×¼¿Æ¼¼ÓÐÏÞ¹«Ë¾	2016-05-16	2016-08-03	CN105823376A	Ö÷·ÖÀàºÅ£ºF41C3/00(2006.01)I	ÔÚÉó-ÊµÖÊÉó²éµÄÉúÐ§	518000 ¹ã¶«Ê¡ÉîÛÚÊÐÇ°º£Éî¸ÛºÏ×÷ÇøÇ°ÍåÒ»Â·1ºÅA¶°201ÊÒ£¨Èë×¤ÉîÛÚÊÐÇ°º£ÉÌÎñÃØÊéÓÐÏÞ¹«Ë¾£©	±¾·¢Ã÷ÊôÓÚ¾ü¹¤ÁìÓò£¬¾ßÌåÉæ¼°Ò»ÖÖÖÇÄÜÊ¶±ðÇ¹Ö§¡£ËùÊöÇ¹Ö§°üÀ¨ÎÕ°ÑºÍÖ´ÐÐ»ú¹¹£¬ËùÊöÖ´ÐÐ»ú¹¹°üÀ¨Ç¹Ö§Ëø¶¨×°ÖÃ¡¢ÈËÔ±Ê¶±ð×°ÖÃ¡¢µçÔ´ºÍµçÂ·£¬ËùÊöÈËÔ±Ê¶±ð×°ÖÃÓëËùÊöÇ¹Ö§Ëø¶¨×°ÖÃÍ¨¹ýµçÂ·µçÁª£¬ËùÊöÈËÔ±Ê¶±ð×°ÖÃ°üÀ¨RFIDµ¥ÔªºÍÖ¸ÎÆÊ¶±ðµ¥Ôª£»ËùÊöRFIDµ¥Ôª°üÀ¨ÈËÔ±ÐÅÏ¢ÑéÖ¤¶ËºÍÈËÔ±ÐÅÏ¢¼ÇÂ¼¶Ë¡£ÖÇÄÜÎÕ°ÑÏµÍ³ÄÜ¹»ÊµÏÖÇ¹Ö§µÄ¾«×¼¹ÜÀí£¬½«Ç¹Ö§µÄ¹ÜÀíÈ¨ÏÞÏÞ¶¨ÔÚ¸üÐ¡µÄ·¶Î§ÄÚ£¬Í¬Ê±ÔÚÇ¹Ö§Ê¹ÓÃµÄ¼°Ê±ÐÔÉÏ×öÁË³ä·ÖÓÅ»¯£¬²Ù×÷¸ÐÊÜÈçÍ¬´«Í³Ç¹Ö…	±£ÏÕ
»ùÓÚAndroidÏµÍ³ÖÇÄÜPOS°²È«ÏµÍ³¼°Æô¶¯¡¢Êý¾Ý¹Ü¿Ø·½·¨	¸£½¨ÐÂ´óÂ½Ö§¸¶¼¼ÊõÓÐÏÞ¹«Ë¾	2016-05-17	2016-09-21	CN105957276A	Ö÷·ÖÀàºÅ£ºG07G1/12(2006.01)I	ÓÐÐ§-ÊÚÈ¨	350015 ¸£½¨Ê¡¸£ÖÝÊÐÂíÎ²ÇøÈå½­Î÷Â·1ºÅÐÂ´óÂ½¿Æ¼¼Ô°	±¾·¢Ã÷Éæ¼°Ò»ÖÖ»ùÓÚAndroidÏµÍ³ÖÇÄÜPOS°²È«ÏµÍ³¼°Æô¶¯¡¢Êý¾Ý¹Ü¿Ø·½·¨¡£¸ÃÏµÍ³°üÀ¨Ó¦ÓÃCPU¼°Óë¸ÃÓ¦ÓÃCPUÁ¬½ÓµÄ°²È«CPU£¬Ó¦ÓÃCPU»¹ÓëÍ¨Ñ¶Ä£¿é¡¢ÏÔÊ¾ÆÁ¡¢ÄÚ´æ´æ´¢Æ÷Á¬½Ó£¬°²È«CPU»¹Óë´¥ÃþÆÁ¡¢½Ó´¥IC¿¨¶Á¿¨Æ÷¡¢·Ç½Ó´¥IC¿¨¶Á¿¨Æ÷¡¢´Å¿¨¶Á¿¨Æ÷¡¢ÎïÀí°²È«µçÂ·Á¬½Ó¡£±¾·¢Ã÷ÓÐÐ§±£»¤ÁËÒøÐÐ¼Ó½âÃÜÃØÔ¿¡¢ÓÃ»§ÃÜÂëºÍÕËºÅÊý¾ÝµÈ½»Ò×Ãô¸ÐÐÅÏ¢£¬²¢ÓÐÐ§¸ôÀëÁËÕâÐ©Ãô¸ÐÊý¾ÝÓëAndroidÏµÍ³µÄÁªÏµ£¬Í¬Ê±£¬Ìá¹©Ç©ÃûÑéÖ¤»úÖÆÓÐÐ§±£»¤ÁËAndroidÏµÍ³ºÍAPPµ…	°²È«
Êý¾Ý´¦Àí·½·¨¼°×°ÖÃ	ÉîÛÚ¿É´÷Éè±¸ÎÄ»¯·¢Õ¹ÓÐÏÞ¹«Ë¾	2016-05-30	2016-09-28	CN105975874A	Ö÷·ÖÀàºÅ£ºG06F21/62(2013.01)I	ÔÚÉó-ÊµÖÊÉó²éµÄÉúÐ§	518000 ¹ã¶«Ê¡ÉîÛÚÊÐÇ°º£Éî¸ÛºÏ×÷ÇøÇ°ÍåÒ»Â·1ºÅA¶°201ÊÒ£¨Èë×¤ÉîÛÚÊÐÇ°º£ÉÌÎñÃØÊéÓÐÏÞ¹«Ë¾£©	±¾·¢Ã÷¹«¿ªÁËÒ»ÖÖÊý¾Ý´¦Àí·½·¨£¬°üÀ¨£ºÔÚ½ÓÊÕµ½µÚÒ»ÖÕ¶Ë·¢ËÍµÄµÚÒ»ÌØÕ÷ÐÅÏ¢Ê±£¬»ñÈ¡µÚÒ»ÌØÕ÷ÐÅÏ¢¶ÔÓ¦µÄµÚÒ»ÕË»§ÐÅÏ¢£»ÔÚµÚÒ»ÌØÕ÷ÐÅÏ¢ÖÐÌáÈ¡ÓÃ»§µÄÐÔ±ðÐÅÏ¢£¬ÔÚÔ¤ÉèµÄÊý¾Ý¿âÖÐ»ñÈ¡µÚ¶þÌØÕ÷ÐÅÏ¢£»½«µÚÒ»ÌØÕ÷ÐÅÏ¢ÓëµÚ¶þÌØÕ÷ÐÅÏ¢½øÐÐ±È¶Ô²Ù×÷£»»ñÈ¡ÓëµÚÒ»ÌØÕ÷ÐÅÏ¢µÄÏàËÆ¶È´óÓÚÔ¤ÉèãÐÖµµÄµÚ¶þÌØÕ÷ÐÅÏ¢¶ÔÓ¦µÄµÚ¶þÕË»§ÐÅÏ¢£¬²¢½«µÚ¶þÕË»§ÐÅÏ¢·¢ËÍÖÁµÚÒ»ÖÕ¶Ë¡£±¾·¢Ã÷»¹¹«¿ªÁËÒ»ÖÖÊý¾Ý´¦Àí×°ÖÃ¡£±¾·¢Ã÷Í¨¹ýµÚÒ»ÌØÕ÷ÐÅÏ¢ÓëµÚ¶þÌØÕ÷ÐÅÏ¢µÄ±È¶…	°²È«
ÖÇÄÜÊÖ±í¡¢´¥·¢ÖÇÄÜÊÖ±í¹¤×÷µÄ×°ÖÃ¼°·½·¨	Å¬±ÈÑÇ¼¼ÊõÓÐÏÞ¹«Ë¾	2016-05-30	2016-11-02	CN106066691A	Ö÷·ÖÀàºÅ£ºG06F3/01(2006.01)I	ÔÚÉó-ÊµÖÊÉó²éµÄÉúÐ§	518057 ¹ã¶«Ê¡ÉîÛÚÊÐÄÏÉ½Çø¸ßÐÂÇø±±»·´óµÀ9018ºÅ´ó×å´´ÐÂ´óÏÃAÇø6-8²ã¡¢10-11²ã¡¢BÇø6²ã¡¢CÇø6-10²ã	±¾·¢Ã÷¹«¿ªÁËÒ»ÖÖÖÇÄÜÊÖ±í¡¢´¥·¢ÖÇÄÜÊÖ±í¹¤×÷µÄ×°ÖÃ¼°·½·¨£¬ÆäÖÐ£¬¸ÃÖÇÄÜÊÖ±í°üÀ¨£ºµçÈÝÊ½Ö¸ÎÆÆ÷¼þ£¬ÉèÖÃÔÚÖÇÄÜÊÖ±íµÄ²à±ß¿ò£¬½ÓÊÕÓÃ»§µÄ´¥·¢²Ù×÷£»´¦ÀíÆ÷£¬ÅÐ¶Ï´¥·¢²Ù×÷µÄÀàÐÍ£¬¸ù¾Ý´¥·¢²Ù×÷µÄÀàÐÍÈ·¶¨´¥·¢²Ù×÷¶ÔÓ¦µÄ¶¯×÷£¬²¢Ö´ÐÐ¶ÔÓ¦µÄ¶¯×÷¡£±¾·¢Ã÷½«µçÈÝÊ½Ö¸ÎÆÆ÷¼þÓëÖÇÄÜÊÖ±íÏà½áºÏ£¬¸ù¾ÝµçÈÝÊ½Ö¸ÎÆÆ÷¼þÄÜ¹»»ñÈ¡´¥·¢²Ù×÷µÄÌØµã£¬Í¨¹ý´¥·¢²Ù×÷¿ìËÙÆô¶¯ÖÇÄÜÊÖ±íµÄ¸÷¹¦ÄÜ£¬²¢ÇÒ£¬»¹ÄÜÍ¨¹ýµçÈÝÊ½Ö¸ÎÆÆ÷¼þÊµÏÖÖ§¸¶¡¢¼øÈ¨µÈ¹¦ÄÜ£¬ÔÚÌ…	°²È«
ÐéÄâ¿¨ÖÕ¶ËÖÐ½øÐÐNFCÖ§¸¶µÄ·½·¨¼°ÐéÄâ¿¨ÖÕ¶Ë	Çàµºº£ÐÅÒÆ¶¯Í¨ÐÅ¼¼Êõ¹É·ÝÓÐÏÞ¹«Ë¾	2016-05-31	2016-08-31	CN105916135A	Ö÷·ÖÀàºÅ£ºH04W8/20(2009.01)I	ÓÐÐ§-ÊµÖÊÉó²éµÄÉúÐ§	266071 É½¶«Ê¡ÇàµºÊÐÊÐÄÏÇø½­Î÷Â·11ºÅ	±¾·¢Ã÷¹«¿ªÁËÒ»ÖÖÐéÄâ¿¨ÖÕ¶Ë½øÐÐNFCÖ§¸¶µÄ·½·¨¼°ÐéÄâ¿¨ÖÕ¶Ë£¬ÓÃÒÔÎªÔÚÐéÄâ¿¨ÖÕ¶ËÖÐ±£Ö¤NFCÖ§¸¶µÄ°²È«ÐÔ£¬ÒÔ±ÜÃâÐéÄâ¿¨µÄ¹Ø¼üÊý¾Ý±»·ÇÊÚÈ¨µÄNFCÓ¦ÓÃ·ÃÎÊÌá¹©½â¾ö·½°¸¡£·½·¨Îª£ºÐéÄâ¿¨ÖÕ¶ËÍ¨¹ý½ü¾àÀëÎÞÏßÍ¨ÐÅNFC·þÎñ¹¦ÄÜ¼à²âµç×ÓÕË»§Ñ¡ÔñÊÂ¼þ£¬ËùÊöµç×ÓÕË»§Ñ¡ÔñÊÂ¼þÖÐÐ¯´øµç×ÓÕË»§µÄ±êÊ¶£»ËùÊöÐéÄâ¿¨ÖÕ¶ËÈ·¶¨ËùÊöµç×ÓÕË»§µÄ±êÊ¶¶ÔÓ¦µÄNFCÓ¦ÓÃ£¬»ñÈ¡È·¶¨µÄËùÊöNFCÓ¦ÓÃµÄÇ©Ãû£¬²¢¸ù¾ÝËùÊöNFCÓ¦ÓÃµÄÇ©ÃûÈ·¶¨ËùÊöNFCÓ¦ÓÃ¾ßÓÐ·ÃÎÊÐéÄâ¿¨Ê…	°²È«
Ò»ÖÖ°²È«¼üÅÌµÄ¶ÁÆÁ·½·¨¼°×°ÖÃ	ÉîÛÚÊÐÁªÚÐÐÅÏ¢ÎÞÕÏ°­ÓÐÏÞÔðÈÎ¹«Ë¾	2016-06-03	2016-11-09	CN106096462A	Ö÷·ÖÀàºÅ£ºG06F21/83(2013.01)I	ÔÚÉó-ÊµÖÊÉó²éµÄÉúÐ§	518036 ¹ã¶«Ê¡ÉîÛÚÊÐ¸£ÌïÇøÓêÌïÂ·1ºÅ¸»Á«´óÏÃ1¶°1²ã	±¾·¢Ã÷ÊµÊ©ÀýÌá¹©ÁËÒ»ÖÖ°²È«¼üÅÌµÄ¶ÁÆÁ·½·¨¼°×°ÖÃ£¬ÆäÖÐ·½·¨°üÀ¨£ºµ±¼ì²âµ½°²È«¼üÅÌ¿ªÆôÊ±£¬¼à²âÓÃ»§Õë¶Ô°²È«¼üÅÌÇøÓòµÄÑ¡ÖÐ²Ù×÷Ö¸Áî£¬È·¶¨ËùÊöÑ¡ÖÐ²Ù×÷Ö¸ÁîÑ¡ÖÐµÄËùÊö°²È«¼üÅÌÇøÓòÖÐµÄÄ¿±ê°´¼ü£»ÔÚÔ¤ÉèµÄÓïÒôÊý¾Ý¿âÖÐ»ñÈ¡ËùÊöÄ¿±ê°´¼ü¶ÔÓ¦µÄÓïÒôÊý¾Ý£»²¥·ÅËùÊöÓïÒôÊý¾Ý¡£²ÉÓÃ±¾·¢Ã÷£¬¿ÉÒÔÌá¸ßÖÕ¶ËÉè±¸ÔÚÖ§¸¶Ó¦ÓÃÖÐµÄ²Ù×÷±ãÀûÐÔ£¬ÓÈÆäÊÇÕë¶Ô´æÔÚÒ»¶¨¹¦ÄÜÕÏ°­µÄÈËÈº£¬Æä²Ù×÷±ãÀûÐÔµÄÌá¸ßÓÈÎªÃ÷ÏÔ¡£	°²È«
Ò»ÖÖ»ùÓÚÃæ²¿µÄÊÒÄÚÑ²Âß·ÖÎö·½·¨	ÖìÀ¼Ó¢	2016-06-12	2016-10-12	CN106023263A	Ö÷·ÖÀàºÅ£ºG06T7/20(2006.01)I	ÔÚÉó-ÊµÖÊÉó²éµÄÉúÐ§	315137 Õã½­Ê¡Äþ²¨ÊÐÛ´ÖÝÇøÔÆÁúÕòÀöÔÆÂ·15ºÅ	±¾·¢Ã÷Ìá³öÁËÒ»ÖÖ»ùÓÚÃæ²¿µÄÊÒÄÚÑ²Âß·ÖÎö·½·¨°üÀ¨£ºÔ¤ÏÈ²É¼¯²¢´æ´¢±£°²Ãæ²¿Í¼Ïñ£¬ÌáÈ¡ÌØÕ÷ÐÅÏ¢£¬µÃµ½±£°²µÄÃæ²¿Ñù±¾ÐÅÏ¢£»½«ÊÓÆµ²É¼¯Éè±¸°²×°ÔÚËùÒªÑ²²éµÄÊÒÄÚµÄ¸÷Ö÷ÒªÎ»ÖÃ£¬²¢ÇÒÔÚËùÊöÖ÷ÒªÎ»ÖÃÈ·±£ÖÁÉÙÓÐÒ»¸öÊÓÆµ²É¼¯Éè±¸ÄÜÍêÕû²É¼¯µ½ËùÊöÈËÔ±Ãæ²¿Í¼Ïñ£»µ±ÊÓÆµ²É¼¯Éè±¸¼ì²âµ½ÓÐÈËÔ±µ½À´Ê±£¬Í¨¹ýÊÓÆµ²É¼¯Éè±¸ÌáÈ¡ËùÊöÈËÔ±Ãæ²¿ÌØÕ÷£¬²¢ºËÊµËùÊöÈËÔ±Éí·Ý£»¸ù¾ÝÑ²ÂßÆÚ¼ä»ñÈ¡µÄËùÓÐÈýÎ¬×ø±êµã·ÖÎö¸Ã±£°²µÄÑ²ÊÓ¹ì¼£¡£Í¨¹ýÒÔÉÏ·¢Ã÷£¬¿ÉÊ…	°²È«
Ò»ÖÖ»ùÓÚÃæ²¿µÄÊÒÄÚÑ²Âß·ÖÎöÏµÍ³	ÖìÀ¼Ó¢	2016-06-13	2016-10-12	CN106023264A	Ö÷·ÖÀàºÅ£ºG06T7/20(2006.01)I	ÔÚÉó-ÊµÖÊÉó²éµÄÉúÐ§	315137 Õã½­Ê¡Äþ²¨ÊÐÛ´ÖÝÇøÔÆÁúÕòÀöÔÆÂ·15ºÅ	±¾·¢Ã÷Ìá³öÁËÒ»ÖÖ»ùÓÚÃæ²¿µÄÊÒÄÚÑ²Âß·ÖÎöÏµÍ³£¬Æä°üÀ¨£ºÑù±¾²É¼¯Ä£¿é£¬ÆäÓÃÓÚÔ¤ÏÈ²É¼¯²¢´æ´¢±£°²Ãæ²¿Í¼Ïñ£¬ÌáÈ¡ÌØÕ÷ÐÅÏ¢£¬µÃµ½±£°²µÄÃæ²¿Ñù±¾ÐÅÏ¢£»ºËÊµÄ£¿é£¬ÆäÓÃÓÚµ±ÊÓÆµ²É¼¯Éè±¸¼ì²âµ½ÓÐÈËÔ±µ½À´Ê±£¬Í¨¹ýÊÓÆµ²É¼¯Éè±¸ÌáÈ¡ËùÊöÈËÔ±Ãæ²¿ÌØÕ÷£¬ºËÊµËùÊöÈËÔ±Éí·Ý£»»»ËãÄ£¿é£¬ÆäÓÃÓÚÈç¹ûºËÊµËùÊöÈËÔ±Éí·ÝÊÇ±£°²£¬½«ËùÊöÈËÔ±ÔÚËùÊöÊÓÆµÍ¼ÏñÖÐµÄ¶þÎ¬×ø±ê»»ËãÎªÎïÀíÊÀ½çÖÐµÄÈýÎ¬×ø±êµã£»¹ì¼£·ÖÎöÄ£¿é£¬ÆäÓÃÓÚ¸ù¾ÝÑ²ÂßÆÚ¼ä»ñÈ¡µÄËùÓÐÈýÎ…	°²È«
Ò»ÖÖ½ðÈÚÖÕ¶Ë¡¢°²È«´¦ÀíÆ÷¼°°²È«´¦ÀíÆ÷µÄ¹¤×÷·½·¨	·ÉÌì³ÏÐÅ¿Æ¼¼¹É·ÝÓÐÏÞ¹«Ë¾	2016-06-21	2016-11-16	CN106127084A	Ö÷·ÖÀàºÅ£ºG06F21/71(2013.01)I	ÓÐÐ§-ÊÚÈ¨	100085 ±±¾©ÊÐº£µíÇøÑ§ÇåÂ·9ºÅ»ãÖÇ´óÏÃBÂ¥17²ã	±¾·¢Ã÷¹«¿ªÒ»ÖÖ½ðÈÚÖÕ¶Ë¡¢°²È«´¦ÀíÆ÷¼°°²È«´¦ÀíÆ÷µÄ¹¤×÷·½·¨£¬¸Ã½ðÈÚÖÕ¶Ë°üÀ¨°²È«´¦ÀíÆ÷ºÍ¿¨²Û£¬ËùÊö°²È«´¦ÀíÆ÷ÓëËùÊö¿¨²ÛÁ¬½Ó£¬ËùÊö°²È«´¦ÀíÆ÷Ó²¼þ°üÀ¨µçÆ½×ª»»µçÂ·ºÍ¶ÌÂ·±£»¤µçÂ·£¬ËùÊöµçÆ½×ª»»µçÂ·ºÍ¶ÌÂ·±£»¤µçÂ·ÓÃÓÚÊµÏÖËùÊö½ðÈÚÖÕ¶ËµÄµçÆøÌØÐÔ£»ËùÊö°²È«´¦ÀíÆ÷ÓÃÓÚÊµÏÖ½ðÈÚÖÕ¶ËÓë¿¨Æ¬Ö®¼äµÄÊý¾ÝÍ¨Ñ¶¡£±¾·¢Ã÷µÄ¼¼Êõ·½°¸²ÉÓÃ°²È«´¦ÀíÆ÷ÄÚÖÃµÄ7816±£»¤½Ó¿Ú£¬½«µçÆøÏà¹ØµÄ¹¦ÄÜÓÃ°²È«´¦ÀíÆ÷ÄÚ²¿Èí¼þ´úÂëÀ´ÊµÏÖ£¬½µµÍÁË½ðÈÚÖÕ¶ËµÄ³…	°²È«
ÔË¶¯ÊÖ»·	ÖÐ¹úÒøÐÐ¹É·ÝÓÐÏÞ¹«Ë¾	2016-06-23	2016-08-31	CN105901846A	Ö÷·ÖÀàºÅ£ºA44C5/00(2006.01)I	ÔÚÉó-ÊµÖÊÉó²éµÄÉúÐ§	100818 ±±¾©ÊÐÎ÷³ÇÇø¸´ÐËÃÅÄÚ´ó½Ö1ºÅ	±¾·¢Ã÷Ìá¹©ÁËÒ»ÖÖÔË¶¯ÊÖ»·£¬¸ÃÊÖ»·°üÀ¨£º´æ´¢µ¥Ôª£¬ÓÃÓÚ´æ´¢¶¯Ì¬ÁîÅÆTokenÖÖ×Ó£»ÑéÖ¤µ¥Ôª£¬ÓÃÓÚÔÚ½ÓÊÕµ½ÓÃ»§ÊäÈëµÄ½ðÈÚ½»Ò×Ö¸ÁîÊ±£¬½«´æ´¢µ¥ÔªÖÐµÄTokenÖÖ×ÓÓë¶¯Ì¬ÁîÅÆ·þÎñÆ÷ÖÐ´æ´¢µÄTokenÖÖ×Ó½øÐÐÆ¥Åä£»¶¯Ì¬ÁîÅÆÊý×ÖÉú³Éµ¥Ôª£¬ÓÃÓÚµ±Æ¥Åä³É¹¦Ê±£¬¸ù¾Ý´æ´¢µ¥ÔªÖÐµÄTokenÖÖ×ÓºÍ¶¯Ì¬ÁîÅÆ·þÎñÆ÷ÖÐ´æ´¢µÄTokenÖÖ×Ó£¬½øÐÐ¼ÆËãÉú³ÉÓÃÓÚ½ðÈÚ½»Ò×µÄ¶¯Ì¬ÁîÅÆÊý×Ö¡£ÉÏÊö¼¼Êõ·½°¸¿ÉÒÔÊ¹µÃÔË¶¯ÊÖ»·¾ß±¸ÍøÉÏ½»Ò×Ê¹ÓÃµÄ¶¯Ì¬ÁîÅÆToken£¬Í¬Ê±£¬»¹Ê…	Êý¾Ý·ÖÎö
Ò»ÖÖËÑË÷µÄ·½·¨¡¢×°ÖÃºÍËÑË÷ÒýÇæÏµÍ³	»ªÎª¼¼ÊõÓÐÏÞ¹«Ë¾	2016-06-28	2018-01-05	CN107545004A	Ö÷·ÖÀàºÅ£ºG06F17/30(2006.01)I	ÔÚÉó-ÊµÖÊÉó²éµÄÉúÐ§	518129 ¹ã¶«Ê¡ÉîÛÚÊÐÁú¸ÚÇøÛàÌï»ªÎª×Ü²¿°ì¹«Â¥	±¾·¢Ã÷ÊµÊ©ÀýÉæ¼°Ò»ÖÖËÑË÷µÄ·½·¨£¬¸Ã·½·¨°üÀ¨£ºËÑË÷½Úµã½ÓÊÕ¼øÈ¨·þÎñÆ÷·¢ËÍµÄ¼øÈ¨Æ±¾Ý£¬ËùÊö¼øÈ¨Æ±¾Ý±êÊ¶ÓÃ»§µÄ¼øÈ¨ÐÅÏ¢ÔÚËùÊö¼øÈ¨·þÎñÆ÷¼øÈ¨³É¹¦£»½ÓÊÕÉè±¸ÊµÀý¿ØÖÆÆ÷·¢ËÍµÄÖÁÉÙÒ»¸öÊý¾Ý½ÚµãµÄÁ¬½ÓÐÅÏ¢£¬ËùÊöÖÁÉÙÒ»¸öÊý¾Ý½Úµã¹éÊôÓÚËùÊöÓÃ»§£»½ÓÊÕËùÊöÓÃ»§µÄËÑË÷ÇëÇó£»¸ù¾ÝËùÊöÖÁÉÙÒ»¸öÊý¾Ý½ÚµãµÄÁ¬½ÓÐÅÏ¢·Ö±ðÀûÓÃËùÊö¼øÈ¨Æ±¾ÝµÇÂ½Ã¿¸öÊý¾Ý½Úµã£»¸ù¾ÝËùÊöËÑË÷ÇëÇóÔÚËùÊöÃ¿¸öÊý¾Ý½ÚµãÉÏ»ñÈ¡ËÑË÷½á¹û£¬ÒÔ´Ë£¬½â¾öÍ¬Ò»ÓÃ»§¶ÔÆäËùÓµÓ…	Êý¾Ý·ÖÎö
Ò»ÖÖ»ùÓÚ¼ÆËã»úÓ²¼þ½Ó¿ÚµÄÍâ²¿×¼ÈëÉè±¸	ºÚÁú½­°ÁÁ¢¸¨Áú¿Æ¼¼¿ª·¢ÓÐÏÞ¹«Ë¾	2016-06-29	2018-01-05	CN107545168A	Ö÷·ÖÀàºÅ£ºG06F21/34(2013.01)I	ÔÚÉó-¹«¿ª	150090 ºÚÁú½­Ê¡¹þ¶û±õÊÐÄÏ¸ÚÇøÏæ½­Â·92ºÅ8²ã	±¾·¢Ã÷¹«¿ªÁËÒ»ÖÖ»ùÓÚ¼ÆËã»úÓ²¼þ½Ó¿ÚµÄÍâ²¿×¼ÈëÉè±¸£¬°üÀ¨Óë¼ÆËã»ú½Ó¿ÚÖ±½ÓÁ¬½ÓµÄÖÐ¼ä×ª»»½Ó´¥Æ÷£»¼°ÓëÖÐ¼ä×ª»»½Ó´¥Æ÷½Ó´¥Ê½Í¨ÐÅµÄµÇÂ½¿¨£»¼°Óë¼ÆËã»ú½Ó¿ÚÍ¨ÐÅµÄÓ²¼þµÇÂ½Êý¾ÝÍ³¼Æ·þÎñÆ÷£»¼°ÓëÓ²¼þµÇÂ½Êý¾ÝÍ³¼Æ·þÎñÆ÷Í¨ÐÅµÄÓ¦ÓÃ½Ó¿Ú·þÎñÆ÷¡£±¾·¢Ã÷µÄ»ùÓÚ¼ÆËã»úÓ²¼þ½Ó¿ÚµÄÍâ²¿×¼ÈëÉè±¸£¬Í¨¹ýÓ²¼þµÇÂ½£¬¿ÉÒÔ±ÜÃâÕËºÅ±»µÁ¶ø·¢ÉúµÄ²»È·¶¨ÐÔ£¬ÇÒÄÜ¹»È·±£¼ÆËã»ú½Ó¿ÚµÇÂ½Èë¿ÚµÄ°²È«ÐÔ£¬ÊµÏÖÊµÃûÖ§¸¶¡¢Éç½»ºÍÔÚÏßÇ©ÃûµÄ¿ÉÄÜÐÔ¡£	°²È«
Ò»ÖÖÉí·ÝÑéÖ¤·½·¨ÒÔ¼°ÖÕ¶Ë	ÉîÛÚÊÐ½ðÁ¢Í¨ÐÅÉè±¸ÓÐÏÞ¹«Ë¾	2016-06-29	2016-11-09	CN106096585A	Ö÷·ÖÀàºÅ£ºG06K9/00(2006.01)I	ÔÚÉó-ÊµÖÊÉó²éµÄÉúÐ§	518040 ¹ã¶«Ê¡ÉîÛÚÊÐ¸£ÌïÇøÉîÄÏ´óµÀ7028ºÅÊ±´ú¿Æ¼¼´óÏÃ¶«×ù21Â¥	±¾·¢Ã÷ÊµÊ©ÀýÌá¹©ÁËÒ»ÖÖÉí·ÝÑéÖ¤·½·¨£¬°üÀ¨£º»ñÈ¡¾Ö²¿ÈËÁ³Í¼Ïñ£¬ÆäÖÐ£¬ËùÊö¾Ö²¿ÈËÁ³Í¼Ïñ°üÀ¨ÑÛÍâÍ¼ÏñºÍÑÛÄÚÍ¼Ïñ£»¸ù¾ÝËùÊöÑÛÍâÍ¼Ïñ»ñÈ¡ÈËÁ³ÌØÕ÷ÐÅÏ¢£¬ÒÔ¼°¸ù¾ÝËùÊöÑÛÄÚÍ¼Ïñ»ñÈ¡ºçÄ¤ÌØÕ÷ÐÅÏ¢£»ÅÐ¶ÏËùÊöÈËÁ³ÌØÕ÷ÐÅÏ¢ÊÇ·ñÓëµÚÒ»Ô¤ÉèÌØÕ÷ÐÅÏ¢Æ¥Åä£»ÈôÊÇ£¬ÔòÅÐ¶ÏËùÊöºçÄ¤ÌØÕ÷ÐÅÏ¢ÊÇ·ñÓëµÚ¶þÔ¤ÉèÌØÕ÷ÐÅÏ¢Æ¥Åä£»ÈôÊÇ£¬ÔòÍ¨¹ýÉí·ÝÑéÖ¤¡£ÏàÓ¦µÄ£¬±¾·¢Ã÷ÊµÊ©Àý»¹Ìá¹©ÁËÒ»ÖÖÖÕ¶Ë¡£²ÉÓÃ±¾·¢Ã÷ÊµÊ©Àý£¬¿ÉÒÔÊµÏÖÌá¸ß»ùÓÚºçÄ¤Ê¶±ð¼¼ÊõµÄÉí·ÝÑéÖ¤µ…	°²È«
Ò»ÖÖ¾ßÓÐÑÛ¿Ø¼°ºçÄ¤Ê¶±ð¹¦ÄÜµÄVRÑÛ¾µ	±±¾©ÉÏ¹ÅÊÓ¾õ¿Æ¼¼ÓÐÏÞ¹«Ë¾	2016-06-30	2016-09-21	CN105955491A	Ö÷·ÖÀàºÅ£ºG06F3/01(2006.01)I	ÔÚÉó-ÊµÖÊÉó²éµÄÉúÐ§	100124 ±±¾©ÊÐ³¯ÑôÇøÎ÷´óÍûÂ·¼×12ºÅ2ºÅÂ¥£¨¹ú¼Ò¹ã¸æ²úÒµÔ°·õ»¯Æ÷25399ºÅ£©	±¾·¢Ã÷Éæ¼°Ò»ÖÖ¾ßÓÐÑÛ¿Ø¼°ºçÄ¤Ê¶±ð¹¦ÄÜµÄVRÑÛ¾µ£¬°üÀ¨¿ÉÅå´øµÄVRÑÛ¾µÖ÷Ìå£¬ËùÊöVRÑÛ¾µÖ÷Ìå°üÀ¨ÓëÑÛ¾¦¶ÔÓ¦µÄ¾µÍ·×éºÍ´¦Àíµ¥Ôª£¬ËùÊö´¦Àíµ¥ÔªÁ¬½ÓÓÐÏÔÊ¾ÆÁ¡¢½»»¥Ä£¿é¡¢µçÔ´Ä£¿éºÍÍ¨Ñ¶Ä£¿é£¬ËùÊö´¦Àíµ¥ÔªÁ¬½ÓÓÐÉãÏñÍ·ÒÔ¼°ÓëËùÊöÉãÏñÍ·ÏàÅäºÏµÄºìÍâ¹âÔ´¡£±¾·¢Ã÷µÄÓÐÒæÐ§¹ûÎª£º¿É²É¼¯ÓÃ»§ÑÛ¾¦Í¼Ïñ¼°ºçÄ¤ÐÅÏ¢£¬Í¨¹ýºçÄ¤Ê¶±ð¹¦ÄÜÀ´½øÐÐÉí·ÝÈÏÖ¤£¬½øÒ»²½ÊµÏÖºçÄ¤Ê¶±ðÒÆ¶¯Ö§¸¶£¬´Ó¶ø¸ÄÉÆÒÆ¶¯Ö§¸¶µÄ½»»¥ÌåÑé£»Í¬Ñù£¬²É¼¯ÑÛ¾¦ÐÅÏ¢¼°ºçÄ¤ÐÅÏ¢¿…	Ö§¸¶
Ò»ÖÖ»ùÓÚÉúÎïÌØÕ÷¼ÓÃÜµÄÖ¸ÎÆÒ£¿ØÆ÷¼°ÆäÊ¹ÓÃ·½·¨	ÉîÛÚÊÐÄ§Á¦ÐÅÏ¢¼¼ÊõÓÐÏÞ¹«Ë¾	2016-07-05	2016-11-23	CN106162280A	Ö÷·ÖÀàºÅ£ºH04N21/422(2011.01)I	ÔÚÉó-ÊµÖÊÉó²éµÄÉúÐ§	518000 ¹ã¶«Ê¡ÉîÛÚÊÐÄÏÉ½ÇøÔÁº£½ÖµÀ¿Æ¼¼Ô°ÄÏÇøÔÁÐËÈýµÀ9ºÅ»ªÖÐ¿Æ¼¼´óÑ§²úÑ§ÑÐ»ùµØB×ù301	±¾·¢Ã÷Ìá¹©ÁËÒ»ÖÖ»ùÓÚÉúÎïÌØÕ÷¼ÓÃÜµÄÖ¸ÎÆÒ£¿ØÆ÷£¬¸ÃÉè±¸Ö÷Òª°üº¬£ºÖ¸ÎÆÐ¾Æ¬¡¢Ò£¿ØÆ÷Ö÷¿ØÐ¾Æ¬¡¢ÓëÖÇÄÜÖÕ¶ËµÄÎÞÏß½Ó¿Ú¡£Æä·½·¨ÊÇ£ºÓÃ»§ÔÚÖ¸ÎÆÐ¾Æ¬ÉÏÉ¨ÃèÖ¸ÎÆ£¬Ö¸ÎÆÐ¾Æ¬ÌáÈ¡ÌØÕ÷£¬²¢½øÐÐ¼ÓÃÜ¡£Ö÷¿ØÐ¾Æ¬¶Ô¼ÓÃÜµÄÖ¸ÎÆÌØÕ÷ÎÞÏß´«Êä¸øÖÇÄÜµçÊÓ/ÖÇÄÜ»ú¶¥ºÐ£»¸ÃÖ¸ÎÆÌØÕ÷ÓÃÓÚ×¢²á»òÕßµÇÂ½µÄ¼ÓÃÜÉèÖÃ£¬ÔÚµÇÂ½µÄÊ±¶ÔÒÑ×¢²áµÄÖ¸ÎÆ½øÐÐ±È¶Ô£¬Èç¹û±È¶Ô³É¹¦£¬Ö§³ÖÖ¸ÎÆÊ¶±ð£¬Èô±È¶ÔÊ§°Ü£¬Ôò¾Ü¾øÏàÓ¦µÄ²Ù×÷£¬Í¨¹ýÖ¸ÎÆÊ¶±ð¸öÈËID£¬ÊµÏÖ¸öÐÔ»¯ÊÓÆµ½çÃæ…	°²È«
Ò»ÖÖ²ÆÎñÊý¾Ý°²È«¹ÜÀí´¦ÀíÏµÍ³	»´ÄÏÊ¦·¶Ñ§Ôº	2016-07-14	2017-01-04	CN106295361A	Ö÷·ÖÀàºÅ£ºG06F21/60(2013.01)I	ÓÐÐ§-ÊÚÈ¨	232001 °²»ÕÊ¡»´ÄÏÊÐÌï¼ÒâÖÇø¶´É½Î÷Â·238ºÅ	±¾·¢Ã÷Éæ¼°²ÆÎñ¹ÜÀíÁìÓò£¬ÓÈÆäÊÇÒ»ÖÖ²ÆÎñÊý¾Ý°²È«¹ÜÀí´¦ÀíÏµÍ³£¬°üÀ¨×ÜÕËÏµÍ³¡¢½áÕËÏµÍ³¡¢³öÄÉ¹ÜÀíÄ£¿é¡¢ÕË²¾±¨±íÄ£¿é¡¢ÒµÎñ´¦ÀíÄ£¿é¡¢»ù´¡×ÊÁÏÕûÀíÄ£¿éºÍ°²È«¹ÜÀíÄ£¿é£¬½áÕËÏµÍ³¡¢³öÄÉ¹ÜÀíÄ£¿é¡¢ÕË²¾±¨±íÄ£¿é¡¢ÒµÎñ´¦ÀíÄ£¿é¡¢»ù´¡×ÊÁÏÕûÀíÄ£¿éºÍ°²È«¹ÜÀíÄ£¿é¾ùÓë×ÜÕËÏµÍ³Á¬½Ó£¬°²È«¹ÜÀíÄ£¿é°üÀ¨°²È«¼Ó¹Ì¡¢°²È«·þÎñ¡¢°²È«Íø¹ÜºÍ°²È«Éó¼Æ£¬°²È«¼Ó¹Ì¡¢°²È«·þÎñ¡¢°²È«Íø¹ÜºÍ°²È«Éó¼ÆÖ®¼ä±Õ»·Á¬½Ó¡£±¾·¢Ã÷ÓÐÒæÐ§¹ûÊÇÄÜ¹»·½±ãÓÃ»§²Ù×÷²…	°²È«
Ò»ÖÖÉí·ÝÊ¶±ð·½·¨	ÁøÖÝÁú»Ô¿Æ¼¼ÓÐÏÞ¹«Ë¾	2016-07-19	2016-11-30	CN106169040A	Ö÷·ÖÀàºÅ£ºG06F21/32(2013.01)I	ÔÚÉó-ÖøÂ¼ÊÂÏî±ä¸ü	545005 ¹ãÎ÷×³×å×ÔÖÎÇøÁøÖÝÊÐÁøÄÏÇø³ÇÕ¾Â·94ºÅÐÂÊ±´úÉÌÒµ¸ÛÎïÁ÷ÅäËÍ²Ö´¢ÖÐÐÄ×ÛºÏ5ºÅÂ¥4²ã022ºÅ	±¾·¢Ã÷Ìá¹©Ò»ÖÖÉí·ÝÊ¶±ð·½·¨£¬Æä°üÀ¨ÒÔÏÂ²½Öè£º²½ÖèÒ»¡¢Í¨¹ý½«Éí·ÝÊ¶±ð×°ÖÃÓëÉÌ³¡µÄÖ§¸¶ÖÕ¶Ë°ó¶¨£»²½Öè¶þ¡¢ÓÃ»§Ïû·ÑÊ±£¬¶ÔÓÃ»§Éí·Ý½øÐÐÊ¶±ð£»²½ÖèÈý¡¢¸ù¾ÝÊ¶±ð½á¹û£¬½øÐÐÏàÓ¦´¦Àí¡£±¾·¢Ã÷Í¨¹ý²É¼¯ÈËÌåÉúÎïÌØÕ÷Êý¾Ý£¬±£Ö¤Êý¾ÝµÄÎ¨Ò»ÐÔ£¬²¢ÇÒÊ¶±ðÑéÖ¤¹ý³Ì¸ßÐ§±ã½Ý£¬°²È«¿É¿¿£¬ÊÊÓÃÓÚ¸÷ÖÖÐèÒªÑéÖ¤Éí·ÝµÄ³¡ºÏ¡£	°²È«
Ò»ÖÖÍ¨ÓÃTAÖ§¸¶Æ½Ì¨ºÍÖ§¸¶·½·¨	ºã±¦¹É·ÝÓÐÏÞ¹«Ë¾	2016-07-21	2016-12-14	CN106228072A	Ö÷·ÖÀàºÅ£ºG06F21/57(2013.01)I	ÔÚÉó-ÊµÖÊÉó²éµÄÉúÐ§	212355 ½­ËÕÊ¡Õò½­ÊÐºáÌÁ¹¤ÒµÇø	±¾·¢Ã÷¹«¿ªÁËÒ»ÖÖÍ¨ÓÃTAÖ§¸¶Æ½Ì¨ºÍÖ§¸¶·½·¨£¬Éæ¼°ÒÆ¶¯Ö§¸¶¼¼ÊõÁìÓò£¬½â¾öÁËÏÖÓÐ¼¼ÊõÖÐTAµÄ¿ª·¢ÄÑ¶ÈºÍ¿ª·¢³É±¾¸ßµÄ¼¼ÊõÎÊÌâ¡£¸ÃÍ¨ÓÃTAÖ§¸¶Æ½Ì¨°üÀ¨£ºÍ¨ÐÅÄ£¿é¡¢´æ´¢Ä£¿éºÍ°²È«ÓÃ»§½»»¥Ä£¿é£»ÆäÖÐ£¬Í¨ÐÅÄ£¿éÓÃÓÚÓëTA½øÐÐÍ¨ÐÅ£¬ÔÚTAºÍÍ¨ÓÃTAÖ§¸¶Æ½Ì¨Ö®¼ä½¨Á¢Êý¾ÝºÍÖ¸Áî´«ÊäµÄÍ¨µÀ£»´æ´¢Ä£¿éÖÐ·â×°ÓÐ»ùÓÚ±ê×¼GP?TEE¹æ·¶µÄTEE?OSÌá¹©µÄ±ê×¼½Ó¿Ú£¬ÇÒÓÃÓÚÌá¹©¶à¸ö°²È«´æ´¢¿Õ¼ä£¬²»Í¬µÄ°²È«´æ´¢¿Õ¼äÓÃÓÚ·â×°²»Í¬µÄTEE?OSµÄÎÄ¼þºÍ¶ÔÏó²Ù×÷£…	Ö§¸¶
Ò»ÖÖÖ§¸¶·½·¨¼°ÒÆ¶¯ÖÕ¶Ë	Öéº£ÊÐ÷È×å¿Æ¼¼ÓÐÏÞ¹«Ë¾	2016-07-22	2016-12-07	CN106204027A	Ö÷·ÖÀàºÅ£ºG06Q20/32(2012.01)I	ÔÚÉó-ÊµÖÊÉó²éµÄÉúÐ§	519000 ¹ã¶«Ê¡Öéº£ÊÐ¿Æ¼¼´´ÐÂº£°¶÷È×å¿Æ¼¼Â¥	±¾·¢Ã÷ÊµÊ©Àý¹«¿ªÁËÒ»ÖÖÖ§¸¶·½·¨¼°ÒÆ¶¯ÖÕ¶Ë£¬ÓÃÓÚÌá¸ßÖ§¸¶Ð§ÂÊ¡£±¾·¢Ã÷ÊµÊ©ÀýÖÐµÄÒÆ¶¯ÖÕ¶Ë°üÀ¨µÚÒ»ÆÁÄ»ºÍµÚ¶þÆÁÄ»¡£±¾·¢Ã÷ÊµÊ©Àý·½·¨°üÀ¨£º»ñÈ¡¶ÔÔ¤ÖÃÖ§¸¶Ó¦ÓÃµÄ´¥·¢²Ù×÷£»¸ù¾ÝËùÊö´¥·¢²Ù×÷ÔÚËùÊöµÚÒ»ÆÁÄ»Æô¶¯ËùÊöÔ¤ÖÃÖ§¸¶Ó¦ÓÃ£»»ñÈ¡ËùÊöÔ¤ÖÃÖ§¸¶Ó¦ÓÃÖÐµÄÖ§¸¶±àÂë£¬²¢½«ËùÊöÖ§¸¶±àÂëÍÆËÍÖÁËùÊöµÚ¶þÆÁÄ»µÄ½çÃæ£¬ÒÔÊ¹É¨ÃèÉè±¸É¨ÃèËùÊöÖ§¸¶±àÂë½øÐÐÖ§¸¶¡£	Ö§¸¶
Ò»ÖÖÃÜÂëÑéÖ¤·½·¨¼°×°ÖÃ¡¢ÒÆ¶¯ÖÕ¶Ë	ÖÐÐËÍ¨Ñ¶¹É·ÝÓÐÏÞ¹«Ë¾	2016-07-28	2018-02-06	CN107665294A	Ö÷·ÖÀàºÅ£ºG06F21/31(2013.01)I	ÔÚÉó-¹«¿ª	518057 ¹ã¶«Ê¡ÉîÛÚÊÐÄÏÉ½Çø¸ßÐÂ¼¼Êõ²úÒµÔ°¿Æ¼¼ÄÏÂ·ÖÐÐËÍ¨Ñ¶´óÏÃ	±¾·¢Ã÷ÊµÊ©ÀýÌá¹©Ò»ÖÖÃÜÂëÑéÖ¤·½·¨¡¢×°ÖÃ¡¢ÒÆ¶¯ÖÕ¶ËÒÔ¼°¼ÆËã»ú´æ´¢½éÖÊ£¬Í¨¹ý»ñÈ¡Éí·ÝÑéÖ¤ÐÅÏ¢£¬¸ù¾ÝÔ¤´æµÄºÏ·¨ÑéÖ¤ÐÅÏ¢¶ÔÉí·ÝÑéÖ¤ÐÅÏ¢½øÐÐÆ¥ÅäÑéÖ¤£¬µ±Éí·ÝÑéÖ¤ÐÅÏ¢ÓëºÏ·¨ÑéÖ¤ÐÅÏ¢Æ¥ÅäÊ±£¬Ôò¸ÃÉí·ÝÑéÖ¤ÐÅÏ¢ÑéÖ¤Í¨¹ý£¬²¢½øÐÐ½âËø»òÕßÖ§¸¶´¦Àí£»µ±»ñÈ¡µ½µÄÑéÖ¤²ÎÊýÇÒÍ¬Ê±ÖÕ¶ËµÄÔËÐÐ²ÎÊýÓëºÏ·¨ÑéÖ¤²ÎÊýÖÐµÄÔ­Ê¼ÑéÖ¤²ÎÊýºÍÔ­Ê¼ÔËÐÐ²ÎÊýÏàÆ¥ÅäÊ±£¬²ÅÄÜÍ¨¹ýÉí·ÝÑéÖ¤£¬½ø¶øÌá¸ßÁËÃÜÂëÑéÖ¤µÄ°²È«ÐÔ£¬½øÒ»²½±£Ö¤ÁËÓÃ»§ÐÅÏ¢µÄ°²È«£¬·½±ãÁËÓ…	°²È«
Êý¾Ý´¦ÀíÏµÍ³ºÍ·½·¨	±±¾©ÃîÒ½¼ÑÐÅÏ¢¼¼ÊõÓÐÏÞ¹«Ë¾	2016-08-08	2017-01-18	CN106339032A	Ö÷·ÖÀàºÅ£ºG06F1/16(2006.01)I	ÔÚÉó-ÊµÖÊÉó²éµÄÉúÐ§	100022 ±±¾©ÊÐ³¯ÑôÇøÎ÷´óÍûÂ·¼×12ºÅ¹ú¼Ò¹ã¸æ²úÒµÔ°Ö÷Â¥AB¶°2²ã	±¾·¢Ã÷Ìá³öÁËÒ»ÖÖÊý¾Ý´¦ÀíÏµÍ³ºÍ·½·¨£¬¸ÃÊý¾Ý´¦ÀíÏµÍ³°üÀ¨£º½ÓÊÕÄ£¿é£¬ÓÃÓÚ½ÓÊÕÖÁÉÙÒ»¸öÖÇÄÜ´©´÷Éè±¸·¢ËÍµÄÈËÌåµÄÌåÕ÷ÐÅÏ¢£»·ÖÀàÄ£¿é£¬ÓÃÓÚ¸ù¾ÝÈËÌåÉú»¯Ö¸±êÎ¬¶ÈµÄ·ÖÀà±ê×¼£¬¶ÔÌåÕ÷ÐÅÏ¢½øÐÐ·ÖÀà£»ÒÔ¼°·¢ËÍÄ£¿é£¬ÓÃÓÚ½«·ÖÀàºóµÄÌåÕ÷ÐÅÏ¢·¢ËÍÖÁÒÆ¶¯Éè±¸¡£±¾·¢Ã÷Í¨¹ý½ÓÊÕÖÁÉÙÒ»¸öÖÇÄÜ´©´÷Éè±¸·¢ËÍµÄÈËÌåµÄÌåÕ÷ÐÅÏ¢£¬Ëæºó¸ù¾ÝÈËÌåÉú»¯Ö¸±êÎ¬¶ÈµÄ·ÖÀà±ê×¼£¬¶ÔÌåÕ÷ÐÅÏ¢½øÐÐ·ÖÀà£¬×îºó½«·ÖÀàºóµÄÌåÕ÷ÐÅÏ¢·¢ËÍÖÁÒÆ¶¯Éè±¸£¬¸ÃÊý¾Ý´¦ÀíÏµÍ³Ä…	Êý¾Ý·ÖÎö
ÒÆ¶¯ÖÕ¶Ë·ÀµÁ·½·¨¼°ÏµÍ³	ÓîÁú¼ÆËã»úÍ¨ÐÅ¿Æ¼¼£¨ÉîÛÚ£©ÓÐÏÞ¹«Ë¾	2016-08-19	2017-01-25	CN106355054A	Ö÷·ÖÀàºÅ£ºG06F21/31(2013.01)I	ÔÚÉó-ÊµÖÊÉó²éµÄÉúÐ§	518057 ¹ã¶«Ê¡ÉîÛÚÊÐÄÏÉ½Çø¿Æ¼¼Ô°±±ÇøÃÎÏªµÀ2ºÅ	Ò»ÖÖÒÆ¶¯ÖÕ¶Ë·ÀµÁ·½·¨£¬°üÀ¨£ºÔÚÒÆ¶¯ÖÕ¶ËµÄ·ÀµÁÄ£Ê½¿ªÆôºó£¬ÔÚ´ý»ú×´Ì¬Ê±Õì²âÓÃ»§ÊÇ·ñÐèÒª½âËøËùÊöÒÆ¶¯ÖÕ¶Ë£»Õì²âµ½ÓÃ»§ÐèÒª½âËøËùÊöÒÆ¶¯ÖÕ¶ËÊ±£¬ÌáÊ¾ÓÃ»§ÊäÈë½âËøÖ§¸¶½ð£»ÔÚÔ¤ÉèÊ±¼äÄÚ½ÓÊÕµ½ÓÃ»§µÄÈ·ÈÏ²Ù×÷Ê±£¬µ÷³öÖ§¸¶½çÃæ¹©ÓÃ»§Ö§¸¶½âËøÖ§¸¶½ð£»ÔÚÓÃ»§Ö§¸¶µÄ½âËøÖ§¸¶½ðÓëÔ¤ÏÈÉèÖÃµÄ½âËøÖ§¸¶½ðÒ»ÖÂÊ±£¬³É¹¦½âËø£»»òµ±ÓÃ»§Ö§¸¶µÄ½âËøÖ§¸¶½ðÓëÔ¤ÏÈÉèÖÃµÄ½âËøÖ§¸¶½ð²»Ò»ÖÂÊ±£¬½øÈë¼Ù½âËøÄ£Ê½£¬¼ÇÂ¼ÓÃ»§´Ë´ÎµÄÖ§¸¶ÐÅÏ¢¡£±¾·¢Ã÷»¹Ìá¹…	°²È«
»ùÓÚÐéÄâÏÖÊµ³¡¾°µÄÈÏÖ¤ºÍ×°ÖÃ	ÌÚÑ¶¿Æ¼¼£¨ÉîÛÚ£©ÓÐÏÞ¹«Ë¾	2016-08-19	2016-11-16	CN106131057A	Ö÷·ÖÀàºÅ£ºH04L29/06(2006.01)I	ÓÐÐ§-ÊÚÈ¨	518000 ¹ã¶«Ê¡ÉîÛÚÊÐ¸£ÌïÇøÕñÐËÂ·Èü¸ñ¿Æ¼¼Ô°2¶°¶«403ÊÒ	±¾·¢Ã÷¹«¿ªÁËÒ»ÖÖ»ùÓÚÐéÄâÏÖÊµ³¡¾°µÄÈÏÖ¤ºÍ×°ÖÃ¡£ÆäÖÐ£¬¸Ã·½·¨°üÀ¨£ºÔÚÐéÄâÏÖÊµ³¡¾°ÖÐ½ÓÊÕµ½ÈÏÖ¤ÇëÇó£»Í¨¹ýÏÖÊµ³¡¾°ÖÐµÄÖ¸ÎÆ²É¼¯Éè±¸²É¼¯´ýÈÏÖ¤Ö¸ÎÆÐÅÏ¢£»½«´ýÈÏÖ¤Ö¸ÎÆÐÅÏ¢·¢ËÍÖÁÏÖÊµ³¡¾°ÖÐµÄÈÏÖ¤Éè±¸£»ÔÚÐéÄâÏÖÊµ³¡¾°ÖÐ½ÓÊÕÈÏÖ¤Éè±¸·¢ËÍµÄÈÏÖ¤½á¹ûÐÅÏ¢£¬ÆäÖÐ£¬ÈÏÖ¤½á¹ûÐÅÏ¢ÓÃÓÚÖ¸Ê¾´ýÈÏÖ¤Ö¸ÎÆÐÅÏ¢Í¨¹ýÈÏÖ¤»òÎ´Í¨¹ýÈÏÖ¤¡£±¾·¢Ã÷½â¾öÁËÏà¹Ø¼¼ÊõÔÚÐéÄâÏÖÊµ³¡¾°ÖÐÖ§¸¶Ê±ÐèÒªÔÚÐéÄâÏÖÊµ³¡¾°ÖÐ½¨Á¢Ö§¸¶ÈÏÖªÏµÍ³£¬ÕâÑù½«»áµ¼ÖÂÔÚÐéÄâÏÖÊ…	Ö§¸¶
Ò»ÖÖÐÂÐÍºçÄ¤ÖÇÄÜÖ§¸¶ÊÖ»ú	ÉîÛÚÊÐÇ°º£Áì´´ÖÇÄÜ¿Æ¼¼ÓÐÏÞ¹«Ë¾	2016-08-19	2016-11-16	CN106127477A	Ö÷·ÖÀàºÅ£ºG06Q20/32(2012.01)I	ÔÚÉó-ÊµÖÊÉó²éµÄÉúÐ§	518000 ¹ã¶«Ê¡ÉîÛÚÊÐÇ°º£Éî¸ÛºÏ×÷ÇøÇ°ÍåÒ»Â·1ºÅA¶°201ÊÒ£¨Èë×¤ÉîÛÚÊÐÇ°º£ÉÌÎñÃØÊéÓÐÏÞ¹«Ë¾£©	±¾·¢Ã÷Ìá¹©Ò»ÖÖÐÂÐÍºçÄ¤ÖÇÄÜÖ§¸¶ÊÖ»ú£¬°üÀ¨ÊÖ»ú»úÉíÒÔ¼°ÊÖ»ú»úÉíÄÚ²¿Ö÷°åÉÏµÄ´¦ÀíÆ÷¡¢ºçÄ¤ÉãÏñÍ·¡¢ÈýÉ«Ö¸Ê¾µÆ¡¢¾àÀë¸ÐÓ¦Æ÷¡¢ºçÄ¤µÆ¡¢Ç°ÉãÏñÍ·ºÍºóÉãÏñÍ·£»ÊÖ»ú»úÉíÄÚ²¿µÄÐ¡°åÉÏÉèÖÃÓÐÂí´ï¡¢Âó¿Ë·ç¡¢À®°ÈºÍÖ÷ÌìÏßµ¯Æ¬£»ºçÄ¤ÉãÏñÍ·Í¨¹ýÉ¨ÃèÓÃ»§µÄºçÄ¤ÌØÕ÷£¬½«É¨ÃèÊ¶±ðÐÅÏ¢´«Êä¸øÖ÷°åÉÏµÄ¶ÔÓ¦¹¦ÄÜ²¿¼þ½øÐÐÐÅºÅµÄ´¦ÀíºÍ¶Ô±È£¬½øÐÐÉí·ÝÊ¶±ð£¬±¾Éè¼ÆÀûÓÃºçÄ¤ÉãÏñÍ·½øÐÐÉí·ÝÊ¶±ðÉ¨ÃèÈÏÖ¤£¬ÓÃ»§Ö»Ðè¶ÌÔÝÄýÊÓÊÖ»úÆÁÄ»¼´¿É×Ô¶¯½âËø£¬Éí·ÝÊ¶±…	Ö§¸¶
Ò»ÖÖ·ÀµÁÇ®¼ÐµÄ·ÀµÁ¿ØÖÆ·½·¨	±±º£ÊÐÔÌÐ¾µç×Ó¿Æ¼¼ÓÐÏÞ¹«Ë¾	2016-08-19	2016-12-21	CN106235553A	Ö÷·ÖÀàºÅ£ºA45C1/06(2006.01)I	ÓÐÐ§-ÊµÖÊÉó²éµÄÉúÐ§	536000 ¹ãÎ÷×³×å×ÔÖÎÇø±±º£ÊÐ¹¤ÒµÔ°ÇøÖÐ¹úµç×Ó²úÒµÔ°A01¶°Èý²ãÎ÷08AÊÒ£¨±±º£ÊÐÌ¨ÍåÂ·ÒÔ±±¡¢±±º£´óµÀÒÔÎ÷£©	±¾·¢Ã÷¹«¿ªÁËÒ»ÖÖ·ÀµÁÇ®¼ÐµÄ·ÀµÁ¿ØÖÆ·½·¨£¬ÓÉÓÚÖ÷Òª°üÀ¨£ºÇ®¼ÐÖ÷ÈËÍ¨¹ýÊÖ»úÏòÇ®¼ÐÖÐµÄ¶ÌÐÅÄ£¿é·¢ËÍ¡°¶¨Î»¡±ÐÅÏ¢£»Ç®¼ÐGPS¶¨Î»Ä£¿éÆô¶¯ºó¿ªÊ¼¶¨Î»£¬Í¬Ê±±¨¾¯Ä£¿é¿ªÊ¼±¨¾¯£»GPS¶¨Î»Ä£¿é½«¶¨Î»ÐÅÏ¢´æ´¢ÖÁ´æ´¢Æ÷£¬¾­Î¢´¦ÀíÆ÷´¦ÀíºóÍ¨¹ý¶ÌÐÅÍ¨Ñ¶Ä£¿é·¢ËÍÖÁÄ¿±êÊÖ»ú£¬Ç®¼ÐÖ÷ÈËÍ¨¹ý¶¨Î»ÐÅÏ¢ÕÒµ½Ç®¼Ð£¬Í¬Ê±Ç®¼ÐÖ÷ÈË½áºÏ±¨¾¯µÄÉù½øÐÐÑ°ÕÒ£»´Ó¶ø¿ÉÒÔ¿Ë·þÏÖÓÐ¼¼ÊõÖÐÊ§Ö÷ÎÞ·¨¶Ô¶ªÊ§ÎïÆ·½øÐÐ¸ú×ÙµÈÓÅµã¡£	°²È«
Ò»ÖÖ·ÀµÁÇ®¼ÐµÄ·ÀµÁ¿ØÖÆ·½·¨	±±º£ÊÐÔÌÐ¾µç×Ó¿Æ¼¼ÓÐÏÞ¹«Ë¾	2016-08-19	2016-12-21	CN106235552A	Ö÷·ÖÀàºÅ£ºA45C1/06(2006.01)I	ÓÐÐ§-ÊµÖÊÉó²éµÄÉúÐ§	536000 ¹ãÎ÷×³×å×ÔÖÎÇø±±º£ÊÐ¹¤ÒµÔ°ÇøÖÐ¹úµç×Ó²úÒµÔ°A01¶°Èý²ãÎ÷08AÊÒ£¨±±º£ÊÐÌ¨ÍåÂ·ÒÔ±±¡¢±±º£´óµÀÒÔÎ÷£©	±¾·¢Ã÷¹«¿ªÁËÒ»ÖÖ·ÀµÁÇ®¼ÐµÄ·ÀµÁ¿ØÖÆ·½·¨£¬ÓÉÓÚÖ÷Òª°üÀ¨£ºÇ®¼ÐÖ÷ÈËÍ¨¹ýÊÖ»úÏòÇ®¼ÐÖÐµÄ¶ÌÐÅÄ£¿é·¢ËÍ¡°¶¨Î»¡±ÐÅÏ¢£»Ç®¼ÐGPS¶¨Î»Ä£¿é¿ªÊ¼Æô¶¯²¢½øÐÐÇ®¼Ð¶¨Î»£¬ÈËÁ³Í¼Ïñ²É¼¯µ¥Ôª¿ªÊ¼²É¼¯ÍµµÁÕßµÄÈËÁ³Í¼Ïñ£»GPS¶¨Î»Ä£¿é½«¶¨Î»ÐÅÏ¢¾­Î¢´¦ÀíÆ÷´¦ÀíºóÍ¨¹ý¶ÌÐÅÍ¨Ñ¶Ä£¿é·¢ËÍÖÁÄ¿±êÊÖ»ú£¬Ç®¼ÐÖ÷ÈËÍ¨¹ý¶¨Î»ÐÅÏ¢ÕÒµ½Ç®¼Ð£¬Í¬Ê±ÈËÁ³Í¼Ïñ²É¼¯µ¥Ôª½«²É¼¯µ½µÄÈËÁ³ÐÅÏ¢Ò»·½Ãæ½«ÈËÁ³ÐÅÏ¢ÒÔ²ÊÐÅµÄ·½Ê½·¢ËÍÖÁÄ¿±êÊÖ»ú£¬ÁíÒ»·½Ãæ£¬½«ÈËÁ³ÐÅÏ¢·¢ËÍÖÁÏà¹Ø·…	°²È«
Ò»ÖÖ¶à¹¦ÄÜ·ÀµÁÇ®¼Ð	±±º£ÊÐÔÌÐ¾µç×Ó¿Æ¼¼ÓÐÏÞ¹«Ë¾	2016-08-19	2017-01-04	CN106263350A	Ö÷·ÖÀàºÅ£ºA45C1/06(2006.01)I	ÓÐÐ§-ÊµÖÊÉó²éµÄÉúÐ§	536000 ¹ãÎ÷×³×å×ÔÖÎÇø±±º£ÊÐ¹¤ÒµÔ°ÇøÖÐ¹úµç×Ó²úÒµÔ°A01¶°Èý²ãÎ÷08AÊÒ£¨±±º£ÊÐÌ¨ÍåÂ·ÒÔ±±¡¢±±º£´óµÀÒÔÎ÷£©	±¾·¢Ã÷¹«¿ªÁËÒ»ÖÖ¶à¹¦ÄÜ·ÀµÁÇ®¼Ð£¬Ö÷Òª°üÀ¨£ºÎ¢´¦ÀíÆ÷Í¨¹ý¿ØÖÆÖ¸ÎÆÊ¶±ðÄ£¿é£¬½ø¶ø¿ØÖÆµç×ÓËøµÄ¿ª¹ØËø×´Ì¬£¬¶ÌÐÅÍ¨Ñ¶Ä£¿éÍ¬Ê±½ÓÊÕÀ´×ÔÄ¿±êÊÖ»úµÄÖ¸ÁîÇëÇó£¬²¢½«Ö¸ÁîÐÅºÅ¾­Î¢´¦ÀíÆ÷´¦Àíºó£¬¿ØÖÆGPS¶¨Î»Ä£¿éµÄ¿ªÆôÓë¹Ø¶Ï×´Ì¬£¬GPS¶¨Î»Ä£¿é½«¶¨Î»ÐÅÏ¢Í¨¹ý¶ÌÐÅÄ£¿é·¢ËÍÖÁÄ¿±êÊÖ»ú£¬Í¬Ê±ËùÊöÖ¸ÎÆÊ¶±ðÄ£¿éÖ¸ÎÆÊ¶±ð´íÎóÀÛ¼ÆÈý´ÎÒÔÉÏÖ®ºó£¬Í¨¹ýÎ¢´¦ÀíÆ÷¿ØÖÆÈËÁ³Í¼Ïñ²É¼¯µ¥Ôª½øÐÐÈËÁ³Í¼Ïñ²É¼¯£¬ÈËÁ³²É¼¯Êý¾Ý¾­Î¢´¦ÀíÆ÷´¦Àíºó£¬Í¨¹ý¶ÌÐÅÍ¨Ñ¶Ä…	°²È«
Ò»ÖÖ·ÀµÁÇ®¼Ð	±±º£ÊÐÔÌÐ¾µç×Ó¿Æ¼¼ÓÐÏÞ¹«Ë¾	2016-08-19	2016-11-23	CN106136509A	Ö÷·ÖÀàºÅ£ºA45C1/02(2006.01)I	ÓÐÐ§-ÊµÖÊÉó²éµÄÉúÐ§	536000 ¹ãÎ÷×³×å×ÔÖÎÇø±±º£ÊÐ¹¤ÒµÔ°ÇøÖÐ¹úµç×Ó²úÒµÔ°A01¶°Èý²ãÎ÷08AÊÒ£¨±±º£ÊÐÌ¨ÍåÂ·ÒÔ±±¡¢±±º£´óµÀÒÔÎ÷£©	±¾·¢Ã÷¹«¿ªÁË·ÀµÁÇ®¼Ð£¬ÓÉÓÚÖ÷Òª°üÀ¨£ºÖ¸ÎÆÊ¶±ðÄ£¿é¡¢µç×ÓËøÄ£¿é¡¢GPS¶¨Î»Ä£¿éºÍ¶ÌÐÅÍ¨Ñ¶Ä£¿é·Ö±ðÓëÎ¢´¦ÀíÆ÷Á¬½Ó£¬Î¢´¦ÀíÆ÷Í¨¹ý¿ØÖÆÖ¸ÎÆÊ¶±ðÄ£¿é£¬½ø¶ø¿ØÖÆµç×ÓËøµÄ¿ª¹ØËø×´Ì¬£¬¶ÌÐÅÍ¨Ñ¶Ä£¿éÍ¬Ê±½ÓÊÕÀ´×Ô¿Í»§¶ËµÄÖ¸ÁîÇëÇó£¬²¢½«Ö¸ÁîÐÅºÅ¾­Î¢´¦ÀíÆ÷´¦Àíºó£¬¿ØÖÆGPS¶¨Î»Ä£¿éµÄ¿ªÆôÓë¹Ø¶Ï×´Ì¬£¬GPS¶¨Î»Ä£¿é½«¶¨Î»ÐÅÏ¢Í¨¹ý¶ÌÐÅÄ£¿é·¢ËÍÖÁÄ¿±ê¿Í»§¶Ë£»´Ó¶ø¿ÉÒÔ¿Ë·þÏÖÓÐ¼¼ÊõÖÐÊ§Ö÷ÎÞ·¨¶Ô¶ªÊ§ÎïÆ·½øÐÐ¸ú×Ù¡£	°²È«
Ò»ÖÖ»ùÓÚ°²È«Ó²¼þ¸ôÀëµÄÒÆ¶¯ÖÇÄÜÖÕ¶ËÖ§¸¶ÏµÍ³¼°·½·¨	ÖÐ¹ú¿ÆÑ§ÔºÐÅÏ¢¹¤³ÌÑÐ¾¿Ëù	2016-08-22	2017-01-11	CN106327184A	Ö÷·ÖÀàºÅ£ºG06Q20/32(2012.01)I	ÔÚÉó-×¨ÀûÉêÇëÈ¨¡¢×¨ÀûÈ¨µÄ×ªÒÆ	100093 ±±¾©ÊÐº£µíÇøãÉ×¯Â·¼×89ºÅ	±¾·¢Ã÷Éæ¼°Ò»ÖÖ»ùÓÚ°²È«Ó²¼þ¸ôÀëµÄÒÆ¶¯ÖÇÄÜÖÕ¶ËÖ§¸¶ÏµÍ³¼°·½·¨£¬°üÀ¨£ºÖ§¸¶·þÎñÆ÷¡¢ÒÆ¶¯ÖÇÄÜÖÕ¶Ë¡¢°²È«Ó²¼þ£»°²È«Ó²¼þ¶ÀÁ¢ÓÚÒÆ¶¯ÖÇÄÜÖÕ¶Ë£¬¾ßÓÐµ¥¶ÀµÄÏµÍ³¼´¶ÀÁ¢ÔËÐÐ»·¾³£¬±£»¤ÓÃ»§µÄÈÏÖ¤Êý¾Ý°²È«£¬²¢¶ÔÍâÌá¹©Ëæ»úÊýÉú³É£¬Ö¤ÊéÇëÇó£¬ÐÅÏ¢Ç©Ãû·þÎñ£»Í¬Ê±¾ßÓÐ°²È«´æ´¢¹¦ÄÜ£¬ÄÜ¹»±£»¤Ô¤ÖÃµÄÓÃ»§ÈÏÖ¤ÐÅÏ¢£»ÔÚÖ§¸¶ÏµÍ³Ö§¸¶¹ý³ÌÖÐ£¬°²È«Ó²¼þÐèÒªÓÃ»§ÊäÈëÖ§¸¶ÃÜÂë½øÐÐÑéÖ¤£¬ÔÚÑéÖ¤Í¨¹ýºóÀûÓÃÓÃ»§Ö§¸¶¹«Ô¿Ö¤ÊéË½Ô¿¶ÔÖ§¸¶Êý¾ÝÇ©Ãû¼ÓÃÜºó·µ»…	°²È«
Ò»ÖÖÏµÍ³½âËø·½·¨ºÍÉè±¸	ÓîÁú¼ÆËã»úÍ¨ÐÅ¿Æ¼¼£¨ÉîÛÚ£©ÓÐÏÞ¹«Ë¾	2016-08-24	2017-01-11	CN106327193A	Ö÷·ÖÀàºÅ£ºG06Q20/38(2012.01)I	ÔÚÉó-ÊµÖÊÉó²éµÄÉúÐ§	518057 ¹ã¶«Ê¡ÉîÛÚÊÐÄÏÉ½Çø¸ßÐÂ¼¼Êõ²úÒµÔ°(±±Çø)ÃÎÏªµÀ2ºÅ	±¾·¢Ã÷ÊµÊ©Àý¹«¿ªÁËÒ»ÖÖÏµÍ³½âËø·½·¨ºÍÉè±¸£¬¸Ã·½·¨°üÀ¨£ºÖÕ¶ËÉè±¸ÔÚÏµÍ³Ëø¶¨×´Ì¬ÏÂ½ÓÊÕÈÏÖ¤ÐÅÏ¢£»ËùÊöÖÕ¶ËÉè±¸Ê¹ÓÃÔ¤ÖÃµÄÏµÍ³½âËøÈÏÖ¤ÐÅÏ¢¶ÔËùÊöÈÏÖ¤ÐÅÏ¢½øÐÐÈÏÖ¤£¬ÈôÈÏÖ¤Ê§°Ü£¬ÔòÖØÐÂ½ÓÊÕÈÏÖ¤ÐÅÏ¢£¬²¢Ê¹ÓÃËùÊöÔ¤ÖÃµÄÏµÍ³½âËøÈÏÖ¤ÐÅÏ¢¶ÔÖØÐÂ½ÓÊÕµÄÈÏÖ¤ÐÅÏ¢½øÐÐÈÏÖ¤£¬Ö±µ½ÈÏÖ¤Í¨¹ý£»ËùÊöÖÕ¶ËÉè±¸Í³¼ÆÈÏÖ¤Ê§°Ü´ÎÊý£¬ÈôËùÊöÈÏÖ¤Ê§°Ü´ÎÊýÐ¡ÓÚµÈÓÚµÚÒ»ãÐÖµÔò½øÈëµÚÒ»ÏµÍ³£¬ÈôËùÊöÈÏÖ¤Ê§°Ü´ÎÊý´óÓÚµÚ¶þãÐÖµÔò½øÈëµÚ¶þÏµÍ³£»ËùÊöµÚ¶þÏµÍ…	°²È«
Ò»ÖÖ·ÖÀëÊ½Ö¸ÎÆÊ¶±ðµÄSTM»ú	¹ãÖÝÓùÒø×Ô¶¯¹ñÔ±»ú¿Æ¼¼ÓÐÏÞ¹«Ë¾	2016-08-25	2016-11-16	CN106127976A	Ö÷·ÖÀàºÅ£ºG07F19/00(2006.01)I	ÔÚÉó-ÊµÖÊÉó²éµÄÉúÐ§	510530 ¹ã¶«Ê¡¹ãÖÝÊÐÂÜ¸ÚÇøÈð·¢Â·12ºÅ×Ô±àµÚÒ»¶°µÚ¶þ²ã	±¾·¢Ã÷¹«¿ªÁËÒ»ÖÖ·ÖÀëÊ½Ö¸ÎÆÊ¶±ðµÄSTM»ú£¬°üÀ¨Ö÷»ú£¬ºÍÓëÖ÷»ú·ÖÀëÉèÖÃµÄ±ãÐ¯Ê½Ö¸ÎÆÊ¶±ð×°ÖÃ£º±ãÐ¯Ê½Ö¸ÎÆÊ¶±ð×°ÖÃ£¬ÓÃÓÚ½ÓÊÕÖ÷¿ØÖÆÆ÷·¢ËÍµÄÃØÔ¿£¬È»ºó¸ù¾ÝÃØÔ¿¶ÔÉ¨ÃèµÃµ½µÄÖ¸ÎÆÍ¼Æ×½øÐÐ¼ÓÃÜ£¬Í¨¹ýÃÜÎÄ½«Í¼Æ×·¢ËÍµ½Êý¾Ý¿â¡£ÆäÓÅµãÔÚÓÚ£¬±ãÐ¯Ê½Ö¸ÎÆÊ¶±ð×°ÖÃ¿ÉÒÔ±»ÐÐ¶¯ÓÐÕÏ°­µÄÓÃ»§ÄÃÔÚÊÖÀï¡£È»ºó½øÐÐÖ¸ÎÆÍ¼Æ×É¨Ãè£¬Í¨¹ýÖ÷»úµÄËæ»úÃÜÎÄÍê³É¼ÓÃÜ¡£×îºóÍ¨¹ýÊÕ·¢µ¥Ôª´«Êäµ½Ö÷»ú½øÐÐÉí·ÝÑéÖ¤¡£Õû¸ö¹ý³Ì¶¼²»ÐèÒªÓÃ»§ÒÆ¶¯ÊÖÍóÒÔÉÏµÄ²¿Î»¼´¿É…	°²È«
Ò»ÖÖ±£´æ·½·¨ºÍÇåËãÏµÍ³	Áª¶¯ÓÅÊÆ¿Æ¼¼ÓÐÏÞ¹«Ë¾	2016-08-25	2017-01-11	CN106326771A	Ö÷·ÖÀàºÅ£ºG06F21/62(2013.01)I	ÔÚÉó-ÊµÖÊÉó²éµÄÉúÐ§	100120 ±±¾©ÊÐº£µíÇøÑ§ÔºÄÏÂ·12ºÅÑ§´´´óÏÃA×ù7²ã	±¾·¢Ã÷ÊµÊ©ÀýÌá¹©Ò»ÖÖ±£´æ·½·¨ºÍÇåËãÏµÍ³£¬ÓÃÓÚ½â¾öÔÚÊ¹ÓÃÇåËãÏµÍ³Ê±´æÔÚÐÅÏ¢µÄ°²È«ÐÔ½ÏµÍµÄ¼¼ÊõÎÊÌâ¡£¸Ã±£´æ·½·¨°üÀ¨£º»ñÈ¡ÊäÈëÐÅÏ¢£¬ÊäÈëÐÅÏ¢°üÀ¨½è¿îÈËÍ¨¹ýÓë·þÎñÆ÷ÏàÁ¬µÄµÚÒ»ÖÕ¶ËÊäÈëµÄ½è¿îÐÅÏ¢ºÍÍ¶×ÊÈËÍ¨¹ýÓë·þÎñÆ÷ÏàÁ¬µÄµÚ¶þÖÕ¶ËÊäÈëµÄÍ¶×ÊÐÅÏ¢£»»ùÓÚÊäÈëÐÅÏ¢Éú³ÉÒ»ºÏÔ¼Çåµ¥£¬ºÏÔ¼Çåµ¥°üÀ¨ÖÁÉÙÒ»¸öÇåËãÌõ¿î£¬ÇåËãÌõ¿îÓÃÓÚÖ¸Ê¾½è¿îÈËÓëÍ¶×ÊÈËÖ®¼äµÄ½»Ò×¹æÔò£»½«ºÏÔ¼Çåµ¥·¢ËÍµ½ÓëÇåËãÏµÍ³ÏàÁ¬µÄ·Ö²¼Ê½ÕË±¾£»ÆäÖÐ£¬·Ö²¼Ê½ÕË±¾Ó…	°²È«
Ò»ÖÖÉí·ÝÑéÖ¤·½·¨¼°ÒÆ¶¯ÖÕ¶Ë	Î¬ÎÖÒÆ¶¯Í¨ÐÅÓÐÏÞ¹«Ë¾	2016-08-26	2017-01-18	CN106339620A	Ö÷·ÖÀàºÅ£ºG06F21/32(2013.01)I	ÔÚÉó-ÊµÖÊÉó²éµÄÉúÐ§	523860 ¹ã¶«Ê¡¶«Ý¸ÊÐ³¤°²ÕòÎÚÉ³²½²½¸ß´óµÀ283ºÅ	±¾·¢Ã÷Ìá¹©ÁËÒ»ÖÖÉí·ÝÑéÖ¤·½·¨¼°ÒÆ¶¯ÖÕ¶Ë£¬¸ÃÉí·ÝÑéÖ¤·½·¨°üÀ¨£º¶Ôµ±Ç°ÓÃ»§½øÐÐÑÛÇòÎÆÀí¼ì²âÒÔ¼°Õ£ÑÛÐÐÎª¼ì²â£»µ±¶Ôµ±Ç°ÓÃ»§½øÐÐÑÛÇòÎÆÀí¼ì²âÒÔ¼°Õ£ÑÛÐÐÎª¼ì²â¾ùÍ¨¹ýÊ±£¬È·ÈÏµ±Ç°ÓÃ»§µÄÉí·ÝÑéÖ¤Í¨¹ý¡£±¾·¢Ã÷ÔÚ¶ÔÓÃ»§½øÐÐÉí·ÝÑéÖ¤µÄ¹ý³ÌÖÐ£¬Í¨¹ý½øÐÐÕ£ÑÛÐÐÎª¼ì²âÓëÑÛÇòÎÆÀí¼ì²â£¬ÒÔÌá¸ßÉí·ÝÑéÖ¤µÄ°²È«ÐÔ£»ÌØ±ðÊÇÔÚµç×ÓÉè±¸µÄÖ§¸¶¹ý³ÌÖÐ£¬¿ÉÓÐÐ§µØ±£»¤ÓÃ»§µÄ²Æ²ú°²È«£»±¾·¢Ã÷½â¾öÁËÑÛÇòÎÆÀíÊ¶±ð¿ÉÄÜ»á´æÔÚÎóÊ¶±ðµÄÇé¿öµÄÎÊÌâ¡£	°²È«
Ò»ÖÖ¿ì½ÝÆô¶¯Ö§¸¶½çÃæ·½·¨¼°ÒÆ¶¯ÖÕ¶Ë	Î¬ÎÖÒÆ¶¯Í¨ÐÅÓÐÏÞ¹«Ë¾	2016-08-26	2017-01-11	CN106326710A	Ö÷·ÖÀàºÅ£ºG06F21/32(2013.01)I	ÔÚÉó-ÊµÖÊÉó²éµÄÉúÐ§	523860 ¹ã¶«Ê¡¶«Ý¸ÊÐ³¤°²ÕòÎÚÉ³²½²½¸ß´óµÀ283ºÅ	±¾·¢Ã÷Ìá¹©ÁËÒ»ÖÖ¿ì½ÝÆô¶¯Ö§¸¶½çÃæµÄ·½·¨¼°ÒÆ¶¯ÖÕ¶Ë£¬ÆäÖÐ£¬ËùÊö·½·¨°üÀ¨£º¼ì²âÓÃ»§¶ÔÖ¸ÎÆÊ¶±ðÆ÷µÄ´¥¿Ø²Ù×÷£¬»ñÈ¡ÓÃ»§µÄÖ¸ÎÆ£»ÈôËùÊö´¥¿Ø²Ù×÷·ûºÏµÚÒ»Ô¤ÉèÌõ¼þ£¬ÇÒËùÊöÖ¸ÎÆÑéÖ¤Í¨¹ý£¬ÔòÆô¶¯ËùÊöÖ¸ÎÆ¶ÔÓ¦µÄÖ§¸¶·½Ê½µÄÖ§¸¶½çÃæ£¬ËùÊöÖ§¸¶½çÃæ°üÀ¨Ö§¸¶Ê¶±ð¶ÔÏó£»µ±½ÓÊÕÓÃ»§ÊäÈëµÄÖ§¸¶Ê¶±ð¶ÔÏóµÄÇÐ»»Ö¸Áî£¬ÇÐ»»ËùÊöÖ§¸¶Ê¶±ð¶ÔÏó¡£´Ó¶ø¿ÉÒÔ½â¾öÕë¶Ô²»Í¬ÉÌ¼ÒÌá¹©µÄÖ§¸¶Éè±¸ÒÔ¼°ÓÃ»§µÄ¸öÈËÏ²ºÃ£¬ÔÚÖ§¸¶Ê±Ñ°ÕÒÖ§¸¶Ó¦ÓÃ£¬´ò¿ªÏàÓ¦µÄÖ§¸¶½çÃ…	Ö§¸¶
POS»ú´¥ÃþÏÔÊ¾ÆÁµÄÃÜÂë°²È«ÊäÈë·½·¨¼°×°ÖÃ	¸£½¨ÁªµÏÉÌÓÃÉè±¸ÓÐÏÞ¹«Ë¾	2016-08-26	2017-01-11	CN106326700A	Ö÷·ÖÀàºÅ£ºG06F21/31(2013.01)I	ÔÚÉó-ÊµÖÊÉó²éµÄÉúÐ§	350000 ¸£½¨Ê¡¸£ÖÝÊÐ¹ÄÂ¥ÇøÈí¼þ´óµÀ89ºÅ¸£ÖÝÈí¼þÔ°Ò»Çø23ºÅÂ¥	±¾·¢Ã÷¹«¿ªÒ»ÖÖPOS»ú´¥ÃþÏÔÊ¾ÆÁµÄÃÜÂë°²È«ÊäÈë·½·¨¼°×°ÖÃ£¬ËùÊöPOS»ú´¥ÃþÏÔÊ¾ÆÁµÄÃÜÂë°²È«ÊäÈë·½·¨°üÀ¨ÒÔÏÂ²½Öè£º¼ì²âÓëËùÊö´¥ÃþÏÔÊ¾ÆÁµÄ½Ó´¥£»¸ù¾ÝËùÊö½Ó´¥»ñÈ¡½Ó´¥µãµÄ×ø±êÐÅÏ¢£¬¸ù¾ÝËùÊö½Ó´¥µãµÄ×ø±ê½âÎö³ö°´¼üÖµ¡¢½«ËùÊö°´¼üÖµ±£´æ£¬²¢ÏòËùÊö´¥ÃþÏÔÊ¾ÆÁ·¢ËÍÏÔÊ¾ÊÂ¼þ£»ÔÚËùÊö´¥ÃþÏÔÊ¾ÆÁÉÏÏÔÊ¾ÓëËùÊöÏÔÊ¾ÊÂ¼þ¸öÊýÏàÍ¬¸öÊýµÄ·ÇÃÜÂë×Ô¶¨Òå×Ö·û£»¶ÔËùÊö°´¼üÖµ½øÐÐ¼ÓÃÜ£¬²¢ÏòËùÊö´¥ÃþÏÔÊ¾ÆÁ·¢ËÍ½áÊøÊÂ¼þ¡£Í¨¹ý±¾·¢Ã÷£¬ÊµÏÖÁË´¥ÃþÏÔÊ…	°²È«
Ò»ÖÖ±ãÐ¯Ê½Ö¸ÎÆÊ¶±ð×°ÖÃ	¹ãÖÝÓùÒø¿Æ¼¼¹É·ÝÓÐÏÞ¹«Ë¾	2016-08-29	2017-02-01	CN106372585A	Ö÷·ÖÀàºÅ£ºG06K9/00(2006.01)I	ÔÚÉó-ÊµÖÊÉó²éµÄÉúÐ§	510530 ¹ã¶«Ê¡¹ãÖÝÊÐÌìºÓÇøÎåÉ½Â·246¡¢248¡¢250ºÅ2602·¿×Ô±à04¡¢05	±¾·¢Ã÷¹«¿ªÁËÒ»ÖÖ±ãÐ¯Ê½Ö¸ÎÆÊ¶±ð×°ÖÃ£¬ÓÃÓÚ½ÓÊÕÖ÷»ú·¢ËÍµÄÃØÔ¿£¬È»ºó¸ù¾ÝÃØÔ¿¶ÔÉ¨ÃèµÃµ½µÄÖ¸ÎÆÍ¼Æ×½øÐÐ¼ÓÃÜ£¬Í¨¹ýÃÜÎÄ½«Í¼Æ×·¢ËÍµ½Ö÷»ú£»°üÀ¨£ºÉ¨Ãèµ¥Ôª£¬ÓÃÓÚÉ¨ÃèÓÃ»§µÄÖ¸ÎÆÍ¼Æ×£»ÊÕ·¢µ¥Ôª£¬ÓÃÓÚ½ÓÊÕËæ»úÃØÔ¿£»·¢ËÍ¼ÓÃÜºóµÄÍ¼Æ×£»¼ÓÃÜµ¥Ôª£¬¸ù¾ÝÃØÔ¿¶ÔÍ¼Æ×½øÐÐ¼ÓÃÜ¡£ÆäÓÅµãÔÚÓÚ£¬±ãÐ¯Ê½Ö¸ÎÆÊ¶±ð×°ÖÃ¿ÉÒÔ±»ÐÐ¶¯ÓÐÕÏ°­µÄÓÃ»§ÄÃÔÚÊÖÀï¡£È»ºó½øÐÐÖ¸ÎÆÍ¼Æ×É¨Ãè£¬Í¨¹ýÖ÷»úµÄËæ»úÃÜÎÄÍê³É¼ÓÃÜ¡£×îºóÍ¨¹ýÊÕ·¢µ¥Ôª´«Êäµ½Ö÷»ú½øÐÐÉí·ÝÑéÖ¤¡…	°²È«
Ìá¹©½ðÈÚ·þÎñÓ¦ÓÃµÄ·½·¨	ÖÐ¹úÒøÁª¹É·ÝÓÐÏÞ¹«Ë¾	2016-08-29	2020-04-28	CN111083220A	Ö÷·ÖÀàºÅ£ºH04L29/08(20060101)	ÔÚÉó-¹«¿ª	200135 ÉÏº£ÊÐÆÖ¶«ÐÂÇøº¬Ð¦Â·36ºÅÒøÁª´óÏÃ	±¾·¢Ã÷Éæ¼°Ò»ÖÖ»ùÓÚÒÔÌ«·»Çø¿éÁ´¼¼ÊõµÄ½ðÈÚ·þÎñÓ¦ÓÃÏµÍ³£¬°üÀ¨£ºÓÃ»§×¢²áÄ£¿é£¬¹©ÓÃ»§ÏòÏµÍ³½øÐÐ×¢²á£¬×¢²á³É¹¦ºóÓÃ»§×¢²áÄ£¿éÏò¸÷ÓÃ»§·Ö±ðÏÂ·¢ÒµÎñºÅÒÔ¼°ÒµÎñÃÜÔ¿£»Éí·ÝÑéÖ¤Ä£¿é£¬ÓÃÓÚ¶ÔÐèÒª½ðÈÚ·þÎñµÄÓÃ»§½øÐÐÉí·ÝÑéÖ¤£¬Éí·ÝÑéÖ¤ÖÁÉÙ»ùÓÚÒµÎñºÅÓëÒµÎñÃÜÔ¿À´½øÐÐ£»ÒµÎñÄ£¿é£¬ÓëÓÃ»§½øÐÐÒµÎñ½»»¥£¬ÒµÎñ½»»¥ÓÉÖÁÉÙÒ»ÏîÒµÎñ·þÎñÀ´¾ßÌå»¯£¬ÆäÖÐ¸÷ÏîÒµÎñ·þÎñ·Ö±ðÒÔÎ¨Ò»×ÊÔ´±êÊ¶·ûÀ´±êÊ¶£»ÒÔ¼°·þÎñµ÷ÓÃÄ£¿é£¬ÓëÒµÎñÄ£¿éñîºÏ£¬ÓÃÓÚÎª¸÷Ï…	°²È«
½ðÈÚ°²·À×ÛºÏ¹Ü¿ØÆ½Ì¨	ËÄ´¨Ì©¶û¿Æ¼¼ÓÐÏÞ¹«Ë¾	2016-08-30	2017-02-08	CN106385431A	Ö÷·ÖÀàºÅ£ºH04L29/08(2006.01)I	ÔÚÉó-ÊµÖÊÉó²éµÄÉúÐ§	610000 ËÄ´¨Ê¡³É¶¼ÊÐÎäºîÇøÈËÃñÄÏÂ·Èý¶Î17ºÅ»ªÎ÷ÃÀÂ®B¶°5Â¥KÐÍ	½ðÈÚ°²·À×ÛºÏ¹Ü¿ØÆ½Ì¨£¬°üÀ¨Ç°¶Ë±¤ÀÝ»úºÍºóÌ¨±¤ÀÝ»ú£¬ËùÊöÇ°¶Ë±¤ÀÝ»úÁ¬½ÓÈô¸ÉÇ°¶Ë½»»»»ú£¬Ã¿Ò»Ç°¶Ë½»»»»úÁ¬½ÓÓÐÒ»¼à¿ØÉè±¸ºÍÒ»Ó¦ÓÃÄ£¿é£¬ËùÊöºóÌ¨±¤ÀÝ»úÓëÇ°¶Ë±¤ÀÝ»úÖ®¼äÁ¬½ÓÓÐºËÐÄ½»»»»ú£¬ËùÊöÇ°¶Ë±¤ÀÝ»úÍ¨¹ýÊý¾Ý×ÜÏßÓë¸÷¸öÇ°¶Ë×ÓÏµÍ³Á¬½Ó£¬ËùÊöÇ°¶Ë×ÓÏµÍ³°üÀ¨·þÎñÆ÷¼¯Èº¡¢½ðÈÚ·þÎñÏµÍ³ºÍµçÊÓÇ½¼à¿Ø·þÎñÏµÍ³¡£±¾·¢Ã÷³ä·ÖÀûÓÃÏÖÓÐµÄ°²·À×ÊÔ´£¬ÄÜ½«ÒÑ½¨µÄ·ÖÉ¢¡¢¹ÂÁ¢µÄÏµÍ³Éè±¸ÕûºÏ¼¯³É½ÓÈëµ½Æ½Ì¨ÉÏ½øÐÐ¼¯ÖÐ¹ÜÀíÓë¿ØÖÆ²Ù×÷£¬³¹µ×¸Ä±…	°²È«
´Ù½øÒøÐÐÒµÎñÁ¿µÄ½»»¥×°ÖÃ	¶­ÑÒÑÒ	2016-08-31	2017-02-15	CN106407778A	Ö÷·ÖÀàºÅ£ºG06F21/32(2013.01)I	Ê§Ð§-·¢Ã÷×¨ÀûÉêÇë¹«²¼ºóµÄ³·»Ø	053000 ºÓ±±Ê¡ºâË®ÊÐ±±Íâ»·1994ºÅ	±¾·¢Ã÷Éæ¼°Ò»ÖÖ´Ù½øÒøÐÐÒµÎñÁ¿µÄ½»»¥×°ÖÃ£¬°üÀ¨¸ßÇåÉãÏñÍ·¡¢ÒøÐÐ·ÃÎÊÖÕ¶Ë¡¢Í¼ÏñÊÚÈ¨Éè±¸ºÍAVR32Ð¾Æ¬£¬¸ßÇåÉãÏñÍ·ÓëÍ¼ÏñÊÚÈ¨Éè±¸Á¬½Ó£¬AVR32Ð¾Æ¬·Ö±ðÓëÍ¼ÏñÊÚÈ¨Éè±¸ºÍÒøÐÐ·ÃÎÊÖÕ¶ËÁ¬½Ó£¬ÓÃÓÚ»ùÓÚÍ¼ÏñÊÚÈ¨Éè±¸µÄÊä³öÈ·¶¨ÒøÐÐ·ÃÎÊÖÕ¶ËÇ°·½µÄÒøÐÐÓÃ»§ÊÇ·ñÓÐÈ¨¶ÔÒøÐÐ·ÃÎÊÖÕ¶Ë½øÐÐ·ÃÎÊ¡£Í¨¹ý±¾·¢Ã÷£¬ÄÜ¹»¿ìËÙ°ïÖúÒøÐÐÓÃ»§Íê³ÉÒµÎñÊÚÈ¨£¬´Ó¶ø´Ù½øÒøÐÐÒµÎñÁ¿¡£	Êý¾Ý·ÖÎö
¼à¿Ø·½·¨¡¢×°ÖÃ¼°µç×ÓÉè±¸	ÉîÛÚÇ°º£´ïãËÔÆ¶ËÖÇÄÜ¿Æ¼¼ÓÐÏÞ¹«Ë¾	2016-08-31	2017-05-24	CN106716429A	Ö÷·ÖÀàºÅ£ºG06F21/31(2013.01)I	ÔÚÉó-ÊµÖÊÉó²éµÄÉúÐ§	100102 ±±¾©ÊÐ³¯ÑôÇøÍû¾©½Ö10ºÅÍû¾©sohoËþ3A×ù23²ã	±¾¹«¿ªÊÇ¹ØÓÚÒ»ÖÖ¼à¿Ø·½·¨¡¢×°ÖÃ¼°µç×ÓÉè±¸¡£·½·¨°üÀ¨£ºÔÚÓÃ»§ÎÞ¸ÐÖªµÄÇé¿öÏÂ»ñÈ¡ÓÃ»§ÌØÕ÷ÐÅÏ¢£»ÔÚ¸ù¾ÝÓÃ»§ÊäÈëµÄÉí·ÝÈÏÖ¤ÐÅÏ¢ÅÐ¶ÏÓÃ»§ºÏ·¨Ê±£¬¸ù¾ÝËùÊöÓÃ»§ÌØÕ÷ÐÅÏ¢È·ÈÏËùÊöµ±Ç°ÓÃ»§ÊÇ·ñÎª·Ç·¨ÓÃ»§£¬ËùÊöÉí·ÝÈÏÖ¤ÐÅÏ¢ÓÃÓÚÈ·ÈÏÄ¿±êÈÏÖ¤²Ù×÷ÊÇ·ñ±»ÔÊÐí£»ÔÚ¸ù¾ÝËùÊöÓÃ»§ÌØÕ÷ÐÅÏ¢È·ÈÏËùÊöµ±Ç°ÓÃ»§Îª·Ç·¨ÓÃ»§Ê±£¬Ö´ÐÐÖ¸¶¨µÄ°²È«²Ù×÷¡£ÓÉ´Ë£¬¼´±ãÊÇ·Ç·¨ÓÃ»§ÆÆ½â»òÎ±ÔìÁËºÏ·¨ÓÃ»§µÄÉí·ÝÈÏÖ¤ÐÅÏ¢¶ø³É¹¦½øÈë¸Ãµç×ÓÉè±¸£¬µç×ÓÉè±¸Ò²¿ÉÍ¨¹ý»…	°²È«
Ìá¸ßÖ§¸¶ÖÕ¶ËÓ¦ÓÃ°²È«ÐÔµÄ·½·¨¼°ÏµÍ³	¸£½¨ÁªµÏÉÌÓÃÉè±¸ÓÐÏÞ¹«Ë¾	2016-08-31	2017-02-01	CN106372496A	Ö÷·ÖÀàºÅ£ºG06F21/52(2013.01)I	ÔÚÉó-ÊµÖÊÉó²éµÄÉúÐ§	350000 ¸£½¨Ê¡¸£ÖÝÊÐ¹ÄÂ¥ÇøÈí¼þ´óµÀ89ºÅ¸£ÖÝÈí¼þÔ°Ò»Çø23ºÅÂ¥	±¾·¢Ã÷Ìá¹©Ìá¸ßÖ§¸¶ÖÕ¶ËÓ¦ÓÃ°²È«ÐÔµÄ·½·¨¼°Æä×°ÖÃ£¬·½·¨°üÀ¨Ô¤ÉèÓ¦ÓÃ³ÌÐòµÄÈ¨ÏÞ£¬Éú³É¶ÔÓ¦Ó¦ÓÃ³ÌÐòµÄÈ¨ÏÞ±í£»·¢²¼Õß¶ÔÓ¦ÓÃ³ÌÐò¼°ÆäÈ¨ÏÞ±í½øÐÐÊý×ÖÇ©Ãû£»ÖÕ¶ËÑéÖ¤Êý×ÖÇ©ÃûÍ¨¹ýºó£¬»ñÈ¡Ó¦ÓÃ³ÌÐò¼°ÆäÈ¨ÏÞ±í£¬²¢ÎªÓ¦ÓÃ³ÌÐò·ÖÅäÒ»±êÊ¶£»½¨Á¢Ó¦ÓÃ³ÌÐò¡¢±êÊ¶ºÍÈ¨ÏÞ±íµÄ¹ØÁª¹ØÏµ£»µ±Ó¦ÓÃ³ÌÐòµ÷ÓÃÉæ¼°Ö§¸¶²Ù×÷µÄ¹¦ÄÜÊ±£¬ÖÕ¶Ë»ñÈ¡Ó¦ÓÃ³ÌÐòµÄ±êÊ¶£»ÖÕ¶ËÒÀ¾Ý¹ØÁª¹ØÏµ£¬»ñÈ¡±êÊ¶¶ÔÓ¦µÄÈ¨ÏÞ±í£»ÖÕ¶ËÒÀ¾ÝÈ¨ÏÞ±íÈ·¶¨Ó¦ÓÃ³ÌÐòÊÇ·ñÓÐµ÷ÓÃËùÊö¹¦ÄÜµÄÈ…	°²È«
½ðÈÚ½è´û·çÏÕ¿ØÖÆÏµÍ³ÒÔ¼°ÔËÐÐ·½·¨	ÅíÃ·	2016-08-31	2017-11-28	CN107403370A	Ö÷·ÖÀàºÅ£ºG06Q40/02(2012.01)I	ÓÐÐ§-ÊÚÈ¨	061000 ºÓ±±Ê¡²×ÖÝÊÐ¾ÅºÓÎ÷Â·21ºÅ	±¾·¢Ã÷Éæ¼°Ò»ÖÖ½ðÈÚ½è´û·çÏÕ¿ØÖÆÏµÍ³£¬°üÀ¨½ðÈÚ½è´û¹ÜÀíÉè±¸¡¢È¨ÏÞ¿ØÖÆÉè±¸¡¢DSP´¦ÀíÐ¾Æ¬ºÍ¸ßÇåÉãÏñÍ·£¬È¨ÏÞ¿ØÖÆÉè±¸Óë½ðÈÚ½è´û¹ÜÀíÉè±¸Á¬½Ó£¬ÓÃÓÚ¶Ô½ðÈÚ½è´û¹ÜÀíÉè±¸½øÐÐ·ÃÎÊÈë¿Ú¿ªÆô¿ØÖÆ£¬DSP´¦ÀíÐ¾Æ¬·Ö±ðÓëÈ¨ÏÞ¿ØÖÆÉè±¸ºÍ¸ßÇåÉãÏñÍ·Á¬½Ó£¬ÓÃÓÚ»ùÓÚ¸ßÇåÉãÏñÍ·µÄÊä³öÈ·¶¨¶ÔÈ¨ÏÞ¿ØÖÆÉè±¸µÄ¿ØÖÆÄ£Ê½¡£±¾·¢Ã÷»¹Éæ¼°Ò»ÖÖ½ðÈÚ½è´û·çÏÕÔËÐÐ·½·¨¡£Í¨¹ý±¾·¢Ã÷£¬ÄÜ¹»¶Ô½ðÈÚ½è´û¹ÜÀíÉè±¸½øÐÐÓÐÐ§µÄ·çÏÕ¿ØÖÆ¡£	½è´û
Ò»ÖÖ×ÔÖúÕÕÆ¬´òÓ¡·½·¨¼°ÏµÍ³	ÉÏº£ì³Ñ¶Êý¾ÝÍ¨ÐÅ¼¼ÊõÓÐÏÞ¹«Ë¾	2016-09-08	2017-02-15	CN106408784A	Ö÷·ÖÀàºÅ£ºG07F17/26(2006.01)I	ÔÚÉó-ÊµÖÊÉó²éµÄÉúÐ§	201616 ÉÏº£ÊÐËÉ½­ÇøË¼ÏÍÂ·3666ºÅ	±¾·¢Ã÷¹«¿ªÁËÒ»ÖÖ×ÔÖúÕÕÆ¬´òÓ¡·½·¨¼°ÏµÍ³£¬°üÀ¨£º²½ÖèS10¼àÌýÊÇ·ñÓÐÓÃ»§µÄ´òÓ¡ÕÕÆ¬ÇëÇó£¬Èô·ñ£¬ÔòÖ´ÐÐ²½ÖèS10£»²½ÖèS20Èô¼àÌýµ½ÓÃ»§µÄ´òÓ¡ÕÕÆ¬ÇëÇóÊ±£¬Ôò¶Ôµ±Ç°ÓÃ»§½øÐÐÉí·ÝÈÏÖ¤£»²½ÖèS30Èôµ±Ç°ÓÃ»§µÄÉí·ÝÈÏÖ¤³É¹¦£¬¿ª·ÅÕÕÆ¬´òÓ¡È¨ÏÞ¸øµ±Ç°ÓÃ»§£»²½ÖèS40µ±½ÓÊÕµ½ÓÃ»§·¢ËÍµÄÐèÒª´òÓ¡µÄÕÕÆ¬Ê±£¬½«ËùÊöÕÕÆ¬·¢ËÍ¸ø×ÔÖúÍøÂç´òÓ¡»ú½øÐÐÕÕÆ¬´òÓ¡¡£±¾·¢Ã÷ÀûÓÃºçÄ¤ÌØÕ÷ÐÅÏ¢¶Ôµ±Ç°ÓÃ»§½øÐÐÉí·ÝÈÏÖ¤£¬Ö»ÓÐÉí·ÝÈÏÖ¤³É¹¦²Å¿ª·Å´òÓ¡È¨ÏÞ¸øÓÃ»§£¬…	°²È«
»ùÓÚÉí·ÝÈÏÖ¤µÄ°²È«ÏµÍ³¼°·½·¨	ÖÐ¹úÁªºÏÍøÂçÍ¨ÐÅ¼¯ÍÅÓÐÏÞ¹«Ë¾	2016-09-12	2017-02-08	CN106384037A	Ö÷·ÖÀàºÅ£ºG06F21/32(2013.01)I	ÔÚÉó-ÊµÖÊÉó²éµÄÉúÐ§	100033 ±±¾©ÊÐÎ÷³ÇÇø½ðÈÚ´ó½Ö21ºÅ	±¾·¢Ã÷Ìá¹©µÄ»ùÓÚÉí·ÝÈÏÖ¤µÄ°²È«ÏµÍ³¼°·½·¨£¬Æä°üÀ¨£ºÌØÕ÷ÌáÈ¡Ä£¿é½ÓÊÕÓÃ»§ÊäÈëµÄÖ¸ÎÆÍ¼Ïñ£»ÌØÕ÷ÈÏÖ¤Ä£¿éÊ¶±ð¸ÃÓÃ»§ÊÖÖ¸µÄºìÍâÏßÌØÕ÷±ê¼Ç£¬²¢½«ÌáÈ¡µÄ¸ÃÌØÕ÷ÂëÓë±ê×¼ÌØÕ÷Âë½øÐÐ±È¶Ô£»Éí·ÝÈÏÖ¤Ä£¿é½«´©¹ýÖ¸ÎÆÍ¼ÏñµÄ¹âÐÅºÅÔÚµÚÒ»¸Ð¹â²ÄÁÏÉÏÐÎ³ÉµÚÒ»»Ò¶ÈÍ¼ÐÎ£¬²¢¸ù¾Ý×ª»»Ëã·¨½øÐÐ×ª»»£¬ÔÚµÚ¶þ¸Ð¹â²ÄÁÏÉÏÐÎ³ÉµÚ¶þ»Ò¶ÈÍ¼ÐÎ£»Êý¾Ý½Ó¿Ú½«µÚ¶þ»Ò¶ÈÍ¼ÐÎ´«ÊäÖÁÈÏÖ¤Éè±¸£¬ÒÔ¸ù¾ÝÓë×ª»»Ëã·¨ÏàÆ¥ÅäµÄÄæ×ª»»Ëã·¨£¬½«µÚ¶þ»Ò¶ÈÍ¼ÐÎ»¹Ô­ÐÎ³ÉÖ¸ÎÆÍ¼Ï…	°²È«
Ò»ÖÖÖÕ¶ËµÄ±£»¤·½·¨¼°ÖÕ¶Ë	Öéº£¸ñÁ¦µçÆ÷¹É·ÝÓÐÏÞ¹«Ë¾	2016-09-12	2017-02-22	CN106446628A	Ö÷·ÖÀàºÅ£ºG06F21/31(2013.01)I	ÔÚÉó-ÊµÖÊÉó²éµÄÉúÐ§	519070 ¹ã¶«Ê¡Öéº£ÊÐÇ°É½½ð¼¦Î÷Â·	±¾·¢Ã÷¹«¿ªÁËÒ»ÖÖÖÕ¶ËµÄ±£»¤·½·¨¼°ÖÕ¶Ë£¬ÔÚÔ¤Éè½çÃæ½ÓÊÕÓÃ»§ÊäÈëµÄÃÜÂëÐÅÏ¢Ê±£¬¸ù¾Ý½ÓÊÕµ½µÄÃÜÂëÐÅÏ¢È·¶¨³ÖÓÐÖÕ¶ËµÄÓÃ»§µ±Ç°ÊÇ·ñ°²È«£¬ÔÚÈ·¶¨ÓÃ»§µ±Ç°°²È«ÊÜµ½ÍþÐ²Ê±Ö´ÐÐÏàÓ¦µÄ±£»¤²Ù×÷¡£ÕâÑù£¬µ±ÖîÈç³ÖÓÐÖÕ¶ËµÄÓÃ»§ÊÜµ½Ð®³Ö»òÍþÐ²Ê±±»ÆÈ²ÉÓÃÖÕ¶Ë½øÐÐÖ§¸¶µÄÇé¿öÏÂ£¬Í¨¹ýÔÚÔ¤Éè½çÃæ½ÓÊÕµ½µÄÓÃ»§ÊäÈëµÄÃÜÂëÐÅÏ¢£¬¿ÉÒÔÍ¨¹ýÒþ±ÎµÄ·½Ê½È·¶¨³ÖÓÐÖÕ¶ËµÄÓÃ»§µ±Ç°ÊÇ·ñ°²È«£¬²¢ÔÚÈ·¶¨µ±Ç°°²È«ÊÜµ½ÍþÐ²Ê±£¬Í¨¹ýÖ´ÐÐÏàÓ¦µÄ±£»¤²Ù×÷À´±£»¤ÓÃ»§²…	°²È«
»áÔ±·þÎñµÄÊÕ·Ñ·½·¨¡¢×°ÖÃ¼°ÏµÍ³	³É¶¼Éí±ß¿Æ¼¼ÓÐÏÞ¹«Ë¾	2016-09-13	2017-02-15	CN106408300A	Ö÷·ÖÀàºÅ£ºG06Q20/38(2012.01)I	ÔÚÉó-ÊµÖÊÉó²éµÄÉúÐ§	610007 ËÄ´¨Ê¡³É¶¼ÊÐ¸ßÐÂÇøÒæÖÝ´óµÀ±±¶Î388ºÅ8¶°13²ã1323ºÅ	±¾·¢Ã÷ÊµÊ©ÀýÌá¹©»áÔ±·þÎñµÄÊÕ·Ñ·½·¨¡¢×°ÖÃ¼°ÏµÍ³¡£ÔÚÒ»¸öÊµÀýÖÐ£¬ËùÊö·½·¨°üÀ¨£ºËùÊö·þÎñÆ÷¸ù¾ÝÓÃ»§ÖÕ¶ËµÄÕËºÅ×¢²áÇëÇó£¬ÎªËùÊöÓÃ»§ÖÕ¶Ë½¨Á¢Ò»¸öÖ§¸¶ÕË»§£»ËùÊöÓÃ»§ÖÕ¶ËÍ¨¹ýÓÃ»§ÕËºÅµÇÈëËùÊö·þÎñÆ÷£»ËùÊöÓÃ»§ÖÕ¶Ë½ÓÊÕÓÃ»§Ñ¡ÔñËùÐè¹ºÂòµÄ»áÔ±·þÎñÑ¡Ïî£¬²¢¸ù¾ÝÓÃ»§µÄÑ¡ÔñÏòËùÊö·þÎñÆ÷·¢ËÍ¹ºÂòÇëÇó£»ËùÊö·þÎñÆ÷½ÓÊÕµ½ËùÊö¹ºÂòÇëÇó²¢½ÓÊÕµ½ËùÊöÓÃ»§ÖÕ¶ËµÄÖ§¸¶²Ù×÷ºó£¬ÎªËùÊöÓÃ»§ÖÕ¶Ë·ÖÅä¶ÔÓ¦µÄ»áÔ±·þÎñµÄÊ¹ÓÃÈ¨ÏÞ²¢´ÓËùÊöÖ§¸¶ÕË»§¿Û³…	Ö§¸¶
Ò»ÖÖ»ùÓÚ¶¨Î»¼¼Êõ½øÐÐ´ó¶î×ªÕËÉí·ÝºËÊµµÄ·½·¨	ÉîÛÚÎ»ÖÃÍø¿Æ¼¼ÓÐÏÞ¹«Ë¾	2016-09-14	2017-01-25	CN106357638A	Ö÷·ÖÀàºÅ£ºH04L29/06(2006.01)I	ÓÐÐ§-ÊÚÈ¨	518000 ¹ã¶«Ê¡ÉîÛÚÊÐÄÏÉ½ÇøÄÏº£´óµÀ1031ºÅÍòº£´óÏÃC×ù502	±¾·¢Ã÷¹«¿ªÁËÒ»ÖÖ»ùÓÚ¶¨Î»¼¼Êõ½øÐÐ´ó¶î×ªÕËÉí·ÝºËÊµµÄ·½·¨£¬ÖÁÉÙ°üÀ¨ÈçÏÂ²½Öè£º²½Öè1£¬Í¨¹ý¶¨Î»ÏµÍ³»ñÈ¡×ªÕË·¢ÉúµØµãºÍ³Ö¿¨ÈËÊÖ»úµÄ¶¨Î»Êý¾Ý£»²½Öè2£¬Í¨¹ý·þÎñÆ÷±È¶Ô×ªÕË·¢ÉúµØµãºÍ³Ö¿¨ÈËÊÖ»úµÄ¾àÀë£¬ÔÚÉè¶¨µÄ°²È«¾àÀëÄÚ£¬ÔÊÐí×ªÕË£¬·´Ö®£¬Í¨Öª³Ö¿¨ÈË£»²½Öè3£¬³Ö¿¨ÈËÅÐ¶¨×ªÕË²Ù×÷ÊÇ·ñ¿ÉÒÔ±»ÊÚÈ¨£¬ÈôÊÚÈ¨£¬·þÎñÆ÷ÔÊÐí×ªÕË²Ù×÷£¬·´Ö®£¬³Ö¿¨ÈË±¨¾¯ÇóÖú¡£±¾·¢Ã÷µÄÓÐÒæÐ§¹ûÊÇ£ºÍ¨¹ý¶¨Î»ÏµÍ³ºÍ·þÎñÆ÷»ñÈ¡³Ö¿¨ÈËµÄÊÖ»úÎ»ÖÃ¡¢×ªÕËµãµÄÎ»ÖÃ…	°²È«
»ùÓÚ¿ÉÐÅAPPÁÐ±íµÄÒÆ¶¯Éè±¸APP°²×°¿ØÖÆ·½·¨	½­ËÕ±±¹­ÖÇÄÜ¿Æ¼¼ÓÐÏÞ¹«Ë¾	2016-09-14	2017-01-25	CN106355082A	Ö÷·ÖÀàºÅ£ºG06F21/51(2013.01)I	ÔÚÉó-ÊµÖÊÉó²éµÄÉúÐ§	210019 ½­ËÕÊ¡ÄÏ¾©ÊÐ½¨ÚþÇø°ÂÌå´ó½Ö69ºÅÐÂ³Ç¿Æ¼¼Ô°1¶°4Â¥	±¾·¢Ã÷Ìá¹©Ò»ÖÖ»ùÓÚ¿ÉÐÅAPPÁÐ±íµÄÒÆ¶¯Éè±¸APP°²×°¿ØÖÆ·½·¨¡£ËùÊöÒÆ¶¯Éè±¸APP°²×°¿ØÖÆ·½·¨£¬ÔÚAPP°²×°Ê±Ð£ÑéËùÊö¿ÉÐÅAPPÁÐ±íµÄÍêÕûÐÔ£»ÈôËùÊö¿ÉÐÅAPPÁÐ±íÍêÕûÐÔÐ£Ñé³É¹¦,¶ÁÈ¡´ý°²×°ÒÆ¶¯Éè±¸APPÃû×ÖÓë¿ÉÐÅAPPÁÐ±íÖÐµÄAPPÃû×ÖÒ»Ò»±È¶Ô,½øÐÐ¿ÉÐÅAPPÃû×ÖÆ¥Åä£»ÈôÆ¥Åä£¬Ôò½øÒ»²½¶ÔAPPµÄÍêÕûÐÔ½øÐÐÐ£Ñé£¬Èô¼ìÑé³É¹¦ÔÊÐíAPP°²×°£¬·ñÔò½ûÖ¹°²×°¡£±¾·¢Ã÷Ìá¹©µÄ»ùÓÚ¿ÉÐÅAPPÁÐ±íµÄÒÆ¶¯Éè±¸APP°²×°¿ØÖÆ·½·¨£¬ÄÜ¹»½ûÖ¹·Ç¿ÉÐÅÁÐ±íÄÚµÄAPP°²×°£¬ÄÜ…	°²È«
Ò»ÖÖÐÅÏ¢²É¼¯·½·¨¡¢×°ÖÃ¡¢Ò£¿ØÆ÷¡¢Éí·ÝÊ¶±ð·½·¨¼°×°ÖÃ	ÖÐÐËÍ¨Ñ¶¹É·ÝÓÐÏÞ¹«Ë¾	2016-09-18	2018-03-27	CN107844733A	Ö÷·ÖÀàºÅ£ºG06K9/00(2006.01)I	ÔÚÉó-¹«¿ª	518057 ¹ã¶«Ê¡ÉîÛÚÊÐÄÏÉ½Çø¸ßÐÂ¼¼Êõ²úÒµÔ°¿Æ¼¼ÄÏÂ·ÖÐÐËÍ¨Ñ¶´óÏÃ	±¾·¢Ã÷ÊµÊ©ÀýÌá¹©Ò»ÖÖÐÅÏ¢²É¼¯·½·¨¡¢×°ÖÃ¡¢Ò£¿ØÆ÷¡¢Éí·ÝÊ¶±ð·½·¨¼°×°ÖÃ£¬¸ÃÐÅÏ¢²É¼¯·½·¨°üÀ¨²É¼¯ÊÖÕÆ¾²ÂöÐÅÏ¢£»¶ÔÊÖÕÆ¾²ÂöÐÅÏ¢½øÐÐ´¦Àí£¬ÌáÈ¡³öÊÖÕÆ¾²ÂöÌØÕ÷ÐÅÏ¢£¬ÊÖÕÆ¾²ÂöÌØÕ÷ÐÅÏ¢ÓÃÓÚÉí·ÝÊ¶±ð£»²ÉÓÃÉÏÊö·½°¸£¬ÀûÓÃÊÖÕÆ¾²ÂöÌØÕ÷ÐÅÏ¢½øÐÐÉí·ÝÊ¶±ð£¬ÔÚÊ¹ÓÃÉÏ¼«Æä·½±ã£¬ÇÒÊÖÕÆ¾²ÂöÌØÕ÷ÐÅÏ¢ÊÇ»ùÓÚÊÖ¾²Âö»îÌåÌØÕ÷£¬°²È«ÐÔ¼«¸ß¡£	°²È«
Ò»ÖÖÃÜÂëÊäÈë·½·¨¼°ÖÕ¶Ë	ÉîÛÚÊÐ½ðÁ¢Í¨ÐÅÉè±¸ÓÐÏÞ¹«Ë¾	2016-09-26	2017-01-25	CN106355059A	Ö÷·ÖÀàºÅ£ºG06F21/31(2013.01)I	ÔÚÉó-ÊµÖÊÉó²éµÄÉúÐ§	518040 ¹ã¶«Ê¡ÉîÛÚÊÐ¸£ÌïÇøÉîÄÏ´óµÀ7028ºÅÊ±´ú¿Æ¼¼´óÏÃ¶«×ù21Â¥	±¾·¢Ã÷ÊµÊ©Àý¹«¿ªÁËÒ»ÖÖÃÜÂëÊäÈë·½·¨¼°ÖÕ¶Ë£¬ÆäÖÐ£¬ËùÊö·½·¨°üÀ¨£ºÈô¼ì²âµ½´¥·¢ºÚÆÁÊäÈëÃÜÂëµÄ²Ù×÷£¬»ñÈ¡ÓÃ»§ÔÚºÚÆÁ×´Ì¬ÏÂÊäÈëµÄ´¥Ãþ²Ù×÷£»¸ù¾ÝËùÊö´¥Ãþ²Ù×÷Éú³É¶ÔÓ¦µÄÃÜÂë£»Èô¼ì²âµ½È·ÈÏ½áÊøÊäÈëµÄ²Ù×÷£¬µãÁÁ´¥ÃþÆÁ£¬ÏÔÊ¾ÊäÈëÃÜÂëºóµÄ½»»¥½çÃæ¡£±¾·¢Ã÷ÊµÊ©ÀýÖÕ¶ËÍ¨¹ýÔÚºÚÆÁ×´Ì¬ÏÂ»ñÈ¡ÓÃ»§ÊäÈëµÄ´¥Ãþ²Ù×÷£¬¸ù¾Ý¸Ã´¥Ãþ²Ù×÷Éú³É¶ÔÓ¦µÄÃÜÂë£¬²¢ÔÚÊäÈë½áÊøºóµãÁÁ´¥ÃþÆÁ£¬²¢ÏÔÊ¾ÊäÈëÃÜÂëºóµÄ½»»¥½çÃæ£¬ÊµÏÖÁËÓÃ»§ÔÚºÚÆÁ×´Ì¬ÏÂÊäÈëÃÜÂë£…	°²È«
ÖÇÄÜÖÕ¶ËµÄ·ÃÎÊ¿ØÖÆ·½·¨¼°×°ÖÃ	±±¾©Ð¡Ã×ÒÆ¶¯Èí¼þÓÐÏÞ¹«Ë¾	2016-09-29	2017-02-22	CN106446721A	Ö÷·ÖÀàºÅ£ºG06F21/74(2013.01)I	ÔÚÉó-ÊµÖÊÉó²éµÄÉúÐ§	100085 ±±¾©ÊÐº£µíÇøÇåºÓÖÐ½Ö68ºÅ»ªÈóÎå²Ê³Ç¹ºÎïÖÐÐÄ¶þÆÚ9²ã01·¿¼ä	±¾¹«¿ªÊÇ¹ØÓÚÖÇÄÜÖÕ¶ËµÄ·ÃÎÊ¿ØÖÆ·½·¨¼°×°ÖÃ£¬ËùÊö·½·¨°üÀ¨£ºÔÚ¼à²âµ½ÖÇÄÜÖÕ¶ËµÄÓÃ»§½øÈëË¯Ãß×´Ì¬ºó£¬Æô¶¯ËùÊöÖÇÄÜÖÕ¶ËÖÐÔ¤ÉèµÄ·ÖÉíÏµÍ³£»ËùÊö·ÖÉíÏµÍ³Îª´ÓÖÇÄÜÖÕ¶ËÖÐ»®·Ö³öÀ´µÄÒ»¸öÓÃ»§¿Õ¼ä¶ÀÁ¢ÔËÐÐµÄÐéÄâÏµÍ³»·¾³£»µ±½ÓÊÕµ½¶ÔÖÇÄÜÖÕ¶ËµÄ·ÃÎÊÇëÇóÊ±£¬¿ØÖÆÔÊÐí·ÃÎÊËùÊöÖÇÄÜÖÕ¶ËµÄ·ÖÉíÏµÍ³²¢½ûÖ¹·ÃÎÊÆäËûÏµÍ³¿Õ¼ä¡£²ÉÓÃÕâÑùµÄ·½Ê½£¬ÔÚÔÊÐí·ÃÎÊ·ÖÉíÏµÍ³µÄÍ¬Ê±£¬½ûÖ¹·ÃÎÊÆäËûÏµÍ³¿Õ¼ä£¬±ÜÃâÁË±ÈÈç¸öÈËË½ÃÜÓ°Ïñ¡¢ÓÃ»§Í¨Ñ¶Â¼¡¢Éç½»ÍøÂçÖ…	Ö§¸¶
Ò»ÖÖÉí·ÝºË²éµÄ·½·¨	¹úÕþÍ¨¿Æ¼¼¹É·ÝÓÐÏÞ¹«Ë¾	2016-10-14	2017-03-15	CN106503519A	Ö÷·ÖÀàºÅ£ºG06F21/32(2013.01)I	ÔÚÉó-ÊµÖÊÉó²éµÄÉúÐ§	100195 ±±¾©ÊÐº£µíÇøÐÓÊ¯¿ÚÂ·¼×18ºÅº½ÌìÐÅÏ¢Ô°Ò»ºÅÂ¥Î÷ÇøËÄ²ã	±¾·¢Ã÷Ìá³öÁËÒ»ÖÖÉí·ÝºË²éµÄ·½·¨£¬Æä°üÀ¨£º²½Öè101¡¢²É¼¯ÓÃ»§Éí·ÝÐÅÏ¢£»²½Öè103¡¢²É¼¯ÓÃ»§ÉúÎï±êÊ¶ÐÅÏ¢£»²½Öè105¡¢½«ÉÏÊöÓëÖ®Ç°ÆäËûÊ±¿Ì²É¼¯µÄÏàÓ¦ÐÅÏ¢½øÐÐ±È¶Ô£»²½Öè107¡¢¸ù¾Ý±È¶Ô½á¹ûÅÐ¶ÏÓÃ»§ÕæÊµÐÔ¡£Í¨¹ý±¾·¢Ã÷µÄºË²é·½·¨£¬¿ÉÒÔÎªÐèÒªÊ¹ÓÃ¸öÈËÉí·ÝÐÅÏ¢µÄ²¿ÃÅÌá¹©¸ü¼ÓÕæÊµµÄÓÃ»§ÐÅÏ¢£¬ÕâÑù¸üÈÝÒ××·×Ùµ½Ê¹ÓÃÏà¹ØÏµÍ³µÄÓÃ»§£¬Îª·ÀÖ¹¸÷ÖÖµçÐÅ¡¢½ðÈÚÀàµÄÕ©Æ­Ìá¹©ÁË±£ÕÏ¡£	°²È«
Ò»ÖÖµç×ÓÉÌÎñ²ÆÎñÊý¾ÝÉú³É·½·¨¡¢×°ÖÃ¼°ÏµÍ³	¹ã¶«¾ÛÁªµç×ÓÉÌÎñ¹É·ÝÓÐÏÞ¹«Ë¾	2016-10-16	2017-05-10	CN106651558A	Ö÷·ÖÀàºÅ£ºG06Q40/00(2012.01)I	ÔÚÉó-ÊµÖÊÉó²éµÄÉúÐ§	510665 ¹ã¶«Ê¡¹ãÖÝÊÐÌìºÓÇø»ªÇ¿Â·9ºÅ2801·¿	±¾·¢Ã÷Ìá¹©Ò»ÖÖµç×ÓÉÌÎñ²ÆÎñÊý¾ÝÉú³É×°ÖÃ£¬°üÀ¨Ö÷»úºÍÓ¡ÖÆµçÂ·°å£¬±¾·¢Ã÷»¹Ìá¹©Ò»ÖÖµç×ÓÉÌÎñ²ÆÎñÊý¾ÝÉú³ÉÏµÍ³£¬°üÀ¨µç×ÓÉÌÎñ²ÆÎñÊý¾ÝÉú³É×°ÖÃ¡¢·þÎñÆ÷ÒÔ¼°ÏÔÊ¾Æ÷£¬ËùÊöµç×ÓÉÌÎñ²ÆÎñÊý¾ÝÉú³É×°ÖÃÍ¨¹ýÐÅºÅÁ¬½Ó·þÎñÆ÷ÒÔ¼°ÏÔÊ¾Æ÷£¬ËùÊö·þÎñÆ÷ÓÃÓÚÉú³Éµç×ÓÉÌÎñ²ÆÎñÊý¾Ý£¬ËùÊöµç×ÓÉÌÎñ²ÆÎñÊý¾ÝÉú³É×°ÖÃÍ¨¹ýÁ¬½Ó·þÎñÆ÷´Ó¶ø½ÓÊÕºÍ´¦Àíµç×ÓÉÌÎñ²ÆÎñÊý¾Ý£¬ËùÊöÏÔÊ¾Æ÷Í¨¹ýÓëµç×ÓÉÌÎñ²ÆÎñÊý¾ÝÉú³É×°ÖÃÁ¬½Ó¼Ì¶øÏÔÊ¾µç×ÓÉÌÎñ²ÆÎñÊý¾Ý£¬±¾·¢Ã÷»¹Ì…	°²È«
Éí·ÝÊ¶±ð·½·¨ºÍ×°ÖÃ	±±¾©Ð¡Ã×ÒÆ¶¯Èí¼þÓÐÏÞ¹«Ë¾	2016-10-20	2017-03-15	CN106503521A	Ö÷·ÖÀàºÅ£ºG06F21/32(2013.01)I	ÔÚÉó-ÊµÖÊÉó²éµÄÉúÐ§	100085 ±±¾©ÊÐº£µíÇøÇåºÓÖÐ½Ö68ºÅ»ªÈóÎå²Ê³Ç¹ºÎïÖÐÐÄ¶þÆÚ9²ã01·¿¼ä	±¾¹«¿ªÊÇ¹ØÓÚÒ»ÖÖÉí·ÝÊ¶±ð·½·¨ºÍ×°ÖÃ£¬ËùÊö·½·¨Ó¦ÓÃÓÚÐéÄâÏÖÊµVR£¬¸Ã·½·¨°üÀ¨£º¸ù¾ÝÓÃ»§µÄÉí·ÝÌØÕ÷ÐÅÏ¢Ê¶±ðËùÊöÓÃ»§µÄVRÉí·ÝÀà±ð£»ËùÊöVRÉí·ÝÀà±ðÓÃÓÚ±íÊ¾ËùÊöÓÃ»§µÄÉí·Ý£»¸ù¾ÝËùÊöVRÉí·ÝÀà±ðÓëVRÓÃ»§²Ù×÷Ä£Ê½Ö®¼äµÄÓ³Éä¹ØÏµ£¬È·¶¨ÓëËùÊöVRÉí·ÝÀà±ð¶ÔÓ¦µÄVRÓÃ»§²Ù×÷Ä£Ê½£¬¿ÉÒÔÎª²»Í¬µÄVRÉí·ÝÀà±ðµÄÓÃ»§È·¶¨²»Í¬µÄVRÓÃ»§²Ù×÷Ä£Ê½£¬´Ó¶øÎª²»Í¬Éí·ÝµÄÓÃ»§Ìá¹©ÏàÓ¦µÄÓ¦ÓÃºÍ·þÎñ£¬Ìá¸ßÓÃ»§ÌåÑé¡£	°²È«
Ò»ÖÖ±£ÕÏÖ§¸¶°²È«µÄ·½·¨ºÍÒÆ¶¯ÖÕ¶Ë	Î¬ÎÖÒÆ¶¯Í¨ÐÅÓÐÏÞ¹«Ë¾	2016-10-21	2017-03-22	CN106529943A	Ö÷·ÖÀàºÅ£ºG06Q20/38(2012.01)I	ÔÚÉó-ÊµÖÊÉó²éµÄÉúÐ§	523860 ¹ã¶«Ê¡¶«Ý¸ÊÐ³¤°²ÕòÎÚÉ³²½²½¸ß´óµÀ283ºÅ	±¾·¢Ã÷ÊµÊ©ÀýÌá¹©ÁËÒ»ÖÖ±£ÕÏÖ§¸¶°²È«µÄ·½·¨¼°ÒÆ¶¯ÖÕ¶Ë£¬Éæ¼°ÒÆ¶¯ÖÕ¶Ë¼¼ÊõÁìÓò¡£ËùÊö·½·¨°üÀ¨£º¼à¿ØÒÆ¶¯ÖÕ¶ËÏÔÊ¾½çÃæÖÐÕ¹Ê¾µÄÒ³Ãæ£»ÈôËùÊöÏÔÊ¾½çÃæÖÐÕ¹Ê¾µÄÒ³ÃæÎªÖ§¸¶Ò³Ãæ£¬Ôò¼à¿ØÔÚËùÊöÖ§¸¶Ò³ÃæÖÐµÄÊäÈë´¥·¢Ö¸Áî£»Èô¼à¿Øµ½ÔÚËùÊöÖ§¸¶Ò³ÃæÖÐµÄÊäÈë´¥·¢Ö¸Áî£¬Ôò¿ªÆôÏµÍ³°²È«¼üÅÌ¡£½â¾öÁËÓÃ»§ÔÚÖ§¸¶Ê±´æÔÚµÄ°²È«Òþ»¼£¬µ¼ÖÂµÄÖ§¸¶°²È«´æÔÚ·çÏÕµÄÎÊÌâ¡£	°²È«
Ò»ÖÖ°²È«¼ì²âµÄ·½·¨ºÍÒÆ¶¯ÖÕ¶Ë	Î¬ÎÖÒÆ¶¯Í¨ÐÅÓÐÏÞ¹«Ë¾	2016-10-21	2017-03-15	CN106503554A	Ö÷·ÖÀàºÅ£ºG06F21/56(2013.01)I	ÔÚÉó-ÊµÖÊÉó²éµÄÉúÐ§	523860 ¹ã¶«Ê¡¶«Ý¸ÊÐ³¤°²ÕòÎÚÉ³²½²½¸ß´óµÀ283ºÅ	±¾·¢Ã÷ÊµÊ©ÀýÌá¹©ÁËÒ»ÖÖ°²È«¼ì²âµÄ·½·¨¼°ÒÆ¶¯ÖÕ¶Ë£¬Éæ¼°ÒÆ¶¯ÖÕ¶Ë¼¼ÊõÁìÓò¡£ËùÊö·½·¨°üÀ¨£º¼à¿ØÒÆ¶¯ÖÕ¶ËÏÔÊ¾½çÃæÖÐÕ¹Ê¾µÄÒ³Ãæ£»ÈôËùÊöÏÔÊ¾½çÃæÖÐÕ¹Ê¾µÄÒ³ÃæÎªÖ§¸¶Ò³Ãæ£¬Ôò¶ÔËùÊöÒÆ¶¯ÖÕ¶ËÏµÍ³½øÐÐ°²È«¼ì²â¡£½â¾öÁËÓÃ»§ÔÚÖ§¸¶Ê±°²È«´æÔÚ·çÏÕµÄÎÊÌâ¡£	°²È«
Ò»ÖÖ°²È«¼ì²âµÄ·½·¨ºÍÒÆ¶¯ÖÕ¶Ë	Î¬ÎÖÒÆ¶¯Í¨ÐÅÓÐÏÞ¹«Ë¾	2016-10-21	2017-03-29	CN106548072A	Ö÷·ÖÀàºÅ£ºG06F21/56(2013.01)I	ÔÚÉó-ÊµÖÊÉó²éµÄÉúÐ§	523860 ¹ã¶«Ê¡¶«Ý¸ÊÐ³¤°²ÕòÎÚÉ³²½²½¸ß´óµÀ283ºÅ	±¾·¢Ã÷ÊµÊ©ÀýÌá¹©ÁËÒ»ÖÖ°²È«¼ì²âµÄ·½·¨¼°ÒÆ¶¯ÖÕ¶Ë£¬Éæ¼°ÒÆ¶¯ÖÕ¶Ë¼¼ÊõÁìÓò¡£ËùÊö·½·¨°üÀ¨£º¼à¿ØÒÆ¶¯ÖÕ¶ËÏÔÊ¾½çÃæÖÐÕ¹Ê¾µÄÒ³Ãæ£»ÈôËùÊöÏÔÊ¾½çÃæÖÐÕ¹Ê¾µÄÒ³ÃæÎªÖ§¸¶Ò³Ãæ£¬Ôò¶ÔËùÊöÒÆ¶¯ÖÕ¶ËÁ¬½ÓµÄÎÞÏßÍøÂç½øÐÐ°²È«¼ì²â¡£½â¾öÁËÓÃ»§ÔÚÊ¹ÓÃÒÆ¶¯ÖÕ¶ËÁ¬½ÓµÄÎÞÏßÍøÂç´æÔÚµÄ°²È«Òþ»¼£¬¶øµ¼ÖÂµÄÖ§¸¶°²È«´æÔÚ·çÏÕµÄÎÊÌâ¡£	°²È«
Ò»ÖÖ±£ÕÏÖ§¸¶°²È«µÄ·½·¨ºÍÒÆ¶¯ÖÕ¶Ë	Î¬ÎÖÒÆ¶¯Í¨ÐÅÓÐÏÞ¹«Ë¾	2016-10-21	2017-03-15	CN106503555A	Ö÷·ÖÀàºÅ£ºG06F21/56(2013.01)I	ÔÚÉó-ÊµÖÊÉó²éµÄÉúÐ§	523860 ¹ã¶«Ê¡¶«Ý¸ÊÐ³¤°²ÕòÎÚÉ³²½²½¸ß´óµÀ283ºÅ	±¾·¢Ã÷ÊµÊ©ÀýÌá¹©ÁËÒ»ÖÖ±£ÕÏÖ§¸¶°²È«µÄ·½·¨¼°ÒÆ¶¯ÖÕ¶Ë£¬Éæ¼°ÒÆ¶¯ÖÕ¶Ë¼¼ÊõÁìÓò¡£ËùÊö·½·¨°üÀ¨£º¼à¿ØÒÆ¶¯ÖÕ¶ËÏÔÊ¾½çÃæÖÐÕ¹Ê¾µÄÒ³Ãæ£»ÈôËùÊöÏÔÊ¾½çÃæÖÐÕ¹Ê¾µÄÒ³ÃæÎªÖ§¸¶Ò³Ãæ£¬Ôò¼à¿ØÏµÍ³ºóÌ¨ÔËÐÐµÄÓ¦ÓÃ£»Èô¼ì²âµ½ËùÊöÏµÍ³ºóÌ¨ÔËÐÐµÄÓ¦ÓÃÓëÔ¤ÉèÓ¦ÓÃ°×Ãûµ¥ÖÐµÄÓ¦ÓÃ²»Æ¥Åä£¬Ôò¹Ø±ÕËùÊöÓ¦ÓÃ¡£½â¾öÁËÓÃ»§ÔÚÊ¹ÓÃÒÆ¶¯ÖÕ¶Ë½øÐÐÖ§¸¶Ê±Ö§¸¶°²È«´æÔÚ·çÏÕµÄÎÊÌâ¡£	°²È«
Ò»ÖÖÏûÏ¢´¦ÀíµÄ·½·¨ºÍ×°ÖÃ	±±¾©Ð¡Ã×ÒÆ¶¯Èí¼þÓÐÏÞ¹«Ë¾	2016-10-27	2017-02-01	CN106372943A	Ö÷·ÖÀàºÅ£ºG06Q20/40(2012.01)I	ÔÚÉó-ÊµÖÊÉó²éµÄÉúÐ§	100085 ±±¾©ÊÐº£µíÇøÇåºÓÖÐ½Ö68ºÅ»ªÈóÎå²Ê³Ç¹ºÎïÖÐÐÄ¶þÆÚ9²ã01·¿¼ä	±¾¹«¿ªÊÇ¹ØÓÚÒ»ÖÖÏûÏ¢´¦ÀíµÄ·½·¨ºÍ×°ÖÃ£¬ÊôÓÚ¼ÆËã»ú¼¼ÊõÁìÓò¡£ËùÊö·½·¨°üÀ¨£º½ÓÊÕÏûÏ¢£»Èç¹ûËùÊöÏûÏ¢ÖÐ°üº¬ÖÁÉÙÒ»¸öÔ¤ÉèµÄÓëÃô¸ÐÐÅÏ¢Ïà¹ØµÄ¹Ø¼ü´Ê£¬Ôò½«ËùÊöÏûÏ¢´æ´¢ÖÁÔ¤ÉèµÄ¼ÓÃÜ´æ´¢Çø£¬ËùÊö¼ÓÃÜ´æ´¢ÇøÖÐµÄÊý¾ÝÍ¨¹ýÔ¤ÉèÃÜÂë¼ÓÃÜ£»µ±½ÓÊÕµ½ËùÊö¼ÓÃÜ´æ´¢ÇøÖÐµÄËùÊöÏûÏ¢µÄ¶ÁÈ¡Ö¸ÁîÊ±£¬»ñÈ¡ËùÊöÏûÏ¢µÄ¶ÁÈ¡ÃÜÂë£»Èç¹û»ñÈ¡µÄ¶ÁÈ¡ÃÜÂëÓëËùÊöÔ¤ÉèÃÜÂëÏàÍ¬£¬Ôò¶ÔËùÊö¼ÓÃÜ´æ´¢ÇøÖÐµÄËùÊöÏûÏ¢½øÐÐ¶ÁÈ¡´¦Àí¡£²ÉÓÃ±¾¹«¿ª£¬¿ÉÒÔÌá¸ßÍøÉÏÖ§¸¶µÄ°…	°²È«
Ò»ÖÖÓ¦ÓÃFPGA¼ÓÃÜ¿¨µÄÎ¢ÐÍ¹ÉÊÐÊý¾Ý´¦ÀíÏµÍ³	³É¶¼Á¦ÑÅÐÅÏ¢¼¼ÊõÓÐÏÞ¹«Ë¾	2016-10-28	2017-03-22	CN106529314A	Ö÷·ÖÀàºÅ£ºG06F21/60(2013.01)I	ÔÚÉó-ÊµÖÊÉó²éµÄÉúÐ§	610000 ËÄ´¨Ê¡³É¶¼ÊÐÌì¸®ÐÂÇø»ªÑô½ÖµÀ»ªÑô´óµÀ159ºÅ	±¾·¢Ã÷¹«¿ªÁËÒ»ÖÖÓ¦ÓÃFPGA¼ÓÃÜ¿¨µÄÎ¢ÐÍ¹ÉÊÐÊý¾Ý´¦ÀíÏµÍ³£¬°üÀ¨FPGAÄ£¿é¡¢¼Ó½âÃÜÄ£¿é¡¢·Ç¶Ô³ÆËã·¨Ä£¿éºÍÖ÷¿ØÄ£¿é£¬¼Ó½âÃÜÄ£¿é¡¢·Ç¶Ô³ÆËã·¨Ä£¿éºÍÖ÷¿ØÄ£¿é·Ö±ðÓëFPGAÄ£¿éÁ¬½Ó£¬Ö÷¿ØÄ£¿éºÍ·Ç¶Ô³ÆËã·¨Ä£¿é·Ö±ðÓë½Ó¿Ú¿ØÖÆÓë×ª»»µ¥ÔªÁ¬½Ó£»FPGAÄ£¿é°üÀ¨PCIÐ­Òéµ¥Ôª¡¢µÚÒ»´æ´¢Ä£¿é¡¢µÚ¶þ´æ´¢Ä£¿éºÍ½Ó¿Ú¿ØÖÆÓë×ª»»µ¥Ôª£¬PCIÐ­Òéµ¥ÔªÍ¨¹ýµÚÒ»´æ´¢Ä£¿é½«Êý¾Ý´«ÊäÖÁ½Ó¿Ú¿ØÖÆÓë×ª»»µ¥Ôª£¬½Ó¿Ú¿ØÖÆÓë×ª»»µ¥ÔªÍ¨¹ýµÚ¶þ´æ´¢Ä£¿é½«Êý¾Ý´«ÊäÖÁPCIÐ­…	Í¶×Ê
Ò»ÖÖ×Ê½ð½»Ò×°²È«¹ÜÀíÏµÍ³	ºÏ·ÊÌìÑ¶ÒÚ´ï¹âµç¼¼ÊõÓÐÏÞ¹«Ë¾	2016-11-04	2017-03-22	CN106529959A	Ö÷·ÖÀàºÅ£ºG06Q20/40(2012.01)I	Ê§Ð§-·¢Ã÷×¨ÀûÉêÇë¹«²¼ºóµÄ²µ»Ø	230000 °²»ÕÊ¡ºÏ·ÊÊÐ¸ßÐÂÇø¿ÆÑ§´óµÀ102ºÅ´´Òµ·þÎñÖÐÐÄ7ºÅÂ¥305-3ÊÒ	±¾·¢Ã÷¹«¿ªÁËÒ»ÖÖ×Ê½ð½»Ò×°²È«¹ÜÀíÏµÍ³£¬°üÀ¨×¢²áµÇÂ½Ä£¿é¡¢Êý¾Ý²éÑ¯Ä£¿é¡¢ÍøÂç·þÎñÆ÷¡¢Êý¾Ý¿âÄ£¿é¡¢¶©µ¥Í¶ËßÄ£¿é¡¢µÚÈý·½È·ÈÏÄ£¿é¡¢×Ê½ð´æ´¢Ä£¿é¡¢ÔÚÏßÖ§¸¶Ä£¿é¡¢¶ÌÐÅÍ¨ÖªÄ£¿é¡¢Ö¸ÎÆÊ¶±ðÄ£¿é¡£±¾·¢Ã÷Í¨¹ýµÚÈý·½È·ÈÏÄ£¿é¡¢×Ê½ð´æ´¢Ä£¿é¡¢Ö¸ÎÆÊ¶±ðÄ£¿éµÄÏµÍ³½á¹¹Éè¼Æ£¬¶Ô½»Ò×Ë«·½ÔÚÏß½»Ò×Êý¾Ý½øÐÐ°²È«¹ÜÀí£¬·ÀÖ¹ÁËÓÃ»§ÐÅÏ¢µÄÐ¹Â¶£¬±£ÕÏÁËÓÃ»§½»Ò×µÄ°²È«£¬ÄÜ¹»Í¨¹ýµÚÈý·½È·ÈÏÄ£¿é½øÐÐÍ¶Ëß´¦Àí£¬±£ÕÏÁËÓÃ»§»ù±¾È¨Òæ£¬ÓÐÀûÓÚÌá¸ßÔÚÏß½…	°²È«
Ò»ÖÖ·À¹¥»÷µÄ°²È«POS»ú¼°°²È«±£»¤·½·¨	ÉÏº£¶¯ÁªÐÅÏ¢¼¼Êõ¹É·ÝÓÐÏÞ¹«Ë¾	2016-11-09	2017-04-26	CN106600850A	Ö÷·ÖÀàºÅ£ºG07G1/00(2006.01)I	ÔÚÉó-ÊµÖÊÉó²éµÄÉúÐ§	201203 ÉÏº£ÊÐÆÖ¶«ÐÂÇøÖÐ¹ú£¨ÉÏº££©×ÔÓÉÃ³Ò×ÊÔÑéÇø±Ì²¨Â·888ºÅ5´±5²ã	±¾·¢Ã÷¹«¿ªÁËÒ»ÖÖ·À¹¥»÷µÄ°²È«POS»ú¼°°²È«±£»¤·½·¨£¬±¾·½°¸ÖÐÔÚÏà¶ÔÓÚ´¥ÃþÆÁÉèÖÃ´¥ÃþÆÁ°²È«´¥·¢µ¥Ôª£¬¸Ã´¥ÃþÆÁ°²È«´¥·¢µ¥ÔªÁ¬½ÓÓÚ°²È«¿ØÖÆÄ£¿é£¬¶ø°²È«¿ØÖÆÄ£¿éÉèÖÃÔÚPOS»úÄÚµÄPCB°åÉÏ£¬»ùÓÚ´¥ÃþÆÁ°²È«´¥·¢µ¥ÔªÊµÊ±¼ì²â´¥ÃþÆÁµÄ°²È«×´Ì¬£¬ÔÚ´¥ÃþÆÁ´¦ÓÚ·Ç°²È«×´Ì¬Ê±£¬´¥·¢±£»¤»úÖÆ¡£±¾·¢Ã÷Ìá¹©µÄ·½°¸ÃÖ²¹ÁËÖÇÄÜPOS»ú´¥ÃþÆÁ×îÈÝÒ×ÔâÊÜ¹¥»÷µÄÈ±µã£¬ÎªÖÇÄÜPOS»úÍ¨¹ý°²È«ÈÏÖ¤ºÍ»ñµÃ´ó¹æÄ£ÉÌÓÃÌá¹©ÁË°²È«»ù´¡¡£	°²È«
Ò»ÖÖ¾­¼Ã¹ÜÀí³É±¾¿ØÖÆÏµÍ³	ºÓÄÏ³Ç½¨Ñ§Ôº	2016-11-11	2017-05-31	CN106779281A	Ö÷·ÖÀàºÅ£ºG06Q10/06(2012.01)I	ÔÚÉó-ÊµÖÊÉó²éµÄÉúÐ§	467036 ºÓÄÏÊ¡Æ½¶¥É½ÊÐÐÂ³ÇÇøÁúÏè´óµÀ	±¾·¢Ã÷¹«¿ªÁË³É±¾¿ØÖÆ¼¼ÊõÁìÓòµÄÒ»ÖÖ¾­¼Ã¹ÜÀí³É±¾¿ØÖÆÏµÍ³£¬°üÀ¨¿Í»§¶Ë×ÓÏµÍ³£¬ËùÊö¿Í»§¶Ë×ÓÏµÍ³µçÐÔÊä³öÁ¬½ÓÖÐÑë´¦ÀíÆ÷£¬ËùÊöÖÐÑë´¦ÀíÆ÷·Ö±ðµçÐÔÊä³öÁ¬½Ó·ÖÎö×ÓÏµÍ³¡¢·´À¡×ÓÏµÍ³ºÍÏÔÊ¾×ÓÏµÍ³£¬±¾·¢Ã÷Í¨¹ý¶ÔÊ¹ÓÃÈËÔ±½øÐÐÉí·ÝÑéÖ¤£¬ÔöÇ¿ÁË°²È«ÐÔ£¬Í¨¹ýÊý¾Ý¹²Ïíµ¥Ôª¿ÉÒÔ½«Êý¾Ý¶ÔÍâ½øÐÐ¹²Ïí£¬Í¨¹ýÊý¾Ý¿â¸üÐÂµ¥Ôª¶ÔÊý¾Ý½øÐÐÊµÊ±¸üÐÂ£¬Ê¹´¦Àí¾ö²ßÓëÊ±¾ã½ø£¬Í¨¹ý¶Ô³É±¾½øÐÐ·ÖÎö£¬·çÏÕÆÀ¹ÀºÍ×¨¼Ò¾ö²ß£¬Ê¹³É±¾¿ØÖÆ¸ü¼ÓºÏÀí¡£	°²È«
Ò»ÖÖ²ÉÓÃ¹ú¼ÒÉÌÓÃÃÜÂëËã·¨µÄÉè±¸ÈÏÖ¤·½·¨	Î÷°²Ô¶Ì÷ÍøÂç¿Æ¼¼ÓÐÏÞ¹«Ë¾	2016-11-11	2017-03-22	CN106533683A	Ö÷·ÖÀàºÅ£ºH04L9/30(2006.01)I	ÔÚÉó-ÊµÖÊÉó²éµÄÉúÐ§	710075 ÉÂÎ÷Ê¡Î÷°²ÊÐ¸ßÐÂÇø¸ßÐÂÒ»Â·25ºÅ´´Òµ´óÏÃS411ÊÒ	±¾·¢Ã÷¹«¿ªÁËÒ»ÖÖ²ÉÓÃ¹ú¼ÒÉÌÓÃÃÜÂëËã·¨µÄÉè±¸ÈÏÖ¤·½·¨£¬°üÀ¨ÁËSM2µÄ¹«Ë½Ô¿Éú³É£¬¹«Ô¿·¢²¼Á÷³Ì¹ÜÀí£¬ÌØÕ÷Âë¹ÜÀí£¬Ëæ»ú¶¯Ì¬ÂëºÍÌØÕ÷Âë»ìºÏËã·¨£¬¼Ó½âÃÜÑéÖ¤£¬×´Ì¬¿ØÖÆµÈ²Ù×÷¡£±¾·¢Ã÷ÂÊÏÈ½«¹ú¼ÒÉÌÓÃÃÜÂëËã·¨Ó¦ÓÃµ½ÍâÖÃÃÜÂë¼üÅÌºÍÉÏÎ»»úµÄÎÕÊÖÈÏÖ¤ÖÐ£¬ÔöÇ¿ÁËÉè±¸½ÓÈëµÄ°²È«ÐÔºÍ¿É¿ØÐÔ£»ÔÚ±¾¹«Ë¾Éè¼ÆÉú²úµÄÍâÖÃÃÜÂë¼üÅÌ(Ö§³Ö¹ú¼ÒÉÌÓÃÃÜÂëËã·¨SM2/SM3/SM4)ÉÏ£¬ÀûÓÃSM2Ëã·¨ÊµÏÖµÄÒ»ÖÖ¸ß°²È«¼¶±ðµÄÉè±¸ÈÏÖ¤·½·¨£¬²ÉÓÃ´Ë·½·¨¿ÉÒÔÈÃÍâÖÃÃÜÂë…	°²È«
ÖÇÄÜÐý×ªË«ÉãÏñÍ·ÐÅÏ¢²É¼¯ÒÇ	É½¶«Í¬ÖÇÎ°ÒµÈí¼þ¹É·ÝÓÐÏÞ¹«Ë¾	2016-11-16	2017-03-08	CN106485129A	Ö÷·ÖÀàºÅ£ºG06F21/32(2013.01)I	ÔÚÉó-ÊµÖÊÉó²éµÄÉúÐ§	250101 É½¶«Ê¡¼ÃÄÏÊÐ¸ßÐÂÇøË´»ªÂ·2000ºÅË´Ì©¹ã³¡6ºÅÂ¥2301ÊÒ	ÖÇÄÜÐý×ªË«ÉãÏñÍ·ÐÅÏ¢²É¼¯ÒÇ°üÀ¨ÉÏÉãÏñ²¿¡¢ÏÂÉãÏñ²¿¡¢USB²åÍ·ºÍÁ¬½ÓÏÂÉãÏñ²¿ÓëUSB²åÍ·µÄÁ¬½Ó¸Ë£¬ÉÏÉãÏñ²¿Í¨¹ýÐý×ª»ú¹¹ÓëÏÂÉãÏñ²¿µÄ¶¥¶ËÁ¬½Ó£¬ÔÚÉÏÉãÏñ²¿µÄÇ°·½ÉèÖÃÓÐÈËÁ³ÐÅÏ¢²É¼¯ÉãÏñÍ·£»ÏÂÉãÏñ²¿ÉèÖÃÓÐÇ©×ÖÊÖÊÆ²É¼¯ÉãÏñÍ·£¬Ç©×ÖÊÖÊÆ²É¼¯ÉãÏñÍ·ËùÔÚµÄÆ½ÃæÓëË®Æ½ÃæµÄ¼Ð½ÇÎªÈñ½Ç£»ÈËÁ³ÐÅÏ¢²É¼¯ÉãÏñÍ·ºÍÇ©×ÖÊÖÊÆ²É¼¯ÉãÏñÍ·¾ùÍ¨¹ýÊý¾ÝÏßÓëËùÊöUSB²åÍ·Á¬½Ó¡£±¾·¢Ã÷ÉÏÉãÏñ²¿ºÍÏÂÉãÏñ²¿¿ÉÒÔÍ¬Ê±¶ÔÇ©×Ö×ÅµÄÃæ²¿ÐÅÏ¢ºÍÇ©×ÖµÄÊÖÊÆ½øÐÐÐÅÏ¢²É…	°²È«
ÈÚºÏÖ¸ÎÆÊ¶±ðÓëNFC¼¼ÊõµÄWLANÈÏÖ¤·½·¨	Ìì½ò´óÑ§	2016-11-17	2017-04-05	CN106559743A	Ö÷·ÖÀàºÅ£ºH04W4/00(2009.01)I	ÔÚÉó-ÊµÖÊÉó²éµÄÉúÐ§	300072 Ìì½òÊÐÄÏ¿ªÇøÎÀ½òÂ·92ºÅ	±¾·¢Ã÷¹«¿ªÒ»ÖÖÈÚºÏÖ¸ÎÆÊ¶±ðÓëNFC¼¼ÊõµÄWLANÈÏÖ¤·½·¨£¬°üÀ¨ÏÂÁÐ²½Öè£ºÔÚÈÏÖ¤¿ªÊ¼Ê±£¬Ö¸ÎÆÉ¨ÃèÕóÁÐ²É¼¯ÓÃ»§Ö¸ÎÆµÄÌØÕ÷ÐÅÏ¢£¬Ê¹ÓÃ¼ÓÃÜËã·¨´«ÊäÖÁ°²È«µ¥ÔªSE£¬°²È«µ¥ÔªSE¶Ô±È²É¼¯µÄÖ¸ÎÆÐÅÏ¢ÓëÊÖ»úºÏ·¨ÓÃ»§Ö¸ÎÆÐÅÏ¢£¬ÈôÍ¨¹ýÑéÖ¤ÔòÔÊÐí·ÃÎÊ°²È«µ¥ÔªSEÖÐµÄ¸öÈËÈÏÖ¤ÐÅÏ¢£»·ñÔòÑéÖ¤ÖÕÖ¹£¬ÌáÊ¾ÓÃ»§²»¾ßÓÐºÏ·¨½ÓÈëÈ¨£»Ö¸ÎÆÐÅÏ¢ÑéÖ¤Í¨¹ýºó£¬Í¨¹ýNFCÄ£¿éÔÚ¿ÕÆøÐÅµÀÖÐ¼ÓÔØ¼ÓÃÜËã·¨£¬½¨Á¢°²È«ÐÅµÀ£¬½«°²È«µ¥ÔªSEÖÐÓÃÓÚÃÅ½ûÈÏÖ¤µÄÓÃ»§¸öÈËÐÅÏ¢¼ÓÃ…	°²È«
Ò»ÖÖ½»Ò×ÏµÍ³µÄÕËºÅ¹ÜÀí·½·¨¡¢×°ÖÃ¼°ÏµÍ³	¹ãÖÝÆÕ»Ý´´ÐÂ½ðÈÚÐÅÏ¢·þÎñÓÐÏÞ¹«Ë¾	2016-11-18	2017-05-31	CN106778215A	Ö÷·ÖÀàºÅ£ºG06F21/45(2013.01)I	ÔÚÉó-ÊµÖÊÉó²éµÄÉúÐ§	510000 ¹ã¶«Ê¡¹ãÖÝÊÐÌìºÓÇøË¼³ÉÂ·17ºÅ701·¿	±¾·¢Ã÷Éæ¼°ÕËºÅ¹ÜÀí¼¼ÊõÁìÓò£¬ÌØ±ðÉæ¼°Ò»ÖÖ×Ê²ú½»Ò×ÏµÍ³µÄÕËºÅ¹ÜÀí·½·¨¡¢×°ÖÃºÍÏµÍ³¡£¸Ã·½·¨Í¨¹ý¶ÔÕËºÅ¹ÜÀí½øÐÐÈ¨ÏÞ²ð·Ö£¬ÏµÍ³¹ÜÀíÔ±¾ßÓÐ×î´óÈ¨ÏÞ£¬¿ÉÒÔ´´ÏµÍ³²Ù×÷Ô±£¬ÏµÍ³²Ù×÷Ô±ÓÖ·ÖÎª¾­°ìÔ±ºÍÉóºËÔ±£¬¾­°ìÔ±¸ºÔð´´½¨ÊÚÈ¨¡¢ÐÞ¸ÄÊÚÈ¨¼°ÒµÎñÊÚÈ¨£¬ÉóºËÔ±Ðè¶Ô¾­°ìÔ±´´½¨ÊÚÈ¨¡¢ÐÞ¸ÄÊÚÈ¨ºÍÒµÎñÊÚÈ¨½øÐÐÉóºË£¬ÏµÍ³²»ÌØÖ¸Ä³Ò»²Ù×÷Ô±Îª¾­°ìÔ±»òÉóºËÔ±¡£ÔÚÒµÎñÊÚÈ¨Ê±£¬Ã÷È·ÒµÎñ²Ù×÷Ô±È¨ÏÞµÄÍ¬Ê±£¬Ò²ÉèÖÃ¾­°ìÔ±ºÍÉóºËÔ±Á½ÖÖÉí·ÝÈ¨ÏÞ¡£ÑÏ¸ñÏ…	°²È«
»ùÓÚ³¬´óÈÝÁ¿FPGAµÄÉî¶ÈÑ§Ï°¸öÈËÐÅÏ¢¹ÜÀíÏµÍ³	ºÏ·ÊÃúïÈÎ°Í¾ÐÅÏ¢¿Æ¼¼ÓÐÏÞ¹«Ë¾	2016-11-18	2017-05-31	CN106789879A	Ö÷·ÖÀàºÅ£ºH04L29/06(2006.01)I	ÔÚÉó-ÊµÖÊÉó²éµÄÉúÐ§	230000 °²»ÕÊ¡ºÏ·ÊÊÐ¸ßÐÂÇøºì·ãÂ·9ºÅÖÐÈð´óÏÃB×ù201ÊÒ	±¾·¢Ã÷¹«¿ªÁË»ùÓÚ³¬´óÈÝÁ¿FPGAµÄÉî¶ÈÑ§Ï°¸öÈËÐÅÏ¢¹ÜÀíÏµÍ³£¬°üÀ¨£ºAPPÐÅÏ¢½ÓÊÕÄ£¿é£¬ÓÃÓÚ½«ÓÃ»§¶Ë¼ÇÂ¼ÐÅÏ¢´«ÊäÖÁFPGAÉî¶ÈÑ§Ï°Ä£¿éºÍ´æ´¢Ä£¿é£»´æ´¢Ä£¿é£¬ÓÃÓÚ´æ´¢¼ÇÂ¼ÐÅÏ¢ºÍÒþË½ÐÅÏ¢£»FPGAÉî¶ÈÑ§Ï°Ä£¿é£¬ÓÃÓÚ½ÓÊÕAPPÐÅÏ¢½ÓÊÕÄ£¿éÊäÈëµÄ¼ÇÂ¼ÐÅÏ¢£¬É¸Ñ¡³ö¼ÇÂ¼ÐÅÏ¢ÖÐµÄÒþË½ÐÅÏ¢£¬½«ÒþË½ÐÅÏ¢´æ´¢ÓÚ´æ´¢Ä£¿éÖÐ£¬ÔÚÓÃ»§¶ËÐèÒª½øÐÐÉí·ÝÑéÖ¤Ê±£¬·þÎñÆ÷ÓëFPGAÉî¶ÈÑ§Ï°Ä£¿éÍ¨ÐÅ£¬FPGAÉî¶ÈÑ§Ï°Ä£¿é¸ù¾Ý´æ´¢ÓÚËùÊö´æ´¢Ä£¿éÖÐµÄÒþË½ÐÅÏ¢Ëæ»úÌá³…	°²È«
Ò»ÖÖ±ãÐ¯Ê½°²È«ÒøÐÐ¿¨Ì×	ºÏ·ÊÐÇ·þÐÅÏ¢¿Æ¼¼ÓÐÏÞÔðÈÎ¹«Ë¾	2016-11-23	2017-04-26	CN106600825A	Ö÷·ÖÀàºÅ£ºG07F7/10(2006.01)I	Ê§Ð§-·¢Ã÷×¨ÀûÉêÇë¹«²¼ºóµÄÊÓÎª³·»Ø	230051 °²»ÕÊ¡ºÏ·ÊÊÐ°üºÓÇøÂ®ÖÝ´óµÀ58ºÅÌ©Ê¢¹ã³¡2´±×ÛºÏÂ¥1118ÊÒ	±¾·¢Ã÷µÄÄ¿µÄÊÇÌá¹©Ò»ÖÖ×Ô¶¯ÊµÊ±ÐÞ¸ÄÒøÐÐ¿¨ÃÜÂë£¬´Ó¶ø±£Ö¤ÃÜÂë²»»áÐ¹Â©µÄÒøÐÐ¿¨¿¨Ì××°ÖÃ¡£°üÀ¨Ö¸ÎÆÃÜÂëËø¡¢¶Á¿¨µ¥Ôª¡¢Í¨Ñ¶µ¥Ôª¡¢ÃÜÂë¹ÜÀíµ¥Ôª¡£	°²È«
ÒÆ¶¯ÖÕ¶ËºÍ»ùÓÚ¸ÃÒÆ¶¯ÖÕ¶ËµÄÇ¶ÈëÊ½°²È«Ä£¿éµÄ·ÃÎÊ·½·¨	±±¾©ÎÕÆæÖÇÄÜ¿Æ¼¼ÓÐÏÞ¹«Ë¾	2016-11-23	2017-05-10	CN106650461A	Ö÷·ÖÀàºÅ£ºG06F21/57(2013.01)I	ÔÚÉó-×¨ÀûÉêÇëÈ¨¡¢×¨ÀûÈ¨µÄ×ªÒÆ	100102 ±±¾©ÊÐ³¯ÑôÇøÍû¾©ÀûÔóÖÐÔ°101ºÅÆôÃ÷¹ú¼Ê´óÏÃÎ÷²à°Ë²ã	±¾·¢Ã÷¹«¿ªÁËÒ»ÖÖÒÆ¶¯ÖÕ¶ËºÍ»ùÓÚ¸ÃÒÆ¶¯ÖÕ¶ËµÄÇ¶ÈëÊ½°²È«Ä£¿é·ÃÎÊ·½·¨£¬ÊôÓÚ°²È«Í¨ÐÅ¼¼ÊõÁìÓò¡£ËùÊöÒÆ¶¯ÖÕ¶ËÖÐ¾ß±¸¿ÉÐÅÔËÐÐ»·¾³Ä£¿éTEE£¬ÒÆ¶¯ÖÕ¶ËÖÐÄÚÖÃÓÐÇ¶ÈëÊ½°²È«Ä£¿éeSE£¬ËùÊö¿ÉÐÅÔËÐÐ»·¾³Ä£¿éTEEÍ¨¹ýSPI½Ó¿ÚÓëÇ¶ÈëÊ½°²È«Ä£¿éeSEÍ¨ÐÅ£¬¿ÉÐÅÔËÐÐ»·¾³Ä£¿éTEEÎªSPIÍ¨ÐÅµÄÖ÷Éè±¸£¬Ç¶ÈëÊ½°²È«Ä£¿éeSEÎª´ÓÉè±¸¡£±¾·¢Ã÷ËùÌá¹©µÄÒÆ¶¯ÖÕ¶ËºÍ»ùÓÚ¸ÃÒÆ¶¯ÖÕ¶ËµÄÇ¶ÈëÊ½°²È«Ä£¿éeSEµÄ·ÃÎÊ·½·¨£¬ÊµÏÖÁËÒ»ÖÖÐÂµÄÔÚ¿ÉÐÅÔËÐÐ»·¾³Ä£¿éTEEÏÂÍ¨¹ýSPI…	Ö§¸¶
´©´÷Éè±¸µÄÖ§¸¶·½·¨ºÍ×°ÖÃ	±±¾©ÊýÂëÊÓÑ¶Ö§¸¶¼¼ÊõÓÐÏÞ¹«Ë¾	2016-11-25	2017-02-15	CN106407785A	Ö÷·ÖÀàºÅ£ºG06F21/32(2013.01)I	ÔÚÉó-ÊµÖÊÉó²éµÄÉúÐ§	100000 ±±¾©ÊÐË³ÒåÇøÎÄ»¯Óª´å±±£¨ÓÎÀÖÔ°£©3´±007ºÅÆ½·¿	±¾·¢Ã÷Ìá¹©ÁËÒ»ÖÖ´©´÷Éè±¸µÄÖ§¸¶·½·¨ºÍ×°ÖÃ£¬Éæ¼°´©´÷Éè±¸µÄ¼¼ÊõÁìÓò£¬°üÀ¨»ñÈ¡ÓÃ»§ÊäÈëµÄÓÃÓÚ¶Ô´©´÷Éè±¸½øÐÐ½âËøµÄ½âËøÐÅÏ¢£»ÅÐ¶Ï½âËøÐÅÏ¢ÓëµÚÒ»Ô¤Éè½âËøÐÅÏ¢ÊÇ·ñÏàÍ¬£»Èç¹ûÅÐ¶Ï³ö½âËøÐÅÏ¢ÓëµÚÒ»Ô¤Éè½âËøÐÅÏ¢ÏàÍ¬£¬ÔòÅÐ¶ÏÊÇ·ñ¼ì²âµ½ÓÃ»§µÄÐÄÂÊÐÅÏ¢£»Èç¹ûÅÐ¶Ï³ö¼ì²âµ½ÓÃ»§µÄÐÄÂÊÐÅÏ¢£¬Ôò¶Ô´©´÷Éè±¸½øÐÐ½âËø²Ù×÷£¬ÒÔÊ¹´©´÷Éè±¸´¦ÓÚ½âËø×´Ì¬£»Í¨¹ý´¦ÓÚ½âËø×´Ì¬µÄ´©´÷Éè±¸Ö´ÐÐÖ§¸¶Ö¸Áî£¬Íê³ÉÖ§¸¶²Ù×÷£¬ÓÉÓÚÏÖÓÐ¼¼ÊõÖÐµÄ´©´÷Éè±¸ÔÚÖ§¸…	°²È«
Ò»ÖÖµ¥»úÄ£Ê½µç×ÓÎÄ¼þ¿ÉÐÅ¹Ü¿Ø·½·¨¼°ÏµÍ³	¹úÍøºÓÄÏÊ¡µçÁ¦¹«Ë¾ÈýÃÅÏ¿ÊÐÉÂÖÝ¹©µç¹«Ë¾	2016-11-28	2017-05-10	CN106650321A	Ö÷·ÖÀàºÅ£ºG06F21/10(2013.01)I	ÔÚÉó-ÊµÖÊÉó²éµÄÉúÐ§	472100 ºÓÄÏÊ¡ÈýÃÅÏ¿ÊÐÎ÷Ê¤ÀûÂ·±±¶ÎÎ÷²à	±¾·¢Ã÷Éæ¼°µ¥»úÄ£Ê½ÏÂµÄ°²È«¹Ü¿ØÁìÓò£¬ÓÈÆäÉæ¼°Ò»ÖÖµ¥»úÄ£Ê½µç×ÓÎÄ¼þ¿ÉÐÅ¹Ü¿Ø·½·¨¼°ÏµÍ³£¬¸ÃÏµÍ³°üÀ¨¼ÓÃÜÄ£¿é¡¢¿ÉÐÅ²ßÂÔÉèÖÃÄ£¿é¡¢ÈËÁ³Ê¶±ðÄ£¿é¡¢Á÷×ª¿ØÖÆÄ£¿éºÍÒì³£¾¯Ê¾Ä£¿é£»±¾·¢Ã÷»¹Ìá¹©ÁËÒ»ÖÖµ¥»úÄ£Ê½µç×ÓÎÄ¼þ¿ÉÐÅ¹Ü¿Ø·½·¨£¬Ëü°üÀ¨ÖÕ¶Ë¼ÆËã»ú¶Ô¸öÈË¼ÆËã»úµÄ°²È«ÊÚÐÅºÍ¿ÉÐÅ¹Ü¿Ø¡£±¾·¢Ã÷ÄÜ¹»ÔÚÖÕ¶Ë¼ÆËã»úÓëÆäËû¸öÈË¼ÆËã»úÖ®¼ä½¨Á¢¿ÉÐÅ°²È«¹Ü¿Ø»·¾³£¬»ñÈ¡¿ÉÐÅÂë£¬ÇÒÈËÁ³ÐÅÏ¢ÓëÈËÁ³Êý¾Ý¿âÆ¥ÅäµÄÓÃ»§¿ÉÒÔÕý³£²é¿´µç×ÓÎÄ¼þ£»»ñÈ¡¿ÉÐ…	°²È«
Ò»ÖÖÖÇÄÜ½âÃÜÏµÍ³¼°·½·¨¡¢ÖÇÄÜ´©´÷Éè±¸ºÍÖÇÄÜÒÆ¶¯ÖÕ¶Ë	¸è¶û¿Æ¼¼ÓÐÏÞ¹«Ë¾	2016-11-29	2017-05-17	CN106682480A	Ö÷·ÖÀàºÅ£ºG06F21/35(2013.01)I	ÔÚÉó-ÊµÖÊÉó²éµÄÉúÐ§	266104 É½¶«Ê¡ÇàµºÊÐáÀÉ½Çø±±Õ¬½ÖµÀÍ¶×Ê·þÎñÖÐÐÄ308ÊÒ	±¾·¢Ã÷¹«¿ªÁËÒ»ÖÖÖÇÄÜ½âÃÜÏµÍ³¼°·½·¨¡¢ÖÇÄÜ´©´÷Éè±¸ºÍÖÇÄÜÒÆ¶¯ÖÕ¶Ë£¬ÖÇÄÜÒÆ¶¯ÖÕ¶Ë£¬ÓÃÓÚÓëÖÇÄÜ´©´÷Éè±¸½¨Á¢ÎÞÏßÍ¨ÐÅÁ¬½Ó£¬¶ÁÈ¡ÖÇÄÜ´©´÷Éè±¸µÄIDºÅÂë±£´æÖÁ×ÔÉí£¬²¢½ÓÊÕÓÃ»§ÊäÈëµÄ½âËøÃÜÂë»òÖ§¸¶ÃÜÂë±£´æÖÁ×ÔÉí£¬²¢½«½âËøÃÜÂë»òÖ§¸¶ÃÜÂë·¢ËÍÖÁÖÇÄÜ´©´÷Éè±¸±£´æ£»ÒÔ¼°£¬ÔÚºóÐøÐèÒª½âËø»òÖ§¸¶Ê±£¬ÓëÖÇÄÜ´©´÷Éè±¸½¨Á¢ÎÞÏßÍ¨ÐÅÁ¬½Ó£¬²¢¶ÁÈ¡ÖÇÄÜ´©´÷Éè±¸µÄIDºÅÂë£¬ÔÚÓë×ÔÉí´æ´¢µÄÖÇÄÜ´©´÷Éè±¸µÄIDºÅÂëÒ»ÖÂÊ±£¬ÏòÖÇÄÜ´©´÷Éè±¸·¢ËÍÃÜÂëÇëÇ…	°²È«
½ðÈÚÓ¦ÓÃµÄ·çÏÕÆÀ¹À·½·¨¼°×°ÖÃ	ÕÐÉÌÒøÐÐ¹É·ÝÓÐÏÞ¹«Ë¾	2016-12-05	2017-09-01	CN107122666A	Ö÷·ÖÀàºÅ£ºG06F21/57(2013.01)I	ÔÚÉó-ÊµÖÊÉó²éµÄÉúÐ§	518000 ¹ã¶«Ê¡ÉîÛÚÊÐÉîÄÏ´óµÀ7088ÕÐÉÌÒøÐÐ´óÏÃ	±¾·¢Ã÷¹«¿ªÁËÒ»ÖÖ½ðÈÚÓ¦ÓÃµÄ·çÏÕÆÀ¹À·½·¨£¬¸Ã·½·¨°üÀ¨£º»ñÈ¡´ýÆÀ¹ÀµÄÒÆ¶¯½ðÈÚÓ¦ÓÃ³ÌÐòÎÄ¼þ£»°´ÕÕÔ¤ÉèµÄ·çÏÕÆÀ¹ÀÏî£¬¶ÔËùÊö´ýÆÀ¹ÀµÄÒÆ¶¯½ðÈÚÓ¦ÓÃ³ÌÐòÎÄ¼þ½øÐÐ·çÏÕÆÀ¹À£¬ËùÊö·çÏÕÆÀ¹ÀÏî°üÀ¨ÄæÏò·çÏÕÆÀ¹À¡¢´úÂë·çÏÕÆÀ¹ÀºÍÒµÎñ·çÏÕÆÀ¹ÀÖÐµÄÒ»¸ö»ò¶à¸ö£»×ÛºÏ¸÷¸ö·çÏÕÆÀ¹ÀÏîµÄ·çÏÕÆÀ¹À½á¹û£¬µÃµ½ËùÊö´ýÆÀ¹ÀµÄÒÆ¶¯½ðÈÚÓ¦ÓÃ³ÌÐòÎÄ¼þµÄ·çÏÕÆÀ¹À½á¹û¡£±¾·¢Ã÷»¹¹«¿ªÁËÒ»ÖÖ½ðÈÚÓ¦ÓÃµÄ·çÏÕÆÀ¹À×°ÖÃ¡£±¾·¢Ã÷ÄÜ¹»ÊµÏÖ¶ÔÒÆ¶¯½ðÈÚÓ¦ÓÃ½øÐÐ×ÛºÏÈ«Ãæµ…	Êý¾Ý·ÖÎö
Ò»ÖÖ»ùÓÚÊÖ»úÉãÏñÍ·µÄºçÄ¤Éí·ÝÊ¶±ð·½·¨¼°ÏµÍ³	ÐÅÀû¹âµç¹É·ÝÓÐÏÞ¹«Ë¾	2016-12-07	2017-05-31	CN106778170A	Ö÷·ÖÀàºÅ£ºG06F21/32(2013.01)I	ÔÚÉó-ÊµÖÊÉó²éµÄÉúÐ§	516600 ¹ã¶«Ê¡ÉÇÎ²ÊÐÇø¹¤Òµ´óµÀÐÅÀû¹¤Òµ³ÇÒ»ÇøµÚ15¶°	±¾ÉêÇë¹«¿ªÁËÒ»ÖÖ»ùÓÚÊÖ»úÉãÏñÍ·µÄºçÄ¤Éí·ÝÊ¶±ð·½·¨£¬°üÀ¨£ºÍ¨¹ýÊÖ»úÉãÏñÍ·»ñÈ¡ÓÃ»§ÈËÑÛµÄºçÄ¤Í¼Ïñ£»¸ù¾ÝËùÊöºçÄ¤Í¼ÏñÌáÈ¡ÌØÕ÷ÐÅÏ¢£¬½«ËùÊöÌØÕ÷ÐÅÏ¢ÓëÊÖ»úÖÐÔ¤´æµÄÓÃ»§ºçÄ¤ÐÅÏ¢½øÐÐ¶Ô±È£»ÈôËùÊöÌØÕ÷ÐÅÏ¢ÓëËùÊöÓÃ»§ºçÄ¤ÐÅÏ¢ÏàÒ»ÖÂ£¬ÔòÈ·ÈÏËùÊöÓÃ»§µÄÉí·ÝÕýÈ·¡£ÄÜ¹»ÓÐÐ§²¶×½ÈËÑÛºçÄ¤£¬½«ºçÄ¤×÷ÎªÉí·ÝÊ¶±ðÆ¾Ö¤£¬¼ÓÇ¿ÐÅÏ¢±£»¤µÄ°²È«ÐÔ¡£±¾ÉêÇë»¹Ìá¹©Ò»ÖÖ»ùÓÚÊÖ»úÉãÏñÍ·µÄºçÄ¤Éí·ÝÊ¶±ðÏµÍ³£¬¾ßÓÐÉÏÊöÐ§¹û¡£	°²È«
ÒµÎñÇëÇó·½·¨¡¢ÒµÎñ°ìÀíºÅÂëµÄÑéÖ¤·½·¨¼°ÆäÖÕ¶Ë	ÉîÛÚÊÐ½ðÁ¢Í¨ÐÅÉè±¸ÓÐÏÞ¹«Ë¾	2016-12-09	2017-06-13	CN106851613A	Ö÷·ÖÀàºÅ£ºH04W8/18(2009.01)I	ÔÚÉó-ÊµÖÊÉó²éµÄÉúÐ§	518040 ¹ã¶«Ê¡ÉîÛÚÊÐ¸£ÌïÇøÉîÄÏ´óµÀ7028ºÅÊ±´ú¿Æ¼¼´óÏÃ¶«×ù21Â¥	±¾·¢Ã÷ÊµÊ©Àý¹«¿ªÁËÒ»ÖÖÒµÎñÇëÇó·½·¨¡¢ÒµÎñ°ìÀíºÅÂëµÄÑéÖ¤·½·¨¼°ÆäÖÕ¶Ë£¬ÆäÖÐÒµÎñÇëÇó·½·¨°üÀ¨£º»ñÈ¡ÓÃÓÚÇëÇó°ìÀíÒµÎñµÄÒµÎñ°ìÀíºÅÂë£»Í¨¹ýÖÕ¶ËµÄÉí·ÝÊ¶±ð¿¨ÒÔ¶ÌÐÅµÄÐÎÊ½ÏòÑéÖ¤ÖÕ¶Ë·¢ËÍÉí·ÝÑéÖ¤ÇëÇó£¬ÆäÖÐ£¬ËùÊöÉí·ÝÑéÖ¤ÇëÇó°üÀ¨ËùÊöÒµÎñ°ìÀíºÅÂë£»½ÓÊÕËùÊöÑéÖ¤ÖÕ¶Ë·µ»ØµÄÑéÖ¤½á¹û£»¸ù¾ÝËùÊöÑéÖ¤½á¹ûÈ·¶¨ÊÇ·ñ¼ÌÐøÖ´ÐÐÒµÎñÇëÇó´¦ÀíÁ÷³Ì¡£±¾·¢Ã÷ÊµÊ©Àý¿ÉÒÔÌá¸ßÒµÎñ°ìÀíµÄ°²È«ÐÔ£¬¼õÉÙÓÃ»§µÄµç»°ºÅÂë±»ÆäËûÈË·Ç·¨µÁÓÃµÄ·çÏÕ£¬¿Ë·þÁËÏ…	°²È«
°²È«Ö§¸¶×°ÖÃ¼°Æä°²È«Ö§¸¶·½·¨	ÈÊ±¦µçÄÔ¹¤Òµ¹É·ÝÓÐÏÞ¹«Ë¾	2016-12-13	2017-07-28	CN106991343A	Ö÷·ÖÀàºÅ£ºG06F21/84(2013.01)I	ÔÚÉó-ÊµÖÊÉó²éµÄÉúÐ§	ÖÐ¹úÌ¨ÍåÌ¨±±ÊÐÄÚºþÇøÈð¹âÂ·581ºÅ	±¾·¢Ã÷Ìá¹©Ò»ÖÖ°²È«Ö§¸¶×°ÖÃ¼°Æä°²È«Ö§¸¶·½·¨¡£°²È«Ö§¸¶×°ÖÃÊÇÌá¹©Ò»µÚÒ»Ä£Ê½¼°Ò»µÚ¶þÄ£Ê½£¬ÆäÖÐµÚ¶þÄ£Ê½ÎªÔÚÒ»Ö§¸¶³ÌÐòÊ±½ÓÊÕÒ»Ö§¸¶¼þµÄÊý¾ÝÒÔ½øÐÐ°²È«Ö§¸¶µÄÄ£Ê½¡£°²È«Ö§¸¶×°ÖÃ°üÀ¨Ò»´¥¿ØÆÁÄ»×é¡¢Ò»Ö§¸¶µ¥Ôª¡¢Ò»ÖÐÑë´¦Àíµ¥Ôª¼°Ò»°²È«Î¢´¦Àíµ¥Ôª¡£´¥¿ØÆÁÄ»×éÊÇ¹©ÏÔÊ¾Ò»²Ù×÷½éÃæ½Ó¿Ú¼°Ò»°²È«Ö§¸¶½éÃæ£¬ÖÐÑë´¦Àíµ¥ÔªÔÚµÚÒ»Ä£Ê½ÏÂ£¬Í¨¹ý²Ù×÷½éÃæ½ÓÊÕÒ»µÚÒ»²Ù×÷Ö¸Áî£¬µ±½øÈëµÚ¶þÄ£Ê½Ê±£¬°²È«Î¢´¦Àíµ¥ÔªÓÉÖ§¸¶µ¥ÔªÈ¡µÃÖ§¸¶¼þµÄÊý¾Ý²¢Í…	°²È«
Ò»ÖÖÍ¼Ïñ´¦ÀíÉè±¸½âËø·½·¨¡¢Í¼Ïñ´¦ÀíÉè±¸¼°ÏµÍ³	ÓàÈÊÖ²	2016-12-15	2017-05-31	CN106778135A	Ö÷·ÖÀàºÅ£ºG06F21/31(2013.01)I	ÔÚÉó-¹«¿ª	201204 ÉÏº£ÊÐÆÖ¶«ÐÂÇø»¨Ä¾Â·718Åª5-902ÊÒ	±¾·¢Ã÷ÊµÊ©ÀýÌá¹©Ò»ÖÖÍ¼Ïñ´¦ÀíÉè±¸½âËø·½·¨¡¢Í¼Ïñ´¦ÀíÉè±¸¼°ÏµÍ³£¬·½·¨Îª£ºÍ¼Ïñ´¦ÀíÉè±¸ÉÏÔ¤´æ×ÅÒ»´ÎÐÔÃÜÂëÁÐ±í£¬¸ÃÁÐ±í°üº¬¶à¸öÃÜÂë£»È»ºó»ñÈ¡ÓÃ»§ÊäÈëµÄÃÜÂë£»¸ù¾ÝÃÜÂëÁÐ±íÅÐ¶ÏÓÃ»§ÊäÈëµÄÃÜÂëÊÇ·ñÓÐÐ§£¬ÓÐÐ§Ôò½âËøÉè±¸£¬²¢ÇÒÊ¹¸Õ²ÅÊäÈëµÄÃÜÂë±êÎªÎÞÐ§£¬·ÀÖ¹ÔÙ´ÎÊ¹ÓÃ£¬ÌåÏÖÁËÒ»´ÎÐÔµÄÌØµã£¬»¹ÄÜ¶ÔÓÃ»§µÄÊµ¼Ê¹¤×÷Ò³Êý½øÐÐ¼ÆÊý£¬Èô´ïµ½Æä×î¶àÔÊÐí¹¤×÷Ò³Êý£¬ÔòËø¶¨¡£ÏµÍ³²»ÒªÇóÍ¼Ïñ´¦ÀíÉè±¸ÁªÍøÔÚÏß£¬²»ÐèÒªºó¶Ë·þÎñÆ÷ÊµÊ±¿ØÖÆÍ¼Ïñ´…	°²È«
»ùÓÚ¶þÎ¬ÂëÖ§¸¶µÄÒÆ¶¯Ö§¸¶ÖÕ¶Ë¡¢Ö§¸¶·½·¨ºÍÖ§¸¶ÏµÍ³	ÖÐ¹úÒøÁª¹É·ÝÓÐÏÞ¹«Ë¾	2016-12-16	2017-07-18	CN106960338A	Ö÷·ÖÀàºÅ£ºG06Q20/32(2012.01)I	ÔÚÉó-ÊµÖÊÉó²éµÄÉúÐ§	200135 ÉÏº£ÊÐÆÖ¶«ÐÂÇøº¬Ð¦Â·36ºÅÒøÁª´óÏÃ	±¾·¢Ã÷Ìá¹©Ò»ÖÖ»ùÓÚ¶þÎ¬ÂëÖ§¸¶µÄÒÆ¶¯Ö§¸¶ÖÕ¶Ë¡¢Ö§¸¶·½·¨ºÍÖ§¸¶ÏµÍ³£¬ÊôÓÚÒÆ¶¯Ö§¸¶¼¼ÊõÁìÓò¡£±¾·¢Ã÷µÄÒÆ¶¯Ö§¸¶ÖÕ¶Ë°üÀ¨Æä±»ÅäÖÃÎªÄÜ¹»Í¨¹ý²Ù×÷ÒÆ¶¯Ö§¸¶ÖÕ¶ËËùÏÔÊ¾µÄ¶þÎ¬ÂëÀ´Ê¶±ð¸Ã¶þÎ¬ÂëµÄ¶þÎ¬ÂëÊ¶±ðÄ£¿é¡£±¾·¢Ã÷µÄÒÆ¶¯Ö§¸¶ÖÕ¶Ë½µµÍÁËÓ²¼þÒªÇó£¬½â³ýÁËÉ¨Âë»·¾³¡¢É¨ÃèÓ²¼þ¡¢É¨ÃèµØµãµÈ¿Í¹ÛÒòËØ¶ÔÉ¨ÃèÖ§¸¶ÒµÎñµÄÊø¸¿¡£	Ö§¸¶
·ÀÓùÃÜÂëÇÔÈ¡µÄ·½·¨¼°×°ÖÃ	±±¾©Ð¡Ã×ÒÆ¶¯Èí¼þÓÐÏÞ¹«Ë¾	2016-12-19	2018-06-26	CN108205617A	Ö÷·ÖÀàºÅ£ºG06F21/31(2013.01)I	ÔÚÉó-ÊµÖÊÉó²éµÄÉúÐ§	100085 ±±¾©ÊÐº£µíÇøÇåºÓÖÐ½Ö68ºÅ»ªÈóÎå²Ê³Ç¹ºÎïÖÐÐÄ¶þÆÚ9²ã01·¿¼ä	±¾¹«¿ªÊÇ¹ØÓÚ·ÀÓùÃÜÂëÇÔÈ¡µÄ·½·¨¼°×°ÖÃ¡£¸Ã·½·¨°üÀ¨£º¸ù¾ÝÖÕ¶ËÏµÍ³µÄÈÕÖ¾ÐÅÏ¢£¬È·¶¨ÃÜÂëÊäÈëÊÂ¼þ£»»ñÈ¡ËùÊöÃÜÂëÊäÈëÊÂ¼þÖÐ¶ÔÓ¦µÄÊäÈë´¥ÃþµãµÄ·ÀÓùÏñËØµãÊý¾ÝÐÅÏ¢£¬ÆäÖÐ£¬ËùÊö·ÀÓùÏñËØµãÊý¾ÝÐÅÏ¢ÊÇ¸ù¾ÝÔ¤ÉèµÄ¼ÓÃÜ²ßÂÔ£¬¶ÔËùÊöÊäÈë´¥ÃþµãµÄÏñËØµãÊý¾ÝÐÅÏ¢½øÐÐ¼ÓÃÜºóÉú³ÉµÄ£»¸ù¾ÝËùÊö·ÀÓùÏñËØµãÊý¾ÝÐÅÏ¢»ñµÃ·ÀÓùÃÜÂë£¬ÆäÖÐ£¬ËùÊö·ÀÓùÃÜÂëÓëËùÊöÃÜÂëÊäÈëÊÂ¼þÖÐµÄÊäÈëÃÜÂë²»Æ¥Åä£¬·ÀÖ¹ËùÊöÊäÈëÃÜÂë±»ÇÔÈ¡¡£¸Ã¼¼Êõ·½°¸ÖÐ£¬Ö»ÄÜ»ñÈ¡¼ÓÃÜº…	°²È«
Êý¾ÝÒøÐÐµÄÊý¾Ý½»»¥·½·¨ºÍÏµÍ³	ÖÐ¹ú¿ÆÑ§ÔºËÕÖÝÉúÎïÒ½Ñ§¹¤³Ì¼¼ÊõÑÐ¾¿Ëù	2016-12-20	2017-08-18	CN107066892A	Ö÷·ÖÀàºÅ£ºG06F21/62(2013.01)I	ÔÚÉó-ÊµÖÊÉó²éµÄÉúÐ§	215163 ½­ËÕÊ¡ËÕÖÝÊÐ¸ßÐÂÇø¿Æ¼¼³Ç¿ÆÁéÂ·88ºÅ	±¾·¢Ã÷¹«¿ªÁËÒ»ÖÖÊý¾ÝÒøÐÐµÄÊý¾Ý½»»¥·½·¨ºÍÏµÍ³£¬ËùÊö·½·¨°üÀ¨£ºS1¡¢½ÓÊÕÓÃ»§Éè±¸ÊäÈëµÄÊý¾ÝÒøÐÐÕËºÅ¼°µÇÂ¼ÃÜÂë£¬¾­ÑéÖ¤µÇÂ¼³É¹¦ºó»ñÈ¡ÓÃ»§Éè±¸µÄ±êÊ¶µØÖ·ÐÅÏ¢£»S2¡¢½ÓÊÕËùÊöÓÃ»§Éè±¸ÊäÈëµÄ·ÃÎÊÇëÇó£¬ËùÊö·ÃÎÊÇëÇó°üº¬´ý·ÃÎÊµÄÊý¾ÝµÄ±êÊ¶£»S3¡¢¼ì²âËùÊö±êÊ¶µØÖ·ÐÅÏ¢ÓëËùÊö±êÊ¶ÊÇ·ñ°ó¶¨£¬Èô·ñ£¬ÔòÖ´ÐÐ²½ÖèS4£¬ÈôÊÇ£¬ÔòÖ´ÐÐ²½ÖèS5£»S4¡¢ÏòÓÃ»§Éè±¸·¢ËÍ°²È«ÎÊÌâ£¬ÈôËùÊöÓÃ»§Éè±¸ÊäÈëµÄ´ð°¸ÕýÈ·£¬ÔòÖ´ÐÐ²½ÖèS5£»S5¡¢¸³ÓèËùÊöÓÃ»§Éè±¸·…	°²È«
½µµÍÊý¾ÝÒøÐÐµÄÊý¾ÝÇÔÈ¡·çÏÕµÄ·½·¨ºÍÏµÍ³	ÖÐ¹ú¿ÆÑ§ÔºËÕÖÝÉúÎïÒ½Ñ§¹¤³Ì¼¼ÊõÑÐ¾¿Ëù	2016-12-20	2017-05-31	CN106790056A	Ö÷·ÖÀàºÅ£ºH04L29/06(2006.01)I	ÔÚÉó-ÊµÖÊÉó²éµÄÉúÐ§	215163 ½­ËÕÊ¡ËÕÖÝÊÐ¸ßÐÂÇø¿Æ¼¼³Ç¿ÆÁéÂ·88ºÅ	±¾·¢Ã÷¹«¿ªÁËÒ»ÖÖ½µµÍÊý¾ÝÒøÐÐµÄÊý¾ÝÇÔÈ¡·çÏÕµÄ·½·¨ºÍÏµÍ³£¬ËùÊö·½·¨°üÀ¨£ºS1¡¢¿Í»§¶Ë½«ËùÊöÊý¾ÝÒøÐÐÕË»§¼°µÇÂ½ÃÜÂë´ò°ü²¢¼ÓÃÜµÃµ½µÄµÚÒ»¼ÓÃÜÎÄ¼þ·¢ËÍÖÁ·þÎñÆ÷£¬ÑéÖ¤µÇÂ¼³É¹¦ºó£¬¿Í»§¶Ë»ñÈ¡ÓÃ»§Éè±¸µÄ±êÊ¶µØÖ·ÐÅÏ¢£»S2¡¢¿Í»§¶Ë½«ËùÊö±êÊ¶µØÖ·ºÍ·ÃÎÊÇëÇó´ò°ü²¢¼ÓÃÜµÃµ½µÄµÚ¶þ¼ÓÃÜÎÄ¼þ·¢ËÍÖÁ·þÎñÆ÷£»S3¡¢ËùÊö·þÎñÆ÷½âÃÜ²¢½âÑ¹ËùÊöµÚ¶þ¼ÓÃÜÎÄ¼þ£¬¼ì²âËùÊö±êÊ¶µØÖ·ÐÅÏ¢ÓëËùÊö±êÊ¶ÊÇ·ñ°ó¶¨£¬Èô·ñ£¬ÔòÖ´ÐÐ²½ÖèS4£¬ÈôÊÇ£¬ÔòÖ´ÐÐ²½ÖèS5£»S…	°²È«
Ò»ÖÖ×ÛºÏÐÅÏ¢´¦Àí·½·¨	³¤É³ÐÞºãÐÅÏ¢¿Æ¼¼ÓÐÏÞ¹«Ë¾	2016-12-25	2017-04-26	CN106599741A	Ö÷·ÖÀàºÅ£ºG06K1/12(2006.01)I	ÔÚÉó-ÊµÖÊÉó²éµÄÉúÐ§	410000 ºþÄÏÊ¡³¤É³ÊÐ³¤É³¸ßÐÂ¿ª·¢ÇøÂ´ÁúÂ·199ºÅÂ´¹ÈÉÌÎñÖÐÐÄA¶°307·¿¿¨-1066	±¾·¢Ã÷¹«¿ªÁËÒ»ÖÖ×ÛºÏÐÅÏ¢´¦Àí·½·¨£¬ÔÚÖ÷»ú±¾Ìå(1)ÉÏÉèÖÃÍâÉè£»ËùÊöµÄÍâÉè°üÀ¨Ö¤¼þ¶ÁÈ¡Æ÷(5)ºÍRFID¿¨Æ¬¶ÁÐ´Æ÷(7)£»Ö÷»ú±¾ÌåÍ¨¹ýËø½ô×°ÖÃ¹Ì¶¨ÍâÉè£¬ÍâÉèÓëÖ÷»ú±¾ÌåÍ¨ÐÅÁ¬½Ó£»°üÀ¨ÒÔÏÂ²½Öè£º²½Öè1£ºÖ¤¼þÐÅÏ¢¶ÁÈ¡£»Ö÷»ú±¾ÌåÍ¨¹ýÖ¤¼þ¶ÁÈ¡Æ÷»ñÈ¡Ö¤¼þÐÅÏ¢£»²½Öè2£ºÐ´¿¨²Ù×÷£»Ö÷»ú±¾ÌåÍ¨¹ýRFID¿¨Æ¬¶ÁÐ´Æ÷¶ÔRFID¿¨Ð´ÈëÐÅÏ¢¡£ËùÊöµÄÍâÉè»¹°üÀ¨Ö§¸¶Ä£¿é£»ËùÊöµÄÖ§¸¶Ä£¿éÎªÒøÐÐ¿¨ÖÕ¶ËºÍÉ¨ÂëÆ÷ÖÐµÄÖÁÉÙÒ»ÖÖ£»ÔÚÐ´¿¨²Ù×÷²½ÖèÖ®Ç°»òÖ®ºó»¹ÉèÓÐÖ§…	°²È«
Ò»ÖÖÊµÊ±·¢¿¨ÏµÍ³	º½ÌìÐÅÏ¢¹É·ÝÓÐÏÞ¹«Ë¾	2016-12-26	2018-07-03	CN108241880A	Ö÷·ÖÀàºÅ£ºG06K17/00(2006.01)I	ÔÚÉó-ÊµÖÊÉó²éµÄÉúÐ§	100093 ±±¾©ÊÐº£µíÇøÐÓÊ¯¿ÚÂ·¼×18ºÅ	±¾·¢Ã÷ÊµÊ©ÀýÌá¹©ÁËÒ»ÖÖÊµÊ±·¢¿¨ÏµÍ³£¬°üÀ¨ÐÅÏ¢²É¼¯Éè±¸£¬ÓÃÓÚ²É¼¯µ±Ç°ÓÃ»§µÄ¸öÈËÐÅÏ¢£¬¸öÈËÐÅÏ¢°üÀ¨Éí·ÝÐÅÏ¢ÓëÉúÎïÌØÕ÷ÐÅÏ¢£»ÐÅÏ¢ÑéÖ¤Éè±¸£¬ÓÃÓÚÑéÖ¤Ëù²É¼¯µÄÉí·ÝÐÅÏ¢ÓëËù²É¼¯µÄÉúÎïÌØÕ÷ÐÅÏ¢ÊÇ·ñÏà·û£»¼ÓÃÜÉè±¸£¬ÓÃÓÚ¼ÓÃÜÉí·ÝÐÅÏ¢ÓëÉúÎïÌØÕ÷ÐÅÏ¢Ïà·ûµÄ¸öÈËÐÅÏ¢£¬²¢½«¼ÓÃÜºóµÄ¸öÈËÐÅÏ¢·¢ËÍ¸ø·¢¿¨Éè±¸£»·¢¿¨Éè±¸£¬ÓÃÓÚ¸ù¾Ý¼ÓÃÜÉè±¸·¢ËÍµÄ¸öÈËÐÅÏ¢£¬ÖÆ×÷²¢Êä³öÖ¤¿¨¡£±¾·¢Ã÷µÄÊµÊ©ÀýÌá¹©ÁËÒ»ÖÖÊµÊ±·¢¿¨ÏµÍ³£¬ÊµÏÖÁËÊµÊ±×ÔÖúÏòÓÃ»§·¢Ð…	°²È«
Ò»ÖÖ»ùÓÚ½ðÈÚIC¿¨µÄÒÆ¶¯ÖÕ¶ËÓ¦ÓÃÓÃ»§Éí·ÝÈÏÖ¤·½·¨	³É¶¼ÖÐÁªÐÅÍ¨¿Æ¼¼¹É·ÝÓÐÏÞ¹«Ë¾	2016-12-27	2018-07-03	CN108241800A	Ö÷·ÖÀàºÅ£ºG06F21/34(2013.01)I	ÔÚÉó-¹«¿ª	610041 ËÄ´¨Ê¡³É¶¼ÊÐ¸ßÐÂÇøÌì¸®´óµÀÖÐ¶Î1268ºÅÈí¼þÔ°EÇøE3¶°6²ã1-7ºÅ	±¾·¢Ã÷¹«¿ªÁËÒ»ÖÖ»ùÓÚ½ðÈÚIC¿¨µÄÒÆ¶¯ÖÕ¶ËÓ¦ÓÃÓÃ»§Éí·ÝÈÏÖ¤·½·¨£¬ÔÚÓÃ»§Éí·Ý×¢²áÊ±£¬Í¨¹ý½ðÈÚIC¿¨ÐÅÏ¢½øÐÐÑéÖ¤×¢²á£¬Èç¹ûÑéÖ¤Í¨¹ýÔò×¢²á³É¹¦£¬·ñÔò×¢²áÊ§°Ü£»ÔÚÒÆ¶¯ÖÕ¶ËÓ¦ÓÃÐèÒªÓÃ»§Éí·ÝÈÏÖ¤Ê±£¬Ò²Í¨¹ý½ðÈÚIC¿¨ÐÅÏ¢½øÐÐÉí·ÝÈÏÖ¤¡£±¾·¢Ã÷ÀûÓÃ½ðÈÚIC¿¨ÐÅÏ¢À´½øÐÐÒÆ¶¯ÖÕ¶ËÓ¦ÓÃµÄÓÃ»§Éí·ÝÈÏÖ¤£¬ÀûÓÃ½ðÈÚIC¿¨ÐÅÏ¢µÄ°²È«ÐÔ£¬±£Ö¤Ö»ÓÐºÏ·¨Ó¦ÓÃ²ÅÄÜµÇÂ¼Ó¦ÓÃ£¬´Ó¶øÌá¸ßÒÆ¶¯ÖÕ¶ËÓ¦ÓÃÓÃ»§Éí·ÝÈÏÖ¤µÄ°²È«ÐÔ¡£	°²È«
½ðÈÚÕË»§°²È«¹ÜÀí·½·¨ºÍ×°ÖÃ	Æ½°²¿Æ¼¼£¨ÉîÛÚ£©ÓÐÏÞ¹«Ë¾	2016-12-28	2018-03-09	CN107784225A	Ö÷·ÖÀàºÅ£ºG06F21/46(2013.01)I	ÔÚÉó-ÊµÖÊÉó²éµÄÉúÐ§	518052 ¹ã¶«Ê¡ÉîÛÚÊÐ¸£ÌïÇø°ËØÔÁë°ËØÔÈýÂ·Æ½°²´óÏÃÁùÂ¥	±¾·¢Ã÷Éæ¼°Ò»ÖÖ½ðÈÚÕË»§°²È«¹ÜÀí·½·¨ºÍ×°ÖÃ£¬¸Ã·½·¨°üÀ¨£º½ÓÊÕÊäÈëµÄ½ðÈÚÕË»§±êÊ¶ºÍÏàÓ¦µÄ½ðÈÚÕË»§ÃÜÂë£»µ±½ðÈÚÕË»§ÃÜÂëÓë½ðÈÚÕË»§±êÊ¶¶ÔÓ¦µÄµÚÒ»ÃÜÂëÒ»ÖÂÊ±£¬Êä³öÓë½ðÈÚÕË»§±êÊ¶¶ÔÓ¦µÄÕý³£ÕË»§ÐÅÏ¢£»µ±½ðÈÚÕË»§ÃÜÂëÓë½ðÈÚÕË»§±êÊ¶¶ÔÓ¦µÄµÚ¶þÃÜÂëÒ»ÖÂÊ±£¬»ñÈ¡ÉÏ´ÎÊ¹ÓÃ½ðÈÚÕË»§±êÊ¶ºÍµÚÒ»ÃÜÂëµÇÂ¼µÄÊ±¼äºÍµ±Ç°Ê±¼ä£»È·¶¨ÉÏ´ÎµÇÂ¼µÄÊ±¼äÓëµ±Ç°Ê±¼äµÄÊ±¼ä¼ä¸ô£»ÈôÊ±¼ä¼ä¸ô³¬¹ýÔ¤ÉèÊ±¼ä¼ä¸ô£¬Ôò¸ù¾ÝÊ±¼ä¼ä¸ôÈ·¶¨´ýÊä³öµÄ°²È«ÕË»§ÐÅÏ¢£…	°²È«
»ùÓÚ±£ÏÕÒµÎñµÄµç»°½»»¥·½·¨ºÍ×°ÖÃ	Æ½°²¿Æ¼¼£¨ÉîÛÚ£©ÓÐÏÞ¹«Ë¾	2016-12-28	2018-07-06	CN108259681A	Ö÷·ÖÀàºÅ£ºH04M3/42(2006.01)I	ÔÚÉó-ÊµÖÊÉó²éµÄÉúÐ§	518052 ¹ã¶«Ê¡ÉîÛÚÊÐ¸£ÌïÇø°ËØÔÁë°ËØÔÈýÂ·Æ½°²´óÏÃÁùÂ¥	±¾·¢Ã÷Éæ¼°Ò»ÖÖ»ùÓÚ±£ÏÕÒµÎñµÄµç»°½»»¥·½·¨ºÍ×°ÖÃ¡£¸Ã·½·¨°üÀ¨£º½ÓÊÕÓÃ»§ÖÕ¶Ë·¢ËÍµÄµç»°×ÉÑ¯ÇëÇó£¬µç»°×ÉÑ¯ÇëÇóÖÐÐ¯´øÓÐÀ´µçºÅÂë£»È·¶¨ÓëÀ´µçºÅÂë¶ÔÓ¦µÄÓÃ»§¼°ÓëÓÃ»§Ïà¹ØµÄ±£ÏÕÒµÎñÀàÐÍ¼°Æ¥ÅäµÄ±£µ¥£»µ±±£µ¥µÄ±£µ¥ÊýÁ¿²»´óÓÚÔ¤ÉèÊýÁ¿Ê±£¬²¥±¨±£µ¥µÄµ¥ºÅ£¬ÒÔÊ¹ÓÃ»§Í¨¹ýÓÃ»§ÖÕ¶ËÑ¡¶¨´ý´¦Àí±£µ¥£»µ±±£µ¥µÄ±£µ¥ÊýÁ¿´óÓÚÔ¤ÉèÊýÁ¿Ê±£¬ÏòÓÃ»§ÖÕ¶Ë·¢ËÍ±£µ¥ÐÅÏ¢Ñ¡ÔñµÄÌáÊ¾ÐÅÏ¢£¬½ÓÊÕÓÃ»§ÖÕ¶Ë·¢ËÍµÄ¶ÔÆäÖÐÒ»¸ö±£µ¥µÄÑ¡ÔñÐÅÏ¢£¬¸ù¾ÝÑ¡ÔñÐÅÏ¢½…	±£ÏÕ
Ò»ÖÖ»ùÓÚIC¿¨µÄÖ¸ÎÆÐÅÏ¢¼ÓÃÜºÍ½âÃÜ·½·¨	´óÌÆµçÐÅ£¨³É¶¼£©ÐÅÏ¢¼¼ÊõÓÐÏÞ¹«Ë¾	2016-12-28	2017-05-17	CN106682475A	Ö÷·ÖÀàºÅ£ºG06F21/32(2013.01)I	ÔÚÉó-ÊµÖÊÉó²éµÄÉúÐ§	610000 ËÄ´¨Ê¡³É¶¼ÊÐÒæÖÝ´óµÀ1800ºÅÌì¸®Èí¼þÔ°GÇø4¶°	±¾·¢Ã÷Éæ¼°Ö¸ÎÆÐÅÏ¢¼ÓÃÜ¼¼ÊõÁìÓò£¬¾ßÌåÊÇÒ»ÖÖ»ùÓÚIC¿¨µÄÖ¸ÎÆÐÅÏ¢¼ÓÃÜºÍ½âÃÜ·½·¨£¬¼ÓÃÜÊ±£¬POS»ú´Ó²É¼¯µ½µÄÖ¸ÎÆÐÅÏ¢ÖÐÌáÈ¡Ö¸ÎÆÌØÕ÷Êý¾Ý£¬ÔÙÒÔÃ÷ÎÄÐÎÊ½´«¸øIC¿¨£¬IC¿¨ÔÙ½«¸ÃÊý¾ÝÌî³äÎªÖ¸ÎÆÐÅÏ¢Ã÷ÎÄÄ£°å£¬²¢ÒÔIC¿¨Ð¾Æ¬ÐòÁÐºÅÎªÃÜÔ¿¶ÔÖ¸ÎÆÐÅÏ¢Ã÷ÎÄÄ£°å½øÐÐ¼ÓÃÜÉú³ÉÃÜÎÄÄ£°å´æÓÚ¿¨ÖÐ£¬POSÔÙ»ú¸ù¾ÝÐ¾Æ¬ÐòÁÐºÅÏòIC¿¨·¢·ÅÉí·ÝÈÏÖ¤Âë´æÓÚIC¿¨ÖÐ£»½âÃÜÊ±£¬POS»úÏòIC¿¨·¢ËÍÉí·ÝÈ·ÈÏÇëÇó£¬IC¿¨½«Éí·ÝÈÏÖ¤Âë·¢ËÍ¸øPOS»ú£¬POS»úÈÏÖ¤Éí·ÝÈÏÖ¤ÂëµÄ…	°²È«
Ò»ÖÖÑÓÊ±ËøÖ¹Ð¾Æ¬µÄ·½·¨	±±¾©ÖÐµç»ª´óµç×ÓÉè¼ÆÓÐÏÞÔðÈÎ¹«Ë¾	2016-12-29	2018-07-06	CN108256319A	Ö÷·ÖÀàºÅ£ºG06F21/55(2013.01)I	ÔÚÉó-ÊµÖÊÉó²éµÄÉúÐ§	102209 ±±¾©ÊÐ²ýÆ½Çø±±Æß¼ÒÕòÎ´À´¿Æ¼¼³ÇÄÏÇøÖÐ¹úµç×ÓÍøÂç°²È«ºÍÐÅÏ¢»¯²úÒµ»ùµØC¶°	±¾·¢Ã÷Ìá³öÒ»ÖÖÑÓÊ±ËøÖ¹Ð¾Æ¬µÄ·½·¨¡£Ó¦ÓÃÔÚÓÐ°²È«ÒªÇóµÄ¸÷ÖÖ°²È«Ð¾Æ¬ÖÐ£¬Èçµç×ÓÉí·ÝÖ¤¡¢½ðÈÚ¿¨¡¢Éç±£¿¨¡¢¹«½»¿¨Ð¾Æ¬µÈ£¬±¾·¢Ã÷¿ÉÒÔÅäºÏÆäËûÐ¾Æ¬Òì³£¹¤×÷Ìõ¼þ¼ì³ö»úÖÆ±£»¤Ð¾Æ¬²»±»·Ç·¨Ó°Ïì»òÇÖÈë£¬´Ó¶øÌá¸ß¶ÔÐ¾Æ¬ÄÚ²¿×ÊÔ´µÄ°²È«±£»¤Ç¿¶È¡£	°²È«
Ò»ÖÖµÖ¿¹Ð¾Æ¬¼Ä´æÆ÷¹ÊÕÏ×¢ÈëµÄ·½·¨	±±¾©ÖÐµç»ª´óµç×ÓÉè¼ÆÓÐÏÞÔðÈÎ¹«Ë¾	2016-12-29	2018-07-06	CN108256356A	Ö÷·ÖÀàºÅ£ºG06F21/76(2013.01)I	ÔÚÉó-ÊµÖÊÉó²éµÄÉúÐ§	102209 ±±¾©ÊÐ²ýÆ½Çø±±Æß¼ÒÕòÎ´À´¿Æ¼¼³ÇÄÏÇøÖÐ¹úµç×ÓÍøÂç°²È«ºÍÐÅÏ¢»¯²úÒµ»ùµØC¶°	±¾·¢Ã÷Ìá³öÒ»ÖÖµÖ¿¹Ð¾Æ¬¼Ä´æÆ÷¹ÊÕÏ×¢ÈëµÄ·½·¨¡£Ó¦ÓÃÔÚÓÐ°²È«ÒªÇóµÄ¸÷ÖÖ°²È«Ð¾Æ¬ÖÐ£¬Èçµç×ÓÉí·ÝÖ¤¡¢½ðÈÚ¿¨¡¢Éç±£¿¨¡¢¹«½»¿¨Ð¾Æ¬µÈ£¬±¾·¢Ã÷¿ÉÒÔÅäºÏÆäËûÐ¾Æ¬¸´Î»»úÖÆ±£»¤Ð¾Æ¬²»±»·Ç·¨Ó°Ïì»òÇÖÈë£¬´Ó¶øÌá¸ß¶ÔÐ¾Æ¬ÄÚ²¿×ÊÔ´µÄ°²È«±£»¤Ç¿¶È¡£	°²È«
Ò»ÖÖRIMÉí·Ý¹ÜÀíÏµÍ³¼°·½·¨	É½¶«ÖÐ¼Ü¹¤ÈËÐÅÏ¢¼¼Êõ¹É·ÝÓÐÏÞ¹«Ë¾	2016-12-30	2017-06-13	CN106845178A	Ö÷·ÖÀàºÅ£ºG06F21/31(2013.01)I	ÔÚÉó-ÖøÂ¼ÊÂÏî±ä¸ü	250100 É½¶«Ê¡¼ÃÄÏÊÐ¼ÃÄÏ¸ßÐÂ¼¼Êõ²úÒµ¿ª·¢Çø¹ÜÎ¯»áÊÐ³¡¼à¹Ü¾Ö	±¾·¢Ã÷ÊôÓÚÍ¨ÐÅ¼¼ÊõÁìÓò£¬Éæ¼°Ò»ÖÖRIMÉí·Ý¹ÜÀíÏµÍ³¼°·½·¨£¬Æä·½·¨Ö÷ÒªÊÇÓ¦ÓÃÓÚÉí·Ý¹ÜÀíÏµÍ³£¬°üÀ¨Éí·ÝÂ¼ÈëºÍÉí·ÝÐÅÏ¢ÐÞ¸ÄÁ½²¿·Ö£¬ÆäÏµÍ³Ö÷Òª°üÀ¨ÔÆ¶Ë·þÎñÆ÷¡¢´¢´æÄ£¿é¡¢Éí·ÝÖ¤Ê¶±ðÂ¼ÈëÄ£¿é¡¢3D»îÌåÖ¸ÎÆÊ¶±ðÂ¼ÈëÄ£¿é¡¢ºçÄ¤Ê¶±ðÂ¼ÈëÄ£¿é¡¢ÒøÐÐ¿¨Ê¶±ðÂ¼ÈëÄ£¿é¡¢¸¨ÖúÂ¼ÈëÄ£¿éÒÔ¼°Éí·ÝÐÞ¸ÄÄ£¿é¡£±¾·¢Ã÷Í¨¹ýÉí·ÝÖ¤Ê¶±ðÂ¼ÈëÄ£¿é¡¢3D»îÌåÖ¸ÎÆÊ¶±ðÂ¼ÈëÄ£¿é¡¢ºçÄ¤Ê¶±ðÂ¼ÈëÄ£¿é¡¢ÒøÐÐ¿¨Ê¶±ðÂ¼ÈëÄ£¿éºÍ¸¨ÖúÂ¼ÈëÄ£¿é¶àÖÖÊÖ¶Î¶ÔÉí·Ý¹ÜÀíÈËÔ±Ïà¹Ø…	°²È«
Ò»ÖÖÖ§¸¶Ó¦ÓÃµÄ¸ôÀë·½·¨¡¢×°ÖÃ¼°ÖÕ¶Ë	»ªÎª¼¼ÊõÓÐÏÞ¹«Ë¾	2016-12-30	2018-06-29	CN108235767A	Ö÷·ÖÀàºÅ£ºG06F21/74(2013.01)I	ÔÚÉó-ÊµÖÊÉó²éµÄÉúÐ§	518129 ¹ã¶«Ê¡ÉîÛÚÊÐÁú¸ÚÇøÛàÌï»ªÎª×Ü²¿°ì¹«Â¥	Ò»ÖÖÖ§¸¶Ó¦ÓÃµÄ¸ôÀë·½·¨¡¢×°ÖÃ¼°ÖÕ¶Ë¡£ÔÚ¸ÃÖ§¸¶Ó¦ÓÃµÄ¸ôÀë·½·¨ÖÐ£¬»ñÈ¡ÓÃ»§Ñ¡ÔñµÄ¡¢´ýÌí¼Óµ½¸ôÀëÇøµÄÖ§¸¶Ó¦ÓÃ£»Èô´ýÌí¼ÓµÄËùÊöÖ§¸¶Ó¦ÓÃ¾ßÓÐÌí¼Óµ½µÚÒ»¸ôÀëÇøµÄÊôÐÔ£¬Ôò½«´ýÌí¼ÓµÄËùÊöÖ§¸¶Ó¦ÓÃÌí¼Óµ½µÚÒ»¸ôÀëÇø£»Èô´ýÌí¼ÓµÄËùÊöÖ§¸¶Ó¦ÓÃ¾ßÓÐÌí¼Óµ½µÚ¶þ¸ôÀëÇøµÄÊôÐÔ£¬Ôò½«´ýÌí¼ÓµÄËùÊöÖ§¸¶Ó¦ÓÃÌí¼Óµ½µÚ¶þ¸ôÀëÇø£»ÆäÖÐ£¬Ìí¼Óµ½µÚÒ»¸ôÀëÇøÄÚµÄÖ§¸¶Ó¦ÓÃ¾ßÓÐÄÜ¹»±»°²×°ÔÚËùÊöµÚÒ»¸ôÀëÇøÖ®ÍâµÄ¿ÉÐÅÓ¦ÓÃµ÷ÓÃµÄÊôÐÔ£¬Ìí¼Óµ½µÚ¶þ¸ôÀëÇøÄÚµÄÖ…	°²È«
»ùÓÚ³¡¾°ÐÅÏ¢µÄÓïÒôÉí·ÝÈÏÖ¤ÏµÍ³	Ìì½ò·ÉÌÚÊÀ¼Í×Ô¶¯»¯¿Æ¼¼ÓÐÏÞ¹«Ë¾	2016-12-30	2018-07-10	CN108269092A	Ö÷·ÖÀàºÅ£ºG06Q20/40(2012.01)I	ÔÚÉó-¹«¿ª	300203 Ìì½òÊÐÎäÇåÇøÑî´å¾Û²ÆµÀ7ºÅ	±¾·¢Ã÷»ùÓÚ³¡¾°ÐÅÏ¢µÄÓïÒôÉí·ÝÈÏÖ¤ÏµÍ³£¬ÆäÌØÕ÷ÔÚÓÚ£º°üÀ¨Ö§¸¶ÖÕ¶Ë£¬Ö÷¿ØµçÂ·°å£¬´¥ÃþÏÔÊ¾ÆÁ¡¢ÍøÂçÍ¨Ñ¶Æ÷¡¢ÓÃ»§ÐÅÏ¢×¢²áÄ£¿é¡¢ÉùÎÆÊ¶±ðÄ£¿é¡¢Ö§¸¶Ä£¿éºÍ·þÎñÆ÷£¬ÇÒÖ÷¿ØµçÂ·°åÎ»ÓÚÖ§¸¶ÖÕ¶ËÄÚ£¬´¥ÃþÏÔÊ¾ÆÁÔÚÖ§¸¶ÖÕ¶ËµÄ±íÃæÓÃÓÚÏÔÊ¾ÐÅÏ¢Êý¾Ý£»´¥ÃþÏÔÊ¾ÆÁ¡¢ÍøÂçÍ¨Ñ¶Æ÷¡¢ÓÃ»§ÐÅÏ¢×¢²áÄ£¿é¡¢ÉùÎÆÊ¶±ðÄ£¿é¡¢Ö§¸¶Ä£¿é¾ùÓëÖ÷¿ØµçÂ·°åÁ¬½Ó£¬ÇÒÖ§¸¶ÖÕ¶ËÍ¨¹ýWIFIÐÅºÅÓë·þÎñÆ÷ÊµÏÖÐÅºÅ´«ÊäÁ¬½Ó£»ÓÃ»§ÐÅÏ¢×¢²áÄ£¿é°üÀ¨¼ÇÂ¼Æ÷£¬¼ÇÂ¼Æ÷ÓÃÓÚ²É¼¯ÓÃ»…	°²È«
»ùÓÚ¹©Ó¦Á´½ðÈÚ·þÎñÆ½Ì¨µÄ¹«Ë¾È¨ÏÞÍÐ¹ÜÏµÍ³	ÈÚ½Ý¿Æ¼¼£¨Îäºº£©ÓÐÏÞ¹«Ë¾	2016-12-31	2017-07-28	CN106991302A	Ö÷·ÖÀàºÅ£ºG06F21/31(2013.01)I	ÔÚÉó-¹«¿ª	430000 ºþ±±Ê¡ÎäººÊÐºéÉ½Çø¶«ºþ¿ª·¢ÇøÎä´óÔ°ËÄÂ·3ºÅÎäºº´óÑ§¿Æ¼¼Ô°ÄÚB3Â¥10Â¥1028¡¢1088ºÅ	±¾·¢Ã÷¹«¿ªÁËÒ»ÖÖ»ùÓÚ¹©Ó¦Á´½ðÈÚ·þÎñÆ½Ì¨µÄ¹«Ë¾È¨ÏÞÍÐ¹ÜÏµÍ³£¬ÆäÌØÕ÷ÔÚÓÚ£º¸ÃÏµÍ³½«¹©Ó¦Á´½ðÈÚ·þÎñÓÃ»§»®·ÖÎª±»ÍÐ¹Ü·½¡¢ÍÐ¹Ü·½ºÍ·þÎñ·½£¬¶ø·þÎñÈ¨ÏÞÎªÐÂÔöÓÃ»§¡¢É¾³ýÓÃ»§¡¢ÐÞ¸ÄÓÃ»§¡¢ÉÏ´«Æ±¾Ý¡¢Æ±¾ÝÉóÅú¡¢ÉêÇëÈÚ×Ê¡¢ÈÚ×ÊÉóÅú¡£±¾·¢Ã÷ÄÜ¹»ÊµÏÖÒ»ÖÖ¿É¸üÁé»î×ÔÓÉµÄÈ¨ÏÞÍÐ¹Ü»úÖÆ£¬Ê¹ÊÚÈ¨·½¿É×Ô¼º¾ö¶¨ÐèÒªÊÚÈ¨¸ø±»ÊÚÈ¨·½ÄÄÐ©¹¦ÄÜÈ¨ÏÞ£¬Ò²¿ÉÒÔ×Ô¼ºËæÊ±ÊÕ»ØÈ¨ÏÞ£¬±»ÊÚÈ¨·½µÄÓÃ»§£¬¿ÉÒÔÍ¨¹ý×Ô¼ºµÄ²Ù×÷½çÃæ£¬Áé»îÇÐ»»ÎªÆäËûÍÐ¹Ü·½½ÇÉ«£¬²¢Ö…	Êý¾Ý·ÖÎö
Ò»ÖÖÊ¹ÓÃObjcctivcÓïÑÔ¿ª·¢µÄ¹ÉÆ±Èí¼þÏµÍ³	ºþÄÏÏú¿ÍÔÆÉÌÍøÂç¼¼ÊõÓÐÏÞ¹«Ë¾	2017-01-12	2018-07-20	CN108304170A	Ö÷·ÖÀàºÅ£ºG06F8/30(2018.01)I	ÔÚÉó-¹«¿ª	410011 ºþÄÏÊ¡³¤É³ÊÐÜ½ÈØÇøÉØÉ½±±Â·139ºÅÎÄ»¯´óÏÃ20Â¥	±¾·¢Ã÷¹«²¼ÁËÒ»ÖÖÊ¹ÓÃObjcctivcÓïÑÔ¿ª·¢µÄ¹ÉÆ±Èí¼þÏµÍ³£¬±¾ÏµÍ³º­¸Ç×ÊÑ¶¡¢Ä£Äâ³´¹ÉºÍ¹ÉÆ±ÐÅÏ¢£¬Í¬Ê±ÕûºÏ¸÷´ó²Æ¾­ÃÅ»§ÍøÕ¾ÐÅÏ¢¼°µ÷ÑÐ±¨¸æ£¬¹©ÎÞ¾­ÑéµÄÏëÒªÍ¶×Ê³´¹ÉµÄÈºÌå²Î¿¼£¬ÏµÍ³»ùÓÚÒÆ¶¯IOSÊÖ»ú¿Í»§¶Ë£¬Ê¹ÓÃObjcctivc?CÓïÑÔ¿ª·¢£¬¿ÉÄ£Äâ¹ÉÆ±½»Ò×¹¦ÄÜ£¬ÈÃÓÃ»§ÊµÊ±²ÎÓëÕæÊµµÄ³´¹É¹æÔòÓëÁ÷³Ì¡£	Í¶×Ê
Ò»ÖÖ³®Æ±ÌØÕ÷ÐÅÏ¢µÄ¶ÁÐ´·½·¨¡¢×°ÖÃ¼°ÏµÍ³	±±¾©ÔÆÖª¿Æ¼¼ÓÐÏÞ¹«Ë¾	2017-01-18	2017-06-13	CN106846604A	Ö÷·ÖÀàºÅ£ºG07D7/0047(2016.01)I	ÔÚÉó-ÊµÖÊÉó²éµÄÉúÐ§	100094 ±±¾©ÊÐº£µíÇø±±ÇåÂ·68ºÅÔº24ºÅÂ¥D×ù4²ã459	±¾·¢Ã÷ÊµÊ©Àý¹«¿ªÁËÒ»ÖÖ³®Æ±ÌØÕ÷ÐÅÏ¢µÄ¶ÁÐ´·½·¨¡¢×°ÖÃ¼°ÏµÍ³£¬ÊôÓÚÑéÖ¤ÐÅÏ¢¶ÁÐ´¼¼ÊõÁìÓò¡£ÆäÖÐ£¬¸Ã·½·¨°üÀ¨»ùÓÚ»ñÈ¡µ½µÄ³®Æ±ÐÅÏ¢£¬Éú³ÉÓëËùÊö³®Æ±¶ÔÓ¦µÄÌØÕ÷ÐÅÏ¢£»ÀûÓÃ¿Í»§¶ËË½Ô¿¶ÔËùÊöÌØÕ÷ÐÅÏ¢½øÐÐ¼ÓÃÜ£¬Éú³É¿Í»§¶ËË½Ô¿¼ÓÃÜÌØÕ÷ÐÅÏ¢£¬²¢·¢ËÍËùÊö¿Í»§¶ËË½Ô¿¼ÓÃÜÌØÕ÷ÐÅÏ¢£»ÔÚ½ÓÊÕµ½»ùÓÚËùÊö¿Í»§¶ËË½Ô¿¼ÓÃÜÌØÕ÷ÐÅÏ¢·µ»ØµÄÈ·ÈÏÐ´ÈëÇëÇóÊ±£¬½«ËùÊöÌØÕ÷ÐÅÏ¢Ð´Èë³®Æ±Ð¾Æ¬¶Ë¡£ÕâÑùÉèÖÃµÄÄ¿µÄÊÇ¶Å¾øÁËÎ±ÔìÕßÀûÓÃÐé¼Ù¿Í»§¶Ë½øÐÐÌØÕ÷ÐÅÏ¢µÄÐ…	°²È«
ÊÖ»úÉãÏñÍ·¶àÖ¸ÎÆÍ¬²½ÌáÈ¡·½·¨¼°ÏµÍ³	ÉîÛÚÊÐ°ÙÍ¨ÐÅÏ¢¼¼ÊõÓÐÏÞ¹«Ë¾	2017-01-19	2017-06-13	CN106845407A	Ö÷·ÖÀàºÅ£ºG06K9/00(2006.01)I	ÔÚÉó-ÊµÖÊÉó²éµÄÉúÐ§	518000 ¹ã¶«Ê¡ÉîÛÚÊÐÄÏÉ½ÇøÔÁº£½ÖµÀÉîÛÚÈí¼þÔ°T2-B¶°-609ÊÒ	±¾·¢Ã÷¹«¿ªÁËÒ»ÖÖÊÖ»úÉãÏñÍ·¶àÖ¸ÎÆÍ¬²½ÌáÈ¡·½·¨¼°ÏµÍ³£¬·½·¨°üÀ¨²½Öè£ºS1·¢ËÍÖ¸ÎÆÅÄÉãÇëÇó£»S2Ö¸ÎÆÅÄÉã£»½«Í¬Ò»Ö»ÊÖµÄÊ³Ö¸¡¢ÖÐÖ¸¡¢ÎÞÃûÖ¸¼°Ð¡ÊÖÖ¸ÖÐµÄÖÁÉÙÁ½ÊÖÖ¸¶Ô×¼ÊÖ»úÉãÏñÍ·£¬²¢Ê¹ÆäÏÔÊ¾ÔÚÊÖ»úÏÔÊ¾ÆÁÉÏ£»²ÎÕÕÊÖ»úÏÔÊ¾ÆÁ£¬Í¨¹ýÊÖ»úÉãÏñÍ·Í¬²½²¶×½ÖÁÉÙÁ½ÊÖÖ¸Ö¸ÎÆÍ¼Ïñ£»µã»÷ÊÖ»úÖ¸ÎÆÅÄÉã¼ü£¬Íê³ÉÖÁÉÙÁ½ÊÖÖ¸µÄÖ¸ÎÆÍ¼ÏñµÄÅÄÉã£»S3Ö¸ÎÆÍ¼Æ¬´¦Àí£»S4Ö¸ÎÆÍ¼Æ¬È·ÈÏ¡£Ð§¹û£ºÔÚ¶ÔÖ¸ÎÆ²É¼¯ÌáÈ¡Ê±£¬Íê³ÉÖÁÉÙÁ½ÊÖÖ¸Ö¸ÎÆÍ¼ÏñµÄ²É¼¯ÌáÈ¡£¬ÔÚºóÐ…	°²È«
Ò»ÖÖ·À²ð¼ì²âµÄÊµÏÖ×°ÖÃ¼°·½·¨	´óÌÆÎ¢µç×Ó¼¼ÊõÓÐÏÞ¹«Ë¾	2017-01-20	2017-07-04	CN106919861A	Ö÷·ÖÀàºÅ£ºG06F21/77(2013.01)I	ÔÚÉó-ÊµÖÊÉó²éµÄÉúÐ§	100094 ±±¾©ÊÐº£µíÇøÓÀ¼Î±±Â·6ºÅ	±¾·¢Ã÷¹«¿ªÁËÒ»ÖÖ·À²ð¼ì²âµÄÊµÏÖ×°ÖÃ¼°·½·¨£¬ËùÊö·À²ð¼ì²âµÄÊµÏÖ×°ÖÃ£¬°üÀ¨Ó¡ÖÆµçÂ·°åPCB°å£¬»¹°üÀ¨Î»ÓÚËùÊöPCB°åÉÏµÄÖ§¸¶ÖÕ¶ËÐ¾Æ¬¡¢¿É³äµçµç³ØºÍ·À²ðµçÂ·£¬ÆäÖÐ£¬ËùÊö¿É³äµçµç³ØÓëËùÊöÖ§¸¶ÖÕ¶ËÐ¾Æ¬ÏàÁ¬£¬ÓÃÓÚÔÚËùÊöÖ§¸¶ÖÕ¶ËÐ¾Æ¬¶ÏµçÊ±£¬ÎªËùÊöÖ§¸¶ÖÕ¶ËÐ¾Æ¬¹©µç£»ËùÊöÖ§¸¶ÖÕ¶ËÐ¾Æ¬ÓëËùÊö·À²ðµçÂ·ÏàÁ¬£¬ÓÃÓÚ¼ì²âµ½ËùÊö·À²ðµçÂ·Ôâµ½ÆÆ»µÊ±£¬²Á³ýËùÊöÖ§¸¶ÖÕ¶ËÐ¾Æ¬ÖÐµÄ¹Ø¼üÐÅÏ¢¡£±¾·¢Ã÷ÊµÊ©ÀýÍ¨¹ý²ÉÓÃ¿É³äµçµç³ØºÍ·À²ðµçÂ·£¬Ê¹µÃÔÚÖ§¸…	Ö§¸¶
SIM¿¨·ÖÀë·½·¨¡¢×°ÖÃ¼°µç×ÓÉè±¸	ÄÏ²ýºÚöè¿Æ¼¼ÓÐÏÞ¹«Ë¾	2017-02-07	2018-08-14	CN108400794A	Ö÷·ÖÀàºÅ£ºH04B1/3818(2015.01)I	ÔÚÉó-ÊµÖÊÉó²éµÄÉúÐ§	330008 ½­Î÷Ê¡ÄÏ²ýÊÐÇàÉ½ºþÇøÄÏ²ý¾­¼Ã¼¼Êõ¿ª·¢ÇøòÔÇÅÕò°ì¹«Â¥	±¾·¢Ã÷Ìá¹©Ò»ÖÖSIM¿¨·ÖÀë·½·¨¡¢×°ÖÃ¼°µç×ÓÉè±¸£¬ÊôÓÚµç×ÓÉè±¸¼¼ÊõÁìÓò¡£¸ÃSIM¿¨·ÖÀë·½·¨°üÀ¨£º²É¼¯ÉúÎïÌØÕ÷ÐÅÏ¢£»½«²É¼¯µÄÉúÎïÌØÕ÷ÐÅÏ¢ÓëÄ£°å¿â½øÐÐÆ¥Åä£¬Ä£°å¿â°üÀ¨ÖÁÉÙÒ»¸öÔ¤ÉèµÄÉúÎïÌØÕ÷ÐÅÏ¢£»ÈôÆ¥Åä³É¹¦£¬Ôò¿ØÖÆ¿¨×ùÓë¿¨²Û·ÖÀë£¬ÒÔÊ¹SIM¿¨Óëµç×ÓÉè±¸·ÖÀë¡£±¾·¢Ã÷Ìá¹©µÄSIM¿¨·ÖÀë·½·¨¡¢×°ÖÃ¼°µç×ÓÉè±¸£¬Ìá¸ßÁËSIM¿¨µÄ°²È«ÐÔ¡£	°²È«
Ò»ÖÖ²ÆÎñÊý¾Ý·ÃÎÊ·ÖÎöÏµÍ³¼°Ê¹ÓÃ·½·¨	ÉîÛÚÊÐ½ðÕþÈí¼þ¼¼ÊõÓÐÏÞ¹«Ë¾	2017-02-08	2017-06-13	CN106845946A	Ö÷·ÖÀàºÅ£ºG06Q10/10(2012.01)I	ÔÚÉó-ÊµÖÊÉó²éµÄÉúÐ§	518000 ¹ã¶«Ê¡ÉîÛÚÊÐÁú»ªÐÂÇøÃñÖÎ½ÖµÀÃñÖÎ±¦É½´´ÒµÔ°A2¶°ð©Ô´ÉÌÎñÖÐÐÄ518ÊÒ	±¾·¢Ã÷¹«¿ªÁËÒ»ÖÖ²ÆÎñÊý¾Ý·ÃÎÊ·ÖÎöÏµÍ³£¬°üÀ¨Êý¾Ý²Ù¿ØÖÕ¶Ë¡¢Êý¾ÝÍ¨Ñ¶ÍøÂç¡¢²ÆÎñÊý¾Ý´¦Àí·þÎñÆ÷¼°²ÆÎñÊý¾ÝÊä³ö×°ÖÃ£¬²ÆÎñÊý¾Ý´¦Àí·þÎñÆ÷Í¨¹ýÊý¾ÝÍ¨Ñ¶ÍøÂç·Ö±ðÓë²Ù¿ØÖÕ¶ËºÍ²ÆÎñÊý¾ÝÊä³ö×°ÖÃÁ¬½Ó£¬²Ù¿ØÖÕ¶ËºÍ²ÆÎñÊý¾ÝÊä³ö×°ÖÃ¾ùÈô¸É¸ö£¬ÆäÖÐ²Ù¿ØÖÕ¶Ë¼äÍ¨¹ýÊý¾ÝÍ¨Ñ¶ÍøÂç¹¹³ÉÖÁÉÙÒ»¸ö²ÆÎñ·þÎñ×Ó¾ÖÓòÍø£¬²ÆÎñÊý¾ÝÊä³ö×°ÖÃÖ®¼äÏà»¥²¢Áª¡£±¾·¢Ã÷ÔÚÂú×ã¶Ô²ÆÎñÊý¾Ý²Ù×÷¹ÜÀíµÄÍ¬Ê±£¬Áí¿ÉÓÐÐ§µÄ¶Ô²ÆÎñ¹ÜÀíÈËÔ±µÄÉí·Ý¡¢Êý¾Ý´¦ÀíÈ¨ÏÞ½øÐÐ¿ÆÑ§ÓÐÐ…	°²È«
½ðÈÚÏµÍ³·ç¿ØË«Â¼Éè±¸¼°ÆäÎÄ¼þ´æ´¢·½·¨	º¼ÖÝ°Ùº½ÐÅÏ¢¼¼ÊõÓÐÏÞ¹«Ë¾	2017-02-13	2017-06-06	CN106803908A	Ö÷·ÖÀàºÅ£ºH04N5/76(2006.01)I	ÔÚÉó-ÊµÖÊÉó²éµÄÉúÐ§	310000 Õã½­Ê¡º¼ÖÝÊÐÎ÷ºþÇøÎÄ¶þÂ·391ºÅÎ÷ºþ¹ú¼Ê¿Æ¼¼´óÏÃB3-901ÊÒ	±¾·¢Ã÷Éæ¼°Ò»ÖÖ½ðÈÚÏµÍ³·ç¿ØË«Â¼Éè±¸£¬½â¾öÁËÏÖÓÐ¼¼ÊõµÄ²»×ã£¬¼¼Êõ·½°¸Îª£ºÓë´æ´¢ÑéÖ¤·þÎñÆ÷ÒÔ¼°´¦ÀíµçÄÔÅäÌ×Ê¹ÓÃ£¬°üÀ¨Ò»¸öÖ÷Ë«Â¼×°ÖÃºÍÒ»¸ö¸¨ÖúË«Â¼×°ÖÃ£¬ËùÊöÖ÷Ë«Â¼×°ÖÃ°üÀ¨µ××ù¡¢Ö§³ÅÖù¡¢µÚÒ»ÉãÏñÍ·¡¢µÚ¶þÉãÏñÍ·¡¢ÉùÒô²É¼¯×°ÖÃ¡¢Ö÷¿Ø´¦ÀíÆ÷ºÍÍ¨ÐÅÐ¾Æ¬£»ËùÊö¸¨ÖúË«Â¼Éè±¸°üÀ¨Ã¾ÂÁºÏ½ð¹Ü¡¢¹Ì¶¨×ù¡¢¸¨ÖúÉãÏñÍ·ºÍ¸¨ÖúÉùÒô²É¼¯×°ÖÃ£»ËùÊöÖ§³ÅÖù¹Ì¶¨ÔÚËùÊöµ××ùµÄÉÏ±íÃæ£¬ËùÊöµÚÒ»ÉãÏñÍ·ºÍµÚ¶þÉãÏñÍ··Ö±ð°²×°ÔÚËùÊö¹Ì¶¨ÖùµÄÁ½²à£¬ËùÊ…	°²È«
½ðÈÚ½»Ò×·çÏÕ¹Ü¿ØÏµÍ³¼°Æä´æ´¢ÎÄ¼þ¿ìËÙÊ¶±ð¶¨Î»·½·¨	º¼ÖÝ°Ùº½ÐÅÏ¢¼¼ÊõÓÐÏÞ¹«Ë¾	2017-02-13	2017-07-07	CN106934713A	Ö÷·ÖÀàºÅ£ºG06Q40/02(2012.01)I	ÔÚÉó-ÊµÖÊÉó²éµÄÉúÐ§	310000 Õã½­Ê¡º¼ÖÝÊÐÎ÷ºþÇøÎÄ¶þÂ·391ºÅÎ÷ºþ¹ú¼Ê¿Æ¼¼´óÏÃB3-901ÊÒ	±¾·¢Ã÷Éæ¼°Ò»ÖÖ½ðÈÚ½»Ò×·çÏÕ¹Ü¿ØÏµÍ³¼°Æä´æ´¢ÎÄ¼þ¿ìËÙÊ¶±ð¶¨Î»·½·¨£¬½â¾öÁËÏÖÓÐ¼¼ÊõµÄ²»×ã£¬¼¼Êõ·½°¸Îª£ºÓÉµçÔ´¹©µç£¬°üÀ¨ÑéÖ¤´æ´¢·þÎñÆ÷¡¢´¦ÀíµçÄÔ¡¢Éí·ÝÖ¤ÐÅÏ¢ÁªÍø¶ÁÈëÉè±¸¡¢ºÏÍ¬ÎÄµµÅÄÉã×°ÖÃ¡¢Êý×ÖÇ©ÃûÏÔÊ¾Æ÷ºÍ½ðÈÚÏµÍ³·ç¿ØË«Â¼Éè±¸£¬ÑéÖ¤´æ´¢·þÎñÆ÷Óë´¦ÀíµçÄÔÍ¨ÐÅÁ¬½Ó£¬´¦ÀíµçÄÔ·Ö±ðÓëÉí·ÝÖ¤ÐÅÏ¢ÁªÍø¶ÁÈëÉè±¸¡¢ºÏÍ¬ÎÄµµÅÄÉã×°ÖÃ¡¢Êý×ÖÇ©ÃûÏÔÊ¾Æ÷ºÍ½ðÈÚÏµÍ³·ç¿ØË«Â¼Éè±¸µçÁ¬½Ó¡£±¾·¢Ã÷¿ÉÒÔÊµÏÖ¿ìËÙÊ¶±ð¶¨Î»ÕÒµ½ºÍ¸Ã¿Í»§Ïà¹ØµÄÒ…	°²È«
Ò»ÖÖÔ¶³ÌÊÚÈ¨·½·¨¼°ÏµÍ³	ÉîÛÚÊÐÒÚµÀÊýÂë¼¼ÊõÓÐÏÞ¹«Ë¾	2017-02-15	2017-05-10	CN106650386A	Ö÷·ÖÀàºÅ£ºG06F21/32(2013.01)I	ÔÚÉó-×¨ÀûÉêÇëÈ¨¡¢×¨ÀûÈ¨µÄ×ªÒÆ	518000 ¹ã¶«Ê¡ÉîÛÚÊÐ±¦°²ÇøÐÂ°²½ÖµÀ±¦³Ç28Çø´ó±¦Â·49-1ºÅ6FC	±¾·¢Ã÷Ìá¹©Ò»ÖÖÔ¶³ÌÊÚÈ¨·½·¨¼°ÏµÍ³£¬ÊôÓÚÉí·ÝÊ¶±ð¼¼ÊõÁìÓò¡£±¾·¢Ã÷Ô¶³ÌÊÚÈ¨·½·¨°üÀ¨ÈçÏÂ²½Öè£ºÉí·ÝÊ¶±ð×°ÖÃÑéÖ¤Éí·ÝÐÅÏ¢£»Èç¹ûÑéÖ¤Í¨¹ý£¬Í¨¹ýµÚÒ»Íø¹Ø½«ÊÚÈ¨ÈËÐÅÏ¢·¢ËÍ¸ø·þÎñÆ÷£»·þÎñÆ÷ÔÚÉè¶¨Ê±¼äÄÚµÈ´ýÆäËûÊÚÈ¨ÈËÐÅÏ¢£¬ÅÐ¶ÏËùÓÐÊÚÈ¨ÈËÐÅÏ¢ÊÇ·ñÊôÓÚÒ»¸ö×é£¬Èç¹ûÊÇ£¬½«È·ÈÏÐÅÏ¢¼ÓÃÜºó·¢ËÍ¸øÓëÉí·ÝÈ·ÈÏ×°ÖÃÁ¬½ÓµÄµÚ¶þÍø¹Ø£»µÚ¶þÍø¹Ø×ª·¢È·ÈÏÐÅÏ¢¸øÉí·ÝÈ·ÈÏ×°ÖÃ£»Éí·ÝÈ·ÈÏ×°ÖÃ½«Éí·ÝÈÏÖ¤Í¨¹ýÖ¸Áî·¢ËÍ¸øÈÏÖ¤Éè±¸¡£±¾·¢Ã÷²ÉÓÃÉí·ÝÊ¶±ð×…	°²È«
ÓÃÓÚÍøÂçÖ§¸¶µÄÊý¾Ý·¢ËÍ·½·¨ºÍ×°ÖÃ¡¢½ÓÊÕ·½·¨ºÍ×°ÖÃ	ÌÚÑ¶¿Æ¼¼£¨ÉîÛÚ£©ÓÐÏÞ¹«Ë¾	2017-02-16	2018-08-24	CN108446903A	Ö÷·ÖÀàºÅ£ºG06Q20/32(2012.01)I	ÔÚÉó-¹«¿ª	518000 ¹ã¶«Ê¡ÉîÛÚÊÐÄÏÉ½Çø¸ßÐÂÇø¿Æ¼¼ÖÐÒ»Â·ÌÚÑ¶´óÏÃ35²ã	±¾·¢Ã÷Éæ¼°Ò»ÖÖÊý¾Ý·¢ËÍ·½·¨ºÍ×°ÖÃ¡¢½ÓÊÕ·½·¨ºÍ×°ÖÃ£¬ÒÔ¼°ÓÃÓÚÍøÂçÖ§¸¶µÄÊý¾Ý·¢ËÍ·½·¨ºÍ×°ÖÃ¡¢½ÓÊÕ·½·¨ºÍ×°ÖÃ¡£¸ÃÊý¾Ý·¢ËÍ·½·¨°üÀ¨£ºµÚÒ»ÖÕ¶ËÍ¨¹ýÓ¦ÓÃ½ÓÊÕ¶ÔÄ¿±êÊý¾ÝµÄ·¢ËÍÖ¸Áî£¬ËùÊöÊý¾Ý·¢ËÍÖ¸ÁîÖÐ°üÀ¨·¢ËÍÄ¿±êµÄÓÃ»§±êÊ¶£»»ñÈ¡ËùÊöÄ¿±êÊý¾ÝÖÐµÄµÚÒ»×Ö¶ÎÐÅÏ¢£»½«ËùÊöµÚÒ»×Ö¶ÎÐÅÏ¢ÓëËùÊöÓÃ»§±êÊ¶½øÐÐ°ó¶¨£¬²¢·â×°³ÉÏûÏ¢°ü£¬Ê¹ËùÊöÏûÏ¢°ü±»ÆäËüÖÕ¶ËÍ¨¹ýËùÊöÓ¦ÓÃ½ÓÊÕÊ±£¬´¥·¢¶ÔËùÊöÏûÏ¢°üÖÐµÄÓ¦ÓÃ±êÊ¶Óë±»½ÓÊÕµÄÓ¦ÓÃµÄÓÃ»§±êÊ¶µÄÒ»Ö…	Ö§¸¶
Ò»ÖÖ¼ÆËã»úÍâ½ÓUSBÃØÔ¿°²È«ÑéÖ¤·½·¨	Õò½­¿µºãÐÅÏ¢¿Æ¼¼ÓÐÏÞ¹«Ë¾	2017-02-22	2017-06-27	CN106897600A	Ö÷·ÖÀàºÅ£ºG06F21/34(2013.01)I	ÔÚÉó-ÊµÖÊÉó²éµÄÉúÐ§	212121 ½­ËÕÊ¡Õò½­ÊÐµ¤Í½ÇøÉÏµ³ÕòÉÏ»á»á¶«Â·48-7	±¾·¢Ã÷¹«¿ªÁËÒ»ÖÖ¼ÆËã»úÍâ½ÓUSBÃØÔ¿°²È«ÑéÖ¤·½·¨£¬°üÀ¨¼ÆËã»úºÍUSBÃØÔ¿£¬ÆäÖÐ¼ÆËã»úÄÚ°üÀ¨ÃØÔ¿´¦ÀíÆ÷¡¢Âß¼­¼ÓÃÜµçÂ·Ä£¿é¡¢ÐÅÏ¢±È¶ÔÆ÷¡¢¼ÆËã»ú´æ´¢Æ÷ºÍUSB½Ó¿Ú£¬USBÃØÔ¿°üÀ¨Êý¾Ý´¦ÀíÆ÷ºÍUSB´æ´¢Æ÷£»USBÃØÔ¿²åÈë¼ÆËã»úµÄUSB½Ó¿Ú£¬USBÃØÔ¿µÄUSB´æ´¢Æ÷Í¨¹ýÊý¾Ý´¦ÀíÆ÷Óë¼ÆËã»úÖÐµÄÃØÔ¿´¦ÀíÆ÷Í¨ÐÅ£¬ÃØÔ¿´¦ÀíÆ÷½«ÃØÔ¿ÐÅºÅÍ¨¹ýÂß¼­¼ÓÃÜµçÂ·Ä£¿é´«µÝÖÁÐÅÏ¢±È¶ÔÆ÷£¬ÐÅÏ¢±È¶ÔÆ÷¶ÔUSBÃØÔ¿USB´æ´¢Æ÷ÖÐµÄÃØÔ¿Óë¼ÆËã»ú´æ´¢Æ÷ÖÐµÄÃØÔ¿½øÐÐ±È¶Ô£»±¾…	±£ÏÕ
Ò»ÖÖ°²È«µÄ½ðÈÚPOS»ú¹Ì¼þÉý¼¶·½·¨	¸£½¨Ä§·½µç×Ó¿Æ¼¼ÓÐÏÞ¹«Ë¾	2017-02-22	2017-06-30	CN106909421A	Ö÷·ÖÀàºÅ£ºG06F9/445(2006.01)I	ÔÚÉó-ÊµÖÊÉó²éµÄÉúÐ§	350000 ¸£½¨Ê¡¸£ÖÝÊÐ²ÖÉ½Çø½¨ÐÂÕò½ðÍ¤Â·1ºÅ1#Â¥203ÊÒ	±¾·¢Ã÷Ìá¹©Ò»ÖÖ°²È«µÄ½ðÈÚPOS»ú¹Ì¼þÉý¼¶·½·¨£¬ËùÊö·½·¨Îª£ºPOS»úÉÏ´«Éè±¸Î¨Ò»ÐÅÏ¢µ½ºóÌ¨·þÎñÆ÷£»ËùÊöºóÌ¨·þÎñÆ÷¸ù¾Ý½ÓÊÕµÄÉè±¸Î¨Ò»ÐÅÏ¢£¬Éú³ÉÏàÓ¦µÄ¹Ì¼þ¾µÏñ£¬×öµ½Ò»»úÒ»¹Ì¼þ£»²»Í¬POS»ú¼äµÄ¹Ì¼þ²»Í¨ÓÃ£¬ÎÞ·¨Ö´ÐÐ£»ËùÊö¹Ì¼þ¾µÏñÖÐÓ¦ÔÚ¶à¸öÖ´ÐÐ·ÖÖ§£¬¶à¸öµãÉÏ½øÐÐ°²È«Ð£ÑéµÄ²Ù×÷£»ËùÊöPOS¼´½øÐÐ¹Ì¼þÉý¼¶Ê±£¬POS»úÉÕÐ´µÄÊ±ºòÒªÁªÍøÉÕÐ´£¬²»ÄÜ±¾µØÉÕÐ´£¬POS»úÍ¨¹ýUSB»òÕßÊÇ´®¿ÚÁ¬½Óµ½PC¿Í»§¶Ë£¬PC¿Í»§¶ËÍ¨¹ýÍøÂçÁ¬½Óµ½ºóÌ¨·þÎñÆ÷£¬ºó…	°²È«
Ö§¸¶ÑéÖ¤×°ÖÃ¼°·½·¨	Å¬±ÈÑÇ¼¼ÊõÓÐÏÞ¹«Ë¾	2017-02-27	2017-07-14	CN106952090A	Ö÷·ÖÀàºÅ£ºG06Q20/32(2012.01)I	ÔÚÉó-ÊµÖÊÉó²éµÄÉúÐ§	518057 ¹ã¶«Ê¡ÉîÛÚÊÐÄÏÉ½Çø¸ßÐÂÇø±±»·´óµÀ9018ºÅ´ó×å´´ÐÂ´óÏÃAÇø6£­8²ã¡¢10£­11²ã¡¢BÇø6²ã¡¢CÇø6£­10²ã	±¾·¢Ã÷¹«¿ªÁËÒ»ÖÖÖ§¸¶ÑéÖ¤×°ÖÃ£¬¸Ã×°ÖÃ°üÀ¨£º¼ÇÂ¼Ä£¿é£¬ÓÃÓÚ¼ÇÂ¼ÒÆ¶¯ÖÕ¶Ë×î½üÒ»´ÎÆÁÄ»½âËøµÄ½âËø·½Ê½£»ÅÐ¶ÏÄ£¿é£¬ÓÃÓÚÔÚËùÊöÒÆ¶¯ÖÕ¶Ë½øÈëÖ§¸¶½çÃæÊ±£¬¸ù¾ÝËùÊö½âËø·½Ê½ÅÐ¶Ïµ±Ç°Ö§¸¶ÊÇ·ñ´æÔÚ°²È«·çÏÕ£»µÚÒ»ÑéÖ¤Ä£¿é£¬ÓÃÓÚÈôµ±Ç°Ö§¸¶´æÔÚ°²È«·çÏÕ£¬Ôò°´ÕÕÔ¤Éè¹æÔò¶Ôµ±Ç°Ö§¸¶½øÐÐÔ¤ÑéÖ¤£»µÚ¶þÑéÖ¤Ä£¿é£¬ÓÃÓÚÔÚÔ¤ÑéÖ¤Í¨¹ýÊ±£¬Ö´ÐÐµ±Ç°Ö§¸¶µÄÕý³£ÑéÖ¤¡£±¾·¢Ã÷»¹¹«¿ªÁËÒ»ÖÖÖ§¸¶ÑéÖ¤·½·¨¡£±¾·¢Ã÷ÄÜ¹»Ìá¸ßÒÆ¶¯Ö§¸¶µÄ°²È«ÐÔ¡£	°²È«
½¨Á¢ÔÚ²ÆÎñºËËã¹¤×ÊµÄË«ÏòÈÏÖ¤ÏµÍ³	ãòÖÝÊÐÖÚÐÅÐÅÏ¢¼¼ÊõÓÐÏÞ¹«Ë¾	2017-03-03	2017-05-31	CN106780004A	Ö÷·ÖÀàºÅ£ºG06Q40/00(2012.01)I	ÔÚÉó-ÊµÖÊÉó²éµÄÉúÐ§	646000 ËÄ´¨Ê¡ãòÖÝÊÐ¸ßÐÂÇø¾Æ¹È´óµÀ5¶Î19ºÅ	±¾·¢Ã÷¹«¿ªÁË½¨Á¢ÔÚ²ÆÎñºËËã¹¤×ÊµÄË«ÏòÈÏÖ¤ÏµÍ³£¬°üÀ¨²ÆÎñºËËãÖÕ¶Ë¡¢ÈËÊÂºËËãÖÕ¶ËºÍÔ±¹¤¸´²éÖÕ¶Ë£¬ÆäÖÐ£»ËùÊöÈËÊÂºËËãÖÕ¶Ë£ººËËãµ±ÔÂÈ«ÌåÔ±¹¤µÄµ×Ð½ºÍÌá³ÉÊý¾Ý£¬·¢ËÍÖÁ²ÆÎñºËËãÖÕ¶ËºÍÊý¾ÝÖÕ¶Ë£»ËùÊö²ÆÎñºËËãÖÕ¶Ë£ºÁ¬½ÓÈËÊÂºËËãÖÕ¶Ë£¬½ÓÊÕÈËÊÂºËËãÖÕ¶ËµÄ¹¤×ÊÐÅÏ¢£»ËùÊöÔ±¹¤¸´²éÖÕ¶Ë£ºÁ¬½Ó²éÑ¯Ä£¿é£¬°üÀ¨°´¼üÄ£¿éºÍÉí·ÝÖ¤Ê¶±ð¿¨²Û£»ËùÊö°´¼üÄ£¿éÊäÈëÃÜÂëÐÅÏ¢·¢ËÍÖÁÃÜÂëÑéÖ¤Ä£¿éÑéÖ¤£»ËùÊöÉí·ÝÖ¤Ê¶±ð¿¨²Û¶ÁÈ¡²É¼¯·¶Î§ÄÚµÄÉí·ÝÖ¤ÐÅÏ¢·…	°²È«
Ò»ÖÖÖ¸ÎÆÖ§¸¶·½·¨¼°ÖÕ¶ËÉè±¸	¹ã¶«Å·çêÒÆ¶¯Í¨ÐÅÓÐÏÞ¹«Ë¾	2017-03-08	2017-12-01	CN107423594A	Ö÷·ÖÀàºÅ£ºG06F21/32(2013.01)I	ÔÚÉó-ÊµÖÊÉó²éµÄÉúÐ§	523860 ¹ã¶«Ê¡¶«Ý¸ÊÐ³¤°²ÕòÎÚÉ³º£±õÂ·18ºÅ	±¾·¢Ã÷¹«¿ªÁËÒ»ÖÖÖ¸ÎÆÖ§¸¶·½·¨£¬Ó¦ÓÃÓÚ°üÀ¨Ö¸ÎÆÊ¶±ðÇøÓòµÄÖÕ¶ËÉè±¸£¬°üÀ¨£ºÏÔÊ¾µÚÒ»Ö§¸¶Ó¦ÓÃµÄÖ¸ÎÆÖ§¸¶½çÃæ£»µ±¼ì²âµ½ËùÊöÖ¸ÎÆÊ¶±ðÇøÓòµÄ´¥Ãþ²Ù×÷Ê±£¬Í¨¹ýËùÊöÖ¸ÎÆÊ¶±ðÇøÓò²É¼¯µÚÒ»Ö¸ÎÆÍ¼Ïñ£»»ñÈ¡ËùÊöµÚÒ»Ö§¸¶Ó¦ÓÃ¶ÔÓ¦µÄµÚÒ»Ëæ»úÊý£¬ÒÔ¼°´ÓËæ»úÊýºÍÖ¸ÎÆÄ£°åIDµÄ¼ÇÂ¼ÖÐ»ñÈ¡ËùÊöµÚÒ»Ëæ»úÊý¶ÔÓ¦µÄµÚÒ»Ö¸ÎÆÄ£°å£»µ±ËùÊöµÚÒ»Ö¸ÎÆÍ¼ÏñÓëËùÊöµÚÒ»Ö¸ÎÆÄ£°åÆ¥Åä³É¹¦Ê±£¬Ö´ÐÐÖ§¸¶²Ù×÷¡£±¾·¢Ã÷ÊµÊ©Àý»¹Ìá¹©ÁËÏà¹ØÉè±¸¡£²ÉÓÃ±¾·¢Ã÷ÊµÊ©Àý¿ÉÌáÉ…	Ö§¸¶
Ò»ÖÖ¸ß¾«¶È¿¹¸ÉÈÅÖ¸ÎÆÊ¶±ðÏµÍ³	ÇàµºÖÐ¼ø¸ß¿ÆÐÅÏ¢ÓÐÏÞ¹«Ë¾	2017-03-09	2017-06-30	CN106909910A	Ö÷·ÖÀàºÅ£ºG06K9/00(2006.01)I	ÔÚÉó-¹«¿ª	266000 É½¶«Ê¡ÇàµºÊÐ³ÇÑôÇø³¤³ÇÂ·89ºÅ²©Ê¿´´ÒµÔ°20ºÅÂ¥	±¾·¢Ã÷Ìá¹©ÁËÒ»ÖÖ¸ß¾«¶È¿¹¸ÉÈÅÖ¸ÎÆÊ¶±ðÏµÍ³£¬°üÀ¨²ãµþÉèÖÃµÄÊÖÖ¸´¥Ñ¹Ãæ°åºÍÖ¸ÎÆÊ¶±ðÄ£¿é£¬ËùÊöÖ¸ÎÆÊ¶±ðÄ£¿é°üÀ¨¶à¸öÏà»¥¶ÀÁ¢ÇÒ¼ä¸ôÉèÖÃµÄÖ¸ÎÆÊ¶±ð×ÓÄ£¿é£¬±¾·¢Ã÷ÔÚ½øÐÐÖ¸ÎÆÊ¶±ðÊ±£¬ÒªÇóÍ¬Ê±¶Ô¶à¸öÊÖÖ¸µÄÖ¸ÎÆ½øÐÐ²É¼¯£¬²¢´Ó²É¼¯µÃµ½µÄÖ¸ÎÆÍ¼ÏñÖÐÌáÈ¡¶à¸öÖ¸ÎÆÌØÕ÷ÐÅÏ¢½øÐÐÆ¥Åä£¬ÔÚ¶à¸öÖ¸ÎÆÌØÕ÷ÐÅÏ¢¾ùÆ¥Åä³É¹¦Ê±£¬È·¶¨±¾µØÖ¸ÎÆÊ¶±ð³É¹¦£¬ÓÉÓÚÃ¿´ÎÖ¸ÎÆÊ¶±ðÊ±¶¼ÐèÒª½øÐÐ¶à¸öÊÖÖ¸µÄÖ¸ÎÆÌØÕ÷ÐÅÏ¢Æ¥Åä£¬Òò´Ë¿É±ÜÃâµ¥¸öÖ¸ÎÆÒ×±»ÇÔÈ¡¶øµ¼ÖÂµ…	°²È«
Ò»ÖÖ´©´÷Ê½µç×ÓÉè±¸¼°Éí·ÝÈÏÖ¤ÏµÍ³	ÉîÛÚÊÐ½ðÁ¢Í¨ÐÅÉè±¸ÓÐÏÞ¹«Ë¾	2017-03-13	2017-07-07	CN106934265A	Ö÷·ÖÀàºÅ£ºG06F21/32(2013.01)I	ÔÚÉó-ÊµÖÊÉó²éµÄÉúÐ§	518000 ¹ã¶«Ê¡ÉîÛÚÊÐ¸£ÌïÇøÉîÄÏ´óµÀ7028ºÅÊ±´ú¿Æ¼¼´óÏÃ21Â¥£¨½öÏÞ°ì¹«£©	±¾·¢Ã÷ÊµÊ©Àý¹«¿ªÒ»ÖÖ´©´÷Ê½µç×ÓÉè±¸¼°Éí·ÝÈÏÖ¤ÏµÍ³£¬¸Ã´©´÷Ê½µç×ÓÉè±¸£¬ÓëÖÕ¶ËÅäºÏÒÔÊµÏÖÉí·ÝÈÏÖ¤£¬¸ÃËùÊö´©´÷Ê½µç×ÓÉè±¸°üÀ¨£ºµÚÒ»Í¨ÐÅµ¥Ôª£¬ÓÃÓÚ½ÓÊÕÀ´×ÔËùÊöÖÕ¶ËµÄÉí·ÝÈÏÖ¤ÇëÇó£»ºìÍâ·¢ÉäÆ÷£¬ÓÃÓÚÏòÈËÑÛ·¢ÉäºìÍâ¹â£»ºçÄ¤ÉãÏñÍ·£¬ÓÃÓÚÅÄÉãÈËÑÛÍ¼Ïñ£»¿ØÖÆµ¥Ôª£¬ÓÃÓÚÔÚËùÊö´©´÷Ê½µç×ÓÉè±¸½ÓÊÕµ½ËùÊöÉí·ÝÈÏÖ¤ÇëÇóºó¿ØÖÆºìÍâ·¢ÉäÆ÷·¢ÉäºìÍâ¹â£¬ºçÄ¤ÉãÏñÍ·ÅÄÉãÈËÑÛÍ¼Ïñ£¬ÇÒ´ÓËùÊöÈËÑÛÍ¼ÏñÖÐÌáÈ¡ºçÄ¤ÌØÕ÷ÐÅÏ¢¡£±¾·¢Ã÷ÊµÊ©ÀýµÄ´©´÷Ê½µ…	°²È«
Ò»ÖÖ½ðÈÚÒÆ¶¯Ö§¸¶ÓÃµç×ÓÃÜÂëÔ¿³×	³É¶¼ÓýÑ¿¿Æ¼¼ÓÐÏÞ¹«Ë¾	2017-03-13	2017-07-14	CN106951760A	Ö÷·ÖÀàºÅ£ºG06F21/32(2013.01)I	ÔÚÉó-ÊµÖÊÉó²éµÄÉúÐ§	610041 ËÄ´¨Ê¡³É¶¼ÊÐ¸ßÐÂÇøÌì¸®´óµÀÖÐ¶Î1388ºÅ1¶°8²ã866ºÅ	±¾·¢Ã÷Éæ¼°Ò»ÖÖ½ðÈÚÒÆ¶¯Ö§¸¶ÓÃµç×ÓÃÜÂëÔ¿³×£¬°üÀ¨µç×ÓÃÜÂëÔ¿³×±¾Ìå£¬µç×ÓÃÜÂëÔ¿³×±¾ÌåÁíÉè¸¨Öú²Ù¿Ø»ú¹¹£¬¸¨Öú²Ù¿Ø»ú¹¹Ç¶ÓÚµç×ÓÃÜÂëÔ¿³×±¾Ìåºó±íÃæ£¬¸¨Öú²Ù¿Ø»ú¹¹Óëµç×ÓÃÜÂëÔ¿³×±¾ÌåÍâ±íÃæ¼äÍ¨¹ý»¬¹ì»¬¶¯Á¬½Ó£¬¸¨Öú²Ù¿Ø»ú¹¹ÉÏÁíÉè·À»¤Ãæ°å£¬¸¨Öú²Ù¿Ø»ú¹¹°üÀ¨·À»¤¿Ç¡¢¸¨ÖúµçÔ´¡¢¿ØÖÆµçÂ·¡¢GNSS¶¨Î»×°ÖÃ¡¢Êý¾ÝÍ¨Ñ¶¶Ë¿Ú¼°Ö¸ÎÆÊ¶±ð×°ÖÃ£¬¸¨ÖúµçÔ´¡¢¿ØÖÆµçÂ·¡¢GNSS¶¨Î»×°ÖÃ¾ùÇ¶ÓÚ·À»¤¿ÇÄÚ£¬Êý¾ÝÍ¨Ñ¶¶Ë¿Ú¼°Ö¸ÎÆÊ¶±ð×°ÖÃ¾ùÇ¶ÓÚ·À»¤¿ÇÍâ±íÃ…	°²È«
POSÖÕ¶Ë¿ØÖÆ·½·¨ºÍ×°ÖÃ	Íò´ï°Ù»ã¿Æ¼¼£¨ÉîÛÚ£©ÓÐÏÞ¹«Ë¾	2017-03-14	2017-09-05	CN107133512A	Ö÷·ÖÀàºÅ£ºG06F21/44(2013.01)I	ÔÚÉó-ÊµÖÊÉó²éµÄÉúÐ§	518000 ¹ã¶«Ê¡ÉîÛÚÊÐÄÏÉ½Çø¿Æ·á2ºÅÌØ·¢ÐÅÏ¢¸Û´óÏÃA¶°4Â¥ÄÏ08-09µ¥Ôª	±¾·¢Ã÷Éæ¼°Ò»ÖÖPOSÖÕ¶Ë¿ØÖÆ·½·¨£¬¸Ã·½·¨°üÀ¨½ÓÊÕÊÚÈ¨¹¤¾ß·¢ËÍµÄÇëÇóÌØÕ÷ÐÅÏ¢µÄÖ¸Áî£»¸ù¾ÝÖ¸ÁîÉú³ÉµÚÒ»ÌØÕ÷ÐÅÏ¢£»ÏòÊÚÈ¨¹¤¾ß·µ»ØµÚÒ»ÌØÕ÷ÐÅÏ¢£»½ÓÊÕÊÚÈ¨¹¤¾ß·µ»ØµÄÓÉÊÚÈ¨»ú¸ù¾ÝµÚÒ»ÌØÕ÷ÐÅÏ¢Éú³ÉµÄÊÚÈ¨ÐÅÏ¢£»µ±ÊÚÈ¨ÐÅÏ¢Ð£Ñé³É¹¦Ê±£¬ÔòÌáÈ¡ÊÚÈ¨ÐÅÏ¢ÖÐµÄµÚ¶þÌØÕ÷ÐÅÏ¢£»µ±µÚ¶þÌØÕ÷ÐÅÏ¢ÓëµÚÒ»ÌØÕ÷ÐÅÏ¢ÏàÍ¬Ê±£¬Ôò±£´æÊÚÈ¨ÐÅÏ¢ºó£¬ÏòÊÚÈ¨¹¤¾ß·¢ËÍÊÚÈ¨³É¹¦µÄ½á¹û£»½ÓÊÕÊÚÈ¨¹¤¾ßµÄ×´Ì¬ÇÐ»»Ö¸Áî£¬²¢¸ù¾Ý×´Ì¬ÇÐ»»Ö¸ÁîÇÐ»»µ±Ç°×´Ì¬¡£ÉÏÊöPOSÖÕ¶…	°²È«
Ò»ÖÖÓ¦ÓÃÓÚ°²×¿ÏµÍ³µÄÇ¶ÈëÊ½°²È«Ö§¸¶POS»ú¼°·½·¨	»Ý¶û·á£¨ÖÐ¹ú£©ÐÅÏ¢ÏµÍ³ÓÐÏÞ¹«Ë¾	2017-03-23	2018-10-09	CN108629186A	Ö÷·ÖÀàºÅ£ºG06F21/57(2013.01)I	ÔÚÉó-ÊµÖÊÉó²éµÄÉúÐ§	301700 Ìì½òÊÐÎäÇåÇø¿ª·¢Çø¸£Ô´µÀ±±²à´´Òµ×Ü²¿»ùµØC18ºÅÂ¥ÄÏ¶°318	Ò»ÖÖÓ¦ÓÃÓÚ°²×¿ÏµÍ³µÄÇ¶ÈëÊ½°²È«Ö§¸¶POS»ú¼°·½·¨£¬°üÀ¨£¬Ó¦ÓÃÏµÍ³£¬ËùÊöÓ¦ÓÃÏµÍ³²ÉÓÃ°²×¿ÏµÍ³£¬ËùÊöÓ¦ÓÃÏµÍ³°üÀ¨Ó¦ÓÃ´¦ÀíÄ£¿éºÍÁ¬½ÓÓ¦ÓÃ´¦ÀíÄ£¿éµÄÎÞÏßÍ¨Ñ¶Ä£¿é¡¢ÏÔÊ¾ÆÁ¡¢ÉãÏñÍ·¡¢µç³Ø¡¢ÑïÉùÆ÷ÒÔ¼°·äÃùÆ÷£»°²È«ÏµÍ³£¬ËùÊö°²È«ÏµÍ³°üÀ¨°²È«´¦ÀíÄ£¿éºÍÁ¬½Ó°²È«´¦ÀíÄ£¿éµÄ´òÓ¡»ú¡¢´®¿ÚÍ¨Ñ¶¡¢´¥ÃþÄ£¿é¡¢ÃÜÂë¼üÅÌ¡¢¹úÃÜÐ¾Æ¬¡¢´ÅÌõ¶Á¿¨Æ÷¡¢IC¶Á¿¨Æ÷ÒÔ¼°·Ç½Ó¶Á¿¨Æ÷£»ËùÊö°²È«´¦ÀíÄ£¿é°üÀ¨²ð»ú×Ô»Ùµ¥Ôª¡¢¿ª»ú×Ô¼ìµ¥Ôª¡¢¹Ì¼þÉý¼¶µ¥Ôª¡¢EEPR…	°²È«
Ò»ÖÖ×¢ÈëÃØÔ¿Êý¾ÝµÄ·½·¨¼°ÏµÍ³	½Ý¿ªÍ¨Ñ¶£¨ÉîÛÚ£©ÓÐÏÞ¹«Ë¾	2017-03-24	2017-09-12	CN107153778A	Ö÷·ÖÀàºÅ£ºG06F21/12(2013.01)I	ÔÚÉó-ÊµÖÊÉó²éµÄÉúÐ§	518063 ¹ã¶«Ê¡ÉîÛÚÊÐÄÏÉ½Çø¿Æ¼¼ÄÏÊ®Â·Î÷¸ßÐÂÄÏÒ»µÀ±±TCL´óÏÃB×ù16Â¥	±¾·¢Ã÷¹«¿ªÁËÒ»ÖÖ×¢ÈëÃØÔ¿Êý¾ÝµÄ·½·¨¼°ÏµÍ³¡£¸Ã·½·¨»ùÓÚ·þÎñÆ÷¡¢×¢Èë¹¤¾ßºÍ´ý×¢ÈëÉè±¸£¬¸Ã·½·¨°üÀ¨£ºÓÉ×¢Èë¹¤¾ß´Ó·þÎñÆ÷»ñÈ¡ÃØÔ¿Êý¾Ý²¢¶ÔÃØÔ¿Êý¾Ý½øÐÐ¼ÓÃÜ£»ÓÉ×¢Èë¹¤¾ß½¨Á¢Óë´ý×¢ÈëÉè±¸µÄµ÷ÊÔÇÅ²¢Í¨¹ýµ÷ÊÔÇÅ¿ØÖÆ´ý×¢ÈëÉè±¸½øÈëÍøÂçÍ¨Ñ¶Ä£Ê½£»ÓÉ×¢Èë¹¤¾ß½¨Á¢Óë´ý×¢ÈëÉè±¸µÄÍøÂçÍ¨Ñ¶Á¬½Ó²¢Í¨¹ýÍøÂçÍ¨Ñ¶Á¬½ÓÏò´ý×¢ÈëÉè±¸´«ËÍ¼ÓÃÜºóµÄÃØÔ¿Êý¾Ý£¬ÆäÖÐ£¬ÍøÂçÍ¨Ñ¶Á¬½ÓÓÃÓÚ¼ÓÃÜ´«Êä£»ÓÉ´ý×¢ÈëÉè±¸¶Ô¼ÓÃÜºóµÄÃØÔ¿Êý¾Ý½øÐÐ½âÃÜ²¢½øÐÐ×¢Èë²Ù×…	°²È«
Ò»ÖÖ¶þÎ¬Âë°²È«·À»¤·½·¨¼°×°ÖÃ	Å¬±ÈÑÇ¼¼ÊõÓÐÏÞ¹«Ë¾	2017-03-24	2017-07-07	CN106934279A	Ö÷·ÖÀàºÅ£ºG06F21/51(2013.01)I	ÔÚÉó-ÊµÖÊÉó²éµÄÉúÐ§	518000 ¹ã¶«Ê¡ÉîÛÚÊÐÄÏÉ½Çø¸ßÐÂÇø±±»·´óµÀ9018ºÅ´ó×å´´ÐÂ´óÏÃAÇø6-8²ã¡¢10-11²ã¡¢BÇø6²ã¡¢CÇø6-10²ã	±¾·¢Ã÷¹«¿ªÁËÒ»ÖÖ¶þÎ¬Âë°²È«·À»¤·½·¨¼°×°ÖÃ£¬¸Ã·½·¨°üÀ¨²½Öè£ºÉ¨Ãè¶þÎ¬Âë²¢»ñÈ¡µ½¶þÎ¬ÂëÐÅÏ¢£»¸ù¾Ý»ñÈ¡µ½µÄ¶þÎ¬ÂëÐÅÏ¢£¬È·¶¨ËùÊö¶þÎ¬ÂëÐÅÏ¢¶ÔÓ¦µÄ·ÖÀàÊôÐÔÐÅÏ¢£»¸ù¾Ý¶þÎ¬ÂëµÄ·ÖÀàÊôÐÔÐÅÏ¢£¬»ñÈ¡µ½ËùÊö¶þÎ¬Âë·ÖÀàÊôÐÔÐÅÏ¢Ïà¶ÔÓ¦µÄ°²È«²ßÂÔÐÅÏ¢£¬²¢¸ù¾Ý¸Ã°²È«²ßÂÔÐÅÏ¢Ö´ÐÐ°²È«·À»¤¡£±¾·¢Ã÷¹«¿ªµÄ¶þÎ¬Âë°²È«·À»¤·½·¨¼°×°ÖÃ£¬¶ÔÖ§¸¶½»Ò×ÐÅÏ¢¡¢Á´½ÓÐÅÏ¢ÒÔ¼°Ó¦ÓÃÏÂÔØÐÅÏ¢Ìá¹©°²È«¹ÜÀí²ßÂÔ£¬´Ó¶øÓÐÐ§µÄ¼õÉÙÓÃ»§É¨Âë¶þÎ¬ÂëÐÅÏ¢µ¼ÖÂµÄ²»°²È…	°²È«
Ò»ÖÖ»ùÓÚÖ¸ÎÆÊ¶±ðµÄÖ§¸¶ÏµÍ³	¹ã¶«¹¤Òµ´óÑ§	2017-03-24	2017-08-08	CN107025561A	Ö÷·ÖÀàºÅ£ºG06Q20/40(2012.01)I	ÔÚÉó-ÊµÖÊÉó²éµÄÉúÐ§	510062 ¹ã¶«Ê¡¹ãÖÝÊÐÔ½ÐãÇø¶«·ç¶«Â·729ºÅ	±¾·¢Ã÷Éæ¼°Ò»ÖÖ»ùÓÚÖ¸ÎÆÊ¶±ðµÄÖ§¸¶ÏµÍ³£¬°üÀ¨Ö¸ÎÆ²É¼¯Ä£¿é¡¢¸öÈËÐÅÏ¢Êý¾Ý¿â¡¢Ö¸ÎÆÆ¥ÅäÑéÖ¤Ä£¿é¡¢Êý¾ÝÇåËãÖÐÐÄ¡¢¸öÈËÕË»§ÏµÍ³¡¢Ö¸ÎÆË¢¿¨ÖÕ¶ËÒÔ¼°ÊµÊ±Êý¾Ý´«ÊäÄ£¿é¡£±¾·¢Ã÷Í¨¹ýÖ¸ÎÆÊ¶±ðÏû·Ñ´úÌæË¢¿¨Ïû·Ñ£¬²»µ«Ö§¸¶¿ì½Ý£¬¶øÇÒ°²È«ÏµÊý¸ß¡£	°²È«
Ò»ÖÖ°²È«·¢·ÅU¶ÜµÄ·½·¨¼°ÏµÍ³	¹ã¶«Íø½ð¿Ø¹É¹É·ÝÓÐÏÞ¹«Ë¾	2017-03-24	2018-02-16	CN107705198A	Ö÷·ÖÀàºÅ£ºG06Q40/02(2012.01)I	ÔÚÉó-ÊµÖÊÉó²éµÄÉúÐ§	510000 ¹ã¶«Ê¡¹ãÖÝÊÐÌìºÓÇøÖé½­¶«Â·28ºÅ19¡¢20²ã	±¾·¢Ã÷Éæ¼°Ò»ÖÖ°²È«·¢·ÅU¶ÜµÄ·½·¨¼°ÏµÍ³£¬·½·¨°üÀ¨£º½ÓÊÕÓÃ»§µÄÉêÇëÇëÇó£¬Ö®ºóÊÕ¼¯ÓÃ»§µÄ¸öÈËÐÅÏ¢¼ÇÎª³õ´Î¸öÈËÐÅÏ¢£¬½«¸Ã³õ´Î¸öÈËÐÅÏ¢·¢ËÍÖÁ·þÎñÆ÷½øÐÐ±£´æ£»½ÓÊÕÀ´×ÔÓÃ»§µÄU¶Ü¼¤»îÇëÇóºóÆô¶¯U¶Ü¼¤»î³ÌÐòÒÔ¶ÔU¶Ü½øÐÐ¼¤»î£»½ÓÊÕÓÃ»§µÄ¸öÈËÐÅÏ¢¼ÇÎªÐÂ¸öÈËÐÅÏ¢£¬²¢·¢ËÍ¸ÃÐÂ¸öÈËÐÅÏ¢ÖÁ·þÎñÆ÷£¬ÒÔÊ¹·þÎñÆ÷½«ÐÂ¸öÈËÐÅÏ¢Óë³õ´Î¸öÈËÐÅÏ¢½øÐÐ±È¶Ô£¬ÅÐ¶ÏÐÂ¸öÈËÐÅÏ¢Óë³õ´Î¸öÈËÐÅÏ¢ÊÇ·ñÒ»ÖÂ£¬ÈôÊÇ£¬ÔòÌáÊ¾ÓÃ»§ÏÂÔØÖ¤ÊéÒÔ³É¹¦¼¤»îU¶Ü£¬·ñÔò£¬Ìá…	°²È«
ÒøÐÐ´óÌü×ÔÖú·þÎñÖÇÄÜ»úÆ÷ÈË	ÈüÌØË¹ÐÅÏ¢¿Æ¼¼¹É·ÝÓÐÏÞ¹«Ë¾	2017-03-27	2018-10-16	CN108664781A	Ö÷·ÖÀàºÅ£ºG06F21/32(2013.01)I	ÔÚÉó-¹«¿ª	210042 ½­ËÕÊ¡ÄÏ¾©ÊÐÐþÎäÇøÐþÎä´óµÀ699-22ºÅ18´±	±¾·¢Ã÷Éæ¼°Ò»ÖÖÒøÐÐ´óÌü×ÔÖú·þÎñÖÇÄÜ»úÆ÷ÈË£¬ÆäÖÐ¸Ã»úÆ÷ÈËÄÚ°²×°Ò»¸öÓëÒøÐÐÏµÍ³ÁªÍ¨µÄ¼ÆËã»ú£¬¼ÆËã»úÉÏÁ¬½ÓÉãÏñÍ·¡¢²å¿¨½Ó¿Ú¡¢Ö¸ÎÆ¶ÁÈ¡Æ÷¡¢Æ«¹âÆÁºÍÊäÈë¼üÅÌ¡£ÕâÖÖÒøÐÐ´óÌü×ÔÖú·þÎñÖÇÄÜ»úÆ÷ÈËÔÚÊ¹ÓÃµÄÊ±ºò£¬Í¨¹ý¸Ã»úÆ÷ÈËÓÃ»§¾ÍÄÜ½øÐÐ¼òµ¥µÄÒµÎñ²Ù×÷£¬Ìá¸ßÒ²ÒøÐÐ´¦ÀíÒµÎñµÄÊ±Ð§ÐÔ£¬²¢ÇÒÍ¨¹ý´óÌü¾­ÀíµÄÊÚÈ¨£¬±ÜÃâÁË²»·¨·Ö×Ó¶ñÒâ°ìÀíÒµÎñµÄÇé¿ö·¢Éú£¬±£Ö¤ÓÃ»§µÄ°²È«¡£	°²È«
ÐÅÏ¢¼ø¶¨·½·¨¡¢×°ÖÃºÍÖÕ¶ËÉè±¸	±±¾©Ææ»¢¿Æ¼¼ÓÐÏÞ¹«Ë¾	2017-03-29	2017-07-25	CN106980778A	Ö÷·ÖÀàºÅ£ºG06F21/30(2013.01)I	ÔÚÉó-ÊµÖÊÉó²éµÄÉúÐ§	100088 ±±¾©ÊÐÎ÷³ÇÇøÐÂ½Ö¿ÚÍâ´ó½Ö28ºÅD×ù112ÊÒ£¨µÂÊ¤Ô°Çø£©	±¾·¢Ã÷ÊµÊ©Àý¹«¿ªÁËÒ»ÖÖÐÅÏ¢¼ø¶¨·½·¨¡¢×°ÖÃºÍÖÕ¶ËÉè±¸¡£ÆäÖÐ·½·¨°üÀ¨£º´ÓÓÃ»§½çÃæ»ñÈ¡´ý¼ø¶¨µÄÐÅÏ¢£»»ùÓÚËùÊö´ý¼ø¶¨µÄÐÅÏ¢µÄÀàÐÍ£¬»ñµÃ¶ÔËùÊö´ý¼ø¶¨µÄÐÅÏ¢µÄ°²È«ÐÔ¼ø¶¨½á¹û£»ÔÚÓÃ»§½çÃæÉÏÏÔÊ¾ËùÊö°²È«ÐÔ¼ø¶¨½á¹û¡£±¾·¢Ã÷ÊµÊ©ÀýÎªÓÃ»§Ìá¹©ÁË¶Ô¸÷ÖÖ¿ÉÒÉÐÅÏ¢°²È«ÐÔµÄ¼ø¶¨Í¾¾¶£¬Í¨¹ý¶Ô¸÷ÖÖÐÅÏ¢Ìá¹©×¨ÒµÐÔµÄÅÐ¶Ï£¬¿ÉÒÔÊµÏÖ¶Ôµç»°ºÅÂë¡¢qqºÅ¡¢ÒøÐÐ¿¨ºÅ¡¢ÍøÖ·Á´½Ó¡¢Î¢ÐÅºÍ¶ÌÐÅÄÚÈÝµÈ¶àÖÖÐÅÏ¢°²È«ÐÔµÄ¼ø¶¨£¬´Ó¶øÊ¶±ð³öÕ©Æ­µç»°¡¢É§ÈÅµç»°¡…	°²È«
Ò»ÖÖÖ§¸¶·½·¨¡¢×°ÖÃºÍÉè±¸	Å¬±ÈÑÇ¼¼ÊõÓÐÏÞ¹«Ë¾	2017-03-29	2017-08-18	CN107066863A	Ö÷·ÖÀàºÅ£ºG06F21/32(2013.01)I	ÔÚÉó-ÊµÖÊÉó²éµÄÉúÐ§	518000 ¹ã¶«Ê¡ÉîÛÚÊÐÄÏÉ½Çø¸ßÐÂÇø±±»·´óµÀ9018ºÅ´ó×å´´ÐÂ´óÏÃAÇø6-8²ã¡¢10-11²ã¡¢BÇø6²ã¡¢CÇø6-10²ã	±¾·¢Ã÷ÊµÊ©Àý¹«¿ªÁËÒ»ÖÖÖ§¸¶·½·¨£¬ËùÊö·½·¨°üÀ¨£ºÔÚÖÕ¶Ë´¦ÓÚËøÆÁ×´Ì¬ÏÂ£¬»ñÈ¡Í¼Ïñ²É¼¯µ¥Ôª²É¼¯µÄÉúÎïÌØÕ÷ÐÅÏ¢£»ÅÐ¶Ï»ñÈ¡µÄÉúÎïÌØÕ÷ÐÅÏ¢ÓëÔ¤ÉèÉúÎïÌØÕ÷ÐÅÏ¢ÊÇ·ñÆ¥Åä£»ÈôËùÊö»ñÈ¡µÄÉúÎïÌØÕ÷ÐÅÏ¢ÓëËùÊöÔ¤ÉèÉúÎïÌØÕ÷ÐÅÏ¢Æ¥Åä£¬ÔòÏÔÊ¾Ö§¸¶Ò³ÃæÒÔÍê³ÉÖ§¸¶¹ý³Ì£»ÆäÖÐ£¬ËùÊöÖ§¸¶Ò³ÃæÎªÓëËùÊöÔ¤ÉèÉúÎïÌØÕ÷ÐÅÏ¢Ïà¹ØÁªµÄ¾ßÓÐÖ§¸¶¹¦ÄÜµÄÓ¦ÓÃÖÐµÄÒ³Ãæ¡£±¾·¢Ã÷ÊµÊ©ÀýÍ¬Ê±»¹¹«¿ªÁËÒ»ÖÖÖ§¸¶×°ÖÃÒÔ¼°Ö§¸¶Éè±¸¡£	Ö§¸¶
Ò»ÖÖÐÅÏ¢´¦Àí·½·¨¼°ÒÆ¶¯ÖÕ¶Ë	Î¬ÎÖÒÆ¶¯Í¨ÐÅÓÐÏÞ¹«Ë¾	2017-03-30	2017-07-28	CN106991311A	Ö÷·ÖÀàºÅ£ºG06F21/32(2013.01)I	ÔÚÉó-×¨ÀûÉêÇëÈ¨¡¢×¨ÀûÈ¨µÄ×ªÒÆ	523860 ¹ã¶«Ê¡¶«Ý¸ÊÐ³¤°²ÕòÎÚÉ³²½²½¸ß´óµÀ283ºÅ	±¾·¢Ã÷Éæ¼°Í¨ÐÅ¼¼ÊõÁìÓò£¬Ìá¹©Ò»ÖÖÐÅÏ¢´¦Àí·½·¨¼°ÒÆ¶¯ÖÕ¶Ë£¬ÒÔ½â¾öÒÆ¶¯ÖÕ¶ËÔÚ½øÐÐÖ§¸¶Ê±£¬ÐÅÏ¢°²È«ÐÔ²îµÄÎÊÌâ¡£ÐÅÏ¢´¦Àí·½·¨°üÀ¨£º¼ì²âÒÆ¶¯ÖÕ¶ËµÄµ±Ç°ÏÔÊ¾½çÃæÊÇ·ñ°üº¬Ö§¸¶ÐÅÏ¢£»Èô¼ì²âµ½µ±Ç°ÏÔÊ¾½çÃæ°üº¬Ö§¸¶ÐÅÏ¢£¬Ôò¶ÔÖ§¸¶ÐÅÏ¢½øÐÐÄ£ºý»¯´¦Àí£¬²¢ÏÔÊ¾Ä£ºý»¯´¦ÀíºóµÄÖ§¸¶ÐÅÏ¢£»»ñÈ¡ÓÃ»§µÄºçÄ¤ÐÅÏ¢£»ÅÐ¶ÏÓÃ»§µÄºçÄ¤ÐÅÏ¢ÊÇ·ñÓëÔ¤ÉèµÄºçÄ¤ÐÅÏ¢Æ¥Åä£»ÈôÓÃ»§µÄºçÄ¤ÐÅÏ¢ÓëÔ¤ÉèµÄºçÄ¤ÐÅÏ¢Æ¥Åä£¬ÔòÏÔÊ¾Ö§¸¶ÐÅÏ¢¡£ÕâÑù£¬µ±ÓÃ»§Ê¹ÓÃÒÆ¶¯ÖÕ¶…	°²È«
Ò»ÖÖÆóÒµ²ÆÎñ¹ÜÀí¿ØÖÆÏµÍ³	Ì«²Öºè²ßÌÚ´ïÍøÂç¿Æ¼¼ÓÐÏÞ¹«Ë¾	2017-03-30	2017-09-01	CN107123039A	Ö÷·ÖÀàºÅ£ºG06Q40/00(2012.01)I	ÔÚÉó-ÊµÖÊÉó²éµÄÉúÐ§	215400 ½­ËÕÊ¡ËÕÖÝÊÐÌ«²ÖÊÐ¿Æ½ÌÐÂ³Ç½¡ÐÛÂ·20ºÅ	±¾·¢Ã÷¹«¿ªÁËÒ»ÖÖÆóÒµ²ÆÎñ¹ÜÀí¿ØÖÆÏµÍ³£¬°üÀ¨Êý¾ÝÊäÈë¶Ë£¬ÓÃÓÚÔÚÓÐÐÂ²ÆÎñÊý¾ÝµÄÊäÈëÉêÇëÊ±£¬ÔÊÐí²¢Íê³ÉÐÂ²ÆÎñÊý¾ÝµÄÊäÈë£»Ô¤¶¨ÒåÄ£¿é£¬ÓÃÓÚ×Ô¶¯Éú³ÉÏà¶ÔÓ¦µÄ²ÆÎñ±êÇ©£¬¶ÔÐÂ²ÆÎñÊý¾Ý¼°Æä²ÆÎñ±êÇ©½øÐÐÔ¤¶¨Òå£»Êý¾Ý¿â£¬ÓÃÓÚÒÀ¾Ý²ÆÎñ±êÇ©½«ÐÂ²ÆÎñÊý¾Ý·ÖÃÅ±ðÀàµÄ¹éÖÃÔÚÊý¾Ý¿âµÄ²»Í¬ÇøÓò£»²ÆÎñÌáÈ¡¿â£¬ÓÃÓÚÒÀ¾Ý²ÆÎñ±êÇ©ÌáÈ¡Ïà¹Ø²ÆÎñÊý¾Ý£»ÖÕ¶Ë¹ÜÀíÏµÍ³ÅäÖÃÓÐ½»»¥½çÃæ£¬ÓÃÓÚÓÃ»§Í¨¹ý½»»¥½çÃæÍê³É²Ù×÷Ö¸ÁîµÄÊäÈë¡£±¾·¢Ã÷ÔÚÓÐÐÂ²ÆÎñÊý¾ÝÊäÈ…	Êý¾Ý·ÖÎö
»ú¶¥ºÐ°²È«±£»¤·½·¨¼°ÏµÍ³	ÉîÛÚÊÐ¾ÅÖÞµçÆ÷ÓÐÏÞ¹«Ë¾	2017-03-31	2018-10-16	CN108664776A	Ö÷·ÖÀàºÅ£ºG06F21/31(2013.01)I	ÔÚÉó-¹«¿ª	518057 ¹ã¶«Ê¡ÉîÛÚÊÐÄÏÉ½Çø¸ßÐÂ¿Æ¼¼Ô°ÄÏÇø¿Æ¼¼ÄÏÊ®¶þÂ·¾ÅÖÞµçÆ÷´óÏÃÁùÂ¥	±¾·¢Ã÷Éæ¼°Ò»ÖÖ»ú¶¥ºÐ°²È«±£»¤·½·¨¼°ÏµÍ³£¬Îª»ú¶¥ºÐÖÐÓ¦ÓÃºÍ¹¦ÄÜÉèÖÃ±£»¤ÃÜÔ¿À´Ôö¼ÓÈ¨ÏÞ¹ÜÀí£¬¶ÔÓÚÑ¡¶¨µÄÓ¦ÓÃºÍ¹¦ÄÜ£¬ÐèÒª×¼È·ÊäÈë±£»¤ÃÜÔ¿²ÅÄÜ»ñÈ¡Ê¹ÓÃÈ¨ÏÞ£¬Èç¹ûÊäÈë´íÎóÔò²»ÄÜÊ¹ÓÃ£¬ÇÒÊäÈë´íÎó¶à´Î»ú¶¥ºÐ½«±»Ëø¶¨²»ÄÜ½øÐÐ²Ù×÷£¬´Ó¶ø¼«´óµÄÌá¸ß»ú¶¥ºÐµÄ°²È«ÐÔ£¬¸üºÃµÄ±£»¤ÓÃ»§µÄÒþË½ºÍ²Æ²ú°²È«£¬±ÜÃâ¸øÓÃ»§Ê¹ÓÃµÄ´øÀ´·çÏÕ£¬¼«´óµÄ±ãÀûÁËÓÃ»§Ê¹ÓÃ¡£	°²È«
Ò»ÖÖ½ðÈÚÉè±¸µÄÖÇÄÜ½»»¥·½·¨¼°ÏµÍ³	ÉîÛÚâù»¯µçÄÔ¹É·ÝÓÐÏÞ¹«Ë¾	2017-04-01	2017-09-19	CN107179827A	Ö÷·ÖÀàºÅ£ºG06F3/01(2006.01)I	ÔÚÉó-ÊµÖÊÉó²éµÄÉúÐ§	518000 ¹ã¶«Ê¡ÉîÛÚÊÐÄÏÉ½Çøºóº£´óµÀ2388ºÅâù»¯½ðÈÚ¿Æ¼¼´óÏÃ26Â¥	±¾·¢Ã÷ÊÊÓÃÓÚ½ðÈÚÀà×ÔÖúÉè±¸Ó¦ÓÃ¼¼ÊõÁìÓò£¬Ìá¹©ÁËÒ»ÖÖ½ðÈÚÉè±¸µÄÖÇÄÜ½»»¥·½·¨¼°ÏµÍ³£¬°üÀ¨£º¼ì²âµ±Ç°ÓÃ»§Óë½ðÈÚÉè±¸Ö®¼äµÄ¾àÀë£¬¸ù¾ÝËùÊö¾àÀëÓëÔ¤ÉèµÄµÚÒ»¾àÀëãÐÖµµÄ¹ØÏµ£¬Ñ¡ÔñÊÇ·ñµãÁÁ½ðÈÚÉè±¸µÄÕÕÃ÷ÉèÊ©£»¼ÌÐø¼ì²âµ±Ç°ÓÃ»§Óë½ðÈÚÉè±¸Ö®¼äµÄ¾àÀë£¬ÔÚÅÐ¶Ï³öËùÊö¾àÀëÐ¡ÓÚÔ¤ÉèµÄµÚ¶þ¾àÀëãÐÖµÊ±£¬»ñÈ¡µ±Ç°ÓÃ»§ÐÅÏ¢£»¸ù¾Ýµ±Ç°ÓÃ»§ÐÅÏ¢ÍÆËÍ²¢ÏÔÊ¾ÏàÓ¦µÄÒµÎñ¡£ÔÚµ±Ç°ÓÃ»§Óë½ðÈÚÉè±¸Ö®¼ä¾àÀëÐ¡ÓÚµÚÒ»¾àÀëãÐÖµÊ±£¬²ÅµãÁÁ½ðÈÚÉè±¸µÄÕÕÃ÷ÉèÊ…	Êý¾Ý·ÖÎö
»ùÓÚÓ¦ÓÃÏµÍ³ÒµÎñ´¦ÀíÂß¼­µÄÔ´´úÂëÔ½È¨¼ì²â·½·¨¼°×°ÖÃ	ÖÐ¹úÃñÉúÒøÐÐ¹É·ÝÓÐÏÞ¹«Ë¾	2017-04-10	2017-08-29	CN107103239A	Ö÷·ÖÀàºÅ£ºG06F21/56(2013.01)I	ÔÚÉó-ÊµÖÊÉó²éµÄÉúÐ§	100031 ±±¾©ÊÐÎ÷³ÇÇø¸´ÐËÃÅÄÚ´ó½Ö2ºÅ	±¾·¢Ã÷Ìá¹©ÁËÒ»ÖÖ»ùÓÚÓ¦ÓÃÏµÍ³ÒµÎñ´¦ÀíÂß¼­µÄÔ´´úÂëÔ½È¨¼ì²â·½·¨¼°×°ÖÃ¡£¸Ã·½·¨°üÀ¨£º¶ÔÓ¦ÓÃÏµÍ³Ô´´úÂë½øÐÐ½âÎö£¬²¢½«½âÎöµ½µÄÔ´´úÂëÐÅÏ¢²ÉÓÃÓï·¨Ê÷±íÊ¾£»¶ÔÓï·¨Ê÷½øÐÐÐÅÏ¢Á÷·ÖÎö£¬ÒÔ»ñµÃÐÅÏ¢Á÷ÐÅÏ¢£»¸ù¾ÝÔ¤ÉèµÄÔ½È¨¼ì²â²ßÂÔºÍÐÅÏ¢Á÷ÐÅÏ¢£¬¶ÔÓ¦ÓÃÏµÍ³Ô´´úÂë½øÐÐÔ½È¨¼ì²â£»Êä³öÔ½È¨¸ß·çÏÕµÄ²ÎÊý¼°Ïà¹ØÐÅÏ¢¡£ÓÉÓÚ²ÉÓÃÐÅÏ¢Á÷¶Ô²ÎÊý½øÐÐÔ½È¨¼ì²â£¬ÓëÓ¦ÓÃÏµÍ³ÒµÎñÂß¼­½ôÃÜÏà¹Ø£¬ÄÜ¹»¶ÔÔ´´úÂëµÄÂß¼­½øÐÐÉîÈë·ÖÎö£¬ËùÒÔÄÜ¹»¼õÉÙÎó±¨ÂÊ£¬Ì…	°²È«
»ùÓÚ²ÎÊýºÍÐÅÏ¢Á÷µÄÔ´´úÂëÔ½È¨¼ì²â·½·¨¼°×°ÖÃ	ÖÐ¹úÃñÉúÒøÐÐ¹É·ÝÓÐÏÞ¹«Ë¾	2017-04-10	2017-09-05	CN107133518A	Ö÷·ÖÀàºÅ£ºG06F21/56(2013.01)I	ÔÚÉó-ÊµÖÊÉó²éµÄÉúÐ§	100031 ±±¾©ÊÐÎ÷³ÇÇø¸´ÐËÃÅÄÚ´ó½Ö2ºÅ	±¾·¢Ã÷Ìá¹©ÁËÒ»ÖÖ»ùÓÚ²ÎÊýºÍÐÅÏ¢Á÷µÄÔ´´úÂëÔ½È¨¼ì²â·½·¨¼°×°ÖÃ£¬¸Ã·½·¨°üÀ¨£º¶ÔÓ¦ÓÃÆ½Ì¨Ô´´úÂë½øÐÐ½âÎö£¬²¢½«½âÎöµ½µÄÔ´´úÂëÐÅÏ¢²ÉÓÃÓï·¨Ê÷±íÊ¾£»¶ÔÓï·¨Ê÷½øÐÐÐÅÏ¢Á÷·ÖÎö£¬ÒÔ»ñµÃÐÅÏ¢Á÷ÐÅÏ¢£»¸ù¾ÝÔ¤ÉèµÄÔ½È¨¼ì²â²ßÂÔºÍÐÅÏ¢Á÷ÐÅÏ¢£¬¶ÔÓ¦ÓÃÆ½Ì¨Ô´´úÂë½øÐÐÔ½È¨¼ì²â£»Êä³öÔ½È¨¸ß·çÏÕµÄ²ÎÊý¼°Ïà¹ØÐÅÏ¢¡£ÓÉÓÚ²ÉÓÃÐÅÏ¢Á÷¶Ô²ÎÊý½øÐÐÔ½È¨¼ì²â£¬ÓëÓ¦ÓÃÆ½Ì¨ÒµÎñÂß¼­½ôÃÜÏà¹Ø£¬ÄÜ¹»¶ÔÔ´´úÂëµÄÂß¼­½øÐÐÉîÈë·ÖÎö£¬ËùÒÔÄÜ¹»¼õÉÙÎó±¨ÂÊ£¬Ìá¸ß¼ì²âµ…	°²È«
Ò»ÖÖÓ²¼þÖ¸Áîµ÷ÓÃµÄ¿ØÖÆ·½·¨¼°ÏµÍ³	ÉîÛÚâù»¯µçÄÔ¹É·ÝÓÐÏÞ¹«Ë¾	2017-04-10	2017-09-15	CN107169376A	Ö÷·ÖÀàºÅ£ºG06F21/71(2013.01)I	ÔÚÉó-ÊµÖÊÉó²éµÄÉúÐ§	518000 ¹ã¶«Ê¡ÉîÛÚÊÐÄÏÉ½Çøºóº£´óµÀ2388ºÅâù»¯½ðÈÚ¿Æ¼¼´óÏÃ26Â¥	±¾·¢Ã÷ÊÊÓÃÓÚ½ðÈÚÀàÉè±¸¿ØÖÆ¼¼ÊõÁìÓò£¬Ìá¹©ÁËÒ»ÖÖÓ²¼þÖ¸Áîµ÷ÓÃµÄ¿ØÖÆ·½·¨¼°ÏµÍ³£¬°üÀ¨£º½ÓÊÕÓ²¼þÖ¸Áî£¬¸ù¾ÝËùÊöÓ²¼þÖ¸Áî»ñÈ¡Ó²¼þÖ¸Áîµ÷ÓÃÐ­Òé£»µ÷ÓÃ¼ÓÃÜÒò×Ó£¬¸ù¾ÝËùÊö¼ÓÃÜÒò×ÓºÍËùÊöÓ²¼þÖ¸Áîµ÷ÓÃÐ­ÒéÈ·¶¨ËùÊöÓ²¼þÖ¸ÁîÊÇ·ñÎªºÏ·¨Ö¸Áî£»ÔÚÈ·¶¨ËùÊöÓ²¼þÖ¸ÁîÎªºÏ·¨Ö¸Áîºó£¬Ö´ÐÐËùÊöÓ²¼þÖ¸Áî¡£ËùÊö¼ÓÃÜÒò×Ó¡¢ÐéÄâÖ¸Áî¿ØÖÆÂë¼°Ö¸Áî¿ØÖÆÂë±»Ô¤ÏÈ¹Ì»¯ÔÚ×ÔÖúÉè±¸ÖÐ²»¿É±»ÎÞÈ¨ÏÞÈËÔ±ËæÒâÐÞ¸Ä£¬ÓÐÐ§µÄ·ÀÖ¹ÁË×ÔÖúÉè±¸µÄÓ²¼þÖ¸Áîµ÷ÓÃÐ­Òé±»¿úÌ…	°²È«
Ò»ÖÖ±ã½Ý²¢ÇÒ°²È«µÄPOS»ú	³É¶¼ÀíµÀ¿Æ¼¼ÓÐÏÞ¹«Ë¾	2017-04-12	2017-08-04	CN107016808A	Ö÷·ÖÀàºÅ£ºG07G1/00(2006.01)I	ÔÚÉó-ÊµÖÊÉó²éµÄÉúÐ§	610000 ËÄ´¨Ê¡³É¶¼ÊÐ³É»ªÇø½¨²ÄÂ·39ºÅ1¶°13²ã1313ºÅ	±¾·¢Ã÷¹«¿ªÁËÒ»ÖÖ±ã½Ý²¢ÇÒ°²È«µÄPOS»ú£¬°üÀ¨POS»ú£¬ËùÊöPOS»úµÄ³öÆ±¿ÚÉÏÁ¬½ÓÒ»¸öÍ¨²Û£¬ËùÊöÍ¨²ÛµÄÉÏ¶ËÁ¬½ÓÒ»¸öË®Æ½µÄÖ§³Å°å£¬ËùÊöÍ¨²ÛµÄµ×²¿µÄ¿ª¿ÚÔÚPOS»úÉÏµÄ³öÆ±¿Ú´¦£¬ËùÊöÍ¨²ÛµÄÉÏ¶ËµÄ¿ª¿ÚÔÚÖ§³Å°åÉÏ£¬ËùÊöPOS»ú¿¿½ü³öÆ±¿Ú²¢ÇÒÓëÆäÏà»¥Æ½ÐÐµÄ²à±ßÉÏÁ¬½ÓÓÐÖ§³Å¸Ë£¬ËùÊöÖ§³Å¸ËµÄÁíÒ»¶ËÓëÖ§³Å°åÁ¬½Ó£¬ËùÊöÓëÁ¬½ÓÓÐÖ§³Å¸ËµÄÒ»±ßÏà¶ÔµÄÒ»±ßÉÏÁ¬½ÓÓÐÓÃÓÚÕÚµ²POS»úÉÏÃÜÂëÊäÈë´¦µÄµ²°å£¬ËùÊöµ²°åÓëË®Æ½ÃæµÄ¼Ð½ÇÎª15¶È£¬²¢ÇÒËùÊöµ²°åµÄÁ…	°²È«
Ò»ÖÖ»ùÓÚZigBee¼¼ÊõµÄÒøÐÐÈËÁ³ÐÅ´û·þÎñÏµÍ³	áéÖÝÑ§Ôº	2017-04-13	2017-08-29	CN107103531A	Ö÷·ÖÀàºÅ£ºG06Q40/02(2012.01)I	ÔÚÉó-ÊµÖÊÉó²éµÄÉúÐ§	324000 Õã½­Ê¡áéÖÝÊÐ¾Å»ª±±´óµÀ78ºÅ	±¾·¢Ã÷Ìá¹©ÁËÒ»ÖÖ»ùÓÚZigBee¼¼ÊõµÄÒøÐÐÈËÁ³ÐÅ´û·þÎñÏµÍ³£¬ÊôÓÚÒøÐÐÐÅÏ¢×ª»»ÁìÓò¡£±¾»ùÓÚZigBee¼¼ÊõµÄÒøÐÐÈËÁ³ÐÅ´û·þÎñÏµÍ³£¬°üº¬ÒÔÏÂ²½Öè£º(1)¡¢»ñÈ¡ÈÎÎñÐÅÏ¢£º·þÎñÆ÷»ñ¿Í»§ÈÎÎñÐÅÏ¢£»(2)¡¢ÈËÁ³Ê¶±ð£º¶Ô¿Í»§½øÐÐÈËÁ³Ê¶±ð£¬²¢¶ÔÊäÈëÈËÁ³Í¼ÏñµÄÉí·ÝÓëÐû³ÆµÄÉí·ÝÊÇ·ñÏà·û×÷³öÅÐ¶Ï£»(3)¡¢ZigBee¶¨Î»£º¶ÔÍâ³öÒøÐÐÈËÔ±¶¨Î»£¬ÓÉ·þÎñÆ÷Õë¶Ô¾Í½üÒøÐÐÈËÔ±·¢ËÍÈÎÎñÐÅÏ¢£»(4)¡¢¼ðÑ¡ÓÅ»¯Â·¾¶£ºÓïÒôµ¼ÏòÒøÐÐÈËÔ±£»(5)¡¢µ½´ï¿Í»§Î»ÖÃ£ºÒøÐÐÈËÔ±Óë…	½è´û
Ò»ÖÖ²Ù×÷ÏµÍ³°²È«·À¿ØµÄ·½·¨¡¢×°ÖÃ¼°ÏµÍ³	¹ã¶«ÀË³±´óÊý¾ÝÑÐ¾¿ÓÐÏÞ¹«Ë¾	2017-04-14	2017-08-01	CN106997435A	Ö÷·ÖÀàºÅ£ºG06F21/56(2013.01)I	ÔÚÉó-ÊµÖÊÉó²éµÄÉúÐ§	510640 ¹ã¶«Ê¡¹ãÖÝÊÐÌìºÓÇø»ÆÆÒ´óµÀÎ÷Æ½ÔÆÂ·163ºÅAËþ9²ã×Ô±à01µ¥Ôª	±¾·¢Ã÷Ìá¹©ÁËÒ»ÖÖ²Ù×÷ÏµÍ³°²È«·À¿ØµÄ·½·¨¡¢×°ÖÃ¼°ÏµÍ³£¬¸Ã·½·¨£¬°üÀ¨£ºÔ¤ÏÈ¸ù¾Ý²Ù×÷ÏµÍ³ºÍÓ¦ÓÃµÄÌØÕ÷ÐÅÏ¢ÉèÖÃ°²È«²ßÂÔºÍ°×Ãûµ¥£»»¹°üÀ¨£º»ñÈ¡Ã¿¸ö´ý·À¿ØÄ¿±êÉè±¸ÉÏµÄ²Ù×÷ÏµÍ³ºÍÓ¦ÓÃµÄÌØÕ÷ÐÅÏ¢£»¸ù¾ÝÃ¿¸öËùÊö´ý·À¿ØÄ¿±êÉè±¸ÉÏµÄ²Ù×÷ÏµÍ³ºÍÓ¦ÓÃµÄÌØÕ÷ÐÅÏ¢£¬È·¶¨Ã¿¸öËùÊö´ý·À¿ØÄ¿±êÉè±¸¶ÔÓ¦µÄ°²È«²ßÂÔºÍ°×Ãûµ¥£»ÏòÃ¿¸öËùÊö´ý·À¿ØÄ¿±êÉè±¸·¢ËÍ¶ÔÓ¦µÄ°²È«²ßÂÔºÍ°×Ãûµ¥£¬ÒÔÊ¹Ã¿¸öËùÊö´ý·À¿ØÄ¿±êÉè±¸¸ù¾Ý½ÓÊÕµ½µÄ°²È«²ßÂÔºÍ°×Ãûµ¥ÔËÐÐ¡£±…	°²È«
²ÆÎñ¼à²â¹ÜÀíÏµÍ³	Ì«²Öºè²ßÍØ´ï¿Æ¼¼×ÉÑ¯ÓÐÏÞ¹«Ë¾	2017-04-17	2017-09-29	CN107220743A	Ö÷·ÖÀàºÅ£ºG06Q10/06(2012.01)I	ÔÚÉó-ÊµÖÊÉó²éµÄÉúÐ§	215400 ½­ËÕÊ¡ËÕÖÝÊÐÌ«²ÖÊÐ¿Æ½ÌÐÂ³Ç½¡ÐÛÂ·20ºÅ	±¾·¢Ã÷¹«¿ªÁËÒ»ÖÖ²ÆÎñ¼à²â¹ÜÀíÏµÍ³£¬Æä°üÀ¨·þÎñÖÕ¶ËÄ£¿é¡¢¿Í»§¶ËÄ£¿é¡¢¹ÜÀíÄ£¿éºÍ¼à¿ØÄ£¿é£¬¿Í»§¶ËÄ£¿é¡¢¹ÜÀíÄ£¿éºÍ¼à¿ØÄ£¿é¶¼Óë·þÎñÖÕ¶ËÄ£¿éÁ¬½Ó£¬·þÎñÖÕ¶ËÄ£¿éÓëÖ÷¿ØÆ½Ì¨Ä£¿éÁ¬½Ó£¬¿Í»§¶ËÄ£¿é°üÀ¨ÓÃ»§µ¼Èë´°¿Ú¡¢ÓÃ»§ÐÅÏ¢¼à²âºÍµÇÂ¼ËùÔÚµØ¼ì²â£¬µ¼Èë´°¿Ú¡¢ÓÃ»§ÐÅÏ¢¼à²âºÍµÇÂ¼ËùÔÚµØ¼ì²â¶¼°²×°ÔÚ¿Í»§¶ËÄ£¿éÄÚ£¬¹ÜÀíÄ£¿é°üÀ¨ÐÅÏ¢µ¼Èë¡¢ÐÅÏ¢ÕûÀíºÍÉ¸Ñ¡´íÎó£¬ÐÅÏ¢µ¼Èë¡¢ÐÅÏ¢ÕûÀíºÍÉ¸Ñ¡´íÎó¶¼°²×°ÔÚ¹ÜÀíÄ£¿éÄÚ£¬¼à¿ØÄ£¿é°üÀ¨¿Í»§¶Ë¼ì²…	°²È«
Ò»ÖÖÉí·ÝÈÏÖ¤Ä£Ê½È·¶¨·½·¨ºÍ×°ÖÃ	ÓîÁú¼ÆËã»úÍ¨ÐÅ¿Æ¼¼£¨ÉîÛÚ£©ÓÐÏÞ¹«Ë¾	2017-04-18	2017-09-05	CN107133506A	Ö÷·ÖÀàºÅ£ºG06F21/32(2013.01)I	ÔÚÉó-ÊµÖÊÉó²éµÄÉúÐ§	518057 ¹ã¶«Ê¡ÉîÛÚÊÐÄÏÉ½Çø¿Æ¼¼Ô°±±ÇøÃÎÏªµÀ2ºÅ	±¾·¢Ã÷¹«¿ªÁËÒ»ÖÖÉí·ÝÈÏÖ¤Ä£Ê½È·¶¨·½·¨ºÍ×°ÖÃ£¬ËùÊö·½·¨°üÀ¨£º»ñÈ¡ÓÃ»§µÄµ±Ç°ÉúÎïÐÅÏ¢£»¸ù¾ÝËùÊöµ±Ç°ÉúÎïÐÅÏ¢ÅÐ¶ÏÓÃ»§µ±Ç°ÊÇ·ñ´¦ÓÚÎÞ×ÔÖ÷ÒâÊ¶×´Ì¬£»µ±ÓÃ»§µ±Ç°´¦ÓÚÎÞ×ÔÖ÷ÒâÊ¶×´Ì¬Ê±£¬±ä¸ü»ò¹Ø±Õµ±Ç°Éí·ÝÈÏÖ¤Ä£Ê½¡£¸Ã·½°¸Í¨¹ýÊµÊ±»ñÈ¡ÓÃ»§µÄµ±Ç°ÉúÎïÐÅÏ¢£¬È»ºó¸ù¾Ý¸Ãµ±Ç°ÉúÎïÐÅÏ¢È·¶¨ÓÃ»§µ±Ç°ÊÇ·ñ¾ßÓÐ×ÔÖ÷ÒâÊ¶£¬Èç¹ûÓÃ»§µ±Ç°´¦ÓÚÎÞ×ÔÖ÷ÒâÊ¶×´Ì¬£¬ÎªÁË±£Ö¤ÓÃ»§ÖÕ¶ËÖÐµÄÒþË½°²È«£¬¶ÔÖÕ¶ËµÄµ±Ç°Éí·ÝÈÏÖ¤Ä£Ê½½øÐÐ±ä¸ü»ò¹Ø±Õ£¬ÒÔÔöÇ¿Éí·…	°²È«
ÈÏÖ¤×°ÖÃ¼°ÈÏÖ¤·½·¨	ÉÏº£ÆÖ½­ÖÇÄÜ¿¨ÏµÍ³ÓÐÏÞ¹«Ë¾	2017-04-19	2017-07-07	CN106934273A	Ö÷·ÖÀàºÅ£ºG06F21/45(2013.01)I	ÔÚÉó-ÊµÖÊÉó²éµÄÉúÐ§	201809 ÉÏº£ÊÐ¼Î¶¨Çø»¦Ì«Â·7488Åª100ºÅ	±¾·¢Ã÷Ìá¹©Ò»ÖÖÈÏÖ¤×°ÖÃ¼°ÈÏÖ¤·½·¨£¬ËùÊöÈÏÖ¤×°ÖÃ°üÀ¨£º½ÓÊÕÄ£¿é£¬ÊÊÓÚ½ÓÊÕÖ§¸¶½»Ò×ÏµÍ³·¢ËÍµÄÈÏÖ¤ÇëÇóÐÅÏ¢£»²É¼¯Ä£¿é£¬ÓëËùÊö½ÓÊÕÄ£¿éÏàÁ¬½Ó£¬ÊÊÓÚÔÚ½ÓÊÕµ½ÈÏÖ¤ÇëÇóÐÅÏ¢Ê±²É¼¯ÈÏÖ¤¶¯×÷ÐÅÏ¢£»±È¶ÔÄ£¿é£¬ÓëËùÊö²É¼¯Ä£¿éÏàÁ¬½Ó£¬ÊÊÓÚ½«ËùÊö²É¼¯Ä£¿é²É¼¯µ½µÄÈÏÖ¤¶¯×÷ÐÅÏ¢ÓëÄ¿±êÈÏÖ¤¶¯×÷ÐÅÏ¢½øÐÐ±È¶Ô£»È·ÈÏÄ£¿é£¬ÓëËùÊö±È¶ÔÄ£¿éÏàÁ¬½Ó£¬ÊÊÓÚÔÚËùÊö±È¶ÔÄ£¿éÖÐ²É¼¯µ½µÄÈÏÖ¤¶¯×÷ÐÅÏ¢ÓëËùÊöÄ¿±êÈÏÖ¤¶¯×÷ÐÅÏ¢±È¶Ô³É¹¦Ê±È·ÈÏÍ¨¹ýÈÏÖ¤¡£±¾·¢Ã…	°²È«
ÊµÏÖÒÆ¶¯»¥ÁªÍø°²È«Ö§¸¶µÄ´æ´¢½éÖÊºÍÒÆ¶¯ÖÕ¶Ë	ÄÏÑÞ×Ó	2017-04-21	2017-09-26	CN107203884A	Ö÷·ÖÀàºÅ£ºG06Q20/40(2012.01)I	ÔÚÉó-ÊµÖÊÉó²éµÄÉúÐ§	713300 ÉÂÎ÷Ê¡ÏÌÑôÊÐÇ¬ÏØÁÙÆ½ÕòÈ«ÐÂ´åÑîÖÐ×é	±¾¹«¿ªÉæ¼°»¥ÁªÍøÒÆ¶¯Ö§¸¶ÁìÓò£¬¾ßÌåÊÇ¹ØÓÚÒ»ÖÖÊµÏÖÒÆ¶¯»¥ÁªÍø°²È«Ö§¸¶µÄ´æ´¢½éÖÊºÍÒÆ¶¯ÖÕ¶Ë¡£¸Ã´æ´¢½éÖÊÉÏ´æ´¢ÓÐ¼ÆËã»ú³ÌÐò£¬¸Ã³ÌÐò±»´¦ÀíÆ÷Ö´ÐÐÊ±ÊµÏÖÒÆ¶¯»¥ÁªÍø°²È«Ö§¸¶·½·¨£¬¸Ã·½·¨°üÀ¨£º¼à²âÒÆ¶¯ÖÕ¶ËµÄÏÔÊ¾ÆÁÄ»ÉÏÒ»Ö§¸¶Ó¦ÓÃ³ÌÐò¶ÔÓ¦µÄÓ¦ÓÃÍ¼±êÊÇ·ñ±»µã»÷£»ÔÚËùÊöÓ¦ÓÃÍ¼±ê±»µã»÷Ê±£¬»ñÈ¡ËùÊöÏÔÊ¾ÆÁÄ»ÉÏ±»µã»÷µÄµÚÒ»µã»÷µãµÄÃæ»ý£»ÅÐ¶ÏËùÊöµÚÒ»µã»÷µãµÄÃæ»ýÊÇ·ñµÈÓÚÔ¤ÉèÃæ»ýÖµ£¬Èô·ñÔò²»Æô¶¯ËùÊöÖ§¸¶Ó¦ÓÃ³ÌÐò¡£±¾¹«¿ª¿ÉÒÔ´ó´óÌ…	Ö§¸¶
Ò»ÖÖÒÆ¶¯»¥ÁªÍø°²È«Ö§¸¶×°ÖÃ	ÄÏÑÞ×Ó	2017-04-21	2017-08-04	CN107016547A	Ö÷·ÖÀàºÅ£ºG06Q20/40(2012.01)I	ÔÚÉó-ÊµÖÊÉó²éµÄÉúÐ§	713300 ÉÂÎ÷Ê¡ÏÌÑôÊÐÇ¬ÏØÁÙÆ½ÕòÈ«ÐÂ´åÑîÖÐ×é	±¾¹«¿ªÉæ¼°»¥ÁªÍøÒÆ¶¯Ö§¸¶ÁìÓò£¬¾ßÌåÊÇ¹ØÓÚÒ»ÖÖÒÆ¶¯»¥ÁªÍø°²È«Ö§¸¶×°ÖÃ£¬¸Ã×°ÖÃ°üÀ¨£ºµã»÷¼à²âÄ£¿é£¬ÓÃÓÚ¼à²âÒÆ¶¯ÖÕ¶ËµÄÏÔÊ¾ÆÁÄ»ÉÏÒ»Ö§¸¶Ó¦ÓÃ³ÌÐò¶ÔÓ¦µÄÓ¦ÓÃÍ¼±êÊÇ·ñ±»µã»÷£»Ãæ»ý»ñÈ¡Ä£¿é£¬ÓÃÓÚÔÚËùÊöÓ¦ÓÃÍ¼±ê±»µã»÷Ê±£¬»ñÈ¡ËùÊöÏÔÊ¾ÆÁÄ»ÉÏ±»µã»÷µÄµÚÒ»µã»÷µãµÄÃæ»ý£»Ó¦ÓÃ¿ª±ÕÄ£¿é£¬ÓÃÓÚÅÐ¶ÏËùÊöµÚÒ»µã»÷µãµÄÃæ»ýÊÇ·ñµÈÓÚÔ¤ÉèÃæ»ýÖµ£¬Èô·ñÔò²»Æô¶¯ËùÊöÖ§¸¶Ó¦ÓÃ³ÌÐò¡£±¾¹«¿ª¿ÉÒÔ´ó´óÌá¸ßÒÆ¶¯Ö§¸¶²Ù×÷µÄ°²È«ÐÔ£¬±ÜÃâÓÃ»§²Æ²úËðÊ§¡£	Ö§¸¶
Ò»ÖÖÒøÐÐ¶àÏµÍ³¼äÓÃ»§ÊÖ»úºÅÂëµÄÍ¬²½¿ØÖÆ·½·¨¼°ÏµÍ³	ÖÐ¹úÒøÐÐ¹É·ÝÓÐÏÞ¹«Ë¾	2017-04-24	2017-09-01	CN107122446A	Ö÷·ÖÀàºÅ£ºG06F17/30(2006.01)I	ÔÚÉó-ÊµÖÊÉó²éµÄÉúÐ§	100818 ±±¾©ÊÐÎ÷³ÇÇø¸´ÐËÃÅÄÚ´ó½Ö1ºÅ	±¾·¢Ã÷Ìá¹©ÁËÒ»ÖÖÒøÐÐ¶àÏµÍ³¼äÓÃ»§ÊÖ»úºÅÂëµÄÍ¬²½¿ØÖÆ·½·¨¼°ÏµÍ³£¬Éæ¼°ÒøÐÐÏµÍ³Êý¾ÝÎ¬»¤¼¼ÊõÁìÓò¡£·½·¨°üÀ¨£ºÒøÐÐºËÐÄÏµÍ³½ÓÊÕÓÃ»§ÊÖ»úºÅÂëÎ¬»¤½»Ò×ÇëÇó£»ËùÊöÓÃ»§ÊÖ»úºÅÂëÎ¬»¤½»Ò×ÇëÇó°üÀ¨ÓÃ»§È¨ÏÞÈÏÖ¤ÐÅÏ¢ºÍ´ý¸üÐÂÊÖ»úºÅÂë£»ÒøÐÐºËÐÄÏµÍ³¸ù¾ÝËùÊöÓÃ»§È¨ÏÞÈÏÖ¤ÐÅÏ¢¶ÔÓÃ»§È¨ÏÞ½øÐÐÈÏÖ¤£»ÒøÐÐºËÐÄÏµÍ³ÔÚ¶ÔÓÃ»§È¨ÏÞ½øÐÐÈÏÖ¤Í¨¹ýºó£¬½«ÒøÐÐºËÐÄÏµÍ³±¾µØÊý¾Ý¿âÖÐµÄÓÃ»§ÊÖ»úºÅÂë¸ü¸ÄÎªËùÊö´ý¸üÐÂÊÖ»úºÅÂë£¬²¢½«ÒøÐÐºËÐÄÏµÍ³±¾µØÊý¾Ý¿âÖ…	Êý¾Ý·ÖÎö
Î¨Ò»ÐÔµÄ¸öÈËÉí·Ý°²È«Ê¶±ðÈ·ÈÏºÍÊµÊ±Ã½½éÃÜ³×·½·¨	¸¶¶°ÌÎ	2017-04-27	2018-11-13	CN108804890A	Ö÷·ÖÀàºÅ£ºG06F21/32(2013.01)I	ÔÚÉó-¹«¿ª	102600 ±±¾©ÊÐ´óÐËÇøÂí·»Â·6ºÅ	±¾·¢Ã÷¹«¿ªÁËÒ»ÖÖ½«¸öÈËµÄÉí·Ý°²È«Ê¶±ðÈ·ÈÏºÍÃ½½éÐÔÃÜ³×Á´½ÓÈÕ³£¸÷ÖÖ·þÎñÏµÍ³(ÃñÕþ£¬ÒøÐÐ£¬±£ÏÕ£¬Ò½ÁÆ£¬¹ºÎïµÈ)µÄ·½·¨£¬ÀûÓÃÁË»¥ÁªÍøÂç£¬IPv6µØÖ·µÈ¼¼Êõ×÷Îª»ù´¡£¬´Ó¶ø¸ø³ö´Ó¶ø×öµ½ÄÜ¸üºÃµÄ±£ÕÏ¸öÈËÐÅÏ¢¼°²Æ²úµÄ°²È«µÄ·½·¨¡£	°²È«
ÉúÃüÌåÕ÷ÐÅÏ¢µÄÈ·¶¨·½·¨¡¢Éí·ÝÈÏÖ¤·½·¨ºÍ×°ÖÃ	ÉîÛÚÊÐ»ã¶¥¿Æ¼¼¹É·ÝÓÐÏÞ¹«Ë¾	2017-05-03	2017-09-29	CN107223251A	Ö÷·ÖÀàºÅ£ºG06F21/32(2013.01)I	ÔÚÉó-ÊµÖÊÉó²éµÄÉúÐ§	518045 ¹ã¶«Ê¡ÉîÛÚÊÐ¸£Ìï±£Ë°ÇøÌÚ·É¹¤Òµ´óÏÃB×ù13²ã	±¾ÉêÇëÊµÊ©ÀýÌá¹©Ò»ÖÖÉúÃüÌåÕ÷ÐÅÏ¢µÄÈ·¶¨·½·¨¡¢Éí·ÝÈÏÖ¤·½·¨ºÍ×°ÖÃ£¬ÌåÕ÷ÐÅÏ¢µÄÈ·¶¨·½·¨°üÀ¨£º»ñÈ¡´ý²âÌå´¥Ñ¹ÔÚÉúÎïÌØÕ÷´«¸ÐÆ÷ÉÏÊ±²É¼¯µ½µÄµÚÒ»ÉúÎïÌØÕ÷Êý¾Ý£¬µÚÒ»ÉúÎïÌØÕ÷Êý¾ÝÓÃÓÚ·´Ó¦´ý²âÌåµÄÌå±íÎÆÀíÌØÕ÷£»¶Ô´ý²âÌåµÄ¶à¸öµÚÒ»ÉúÎïÌØÕ÷Êý¾Ý½øÐÐ½âÎöÒÔ»ñÈ¡µÚ¶þÉúÎïÌØÕ÷Êý¾Ý£¬µÚ¶þÉúÎïÌØÕ÷Êý¾ÝÓÃÓÚ·´Ó¦´ý²âÌåËùÊôÖ÷ÌåÉúÃüÌåÕ÷£»¸ù¾ÝµÚ¶þÉúÎïÌØÕ÷Êý¾ÝÈ·¶¨´ý²âÌåËùÊôÖ÷ÌåµÄÉúÃüÌåÕ÷ÐÅÏ¢£¬ÔÚ²»¸Ä±äÏÖÓÐµÄÉúÎïÌØÕ÷´«¸ÐÆ÷½á¹¹ÇÒ²»Ôö¼Ó¶…	°²È«
Ò»ÖÖÊý¾Ý±£È«·½·¨¼°Ïà¹ØÏµÍ³	¹úÐÅ¼ÎÄþÊý¾Ý¼¼ÊõÓÐÏÞ¹«Ë¾	2017-05-05	2017-09-15	CN107169364A	Ö÷·ÖÀàºÅ£ºG06F21/60(2013.01)I	ÔÚÉó-ÊµÖÊÉó²éµÄÉúÐ§	100025 ±±¾©ÊÐ³¯ÑôÇø¶«ËÄ»·ÖÐÂ·56ºÅÔ¶Ñó¹ú¼ÊÖÐÐÄA×ù2306ÊÒ	±¾·¢Ã÷¹«¿ªÁËÒ»ÖÖÊý¾Ý±£È«·½·¨¼°Ïà¹ØÏµÍ³¡£ËùÊö·½·¨°üÀ¨£º½ÓÊÕ½ðÈÚÒµÎñ·þÎñÆ÷·¢ËÍµÄÊý¾Ý±£È«ÇëÇó£»½âÎö³öËùÊöÊý¾Ý±£È«ÇëÇóÖÐ°üº¬µÄ¿Í»§¶ËºÍ/»ò½ðÈÚÒµÎñ·þÎñÆ÷ÔÚÖ´ÐÐÒµÎñÁ÷³ÌÖÐ²É¼¯µÄÔ¤ÉèµÄ±£È«µãµÄÊý¾Ý£»¶Ô½âÎö³öÀ´µÄ±£È«µãµÄÊý¾Ý½øÐÐÇ©ÃûºÍ¼ÓÃÜ£»½«¾­¹ýÇ©ÃûºÍ¼ÓÃÜµÄÊý¾Ý´æÈëÊý¾Ý¿âÖÐ½øÐÐ¹Ì»¯¡£±¾·¢Ã÷ÔÚµÚÒ»Ê±¼ä½«½»Ò×µÄÊý¾Ý½øÐÐÖ¤¾ÝµÄ²É¼¯²¢¹Ì»¯£¬²¢ÐÎ³ÉÖ¤¾ÝÁ´Ìõ£¬ÎªºóÆÚ¿Í»§»òÕß´û¿îÆ½Ì¨·¢Éú·¨ÂÉ¾À·×Ê±£¬Ìá¹©Ç¿ÓÐÁ¦µÄÖ¤¾ÝÁ´Ìõ£¬…	½è´û
×Ô¶¯»¹¿îÒµÎñµÄÊý¾Ý±£È«·½·¨¡¢·þÎñÆ÷ºÍÏµÍ³	¹úÐÅ¼ÎÄþÊý¾Ý¼¼ÊõÓÐÏÞ¹«Ë¾	2017-05-05	2017-09-08	CN107146153A	Ö÷·ÖÀàºÅ£ºG06Q40/02(2012.01)I	ÔÚÉó-ÊµÖÊÉó²éµÄÉúÐ§	100025 ±±¾©ÊÐ³¯ÑôÇø¶«ËÄ»·ÖÐÂ·56ºÅÔ¶Ñó¹ú¼ÊÖÐÐÄA×ù2306ÊÒ	±¾·¢Ã÷¹«¿ªÁËÒ»ÖÖ×Ô¶¯»¹¿îÒµÎñµÄÊý¾Ý±£È«·½·¨¡¢·þÎñÆ÷¡¢¿Í»§¶ËºÍÏµÍ³¡£ËùÊö·½·¨°üÀ¨£º¸ù¾ÝÉóÅúÍ¨¹ýµÄµ±ÌìÐèÒª×Ô¶¯»¹¿îµÄ´û¿î½è¾Ý£¬Éú³É¶ÔÓ¦µÄ×Ô¶¯¿Û¿îÅú´¦ÀíÎÄ¼þ£»Ö´ÐÐËùÊöÅú´¦ÀíÎÄ¼þ£¬²¢²É¼¯Ëù²úÉúµÄ×Ô¶¯»¹¿î±¨ÎÄ£»½«Ëù²É¼¯µÄ×Ô¶¯»¹¿î±¨ÎÄ·¢ËÍ¸øÊý¾Ý±£È«ÖÐÐÄ£¬ÒÔ±ãËùÊöÊý¾Ý±£È«ÖÐÐÄ¶ÔËùÊöÊý¾Ý½øÐÐ´æ´¢¡£ÔÚµÚÒ»Ê±¼ä½«½»Ò×µÄÊý¾Ý½øÐÐÖ¤¾ÝµÄ²É¼¯²¢¹Ì»¯£¬ÎªºóÆÚ¿Í»§»òÕß´û¿îÆ½Ì¨·¢Éú·¨ÂÉ¾À·×Ê±£¬Ìá¹©Ç¿ÓÐÁ¦µÄÖ¤¾ÝÁ´Ìõ£¬½ø¶ø±£»¤´û¿î¹…	½è´û
ÏÖ½ðÉêÇëÒµÎñµÄÊý¾Ý±£È«·½·¨¡¢·þÎñÆ÷¼°¿Í»§¶ËºÍÏµÍ³	¹úÐÅ¼ÎÄþÊý¾Ý¼¼ÊõÓÐÏÞ¹«Ë¾	2017-05-05	2017-07-28	CN106991338A	Ö÷·ÖÀàºÅ£ºG06F21/62(2013.01)I	ÔÚÉó-ÊµÖÊÉó²éµÄÉúÐ§	100025 ±±¾©ÊÐ³¯ÑôÇø¶«ËÄ»·ÖÐÂ·56ºÅÔ¶Ñó¹ú¼ÊÖÐÐÄA×ù2306ÊÒ	±¾·¢Ã÷¹«¿ªÁËÒ»ÖÖÏÖ½ðÉêÇëÒµÎñµÄÊý¾Ý±£È«·½·¨¡¢·þÎñÆ÷¼°¿Í»§¶ËºÍÏµÍ³¡£ËùÊö·½·¨°üÀ¨£º½ÓÊÕ¿Í»§¶Ë·¢ËÍµÄÏÖ½ðÉêÇëÒµÎñÇëÇóÒÔ¼°ËùÊö¿Í»§¶ËÔÚÏÖ½ðÉêÇëÁ÷³ÌÖÐ²É¼¯µÄ±£È«µãµÄÊý¾Ý£»¶Ô¿Í»§¶ËµÄÏÖ½ðÉêÇëÒµÎñÇëÇó½øÐÐÉóºË£¬µ±Í¨¹ýÊ±£¬ÏòÓÃ»§ÍÆËÍÏÖ½ðÉêÇëÒµÎñÉóºË½á¹û£»Ö´ÐÐ·Å¿îÁ÷³Ì£¬²¢²É¼¯·Å¿îÁ÷³ÌÖÐ±£È«µãµÄÊý¾Ý£»½«ËùÊö¿Í»§¶ËÔÚÏÖ½ðÉêÇëÁ÷³ÌÖÐ²É¼¯µÄ±£È«µãµÄÊý¾Ý¡¢ËùÊöÒµÎñÉóºË½á¹ûºÍËùÊö·Å¿îÁ÷³ÌÖÐ²É¼¯µÄ±£È«µãµÄÊý¾Ý·¢ËÍ¸øÊý¾Ý±£È«ÖÐÐ…	½è´û
Ò»ÖÖ½ðÈÚÒµÎñÊý¾Ý±£È«·½·¨¡¢·þÎñÆ÷¡¢¿Í»§¶ËºÍÏµÍ³	¹úÐÅ¼ÎÄþÊý¾Ý¼¼ÊõÓÐÏÞ¹«Ë¾	2017-05-05	2017-07-28	CN106991339A	Ö÷·ÖÀàºÅ£ºG06F21/62(2013.01)I	ÔÚÉó-ÊµÖÊÉó²éµÄÉúÐ§	100025 ±±¾©ÊÐ³¯ÑôÇø¶«ËÄ»·ÖÐÂ·56ºÅÔ¶Ñó¹ú¼ÊÖÐÐÄA×ù2306ÊÒ	±¾·¢Ã÷¹«¿ªÁËÒ»ÖÖ½ðÈÚÒµÎñÊý¾Ý±£È«·½·¨¡¢·þÎñÆ÷ºÍ¿Í»§¶ËºÍÏµÍ³¡£ÆäÖÐ·½·¨°üÀ¨£º½ÓÊÕ¿Í»§¶Ë·¢ËÍµÄÊÚÐÅÒµÎñÇëÇóÒÔ¼°ËùÊö¿Í»§¶ËÔÚÊÚÐÅÒµÎñÁ÷³ÌÖÐ²É¼¯µÄ¸÷¿Í»§¶Ë±£È«µãµÄÊý¾Ý£»¶Ô¿Í»§¶ËµÄÊÚÐÅÒµÎñÇëÇó½øÐÐÉóºË£»ÔÚÉóºËÍ¨¹ýÊ±Ïò¿Í»§¶Ë·µ»ØÊÚÐÅ½á¹û£¬²¢½«±¾µØÔÚÊÚÐÅÒµÎñÁ÷³ÌÖÐ²É¼¯µÄ¸÷·þÎñÆ÷±£È«µã¶ÔÓ¦µÄÊý¾ÝºÍËùÊö¸÷¿Í»§¶Ë±£È«µã¶ÔÓ¦µÄÊý¾Ý·¢ËÍ¸øÊý¾Ý±£È«ÖÐÐÄ£¬ÒÔ±ãËùÊöÊý¾Ý±£È«ÖÐÐÄ¶ÔËùÊöÊý¾Ý½øÐÐ´æ´¢¡£¶Ô»¥ÁªÍø´û¿îÒµÎñÖÐ²úÉúµÄ¸÷½Úµ…	½è´û
Ò»ÖÖÊý¾Ý±£È«·½·¨¼°Ïà¹ØÏµÍ³	¹úÐÅ¼ÎÄþÊý¾Ý¼¼ÊõÓÐÏÞ¹«Ë¾	2017-05-05	2017-08-18	CN107070942A	Ö÷·ÖÀàºÅ£ºH04L29/06(2006.01)I	ÔÚÉó-ÊµÖÊÉó²éµÄÉúÐ§	100025 ±±¾©ÊÐ³¯ÑôÇø¶«ËÄ»·ÖÐÂ·56ºÅÔ¶Ñó¹ú¼ÊÖÐÐÄA×ù2306ÊÒ	±¾·¢Ã÷¹«¿ªÁËÒ»ÖÖÊý¾Ý±£È«·½·¨¼°Ïà¹ØÏµÍ³¡£ËùÊö·½·¨°üÀ¨£º½ÓÊÕ½ðÈÚÒµÎñ·þÎñÆ÷·¢ËÍµÄÊý¾Ý±£È«ÇëÇó£»½âÎö³öËùÊöÊý¾Ý±£È«ÇëÇóÖÐ°üº¬µÄ½ðÈÚÒµÎñ¿Í»§¶ËºÍ/»ò½ðÈÚÒµÎñ·þÎñÆ÷ÔÚÖ´ÐÐÒµÎñÁ÷³ÌÖÐ²É¼¯µÄÔ¤ÉèµÄ±£È«µãµÄÊý¾Ý£»¶Ô½âÎö³öÀ´µÄ±£È«µãµÄÊý¾Ý½øÐÐÇ©ÃûºÍ¼ÓÃÜ£»Ç©ÃûºÍ¼ÓÃÜµÄÊý¾Ý´æÈëÊý¾Ý¿âÖÐ½øÐÐ¹Ì»¯£»½«ËùÊöÊý¾Ý¿âÖÐ¹Ì»¯µÄÊý¾Ý±¸·ÝÖÁÔ¤ÉèµÄ±£È«±¸·ÝÏµÍ³²¢Í¬²½ÖÁÔ¤ÉèµÄÊý¾Ý±£È«»ú¹¹¡£±¾·¢Ã÷ÔÚµÚÒ»Ê±¼ä½«½»Ò×µÄÊý¾Ý½øÐÐÖ¤¾ÝµÄ²É¼¯²¢¹Ì»¯…	½è´û
»ùÓÚÆ´ÒôµÄÑéÖ¤ÂëÉú³É·½·¨¼°×°ÖÃ	¹ãÖÝ°®¾ÅÓÎÐÅÏ¢¼¼ÊõÓÐÏÞ¹«Ë¾	2017-05-10	2018-11-23	CN108875349A	Ö÷·ÖÀàºÅ£ºG06F21/36(2013.01)I	ÓÐÐ§-ÊµÖÊÉó²éµÄÉúÐ§	510000 ¹ã¶«Ê¡¹ãÖÝÊÐÌìºÓÇø»ÆÆÒ´óµÀÎ÷Æ½ÔÆÂ·163ºÅ¹ãµçÆ½ÔÆ¹ã³¡BËþ13²ã×Ô±à02µ¥Ôª	±¾·¢Ã÷Ìá¹©Ò»ÖÖ»ùÓÚÆ´ÒôµÄÑéÖ¤ÂëÉú³É·½·¨¼°×°ÖÃ£¬°üÀ¨£º´Óºº×Ö¿âÖÐÑ¡È¡M¸ö²»Í¬µÄÑéÖ¤ºº×Ö£¬ËùÊöÑéÖ¤ºº×Ö°üÀ¨Ò»¸öÌáÊ¾ºº×ÖºÍÖÁÉÙÁ½¸ö´ýÑ¡ºº×Ö£¬ËùÊö´ýÑ¡ºº×ÖÖÐ´æÔÚÖÁÉÙÒ»¸ö±ê×¼ºº×Ö£¬ËùÊö±ê×¼ºº×ÖµÄÆ´ÒôÊ××ÖÄ¸ÓëËùÊöÌáÊ¾ºº×ÖµÄÆ´ÒôÊ××ÖÄ¸ÏàÍ¬£¬MÎª²»Ð¡ÓÚ3µÄÕýÕûÊý£»¸ù¾ÝËùÊöÌáÊ¾ºº×ÖºÍËùÊö´ýÑ¡ºº×Ö£¬Éú³É²¢ÏòÓÃ»§ÍÆËÍÑéÖ¤Âë£¬ÒÔÊ¹ËùÊöÓÃ»§¸ù¾ÝËùÊöÑéÖ¤Âë£¬Í¨¹ý´ÓËùÊö´ýÑ¡ºº×ÖÖÐÑ¡ÔñÆäÆ´ÒôÊ××ÖÄ¸ÓëËùÊöÌáÊ¾ºº×ÖµÄÆ´ÒôÊ××ÖÄ¸ÏàÍ¬µÄºº…	°²È«
»ùÓÚÖÇÄÜÊÖ»úµÄÒøÐÐÊý¾Ý²É¼¯ºÍÈÏÖ¤·½·¨¼°ÏµÍ³	½ð°î´ïÓÐÏÞ¹«Ë¾	2017-05-10	2017-07-11	CN106941503A	Ö÷·ÖÀàºÅ£ºH04L29/06(2006.01)I	ÔÚÉó-ÊµÖÊÉó²éµÄÉúÐ§	519000 ¹ã¶«Ê¡Öéº£ÊÐÇ°É½¸£Ïª½ð°î´ï´óÏÃ	±¾·¢Ã÷Éæ¼°»ùÓÚÖÇÄÜÊÖ»úµÄÒøÐÐÊý¾Ý²É¼¯ºÍÈÏÖ¤·½·¨¼°ÏµÍ³£¬¸Ã·½·¨°üÀ¨£º»ù±¾×¢²á²½Öè¡¢Éí·ÝÖ¤Ê¶±ð²½Öè¡¢Éí·ÝÖ¤±È¶Ô²½Öè¡¢Ö¸ÎÆÊ¶±ð²½Öè¡¢Ö¸ÎÆ±È¶Ô²½Öè¡¢Í·Ïñ²É¼¯²½ÖèºÍÍ·Ïñ¶Ô±È²½Öè¡£¸ÃÏµÍ³ÓÃÓÚÊµÏÖÉÏÊö·½·¨£¬°üÀ¨»ù±¾×¢²áµ¥Ôª¡¢Éí·ÝÖ¤Ê¶±ðµ¥Ôª¡¢Éí·ÝÖ¤±È¶Ôµ¥Ôª¡¢Ö¸ÎÆÊ¶±ðµ¥Ôª¡¢Ö¸ÎÆ±È¶Ôµ¥Ôª¡¢Í·Ïñ²É¼¯µ¥ÔªºÍÍ·Ïñ±È¶Ôµ¥Ôª¡£±¾·¢Ã÷µÄ·½·¨ºÍÏµÍ³ÄÜ¹»°²È«¡¢Ô¶³Ì¡¢±ã½ÝµØ½øÐÐÊý¾Ý²É¼¯ÓëÈÏÖ¤£¬ÓÈÆäÊÊÓÃÓÚÔ¶³ÌÉêÇëÒøÐÐÕË»§¡£	°²È«
ÒÔÉí·ÝÖ¤ºÅÎª°²È«ºÅ£¨×¢²áºÅ£©µÄÎÞ¿¨ÖÇÄÜÊÖ»ú	Â¬Õñ»ª	2017-05-12	2017-07-25	CN106982301A	Ö÷·ÖÀàºÅ£ºH04M1/725(2006.01)I	ÔÚÉó-ÊµÖÊÉó²éµÄÉúÐ§	523000 ¹ã¶«Ê¡¶«Ý¸ÊÐÖÐÌÃÕòäêÓ¿ÖÐÌÃ¹ú¼ÊÆûÅä³ÇD2¶°	ÒÔÉí·ÝÖ¤ºÅÎª°²È«ºÅ(×¢²áºÅ)µÄÎÞ¿¨ÖÇÄÜÊÖ»úÏÖÔÚÊÖ»ú¶¼ÊÇ´øIC¿¨µÄÊÖ»ú£¬´ø¿¨µÄÊÖ»ú¸ü»»ºÜ²»·½±ã£¬¸ü»»¿¨ÓÖÕ¼ÓÃÁËºÜ¶àÊ±¼ä£¬ÊÖ»úÖÆÔìÉÌÓÖÒª¶àÖÆÔì¿¨²Û£¬Ôö¼ÓÁËÖÆÔì³É±¾£¬×î´óµÄÈ±µãÊÇÊÖ»ú²»ÄÜÍêÈ«´úÌæÈË½øÐÐ¸÷ÖÖ²Ù×÷¡£±¾·¢Ã÷ÎªÁË½â¾öÉÏÊöÎÊÌâ£¬ÎÒÃÇÌá³öÁËÒÔÉí·ÝÖ¤ºÅÎª°²È«ºÅµÄÎÞ¿¨ÊÖ»úµÄÐÂ¸ÅÄî£¬ÎÞ¿¨ÊÖ»úºÃ´¦ÓÐ£º1.¸ü»»ÊÖ»ú¿ì½Ý¡£2.ÖÆÔì³É±¾µÍ¡£3.Éí·ÝÖ¤ÊÇÎ¨Ò»µÄ°²È«ºÅËùÒÔ°²È«ÐÔºÃ¡£4.¿ÉÒÔÊ¹ÓÃÊÖ»ú´úÌæ¸öÈËÉí·ÝÖ¤¡¢¼ÝÊ»Ö¤µÈÖ¤¼þ¡£5…	°²È«
Ò»ÖÖ´øÓÐ·À´Û¸ÄÏßÂ·µÄ´¥ÃþÆÁ	½ðÁú»úµç£¨º¼ÖÝ£©ÓÐÏÞ¹«Ë¾	2017-05-16	2017-08-01	CN106997442A	Ö÷·ÖÀàºÅ£ºG06F21/87(2013.01)I	ÔÚÉó-ÊµÖÊÉó²éµÄÉúÐ§	310000 Õã½­Ê¡º¼ÖÝÊÐ¾­¼Ã¼¼Êõ¿ª·¢Çø18ºÅ´ó½Ö7ºÅ	±¾·¢Ã÷Ìá¹©ÁËÒ»ÖÖ´øÓÐ·À´Û¸ÄÏßÂ·µÄ´¥ÃþÆÁ£¬ÉèÖÃÓÐ·À´Û¸ÄÏßÂ·£¬¸Ã·À´Û¸ÄÏßÂ·¼¯³ÉÔÚ´¥ÃþÆÁÉÏ£¬·À´Û¸ÄÏßÂ·Á¬½Óµ½¿ØÖÆÐ¾Æ¬ÉÏ¡£±¾·¢Ã÷¿ÉÌá¸ßÉèÖÃ¸Ã´¥ÃþÆÁµÄPOS»ú»òÀàËÆË¢¿¨Éè±¸µÈÖÕ¶ËµÄ°²È«ÐÔ¡£	°²È«
²ÆÎñÔËÐÐ¼à¿Ø¹ÜÀíÏµÍ³	Ì«²Ö°£ÌØ°ÂÊý¾Ý¿Æ¼¼ÓÐÏÞ¹«Ë¾	2017-05-17	2017-09-22	CN107194279A	Ö÷·ÖÀàºÅ£ºG06F21/62(2013.01)I	ÓÐÐ§-ÊµÖÊÉó²éµÄÉúÐ§	215400 ½­ËÕÊ¡ËÕÖÝÊÐÌ«²ÖÊÐ¿ª·¢Çø±±¾©¶«Â·88ºÅ¶«B´±	±¾·¢Ã÷¹«¿ªÁËÒ»ÖÖ²ÆÎñÔËÐÐ¼à¿Ø¹ÜÀíÏµÍ³£¬Æä°üÀ¨·þÎñÖÕ¶ËÄ£¿é¡¢¿Í»§¶ËÄ£¿é¡¢¹ÜÀíÄ£¿éºÍ¼à¿ØÄ£¿é£¬¿Í»§¶ËÄ£¿é¡¢¹ÜÀíÄ£¿éºÍ¼à¿ØÄ£¿é¶¼Óë·þÎñÖÕ¶ËÄ£¿éÁ¬½Ó£¬·þÎñÖÕ¶ËÄ£¿éÓëÖ÷¿ØÆ½Ì¨Ä£¿éÁ¬½Ó£¬¿Í»§¶ËÄ£¿é°üÀ¨ÓÃ»§µ¼Èë´°¿Ú¡¢ÓÃ»§ÐÅÏ¢¼à²âºÍµÇÂ¼ËùÔÚµØ¼ì²â£¬µ¼Èë´°¿Ú¡¢ÓÃ»§ÐÅÏ¢¼à²âºÍµÇÂ¼ËùÔÚµØ¼ì²â¶¼°²×°ÔÚ¿Í»§¶ËÄ£¿éÄÚ£¬¹ÜÀíÄ£¿é°üÀ¨ÐÅÏ¢µ¼Èë¡¢ÐÅÏ¢ÕûÀíºÍÉ¸Ñ¡´íÎó£¬ÐÅÏ¢µ¼Èë¡¢ÐÅÏ¢ÕûÀíºÍÉ¸Ñ¡´íÎó¶¼°²×°ÔÚ¹ÜÀíÄ£¿éÄÚ£¬¼à¿ØÄ£¿é°üÀ¨¿Í»§¶…	°²È«
Ò»ÖÖÉúÎïÌØÕ÷ÈÏÖ¤ÏµÍ³¼°ÉúÎïÌØÕ÷ÈÏÖ¤·½·¨	ÊæÏè	2017-05-24	2017-10-24	CN107292152A	Ö÷·ÖÀàºÅ£ºG06F21/32(2013.01)I	ÔÚÉó-×¨ÀûÉêÇëÈ¨¡¢×¨ÀûÈ¨µÄ×ªÒÆ	430014 ºþ±±Ê¡ÎäººÊÐ½­°¶Çø½ðÇÅ´óµÀ68ºÅ¼ªÏé¹È±ðÊûÇø1502¶°3Â¥	±¾·¢Ã÷¹«¿ªÁËÒ»ÖÖÉúÎïÌØÕ÷ÈÏÖ¤ÏµÍ³£¬Éæ¼°ÉúÎïÌØÕ÷Ê¶±ðºÍÃÜÂë¼¼ÊõÁìÓò£¬°üÀ¨ÉúÎïÌØÕ÷²É¼¯Éè±¸¡¢¿ÚÁîÉú³ÉÉè±¸ºÍÊÚÈ¨ÈÏÖ¤Éè±¸£¬±¾·¢Ã÷ÔÚÓÃ»§ÉêÇë×¢²áÊ±ºÍÓÃ»§ÉêÇëÈÏÖ¤Ê±Ê¹ÓÃÉúÎïÌØÕ÷²É¼¯Éè±¸²É¼¯ÉúÎïÌØÕ÷Êý¾Ý²¢½«ÉúÎïÌØÕ÷Êý¾ÝÊäÈë¿ÚÁîÉú³ÉÉè±¸·Ö±ðÉú³É×¢²á°²È«¿ÚÁîºÍÈÏÖ¤°²È«¿ÚÁî£»Ê¹ÓÃÊÚÈ¨ÈÏÖ¤Éè±¸±È¶Ô¸ÃÓÃ»§ID¶ÔÓ¦µÄ×¢²á°²È«¿ÚÁîºÍÈÏÖ¤°²È«¿ÚÁîÊÇ·ñÒ»ÖÂÀ´½øÐÐÊÚÈ¨ÈÏÖ¤¡£²ÉÓÃ±¾·¢Ã÷ÎÞÐè´æ´¢¸öÈËÉúÎïÌØÕ÷ÐÅÏ¢£¬Ö»Ðè´æ´¢¿ÚÁîÉú³É×°ÖÃÀ…	°²È«
Ò»ÖÖÊý¾Ý±£»¤·½·¨¡¢ÒÆ¶¯ÖÕ¶Ë¼°´æ´¢½éÖÊ	±±¾©ÖéÄÂÀÊÂêÒÆ¶¯Í¨ÐÅÓÐÏÞ¹«Ë¾	2017-05-26	2017-10-24	CN107292194A	Ö÷·ÖÀàºÅ£ºG06F21/62(2013.01)I	ÔÚÉó-ÊµÖÊÉó²éµÄÉúÐ§	101105 ±±¾©ÊÐÍ¨ÖÝÇø¾­¼Ã¿ª·¢Çø¾Û¸»Ô·²úÒµÔ°Çø¾ÛÏéÈý½Ö7ºÅÔº	±¾·¢Ã÷ÊµÊ©Àý¹«¿ªÁËÒ»ÖÖÊý¾Ý±£»¤·½·¨¡¢ÒÆ¶¯ÖÕ¶Ë¼°´æ´¢½éÖÊ¡£±¾·¢Ã÷ÊµÊ©Àý·½·¨°üÀ¨£º¹ý¼ì²âµ±Ç°Ê±¼äÊÇ·ñ´¦ÓÚÓÃ»§Ô¤ÏÈÉèÖÃµÄÒÆ¶¯ÖÕ¶Ë°²È«Ê¹ÓÃÆÚÄÚ£»ÈôÊÇ£¬ÔòÔÚÓÃ»§Ê¹ÓÃÒÆ¶¯ÖÕ¶ËÐèÒªÉí·ÝÑéÖ¤Ê±£¬Ê¹ÓÃµÚÒ»ÑéÖ¤·½Ê½½øÐÐÉí·ÝÑéÖ¤£»Èô·ñ£¬ÔòÔÚÓÃ»§Ê¹ÓÃÒÆ¶¯ÖÕ¶ËÐèÒªÉí·ÝÑéÖ¤Ê±£¬Ê¹ÓÃµÚ¶þÑéÖ¤·½Ê½½øÐÐÉí·ÝÑéÖ¤¡£±¾·¢Ã÷ÊµÊ©ÀýÖÐÍ¨¹ýÉèÖÃ°²È«Ê¹ÓÃÆÚ£¬ÔÚ·Ç°²È«ÊÔÓÃÆÚÄÚ£¬Ê¹ÓÃµÚÒ»ÑéÖ¤·½Ê½½øÐÐÉí·ÝÑéÖ¤£¬ÔÚ°²È«Ê¹ÓÃÆÚÄÚ£¬Ê¹ÓÃµÚ¶þÉí·ÝÑéÖ¤·½Ê½½…	°²È«
Ò»ÖÖÆóÒµ½ðÈÚÖÕ¶ËÉè±¸µÄ¼¤»î·½·¨¼°ÏµÍ³	¹ã¶«Íø½ð¿Ø¹É¹É·ÝÓÐÏÞ¹«Ë¾	2017-05-31	2017-11-24	CN107392005A	Ö÷·ÖÀàºÅ£ºG06F21/44(2013.01)I	ÔÚÉó-ÊµÖÊÉó²éµÄÉúÐ§	510000 ¹ã¶«Ê¡¹ãÖÝÊÐÌìºÓÇøÖé½­¶«Â·28ºÅÔ½Ðã½ðÈÚ´óÏÃ19-20²ã	±¾·¢Ã÷Éæ¼°Ò»ÖÖÆóÒµ½ðÈÚÖÕ¶ËÉè±¸µÄ¼¤»î·½·¨¼°ÏµÍ³£¬°üÀ¨½«Éè±¸±àºÅÓëÔ¤ÉèÉè±¸ÐÅÏ¢½øÐÐ·ÖÅä¹ØÁª£¬ÆäÖÐËùÊöÔ¤ÉèÉè±¸ÐÅÏ¢ÖÁÉÙ°üÀ¨Ô¤´æ¼¤»îÂë£»ÀûÓÃ´ý¼¤»îÉè±¸µÄ¼¤»îÂëÆô¶¯ËùÊö´ý¼¤»îÉè±¸²¢·¢ËÍ¼¤»îÇëÇó£»½ÓÊÕËùÊö¼¤»îÇëÇó£¬ËùÊö¼¤»îÇëÇóµÄÇëÇóÐÅÏ¢°üÀ¨ËùÊö´ý¼¤»îÉè±¸µÄÉè±¸±àºÅÒÔ¼°¼¤»îÂë£»ÅÐ¶ÏËùÊö´ý¼¤»îÉè±¸µÄ¼¤»îÂëÊÇ·ñÓëËùÊö´ý¼¤»îÉè±¸µÄÉè±¸±àºÅ¹ØÁªµÄÔ¤´æ¼¤»îÂëÏàÍ¬£»ÈôËùÊö´ý¼¤»îÉè±¸µÄ¼¤»îÂëÓëËùÊö´ý¼¤»îÉè±¸µÄÉè±¸±àºÅ¹ØÁªµ…	°²È«
Ò»ÖÖÃô¸ÐÐÅÏ¢±£»¤·½·¨¡¢ÖÕ¶Ë¼°¼ÆËã»ú¿É¶Á´æ´¢½éÖÊ	Å¬±ÈÑÇ¼¼ÊõÓÐÏÞ¹«Ë¾	2017-06-05	2017-11-24	CN107392034A	Ö÷·ÖÀàºÅ£ºG06F21/60(2013.01)I	ÔÚÉó-ÊµÖÊÉó²éµÄÉúÐ§	518057 ¹ã¶«Ê¡ÉîÛÚÊÐÄÏÉ½Çø¸ßÐÂÔ°±±»·´óµÀ9018ºÅ´ó×å´´ÐÂ´óÏÃA×ù10Â¥	±¾·¢Ã÷¹«¿ªÁËÒ»ÖÖÃô¸ÐÐÅÏ¢±£»¤·½·¨¡¢ÖÕ¶Ë¼°¼ÆËã»ú¿É¶Á´æ´¢½éÖÊ£¬Í¨¹ýÔÚÖÕ¶ËÄÚÖÃ°²È«Ð¾Æ¬£¬²¢ÔÚ°²È«Ð¾Æ¬ÖÐ°²×°ÓëÃô¸ÐÓ¦ÓÃ³ÌÐò¶ÔÓ¦µÄÐ¡Ó¦ÓÃ³ÌÐò¡£µ±»ñÈ¡µ½À´×Ô¸ÃÃô¸ÐÓ¦ÓÃ³ÌÐòÇÒÐèÒªÉÏ´«ÖÁ·þÎñÆ÷µÄµÚÒ»Ãô¸ÐÐÅÏ¢Ê±£¬½«¸ÃµÚÒ»Ãô¸ÐÐÅÏ¢·¢ËÍ¸ø°²È«Ð¾Æ¬£¬ÓÉ°²È«Ð¾Æ¬¶ÔÆä½øÐÐ¼ÓÃÜ£¬²¢ÔÚ¼ÓÃÜÖ®ºó£¬½«µÚÒ»Ãô¸ÐÐÅÏ¢·¢ËÍ¸ø·þÎñÆ÷¡£Ò»·½Ãæ£¬Ïà¶ÔÓÚÍ¨¹ýÈí¼þ¼ÓÃÜµÄ·½Ê½¶øÑÔ£¬°²È«Ð¾Æ¬Ó²¼þ¼ÓÃÜÄÜ¹»¸üÓÐÐ§µØ·ÀÖ¹ºÚ¿Í¹¥»÷ÒÔ¼°²¡¶¾ÆÆ»µ£¬¸üºÃµØ±£Ö¤ÓÃ»…	°²È«
Ò»ÖÖ¾ßÓÐÔ¶³Ì·ÃÎÊ¹¦ÄÜµÄ²ÆÎñ¹ÜÀí·½·¨	Ì«²Öºè²ßÌÚ´ïÍøÂç¿Æ¼¼ÓÐÏÞ¹«Ë¾	2017-06-06	2017-11-03	CN107315963A	Ö÷·ÖÀàºÅ£ºG06F21/60(2013.01)I	ÔÚÉó-ÊµÖÊÉó²éµÄÉúÐ§	215400 ½­ËÕÊ¡ËÕÖÝÊÐÌ«²ÖÊÐ¿Æ½ÌÐÂ³Ç½¡ÐÛÂ·20ºÅ	±¾·¢Ã÷¹«¿ªÁËÒ»ÖÖ¾ßÓÐÔ¶³Ì·ÃÎÊ¹¦ÄÜµÄ²ÆÎñ¹ÜÀí·½·¨£¬°üÀ¨ÈçÏÂÄÚÈÝ£ºÔÚÓÃ»§³É¹¦Á¬½ÓÉÏ²ÆÎñ¹ÜÀíÏµÍ³ºó£»ÓÃ»§ÔÚÐÅÏ¢ÈÏÖ¤×¼È·ºóÁ¬½Ó²ÆÎñ¹ÜÀíÄ£¿é£¬½ÓÊÕÓÃ»§µÄÇëÇó²¢½øÐÐÏàÓ¦µÄ²ÆÎñ´¦Àí£»ÔÚ²ÆÎñ¹ÜÀíÏµÍ³ÅäÖÃÓÐ°²È«¼à¿ØÏµÍ³£¬ÓÃÓÚÊµÊ±¼à¿Ø²ÆÎñ¹ÜÀíÏµÍ³µÄÃ¿Ò»¸öÄ£¿é¼°Æä¶¯Ì¬²Ù×÷£»°²È«¼à¿ØÏµÍ³ÔÚ²ÆÎñ¹ÜÀíÏµÍ³°üº¬µÄÊý¾Ý¿âµÄÇ°¶ËÉèÖÃÓÐ¼ÓÃÜÄ£¿é£»µ¥´Î·ÃÎÊÊý¾Ý¿â²Ù×÷ºó£¬ÔÚÓÃ»§ÔÊÐíµÄ×´Ì¬ÏÂ×Ô¶¯¶ÔÊý¾Ý¿â½øÐÐÉÏËø¡£±¾·¢Ã÷ÔÚÏµÍ³µÇÂ½ºÍÊý¾Ý·ÃÎ…	°²È«
Ò»ÖÖ²ÐÎÆºÍ²ÐÄ¤Ö§¸¶Éè±¸	ÖÓ½Ü¶«	2017-06-14	2019-01-04	CN109154956A	Ö÷·ÖÀàºÅ£ºG06F21/32(2006.01)I	ÔÚÉó-ÊµÖÊÉó²éµÄÉúÐ§	525200 ¹ã¶«Ê¡¸ßÖÝÊÐÊ¯¹ÄÕòÏòÑôÂ·14ºÅ	Ò»ÖÖ²ÐÎÆºÍ²ÐÄ¤Ö§¸¶Éè±¸£¬°üÀ¨²ÐÎÆºÍ²ÐÄ¤²É¼¯×°ÖÃ¡¢Ö§¸¶Ö¸ÎÆºÍºçÄ¤²É¼¯Æ÷(6)¼°´æ´¢ÓëÆ¥Åäµ¥Ôª(5)£¬ËùÊö²ÐÎÆºÍ²ÐÄ¤²É¼¯×°ÖÃÓÃÓÚÌáÈ¡ÓÃ»§µÄ²ÐÎÆºÍ/»ò²ÐÄ¤£¬ËùÊö²ÐÎÆÎª´ú±íÓÃ»§Ö¸ÎÆµÄ²¿·ÖÇøÓòµÄÖ¸ÎÆ£¬ËùÊö²ÐÄ¤Îª´ú±íÓÃ»§µÄ²¿·Ö¶ÀÁ¢ÌØÕ÷µãµÄºçÄ¤£¬ËùÊöÖ§¸¶Ö¸ÎÆºÍºçÄ¤²É¼¯Æ÷(6)ÓÃÓÚÓÃ»§Ö§¸¶Ê±ÌáÈ¡ÓÃ»§ÓëËùÊö²ÐÎÆºÍ/»ò²ÐÄ¤·Ö±ð¶ÔÓ¦µÄÖ¸ÎÆºÍºçÄ¤£¬ËùÊö´æ´¢ÓëÆ¥Åäµ¥Ôª(5)ÓÃÓÚµ±ÓÃ»§Ö§¸¶Ê±½«ËùÊö²ÐÎÆºÍ/»ò²ÐÄ¤·Ö±ðÓëËùÊöÖ¸ÎÆºÍ/»òºçÄ¤½øÐÐÆ…	Ö§¸¶
Ò»ÖÖ»ùÓÚÉñ¾­ÍøÂçµÄ°²È«±£»¤·½·¨¼°ÏµÍ³	¹ã¶«Íø½ð¿Ø¹É¹É·ÝÓÐÏÞ¹«Ë¾	2017-06-14	2017-11-07	CN107330309A	Ö÷·ÖÀàºÅ£ºG06F21/31(2013.01)I	ÔÚÉó-ÊµÖÊÉó²éµÄÉúÐ§	510000 ¹ã¶«Ê¡¹ãÖÝÊÐÌìºÓÇøÖé½­¶«Â·28ºÅÔ½Ðã½ðÈÚ´óÏÃ19-20²ã	±¾·¢Ã÷Éæ¼°Ò»ÖÖ»ùÓÚÉñ¾­ÍøÂçµÄ½ðÈÚÖÕ¶Ë°²È«±£»¤·½·¨¼°ÏµÍ³£¬ÆäÖÐËùÊö·½·¨°üÀ¨»ñÈ¡ÓëÓÃ»§ÕËºÅÏà¹ØÁªµÄÀúÊ·ÓÃ»§ÐÐÎªÌØÕ÷Êý¾ÝX	°²È«
Ò»ÖÖ±ãÐ¯Ê½½ðÈÚ·þÎñ¶Ë	³É¶¼ÓÅÐ¾Î¢µç×Ó¼¼ÊõÓÐÏÞ¹«Ë¾	2017-06-15	2017-11-17	CN107358760A	Ö÷·ÖÀàºÅ£ºG07F19/00(2006.01)I	ÔÚÉó-¹«¿ª	610000 ËÄ´¨Ê¡³É¶¼ÊÐ³É»ªÇø¶«Èý»·Â·¶þ¶ÎÁúÌ¶¹¤ÒµÔ°	±¾·¢Ã÷ÉæÒ»ÖÖ±ãÐ¯Ê½½ðÈÚ·þÎñ¶Ë£¬°üÀ¨±ãÐ¯ÖÕ¶ËºÍ·þÎñÆ÷ÖÕ¶Ë£»ËùÊö±ãÐ¯ÖÕ¶Ë°üÀ¨ÈË»ú½»»¥½çÃæÒÔ¼°ÓëÖ®µçÍ¨Á¬½ÓµÄÍ¨ÐÅÄ£¿é¡¢Éí·ÝÖ¤Ê¶±ðÄ£¿é¡¢Ö¸ÎÆÂ¼ÈëÄ£¿éºÍ½ðÈÚÄ£¿é£»ËùÊö·þÎñÆ÷ÖÕ¶Ë°üÀ¨Í¨ÐÅÄ£¿é¡¢Éí·ÝÐ£ÑéÄ£¿éºÍÖ¸Áî·¢ËÍÄ£¿é£»ËùÊö±ãÐ¯ÖÕ¶ËºÍ·þÎñÆ÷ÖÕ¶ËÖ®¼äÍ¨¹ýÍ¨ÐÅÄ£¿éÍê³ÉÍ¨ÐÅÁ¬½Ó¡£Í¨¹ýÉÏÊö·½Ê½£¬±¾·¢Ã÷½â¾öÁË´«Í³½ðÈÚÖÕ¶Ë´óÐÍ»¯µÄÎÊÌâ£¬Ê¹µÃ½ðÈÚÏà¹Ø¹¤×÷ÈËÔ±¿ÉÒÔÌá¸ß×Ô¼ºµÄ·þÎñÖÊÁ¿£¬Íê³ÉÌØ¶¨¿Í»§µÄÉÏÃÅ·þÎñ£¬ÌáÉýÐÐÒµÐÎÏó¡£	°²È«
Ò»ÖÖ×ÔÖú½ðÈÚ·þÎñÖÕ¶Ë	³É¶¼ÓÅÐ¾Î¢µç×Ó¼¼ÊõÓÐÏÞ¹«Ë¾	2017-06-15	2017-11-24	CN107393229A	Ö÷·ÖÀàºÅ£ºG07G1/12(2006.01)I	ÔÚÉó-¹«¿ª	610000 ËÄ´¨Ê¡³É¶¼ÊÐ³É»ªÇø¶«Èý»·Â·¶þ¶ÎÁúÌ¶¹¤ÒµÔ°	±¾·¢Ã÷ÉæÒ»ÖÖ×ÔÖú½ðÈÚ·þÎñÖÕ¶Ë£¬°üÀ¨¿Í»§ÖÕ¶ËºÍ·þÎñÆ÷ÖÕ¶Ë£»ËùÊö¿Í»§ÖÕ¶ËÓëÈË»ú½»»¥¶ËÍ¨¹ý½ô¼±ÀëÏß×°ÖÃÁ¬½Ó£¬ÈË»ú½»»¥¶Ë»¹Á¬½ÓÓÐ°²È«¹ÜÀí×°ÖÃ£¬Í¨¹ý°²È«¹ÜÀí×°ÖÃ¿ØÖÆ½ô¼±ÀëÏß×°ÖÃµÄ¿ª¹Ø£»ËùÊö¿Í»§ÖÕ¶ËºÍ·þÎñÆ÷ÖÕ¶ËÖ®¼äÍ¨¹ýÍ¨ÐÅÄ£¿éÍê³ÉÍ¨ÐÅÁ¬½Ó¡£Í¨¹ýÉÏÊö·½Ê½£¬±¾·¢Ã÷½â¾öÁË´«Í³½ðÈÚÖÕ¶Ë´óÐÍ»¯µÄÎÊÌâ£¬Ê¹µÃ½ð¿Í»§ÔÚ¼ÒÖÐ¾Í¿ÉÒÔÍ¨¹ý×¨ÃÅÉè±¸Íê³É½ðÈÚÏà¹Ø²Ù×÷£¬½â¾öÁËÔÚ¿í´øÍøÉÏ½øÐÐ½ðÈÚ»î¶¯µÄ·çÏÕ£¬Í¬Ê±°²È«¹ÜÀí×°ÖÃµÄÉèÖÃÌá¸ßÁË¸ÃÉ…	°²È«
Ö§¸¶ÀàÓ¦ÓÃ³ÌÐò¹ÜÀí·½·¨¡¢×°ÖÃ¼°ÒÆ¶¯ÖÕ¶Ë	¹ã¶«Å·çêÒÆ¶¯Í¨ÐÅÓÐÏÞ¹«Ë¾	2017-06-20	2017-11-03	CN107315947A	Ö÷·ÖÀàºÅ£ºG06F21/51(2013.01)I	ÔÚÉó-ÊµÖÊÉó²éµÄÉúÐ§	523860 ¹ã¶«Ê¡¶«Ý¸ÊÐ³¤°²ÕòÎÚÉ³º£±õÂ·18ºÅ	±¾·¢Ã÷¹«¿ªÁËÒ»ÖÖÖ§¸¶ÀàÓ¦ÓÃ³ÌÐò¹ÜÀí·½·¨¡¢Ö§¸¶ÀàÓ¦ÓÃ³ÌÐò¹ÜÀí×°ÖÃ¡¢ÒÆ¶¯ÖÕ¶Ë¼°¼ÆËã»ú¿É¶Á´æ´¢½éÖÊ£¬ÆäÖÐ£¬¸ÃÖ§¸¶ÀàÓ¦ÓÃ³ÌÐò¹ÜÀí·½·¨°üÀ¨£ºµ±½ÓÊÕµ½ÓÃÒÔÆô¶¯Ö§¸¶ÀàÓ¦ÓÃ³ÌÐòµÄÆô¶¯Ö¸ÁîÊ±£¬Õë¶ÔÉÏÊöÖ§¸¶ÀàÓ¦ÓÃ³ÌÐò´´½¨µÚÒ»½ø³ÌÀàÐÍµÄ½ø³Ì£»½«ÓëÉÏÊöÖ§¸¶ÀàÓ¦ÓÃ³ÌÐòÏà¹ØµÄÊý¾ÝÎÄ¼þµÄÀàÐÍÉèÎªµÚÒ»Êý¾ÝÎÄ¼þÀàÐÍ£»ÆäÖÐ£¬ÉÏÊöµÚÒ»½ø³ÌÀàÐÍ²»Í¬ÓÚÓ¦ÓÃ³ÌÐòµÄÄ¬ÈÏ½ø³ÌÀàÐÍ£¬ÇÒÉÏÊöµÚÒ»Êý¾ÝÎÄ¼þÀàÐÍ²»Í¬ÓÚÓ¦ÓÃ³ÌÐòµÄÄ¬ÈÏÊý¾ÝÎÄ¼þÀàÐÍ£¬ÇÒÉÏÊöµ…	Ö§¸¶
Ö§¸¶ÀàÓ¦ÓÃ³ÌÐò¹ÜÀí·½·¨¡¢×°ÖÃ¼°ÒÆ¶¯ÖÕ¶Ë	¹ã¶«Å·çêÒÆ¶¯Í¨ÐÅÓÐÏÞ¹«Ë¾	2017-06-20	2017-10-17	CN107256356A	Ö÷·ÖÀàºÅ£ºG06F21/51(2013.01)I	ÔÚÉó-ÊµÖÊÉó²éµÄÉúÐ§	523860 ¹ã¶«Ê¡¶«Ý¸ÊÐ³¤°²ÕòÎÚÉ³º£±õÂ·18ºÅ	±¾·¢Ã÷¹«¿ªÁËÒ»ÖÖÖ§¸¶ÀàÓ¦ÓÃ³ÌÐò¹ÜÀí·½·¨¡¢Ö§¸¶ÀàÓ¦ÓÃ³ÌÐò¹ÜÀí×°ÖÃ¡¢ÒÆ¶¯ÖÕ¶Ë¼°¼ÆËã»ú¿É¶Á´æ´¢½éÖÊ£¬ÆäÖÐ£¬¸ÃÖ§¸¶ÀàÓ¦ÓÃ³ÌÐò¹ÜÀí·½·¨°üÀ¨Õë¶ÔÒÑ°²×°µÄÖ§¸¶ÀàÓ¦ÓÃ³ÌÐò£¬Í¨¹ýÏµÍ³²ã¶ÔÍâÆÁ±ÎËùÊöÖ§¸¶ÀàÓ¦ÓÃ³ÌÐòµÄÏà¹ØÐÅÏ¢£¬ÆäÖÐ£¬ËùÊöÏà¹ØÐÅÏ¢°üÀ¨£º°²×°ÐÅÏ¢£»µ±¼àÌýµ½Õë¶ÔËùÊöÖ§¸¶ÀàÓ¦ÓÃ³ÌÐòµÄÆô¶¯ÊÂ¼þÊ±£¬¼ì²âËùÊöÆô¶¯ÊÂ¼þÊÇ·ñÓÉÆäËüÓ¦ÓÃ³ÌÐò´¥·¢£»ÈôËùÊöÆô¶¯ÊÂ¼þÓÉÆäËüÓ¦ÓÃ³ÌÐò´¥·¢£¬ÔòÊä³öÆô¶¯ÌáÊ¾¿Ø¼þ»ò½ûÖ¹ËùÊöÖ§¸¶ÀàÓ¦ÓÃ³ÌÐòÆ…	Ö§¸¶
¾ßÓÐ°²È«ÊäÈëÄ£¿éµÄPOSÖÕ¶Ë	ÉÏº£ÉÌÃ×¿Æ¼¼ÓÐÏÞ¹«Ë¾	2017-06-21	2018-12-28	CN109101799A	Ö÷·ÖÀàºÅ£ºG06F21/32(2013.01)I	ÔÚÉó-¹«¿ª	200433 ÉÏº£ÊÐÑîÆÖÇøäÁ»¦Â·388ºÅ´´ÖÇÌìµØ7ºÅÂ¥605	±¾·¢Ã÷¹«¿ªÁËÒ»ÖÖ¾ßÓÐ°²È«ÊäÈëÄ£¿éµÄPOSÖÕ¶Ë£¬°üÀ¨´¥ÃþÏÔÊ¾Ä£¿é£¬ÖÐÑë´¦ÀíÄ£¿é£¬Ö¸ÎÆÊ¶±ðÄ£¿é£¬ÇÒÖ¸ÎÆÊ¶±ðÄ£¿éÓÃÓÚ¼ì²âÓÃ»§µÄÖ¸ÎÆÐÅÏ¢£¬ÅÐ¶ÏÊÇ·ñÊôÓÚºÏ·¨ÓÃ»§£»´¥ÃþÏÔÊ¾Ä£¿éÓÃÓÚ½ÓÊÕÓÃ»§ÊäÈëµÄÃÜÂëÐÅÏ¢£»ÖÐÑë´¦ÀíÄ£¿éÓÃÓÚÅÐ¶ÏËùÊöÃÜÂëÐÅÏ¢ÓëËùÊöÖ¸ÎÆÐÅÏ¢ÊÇ·ñÆ¥Åä¡£±¾·¢Ã÷µÄPOSÖÕ¶ËÍ¬Ê±¾ßÓÐÃÜÂëÊäÈëºÍÖ¸ÎÆÑéÖ¤¹¦ÄÜ£¬ÔöÇ¿POSÖÕ¶ËµÄ°²È«ÐÔ£¬Ò²±ãÓÚÓÃ»§Ê¹ÓÃ¡£	°²È«
Ò»ÖÖµç×ÓÉÌÎñ°²È«´¦ÀíÏµÍ³	Ì«²ÖÊÐ»ª°²ÆóÒµ¹ÜÀíÓÐÏÞ¹«Ë¾	2017-06-26	2017-11-14	CN107346396A	Ö÷·ÖÀàºÅ£ºG06F21/60(2013.01)I	ÓÐÐ§-ÊµÖÊÉó²éµÄÉúÐ§	215400 ½­ËÕÊ¡ËÕÖÝÊÐÌ«²ÖÊÐ¿ª·¢Çø±±¾©¶«Â·88ºÅÖÐB´±ÈýÂ¥	±¾·¢Ã÷¹«¿ªÁËÒ»ÖÖµç×ÓÉÌÎñ°²È«´¦ÀíÏµÍ³£¬°üÀ¨ÖÐÐÄÊý¾Ý¿âÏµÍ³¡¢ÖÐÐÄ·þÎñÆ÷¡¢´æ´¢Æ÷ºÍCAÈÏÖ¤ÖÐÐÄ£¬ÖÐÐÄÊý¾Ý¿âÏµÍ³ÓëÖÐÐÄ·þÎñÆ÷ÏàÁ¬£¬ÖÐÐÄ·þÎñÆ÷ÓëCAÈÏÖ¤ÖÐÐÄÏàÁ¬£¬ÖÐÐÄÊý¾Ý¿âÏµÍ³ÖÐµÄÐÅÏ¢´æ´¢ÔÚ´æ´¢Æ÷ÖÐ¡£±¾·¢Ã÷µÄÓÐÒæÐ§¹ûÊÇ£ºÏµÍ³°²È«¿É¿¿£¬Ò×ÓÚÍÆ¹ã£¬ÄÜÓÐÐ§µØ·ÀÖ¹·Ç·¨¹¥»÷£¬·½±ã½ÓÊÕ¡¢´æ´¢ºÍ´¦ÀíÊý¾Ý£¬Ìá¸ßÁË°²È«ÐÔÄÜ£¬Âú×ãÐèÇó¡£	°²È«
Ö§¸¶ÀàÓ¦ÓÃ³ÌÐò¹ÜÀí·½·¨¡¢×°ÖÃ¼°ÒÆ¶¯ÖÕ¶Ë	¹ã¶«Å·çêÒÆ¶¯Í¨ÐÅÓÐÏÞ¹«Ë¾	2017-06-27	2017-09-29	CN107220538A	Ö÷·ÖÀàºÅ£ºG06F21/52(2013.01)I	ÔÚÉó-ÊµÖÊÉó²éµÄÉúÐ§	523860 ¹ã¶«Ê¡¶«Ý¸ÊÐ³¤°²ÕòÎÚÉ³º£±õÂ·18ºÅ	±¾·¢Ã÷¹«¿ªÁËÒ»ÖÖÖ§¸¶ÀàÓ¦ÓÃ³ÌÐò¹ÜÀí·½·¨¡¢Ö§¸¶ÀàÓ¦ÓÃ³ÌÐò¹ÜÀí×°ÖÃ¡¢ÒÆ¶¯ÖÕ¶Ë¼°¼ÆËã»ú¿É¶Á´æ´¢½éÖÊ£¬ÆäÖÐ£¬¸ÃÖ§¸¶ÀàÓ¦ÓÃ³ÌÐò¹ÜÀí·½·¨°üÀ¨£ºµ±Ö§¸¶ÀàÓ¦ÓÃ³ÌÐòÆô¶¯Ê±£¬½«ËùÊöÖ§¸¶ÀàÓ¦ÓÃ³ÌÐòÓëÔ¤ÏÈ°²×°µÄÎ±Ó¦ÓÃ³ÌÐò¹ØÁª£»µ±½ÓÊÕµ½Õë¶ÔËùÊöÖ§¸¶ÀàÓ¦ÓÃ³ÌÐòµÄÓ¦ÓÃÐÅÏ¢²éÑ¯ÇëÇóÊ±£¬·µ»ØËùÊöÎ±Ó¦ÓÃ³ÌÐòµÄÓ¦ÓÃÐÅÏ¢ÒÔÏìÓ¦ËùÊöÓ¦ÓÃÐÅÏ¢²éÑ¯ÇëÇó¡£±¾·¢Ã÷Ìá¹©µÄ¼¼Êõ·½°¸ÄÜ¹»ÓÐÐ§Ìá¸ßÒÆ¶¯Ö§¸¶µÄ°²È«ÐÔ¡£	Ö§¸¶
Ò»ÖÖÆóÒµ°²È«Í¶×Ê´¦ÀíÏµÍ³	Ì«²ÖÊÐ»ª°²ÆóÒµ¹ÜÀíÓÐÏÞ¹«Ë¾	2017-06-27	2017-10-13	CN107247892A	Ö÷·ÖÀàºÅ£ºG06F21/31(2013.01)I	ÓÐÐ§-ÊµÖÊÉó²éµÄÉúÐ§	215400 ½­ËÕÊ¡ËÕÖÝÊÐÌ«²ÖÊÐ¿ª·¢Çø±±¾©¶«Â·88ºÅÖÐB´±ÈýÂ¥	±¾·¢Ã÷¹«¿ªÁËÒ»ÖÖÆóÒµ°²È«Í¶×Ê´¦ÀíÏµÍ³£¬°üÀ¨·þÎñÄ£¿é¡¢ÖÐÐÄÊý¾Ý´¦ÀíÄ£¿é¡¢ÐÅÏ¢½ÓÊÕÄ£¿é¡¢Í¶×ÊÈÚ×Ê·þÎñÆ÷ºÍÍ¶×Ê¿Í»§¶Ë½ÓÈëÉè±¸£¬ÖÐÐÄÊý¾Ý´¦ÀíÄ£¿éÓë·þÎñÄ£¿éÏàÁ¬£¬ÐÅÏ¢½ÓÊÕÄ£¿éÓëÍ¶×Ê¿Í»§¶Ë½ÓÈëÉè±¸ÏàÁ¬£¬Í¶×Ê¿Í»§¶Ë½ÓÈëÉè±¸ÓëÍ¶×ÊÈÚ×Ê·þÎñÆ÷ÏàÁ¬£¬ÖÐÐÄÊý¾Ý´¦ÀíÄ£¿éÓëÍ¶×ÊÈÚ×Ê·þÎñÆ÷ÏàÁ¬£¬Í¶×ÊÈÚ×Ê·þÎñÆ÷Í¨¹ý°²È«±£»¤Ä£¿é½øÐÐ±£»¤£¬Í¶×ÊÈÚ×Ê·þÎñÆ÷Í¨¹ý°²È«±£»¤Ä£¿é½øÐÐ±£»¤¡£±¾·¢Ã÷µÄÓÐÒæÐ§¹ûÊÇ£º±ãÓÚÍ¶×Ê¹ÜÀí£¬ÊµÏÖÁËÖÇÄÜ»¯ºÍ·½±…	°²È«
Ö§¸¶ÀàÓ¦ÓÃ³ÌÐòÏÂÔØ·À»¤·½·¨¡¢×°ÖÃ¼°ÒÆ¶¯ÖÕ¶Ë	¹ã¶«Å·çêÒÆ¶¯Í¨ÐÅÓÐÏÞ¹«Ë¾	2017-06-28	2017-10-27	CN107301334A	Ö÷·ÖÀàºÅ£ºG06F21/12(2013.01)I	ÔÚÉó-ÊµÖÊÉó²éµÄÉúÐ§	523860 ¹ã¶«Ê¡¶«Ý¸ÊÐ³¤°²ÕòÎÚÉ³º£±õÂ·18ºÅ	±¾·¢Ã÷¹«¿ªÁËÒ»ÖÖÖ§¸¶ÀàÓ¦ÓÃ³ÌÐòÏÂÔØ·À»¤·½·¨¡¢Ö§¸¶ÀàÓ¦ÓÃ³ÌÐòÏÂÔØ·À»¤×°ÖÃ¡¢ÒÆ¶¯ÖÕ¶Ë¼°¼ÆËã»ú¿É¶Á´æ´¢½éÖÊ£¬ÆäÖÐ£¬¸ÃÖ§¸¶ÀàÓ¦ÓÃ³ÌÐòÏÂÔØ·À»¤·½·¨°üÀ¨£º¼ì²âµ±Ç°Ëù·ÃÎÊµÄÒ³ÃæÊÇ·ñÎªÖ§¸¶ÀàÓ¦ÓÃ³ÌÐòµÄÏÂÔØÒ³Ãæ£¬ÆäÖÐ£¬ËùÊöÖ§¸¶ÀàÓ¦ÓÃ³ÌÐòµÄÏÂÔØÒ³Ãæ°üº¬ËùÊöÖ§¸¶ÀàÓ¦ÓÃ³ÌÐòµÄÏÂÔØÈë¿Ú£»Èô¼ì²âµ½µ±Ç°Ëù·ÃÎÊµÄÒ³ÃæÎªÖ§¸¶ÀàÓ¦ÓÃ³ÌÐòµÄÏÂÔØÒ³Ãæ£¬Ôò¼ì²âËùÊöÒ³ÃæÊÇ·ñ´æÔÚÐü¸¡¿Ø¼þ£»Èô¼ì²âµ½´æÔÚÐü¸¡¿Ø¼þ£¬Ôò¶ÔËùÊöÒ³ÃæÖÐµÄÐü¸¡¿Ø¼þ½øÐÐÆÁ±…	°²È«
Ö§¸¶ÀàÓ¦ÓÃ³ÌÐò¹ÜÀí·½·¨¡¢×°ÖÃ¼°ÒÆ¶¯ÖÕ¶Ë	¹ã¶«Å·çêÒÆ¶¯Í¨ÐÅÓÐÏÞ¹«Ë¾	2017-06-28	2017-10-24	CN107292614A	Ö÷·ÖÀàºÅ£ºG06Q20/32(2012.01)I	ÔÚÉó-ÊµÖÊÉó²éµÄÉúÐ§	523860 ¹ã¶«Ê¡¶«Ý¸ÊÐ³¤°²ÕòÎÚÉ³º£±õÂ·18ºÅ	±¾·¢Ã÷¹«¿ªÁËÒ»ÖÖÖ§¸¶ÀàÓ¦ÓÃ³ÌÐò¹ÜÀí·½·¨¡¢Ö§¸¶ÀàÓ¦ÓÃ³ÌÐò¹ÜÀí×°ÖÃ¡¢ÒÆ¶¯ÖÕ¶Ë¼°¼ÆËã»ú¿É¶Á´æ´¢½éÖÊ£¬ÆäÖÐ£¬¸ÃÖ§¸¶ÀàÓ¦ÓÃ³ÌÐò¹ÜÀí·½·¨°üÀ¨£ºµ±Ö§¸¶ÀàÓ¦ÓÃ³ÌÐòÆô¶¯Ê±£¬½«ËùÊöÖ§¸¶ÀàÓ¦ÓÃ³ÌÐòµÄÕæÊµ½ø³ÌÓëÖÁÉÙÒ»¸öÎ±½ø³Ì¹ØÁª£¬ÆäÖÐ£¬»ùÓÚËùÊöÎ±½ø³ÌÎÞ·¨·ÃÎÊËùÊöÖ§¸¶ÀàÓ¦ÓÃ³ÌÐòµÄÐÅÏ¢£»µ±½ÓÊÕµ½Õë¶ÔËùÊöÖ§¸¶ÀàÓ¦ÓÃ³ÌÐòµÄ½ø³Ì²éÑ¯ÇëÇóÊ±£¬·µ»ØÓëËùÊöÕæÊµ½ø³Ì¹ØÁªµÄÒ»Î±½ø³ÌµÄ½ø³ÌÐÅÏ¢£¬ÒÔÏìÓ¦ËùÊö½ø³Ì²éÑ¯ÇëÇó¡£±¾·¢Ã÷Ìá¹©µÄ¼¼Êõ·½°¸ÄÜ¹…	Ö§¸¶
Ò»ÖÖ»¥ÁªÍø½ðÈÚ·´ÆÛÕ©ÏµÍ³	¸ñ¾ÖÉÌÑ§½ÌÓý¿Æ¼¼£¨ÉîÛÚ£©ÓÐÏÞ¹«Ë¾	2017-06-29	2019-01-15	CN109214177A	Ö÷·ÖÀàºÅ£ºG06F21/56(2013.01)I	ÔÚÉó-ÊµÖÊÉó²éµÄÉúÐ§	518063 ¹ã¶«Ê¡ÉîÛÚÊÐÄÏÉ½Çø¿ÆÔ·ÄÏÂ·3099ºÅÖÐ¹ú´¢ÄÜ´óÏÃ33Â¥Cµ¥Î»	±¾·¢Ã÷Ìá¹©Ò»ÖÖ»¥ÁªÍø½ðÈÚÆ½Ì¨·´ÆÛÕ©ÏµÍ³£¬ÆäÌØÕ÷ÔÚÓÚ£¬°üÀ¨°²È«±£»¤Ä£¿é£¬ËùÊö°²È«±£»¤Ä£¿é½øÒ»²½°üÀ¨½Ó¿Ú°²È«±£»¤µ¥Ôª¡¢¶ÌÐÅÍ¨µÀ±£»¤µ¥Ôª¡¢Ö§¸¶°²È«±£»¤µ¥Ôª¡¢ÎÄ±¾ÄÚÈÝ°²È«µ¥ÔªºÍÍ¼ÏñÄÚÈÝ°²È«µ¥Ôª¡£±¾·¢Ã÷ËùÊö·½°¸¾ßÓÐÊ¹µÃÄ¿±ê»¥ÁªÍø½ðÈÚÆ½Ì¨±ÜÃâ±»ÆÛÕ©ÐÐÎª¹¥»÷µÄÓÐÒæÐ§¹û¡£	°²È«
Êý¾Ý¼ÓÃÜ·½·¨¡¢½âÃÜ·½·¨¡¢¼ÓÃÜ×°ÖÃºÍ½âÃÜ×°ÖÃ	±±¾©¾©¶«ÉÐ¿ÆÐÅÏ¢¼¼ÊõÓÐÏÞ¹«Ë¾	2017-06-29	2017-10-24	CN107292197A	Ö÷·ÖÀàºÅ£ºG06F21/62(2013.01)I	ÔÚÉó-ÊµÖÊÉó²éµÄÉúÐ§	100195 ±±¾©ÊÐº£µíÇøÐÓÊ¯¿ÚÂ·65ºÅÎ÷É¼´´ÒâÔ°ËÄÇø11ºÅÂ¥¶«¶Î1-4²ãÎ÷¶Î1-4²ã	±¾·¢Ã÷ÊµÊ©ÀýÌá¹©Ò»ÖÖÊý¾Ý¼ÓÃÜ·½·¨¡¢½âÃÜ·½·¨¡¢¼ÓÃÜ×°ÖÃºÍ½âÃÜ×°ÖÃ£¬Éæ¼°¼ÆËã»ú¼¼ÊõÁìÓò¡£±¾·¢Ã÷ÊµÊ©ÀýµÄÊý¾Ý¼ÓÃÜ·½·¨°üÀ¨ÒÔÏÂ²½Öè£º½«ÎªÔ­Ê¼Êý¾ÝÉè¶¨µÄÃØÔ¿°´ÕÕÔ¤ÉèÒÆÎ»Êý½øÐÐÒÆÎ»ºóÓëÔ­Ê¼Êý¾Ý½øÐÐÒì»òÔËËã£»½«¾­Òì»òÔËËãµÃµ½µÄÊý¾Ý°´ÕÕÔ­Ê¼Êý¾ÝµÄ×Ö·ûË³Ðò½øÐÐÁ¬½ÓÒÔµÃµ½ÖÐ¼ä¼ÓÃÜÊý¾Ý£»½«Ô­Ê¼Êý¾ÝÓëÃØÔ¿½øÐÐÏà¼ÓÔËËã£¬½«Ïà¼ÓµÃµ½µÄÊý¾ÝÓëÔ¤ÉèµÄµÚÒ»Òò×ÓÏà³ËºóÔÙÓëÔ¤ÉèµÄµÚ¶þÒò×ÓÏà¼ÓÒÔµÃµ½µÚÒ»ÐÂÃØÔ¿£»½«ÖÐ¼ä¼ÓÃÜÊý¾Ý°´Î»ÓëµÚÒ»Ò…	°²È«
Ó¦ÓÃËÑË÷·½·¨¡¢ÒÆ¶¯ÖÕ¶Ë¼°¼ÆËã»ú¿É¶Á´æ´¢½éÖÊ	¹ã¶«Å·çêÒÆ¶¯Í¨ÐÅÓÐÏÞ¹«Ë¾	2017-06-29	2017-11-07	CN107330058A	Ö÷·ÖÀàºÅ£ºG06F17/30(2006.01)I	ÔÚÉó-ÊµÖÊÉó²éµÄÉúÐ§	523860 ¹ã¶«Ê¡¶«Ý¸ÊÐ³¤°²ÕòÎÚÉ³º£±õÂ·18ºÅ	±¾·¢Ã÷ÊÊÓÃÓÚÍ¨ÐÅ¼¼ÊõÁìÓò£¬Ìá¹©ÁËÓ¦ÓÃËÑË÷·½·¨¡¢ÒÆ¶¯ÖÕ¶Ë¼°¼ÆËã»ú¿É¶Á´æ´¢½éÖÊ£¬ËùÊöÓ¦ÓÃËÑË÷·½·¨°üÀ¨£º½ÓÊÕÓÃ»§ÔÚä¯ÀÀÆ÷µÄËÑË÷¿òÖÐÊäÈëµÄ¹Ø¼ü´Ê£»Èô¹Ø¼ü´ÊÂú×ãÔ¤ÉèÌõ¼þ£¬Ôò½«¹Ø¼ü´Ê·¢ËÍÖÁ·þÎñÆ÷£¬·þÎñÆ÷ÔÚ½ÓÊÕµ½¹Ø¼ü´Êºó£¬¸ù¾Ý¹Ø¼ü´ÊÈ·¶¨ËùÒªËÑË÷µÄÓ¦ÓÃµÄÀàÐÍ£¬Èô¸ÃÀàÐÍÎªÔ¤ÉèÀàÐÍ£¬Ôò¼ì²âÔ¤ÉèÀàÐÍ¶ÔÓ¦µÄÈÏÖ¤±íÖÐÊÇ·ñ´æÔÚÓë¹Ø¼ü´ÊÏàÆ¥ÅäµÄÓ¦ÓÃ£¬ÈôÊÇ£¬Ôò½«°üº¬¸ÃÓ¦ÓÃµÄÒ³ÃæÐÅÏ¢·¢ËÍÖÁÒÆ¶¯ÖÕ¶Ë£»ÔÚ½ÓÊÕµ½·þÎñÆ÷·¢ËÍµÄÒ³ÃæÐÅÏ¢ºó£…	°²È«
Ò»ÖÖPOS»ú	ËÕÖÝÊÐ¹ú¾§µç×Ó¿Æ¼¼ÓÐÏÞ¹«Ë¾	2017-06-29	2017-09-15	CN107170155A	Ö÷·ÖÀàºÅ£ºG07G1/12(2006.01)I	ÔÚÉó-ÊµÖÊÉó²éµÄÉúÐ§	215153 ½­ËÕÊ¡ËÕÖÝÊÐ¸ßÐÂÇøÍ¨°²Õò»ª½ðÂ·255ºÅ	±¾·¢Ã÷¹«¿ªÁËÒ»ÖÖPOS»ú£¬°üÀ¨POS»ú±¾Ìå£¨1£©£¬ËùÊöPOS»ú±¾Ìå£¨1£©ÉèÖÃÓÚÏäÌå£¨2£©ÄÚ£¬ËùÊöÏäÌå£¨2£©µÄÒ»¶¥½Ç´¦ÇãÐ±ÉèÖÃÓÐÄÜ¹»ÕÕÉäËùÊöPOS»ú±¾Ìå£¨1£©ÉÏµÄÖÁÉÙÒ»¸ö°´¼üµÄµÚÒ»Æ½Ãæ¾µ£¨3£©£¬ËùÊöµÚÒ»Æ½Ãæ¾µ£¨3£©µÄ¶ÔÃæÇãÐ±ÉèÖÃÓÐµÚ¶þÆ½Ãæ¾µ£¨4£©£¬ËùÊöµÚÒ»Æ½Ãæ¾µ£¨3£©ºÍµÚ¶þÆ½Ãæ¾µ£¨4£©µÄ¾µÃæÏà¶Ô£¬ËùÊöÏäÌå£¨2£©¶¥¶Ë¿ªÓÐÍ¸¹â¿×£¨5£©£¬ËùÊöµÚ¶þÆ½Ãæ¾µ£¨4£©µÄ¹âÂ·Í¨¹ýËùÊöÍ¸¹â¿×£¨5£©£¬ËùÊöÏäÌå£¨2£©ÄÚÉèÖÃÓÐÕÕÃ÷×°ÖÃ£¬ËùÊöÏäÌå£¨2£©É…	°²È«
¼øÈ¨·½·¨¡¢¼øÈ¨Éè±¸ºÍ¼øÈ¨ÏµÍ³	ÉîÛÚÊÐ»ã¶¥¿Æ¼¼¹É·ÝÓÐÏÞ¹«Ë¾	2017-06-30	2019-06-18	CN109906452A	Ö÷·ÖÀàºÅ£ºG06F21/32(2006.01)I	ÔÚÉó-¹«¿ª	518045 ¹ã¶«Ê¡ÉîÛÚÊÐ¸£Ìï±£Ë°ÇøÌÚ·É¹¤Òµ´óÏÃB×ù13²ã	±¾ÉêÇëÌá¹©ÁËÒ»ÖÖ¼øÈ¨·½·¨¡¢¼øÈ¨Éè±¸ºÍ¼øÈ¨ÏµÍ³£¬¸ù¾Ý¿Í»§¶ËÉè±¸µÄ±êÊ¶£¬ÒÔ¼°´æ´¢µÄ¶à¸öÃèÊöÂëºÍ¶à¸öÉúÎïÌØÕ÷ÐÅÏ¢£¬¶Ô¿Í»§¶ËÉè±¸½øÐÐ¼øÈ¨£¬´Ó¶ø£¬Ìá¸ßÁËµç×ÓÉè±¸Ö®¼ä½øÐÐ·ÃÎÊµÄ°²È«ÐÔ¡£¸Ã·½·¨°üÀ¨£º»ñÈ¡Ä¿±ê¿Í»§¶ËÉè±¸µÄ±êÊ¶£»¸ù¾Ý¸ÃÄ¿±ê¿Í»§¶ËÉè±¸µÄ±êÊ¶¡¢´æ´¢µÄ¶à¸öÃèÊöÂëºÍ´æ´¢µÄ¶à¸öÉúÎïÌØÕ÷ÐÅÏ¢£¬¶Ô¸ÃÄ¿±ê¿Í»§¶ËÉè±¸½øÐÐ¼øÈ¨£¬ÆäÖÐ£¬´æ´¢µÄ¶à¸öÃèÊöÂëºÍ´æ´¢µÄ¶à¸öÉúÎïÌØÕ÷ÐÅÏ¢Ò»Ò»¶ÔÓ¦£¬´æ´¢µÄÃ¿¸öÃèÊöÂëÊÇ¸ù¾ÝÓÃ»§µÄ¿Í»§¶ËÉ…	°²È«
Ò»ÖÖÈ¨ÏÞ¿ªÍ¨·½·¨	½­Î÷²©ÈðÍ®Ü¿¿Æ¼¼ÓÐÏÞ¹«Ë¾	2017-06-30	2017-10-24	CN107294984A	Ö÷·ÖÀàºÅ£ºH04L29/06(2006.01)I	ÔÚÉó-ÊµÖÊÉó²éµÄÉúÐ§	330000 ½­Î÷Ê¡ÄÏ²ýÊÐÁÙ¿Õ¾­¼ÃÇøÈåÀÖºþ´ó½Ö399ºÅ	±¾·¢Ã÷ÊµÊ©ÀýÉæ¼°Ò»ÖÖÈ¨ÏÞ¿ªÍ¨·½·¨£¬°üÀ¨£º·þÎñÆ÷½ÓÊÕµÚÒ»ÒÆ¶¯ÖÕ¶Ë·¢ËÍµÄÈ¨ÏÞ¿ªÍ¨ÇëÇó£»·þÎñÆ÷Éú³ÉÖ§¸¶ÐÅÏ¢£¬·¢ËÍ¸øµÚÒ»ÒÆ¶¯ÖÕ¶Ë£»µÚÒ»ÒÆ¶¯ÖÕ¶Ë½ÓÊÕÓÃ»§ÊäÈëµÄÖ§¸¶Ö¸Áî£¬·¢ËÍ¸ø·þÎñÆ÷£»·þÎñÆ÷½¨Á¢Ê±¼äÈ¨ÏÞºÍµÚÒ»ÖÕ¶ËºÅÂëÖ®¼äµÄ¹ØÁª¹ØÏµ£¬²¢ÇÒÉú³ÉµÚÒ»¼ÇÂ¼×´Ì¬£»µÚÒ»ÒÆ¶¯ÖÕ¶Ë½ÓÊÕÓÃ»§ÔÚÐÅÏ¢ÊäÈëÇøÓòÊäÈëÏà¶ÔÓ¦µÄ×¢²áÐÅÏ¢£¬Éú³ÉÓÃ»§×¢²áÊý¾Ý£¬·¢ËÍ¸ø·þÎñÆ÷£»·þÎñÆ÷¶ÔÃ¿¸öÐÅÏ¢ÊäÈëÇøÓò½øÐÐ¼ìÑé£¬µ±Ã¿¸öÐÅÏ¢ÊäÈëÇøÓò¾ù¾ßÓÐÏò¶ÔÓ¦µÄ×¢²…	Ö§¸¶
¶ÌÐÅ´¦Àí·½·¨¡¢×°ÖÃ¡¢´æ´¢½éÖÊ¼°ÖÕ¶Ë	¹ã¶«Å·çêÒÆ¶¯Í¨ÐÅÓÐÏÞ¹«Ë¾	2017-06-30	2017-11-03	CN107315940A	Ö÷·ÖÀàºÅ£ºG06F21/32(2013.01)I	ÔÚÉó-ÊµÖÊÉó²éµÄÉúÐ§	523860 ¹ã¶«Ê¡¶«Ý¸ÊÐ³¤°²ÕòÎÚÉ³º£±õÂ·18ºÅ	±¾·¢Ã÷ÊµÊ©ÀýÌá¹©Ò»ÖÖ¶ÌÐÅ´¦Àí·½·¨¡¢×°ÖÃ¡¢´æ´¢½éÖÊ¼°ÖÕ¶Ë¡£¸Ã¶ÌÐÅ´¦Àí·½·¨£¬Ó¦ÓÃÓÚÖÕ¶ËÖÐ£¬ËùÊö·½·¨°üÀ¨ÒÔÏÂ²½Öè£ºËùÊöÖÕ¶Ë½ÓÊÕµ½¶ÌÐÅÊ±£¬²É¼¯ÓÃ»§µÄµÚÒ»ÓïÒôÐÅºÅ£»¸ù¾ÝËùÊöµÚÒ»ÓïÒôÐÅºÅµÄµÚÒ»ÌØÕ÷ÐÅÏ¢½øÐÐ¼øÈ¨´¦Àí£»µ±¼øÈ¨³É¹¦ºó£¬¸ù¾ÝËùÊöµÚÒ»ÓïÒôÐÅºÅµÄµÚ¶þÌØÕ÷ÐÅÏ¢Éú³É²Ù×÷Ö¸Áî£»¸ù¾ÝËùÊö²Ù×÷Ö¸Áî¶ÔËùÊö¶ÌÐÅ½øÐÐ²Ù×÷´¦Àí¡£±¾·¢Ã÷¿ÉÒÔÌá¸ßÖÕ¶Ë¶ÌÐÅ´¦ÀíµÄ±ãÀûÐÔ¡£	Ö§¸¶
°²È«Æô¶¯·À»¤·½·¨¡¢×°ÖÃ¼°¼ÆËã»ú¿É¶Á´æ´¢½éÖÊ	ÉîÛÚÊÐº£ÁÚ¿ÆÐÅÏ¢¼¼ÊõÓÐÏÞ¹«Ë¾	2017-07-03	2017-09-22	CN107197075A	Ö÷·ÖÀàºÅ£ºH04M1/67(2006.01)I	ÔÚÉó-ÊµÖÊÉó²éµÄÉúÐ§	518048 ¹ã¶«Ê¡ÉîÛÚÊÐÄÏÉ½ÇøÎ÷Àö½ÖµÀ¿Æ¼¼±±¶þÂ·15ºÅ½à¾»Ñô¹âÔ°°ì¹«Â¥4Â¥	±¾·¢Ã÷¹«¿ªÁËÒ»ÖÖ°²È«Æô¶¯·À»¤·½·¨£¬°üÀ¨£ºÔÚÖÕ¶Ë°²È«ÏµÍ³µÇÂ¼³É¹¦ºó£¬Í¨¹ýÔ¤Éè²É¼¯·½Ê½²É¼¯ËùÊöÖÕ¶ËµÄÌØÕ÷²ÎÊý£»½ÓÊÕ»ùÓÚµÇÂ¼³É¹¦ºó´¥·¢µÄÍøÂç²¦ºÅÖ¸Áî£¬½«ÒÑ±£´æµÄËùÊöÌØÕ÷²ÎÊý·¢ËÍÖÁÔ¤ÉèÊý¾Ý¿â£¬ÒÔ½øÐÐËùÊöÌØÕ÷²ÎÊýµÄÆ¥Åä£»ÔÚÈ·ÈÏËùÊöÔ¤ÉèÊý¾Ý¿â´æ´¢ÓÐÓëËùÊöÌØÕ÷²ÎÊýÆ¥Åä³É¹¦µÄÖÕ¶ËÌØÕ÷ÐÅÏ¢ºó£¬·µ»Ø²¦ºÅ³É¹¦ÌáÊ¾ÐÅÏ¢¡£±¾·¢Ã÷»¹¹«¿ªÁËÒ»ÖÖ°²È«Æô¶¯·À»¤×°ÖÃ¡¢¼ÆËã¿É¶Á´æ´¢½éÖÊ¡£±¾·¢Ã÷Í¨¹ý½«ÌáÈ¡µÄÖÕ¶ËÌØÕ÷²ÎÊý±£´æÖÁBIOSÇøÓò£¬Ç…	°²È«
Ò»ÖÖÖ§¸¶±£»¤·½·¨¡¢ÒÆ¶¯ÖÕ¶ËºÍ¼ÆËã»ú¿É¶Á´æ´¢½éÖÊ	¹ã¶«Å·çêÒÆ¶¯Í¨ÐÅÓÐÏÞ¹«Ë¾	2017-07-04	2017-11-03	CN107316197A	Ö÷·ÖÀàºÅ£ºG06Q20/38(2012.01)I	ÔÚÉó-ÊµÖÊÉó²éµÄÉúÐ§	523860 ¹ã¶«Ê¡¶«Ý¸ÊÐ³¤°²ÕòÎÚÉ³º£±õÂ·18ºÅ	±¾·¢Ã÷ÊÊÓÃÓÚµç×Ó¼¼ÊõÁìÓò£¬Ìá¹©ÁËÒ»ÖÖÖ§¸¶±£»¤·½·¨¡¢ÒÆ¶¯ÖÕ¶ËºÍ¼ÆËã»ú¿É¶Á´æ´¢½éÖÊ£¬ËùÊö·½·¨°üÀ¨£ºÈô¼ì²âµ½ÓÃ»§Æô¶¯Ö§¸¶Ó¦ÓÃµÄ²Ù×÷£¬Ôò¼ì²âÒÆ¶¯ÖÕ¶ËÒÑ°²×°µÄÓ¦ÓÃÖÐÊÇ·ñ´æÔÚµÚÒ»ÀàÐÍÓ¦ÓÃ£¬ÆäÖÐ£¬ËùÊöµÚÒ»ÀàÐÍÓ¦ÓÃÎªÎ´ÔÚËùÊöÒÆ¶¯ÖÕ¶ËµÄ×ÀÃæÏÔÊ¾Í¼±êµÄÓ¦ÓÃ£»Èô´æÔÚËùÊöµÚÒ»ÀàÐÍÓ¦ÓÃ£¬Ôò¼ì²âËùÊöµÚÒ»ÀàÐÍÓ¦ÓÃµÄÀ´Ô´£»ÈôËùÊöÀ´Ô´Îª·ÇÔ¤ÉèÀ´Ô´£¬Ôò»ñÈ¡ËùÊöµÚÒ»ÀàÐÍÓ¦ÓÃµÄÈ¨ÏÞÐÅÏ¢£»ÈôËùÊöÈ¨ÏÞÐÅÏ¢ÓëÔ¤¶¨µÄÊÚÈ¨ÐÅÏ¢²»Æ¥Åä£¬Ôò½ûÖ¹ÓÃ»§½…	Ö§¸¶
Ò»ÖÖµç×ÓÉè±¸°²È«·ÀÓù·½·¨¼°×°ÖÃ	±±¾©Ææ°²ÐÅ¿Æ¼¼ÓÐÏÞ¹«Ë¾	2017-07-05	2017-12-12	CN107463812A	Ö÷·ÖÀàºÅ£ºG06F21/31(2013.01)I	ÔÚÉó-ÊµÖÊÉó²éµÄÉúÐ§	100015 ±±¾©ÊÐ³¯ÑôÇø¾ÆÏÉÇÅÂ·¼×10ºÅ3ºÅÂ¥15²ã17²ã1701-26	±¾·¢Ã÷ÊµÊ©Àý¹«¿ªÁËÒ»ÖÖµç×ÓÉè±¸°²È«·ÀÓù·½·¨¼°×°ÖÃ£¬·½·¨°üÀ¨£º»ñÈ¡µç×ÓÉè±¸Ê¹ÓÃ¹ý³ÌÖÐµÄÈô¸ÉÕÅÓÃ»§Í·Ïñ£»ÈôÅÐ¶Ï»ñÖªËùÊöÈô¸ÉÕÅÓÃ»§Í·Ïñ¾ùÎªµÚÒ»ÓÃ»§µÄÍ·Ïñ£¬Ôò½«ËùÊöµÚÒ»ÓÃ»§È·¶¨ÎªÄ¿±êÓÃ»§£»»ñÈ¡ËùÊöµç×ÓÉè±¸Ê¹ÓÃ¹ý³ÌÖÐµÚ¶þÓÃ»§µÄÍ·Ïñ£¬Èô¸ù¾ÝËùÊöµÚ¶þÓÃ»§µÄÍ·ÏñÅÐ¶Ï»ñÖªËùÊöµÚ¶þÓÃ»§²»ÊÇÄ¿±êÓÃ»§£¬ÔòÖ´ÐÐ°²È«·ÀÓù²Ù×÷¡£±¾·¢Ã÷ÊµÊ©ÀýÍ¨¹ý×Ô¶¯»ñÈ¡ÓÃ»§Í·ÏñÀ´È·¶¨Ä¿±êÓÃ»§£¬²¢Í¨¹ýÅÐ¶Ï»ñÈ¡µÄµÚ¶þÓÃ»§µÄÍ·Ïñ²»ÊÇÄ¿±êÓÃ»§µÄÓÃ»§Í·Ï…	°²È«
Ò»ÖÖPOS»úµÄ°²È«ÑéÖ¤·½·¨¼°ÖÕ¶Ë	ÉÏº£»ã¶ûÍ¨ÐÅÏ¢¼¼ÊõÓÐÏÞ¹«Ë¾	2017-07-07	2017-12-22	CN107506207A	Ö÷·ÖÀàºÅ£ºG06F9/445(2006.01)I	ÔÚÉó-ÊµÖÊÉó²éµÄÉúÐ§	200000 ÉÏº£ÊÐÇàÆÖÇø»ª·ÄÂ·99Åª99ºÅ³§ÇøÄÚµÚ5´±°Ë²ãAÇø849ÊÒ	±¾·¢Ã÷Éæ¼°Í¨ÐÅ¼¼ÊõÁìÓò£¬ÓÈÆäÉæ¼°Ò»ÖÖPOS»úµÄ°²È«ÑéÖ¤·½·¨¼°ÖÕ¶Ë£¬Æä·½·¨°üÀ¨£º²»Í¬Åú´ÎµÄPOS»ú°²×°²»Í¬µÄ²¹¶¡°ü£¬ËùÊö²¹¶¡°ü°üÀ¨±êÊ¶ÎÄ¼þ£»°²×°Óë±êÊ¶ÎÄ¼þ¶ÔÓ¦µÄ°²È«ÅäÖÃÎÄ¼þ£»ËùÊö°²È«ÅäÖÃÎÄ¼þÖÐ°üÀ¨¸ùÖ¤Êé£»ÔÚ°²×°Ó¦ÓÃ³ÌÐòÊ±£¬Í¨¹ýPOS»úÏµÍ³µÄÑéÇ©Ä£¿é»ñÈ¡ÓÃ»§µÄÇ©ÃûÐÅÏ¢£»ÅÐ¶ÏËùÊöÇ©ÃûÐÅÏ¢ÓëËùÊö¸ùÖ¤ÊéµÄÄÚÈÝÊÇ·ñÆ¥Åä£¬ÈôÆ¥Åä³É¹¦£¬Ôò½ÓÊÜËùÊöÓ¦ÓÃ³ÌÐòµÄ°²×°£¬·ñÔò¾Ü¾øËùÊöÓ¦ÓÃ³ÌÐòµÄ°²×°¡£±¾·¢Ã÷Ìá¸ßÁË²»Í¬Åú´ÎµÄPOS»úµÄ¸ùÖ…	°²È«
Ò»ÖÖATM¹ñÔ±»ú	º¼ÖÝÁ¦Æ×¿Æ¼¼ÓÐÏÞ¹«Ë¾	2017-07-09	2017-10-24	CN107293072A	Ö÷·ÖÀàºÅ£ºG07F19/00(2006.01)I	ÔÚÉó-ÊµÖÊÉó²éµÄÉúÐ§	310051 Õã½­Ê¡º¼ÖÝÊÐ±õ½­ÇøÎ÷ÐË½ÖµÀ¾Û¹¤Â·11ºÅ5´±1²ã-10	±¾·¢Ã÷¹«¿ªÁËÒ»ÖÖATM¹ñÔ±»ú£¬°üÀ¨ÓÐ»ú¹ñ£¬ËùÊö»ú¹ñÇ°²àÉÏ²¿°²×°ÓÐÏÔÊ¾ÆÁ£¬ËùÊö»ú¹ñÇ°²àÎ»ÓÚÏÔÊ¾ÆÁÏÂ·½³ÉÐÍÓÐÏò»ú¹ñºó·½°¼ÏÝµÄ°²×°²¿£»ËùÊö°²×°²¿ÏÂ¶Ë°²×°ÓÐÊäÈë¼üÅÌ£¬ËùÊö°²×°²¿×ó²àÉèÓÐ³ö³®²¿£¬ËùÊö°²×°²¿ÓÒ²àÉèÓÐ¶Á¿¨²¿£¬ËùÊöÏÔÊ¾ÆÁ¡¢ÊäÈë¼üÅÌ¡¢¶Á¿¨²¿¼°³ö³®²¿·Ö±ðÓë°²×°ÔÚ»ú¹ñÄÚµÄ¿ØÖÆµçÂ·°åµçÁ¬½Ó£»ËùÊö°²×°²¿ÄÚÎ»ÓÚ¶Á¿¨²¿µÄÏÂ·½Î»ÖÃ°²×°ÓÐÓÃÒÔÊäÈëÖ¸ÎÆÃÜÂëÐòÁÐµÄÖ¸ÎÆÃÜÂëÊäÈë²¿¡£Ê¹ÓÃ±¾·¢Ã÷µÄATM»úÍ¨¹ýÖ¸ÎÆÃÜÂëÊäÈë²¿ÓÃÒÔÊäÈ…	°²È«
Ò»ÖÖ»ùÓÚÄÔ²¨µÄ×Ô¶¯´æÈ¡¿îÏµÍ³	ÈýÏ¿´óÑ§	2017-07-10	2017-11-24	CN107393214A	Ö÷·ÖÀàºÅ£ºG07F19/00(2006.01)I	ÔÚÉó-ÊµÖÊÉó²éµÄÉúÐ§	443002 ºþ±±Ê¡ÒË²ýÊÐ´óÑ§Â·8ºÅ	Ò»ÖÖ»ùÓÚÄÔ²¨µÄ×Ô¶¯´æÈ¡¿îÏµÍ³£¬°üÀ¨×ÔÖú´æÈ¡¿î»ú£¬ËùÊö×ÔÖú´æÈ¡¿î»úÍ¨¹ýÊý¾ÝÍøÂçÓë·Ö²¼Ê½Êý¾Ý¿âÁ¬½Ó£»ËùÊö×ÔÖú´æÈ¡¿î»ú°üÀ¨ÄÔ²¨ÒÇ¡¢ÉãÏñ»ú¡¢´æÈ¡Ç®»ú¡¢ÏÖ½ðÏä¼°¿Í»§I/OÉè±¸£»ËùÊö·Ö²¼Ê½Êý¾Ý¿â°üÀ¨ÄÔ²¨Êý¾ÝÖÐÐÄ¡¢¼à¿ØÖÐÐÄ¼°ÒøÐÐÊý¾ÝÖÐÐÄ£»ËùÊöÄÔ²¨ÒÇ¶ÁÈ¡¿Í»§µÄÄÔ²¨£¬Í¨¹ýÄÔ²¨Êý¾ÝÖÐÐÄÍê³É¶ÔÄÔ²¨µÄ¶Ô±ÈÊ¶±ð£»Í¨¹ýÊý¾ÝÍøÂçÁ¬½Ó×ÔÖú´æÈ¡¿î»úÓë¼à¿ØÖÐÐÄ¼°ÒøÐÐÊý¾ÝÖÐÐÄ£¬Íê³É×ÔÖú´æÈ¡¿îÒµÎñ¡£±¾·¢Ã÷Ìá¹©Ò»ÖÖ»ùÓÚÄÔ²¨µÄ×Ô¶¯´æÈ¡¿îÏµÍ³£¬…	°²È«
Ó¦ÓÃÏÂÔØ·½·¨¡¢×°ÖÃ¼°ÖÕ¶ËÉè±¸	¹ã¶«Å·çêÒÆ¶¯Í¨ÐÅÓÐÏÞ¹«Ë¾	2017-07-14	2017-10-24	CN107292162A	Ö÷·ÖÀàºÅ£ºG06F21/51(2013.01)I	ÔÚÉó-ÊµÖÊÉó²éµÄÉúÐ§	523860 ¹ã¶«Ê¡¶«Ý¸ÊÐ³¤°²ÕòÎÚÉ³º£±õÂ·18ºÅ	±¾·¢Ã÷ÊÊÓÃÓÚÓ¦ÓÃÏÂÔØ¼¼ÊõÁìÓò£¬Ìá¹©ÁËÓ¦ÓÃÏÂÔØ·½·¨¡¢×°ÖÃ¼°ÖÕ¶ËÉè±¸£¬°üÀ¨£º½ÓÊÕÓ¦ÓÃÏÂÔØÖ¸Áî£¬ËùÊöÓ¦ÓÃÏÂÔØÖ¸ÁîÐ¯´øÓ¦ÓÃµÄÎ¨Ò»±êÊ¶£»¸ù¾ÝËùÊöÓ¦ÓÃµÄÎ¨Ò»±êÊ¶ÅÐ¶ÏËùÊöÓ¦ÓÃÊÇ·ñÎªÖ§¸¶ÀàÓ¦ÓÃ£»ÔÚËùÊöÓ¦ÓÃÎªÖ§¸¶ÀàÓ¦ÓÃÊ±£¬µ÷ÓÃÔ¤ÉèµÄ´¦ÀíÆ÷µÄÐ¾Æ¬·â×°½Ó¿Ú£»¸ù¾ÝËùÊöÔ¤ÉèµÄÐ¾Æ¬·â×°½Ó¿ÚµÄ²ÎÊýÉèÖÃÐÅÏ¢¿ØÖÆËùÊöÖ§¸¶ÀàÓ¦ÓÃµÄÏÂÔØ£¬ËùÊö²ÎÊýÉèÖÃÐÅÏ¢°üÀ¨¶ÔËùÊöÖ§¸¶ÀàÓ¦ÓÃµÄ·þÎñÆ÷µÄµØÖ·µÄ°²È«¹Ü¿ØÐÅÏ¢¡£Í¨¹ýÉÏÊö·½·¨£¬ÄÜ¹»¼«´ó½µµÍÏÂÔØµ…	°²È«
Ò»ÖÖÖ§¸¶·½·¨¼°ÖÕ¶Ë	ÉîÛÚÊÐ½ðÁ¢Í¨ÐÅÉè±¸ÓÐÏÞ¹«Ë¾	2017-07-17	2017-12-15	CN107480996A	Ö÷·ÖÀàºÅ£ºG06Q20/40(2012.01)I	ÔÚÉó-ÊµÖÊÉó²éµÄÉúÐ§	518040 ¹ã¶«Ê¡ÉîÛÚÊÐ¸£ÌïÇøÉîÄÏ´óµÀ7028ºÅÊ±´ú¿Æ¼¼´óÏÃ¶«×ù21Â¥	±¾·¢Ã÷ÊµÊ©Àý¹«¿ªÁËÒ»ÖÖÖ§¸¶·½·¨¼°ÖÕ¶Ë£¬ÆäÖÐ·½·¨°üÀ¨£ºÍ¨¹ýÖ¸ÎÆ½âËøÄ£¿é²É¼¯Ä¿±êÖ¸ÎÆÐÅÏ¢£»ÔÚÈ·¶¨ËùÊöÄ¿±êÖ¸ÎÆÐÅÏ¢ÓëÔ¤´æµÄÖ¸ÎÆÐÅÏ¢ÏàÆ¥Åäºó£¬»ñÈ¡Ö§¸¶ÇëÇó£»ÒÀ¾ÝËùÊöÖ§¸¶ÇëÇó½øÐÐÖ§¸¶¡£±¾·¢Ã÷ÊµÊ©ÀýÔÚ»ñÈ¡Ö§¸¶ÇëÇóÖ®Ç°ÐèÒªÑéÖ¤µ±Ç°²É¼¯µ½µÄÖ¸ÎÆÐÅÏ¢£¬ÔÚÑéÖ¤Í¨¹ýºó£¬»ñÈ¡Ö§¸¶ÇëÇó£»¿ÉÒÔÌá¸ßÖ§¸¶µÄ°²È«ÐÔºÍ±ã½ÝÐÔ¡£	°²È«
Ò»ÖÖ½ðÈÚ½»Ò×Êý¾Ý°²È«¹ÜÀíÏµÍ³	ÄÏÑôÊ¦·¶Ñ§Ôº	2017-07-19	2017-12-01	CN107423607A	Ö÷·ÖÀàºÅ£ºG06F21/32(2013.01)I	ÔÚÉó-ÊµÖÊÉó²éµÄÉúÐ§	473061 ºÓÄÏÊ¡ÄÏÑôÊÐÎÔÁúÇøÎÔÁúÂ·1638ºÅ	±¾·¢Ã÷¹«¿ªÁËÒ»ÖÖ½ðÈÚ½»Ò×Êý¾Ý°²È«¹ÜÀíÏµÍ³£¬°üÀ¨×¢²áÄ£¿é¡¢ÈË»ú½»»¥Ä£¿é¡¢Ä¿±êÊý¾Ý²É¼¯Ä£¿é¡¢Êý¾Ý¼ÇÂ¼ÌáÈ¡Ä£¿é¡¢Êý¾Ý±ê¼ÇÄ£¿é¡¢Êý¾ÝÕûÀíÄ£¿é¡¢Êý¾Ý¶¨Î»Ä£¿é¡¢Êý¾Ý¼ÓÃÜÄ£¿é¡¢Éí·ÝÈÏÖ¤Ä£¿é¡¢Êý¾Ý¼ìË÷µ÷ÓÃÄ£¿é£¬°²È«´¢´æ¿Õ¼äÓë¼ÓÃÜÄ£¿éÖ®¼ä¡¢Ä¿±êÊý¾Ý²É¼¯Ä£¿éÓë¼ÓÃÜÄ£¿é·Ö±ðÍ¨¹ýÏà»¥¶ÀÁ¢µÄË«Í¨µÀÁ¬½Ó£¬ÔÚÈÎÒâÒ»¸öÍ¨µÀ½øÐÐÍ¨Ñ¶Ê±£¬ÁíÒ»¸ö±¸ÓÃÍ¨µÀ½øÐÐÃÜÔ¿¸üÐÂ¡£±¾·¢Ã÷ÏµÍ³×Ô´øµÄ½ðÈÚ½»Ò×Êý¾Ý´¦Àí¹¦ÄÜ£¬Íê³É½ðÈÚ½»Ò×Êý¾ÝµÄ´¦ÀíºÍÉóºË£…	°²È«
Êý×Ö°´¼üÊäÈëµÄ´¦Àí·½·¨¡¢×°ÖÃ¼°ÖÕ¶Ë	±±¾©Ð¡Ã×ÒÆ¶¯Èí¼þÓÐÏÞ¹«Ë¾	2017-07-19	2017-10-17	CN107257416A	Ö÷·ÖÀàºÅ£ºH04M1/725(2006.01)I	ÔÚÉó-ÊµÖÊÉó²éµÄÉúÐ§	100085 ±±¾©ÊÐº£µíÇøÇåºÓÖÐ½Ö68ºÅ»ªÈóÎå²Ê³Ç¹ºÎïÖÐÐÄ¶þÆÚ9²ã01·¿¼ä	±¾¹«¿ªÊÇ¹ØÓÚÒ»ÖÖÊý×Ö°´¼üÊäÈëµÄ´¦Àí·½·¨¡¢×°ÖÃ¼°ÖÕ¶Ë£¬ÆäÖÐ£¬¸Ã·½·¨°üÀ¨£º¼ì²âÕë¶ÔÊý×Ö°´¼üµÄÊäÈë²Ù×÷£»ÏìÓ¦ÓÚ¼ì²âµ½ÊäÈë²Ù×÷£¬Ëæ»ú»ñÈ¡µÚÒ»°´¼üÒô£»Êä³öµÚÒ»°´¼üÒô¡£´Ó¶øÔÚÓÃ»§²Ù×÷ÖÐµÄÊý×Ö°´¼ü£¬È¥ÏòÖÕ¶ËÖÐÊäÈëÊý×ÖµÄÊ±ºò£¬ÖÕ¶ËËæ»úµÄÎªÓÃ»§ÊäÈëµÄÊý×Ö°´¼ü·ÖÅä°´¼üÒô£»Ëæ×ÅÓÃ»§ÏòÖÕ¶ËÖÐ²»¶ÏµÄÊäÈëÊý×Ö°´¼ü£¬ÖÕ¶Ë½«Ëæ»úÈ·¶¨³öµÄÃ¿Ò»¸öÊý×Ö°´¼üµÄ°´¼üÒô½øÐÐ²¥·Å¡£±ÜÃâ²»·¨·Ö×ÓÀûÓÃDTMF¹æ·¶·´ÏòµÄ¼ÆËã³öÓëDTMFÒô¶ÔÓ¦µÄÊý×ÖÊÇ¶àÉÙ£…	°²È«
Ò»ÖÖÐÅÏ¢·¢ËÍ·½·¨¡¢ÐÅÏ¢ÏÔÊ¾·½·¨¼°ÒÆ¶¯ÖÕ¶Ë	Î¬ÎÖÒÆ¶¯Í¨ÐÅÓÐÏÞ¹«Ë¾	2017-07-19	2017-09-19	CN107181852A	Ö÷·ÖÀàºÅ£ºH04M1/67(2006.01)I	ÔÚÉó-ÊµÖÊÉó²éµÄÉúÐ§	523860 ¹ã¶«Ê¡¶«Ý¸ÊÐ³¤°²ÕòÎÚÉ³²½²½¸ß´óµÀ283ºÅ	±¾·¢Ã÷Ìá¹©Ò»ÖÖÐÅÏ¢·¢ËÍ·½·¨¡¢ÐÅÏ¢ÏÔÊ¾·½·¨¼°ÒÆ¶¯ÖÕ¶Ë£¬¸ÃÐÅÏ¢ÏÔÊ¾·½·¨°üÀ¨£º½ÓÊÕµÚ¶þÒÆ¶¯ÖÕ¶Ë·¢ËÍµÄÄ¿±êÐÅÏ¢£¬ËùÊöÄ¿±êÐÅÏ¢°üÀ¨ÓÃÓÚ²é¿´ËùÊöÄ¿±êÐÅÏ¢µÄÑéÖ¤ÐÅÏ¢£»Èô½ÓÊÕµ½Éí·ÝÑéÖ¤Ö¸Áî£¬Ôò¿ªÆôÉãÏñÍ·²É¼¯Ä¿±êÍ¼Ïñ£»ÌáÈ¡ËùÊöÄ¿±êÍ¼ÏñÖÐµÄÌØÕ÷ÐÅÏ¢£»½«ËùÊöÌØÕ÷ÐÅÏ¢ÓëËùÊöÑéÖ¤ÐÅÏ¢½øÐÐ±È¶Ô£»ÈôËùÊöÌØÕ÷ÐÅÏ¢ÓëËùÊöÑéÖ¤ÐÅÏ¢ÏàÆ¥Åä£¬ÔòÏÔÊ¾ËùÊöÄ¿±êÐÅÏ¢µÄÐÅÏ¢ÄÚÈÝ¡£Í¨¹ý±¾·¢Ã÷Ìá¹©µÄÐÅÏ¢ÏÔÊ¾·½·¨£¬½«ÌáÈ¡µÄÌØÕ÷ÐÅÏ¢ÓëµÚ¶þÒÆ¶¯ÖÕ¶Ë·¢ËÍµ…	°²È«
Ò»ÖÖ»ùÓÚÖÕ¶ËÖÇÄÜ»¯Ç®°üµÄ¹ÜÀíÏµÍ³	ºÏ·ÊË³Ë³ÐÅÏ¢×ÉÑ¯ÓÐÏÞ¹«Ë¾	2017-07-20	2017-11-17	CN107348645A	Ö÷·ÖÀàºÅ£ºA45C1/02(2006.01)I	Ê§Ð§-·¢Ã÷×¨ÀûÉêÇë¹«²¼ºóµÄÊÓÎª³·»Ø	230000 °²»ÕÊ¡ºÏ·ÊÊÐ¾­¼Ã¼¼Êõ¿ª·¢ÇøÔÆÍâÂ·199ºÅÂÌ³Çôä´äºþÃµ¹åÔ°¸ß²ã¹«Ô¢11´±2104	±¾·¢Ã÷¹«¿ªÁËÒ»ÖÖ»ùÓÚÖÕ¶ËÖÇÄÜ»¯Ç®°üµÄ¹ÜÀíÏµÍ³¡£Éæ¼°ÖÕ¶Ë¹ÜÀíÏµÍ³¼¼ÊõÁìÓò£¬°üÀ¨Ç®°üÄ£¿é¡¢APP¡¢ÖÕ¶ËÉè±¸£¬APPÍ¨¹ýÍ¨ÐÅÄ£¿éÓëÖÕ¶ËÉè±¸½øÐÐÊý¾ÝµÄ´«Êä£»APP½«½âËøºÍÉÏËøÃüÁî´«Êä¸øÖ¸ÎÆ½âËø¼°ÃÜÂë½âËø×°ÖÃ£»APP½«¶¨Î»ÐÅÏ¢´«Êä¸ø¶¨Î»ÏµÍ³Ä£¿é£»¶¨Î»ÏµÍ³Ä£¿é½«Î»ÖÃÐÅÏ¢´«Êä¸øAPP£»APP½«È¡Ç®ÐÅÏ¢´«Êä¸øÏÖ½ðÄ£¿é£»APP½«È¡¿¨ÐÅÏ¢´«Êä¸øÖ¤¼þ¼°¿¨ÀàÄ£¿é£»±¾·¢Ã÷Í¨¹ýAPP¼¼ÊõÓëÇ®°üÄ£¿éµÄ½áºÏ£¬½â¾öÁËÈËÃÇÑ°ÕÒÇ®°üÄÑºÍÇ®°ü°²È«Ã»ÓÐ±£ÕÏµÄÎÊÌ…	°²È«
Ò»ÖÖÓ¦ÓÃ°²×°·½·¨¡¢ÒÆ¶¯ÖÕ¶ËºÍ¼ÆËã»ú¿É¶Á´æ´¢½éÖÊ	¹ã¶«Å·çêÒÆ¶¯Í¨ÐÅÓÐÏÞ¹«Ë¾	2017-07-21	2017-11-07	CN107330321A	Ö÷·ÖÀàºÅ£ºG06F21/51(2013.01)I	ÔÚÉó-ÊµÖÊÉó²éµÄÉúÐ§	523860 ¹ã¶«Ê¡¶«Ý¸ÊÐ³¤°²ÕòÎÚÉ³º£±õÂ·18ºÅ	±¾·¢Ã÷ÊÊÓÃÓÚµç×Ó¼¼ÊõÁìÓò£¬Ìá¹©ÁËÒ»ÖÖÓ¦ÓÃ°²×°·½·¨¡¢ÒÆ¶¯ÖÕ¶ËºÍ¼ÆËã»ú¿É¶Á´æ´¢½éÖÊ£¬·½·¨°üÀ¨£ºÈô¼ì²âµ½¶Ô´ý°²×°Ó¦ÓÃ½øÐÐ°²×°µÄ´¥·¢²Ù×÷Ê±£¬»ñÈ¡´ý°²×°Ó¦ÓÃµÄÇ©ÃûÐÅÏ¢£»¸ù¾ÝÇ©ÃûÐÅÏ¢È·¶¨´ý°²×°Ó¦ÓÃµÄÀàÐÍ£»Èô´ý°²×°Ó¦ÓÃµÄÀàÐÍÎªÔ¤¶¨ÀàµÄÓ¦ÓÃ£¬Ôò´ÓÇ©ÃûÐÅÏ¢ÖÐ»ñÈ¡´ý°²×°Ó¦ÓÃµÄµØÖ·ÐÅÏ¢£¬¸ù¾ÝµØÖ·ÐÅÏ¢È·¶¨´ý°²×°Ó¦ÓÃµÄÀ´Ô´ÐÅÏ¢£»¸ù¾ÝÀ´Ô´ÐÅÏ¢È·¶¨´ý°²×°Ó¦ÓÃÊÇ·ñÎªÔ¤ÉèÀ´Ô´Ó¦ÓÃ£»Èô´ý°²×°Ó¦ÓÃÎªÔ¤ÉèÀ´Ô´Ó¦ÓÃ£¬Ôò¶Ô´ý°²×°Ó¦ÓÃ½øÐÐ°²×…	°²È«
Ò»ÖÖÓ¦ÓÃ°²×°·½·¨¡¢ÒÆ¶¯ÖÕ¶ËºÍ¼ÆËã»ú¿É¶Á´æ´¢½éÖÊ	¹ã¶«Å·çêÒÆ¶¯Í¨ÐÅÓÐÏÞ¹«Ë¾	2017-07-24	2017-11-21	CN107368735A	Ö÷·ÖÀàºÅ£ºG06F21/51(2013.01)I	ÔÚÉó-ÊµÖÊÉó²éµÄÉúÐ§	523860 ¹ã¶«Ê¡¶«Ý¸ÊÐ³¤°²ÕòÎÚÉ³º£±õÂ·18ºÅ	±¾·¢Ã÷ÊÊÓÃÓÚµç×Ó¼¼ÊõÁìÓò£¬Ìá¹©ÁËÒ»ÖÖÓ¦ÓÃ°²×°·½·¨¡¢ÒÆ¶¯ÖÕ¶ËºÍ¼ÆËã»ú¿É¶Á´æ´¢½éÖÊ£¬·½·¨°üÀ¨£ºÈô¼ì²âµ½¶Ô´ý°²×°Ó¦ÓÃ½øÐÐ°²×°µÄ´¥·¢²Ù×÷Ê±£¬È·¶¨´ý°²×°Ó¦ÓÃÊÇ·ñÔÚÒÆ¶¯ÖÕ¶ËµÄ×ÀÃæÉÏÏÔÊ¾Í¼±ê£»Èô´ý°²×°Ó¦ÓÃ²»ÔÚÒÆ¶¯ÖÕ¶ËµÄ×ÀÃæÉÏÏÔÊ¾Í¼±ê£¬Ôò¼ì²âÒÆ¶¯ÖÕ¶ËÒÑ°²×°µÄÇÒÔÚ×ÀÃæÉÏÏÔÊ¾Í¼±êµÄÓ¦ÓÃÖÐÊÇ·ñ´æÔÚÓë´ý°²×°Ó¦ÓÃµÄÀàÐÍÏàÍ¬µÄÓ¦ÓÃ£»ÈôÒÑ°²×°µÄÇÒÔÚ×ÀÃæÉÏÏÔÊ¾Í¼±êµÄÓ¦ÓÃÖÐ´æÔÚÓë´ý°²×°Ó¦ÓÃµÄÀàÐÍÏàÍ¬µÄÓ¦ÓÃ£¬Ôò»ñÈ¡´ý°²×°Ó¦ÓÃµÄÀ´Ô´Ð…	°²È«
Æ¾Ö¤±êÊ¶Âë´¦Àí·½·¨¼°ÏµÍ³¡¢·þÎñÆ÷¼°´æ´¢½éÖÊ	ºþÄÏËÑÔÆÍøÂç¿Æ¼¼¹É·ÝÓÐÏÞ¹«Ë¾	2017-07-24	2017-12-15	CN107481140A	Ö÷·ÖÀàºÅ£ºG06Q40/04(2012.01)I	ÔÚÉó-ÊµÖÊÉó²éµÄÉúÐ§	410205 ºþÄÏÊ¡³¤É³ÊÐ¸ßÐÂ¿ª·¢Çø¼âÉ½Â·39ºÅÖÐµçÈí¼þÔ°×Ü²¿´óÂ¥12Â¥	±¾·¢Ã÷ÊµÊ©ÀýÌá¹©ÁËÒ»ÖÖÊý×Ö×Ê²úµÄÆ¾Ö¤±êÊ¶Âë´¦Àí·½·¨£¬Ó¦ÓÃÓÚÖÐÑë·þÎñÆ÷ÖÐ£¬°üÀ¨£º½ÓÊÕÊý×Ö×Ê²úµÄÆ¾Ö¤±êÊ¶ÂëµÄÉú³ÉÇëÇó£»»ñÈ¡ËùÊöÊý×Ö×Ê²úµÄ×Ê²ú±êÊ¶Âë¼°ËùÊöÊý×Ö×Ê²úËù¶ÔÓ¦ÓÃ»§µÄÓÃ»§±êÊ¶Âë£»ÀûÓÃÔ¤ÉèËã·¨¶ÔËùÊö×Ê²ú±êÊ¶Âë¼°ËùÊöÓÃ»§±êÊ¶Âë½øÐÐ»ìºÏ´¦Àí£¬Éú³ÉËùÊöÊý×Ö×Ê²úµÄÆ¾Ö¤±êÊ¶Âë¡£	Êý¾Ý·ÖÎö
´½ÓïÊ¶±ðµÄÉí·ÝÑéÖ¤·½·¨ºÍ×°ÖÃ	¹ã¶«Å·çêÒÆ¶¯Í¨ÐÅÓÐÏÞ¹«Ë¾	2017-07-31	2017-12-05	CN107437019A	Ö÷·ÖÀàºÅ£ºG06F21/32(2013.01)I	ÔÚÉó-ÊµÖÊÉó²éµÄÉúÐ§	523860 ¹ã¶«Ê¡¶«Ý¸ÊÐ³¤°²ÕòÎÚÉ³º£±õÂ·18ºÅ	±¾·¢Ã÷¹«¿ªÁËÒ»ÖÖ´½ÓïÊ¶±ðµÄÉí·ÝÑéÖ¤·½·¨ºÍ×°ÖÃ£¬ÆäÖÐ£¬·½·¨°üÀ¨£ºÏò½øÐÐ´½ÓïÊ¶±ðµÄÓÃ»§Ãæ²¿Í¶Éä½á¹¹¹â£¬²¢°´ÕÕÔ¤ÉèµÄ²É¼¯ÖÜÆÚÅÄÉã¶à¸ö¾­¹ýµ±Ç°ÓÃ»§Ãæ²¿µ÷ÖÆµÄ½á¹¹¹âÍ¼Ïñ£»½âµ÷¶à¸ö½á¹¹¹âÍ¼ÏñÖÐ´½²¿Î»ÖÃÏñËØ¶ÔÓ¦µÄÏàÎ»ÐÅÏ¢£¬»ñÈ¡¶à¸öÈýÎ¬´½²¿Í¼Ïñ£»´Ó¶à¸öÈýÎ¬´½²¿Í¼ÏñÖÐÌáÈ¡¶ÔÓ¦µÄ´½ÐÎÌØÕ÷ÐÅÏ¢£¬ÒÔ¼°¶à¸öÈýÎ¬´½²¿Í¼Ïñ¸ù¾ÝÊ±Ðò±ä»¯µÄ´½ÐÎ²îÒìÐÅÏ¢£»Ó¦ÓÃÔ¤ÉèµÄ´½ÓïÄ£ÐÍ¿âµÄÑù±¾ÌØÕ÷ÐÅÏ¢¶Ô´½ÐÎÌØÕ÷ÐÅÏ¢ÒÔ¼°´½ÐÎ²îÒìÐÅÏ¢½øÐÐÆ¥Åä£¬»ñÈ…	°²È«
ÐÅÓÃ¿¨×Ô¶¯°ìÀí»úµÄ¿ØÖÆÏµÍ³¼°ÆäÐÅÓÃ¿¨×Ô¶¯°ìÀí»ú	°²»ÕÖÐ½ÜÐÅÏ¢¿Æ¼¼ÓÐÏÞ¹«Ë¾	2017-07-31	2017-11-21	CN107369272A	Ö÷·ÖÀàºÅ£ºG07F17/42(2006.01)I	ÓÐÐ§-ÊµÖÊÉó²éµÄÉúÐ§	230088 °²»ÕÊ¡ºÏ·ÊÊÐ¸ßÐÂÇøÍû½­Î÷Â·800ºÅ´´ÐÂ²úÒµÔ°C3Â¥4²ãÖÐ¶«²¿	±¾·¢Ã÷¹«¿ªÁËÒ»ÖÖÐÅÓÃ¿¨×Ô¶¯°ìÀí»úµÄ¿ØÖÆÏµÍ³£¬°üÀ¨£º³õÉóÄ£¿é£¬ÓÃÓÚ¶ÔÉêÇëÈËÌá¹©×ÊÁÏµÄ¾ßÌåÊÂÏî½øÐÐ³õ²½ÉóºË£»ÐÅÏ¢±È¶ÔÑéÖ¤Ä£¿é£¬ÓÃÓÚ¸ù¾ÝÔÙ´ÎÂ¼ÈëµÄÐÅÏ¢ÓëÔ­Éí·ÝÐÅÏ¢¶ÔÉêÇëÈËµÄÉí·Ý½øÐÐÊ¶±ð£»ÃÜÂëÉèÖÃÄ£¿é£¬ÓÃÓÚÎªÐÅÓÃ¿¨¿¨Æ¬ÉèÖÃÃÜÂë£»ÖÆ¿¨³ö¿¨Éè±¸£¬ÓÃÓÚ¸ù¾ÝÉêÇëÈËÌá¹©ÐÅÏ¢ÒÔ¼°ÃÜÂëÖÆ×÷ÐÅÓÃ¿¨¿¨Æ¬ÒÔ¼°³ö¿¨£»ËùÊö³õÉóÄ£¿é»¹Í¨¹ýÐÅºÅÓëÒøÐÐÔ¶³ÌÖÕ¶ËÁ¬Í¨£¬ÇÒÒøÐÐÔ¶³ÌÖÕ¶ËÉÏÉèÖÃÓÐÈË¹¤ÊÜÀíÄ£¿é¡£±¾·¢Ã÷¿ÉÒÔÆÁ±Î²¿·Ö²»Âú×ãÐÅÓÃ¿¨ÉêÇ…	°²È«
Ö§¸¶Êý¾Ý´¦Àí·½·¨¡¢ÏµÍ³¡¢½»Ò××°ÖÃÓë·þÎñÆ÷	ËÕÖÝº£²©ÖÇÄÜÏµÍ³ÓÐÏÞ¹«Ë¾	2017-08-01	2018-02-13	CN107688937A	Ö÷·ÖÀàºÅ£ºG06Q20/36(2012.01)I	ÔÚÉó-×¨ÀûÉêÇëÈ¨¡¢×¨ÀûÈ¨µÄ×ªÒÆ	215200 ½­ËÕÊ¡ËÕÖÝÊÐÎâ½­ÊÐÎâ½­¾­¼Ã¿ª·¢ÇøÁªÑîÂ·ÒÔÄÏ¡¢³¤°²Â·ÒÔ¶«£¨¿Æ¼¼´´ÒµÔ°£©	±¾·¢Ã÷Ìá¹©ÁËÒ»ÖÖÖ§¸¶Êý¾Ý´¦Àí·½·¨¡¢ÏµÍ³¡¢½»Ò××°ÖÃÓë·þÎñÆ÷£¬ÆäÖÐ£¬½»Ò××°ÖÃµÄÖ§¸¶Êý¾Ý´¦Àí·½·¨£¬°üÀ¨£ºÑéÖ¤ËùÊäÈëµÄµÚÒ»Æ¾Ö¤Í¨¹ý£¬²úÉú¶¯Ì¬¿ÚÁî£»Ïò·þÎñÆ÷·¢ËÍËùÊö¶¯Ì¬¿ÚÁî£»½ÓÊÕÍ¨Ñ¶Éè±¸Éú³É²¢·¢ËÍµÄ½»Ò×±¨ÎÄ£»ÏÔÊ¾ËùÊö½»Ò×±¨ÎÄµÄ²¿·Ö»òÈ«²¿ÐÅÏ¢£»ÑéÖ¤ËùÊäÈëµÄµÚ¶þÆ¾Ö¤Í¨¹ý£¬ÏòËùÊö·þÎñÆ÷·¢ËÍ½»Ò×±¨ÎÄÇ©Ãû£¬ÒÔÊ¹µÃ£¬ËùÊö·þÎñÆ÷ÄÜ¹»Í¨¹ýÑéÖ¤ËùÊö½»Ò×±¨ÎÄÇ©ÃûÍ¨¹ýÈ·ÈÏ½»Ò×³É¹¦£»ÆäÖÐ£¬ËùÊö½»Ò×±¨ÎÄÇ©ÃûÎª¸ù¾ÝÓÃ»§µÄÈ·ÈÏ²Ù×÷ºÍËùÊ…	°²È«
Ò»ÖÖÓ¦ÓÃÓÚµç×ÓÉÌÎñµÄ¶©µ¥ÕË»§Ö§¸¶ÏµÍ³	½úÖÐÖ°Òµ¼¼ÊõÑ§Ôº	2017-08-07	2017-10-24	CN107292600A	Ö÷·ÖÀàºÅ£ºG06Q20/08(2012.01)I	ÔÚÉó-ÊµÖÊÉó²éµÄÉúÐ§	030600 É½Î÷Ê¡½úÖÐÊÐÓÜ´ÎÇøÔÌ»ªÎ÷½Ö229ºÅ	±¾·¢Ã÷¹«¿ªÁËÒ»ÖÖÓ¦ÓÃÓÚµç×ÓÉÌÎñµÄ¶©µ¥ÕË»§Ö§¸¶ÏµÍ³£¬°üÀ¨¶©µ¥Êý¾Ý²É¼¯Ä£¿é¡¢¿Í»§¶Ë¡¢·þÎñÆ÷¡¢¿â´æµ÷ÕûÄ£¿é¡¢¶©µ¥Êý¾ÝÓÐÐ§ÐÔÈ·ÈÏÄ£¿é¡¢½»Ò×¶©µ¥´¦ÀíÄ£¿éºÍÊÕ¿îÖÕ¶Ë¡£±¾·¢Ã÷ÔÚ¶©µ¥Êý¾ÝµÄ´¦Àí¹ý³ÌÖÐÔö¼ÓÁËÔÚ¶©µ¥ÕË»§Ö§¸¶ÏµÍ³¶Ë¶ÔÓÃ»§ÐÅÏ¢¡¢¶©µ¥Êý¾Ý½øÐÐÑéÖ¤¼°´¢´æµÄ·þÎñÆ÷£¬ËùÓÐµÄ½»Ò×Êý¾Ý¾ù´øÓÐÓÃ»§Éí·ÝÐÅÏ¢£¬±ãÓÚºóÆÚµÄ×ÊÁÏ²éÑ¯ºÍÕûÀí£¬Í¬Ê±ÔöÇ¿ÁËµç×ÓÉÌÎñÆ½Ì¨¡¢¶©µ¥ÕË»§Ö§¸¶ÏµÍ³¡¢ÍøÒøÏµÍ³ÒÔ¼°ÓÃ»§ËÄ·½Ö®¼äµÄËÄ·½ÐÅÏ¢¹ØÁªÐÔ£¬Ìá¸…	Ö§¸¶
Ò»ÖÖÓ¦ÓÃÓÚ½ðÈÚ×ÔÖúÉè±¸µÄÈÕÖ¾Ãô¸ÐÐÅÏ¢´¦Àí·½·¨¼°ÏµÍ³	ÀË³±½ðÈÚÐÅÏ¢¼¼ÊõÓÐÏÞ¹«Ë¾	2017-08-09	2017-12-22	CN107506660A	Ö÷·ÖÀàºÅ£ºG06F21/62(2013.01)I	ÔÚÉó-ÊµÖÊÉó²éµÄÉúÐ§	215100 ½­ËÕÊ¡ËÕÖÝÊÐÎâÖÐ¿ª·¢ÇøÎâäÁ½­¹¤ÒµÔ°ÎâäÁÂ·818ºÅ	±¾·¢Ã÷½ÒÊ¾ÁËÒ»ÖÖÓ¦ÓÃÓÚ½ðÈÚ×ÔÖúÉè±¸µÄÈÕÖ¾Ãô¸ÐÐÅÏ¢´¦Àí·½·¨¼°ÏµÍ³£¬¸Ã·½·¨°üÀ¨ÒÔÏÂ²½Öè£ºÆô¶¯ÈÕÖ¾Ãô¸ÐÐÅÏ¢´¦ÀíÏµÍ³£»ÏµÍ³Æô¶¯ºó£¬¼ìË÷ÓÃ»§ÉèÖÃµÄ¼ÓÃÜ·½Ê½£»µ±½ðÈÚ×ÔÖúÉè±¸ÓÐ±¨ÎÄÍùÀ´»òÕßÓÐ¿Í»§Ê¹ÓÃÊ±¼ìË÷±¨ÎÄÄÚÈÝ£¬½«¿Í»§Ãô¸ÐÐÅÏ¢ÄÚÈÝ²éÕÒ³öÀ´£»¸ù¾ÝÅäÖÃÀ´È·¶¨¿Í»§Ãô¸ÐÐÅÏ¢ÊÇ·ñÐèÒª×ö¼ÓÃÜ´¦Àí£¬ÏµÍ³¶ÁÈ¡Ô¤ÉèÖÃµÄÅäÖÃÐÅÏ¢²¢ÖðÒ»±È¶Ô¸÷ÀàÐÅÏ¢ÊÇ·ñÐèÒª¼ÓÃÜ£»¶Ô¼ìË÷³öÐèÒª¼ÓÃÜµÄ¿Í»§Ãô¸ÐÐÅÏ¢½øÐÐ¼ÓÃÜ´¦Àí£»½«ÆÕÍ¨ÄÚÈÝ»òÕß¼ÓÃÜºóµÄ¿Í»…	°²È«
»ùÓÚÒøÐÐµ¼ÀÀÏµÍ³µÄÖÇÄÜ·þÎñ»úÆ÷ÈËÏµÍ³	Õã½­¹¤Òµ´óÑ§	2017-08-10	2018-01-09	CN107563886A	Ö÷·ÖÀàºÅ£ºG06Q40/02(2012.01)I	ÔÚÉó-ÊµÖÊÉó²éµÄÉúÐ§	310014 Õã½­Ê¡º¼ÖÝÊÐÏÂ³ÇÇø³±ÍõÂ·18ºÅÕã½­¹¤Òµ´óÑ§	Ò»ÖÖ»ùÓÚÒøÐÐµ¼ÀÀÏµÍ³µÄÖÇÄÜ·þÎñ»úÆ÷ÈËÏµÍ³£¬Ä£¿éÖ÷Òª»®·ÖÎªÊý¾Ý²É¼¯²ã¡¢Ëã·¨´¦Àí²ã¡¢Ö´ÐÐ¿ØÖÆ²ãÈý¸ö²¿·Ö£¬Êý¾Ý²É¼¯²ã°üÀ¨´«¸ÐÆ÷Ä£¿é£»Ëã·¨´¦Àí²ã°üÀ¨ÓïÒôÄ£¿é¡¢ÈËÁ³Ê¶±ðÄ£¿é¡¢±ÜÕÏÄ£¿é£»Ö´ÐÐ¿ØÖÆ²ã°üÀ¨µ×ÅÌÒÆ¶¯Ä£¿é¡¢Ç°¶ËÒµÎñÏµÍ³Ä£¿éµÈ¡£Èí¼þÏµÍ³²ÉÓÃÁËB/SÍ¨ÐÅ¼Ü¹¹£¬Ä£¿éÓëÄ£¿éÖ®¼ä»ùÓÚROSÏûÏ¢·¢²¼/¶©ÔÄÍ¨ÐÅ»úÖÆ£¬Êý¾Ý²É¼¯²ã²É¼¯´«¸ÐÆ÷ÐÅÏ¢£¬Êý¾Ý×÷ÎªÊäÈë´«¸øËã·¨´¦Àí²ã½øÐÐ´¦Àí£¬´¦ÀíÍêµÄÊä³ö´«¸øÖ´ÐÐ¿ØÖÆ²ãÈ¥´ïµ½¿ØÖÆµÄÐ§¹û£»…	Êý¾Ý·ÖÎö
ÌáÉýPOS½»Ò×°²È«µÄ·½·¨¼°ÏµÍ³	¸£½¨ÐÂ´óÂ½Ö§¸¶¼¼ÊõÓÐÏÞ¹«Ë¾	2017-08-14	2018-01-09	CN107563743A	Ö÷·ÖÀàºÅ£ºG06Q20/20(2012.01)I	ÓÐÐ§-¹«¿ª	350015 ¸£½¨Ê¡¸£ÖÝÊÐÂíÎ²ÇøÈå½­Î÷Â·1ºÅÐÂ´óÂ½¿Æ¼¼Ô°	±¾·¢Ã÷¹«¿ªÁËÒ»ÖÖÌáÉýPOS½»Ò×°²È«µÄ·½·¨¼°ÏµÍ³£¬ÆäÖÐ¼üÅÌ·þÎñ´ÓPOSÖÕ¶ËµÄÃÜÂë¼üÅÌÉÏ»ñµÃ³Ö¿¨ÈËÃÜÂë£¬²¢Éú³ÉÃ÷ÎÄPINBLOCK£»µ±°²È«·þÎñÉêÇëDBUSÏµÍ³×ÜÏß£¬²¢Á¬½Óµ½¼üÅÌ·þÎñµÄDBUSÏµÍ³×ÜÏßÉÏÊ±£¬´Ó¼üÅÌ·þÎñ»ñÈ¡ËùÊöÃ÷ÎÄPINBLOCK£¬²¢¼ÓÃÜÉú³ÉÃÜÎÄPINBLOCK£»×îºóÓÉÓ¦ÓÃ³ÌÐò·¢ËÍµ½ÊÕµ¥ÐÐºóÌ¨½øÐÐÐ£Ñé¡£Í¨¹ýÉÏÊö·½Ê½£¬Ó¦ÓÃ³ÌÐòÖ»ÄÜ»ñÈ¡µ½ÃÜÎÄPINBLOCK£¬¶øÎÞ·¨»ñµÃÃ÷ÎÄPINBLOCK£¬´Ó¶øÓÐÐ§µØÌá¸ßÁË³Ö¿¨ÈËÃÜÂëµÄ°²È«ÐÔ¡£	°²È«
°²È«ÖÇÄÜPOS»ú¼°°²È«½»Ò×·½·¨	¶¦Ñ¶ÍøÂç°²È«¼¼ÊõÓÐÏÞ¹«Ë¾	2017-08-15	2017-10-20	CN107274185A	Ö÷·ÖÀàºÅ£ºG06Q20/38(2012.01)I	ÔÚÉó-ÊµÖÊÉó²éµÄÉúÐ§	250100 É½¶«Ê¡¼ÃÄÏÊÐÀú³ÇÇø¸ßÐÂÇø×ÛºÏ±£Ë°Çø¸ÛÐËÈýÂ·±±¶Î1¼ÃÄÏÒ©¹ÈÑÐ·¢Æ½Ì¨Çø1ºÅÂ¥B×ù330·¿¼ä	±¾·¢Ã÷µÄ°²È«ÖÇÄÜPOS»ú£¬°üÀ¨CPU¼°ÓëÆäÏàÁ¬½ÓµÄ´ÅÍ·¡¢ÉãÏñÍ·¡¢ÊäÈë°´¼ü¡¢ÏÔÊ¾ÆÁ¡¢´òÓ¡»úÇý¶¯Ä£¿éºÍ¹«¹²´æ´¢Æ÷£¬ÌØÕ÷ÔÚÓÚ£ºËùÊöCPUÁ¬½ÓÓÐ°²È«Ð¾Æ¬£¬°²È«Ð¾Æ¬ÓÉ¼ÓÃÜÄ£¿é¼°ÓëÆäÏàÁ¬½ÓµÄ½Ó¿ÚÄ£¿éºÍ°²È«´æ´¢Ä£¿é×é³É£¬°²È«´æ´¢Ä£¿éÓÃÓÚ´æ´¢Éí·ÝÐÅÏ¢ºÍ¹«Ë½Ô¿Êý¾Ý£¬¼Ó½âÃÜÄ£¿éÓÃÓÚ¹«Ë½Ô¿¶ÔµÄ¼Ó½âÃÜ²Ù×÷¡£±¾·¢Ã÷µÄ°²È«ÖÇÄÜPOS»ú¼°°²È«½»Ò×·½·¨£¬ÓÉÓÚÉèÖÃÁËÓëCPUÏàÁ¬½ÓµÄ°²È«Ð¾Æ¬£¬Ê¹ÆäÄÜ¹»Ìá¹©±ÈÈí¼ÓÃÜ¸ü¸ß¼¶±ð°²È«µÈ¼¶µÄ°²È«±£»¤£¬ÊµÏÖÁË…	°²È«
Ò»ÖÖ»ùÓÚ°²È«Ð¾Æ¬µÄ°²È«ÒÆ¶¯ÖÕ¶ËÏµÍ³¼°°²È«½»Ò×·½·¨	¶¦Ñ¶ÍøÂç°²È«¼¼ÊõÓÐÏÞ¹«Ë¾	2017-08-15	2017-11-07	CN107332671A	Ö÷·ÖÀàºÅ£ºH04L9/32(2006.01)I	ÔÚÉó-ÊµÖÊÉó²éµÄÉúÐ§	250100 É½¶«Ê¡¼ÃÄÏÊÐÀú³ÇÇø¸ßÐÂÇø×ÛºÏ±£Ë°Çø¸ÛÐËÈýÂ·±±¶Î1¼ÃÄÏÒ©¹ÈÑÐ·¢Æ½Ì¨Çø1ºÅÂ¥B×ù330·¿¼ä	±¾·¢Ã÷µÄ»ùÓÚ°²È«Ð¾Æ¬µÄ°²È«ÒÆ¶¯ÖÕ¶ËÏµÍ³¼°°²È«½»Ò×·½·¨£¬°üÀ¨CPU¡¢ÊäÈëÊä³öÉè±¸ºÍ¹«¹²´æ´¢Æ÷£¬ÌØÕ÷ÔÚÓÚ£ºËùÊöCPUÁ¬½ÓÓÐ°²È«Ð¾Æ¬£¬°²È«Ð¾Æ¬ÓÉ¼Ó½âÃÜÄ£¿é¡¢½Ó¿ÚÄ£¿éºÍ°²È«´æ´¢Ä£¿é×é³É£¬¼Ó½âÃÜÄ£¿éÍ¨¹ý½Ó¿ÚÄ£¿éÓëCPU½øÐÐÊÕ¾ÝÊÕ·¢£¬¼Ó½âÃÜÄ£¿éÓÃÓÚÖ´ÐÐ¼ÓÃÜºÍ½âÃÜ²Ù×÷£¬°²È«´æ´¢Ä£¿éÓÃÓÚ´æ´¢Éí·ÝÐÅÏ¢¡¢¹«Ë½Ô¿Êý¾Ý¡£±¾·¢Ã÷µÄ°²È«ÒÆ¶¯ÖÕ¶ËÏµÍ³£¬ÄÜ¹»Ìá¹©±ÈÈí¼ÓÃÜ¸ü¸ß¼¶±ð°²È«µÈ¼¶µÄ°²È«±£»¤£¬ÊµÏÖÁË´Óµ×²ã½â¾öÊÖ»ú°²È«ÎÊÌâ£»±¾·¢Ã÷µÄ°²…	°²È«
Ò»ÖÖÎ¥ÕÂ·ÑÓÃ½ÉÄÉ·½·¨¼°ATM»ú	ÉîÛÚâù»¯µçÄÔ¹É·ÝÓÐÏÞ¹«Ë¾	2017-08-21	2018-01-19	CN107610369A	Ö÷·ÖÀàºÅ£ºG07F19/00(2006.01)I	ÔÚÉó-ÊµÖÊÉó²éµÄÉúÐ§	518000 ¹ã¶«Ê¡ÉîÛÚÊÐÄÏÉ½Çøºóº£´óµÀ2388ºÅâù»¯½ðÈÚ¿Æ¼¼´óÏÃ26Â¥	±¾·¢Ã÷ÊÊÓÃÓÚÍ¨ÐÅ¼¼ÊõÁìÓò£¬Ìá¹©ÁËÒ»ÖÖÎ¥ÕÂ·ÑÓÃ½ÉÄÉ·½·¨¼°ATM»ú¡£¸Ã·½·¨Ó¦ÓÃÓÚATM»ú£¬°üÀ¨£ºÔÚ½ÓÊÕµ½ÓÃ»§ÊäÈëµÄÎ¥ÕÂ·ÑÓÃ½ÉÄÉÖ¸Áîºó£¬Ê¶±ðÓÃ»§ÔÚATM»úµÄÔ¤¶¨Î»ÖÃ·ÅÖÃµÄÉí·ÝÖ¤µÄÉí·ÝÐÅÏ¢£»»ñÈ¡ÓëÉí·ÝÐÅÏ¢Æ¥ÅäµÄÎ¥ÕÂÐÅÏ¢ºÍÖ¸ÎÆÐÅÏ¢£»ÓïÒôÌáÊ¾ÓÃ»§Â¼ÈëÖ¸ÎÆÐÅÏ¢£¬²É¼¯ÓÃ»§Â¼ÈëµÄÖ¸ÎÆÐÅÏ¢²¢ÅÐ¶ÏÓÃ»§Â¼ÈëµÄÖ¸ÎÆÐÅÏ¢ÊÇ·ñÓëÉí·ÝÐÅÏ¢Æ¥ÅäµÄÖ¸ÎÆÐÅÏ¢Ò»ÖÂ£»ÈôÒ»ÖÂÔòÏÔÊ¾Î¥ÕÂÐÅÏ¢£¬²¢ÌáÊ¾ÓÃ»§ÊÇ·ñÈ·ÈÏÎ¥ÕÂÐÅÏ¢£»Èô½ÓÊÕµ½ÓÃ»§µÄµÚÒ»È·ÈÏÖ¸Áî£¬Ôò…	Ö§¸¶
Ê¹½Ù³ÖÕß²»¸ÒÓÃÃÜÂëÈ¡¿îµÄ·½·¨	ÕÅµÂÕä	2017-08-22	2018-01-12	CN107578576A	Ö÷·ÖÀàºÅ£ºG07F19/00(2006.01)I	ÔÚÉó-ÊµÖÊÉó²éµÄÉúÐ§	314033 Õã½­Ê¡¼ÎÐËÊÐÄÏºþÇøÐÂ¼Î½ÖµÀºÌÐË±±Â·Î÷ÂíÇÅ47´±505ÊÒ	Ê¹½Ù³ÖÕß²»¸ÒÓÃÃÜÂëÈ¡¿îµÄ·½·¨£¬Ëü°üÀ¨Ò»¸öÒøÐÐÖ§¸¶ÊÕ¿î¹¤¾ß£¬ÔÚÖ§¸¶ÊÕ¿î¹¤¾ßµÄÃÜÂë¼üÅÌÉÏÉèÓÐÒ»¸ö·À½Ù³Ö½Óµã£¬´¢»§¿ÉÓÃËü½«Ò»¸öÒ×¼ÇµÄ£¬ÇÒ±ÈÃÜÂëÎ»ÊýµÍµÃ¶àµÄ¡°¼ÓÖµÊý¡±ÊäÈëµ½¡°¼ÓÖµÉè¶¨´æ´¢Æ÷¡±ÖÐ£¬Í¨¹ý¡°¼ÓÖµ¼ÆËãÆ÷¡±£¬µÃµ½ÓÉ¡°¼ÓÖµÊý¡±ºÍ¡°ÃÜÂëÊý¡±Ïà¼ÓµÄ¡°±¨¾¯ÃÜÂë¡±£¬ÓÉÓÚ´Ë±¨¾¯ÃÜÂëÒ»·½Ãæ¾ßÓÐÃÜÂë¹¦ÄÜ£¬ÁíÒ»·½Ãæ¾ßÓÐÏòÖ´·¨²¿ÃÅ±¨¾¯¹¦ÄÜ£¬Òò´Ë´¢»§Ôâ´õÍ½Íþ±ÆÊ±£¬¿ÉÒÔ½«±¨¾¯ÃÜÂë½»¸ø½ÙÔô£¬»ò×Ô¼ºÊ¹ÓÃ±¨¾¯ÃÜÂë½øÐÐ±¨¾¯£»´ËÖÖ±…	°²È«
Ò»ÖÖ³èÎï¹ÜÀíÏµÍ³¼°·½·¨	ÉÏº£¾£ºçµç×Ó¿Æ¼¼ÓÐÏÞ¹«Ë¾	2017-08-22	2019-03-05	CN109426708A	Ö÷·ÖÀàºÅ£ºG06F21/32(2013.01)I	ÓÐÐ§-ÊµÖÊÉó²éµÄÉúÐ§	201203 ÉÏº£ÊÐÆÖ¶«ÐÂÇø×ÔÓÉÃ³Ò×ÊÔÑéÇø·¼´ºÂ·400ºÅ1´±3²ã	±¾·¢Ã÷Ìá¹©Ò»ÖÖ³èÎï¹ÜÀíÏµÍ³¼°·½·¨£¬ËùÊöÏµÍ³°üÀ¨Í¨ÐÅÄ£¿é¡¢´æ´¢Ä£¿é¡¢¹ÜÀíÄ£¿éºÍÖ§¸¶Ä£¿é£¬ÆäÖÐ£ºÍ¨ÐÅÄ£¿é£¬ÓÃÓÚ»ñÈ¡´ýÊ¶±ð³èÎïµÄºçÄ¤ÐÅÏ¢£»´æ´¢Ä£¿é£¬ÓÃÓÚ´æ´¢ÀúÊ·³èÎïºçÄ¤ÐÅÏ¢£»¹ÜÀíÄ£¿é£¬ÓÃÓÚ½«´ýÊ¶±ð³èÎïµÄºçÄ¤ÐÅÏ¢ÓëÀúÊ·³èÎïºçÄ¤ÐÅÏ¢½øÐÐÆ¥Åä£¬µ±Æ¥Åä³É¹¦Ê±£¬¸ù¾ÝÊ¹ÓÃÈ¨ÏÞÏÔÊ¾ËùÊö´ýÊ¶±ð³èÎïµÄ¹ØÁªÐÅÏ¢±í£»Ö§¸¶Ä£¿é£¬ÓÃÓÚÏò´ýÊ¶±ð³èÎïÖ÷ÈË·¢ËÍÖ§¸¶ÇëÇó¡£±¾·¢Ã÷Ìá¹©µÄÒ»ÖÖ³èÎï¹ÜÀíÏµÍ³¼°·½·¨£¬ÄÜ¹»Í¬Ê±Âú×ã³èÎïÖ÷ÈË¡¢³èÎïÉÌ¼…	Ö§¸¶
Éí·ÝÂß¼­ÑéÖ¤·½·¨ºÍÖÕ¶Ë	ÉîÛÚË«´´¿Æ¼¼·¢Õ¹ÓÐÏÞ¹«Ë¾	2017-08-24	2018-01-19	CN107609361A	Ö÷·ÖÀàºÅ£ºG06F21/31(2013.01)I	ÔÚÉó-ÊµÖÊÉó²éµÄÉúÐ§	518000 ¹ã¶«Ê¡ÉîÛÚÊÐÄÏÉ½ÇøÎ÷Àö½ÖµÀÀÊÉ½Â·28ºÅÍ¨²úÐÂ²ÄÁÏ²úÒµÔ°×ÛºÏÂ¥°ì¹«Â¥Ò»Â¥	±¾·¢Ã÷Ìá¹©ÁËÒ»ÖÖÉí·ÝÑéÖ¤·½·¨£¬°üÀ¨£ºÅÐ¶ÏÓÃ»§µ±Ç°·ÃÎÊµÄÊÇ·ñÎªÊÜ±£»¤Êý¾Ý£»Èç¹ûËùÊöÓÃ»§µ±Ç°·ÃÎÊµÄÊÇÊÜ±£»¤Êý¾Ý£¬¸ù¾ÝÑéÖ¤Ëã·¨Éú³ÉÉí·ÝÑéÖ¤Âß¼­£»Èç¹ûËùÊöÓÃ»§Í¨¹ýËùÊöÉí·ÝÑéÖ¤Âß¼­µÄÑéÖ¤£¬ÔòÔÊÐíËùÊöÓÃ»§·ÃÎÊËùÊöÊÜ±£»¤Êý¾Ý£»Èç¹ûËùÊöÓÃ»§Ã»ÓÐÍ¨¹ýËùÊöÉí·ÝÑéÖ¤Âß¼­µÄÑéÖ¤£¬Ôò¾Ü¾øËùÊöÓÃ»§·ÃÎÊËùÊöÊÜ±£»¤Êý¾Ý¡£Ê¹ÓÃ±¾·¢Ã÷£¬ÄÜ¹»½µµÍÓÃ»§²Æ²úËðÊ§ºÍÒþË½Ð¹Â¶µÄ·çÏÕ¡£	°²È«
ÊÜ±£»¤Êý¾ÝµÄ·ÃÎÊ¿ØÖÆµÄÖÕ¶ËºÍÏà¹Ø²úÆ·	ÉîÛÚË«´´¿Æ¼¼·¢Õ¹ÓÐÏÞ¹«Ë¾	2017-08-24	2018-01-26	CN107633161A	Ö÷·ÖÀàºÅ£ºG06F21/31(2013.01)I	ÔÚÉó-ÊµÖÊÉó²éµÄÉúÐ§	518000 ¹ã¶«Ê¡ÉîÛÚÊÐÄÏÉ½ÇøÎ÷Àö½ÖµÀÀÊÉ½Â·28ºÅÍ¨²úÐÂ²ÄÁÏ²úÒµÔ°×ÛºÏÂ¥°ì¹«Â¥Ò»Â¥	±¾·¢Ã÷Ìá¹©ÁËÒ»ÖÖÖÕ¶Ë£¬°üÀ¨µÄ´¦ÀíÆ÷ÓÃÓÚ£ºÅÐ¶ÏÓÃ»§µ±Ç°·ÃÎÊµÄÊÇ·ñÎªÊÜ±£»¤Êý¾Ý£»Èç¹ûËùÊöÓÃ»§µ±Ç°·ÃÎÊµÄÊÇÊÜ±£»¤Êý¾Ý£¬¸ù¾ÝÑéÖ¤Ëã·¨Éú³ÉÉí·ÝÑéÖ¤Âß¼­£»Èç¹ûËùÊöÓÃ»§Í¨¹ýËùÊöÉí·ÝÑéÖ¤Âß¼­µÄÑéÖ¤£¬ÔòÔÊÐíËùÊöÓÃ»§·ÃÎÊËùÊöÊÜ±£»¤Êý¾Ý£»Èç¹ûËùÊöÓÃ»§Ã»ÓÐÍ¨¹ýËùÊöÉí·ÝÑéÖ¤Âß¼­µÄÑéÖ¤£¬Ôò¾Ü¾øËùÊöÓÃ»§·ÃÎÊËùÊöÊÜ±£»¤Êý¾Ý¡£Ê¹ÓÃ±¾·¢Ã÷£¬ÄÜ¹»½µµÍÓÃ»§²Æ²úËðÊ§ºÍÒþË½Ð¹Â¶µÄ·çÏÕ¡£	°²È«
Ò»ÖÖU¶Ü°²È«¹ÜÀíÏµÍ³	³É¶¼ºãÓîÍ¨¿Æ¼¼ÓÐÏÞ¹«Ë¾	2017-08-25	2017-11-17	CN107358086A	Ö÷·ÖÀàºÅ£ºG06F21/34(2013.01)I	ÔÚÉó-ÊµÖÊÉó²éµÄÉúÐ§	610094 ËÄ´¨Ê¡³É¶¼ÊÐ¸ßÐÂÇøÌì¸®Èý½Ö69ºÅ1¶°21²ã2107ºÅ	±¾·¢Ã÷¹«¿ªÁËÒ»ÖÖU¶Ü°²È«¹ÜÀíÏµÍ³£¬½â¾öÏÖÓÐ¼¼ÊõÖÐµ±U¶ÜÊýÁ¿¹ý¶à£¬U¶ÜÈÝÒ×ÒÅÊ§£¬ÈÝÒ×±»´íÄÃ£¬ÎÞ·¨¶Ô´íÄÃµÄÐÅÏ¢½øÐÐ¼à¿Ø£¬ÎÞ·¨¼°Ê±·¢ÏÖÒÅÊ§ºÍ´íÄÃµÄÐÅÏ¢£¬¶ÔU¶ÜËùÄÜÉæ¼°µ½µÄÊý¾ÝÒ²¾ÍÔì³ÉÁË½Ï´óµÄ·çÏÕµÄÎÊÌâ£¬ÊôÓÚU¶Ü°²È«¹ÜÀí¼¼ÊõÁìÓò¡£±¾·¢Ã÷°üÀ¨£ºÓÃ»§µ¥Ôª¡¢ÓëÓÃ»§µ¥ÔªÏàÁ¬½ÓµÄÉóÅúµ¥Ôª¡¢ÓëÉóÅúµ¥ÔªÏàÁ¬½ÓµÄU¶Ü´æ´¢µ¥ÔªºÍÓÃÓÚÓÃ»§µ¥Ôª¡¢ÉóÅúµ¥ÔªºÍU¶Ü´æ´¢µ¥ÔªÖ®¼äµÄÊý¾Ý´«ÊäµÄ·þÎñÆ÷¡£±¾·¢Ã÷ÓÃÓÚU¶ÜµÄ¹ÜÀí¡£	°²È«
ÖÕ¶Ë½âËø·½·¨¡¢ÖÕ¶ËºÍ¼ÆËã»ú¿É¶Á´æ´¢½éÖÊ	ÉîÛÚÌìççÎÞÏß¿Æ¼¼ÓÐÏÞ¹«Ë¾	2017-08-25	2018-01-19	CN107609390A	Ö÷·ÖÀàºÅ£ºG06F21/36(2013.01)I	ÔÚÉó-ÊµÖÊÉó²éµÄÉúÐ§	518000 ¹ã¶«Ê¡ÉîÛÚÊÐÄÏÉ½Çø»ªÇÈ³Ç¶«²¿¹¤ÒµÇøH3¶°501B	±¾·¢Ã÷¹«¿ªÁËÒ»ÖÖÖÕ¶Ë½âËø·½·¨£¬ËùÊöÖÕ¶Ë½âËø·½·¨°üÀ¨£ºÔÚÖÕ¶ËËøÆÁµÄÇé¿öÏÂ£¬Í¨¹ýÔ¤Éè°´¼üÆô¶¯ÖÕ¶ËÉãÏñÍ·²É¼¯Í¼Ïñ£»´Ó²É¼¯µÄÍ¼ÏñÖÐÌáÈ¡ÌØÕ÷ÐÅÏ¢£¬²¢½«ÌáÈ¡µÄÌØÕ÷ÐÅÏ¢ÓëÔ¤´æ½âËøÍ¼ÏñµÄÔ¤´æÌØÕ÷ÐÅÏ¢½øÐÐ±È½Ï£»ÔÚÌáÈ¡µÄÌØÕ÷ÐÅÏ¢ÓëÔ¤´æÌØÕ÷ÐÅÏ¢Æ¥ÅäÊ±£¬¶ÔËùÊöÖÕ¶Ë½øÐÐ½âËø¡£±¾·¢Ã÷»¹¹«¿ªÁËÒ»ÖÖÖÕ¶ËºÍ¼ÆËã»ú¿É¶Á´æ´¢½éÖÊ¡£±¾·¢Ã÷Ìá¸ßÁËÖÕ¶Ë½âËøµÄÄÑ¶È£¬Ê¹µÃÖÕ¶Ë½âËø¸ü¼Ó°²È«¡£	°²È«
Ò»ÖÖÆóÒµÌ¨ÕË¹ÜÀíÆ½Ì¨¼°Æä·½·¨	°²»ÕÌì¶÷ÐÅÏ¢¿Æ¼¼ÓÐÏÞ¹«Ë¾	2017-08-28	2017-12-29	CN107526976A	Ö÷·ÖÀàºÅ£ºG06F21/62(2013.01)I	Ê§Ð§-·¢Ã÷×¨ÀûÉêÇë¹«²¼ºóµÄ²µ»Ø	230088 °²»ÕÊ¡ºÏ·ÊÊÐ¸ßÐÂÇøÏã¸ñÀïÀ­¹ã³¡Ò»ÆÚÉÌÎñ¹«Ô¢323ÊÒ	±¾·¢Ã÷¹«¿ªÁËÒ»ÖÖÆóÒµÌ¨ÕË¹ÜÀíÆ½Ì¨¼°Æä·½·¨£¬°üÀ¨:¹ÜÀíÏµÍ³£¬ÓÃÓÚ¹ÜÀíÆóÒµ¹¤×÷ÐÅÏ¢£¬ÆäÉèÓÐÓÃ»§µÇÂ¼Ä£¿éÓÃÓÚÓÃ»§µÇÂ¼¹ÜÀíÆ½Ì¨£»ÐÅÏ¢¹ÜÀíÄ£¿éÓÃÓÚ´¦ÀíÆóÒµµÄºÏÍ¬Ì¨ÕËÐÅÏ¢£»²ÆÎñ´¦ÀíÄ£¿éÓÃÓÚ´¦ÀíºÏÍ¬µÄÏà¹Ø¿îÏî£»µÇ¼ÇÄ£¿é°üÀ¨·¢Æ±µÇ¼ÇÄ£¿éºÍµ¥¾ÝµÇ¼ÇÄ£¿é£¬ÓÃÓÚµÇ¼Ç·¢Æ±ºÍµ¥¾ÝµÄÐÅÏ¢¡£±¾·¢Ã÷¿ÉÒÔÈÃÓÃ»§½øÈë¹ÜÀíÆ½Ì¨£¬ÓÃ»§ÓÐ²»Í¬µÄÈ¨ÏÞ£¬¸ù¾ÝÈ¨ÏÞ½øÐÐ²»Í¬µÄ²Ù×÷¡£±¾·¢Ã÷¿É¶ÔÆóÒµºÏÍ¬Ì¨ÕË½øÐÐÊý×Ö»¯¡¢¿ÆÑ§µÄ¹ÜÀí£¬Çå³þµÄÕÆÎÕºÏÍ¬Ì¨ÕËµÄ…	Êý¾Ý·ÖÎö
Ò»ÖÖ½»Í¨ÊÂ¹ÊµÄ±£ÏÕÑéÖ¤·½·¨¼°Ïà¹Ø²úÆ·	ÎäººÁùµãÕû±±¶·¿Æ¼¼ÓÐÏÞ¹«Ë¾	2017-08-28	2018-01-23	CN107622448A	Ö÷·ÖÀàºÅ£ºG06Q40/08(2012.01)I	ÔÚÉó-ÊµÖÊÉó²éµÄÉúÐ§	430074 ºþ±±Ê¡ÎäººÊÐ¶«ºþÐÂ¼¼Êõ¿ª·¢Çø¹â¹È´óµÀ58ºÅ¹ØÄÏ¸£ÐÇÒ½Ò©Ô°¶þÆÚ2#Â¥¶°24²ã6ÊÒ	±¾·¢Ã÷Ìá¹©ÁËÒ»ÖÖ½»Í¨ÊÂ¹ÊµÄ±£ÏÕÑéÖ¤·½·¨¼°Ïà¹Ø²úÆ·£¬ËùÊö·½·¨°üÀ¨ÈçÏÂ²½Öè£º·þÎñÆ÷½ÓÊÕÖÕ¶Ë·¢ËÍµÄÀíÅâÇëÇó£»·þÎñÆ÷ÒÀ¾Ý¸ÃÀíÅâÇëÇóÈ·¶¨ÀíÅâµÄÀàÐÍ£¬ÈçÈ·¶¨¸ÃÀíÅâµÄÀàÐÍÎª100£¥ÀíÅâÀàÐÍ£¬·þÎñÆ÷ÌáÈ¡¸ÃÀíÅâÇëÇó¶ÔÓ¦µÄÀíÅâÇåµ¥£»·þÎñÆ÷´Ó¸ÃÖÕ¶Ë¼ÇÂ¼µÄ³µÔØÊÓÆµÖÐÌáÈ¡¸Ã½»Í¨ÊÂ¹ÊÊÓÆµ£¬ÒÀ¾Ý¸Ã½»Í¨ÊÂ¹ÊÊÓÆµ¶Ô¸ÃÀíÅâÇåµ¥µÄÏîÄ¿½øÐÐÑéÖ¤£¬ÈçÑéÖ¤Í¨¹ý£¬È·¶¨¸ÃÀíÅâÇåµ¥£¬½«¸ÃÀíÅâÇåµ¥·¢ËÍÖÁÖÕ¶Ë¡£±¾·¢Ã÷Ìá¹©µÄ¼¼Êõ·½°¸¾ßÓÐ±ÜÃâÆ­±£µÄÓÅµã¡£	±£ÏÕ
Ò»ÖÖÉí·ÝÊ¶±ðÏµÍ³¡¢·½·¨¼°Æä×°ÖÃ	ÉîÛÚâù»¯µçÄÔ¹É·ÝÓÐÏÞ¹«Ë¾	2017-08-29	2018-01-19	CN107609370A	Ö÷·ÖÀàºÅ£ºG06F21/32(2013.01)I	ÔÚÉó-ÊµÖÊÉó²éµÄÉúÐ§	518038 ¹ã¶«Ê¡ÉîÛÚÊÐÄÏÉ½Çøºóº£´óµÀ2388ºÅâù»¯½ðÈÚ¿Æ¼¼´óÏÃ26Â¥	±¾·¢Ã÷ÊµÊ©Àý¹«¿ªÁËÒ»ÖÖÉí·ÝÊ¶±ðÏµÍ³¡¢·½·¨¼°Æä×°ÖÃ£¬¸ÃÏµÍ³°üÀ¨£ººçÄ¤ÐÅÏ¢Ê¶±ðÄ£¿é¡¢ÖÐÑë¿ØÖÆÆ÷ÒÔ¼°ÏÔÊ¾Ä£¿é£¬ÆäÖÐ£¬ËùÊöºçÄ¤ÐÅÏ¢Ê¶±ðÄ£¿é£¬ÓÃÓÚ²É¼¯ÓÃ»§µÄÖÁÉÙÒ»¸ö´ýÊ¶±ðºçÄ¤ÐÅÏ¢£¬¸ù¾ÝËùÊö´ýÊ¶±ðºçÄ¤ÐÅÏ¢Ê¶±ðÓÃ»§Éí·Ý£¬²¢½«ºçÄ¤Ê¶±ð½á¹û·¢ËÍÖÁËùÊöÖÐÑë¿ØÖÆÆ÷£»ËùÊöÖÐÑë¿ØÖÆÆ÷£¬ÓÃÓÚÈç¹ûÔÚÔ¤¶¨ÏÞÊ±Ê±¼äÄÚ½ÓÊÕµ½ËùÊöºçÄ¤Ê¶±ð½á¹û£¬Ôò¸ù¾ÝËùÊöÊ¶±ð½á¹ûÒÔ¼°ÓÃ»§ºçÄ¤±ê×¼ÐÅÏ¢µÄÆ¥Åä½á¹ûËùÈ·¶¨µÄÏÔÊ¾½çÃæÌá¹©¸øËùÊöÓÃ»§£¬Èç¹ûÔÚÔ¤¶¨Ï…	°²È«
Ò»ÖÖ·ÀµÁÊÖ»úÖ§¸¶ÏµÍ³	Âí½¨É½	2017-08-29	2017-12-15	CN107480983A	Ö÷·ÖÀàºÅ£ºG06Q20/32(2012.01)I	ÓÐÐ§-ÊÚÈ¨	312369 Õã½­Ê¡ÉÜÐËÊÐÉÏÓÝÇø¸Ç±±ÕòÕò¶«´åÖÐÐÄÂ·66ºÅ	±¾·¢Ã÷¹«¿ªÁËÒ»ÖÖ·ÀµÁÊÖ»úÖ§¸¶ÏµÍ³£¬°üÀ¨£º»ñÈ¡ÊÖ»úÖ§¸¶ÇëÇó£¬ËùÊöÊÖ»úÖ§¸¶ÇëÇó°üÀ¨ÊÖ»úÐÅÏ¢ÒÔ¼°µ±Ç°ÊÖ»úºóÌ¨¿ªÆôµÄ³ÌÐòÃû³Æ£»¸ù¾ÝËùÊöÊÖ»úÐÅÏ¢ÏòºóÌ¨·þÎñÆ÷»ñÈ¡ÊÖ»úÓÃ»§Ô¤ÉèµÄºóÌ¨¿ªÆôµÄ³ÌÐòÃû³Æ£»¸ù¾ÝÔ¤ÉèµÄºóÌ¨¿ªÆôµÄ³ÌÐòÃû³Æ£¬µÃµ½·ÖÎö½á¹û£»ÅÐ¶Ïµ±Ç°ÊÖ»úºóÌ¨¿ªÆôµÄ³ÌÐòÃû³ÆÓëÔ¤ÉèµÄºóÌ¨¿ªÆôµÄ³ÌÐòÃû³ÆÊÇ·ñÏàÍ¬£¬ÈôÊÇ£¬ÔòÖ´ÐÐËùÊöÊÖ»úÖ§¸¶ÇëÇó£¬Èô·ñ£¬Ôò¾Ü¾øËùÊöÊÖ»úÖ§¸¶ÇëÇó¡£¸ÃÊÖ»úÖ§¸¶ÏµÍ³Ê¹µÃµÁÓÃÕß¸ù±¾ÎÞ·¨Íê³ÉÖ§¸¶£¬´Ó¶…	°²È«
°²È«ÊÖ»úÖ§¸¶ÏµÍ³	Âí½¨É½	2017-08-29	2017-12-15	CN107480982A	Ö÷·ÖÀàºÅ£ºG06Q20/32(2012.01)I	ÔÚÉó-ÊµÖÊÉó²éµÄÉúÐ§	312369 Õã½­Ê¡ÉÜÐËÊÐÉÏÓÝÇø¸Ç±±ÕòÕò¶«´åÖÐÐÄÂ·66ºÅ	±¾·¢Ã÷¹«¿ªÁË°²È«ÊÖ»úÖ§¸¶ÏµÍ³£¬°üÀ¨£º»ñÈ¡ÊÖ»úÖ§¸¶ÇëÇó£¬ËùÊöÊÖ»úÖ§¸¶ÇëÇó°üÀ¨ÊÖ»úÐÅÏ¢ÒÔ¼°µ±Ç°Ê±¼äÐÅÏ¢ÒÔ¼°Æ¥Åä¹æÔò£¬¸ù¾ÝËùÊöÊÖ»úÐÅÏ¢ÏòºóÌ¨·þÎñÆ÷»ñÈ¡ÊÖ»úÓÃ»§Ô¤ÉèµÄÊ±¼äÐÅÏ¢£»¸ù¾ÝÔ¤ÉèµÄÊ±¼äÐÅÏ¢ÓëÊÖ»úµ±Ç°Ê±¼ä½øÐÐ·ÖÎö£¬µÃµ½·ÖÎö½á¹û£»ÅÐ¶Ïµ±Ç°Ê±¼äÐÅÏ¢ÊÇ·ñÓëÔ¤ÉèµÄÊ±¼äÐÅÏ¢¸ù¾ÝËùÊöÆ¥Åä¹æÔòÊÇ·ñÆ¥Åä£¬ÈôÊÇ£¬ÔòÖ´ÐÐËùÊöÊÖ»úÖ§¸¶ÇëÇó£¬Èô·ñ£¬Ôò¾Ü¾øËùÊöÊÖ»úÖ§¸¶ÇëÇó¡£²ÉÓÃ¸ÃÏµÍ³ÄÜ¹»Éè¶¨½»Ò×µÄÊ±¼äÐÅÏ¢£¬¼´Ê¹ÊÖ»ú±»µÁ»òÒÅÊ§£…	°²È«
ÑéÖ¤·½·¨¡¢ÑéÖ¤ÏµÍ³¼°µç×ÓÉè±¸	ÉîÛÚÌìççÎÞÏß¿Æ¼¼ÓÐÏÞ¹«Ë¾	2017-08-30	2017-12-29	CN107528978A	Ö÷·ÖÀàºÅ£ºH04M1/725(2006.01)I	ÔÚÉó-ÊµÖÊÉó²éµÄÉúÐ§	518000 ¹ã¶«Ê¡ÉîÛÚÊÐÄÏÉ½Çø»ªÇÈ³Ç¶«²¿¹¤ÒµÔ°H3¶°501B	±¾·¢Ã÷ÊµÊ©ÀýÌá¹©Ò»ÖÖÑéÖ¤·½·¨¡¢ÑéÖ¤ÏµÍ³¼°µç×ÓÉè±¸£¬¸ÃÑéÖ¤·½·¨Ó¦ÓÃÓÚµç×ÓÉè±¸£¬°üÀ¨µ±½ÓÊÕµ½¹Ø»úÖ¸ÁîÊ±£¬·¢³öÊäÈëÓë¹Ø»úÖ¸ÁîÏà¹ØµÄÉúÎïÌØÕ÷Ê¶±ðÐÅÏ¢ÌáÊ¾£»µ±½ÓÊÕµ½Óë¹Ø»úÖ¸ÁîÏà¹ØµÄÉúÎïÌØÕ÷Ê¶±ðÐÅÏ¢Ê±£¬Ö´ÐÐ¹Ø»úÖ¸Áî¡£±¾·¢Ã÷ÊµÊ©ÀýÌá¹©µÄÑéÖ¤·½·¨Í¨¹ýµ±µç×ÓÉè±¸½ÓÊÕµ½¹Ø»úÖ¸ÁîÊ±£¬Éú³ÉÒªÇóÊäÈëÓÃÓÚÈ·ÈÏ¹Ø»úµÄÃÜÂëÑéÖ¤ÐÅÏ¢µÄÌáÊ¾£¬²¢ÇÒ£¬µ±µç×ÓÉè±¸½ÓÊÕµ½ÊäÈëµÄÃÜÂëÑéÖ¤ÐÅÏ¢£¬¶Ô¸ÃÃÜÂëÑéÖ¤ÐÅÏ¢½øÐÐÑéÖ¤£¬Èç¹ûÑéÖ¤Í¨¹ý£¬ÔòÖ´ÐÐ¹Ø»…	°²È«
»ùÓÚÈËÁ³Ê¶±ðµÄÒøÐÐ×ÔÖúÈ¡¿îÖÕ¶Ë¼°È¡¿î·½·¨	ÖØÇìÖÐ¿ÆÔÆ´Ô¿Æ¼¼ÓÐÏÞ¹«Ë¾	2017-08-30	2017-11-24	CN107393220A	Ö÷·ÖÀàºÅ£ºG07F19/00(2006.01)I	ÔÚÉó-ÊµÖÊÉó²éµÄÉúÐ§	401120 ÖØÇìÊÐÓå±±Çø½ð¿ª´óµÀÎ÷¶Î106ºÅ5´±5²ã	Ò»ÖÖ»ùÓÚÈËÁ³Ê¶±ðÈÏÖ¤µÄÒøÐÐ×ÔÖúÖÕ¶ËÈ¡ÏÖ·½·¨£¬¾ßÌå²½ÖèÎª£º²½ÖèÒ»£ºÊÕµ½Ë¢Á³È¡¿îÃüÁî£»²½Öè¶þ£º²É¼¯²Ù×÷ÕßÍ¼Ïñ²¢½øÐÐ»îÌå¼ì²â£¬Í¨¹ýÔò½øÈëÏÂÒ»²½£¬´íÎóÔò½áÊø£»²½ÖèÈý£º½«Í¼ÏñÊý¾ÝÉÏ´«µ½ÈËÁ³Ê¶±ðÏµÍ³£»²½ÖèËÄ£º²É¼¯Éí·ÝÖ¤¼þÐÅÏ¢£»²½ÖèÎå£ºµ÷È¡Éí·ÝÐÅÏ¢¶ÔÓ¦µÄÒøÐÐÔ¤´æÍ¼Ïñ£»²½ÖèÁù£º½«²Ù×÷ÕßÍ¼ÏñÐÅÏ¢ÓëÒøÐÐÔ¤´æÍ¼Ïñ½øÐÐ±È¶Ô£¬ÕýÈ·½øÈëÏÂÒ»²½£¬´íÎóÔò½áÊø£»²½ÖèÆß£º½øÈëÕý³£È¡¿îÁ÷³Ì¡£±¾·¢Ã÷ÓÃ»§È¡ÏÖÊ±£¬ÎÞÐèÐ¯´øÒøÐÐ¿¨½éÖÊ£¬ÔÚÓÃ»…	°²È«
Ò»ÖÖÉúÎïÌØÕ÷ÐÅÏ¢²É¼¯Óë´æ´¢µÄ×°ÖÃ	Ö£ÖÝÍ¬ÐÄ´´Ô¶ÉúÎï¿Æ¼¼ÓÐÏÞ¹«Ë¾	2017-08-31	2018-02-13	CN107688736A	Ö÷·ÖÀàºÅ£ºG06F21/32(2013.01)I	ÔÚÉó-¹«¿ª	450000 ºÓÄÏÊ¡Ö£ÖÝÊÐ¾­¼Ã¼¼Êõ¿ª·¢Çø	±¾·¢Ã÷¹«¿ªÁËÒ»ÖÖÉúÎïÌØÕ÷ÐÅÏ¢²É¼¯Óë´æ´¢µÄ×°ÖÃ£¬ËüÉæ¼°´«¸ÐÆ÷¼¼ÊõÁìÓò£»ËùÊö²É¼¯Ä£¿éÓëÊý¾Ý´«ÊäÓë×ª»»Ä£¿éµçÐÔÁ¬½Ó£¬ËùÊöÊý¾Ý´«ÊäÓë×ª»»Ä£¿éÓëÐÅºÅ´¦ÀíÄ£¿éµçÐÔÁ¬½Ó£¬ËùÊöÐÅºÅ´¦ÀíÄ£¿éÓëÎÞÏßÍ¨ÐÅÄ£¿éµçÐÔÁ¬½Ó£¬ËùÊöÎÞÏßÍ¨ÐÅÄ£¿éµÄ´æ´¢¶Ë·Ö±ðÓëÊý¾ÝÖÐÐÄ¡¢´æ´¢Æ÷µçÐÔÁ¬½Ó£¬ËùÊö´æ´¢Æ÷Óë¼ÓÃÜÄ£¿éµçÐÔÁ¬½Ó£¬ËùÊö¼ÓÃÜÄ£¿éÓëÉí·ÝÈ·ÈÏÄ£¿éµçÐÔÁ¬½Ó£¬ËùÊöÉí·ÝÈ·ÈÏÄ£¿é·Ö±ðÓëÎÞÏßÍ¨ÐÅÄ£¿é¡¢´æ´¢Æ÷Ïà»¥Á¬½Ó£»±¾·¢Ã÷±ãÓÚÊµÏÖ¼ÓÃÜÓëÉí·ÝÈ·ÈÏ´…	°²È«
»¥ÁªÍø½ðÈÚµç×ÓÐÅÏ¢ÈÏÖ¤ÏµÍ³	ÐÂ½®»Ý¶÷½ðÈÚ·þÎñÓÐÏÞ¹«Ë¾	2017-09-07	2018-06-26	CN108205781A	Ö÷·ÖÀàºÅ£ºG06Q40/00(2012.01)I	ÓÐÐ§-ÊµÖÊÉó²éµÄÉúÐ§	830000 ÐÂ½®Î¬Îá¶û×ÔÖÎÇøÎÚÂ³Ä¾ÆëÊÐ¾­¼Ã¼¼Êõ¿ª·¢Çø¿¦ÄÉË¹ºþ±±Â·455ºÅÈí¼þÔ°ÐÂÈí´´ÖÇ´óÏÃA×ù19Â¥1901-1907ÊÒ	±¾·¢Ã÷¹«¿ªÁË»¥ÁªÍø½ðÈÚµç×ÓÐÅÏ¢ÈÏÖ¤ÏµÍ³£¬Éæ¼°»¥ÁªÍø½ðÈÚÁìÓò£¬¾ßÌåÉæ¼°Ò»ÖÖ»¥ÁªÍø½ðÈÚµç×ÓÐÅÏ¢ÈÏÖ¤ÏµÍ³¡£°üÀ¨»¥ÁªÍøÏµÍ³·þÎñÆ÷£¬ÒÔ¼°Óë»¥ÁªÍøÏµÍ³·þÎñÆ÷½øÐÐÈÏÖ¤ÐÅÏ¢´«ËÍµÄÓÃ»§ÊµÃûÊÖ»úºÍÓÃ»§¼ÆËã»ú£¬ÓÃ»§¼ÆËã»úÁ¬½ÓÖ¸ÎÆ²É¼¯Æ÷¡¢ÉãÏñÍ·ºÍ¼ÆËã»úÊäÈëÉè±¸¡£±¾·¢Ã÷½â¾öÁËÏÖÓÐµÄÈÏÖ¤ÏµÍ³±£ÃÜÐÔ²î£¬ÓÃ»§µÄµç×Ó½ðÈÚ×¢²áÊÖ»úºÅÂëÓëµç×Ó½ðÈÚÕÊºÅÒ»°ãÉèÖÃÓÚÍ¬Ò»ÊÖ»úÉÏ£¬ÔÚÊÖ»ú¶ªÊ§Ê±£¬ÇÔÕß»áÀûÓÃµç×Ó½ðÈÚÏµÍ³ÒÔ»ñÈ¡ÑéÖ¤ÂëµÄ·½Ê½ÐÞ¸ÄÕÊ»§Ã…	°²È«
»ùÓÚÈËÁ³Ê¶±ðµÄÒÆ¶¯Ö§¸¶·½·¨¼°Ïà¹Ø²úÆ·	¹ã¶«Å·çêÒÆ¶¯Í¨ÐÅÓÐÏÞ¹«Ë¾	2017-09-12	2018-02-02	CN107657161A	Ö÷·ÖÀàºÅ£ºG06F21/32(2013.01)I	ÔÚÉó-ÊµÖÊÉó²éµÄÉúÐ§	523860 ¹ã¶«Ê¡¶«Ý¸ÊÐ³¤°²ÕòÎÚÉ³º£±õÂ·18ºÅ	±¾·¢Ã÷ÊµÊ©Àý¹«¿ªÁËÒ»ÖÖ»ùÓÚÈËÁ³Ê¶±ðµÄÒÆ¶¯Ö§¸¶·½·¨¼°Ïà¹Ø²úÆ·¡£·½·¨°üÀ¨£ºÒÆ¶¯ÖÕ¶Ë¼ì²âµ½ÒÆ¶¯ÖÕ¶Ëµ±Ç°µÄÖ§¸¶ÊÂ¼þÂú×ãÔ¤ÉèÖ§¸¶Ìõ¼þ£¬È·¶¨ËùÊöÖ§¸¶ÊÂ¼þÎª¸ß°²È«µÈ¼¶Ö§¸¶ÊÂ¼þ£»»ñÈ¡Ô¤´æµÄËùÊö¸ß°²È«µÈ¼¶Ö§¸¶ÊÂ¼þ¶ÔÓ¦µÄ¸ß°²È«µÈ¼¶ÈËÁ³Ê¶±ð²ßÂÔ£¬ÆäÖÐ£¬ËùÊö¸ß°²È«µÈ¼¶ÈËÁ³Ê¶±ð²ßÂÔ°üÀ¨¶à¸ö´¦Àí²½Öè£¬ËùÊö¶à¸ö´¦Àí²½ÖèÖÐÖÁÉÙÒ»¸ö´¦Àí²½Öè¹ØÁªµÄÖÁÉÙÒ»¸ö²ÎÊýÖµÂú×ãÔ¤ÉèÌõ¼þ£»¸ù¾ÝËùÊö¸ß°²È«µÈ¼¶ÈËÁ³Ê¶±ð²ßÂÔÊ¶±ð³öµ±Ç°ÓÃ»§ÎªºÏ·¨ÓÃ»§Ê±£…	Ö§¸¶
ÈËÁ³Ê¶±ð·½·¨¼°Ïà¹Ø²úÆ·	¹ã¶«Å·çêÒÆ¶¯Í¨ÐÅÓÐÏÞ¹«Ë¾	2017-09-12	2018-02-02	CN107657222A	Ö÷·ÖÀàºÅ£ºG06K9/00(2006.01)I	ÔÚÉó-ÊµÖÊÉó²éµÄÉúÐ§	523860 ¹ã¶«Ê¡¶«Ý¸ÊÐ³¤°²ÕòÎÚÉ³º£±õÂ·18ºÅ	±¾·¢Ã÷ÊµÊ©ÀýÉæ¼°ÒÆ¶¯ÖÕ¶Ë¼¼ÊõÁìÓò£¬¹«¿ªÁËÒ»ÖÖÈËÁ³Ê¶±ð·½·¨¼°Ïà¹Ø²úÆ·¡£ÆäÖÐ£¬¸Ã·½·¨°üÀ¨£ºÒÆ¶¯ÖÕ¶ËÔÚ¼ì²âµ½ÒÆ¶¯ÖÕ¶ËÖÐµÄÖ§¸¶Ó¦ÓÃÆô¶¯µÄÇé¿öÏÂ£¬»ñÈ¡Ä¿±êÈËÁ³Í¼Ïñ²¢»º´æÄ¿±êÈËÁ³Í¼Ïñ£»ÔÚ»ñÈ¡µ½¸ÃÖ§¸¶Ó¦ÓÃµÄÖ§¸¶ÇëÇóµÄÇé¿öÏÂ£¬´Ó»º´æµÄÄ¿±êÈËÁ³Í¼ÏñÖÐÌáÈ¡ÈËÁ³ÌØÕ÷ÐÅÏ¢£¬Ö®ºó½«ÈËÁ³ÌØÕ÷ÐÅÏ¢ÓëÔ¤ÉèµÄÈËÁ³ÌØÕ÷Ä£°å½øÐÐÆ¥Åä¡£ÓÉ´Ë¿É¼û£¬ÊµÊ©±¾·¢Ã÷ÊµÊ©Àý£¬¿ÉÒÔÔÚÖ§¸¶²Ù×÷Ö®Ç°ÌáÇ°»º´æÈËÁ³Í¼Ïñ£¬´Ó¶øÌá¸ßÖ§¸¶²Ù×÷Ê±ÈËÁ³Ê¶±ðµÄÖ´ÐÐËÙ¶È£…	°²È«
Ò»ÖÖÍøÂçÖ§¸¶ÕË»§µÄÏßÏÂÖ§¸¶·½·¨ºÍÏµÍ³	±±¾©ºìÔæ¿Æ¼¼ÓÐÏÞ¹«Ë¾	2017-09-15	2018-01-26	CN107633399A	Ö÷·ÖÀàºÅ£ºG06Q20/34(2012.01)I	ÔÚÉó-ÊµÖÊÉó²éµÄÉúÐ§	100012 ±±¾©ÊÐ³¯ÑôÇø³¯À´¸ß¿Æ¼¼²úÒµÔ°×ÏÔÂÂ·18ºÅÔº10ºÅÂ¥402ÊÒ	±¾·¢Ã÷ÊµÊ©ÀýÌá¹©ÁËÒ»ÖÖÍøÂçÖ§¸¶ÕË»§µÄÏßÏÂÖ§¸¶·½·¨ºÍÏµÍ³£¬ËùÊö·½·¨°üÀ¨£º½ÓÊÕ·¢ÐÐÖÕ¶Ë·¢ËÍµÄÕËºÅÐ´ÈëÖ¸Áî£¬ËùÊöÕËºÅÐ´ÈëÖ¸ÁîÖÐ°üÀ¨´ýÐ´ÈëµÄµÚÈý·½ÍøÂçÖ§¸¶ÕËºÅºÍ´ýÈÏÖ¤µÄÉí·ÝÐÅÏ¢£»¶ÔËùÊöÉí·ÝÐÅÏ¢½øÐÐÈÏÖ¤£»ÈôÈÏÖ¤Í¨¹ý£¬Ôò½«ËùÊöµÚÈý·½ÍøÂçÖ§¸¶ÕËºÅÐ´ÈëICÐ¾Æ¬ÖÐ¡£½ÓÊÕ½»Ò×ÖÕ¶Ë·¢ËÍµÄ½»Ò×Ö¸Áî£¬¶Ô½»Ò×ÐÅÏ¢½øÐÐÊý¾ÝÇ©Ãû£¬Í¨¹ýÈÏÖ¤Æ½Ì¨Êý¾ÝÑéÇ©ºó£¬ÏòµÚÈý·½ÍøÂçÖ§¸¶Æ½Ì¨·¢Æð½»Ò×´¦Àí¡£Í¨¹ýÊµÊ©±¾·¢Ã÷ÊµÊ©Àý¶ÔÓ¦µÄ·½°¸£¬¿ÉÒÔÌáÉýÍøÂ…	Ö§¸¶
Ò»ÖÖ³®ÏäµÄ¼ÓÃÜÏµÍ³¡¢·½·¨ºÍ×°ÖÃ	ÉîÛÚâù»¯µçÄÔ¹É·ÝÓÐÏÞ¹«Ë¾	2017-09-20	2018-02-16	CN107704733A	Ö÷·ÖÀàºÅ£ºG06F21/30(2013.01)I	ÔÚÉó-ÊµÖÊÉó²éµÄÉúÐ§	518038 ¹ã¶«Ê¡ÉîÛÚÊÐÄÏÉ½Çøºóº£´óµÀ2388ºÅâù»¯½ðÈÚ¿Æ¼¼´óÏÃ26Â¥	±¾·¢Ã÷ÊµÊ©Àý¹«¿ªÁËÒ»ÖÖ³®ÏäµÄ¼ÓÃÜÏµÍ³¡¢·½·¨ºÍ×°ÖÃ¡£ËùÊöÏµÍ³°üÀ¨£º´ý¼ÓÃÜ³®Ïä¡¢¼ÓÃÜÉè±¸ºÍÖÁÉÙÒ»¸öµÚÒ»µ××ù¡£ÆäÖÐ£¬µÚÒ»µ××ù·Ö±ðÓëËùÊö¼ÓÃÜÉè±¸ºÍ´ý¼ÓÃÜ³®ÏäÍ¨ÐÅÁ¬½Ó£»µÚÒ»µ××ù£¬ÓÃÓÚ½ÓÊÕ¼ÓÃÜÉè±¸·¢ËÍµÄ¿ØÖÆÐÅºÅ£¬¸ù¾Ý¿ØÖÆÐÅºÅ£¬¶ÁÈ¡·ÅÖÃÓÚËùÊöµÚÒ»µ××ùÉÏµÄ´ý¼ÓÃÜ³®ÏäµÄÊ¶±ð±êÊ¶£¬²¢½«ËùÊöÊ¶±ð±êÊ¶·¢ËÍ¸ø¼ÓÃÜÉè±¸£»¼ÓÃÜÉè±¸ÓÃÓÚ¸ù¾ÝÊ¶±ð±êÊ¶£¬´ÓÔ¤Éè¼Ó³®Êý¾Ý±íÖÐ£¬¶ÁÈ¡´ý¼ÓÃÜ³®Ïä¶ÔÓ¦µÄ¼Ó³®½ð¶î£»Éú³ÉÁ½×éÃÜÔ¿£¬½«Á½×éÃÜÔ¿ÖÐµÄÈ…	°²È«
Ö§¸¶¿ØÖÆ·½·¨¡¢×°ÖÃ¡¢¼ÆËã»ú×°ÖÃ¼°¼ÆËã»ú¿É¶Á´æ´¢½éÖÊ	Öéº£ÊÐ÷È×å¿Æ¼¼ÓÐÏÞ¹«Ë¾	2017-09-21	2018-02-02	CN107656684A	Ö÷·ÖÀàºÅ£ºG06F3/0487(2013.01)I	ÔÚÉó-ÊµÖÊÉó²éµÄÉúÐ§	519085 ¹ã¶«Ê¡Öéº£ÊÐ¿Æ¼¼´´ÐÂº£°¶÷È×å¿Æ¼¼Â¥	±¾·¢Ã÷Ìá¹©Ò»ÖÖÖ§¸¶¿ØÖÆ·½·¨£¬Ó¦ÓÃÓÚ°²×°ÓÐÖÁÉÙÒ»¸öÖ§¸¶Ó¦ÓÃµÄÖÕ¶Ë£¬ËùÊöÖ§¸¶¿ØÖÆ·½·¨°üÀ¨£ºÔÚÖÕ¶ËµÄÆÁÄ»´¦ÓÚÏ¨Ãð×´Ì¬ÏÂ£¬ÈôËùÊöÖÕ¶ËµÄ¿Õ¼ä×ËÌ¬ÐÅÏ¢Âú×ãÔ¤ÉèÌõ¼þ£¬Ôò¿ØÖÆËùÊöÆÁÄ»ÏÔÊ¾ÓëËùÊöÔ¤ÉèÉúÎïÐÅÏ¢Ïà¶ÔÓ¦µÄÖ§¸¶Ó¦ÓÃµÄÖ§¸¶½çÃæ¡£±¾·¢Ã÷»¹Ìá¹©Ò»ÖÖÖ§¸¶¿ØÖÆ×°ÖÃ¡¢¼ÆËã»ú×°ÖÃ¼°¼ÆËã»ú¿É¶Á´æ´¢½éÖÊ¡£±¾·¢Ã÷ÄÜ¹»¿ìËÙÏÔÊ¾ÓëÔ¤ÉèÉúÎïÐÅÏ¢¶ÔÓ¦µÄÖ§¸¶Ó¦ÓÃµÄÖ§¸¶½çÃæ¡£	Ö§¸¶
Ò»ÖÖÈËÁ³Ê¶±ð·½·¨ºÍÒÆ¶¯ÖÕ¶Ë	Î¬ÎÖÒÆ¶¯Í¨ÐÅÓÐÏÞ¹«Ë¾	2017-09-27	2017-12-19	CN107491685A	Ö÷·ÖÀàºÅ£ºG06F21/32(2013.01)I	ÔÚÉó-ÊµÖÊÉó²éµÄÉúÐ§	523860 ¹ã¶«Ê¡¶«Ý¸ÊÐ³¤°²ÕòÎÚÉ³²½²½¸ß´óµÀ283ºÅ	±¾·¢Ã÷Ìá¹©Ò»ÖÖÈËÁ³Ê¶±ð·½·¨ºÍÒÆ¶¯ÖÕ¶Ë£¬¸Ã·½·¨°üÀ¨£º²É¼¯µÚÒ»ÈËÁ³ÐÅÏ¢ºÍµÚ¶þÈËÁ³ÐÅÏ¢£»ÅÐ¶ÏËùÊöµÚ¶þÈËÁ³ÐÅÏ¢ÓëÈËÁ³Êý¾Ý¿âÖÐµÄÌØÕ÷ÐÅÏ¢ÊÇ·ñÆ¥Åä£»ÈôËùÊöµÚ¶þÈËÁ³ÐÅÏ¢ÓëËùÊöÈËÁ³Êý¾Ý¿âÖÐµÄÌØÕ÷ÐÅÏ¢ÏàÆ¥Åä£¬Ôò½«ËùÊöµÚÒ»ÈËÁ³ÐÅÏ¢×÷ÎªÌØÕ÷ÐÅÏ¢Ìí¼Óµ½ËùÊöÈËÁ³Êý¾Ý¿âÖÐ¡£±¾·¢Ã÷ÔÚ²É¼¯µ½µÄµÚ¶þÈËÁ³ÐÅÏ¢ÓëÈËÁ³Êý¾Ý¿âÖÐµÄÌØÕ÷ÐÅÏ¢ÏàÆ¥ÅäÊ±£¬½«µÚÒ»ÈËÁ³ÐÅÏ¢×÷ÎªÌØÕ÷ÐÅÏ¢Ìí¼Óµ½ÈËÁ³Êý¾Ý¿âÖÐ£¬ÄÜ¹»ÓÐÐ§½µµÍÒþË½Ð¹Â¶µÄ·çÏÕ£¬Ê¹ÈËÁ³Ê¶±ðµÄ¹¦ÄÜ¸…	°²È«
Ö§¸¶¿ØÖÆ·½·¨¡¢×°ÖÃ¡¢¼ÆËã»ú×°ÖÃ¼°¼ÆËã»ú¿É¶Á´æ´¢½éÖÊ	Öéº£ÊÐ÷È×å¿Æ¼¼ÓÐÏÞ¹«Ë¾	2017-09-28	2018-01-26	CN107633164A	Ö÷·ÖÀàºÅ£ºG06F21/32(2013.01)I	ÔÚÉó-ÊµÖÊÉó²éµÄÉúÐ§	519085 ¹ã¶«Ê¡Öéº£ÊÐ¿Æ¼¼´´ÐÂº£°¶÷È×å¿Æ¼¼Â¥	±¾·¢Ã÷Ìá¹©Ò»ÖÖÖ§¸¶¿ØÖÆ·½·¨£¬ËùÊöÖ§¸¶¿ØÖÆ·½·¨°üÀ¨£ºÖÕ¶ËµÄÆÁÄ»´¦ÓÚÏ¨Ãð×´Ì¬ÏÂ£¬Èô»ñÈ¡µÄÓÃ»§µÄÉúÎïÌØÕ÷ÐÅÏ¢ÓëÔ¤ÉèÉúÎïÌØÕ÷ÐÅÏ¢Æ¥Åä£¬Ôò¿ØÖÆËùÊöÖÕ¶Ë»ñÈ¡ÖÜÎ§»·¾³ÖÐµÄÍ¼ÏñÐÅÏ¢£»ÈôËùÊöÍ¼ÏñÐÅÏ¢ÖÐ°üÀ¨Ô¤ÉèÍ¼ÏñÐÅÏ¢£¬ÔòÆô¶¯ÓëËùÊöÔ¤ÉèÍ¼ÏñÐÅÏ¢Ïà¶ÔÓ¦µÄÖ§¸¶Ó¦ÓÃ£»ÔÚËùÊöÆÁÄ»ÏÔÊ¾ÓëËùÊöÔ¤ÉèÍ¼ÏñÐÅÏ¢Ïà¶ÔÓ¦µÄÖ§¸¶Ó¦ÓÃµÄÖ§¸¶½çÃæ¡£±¾·¢Ã÷»¹Ìá¹©Ò»ÖÖÖ§¸¶¿ØÖÆ×°ÖÃ¡¢¼ÆËã»ú×°ÖÃ¼°¼ÆËã»ú¿É¶Á´æ´¢½éÖÊ¡£±¾·¢Ã÷¿É¿ìËÙÏÔÊ¾ÓëÔ¤ÉèÍ¼ÏñÐÅÏ¢Ïà¶ÔÓ…	Ö§¸¶
ÈËÁ³Ê¶±ðÖ§¸¶ÏµÍ³¼°Æä¹¤×÷·½·¨	ÄÏ¾©ÖÐ¸ßÖªÊ¶²úÈ¨¹É·ÝÓÐÏÞ¹«Ë¾	2017-09-29	2017-12-22	CN107506631A	Ö÷·ÖÀàºÅ£ºG06F21/32(2013.01)I	ÔÚÉó-ÊµÖÊÉó²éµÄÉúÐ§	211100 ½­ËÕÊ¡ÄÏ¾©ÊÐ½­Äþ¿ª·¢ÇøÓ­´äÂ·7ºÅÇ§ÈË´óÏÃ	±¾·¢Ã÷Éæ¼°Ò»ÖÖÈËÁ³Ê¶±ðÖ§¸¶ÏµÍ³¼°Æä¹¤×÷·½·¨£¬±¾ÈËÁ³Ê¶±ðÖ§¸¶ÏµÍ³°üÀ¨ÓÃÓÚÈËÁ³Í¼Ïñ²É¼¯µÄÓÃ»§Ö§¸¶ÖÕ¶Ë¡¢Ö§¸¶·þÎñÆ÷¡¢Ô¤¿Û·Ñ·þÎñÆ÷ºÍÉÌ¼ÒÊÕÒøÖÕ¶Ë£»±¾ÈËÁ³Ê¶±ðÖ§¸¶ÏµÍ³¼°Æä¹¤×÷·½·¨£¬½áºÏÈËÁ³Ê¶±ð¼¼Êõ¡¢µØÀíÎ»ÖÃÊý¾ÝË«ÖØÈÏÖ¤£¬²¢ÇÒ»ùÓÚÈýÖÖÍ¨ÐÅÐ­ÒéÊµÏÖÁË²»Í¬Éè±¸¼äµÄÏà»¥ÈÏÖ¤£¬¼´Ê¹ÓÃÁË²»Í¬µÄÍ¨µÀ½øÐÐÈÏÖ¤£¬ÓÐÐ§µÄ·ÀÖ¹ÁËÍ¬Ò»Í¨µÀ´æÔÚµÄ°²È«ÎÊÌâ£»Í¬Ê±Ìá³öÊ¹ÓÃËæ»úÊý½øÐÐÎ±ÈÏÖ¤£¬ÄÜ¹»ÓÐÐ§µÄ¶ÔºÚ¿ÍµÄ¹¥»÷ÐÐÎª½øÐÐ¸ÉÈÅ£¬Ìá¸ßÈÏÖ¤µÄ°…	°²È«
½ðÈÚAPPµÄÈ¨ÏÞÉèÖÃ·½·¨¡¢×°ÖÃ¡¢Éè±¸¼°´æ´¢½éÖÊ	Æ½°²¿Æ¼¼£¨ÉîÛÚ£©ÓÐÏÞ¹«Ë¾	2017-09-30	2018-03-27	CN107844698A	Ö÷·ÖÀàºÅ£ºG06F21/45(2013.01)I	ÔÚÉó-ÊµÖÊÉó²éµÄÉúÐ§	518000 ¹ã¶«Ê¡ÉîÛÚÊÐ¸£ÌïÇø°ËØÔÁë¹¤ÒµÇøÆ½°²´óÏÃÁùÂ¥	±¾·¢Ã÷Éæ¼°½ðÈÚAPPÈ¨ÏÞÉèÖÃ¼¼ÊõÁìÓò£¬±¾·¢Ã÷Ìá¹©Ò»ÖÖ½ðÈÚAPPÈ¨ÏÞÉèÖÃµÄ·½·¨¡¢×°ÖÃ¡¢Éè±¸¼°´æ´¢½éÖÊ£¬½ðÈÚAPPÈ¨ÏÞÉèÖÃµÄ·½·¨°üÀ¨£ºµ±½ÓÊÕµ½È¨ÏÞÉèÖÃÖ¸ÁîÊ±£¬µ¯³öÈ¨ÏÞÉèÖÃ²Ëµ¥£¬È¨ÏÞÉèÖÃ²Ëµ¥°üÀ¨½ÇÉ«Ãû³ÆÉèÖÃ¿ò¡¢È¨ÏÞ·¶Î§ÉèÖÃ¿òÒÔ¼°ÓÃ»§Êý¾ÝÃ÷Ï¸±í£¬ÓÃ»§Êý¾ÝÃ÷Ï¸±í¸ù¾ÝÊý¾Ý¿âÖÐ´æ´¢µÄÓÃ»§ÐÅÏ¢ÐÎ³É£»½«½ÇÉ«Ãû³Æ¡¢È¨ÏÞ·¶Î§ÒÔ¼°ËùÑ¡¶¨µÄÓÃ»§Êý¾ÝÃ÷Ï¸±íÖÐµÄÓÃ»§ÐÅÏ¢½øÐÐ¹ØÁª²¢Éú³É½ÇÉ«Ã÷Ï¸±í£»µ±ÓÃ»§ÔÚ¿Í»§¶ËµÇÂ¼ºó£¬¸ù¾ÝËùÊö½ÇÉ«Ã÷Ï¸±í…	Êý¾Ý·ÖÎö
Ò»ÖÖ½ÚÊ¡Õ¼µØ¿Õ¼äµÄ½Ö±ßÊ½ÎÞÈË³¬ÊÐ	ÖØÇìÍ­É½ÌìÑ¯¿Æ¼¼ÓÐÏÞ¹«Ë¾	2017-10-12	2018-02-09	CN107679959A	Ö÷·ÖÀàºÅ£ºG06Q30/06(2012.01)I	ÔÚÉó-ÊµÖÊÉó²éµÄÉúÐ§	400000 ÖØÇìÊÐ¾ÅÁúÆÂÇøÓåÖÝÂ·18ºÅ¸ß´´½õÒµ´óÏÃ6²ã6-1-2ºÅ	±¾·¢Ã÷¹«¿ªÁËÒ»ÖÖ½ÚÊ¡Õ¼µØ¿Õ¼äµÄ½Ö±ßÊ½ÎÞÈË³¬ÊÐ£¬°üÀ¨»õ¼Ü¡¢¼à¿ØÊ¶±ðÉè±¸¡¢×Ô¶¯²¹»õÏµÍ³¡¢Ö§¸¶½áËãÏµÍ³¡¢ÐéÄâÕ¹Ê¾ÏµÍ³£»»õ¼ÜÎªÎÞÈË³¨¿ªÊ½»õ¼Ü£»ËùÊö¼à¿ØÊ¶±ðÉè±¸ÊµÏÖ¶Ô¹ºÂòÕßµÄ¼à¿ØºÍÉí·ÝÊ¶±ð£»Ö§¸¶½áËãÏµÍ³°üÀ¨ÔÚÏßÖ§¸¶ÓëÍ¶±ÒÖ§¸¶£»ËùÊöÐéÄâÕ¹Ê¾ÏµÍ³°üÀ¨¶Ô´óÐÍ»òÌØÊâÉÌÆ·½øÐÐÕ¹Ê¾µÄÏÔÊ¾Éè±¸ÒÔ¼°ÔÚÏß¹ºÂòÏµÍ³£»×Ô¶¯²¹»õÏµÍ³ÊµÏÖÎÞÈË×Ô¶¯²¹»õ£»»¹°üÀ¨±¨¾¯ÏµÍ³£¬ÔÚ¿Í»§È¡×ßÉÌÆ·¶øÎ´¸¶¿îÊ±£¬ÏµÍ³×Ô¶¯ÌáÐÑºóÖ´ÒâÈ¡×ßÉÌÆ·£¬Ôò×Ô¶¯±¨¾¯¡…	Ö§¸¶
Êý×Ö»õ±ÒµÄ½»Ò×ÑéÖ¤ºÍµÇ¼Ç·½·¨¼°ÏµÍ³	ÖÐ¹úÒøÁª¹É·ÝÓÐÏÞ¹«Ë¾	2017-10-13	2018-05-08	CN108009917A	Ö÷·ÖÀàºÅ£ºG06Q40/04(2012.01)I	ÔÚÉó-ÊµÖÊÉó²éµÄÉúÐ§	200135 ÉÏº£ÊÐÆÖ¶«ÐÂÇøº¬Ð¦Â·36ºÅÒøÁª´óÏÃ	±¾·¢Ã÷Ìá¹©Ò»ÖÖÊý×Ö»õ±ÒµÄ½»Ò×ÑéÖ¤ºÍµÇ¼Ç·½·¨£¬°üÀ¨£ºÖÐÐÄ½ÚµãÊÚÈ¨Ò»¸ö»ò¶à¸ö»ú¹¹½øÐÐ½»Ò×ÑéÖ¤£»ÔÚ½ÓÊÕÓÃ»§·¢ËÍµÄ½»Ò×ÇëÇóºÍÔ¤ÏÈÑ¡ÔñµÄ±³Êé²ßÂÔºó£¬ËùÊöÖÐÐÄ½Úµã¶ÔËùÊö½»Ò×ÇëÇó½øÐÐ½âÎö²¢Éú³ÉµÚÒ»Êý¾Ý°ü£¬Ëæºó½«ËùÊöµÚÒ»Êý¾Ý°ü·¢ËÍ¸øËùÊöÒ»¸ö»ò¶à¸ö±»ÊÚÈ¨»ú¹¹½øÐÐ½»Ò×ÑéÖ¤£»´ÓËùÊöÒ»¸ö»ò¶à¸ö±»ÊÚÈ¨»ú¹¹½ÓÊÕÑéÖ¤·´À¡½á¹û£»ÒÔ¼°ÔÚËùÊöÖÐÐÄ½ÚµãÅÐ¶ÏËù½ÓÊÕµÄÑéÖ¤·´À¡½á¹ûÂú×ãËùÊö±³Êé²ßÂÔÖÐµÄÒªÇóÊ±£¬ËùÊöÖÐÐÄ½Úµã¶Ô¸Ã½»Ò×½øÐÐµÇ¼Ç²¢¸…	°²È«
Ò»ÖÖÉí·ÝÈÏÖ¤·½·¨¡¢×°ÖÃ¡¢ÏµÍ³¡¢Éè±¸¼°´æ´¢½éÖÊ	ÉîÛÚâù»¯µçÄÔ¹É·ÝÓÐÏÞ¹«Ë¾	2017-10-19	2018-01-26	CN107633162A	Ö÷·ÖÀàºÅ£ºG06F21/31(2013.01)I	ÔÚÉó-ÊµÖÊÉó²éµÄÉúÐ§	518038 ¹ã¶«Ê¡ÉîÛÚÊÐÄÏÉ½Çøºóº£´óµÀ2388ºÅâù»¯½ðÈÚ¿Æ¼¼´óÏÃ26Â¥	±¾·¢Ã÷ÊµÊ©Àý¹«¿ªÁËÒ»ÖÖÉí·ÝÈÏÖ¤·½·¨¡¢×°ÖÃ¡¢ÏµÍ³¡¢Éè±¸¼°´æ´¢½éÖÊ£¬ÆäÖÐ£¬ËùÊö·½·¨°üÀ¨£º½ðÈÚ»ú¾ßÈç¹û¼ì²âµ½Éí·ÝÈÏÖ¤²¿¼þÕ÷ÓÃÇëÇó£¬Ôò¿ªÆô×ÔÉíÖÁÉÙÒ»¸öÉí·ÝÈÏÖ¤²¿¼þ£¬ÆäÖÐ£¬ËùÊöÉí·ÝÈÏÖ¤²¿¼þÕ÷ÓÃÇëÇóÇø±ðÓÚ½ðÈÚ½»Ò×¹ý³ÌÖÐÉú³ÉµÄ¸÷ÖÖÇëÇó£»ËùÊö½ðÈÚ»ú¾ß»ñÈ¡ËùÊöÖÁÉÙÒ»¸öÉí·ÝÈÏÖ¤²¿¼þ²É¼¯µÄÉí·ÝÈÏÖ¤ÐÅÏ¢£»ËùÊö½ðÈÚ»ú¾ß»ñÈ¡ÓëËùÊöÉí·ÝÈÏÖ¤ÐÅÏ¢¶ÔÓ¦µÄÈÏÖ¤½á¹û£¬²¢Êä³öÓëËùÊöÈÏÖ¤½á¹û¶ÔÓ¦µÄÈÏÖ¤¹ØÁªÐÅÏ¢£¬ÄÜ¹»ÎªÂú×ãÉîÈë°²È«ÑéÖ¤Ìõ¼þµ…	°²È«
Ò»ÖÖÊÖ»ú½âËø·½·¨	·ðÉ½ÊÐÕÂÑï¿Æ¼¼ÓÐÏÞ¹«Ë¾	2017-10-19	2018-03-30	CN107862186A	Ö÷·ÖÀàºÅ£ºG06F21/32(2013.01)I	ÔÚÉó-ÊµÖÊÉó²éµÄÉúÐ§	528100 ¹ã¶«Ê¡·ðÉ½ÊÐÈýË®ÇøÀÖÆ½Õò±¦Ó¯Ê±´ú¹ã³¡ÇéÈË½ÖÇøÊ×²ã3×ù5ºÅ£¨×¡ËùÉê±¨£©	±¾·¢Ã÷Ìá¹©ÁËÒ»ÖÖÊÖ»ú½âËø·½·¨£¬Éæ¼°ÒÆ¶¯ÖÕ¶ËÁìÓò¡£ÊÖ»ú½âËø·½·¨£¬ÓÃÓÚ¸ù¾Ý²»Í¬µÄÖ¸ÎÆÐÅÏ¢½âËø²»Í¬µÄÊÖ»ú¹¦ÄÜ£¬°üÀ¨£ºS1£¬µ±ÊÖ»ú´¦ÓÚËø¶¨×´Ì¬Ê±£¬½ÓÊÕÖ¸ÎÆÐÅÏ¢£»S2£¬Èç½ÓÊÕµ½Ö¸ÎÆÐÅÏ¢£¬½«ËùÊöÖ¸ÎÆÐÅÏ¢ÓëÔ¤ÏÈÉè¶¨µÄÖ¸ÎÆÐÅÏ¢±È¶Ô£»S3£¬ÈçÏàÍ¬£¬Ôò½âËøÓëËùÊöÖ¸ÎÆÐÅÏ¢¶ÔÓ¦µÄÊÖ»ú¹¦ÄÜ£»ÆäÖÐ£¬Ö¸ÎÆ½âËøµÄ·½·¨ÉèÖÃ³ÉÍ¨¹ý¹âÑ§Ö¸ÎÆÊ¶±ð×°ÖÃ½âËø¡£±¾·¢Ã÷µÄ»ùÓÚÖ¸ÎÆÐÅÏ¢½âËøÊÖ»úµÄ·½·¨£¬ÓÉÓÚ²ÉÓÃ²»Í¬µÄÖ¸ÎÆÐÅÏ¢¶ÔÓ¦½âËø²»Í¬µÄÊÖ»ú¹¦ÄÜ£¬Òò´Ë£…	Ö§¸¶
Ò»ÖÖ»ùÓÚÖ¸ÎÆÐÅÏ¢½âËøÊÖ»úµÄ·½·¨	·ðÉ½ÊÐÕÂÑï¿Æ¼¼ÓÐÏÞ¹«Ë¾	2017-10-19	2018-03-06	CN107770378A	Ö÷·ÖÀàºÅ£ºH04M1/725(2006.01)I	ÔÚÉó-ÊµÖÊÉó²éµÄÉúÐ§	528100 ¹ã¶«Ê¡·ðÉ½ÊÐÈýË®ÇøÀÖÆ½Õò±¦Ó¯Ê±´ú¹ã³¡ÇéÈË½ÖÇøÊ×²ã3×ù5ºÅ£¨×¡ËùÉê±¨£©	±¾·¢Ã÷Ìá¹©ÁËÒ»ÖÖ»ùÓÚÖ¸ÎÆÐÅÏ¢½âËøÊÖ»úµÄ·½·¨£¬Éæ¼°ÖÕ¶Ë¼¼ÊõÁìÓò¡£¸Ã·½·¨°üÀ¨£ºS1£¬µ±ÊÖ»ú´¦ÓÚËø¶¨×´Ì¬Ê±£¬½ÓÊÕÖ¸ÎÆÐÅÏ¢£»S2£¬Èç½ÓÊÕµ½Ö¸ÎÆÐÅÏ¢£¬½«ËùÊöÖ¸ÎÆÐÅÏ¢ÓëÔ¤ÏÈÉè¶¨µÄÖ¸ÎÆÐÅÏ¢±È¶Ô£»S3£¬ÈçÏàÍ¬£¬Ôò½âËøÓëËùÊöÖ¸ÎÆÐÅÏ¢¶ÔÓ¦µÄÊÖ»ú¹¦ÄÜ£»ÆäÖÐ£¬Ö¸ÎÆ½âËøµÄ·½·¨ÉèÖÃ³ÉÍ¨¹ý³¬Éù²¨Ö¸ÎÆÊ¶±ð×°ÖÃ½âËø¡£±¾·¢Ã÷µÄ»ùÓÚÖ¸ÎÆÐÅÏ¢½âËøÊÖ»úµÄ·½·¨£¬ÓÉÓÚ²ÉÓÃ²»Í¬µÄÖ¸ÎÆÐÅÏ¢¶ÔÓ¦½âËø²»Í¬µÄÊÖ»ú¹¦ÄÜ£¬Òò´Ë£¬ÔÚÎ´³ÉÄêÈËÊ¹ÓÃ×Ô¼ºµÄÖ¸ÎÆ½âËøÊ±£¬Ö…	Ö§¸¶
Ò»ÖÖÉí·ÝÑéÖ¤·½·¨¼°×°ÖÃ	ÖÐ¹úÒÆ¶¯Í¨ÐÅ¼¯ÍÅÕã½­ÓÐÏÞ¹«Ë¾	2017-10-20	2019-04-30	CN109697340A	Ö÷·ÖÀàºÅ£ºG06F21/30(2013.01)I	ÔÚÉó-¹«¿ª	310016 Õã½­Ê¡º¼ÖÝÊÐ½â·Å¶«Â·19ºÅ	±¾·¢Ã÷ÊµÊ©ÀýÌá¹©Ò»ÖÖÉí·ÝÑéÖ¤·½·¨¼°×°ÖÃ¡£ËùÊö·½·¨°üÀ¨£º»ñÈ¡´ý²âÓÃ»§µÄ×¢²áÐÅÏ¢ºÍ´ý²âÓÃ»§ÐÐÎªÊý¾Ý£»¸ù¾ÝËùÊö×¢²áÐÅÏ¢È·¶¨ËùÊö´ý²âÓÃ»§ËùÊôµÄÈºÌå£»¸ù¾ÝËùÊö´ý²âÓÃ»§ÐÐÎªÊý¾ÝÈ·¶¨ËùÊö´ý²âÓÃ»§ÓëËùÊöÈºÌåµÄÆ¥Åä¶È£»¸ù¾ÝËùÊöÆ¥Åä¶ÈÅÐ¶ÏËùÊö´ý²âÓÃ»§ÓëËùÊö×¢²áÐÅÏ¢ÊÇ·ñÒ»ÖÂ¡£±¾·¢Ã÷ÊµÊ©ÀýÌá¹©µÄÉí·ÝÑéÖ¤·½·¨£¬Í¨¹ý»ñÈ¡´ý²âÓÃ»§µÄ×¢²áÐÅÏ¢ºÍ´ý²âÓÃ»§ÐÐÎªÊý¾Ý£¬¸ù¾Ý×¢²áÐÅÏ¢È·¶¨´ý²âÓÃ»§ËùÊôµÄÈºÌå£¬¸ù¾Ý´ý²âÓÃ»§ÐÐÎªÊý¾ÝÈ·¶¨´ý²âÓÃ»…	°²È«
Ò»ÖÖ¶àÕË»§°²È«¸ôÀë·½·¨¼°ÏµÍ³	É½¶«Ê¡³ÇÊÐÉÌÒµÒøÐÐºÏ×÷ÁªÃËÓÐÏÞ¹«Ë¾	2017-10-20	2018-03-06	CN107767136A	Ö÷·ÖÀàºÅ£ºG06Q20/38(2012.01)I	ÔÚÉó-ÊµÖÊÉó²éµÄÉúÐ§	250101 É½¶«Ê¡¼ÃÄÏÊÐ¸ßÐÂÇøÐÂãø´ó½Ö2008ºÅÒøºÉ´óÏÃ5-601ºÅ	±¾·¢Ã÷Ìá¹©ÁËÒ»ÖÖ¶àÕË»§°²È«¸ôÀë·½·¨¼°ÏµÍ³£¬ËùÊöµÄ·½·¨°üÀ¨£ºS1£ºÕÐ±ê·½ÔÚºËÐÄÏµÍ³ÉèÁ¢ÓÃÓÚ¶Ô¹«½áËãµÄÄ¸ÕË»§£¬ºËÐÄÏµÍ³Éú³ÉÓë¸ÃÄ¸ÕË»§¶ÔÓ¦µÄÈô¸É×ÓÕË»§£»S2£ºÍ¶±ê·½·¢³öÍ¶±êÉêÇë£»S3£ººËÐÄÏµÍ³½ÓÊÜÉêÇë£¬²¢½«Ä¸ÕËºÅºÍÕÐ±êÐÅÏ¢·¢ËÍ¸øÍâÁªÒµÎñÏµÍ³£»S4£ºÍâÁªÒµÎñÏµÍ³¸ù¾Ý½ÓÊÕµ½µÄÕÐ±êÐÅÏ¢½¨Á¢×ÓÕË»§£»S5£ººËÐÄÏµÍ³ÒÀ¾ÝÕÐ±êÐÅÏ¢¼ì²â²¢ÐÞ¸Ä×ÓÕË»§µÄÖ§¸¶×´Ì¬£»S6£º¶¨±êÍê³Éºó£¬½«Ä¸ÕË»§ÖÐµÄ±£Ö¤½ðÍË»¹¸øÍ¶±ê·½¡£ËùÊöµÄÏµÍ³°üÀ¨£ººËÐÄÏ…	°²È«
¼ÓÃÜ·½·¨¡¢×°ÖÃºÍÏµÍ³	ÖÐ¹úÒøÐÐ¹É·ÝÓÐÏÞ¹«Ë¾	2017-10-23	2018-03-20	CN107818265A	Ö÷·ÖÀàºÅ£ºG06F21/60(2013.01)I	ÔÚÉó-ÊµÖÊÉó²éµÄÉúÐ§	100818 ±±¾©ÊÐÎ÷³ÇÇø¸´ÐËÃÅÄÚ´ó½Ö1ºÅ	±¾ÉêÇë¹«¿ªÁËÒ»ÖÖ¼ÓÃÜ·½·¨¡¢×°ÖÃºÍÏµÍ³£¬Éæ¼°½ðÈÚ°²È«ÁìÓò£¬ÓÃÓÚÖ§³ÖÓ²¼þ¼ÓÃÜ»ú¼ÓÃÜºÍÈí¼þ¼ÓÃÜ»ú¼ÓÃÜ¡£¼ÓÃÜ·½·¨°üÀ¨£º´Ó¿Í»§»ú»ñÈ¡½Ó¿ÚÊý¾ÝÏî£¬½Ó¿ÚÊý¾ÝÏîÎª°´ÕÕÍ³Ò»½Ó¿Ú¹æ·¶ËùÉú³É£¬½Ó¿ÚÊý¾ÝÏî°üÀ¨Ö¸ÁîÂë£»Èç¹û²ÉÓÃÓ²¼þ¼ÓÃÜ»ú£¬Ôò¸ù¾ÝÖ¸ÁîÂëÈ·¶¨¶ÔÓ¦µÄÓ²¼þ¼ÓÃÜ»úµÄ½Ó¿Ú¹æ·¶£¬¶Ô½Ó¿ÚÊý¾ÝÏî½øÐÐ´¦Àíºó¸ù¾ÝÓ²¼þ¼ÓÃÜ»úµÄ½Ó¿Ú¹æ·¶·¢ËÍ¸øÓ²¼þ¼ÓÃÜ»úÓÃÓÚ¼ÓÃÜ£»Èç¹û²ÉÓÃÈí¼þ¼ÓÃÜ»ú£¬ÇÒÖ¸ÁîÂëÎª±ê×¼Ö¸Áî£¬Ôòµ÷ÓÃ±ê×¼ÃÜÔ¿Éú³Éº¯ÊýÉú³É±¾µØÖ…	°²È«
ÒÆ¶¯ÖÕ¶Ë¼°ÒÆ¶¯Ö§¸¶·½·¨	ºã±¦¹É·ÝÓÐÏÞ¹«Ë¾	2017-10-24	2018-02-09	CN107679858A	Ö÷·ÖÀàºÅ£ºG06Q20/38(2012.01)I	ÔÚÉó-ÊµÖÊÉó²éµÄÉúÐ§	212355 ½­ËÕÊ¡Õò½­ÊÐµ¤ÑôÊÐºáÌÁ¹¤ÒµÇø	±¾ÉêÇëÌá¹©Ò»ÖÖÒÆ¶¯ÖÕ¶Ë£¬ÒÆ¶¯ÖÕ¶ËÖ§³ÖÏà»¥¸ôÀëµÄ¿ª·ÅÏµÍ³»·¾³ºÍ¿ÉÐÅÖ´ÐÐ»·¾³£¬¿ÉÐÅÖ´ÐÐ»·¾³ÖÐÔËÐÐÇ®°üÖ§¸¶Ó¦ÓÃ£¬Ç®°üÖ§¸¶Ó¦ÓÃ°üÀ¨Í¨Ñ¶¹ÜÀíÄ£¿é¡¢ÎÄ¼þ¹ÜÀíÄ£¿é¡¢°²È«¹ÜÀíÄ£¿éÒÔ¼°ÃüÁî¹ÜÀíÄ£¿é£»Í¨Ñ¶¹ÜÀíÄ£¿éÍ¨¹ýAPDUÃüÁî?Ó¦´ð¶ÔÓë¿ª·ÅÏµÍ³»·¾³½øÐÐ½»»¥£»ÃüÁî¹ÜÀíÄ£¿éÓëÍ¨Ñ¶¹ÜÀíÄ£¿éÁ¬½Ó£¬ÓÃÓÚ½ÓÊÕAPDUÃüÁîÒÔ¼°·µ»ØAPDUÃüÁîµÄ´¦Àí½á¹û£»°²È«¹ÜÀíÄ£¿éºÍÎÄ¼þ¹ÜÀíÄ£¿éÓëÃüÁî¹ÜÀíÄ£¿éÁ¬½Ó£¬·Ö±ðÓÃÓÚ¹ÜÀí°²È«ÈÏÖ¤Êý¾ÝºÍÎÄ¼þÊý¾Ý¡£±¾ÉêÇë…	°²È«
Ïû·Ñ´û¿îµç×ÓºÏÍ¬µÄÉú³É·½·¨¡¢×°ÖÃ¡¢±ãÐ¯ÖÕ¶Ë¼°·þÎñÆ÷	ÉîÛÚ·ç±ª»¥ÁªÍø¿Æ¼¼ÓÐÏÞ¹«Ë¾	2017-10-25	2018-03-27	CN107844949A	Ö÷·ÖÀàºÅ£ºG06Q10/10(2012.01)I	ÔÚÉó-ÊµÖÊÉó²éµÄÉúÐ§	518000 ¹ã¶«Ê¡ÉîÛÚÊÐÁú»ªÇøÁú»ª½ÖµÀÈýÁªÉçÇø¹­´åÐÂ³ÇÉÌÒµÖÐÐÄB×ùÊ®ÎåÂ¥1501-1509	±¾·¢Ã÷ÊÊÓÃÓÚ½ðÈÚÁìÓò£¬Ìá¹©ÁËÒ»ÖÖÏû·Ñ´û¿îµç×ÓºÏÍ¬µÄÉú³É·½·¨¡¢×°ÖÃ¡¢±ãÐ¯ÖÕ¶Ë¼°·þÎñÆ÷¡£ËùÊö·½·¨°üÀ¨£º±ãÐ¯ÖÕ¶Ë½ÓÊÕÊäÈëµÄÏû·Ñ´û¿îµÄÉêÇëÐÅÏ¢£»±ãÐ¯ÖÕ¶ËÏò·þÎñÆ÷·¢ËÍËùÊöÏû·Ñ´û¿îµÄÉêÇëÐÅÏ¢£¬ÒÔÓÉ·þÎñÆ÷¶ÔËùÊöÏû·Ñ´û¿îµÄÉêÇëÐÅÏ¢½øÐÐÉóÅú£¬ÉóÅúÍ¨¹ýºó£¬ÓÉ·þÎñÆ÷·¢ËÍ°üÀ¨Ëæ»úÑéÖ¤ÂëºÍÏû·Ñ´û¿îºÏÍ¬µÄÒªµãµÄÏûÏ¢ÖÁ½è¿îÈËµÄÁªÏµ·½Ê½£»±ãÐ¯ÖÕ¶Ë½ÓÊÕÊäÈëµÄËæ»úÑéÖ¤Âë£»±ãÐ¯ÖÕ¶Ë·¢ËÍËæ»úÑéÖ¤Âë¸ø·þÎñÆ÷£¬ÒÔÓÉ·þÎñÆ÷½ÓÊÕµ½ÕýÈ·µÄËæ»úÑéÖ…	½è´û
3DÈËÁ³Éí·ÝÈÏÖ¤·½·¨Óë×°ÖÃ	ÉîÛÚ°Â±ÈÖÐ¹â¿Æ¼¼ÓÐÏÞ¹«Ë¾	2017-10-26	2018-01-19	CN107609383A	Ö÷·ÖÀàºÅ£ºG06F21/32(2013.01)I	ÔÚÉó-ÊµÖÊÉó²éµÄÉúÐ§	518057 ¹ã¶«Ê¡ÉîÛÚÊÐÄÏÉ½ÇøÔÁº£½ÖµÀÑ§¸®Â·63ºÅ¸ßÐÂÇøÁªºÏ×Ü²¿´óÏÃ11-13Â¥	±¾·¢Ã÷Ìá¹©Ò»ÖÖ3DÈËÁ³Éí·ÝÈÏÖ¤·½·¨¼°×°ÖÃ£¬°üÀ¨ÒÔÏÂ²½Öè£º»ñÈ¡°üº¬Ä¿±êÈËÁ³µÄÉî¶ÈÍ¼ÏñÒÔ¼°¶þÎ¬Í¼Ïñ£»½«ËùÊöÉî¶ÈÍ¼ÏñÓë²Î¿¼ÈËÁ³3DÎÆÀíÍ¼Ïñ½øÐÐÅä×¼£¬ÒÔ»ñÈ¡ËùÊöÄ¿±êÈËÁ³µÄ×ËÌ¬ÐÅÏ¢£»½«ËùÊö¶þÎ¬Í¼Ïñ°´ËùÊö×ËÌ¬ÐÅÏ¢¶ÔÆëÒÔµÃµ½Ä¿±êÈËÁ³¶þÎ¬Í¼Ïñ£»ÌáÈ¡ËùÊöÄ¿±êÈËÁ³¶þÎ¬Í¼ÏñÖÐµÄÌØÕ÷ÐÅÏ¢£»½«ËùÊöÄ¿±êÈËÁ³¶þÎ¬Í¼ÏñÖÐµÄÌØÕ÷ÐÅÏ¢Óë²Î¿¼ÈËÁ³¶þÎ¬Í¼ÏñÖÐµÄÌØÕ÷ÐÅÏ¢½øÐÐÏàËÆ¶È±È¶Ô¡£±¾·½·¨½áºÏ3DÐÅÏ¢»ñÈ¡Ä¿±êÈËÁ³µÄ×ËÌ¬²¢°´ÕÕ¸Ã×ËÌ¬½øÐÐ¶ÔÆë£¬½…	°²È«
½ðÈÚÖ§¸¶ÖÕ¶Ë¼¤»î·½·¨¼°ÆäÏµÍ³	¸£½¨ÁªµÏÉÌÓÃÉè±¸ÓÐÏÞ¹«Ë¾	2017-10-27	2018-05-04	CN107995985A	Ö÷·ÖÀàºÅ£ºG07G1/00(2006.01)I	ÔÚÉó-ÊµÖÊÉó²éµÄÉúÐ§	350000 ¸£½¨Ê¡¸£ÖÝÊÐ¹ÄÂ¥ÇøÈí¼þ´óµÀ89ºÅ¸£ÖÝÈí¼þÔ°AÇø17ºÅÂ¥	±¾·¢Ã÷Ìá¹©Ò»ÖÖ½ðÈÚÖ§¸¶ÖÕ¶Ë¼¤»î·½·¨¼°ÆäÏµÍ³£¬·½·¨°üÀ¨Ö§¸¶ÖÕ¶ËºÍÖÇÄÜIC¿¨£»ËùÊöÖ§¸¶ÖÕ¶ËÖÐ´æ´¢ÓÐ¸ùÖ¤Êé£»ËùÊöÖÇÄÜIC¿¨ÖÐ´æ´¢ÓÐ¹¤×÷Ö¤ÊéºÍ¶ÔÓ¦µÄË½Ô¿£»ËùÊö·½·¨°üÀ¨£ºÖ§¸¶ÖÕ¶Ë»ñÈ¡²Ù×÷Ô±ÊäÈëµÄ¿ÚÁî£¬²¢½«ËùÊö¿ÚÁî·¢ËÍÖÁÓëÆäÁ¬½ÓµÄÖÇÄÜIC¿¨£»ÈôÖÇÄÜIC¿¨ÑéÖ¤ËùÊö¿ÚÁîÍ¨¹ý£¬Ôò½â³ý¶ÔÆä´æ´¢µÄË½Ô¿µÄ±£»¤£»ËùÊöÖ§¸¶ÖÕ¶ËÒÀ¾ÝÆä¸ùÖ¤Êé£¬ÒÔÊý×ÖÇ©Ãû·½Ê½¶ÔÖÇÄÜIC¿¨½øÐÐÑéÖ¤£¬ÈôÑéÖ¤Í¨¹ý£¬ÔòÔÊÐí¼¤»îÖ§¸¶ÖÕ¶Ë¡£±¾·¢Ã÷²»½öÄÜÔÚ±£Ö¤²Ù×÷°²È«Ð…	°²È«
½ðÈÚAPP½çÃæµÄÏÔÊ¾·½·¨¡¢×°ÖÃ¡¢Éè±¸¼°´æ´¢½éÖÊ	Æ½°²¿Æ¼¼£¨ÉîÛÚ£©ÓÐÏÞ¹«Ë¾	2017-10-30	2018-03-09	CN107784207A	Ö÷·ÖÀàºÅ£ºG06F21/16(2013.01)I	ÔÚÉó-ÊµÖÊÉó²éµÄÉúÐ§	518000 ¹ã¶«Ê¡ÉîÛÚÊÐ¸£ÌïÇø°ËØÔÁë¹¤ÒµÇøÆ½°²´óÏÃÁùÂ¥	±¾·¢Ã÷ÊôÓÚ½ðÈÚAPP½çÃæÏÔÊ¾¼¼ÊõÁìÓò£¬Ìá¹©Ò»ÖÖ½ðÈÚAPP½çÃæµÄÏÔÊ¾·½·¨¡¢×°ÖÃ¡¢Éè±¸¼°´æ´¢½éÖÊ£¬¸ÃÏÔÊ¾·½·¨°üÀ¨£º»ñÈ¡ÓÃ»§ÐÅÏ¢Êý¾Ý¿âµÄµØÖ·£¬²¢ÓëÓÃ»§ÐÅÏ¢Êý¾Ý¿â½øÐÐ¹ØÁª£»µ±ÓÃ»§µÇÂ½½ðÈÚAPPÊ±£¬»ñÈ¡ÓÃ»§µÄµÇÂ¼ÐÅÏ¢£¬²¢ÅÐ¶ÏµÇÂ¼ÐÅÏ¢ÊÇ·ñ´æÔÚÓÚÓÃ»§ÐÅÏ¢Êý¾Ý¿âÖÐ£»ÈôµÇÂ¼ÐÅÏ¢²»´æÔÚÓÚÓÃ»§ÐÅÏ¢Êý¾Ý¿âÖÐÊ±£¬Ôò¾Ü¾øµÇÂ½½ðÈÚAPP£»ÈôµÇÂ¼ÐÅÏ¢´æÔÚÓÚÓÃ»§ÐÅÏ¢Êý¾Ý¿âÖÐÊ±£¬Ôò¸ù¾ÝµÇÂ¼ÐÅÏ¢Éú³ÉË®Ó¡ÐÅÏ¢£¬½«Ë®Ó¡ÐÅÏ¢Ç¶Èëµ½½ðÈÚAPPµÄ½çÃæÖÐÉú³É¾ß…	Êý¾Ý·ÖÎö
Ò»ÖÖÉúÎïÌØÕ÷ÐÅÏ¢´¦Àí·½·¨¡¢ÖÕ¶Ë¼°¼ÆËã»ú¿É¶Á´æ´¢½éÖÊ	Öéº£ÊÐ÷È×å¿Æ¼¼ÓÐÏÞ¹«Ë¾	2017-10-31	2018-03-09	CN107784217A	Ö÷·ÖÀàºÅ£ºG06F21/32(2013.01)I	ÔÚÉó-ÊµÖÊÉó²éµÄÉúÐ§	519000 ¹ã¶«Ê¡Öéº£ÊÐ¿Æ¼¼´´ÐÂº£°¶÷È×å¿Æ¼¼Â¥	±¾·¢Ã÷Ìá¹©Ò»ÖÖÉúÎïÌØÕ÷ÐÅÏ¢´¦Àí·½·¨¡¢ÖÕ¶Ë¼°¼ÆËã»ú¿É¶Á´æ´¢½éÖÊ£¬ÔÚ»ñÈ¡ÉúÎïÌØÕ÷ÐÅÏ¢ºó£¬È·¶¨ÖÕ¶ËÖÐÓëÉúÎïÌØÕ÷ÐÅÏ¢¶ÔÓ¦µÄÓ¦ÓÃ£¬²¢¶ÔÉúÎïÌØÕ÷ÐÅÏ¢½øÐÐ¼ÆËã£¬µÃµ½Ó¦ÓÃ¶ÔÓ¦µÄÉúÎïÌØÕ÷±êÊ¶ÐÅÏ¢¡£¶ø¸ÃÓ¦ÓÃ¶ÔÓ¦µÄÉúÎïÌØÕ÷±êÊ¶ÐÅÏ¢²»Í¬ÓÚÖÕ¶ËÖÐÆäËûÓ¦ÓÃÖÐµÄÖÁÉÙ²¿·ÖÓ¦ÓÃ¶ÔÓ¦µÄÉúÎïÌØÕ÷±êÊ¶ÐÅÏ¢£¬ÕâÒâÎ¶×ÅÖÕ¶ËÖÐÓÐ²¿·ÖÓ¦ÓÃ¶ÔÓ¦µÄÉúÎïÌØÕ÷±êÊ¶ÐÅÏ¢ÊÇ²»Í¬ÓÚÖÕ¶ËÖÐÆäËûÓ¦ÓÃ¶ÔÓ¦µÄÉúÎïÌØÕ÷±êÊ¶ÐÅÏ¢£¬ÕâÑù¶ÔÓÚ¶ÔÓ¦²»Í¬µÄÉúÎïÌØÕ÷±êÊ¶ÐÅÏ¢µÄÓ¦Ó…	°²È«
½ðÈÚAPP½çÃæµÄË®Ó¡Ç¶Èë·½·¨¡¢×°ÖÃ¡¢Éè±¸¼°´æ´¢½éÖÊ	Æ½°²¿Æ¼¼£¨ÉîÛÚ£©ÓÐÏÞ¹«Ë¾	2017-10-31	2018-04-06	CN107885565A	Ö÷·ÖÀàºÅ£ºG06F9/451(2018.01)I	ÔÚÉó-ÊµÖÊÉó²éµÄÉúÐ§	518000 ¹ã¶«Ê¡ÉîÛÚÊÐ¸£ÌïÇø°ËØÔÁë¹¤ÒµÇøÆ½°²´óÏÃÁùÂ¥	±¾·¢Ã÷ÊôÓÚ½ðÈÚAPP¼¼ÊõÁìÓò£¬Ìá¹©Ò»ÖÖ½ðÈÚAPP½çÃæµÄË®Ó¡Ç¶Èë·½·¨¡¢×°ÖÃ¡¢Éè±¸¼°´æ´¢½éÖÊ£¬Í¨¹ý»ñÈ¡µÇÂ½ËùÊö½ðÈÚAPPµÄÓÃ»§ÐÅÏ¢£¬¸ù¾ÝËùÊöÓÃ»§ÐÅÏ¢Éú³ÉË®Ó¡£»»ñÈ¡ËùÊö½ðÈÚAPPµÄ½çÃæÉÏµÄ¿Ø¼þµÄ½çÃæÇøÓò£»ÔÚËùÊö½ðÈÚAPPµÄ½çÃæÉÏÉèÖÃËùÊöË®Ó¡£¬²¢¶ÔËùÊöË®Ó¡µÄÇøÓò½øÐÐ¿Ø¼þ¼ì²â£¬ÈôËùÊöË®Ó¡µÄÇøÓòÓëËùÊö¿Ø¼þµÄ½çÃæÇøÓò´æÔÚÖØºÏÇøÓòÊ±£¬ÔòÒÆ¶¯ËùÊöË®Ó¡Ê¹ËùÊöË®Ó¡µÄÇøÓòÓëËùÊö¿Ø¼þµÄ½çÃæÇøÓòÖÁ¶à´æÔÚÒ»¸öÖØºÏµã£¬Ê¹Ìí¼ÓµÄË®Ó¡²»ÕÚµ²¿Ø¼þ£¬…	°²È«
Ò»ÖÖÒøÐÐ¿Í»§Êý¾Ý°²È«¹ÜÀí·½·¨¼°ÏµÍ³	±±¾©Ã÷³¯Íò´ï¿Æ¼¼¹É·ÝÓÐÏÞ¹«Ë¾	2017-11-06	2018-04-10	CN107895121A	Ö÷·ÖÀàºÅ£ºG06F21/62(2013.01)I	ÔÚÉó-ÊµÖÊÉó²éµÄÉúÐ§	100097 ±±¾©ÊÐº£µíÇøÀ¶µå³§ÄÏÂ·25ºÅ¼ÎÓÑ¹ú¼Ê´óÏÃ±±Çø2²ã	±¾·¢Ã÷¹«¿ªÁËÒ»ÖÖÒøÐÐ¿Í»§Êý¾Ý°²È«¹ÜÀí·½·¨¼°ÏµÍ³£¬¸Ã·½·¨°üÀ¨ÒÔÏÂ²½Öè£º¶ÔÓÃ»§°²È«¼¶±ð½øÐÐ»®·Ö£¬²¢¸³Óè²»Í¬µÄÓÃ»§È¨ÏÞ£»Êý¾Ý·ÖÀà·Ö¼¶·þÎñÆ÷»ñµÃÒøÐÐ¿Í»§Êý¾Ý£»Êý¾Ý·ÖÀà·Ö¼¶·þÎñÆ÷½«ÒøÐÐ¿Í»§Êý¾Ý·ÖÀà·Ö¼¶ºó·¢ÍùÔÆ´æ´¢£»ÔÆ´æ´¢ºÍÓÃ»§×ÀÃæÄÚµÄ±¾µØ°²È«Êý¾Ý¿Õ¼ä½øÐÐÊý¾ÝÍ¬²½£»ÓÃ»§¸ù¾ÝÓÃ»§È¨ÏÞ¶ÔÏàÓ¦·ÖÀà¼¶±ðµÄÒøÐÐ¿Í»§Êý¾Ý½øÐÐ²Ù×÷¡£Í¨¹ý±¾·½°¸£¬±£Ö¤ÁËÔÚÒøÐÐ°ì¹«»·¾³ÖÐÊ¹ÓÃÒøÐÐ¿Í»§Êý¾ÝµÄ°²È«ÐÔ¡£	°²È«
ÒøÐÐÕË»§½â¹ÒÊ§ÒµÎñ´¦Àí·½·¨¡¢ÏµÍ³¡¢ÖÕ¶Ë¼°´æ´¢½éÖÊ	Æ½°²¿Æ¼¼£¨ÉîÛÚ£©ÓÐÏÞ¹«Ë¾	2017-11-08	2018-04-10	CN107895256A	Ö÷·ÖÀàºÅ£ºG06Q10/10(2012.01)I	ÔÚÉó-ÊµÖÊÉó²éµÄÉúÐ§	518000 ¹ã¶«Ê¡ÉîÛÚÊÐ¸£ÌïÇø°ËØÔÁë¹¤ÒµÇøÆ½°²´óÏÃÁùÂ¥	±¾·¢Ã÷¹«¿ªÁËÒ»ÖÖ×ÔÖúÖÕ¶ËµÄÒøÐÐÕË»§½â¹ÒÊ§ÒµÎñ´¦Àí·½·¨£¬Í¨¹ýÏìÓ¦ÓÃ»§·¢ÆðµÄ¹ÒÊ§»ò½â¹ÒÇëÇó£¬ÓëÔ¶³Ì×øÏ¯ÖÕ¶ËÍ¨ÐÅÁ¬½Ó£»½ÓÊÕÔ¶³Ì×øÏ¯ÖÕ¶Ë·¢ËÍµÄÉí·ÝÑéÖ¤Êý¾Ý»ñÈ¡ÇëÇó£¬¸ù¾Ý¸ÃÇëÇóÌáÊ¾ÓÃ»§ÊäÈëÉí·ÝÑéÖ¤Êý¾Ý£¬²¢½«ÊäÈëµÄÉí·ÝÑéÖ¤Êý¾Ý·´À¡ÖÁÔ¶³Ì×øÏ¯ÖÕ¶Ë£¬¹©Ô¶³Ì×øÏ¯ºË²éÓÃ»§Éí·Ý£»ÔÚ½ÓÊÕµ½Ô¶³Ì×øÏ¯ÖÕ¶Ë·¢ËÍµÄÓÃ»§Éí·ÝºË²éÍ¨¹ýÖ¸ÁîÊ±£¬¸ù¾ÝÓÃ»§Éí·ÝÐÅÏ¢²éÑ¯ÓÃ»§µÄÕË»§ÐÅÏ¢£¬²¢ÏÔÊ¾±»²éÑ¯µÃµ½µÄÕË»§ÐÅÏ¢£»¸ù¾ÝÓÃ»§µÄÊäÈëÖ¸ÁîÈ·¶¨¹ÒÊ§»…	°²È«
Ò»ÖÖ½ðÈÚÍ¼Ïñ¸ñÊ½µÄ±àÂë¡¢½âÂë·½·¨¼°Éè±¸¡¢´æ´¢½éÖÊ	ÉÏº£¿íÈ«ÖÇÄÜ¿Æ¼¼ÓÐÏÞ¹«Ë¾	2017-11-08	2018-03-06	CN107767426A	Ö÷·ÖÀàºÅ£ºG06T9/00(2006.01)I	ÔÚÉó-¹«¿ª	201802 ÉÏº£ÊÐ¼Î¶¨ÇøÖÚÈÊÂ·399ºÅ1´±12²ãBÇøJ1558ÊÒ	±¾·¢Ã÷Ìá¹©µÄÒ»ÖÖ½ðÈÚÍ¼Ïñ¸ñÊ½µÄ±àÂë¡¢½âÂë·½·¨¼°Éè±¸¡¢´æ´¢½éÖÊ£¬±àÂë·½·¨°üÀ¨£ºÊäÈëµÚÒ»½ðÈÚÊý¾Ý£»Ê¹ÓÃÏ¡ÊèÂË²¨²ÉÑù²¢´æ´¢Éú³ÉÄ¿±ê½ðÈÚÊý¾Ý£»¶ÔËùÊöÄ¿±ê½ðÈÚÊý¾Ý½øÐÐ±àÂë£¬ÆäÖÐËùÊöµÄµÚËÄ½ðÈÚÊý¾Ý¸ù¾Ý¶àÎ¬Ê±¼äÐòÁÐÊý¾ÝÏà¹Ø£¬²¢ÇÒ¸÷Î¬¶ÈµÄÊ±¼äÐòÁÐÊý¾ÝÖ®¼ä²ÉÓÃÈßÓàµÄ·½Ê½±»±àÂë£»»ùÓÚËùÊöµÚËÄ½ðÈÚÊý¾Ý£¬ÒÔÌØ¶¨µÄË³Ðò½«ËùÊö±àÂëºóµÄÊ±¼äÐòÁÐÊý¾ÝÅÅÁÐÔÚ±ÈÌØÁ÷ÖÐ£»Ê¹ÓÃÌØ¶¨µÄÐÅÁîÐÅÏ¢À´Ö¸¶¨ËùÊöÌØ¶¨µÄË³Ðò£»Éú³ÉËùÊöÍ¼Ïñ£»¶ÔËùÊöÍ¼Ï…	Êý¾Ý·ÖÎö
[truncated: 19,854 more rows]
